# Supplementary material
Source: PubMed Central journal article supplement (PMC4339527)

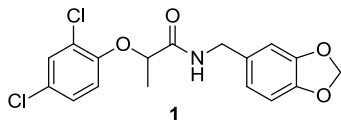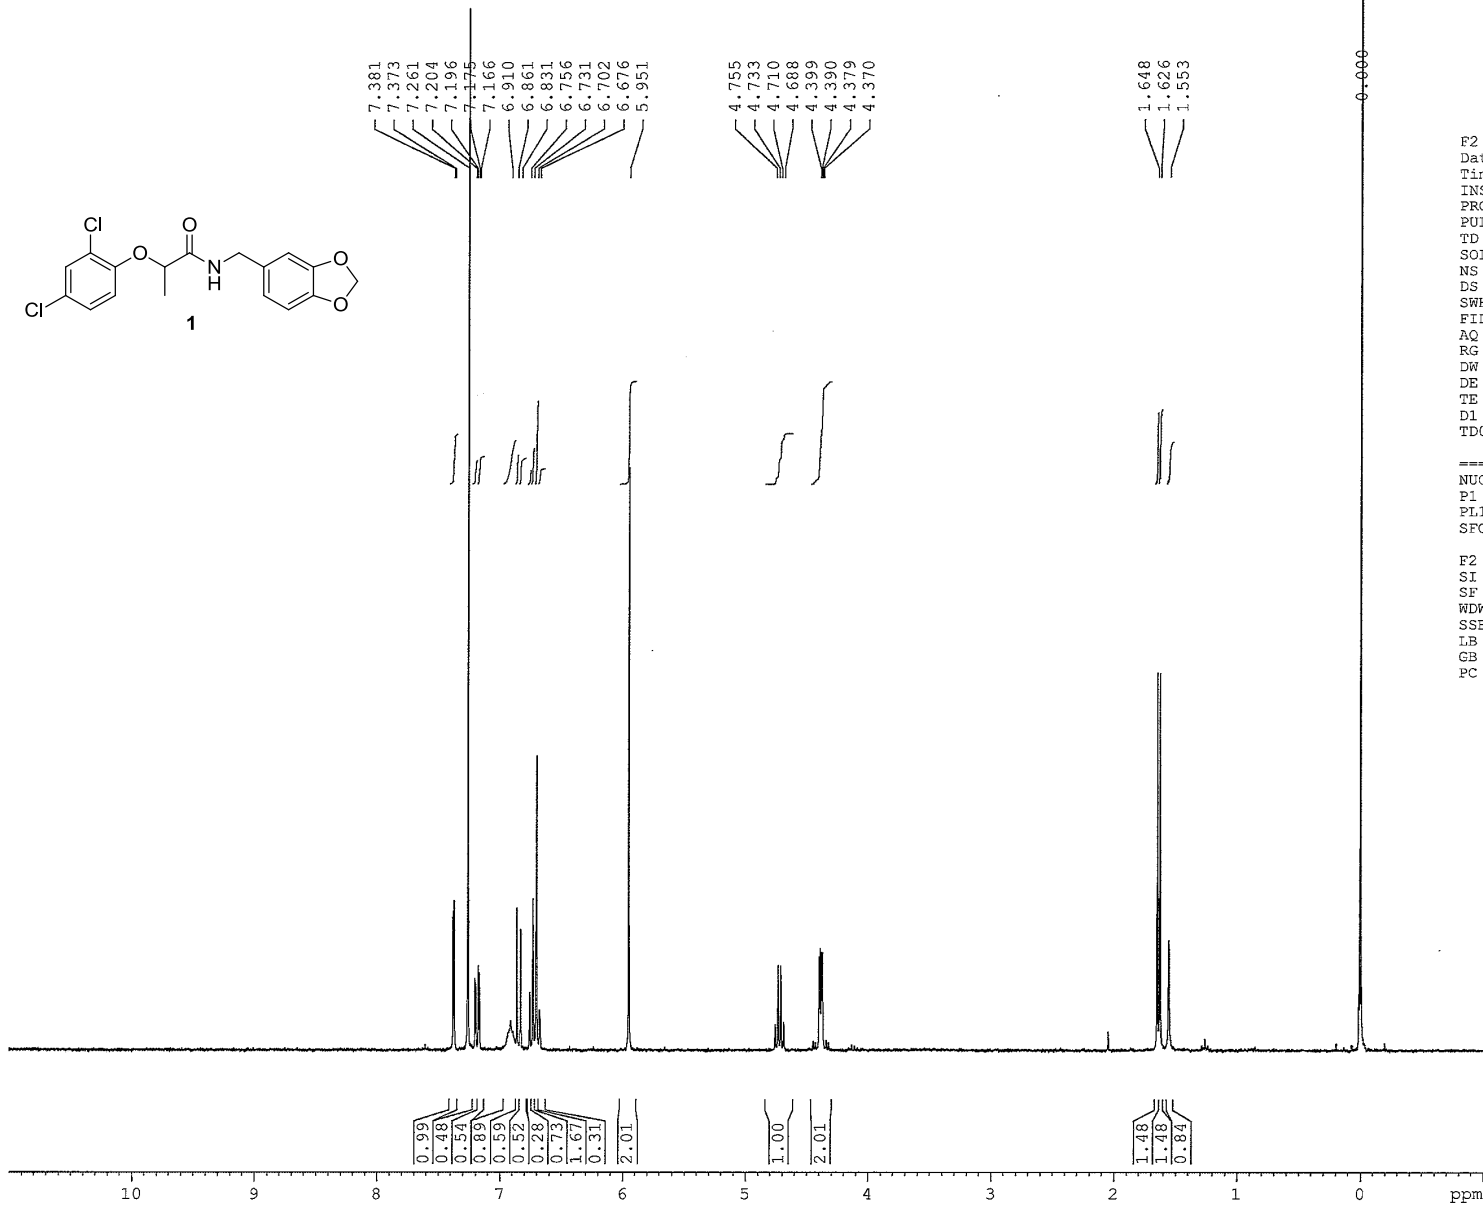

F2 - Acquisition Parameters  
 Date\_ 20090116  
 Time 11.50  
 INSTRUM spect  
 PROBHD 5 mm BBO BB-1H  
 PULPROG zg30  
 TD 65536  
 SOLVENT CDCl3  
 NS 16  
 DS 2  
 SWH 6172.839 Hz  
 FIDRES 0.094190 Hz  
 AQ 5.3084660 sec  
 RG 2580.3  
 DW 81.000 usec  
 DE 6.50 usec  
 TE 296.1 K  
 D1 1.00000000 sec  
 TDO 1

==== CHANNEL f1 =====  
 NUC1 1H  
 P1 10.00 usec  
 PLL 9.20 dB  
 SFO1 299.7018508 MHz

F2 - Processing parameters  
 SI 32768  
 SF 299.7000048 MHz  
 WDW EM  
 SSB 0  
 LB 0.30 Hz  
 GB 0  
 PC 1.00

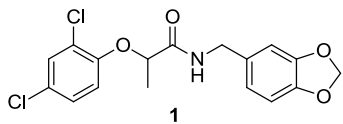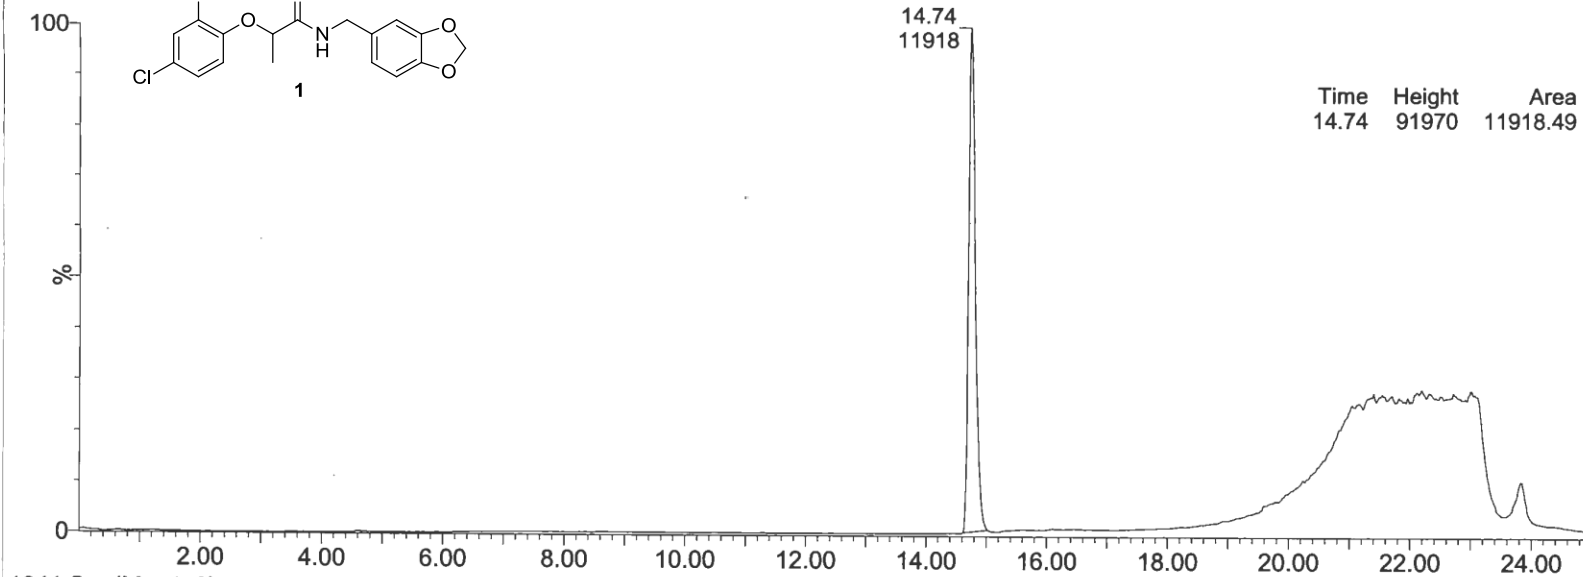

ELSD  
An2  
9.27e4  
Area  
Area%

1641 Sm (Mn, 1x2)

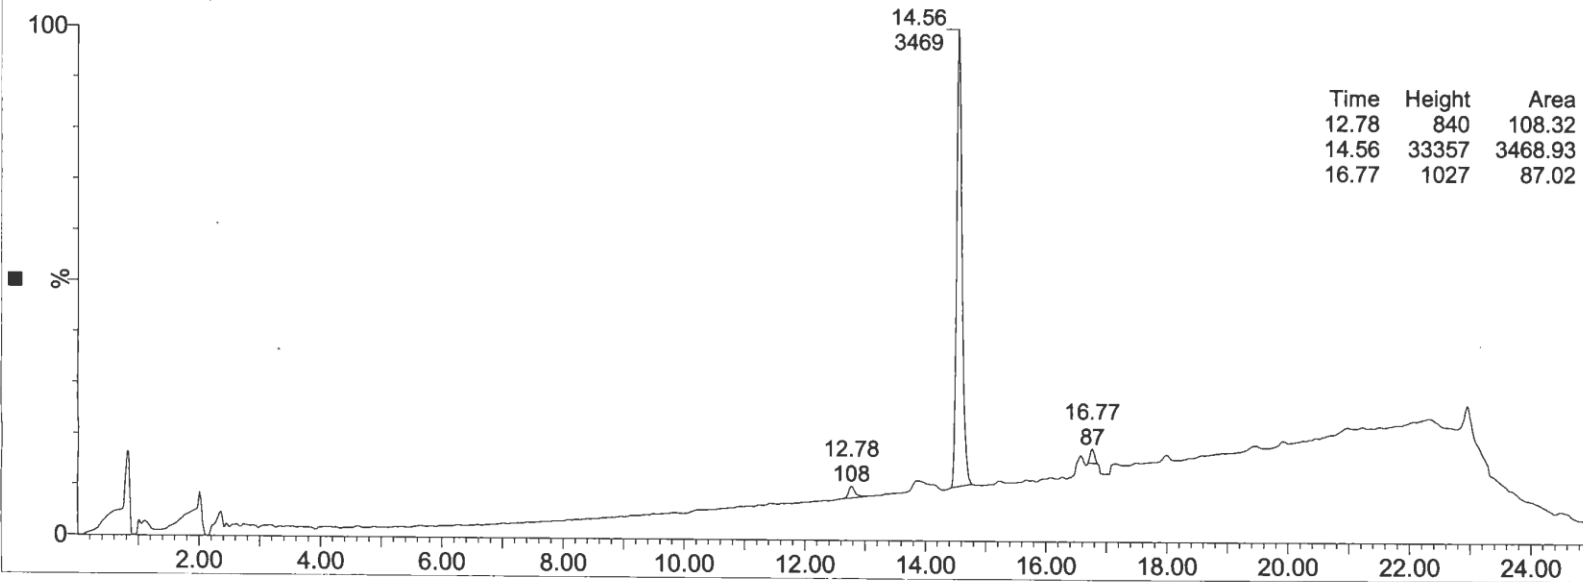

UV  
An1  
3.73e4  
Area  
Area%

1: Scan ES+  
9.15e7

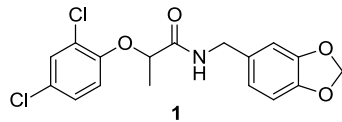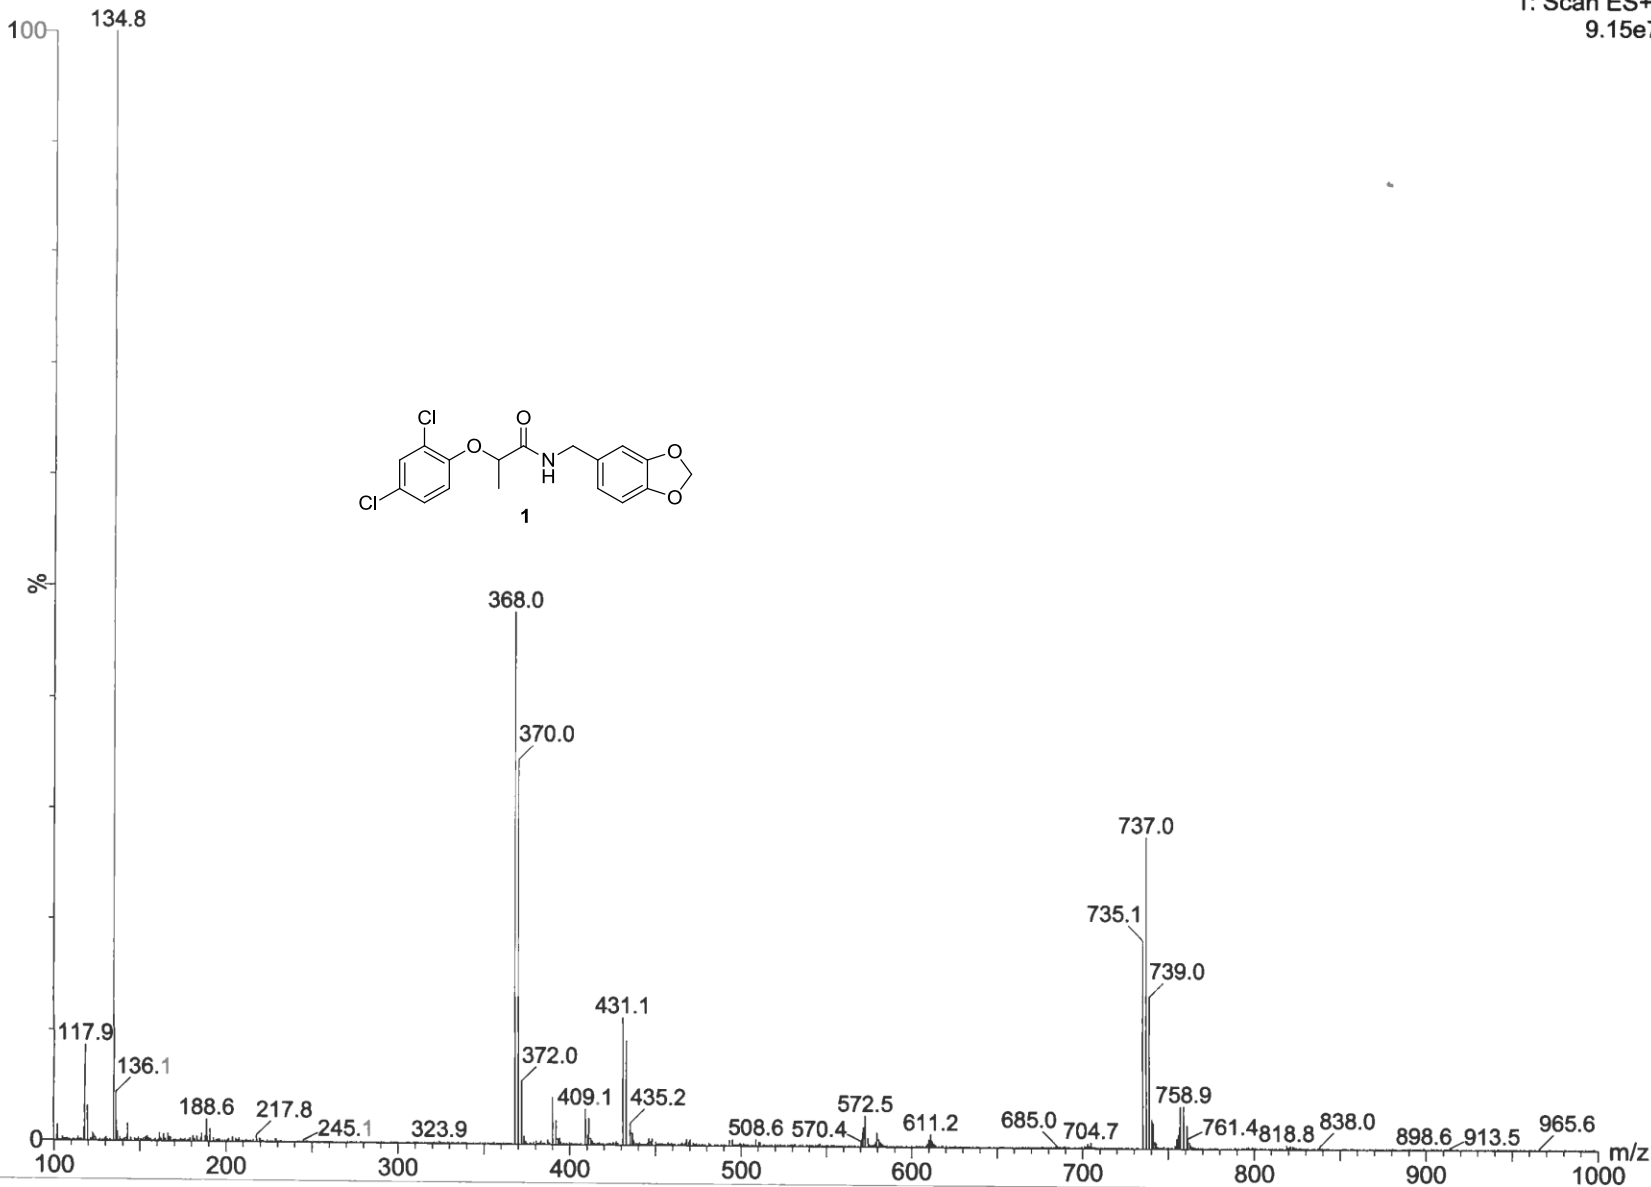

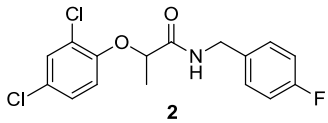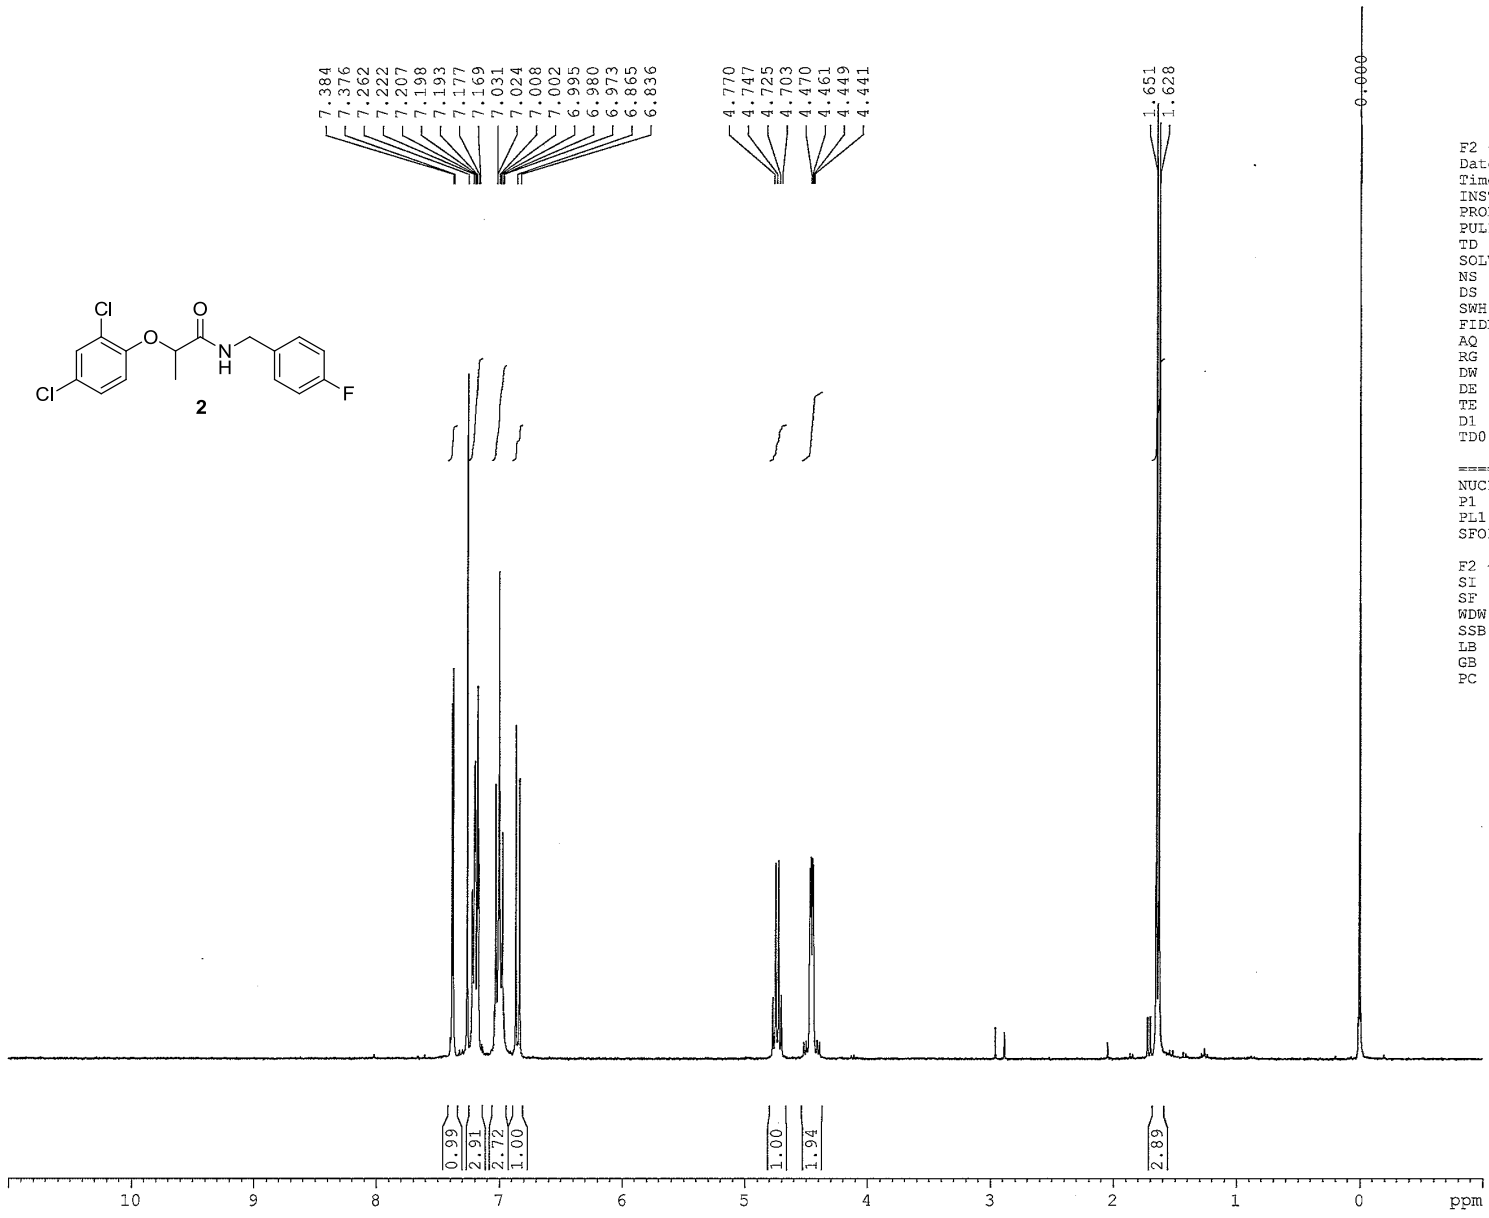

F2 - Acquisition Parameters  
 Date\_ 20090116  
 Time 12.13  
 INSTRUM spect  
 PROBHD 5 mm BBO BB-1H  
 PULPROG zg30  
 TD 65536  
 SOLVENT CDC13  
 NS 16  
 DS 2  
 SWH 6172.839 Hz  
 FIDRES 0.094190 Hz  
 AQ 5.3084660 sec  
 RG 1625.5  
 DW 81.000 usec  
 DE 6.50 usec  
 TE 296.3 K  
 D1 1.00000000 sec  
 TD0 1

===== CHANNEL f1 =====  
 NUC1 1H  
 P1 10.00 usec  
 PL1 9.20 dB  
 SFO1 299.7018508 MHz

F2 - Processing parameters  
 SI 32768  
 SF 299.7000035 MHz  
 WDW EM  
 SSB 0  
 LB 0.30 Hz  
 GB 0  
 PC 1.00



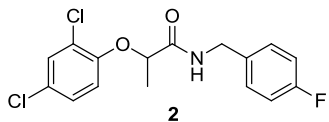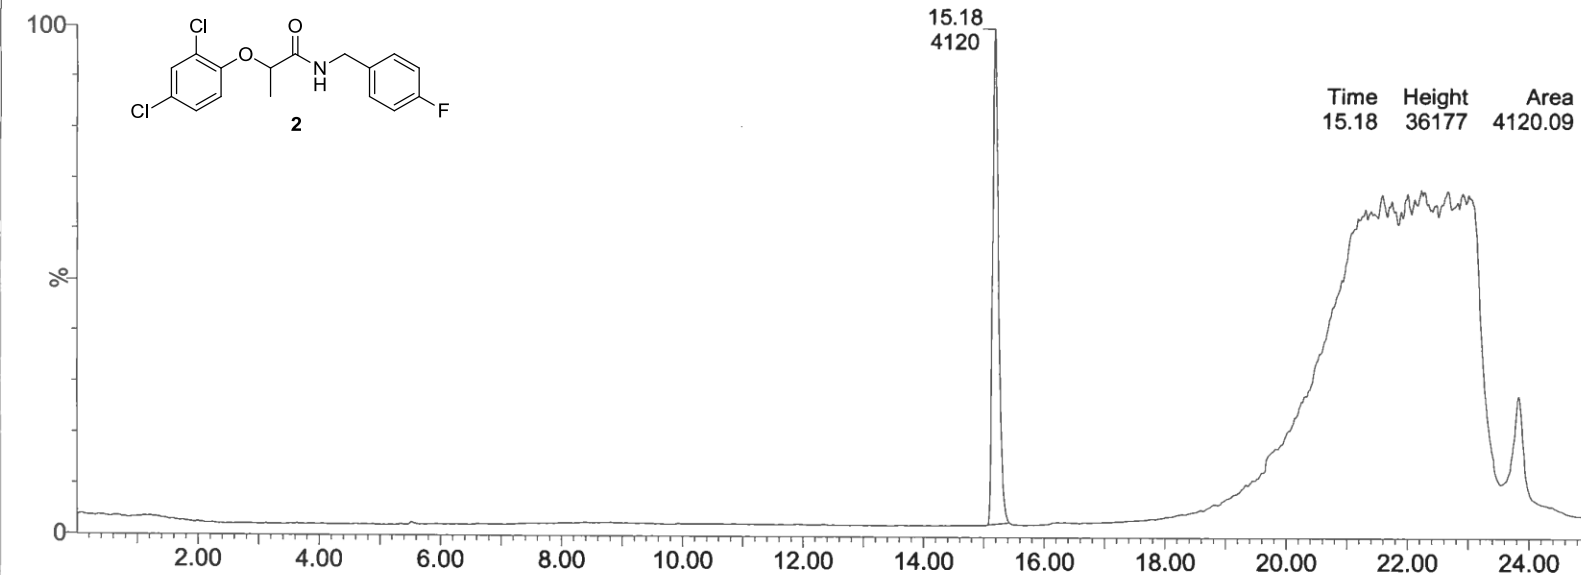

ELSD  
An2  
3.71e4  
Area  
Area%

| Time  | Height | Area    | Area%  |
|-------|--------|---------|--------|
| 15.18 | 36177  | 4120.09 | 100.00 |

1642 Sm (Mn, 1x2)

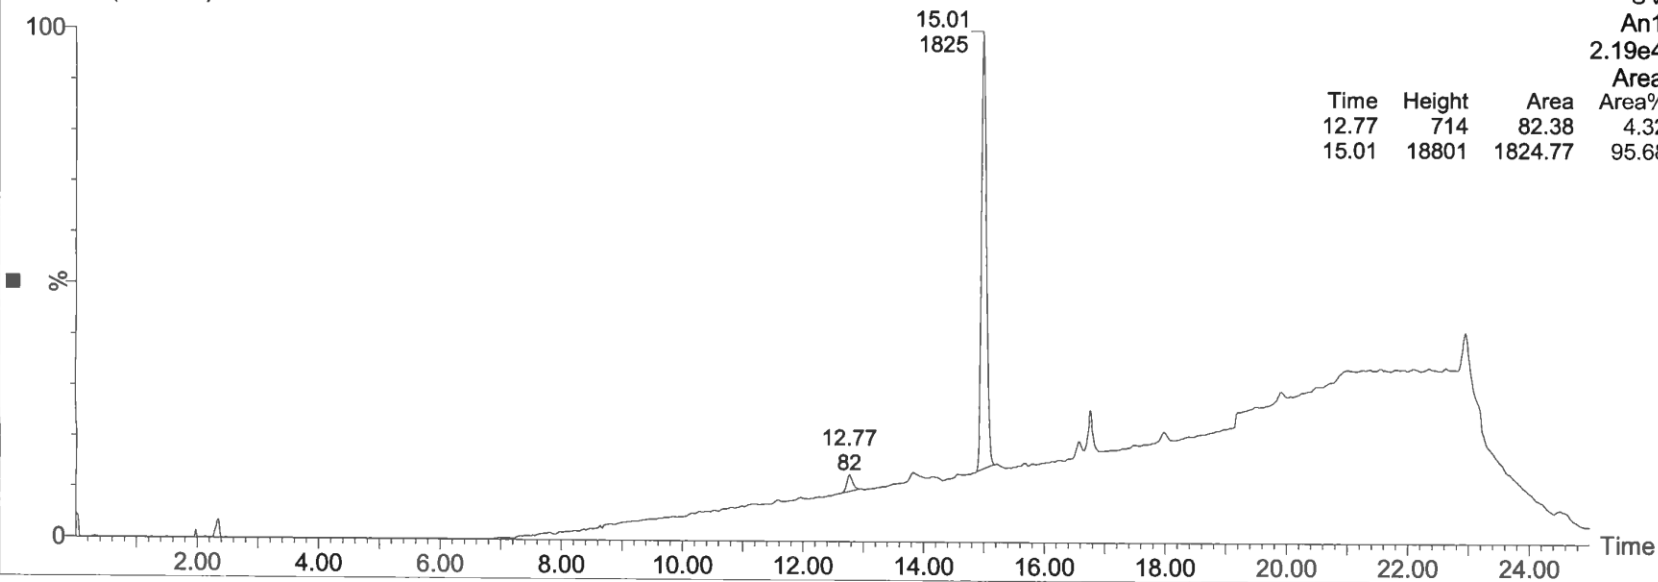

UV  
An1  
2.19e4  
Area  
Area%

| Time  | Height | Area    | Area% |
|-------|--------|---------|-------|
| 12.77 | 714    | 82.38   | 4.32  |
| 15.01 | 18801  | 1824.77 | 95.68 |

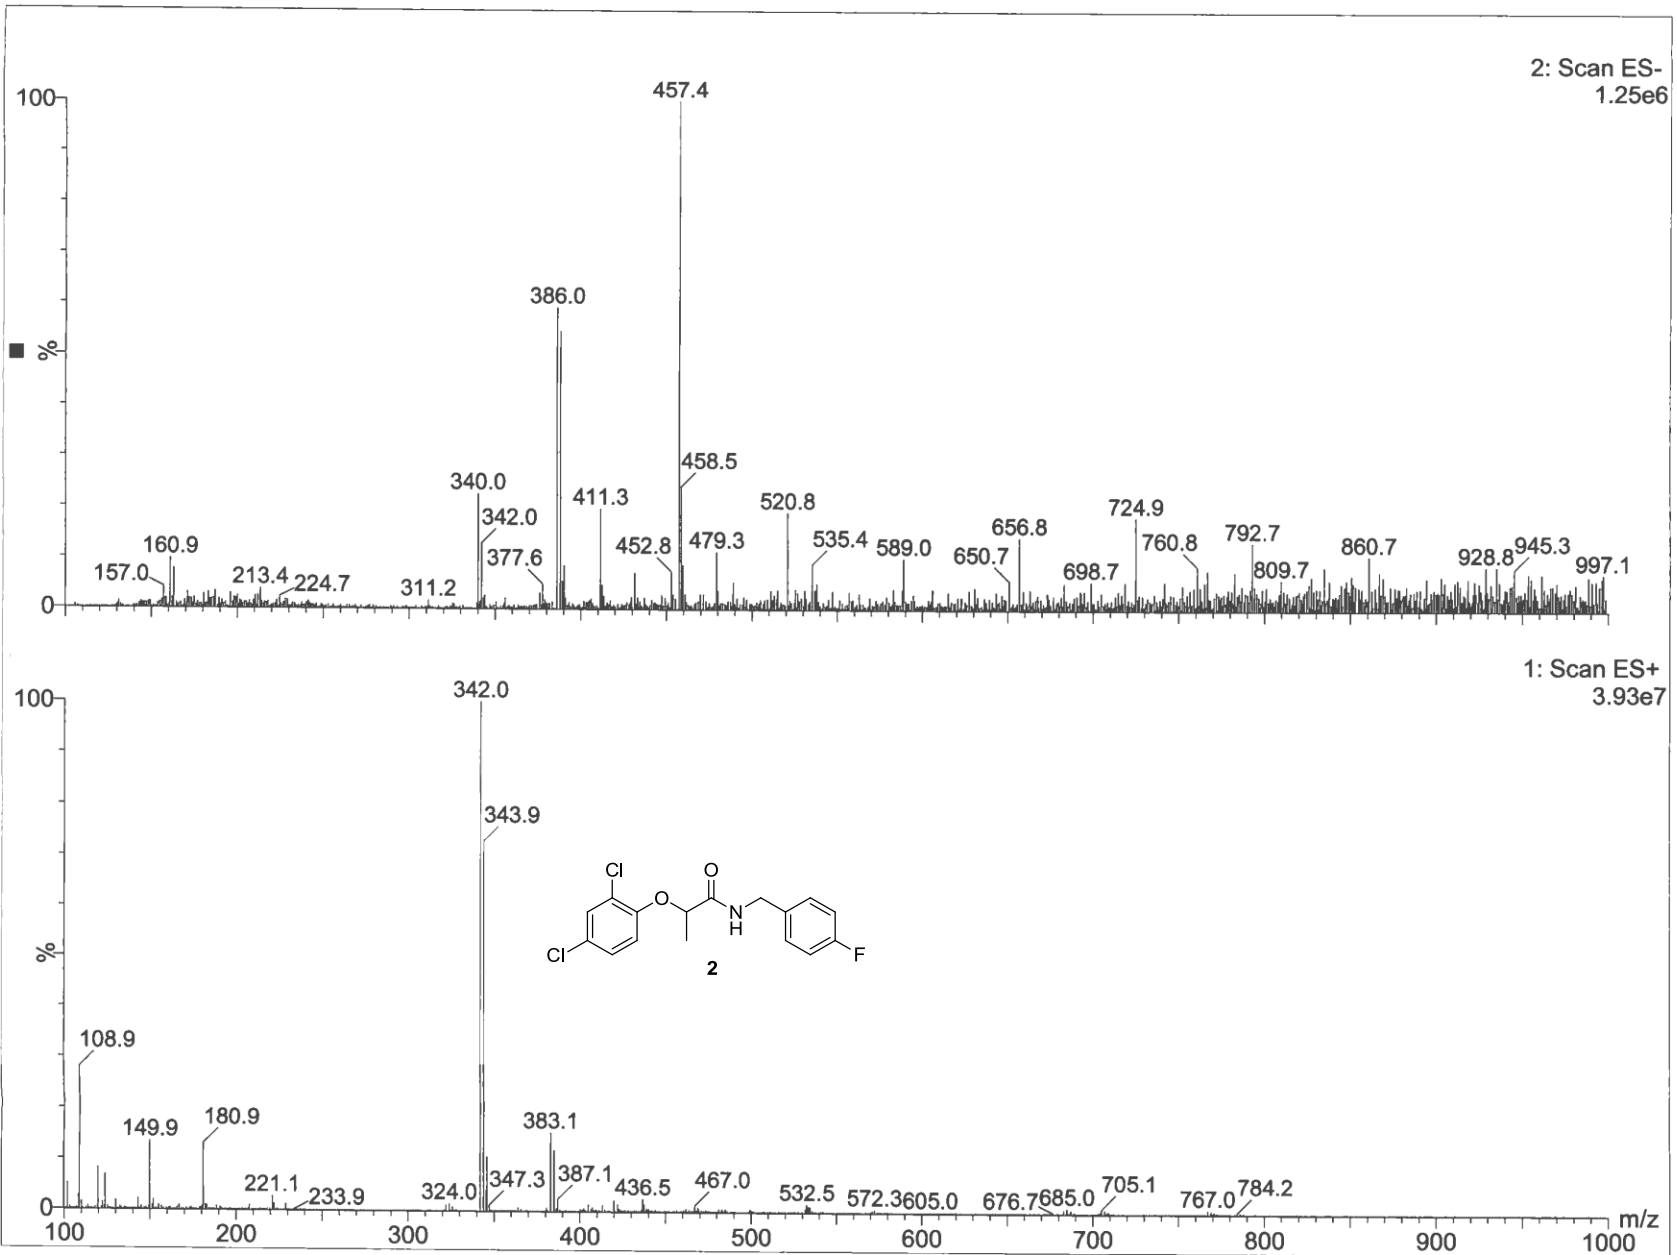

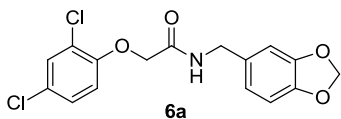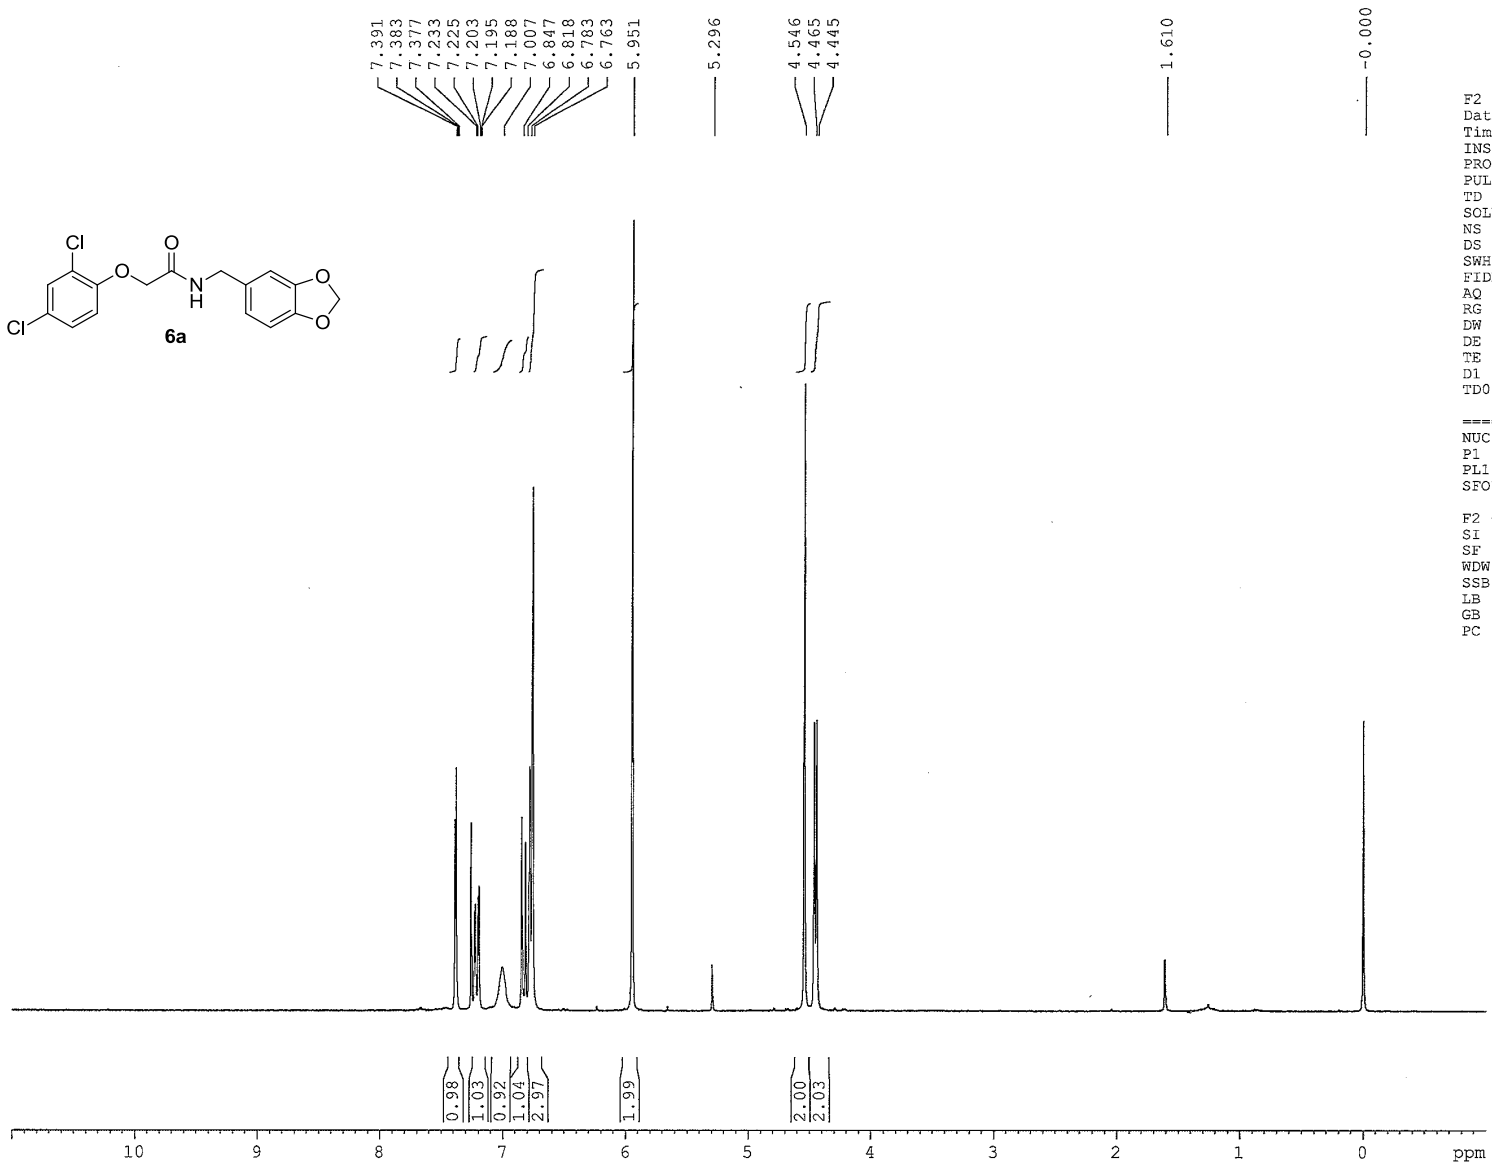

F2 - Acquisition Parameters  
 Date\_ 20090212  
 Time\_ 14.43  
 INSTRUM spect  
 PROBHD 5 mm BBO BB-1H  
 PULPROG zg30  
 TD 65536  
 SOLVENT CDCl3  
 NS 16  
 DS 2  
 SWH 6172.839 Hz  
 FIDRES 0.094190 Hz  
 AQ 5.3084660 sec  
 RG 1149.4  
 DW 81.000 usec  
 DE 6.50 usec  
 TE 301.0 K  
 D1 1.00000000 sec  
 TD0 1

===== CHANNEL f1 =====  
 NUC1 1H  
 P1 10.00 usec  
 PL1 9.20 dB  
 SFO1 299.7018508 MHz

F2 - Processing parameters  
 SI 32768  
 SF 299.7000050 MHz  
 WDW EM  
 SSB 0  
 LB 0.30 Hz  
 GB 0  
 PC 1.00

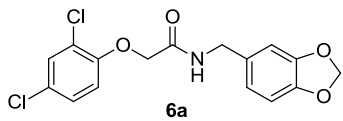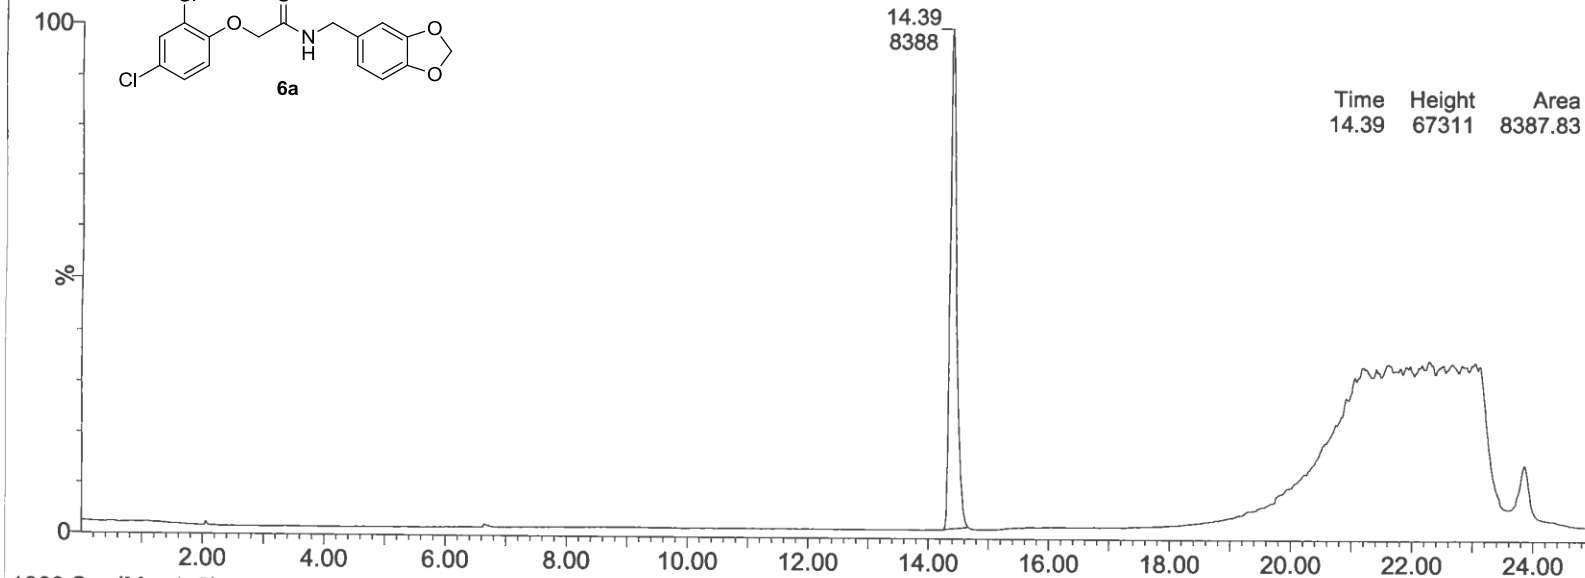

ELSD  
An2  
6.86e4  
Area  
Area%

| Time  | Height | Area    | Area%  |
|-------|--------|---------|--------|
| 14.39 | 67311  | 8387.83 | 100.00 |

1668 Sm (Mn, 1x2)

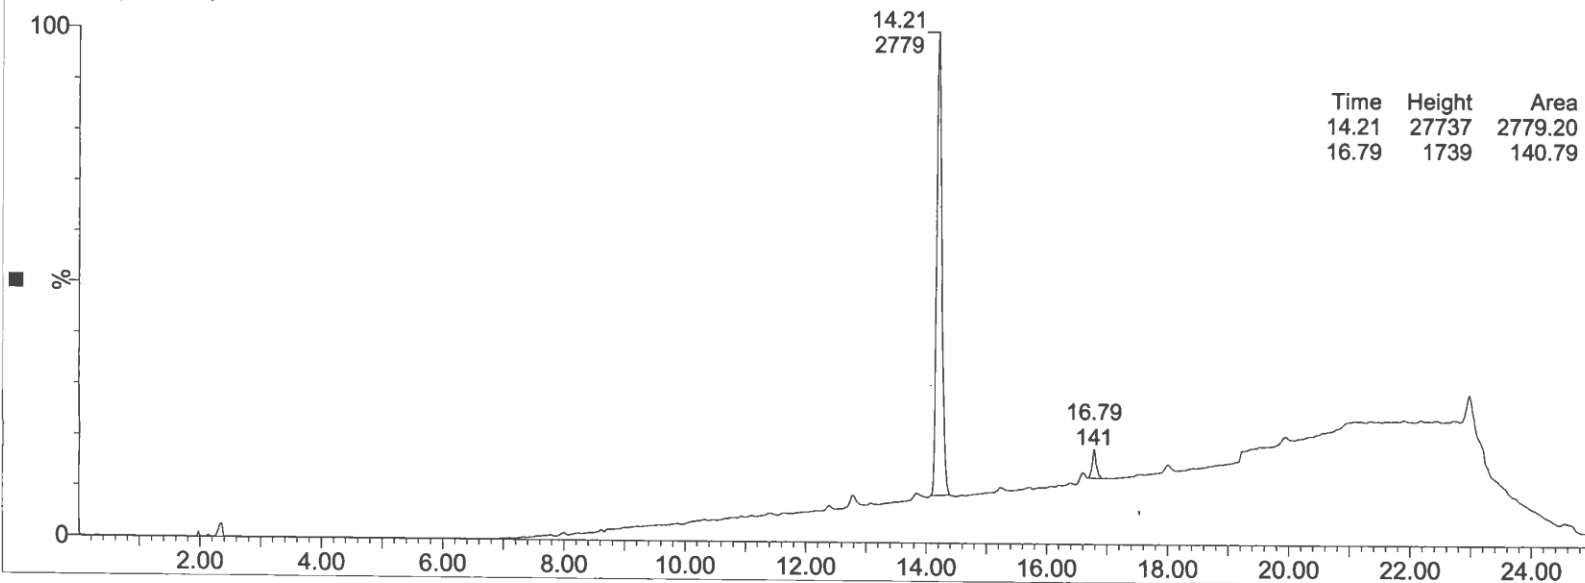

UV  
An1  
3.06e4  
Area  
Area%

| Time  | Height | Area    | Area% |
|-------|--------|---------|-------|
| 14.21 | 27737  | 2779.20 | 95.18 |
| 16.79 | 1739   | 140.79  | 4.82  |

Time

1: Scan ES+  
1.17e8

100  
134.8

%

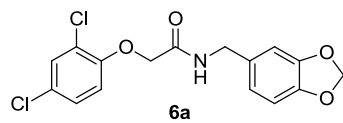

117.9 136.1

143.0 203.8

215.8

273.0

327.0

354.0

355.9

358.0 417.0

436.2

455.2

481.0

551.4

590.6

657.8

674.7

709.0

707.1

710.9

730.9

737.6

782.8

809.7

867.6

905.3

930.9

984.7

993.0

m/z

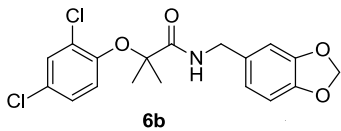

7.416  
7.408  
7.330  
7.322  
7.261  
7.186  
7.178  
7.170  
7.161  
7.157  
7.149  
7.140  
7.132  
7.105  
7.005  
6.966  
6.937

1.1639

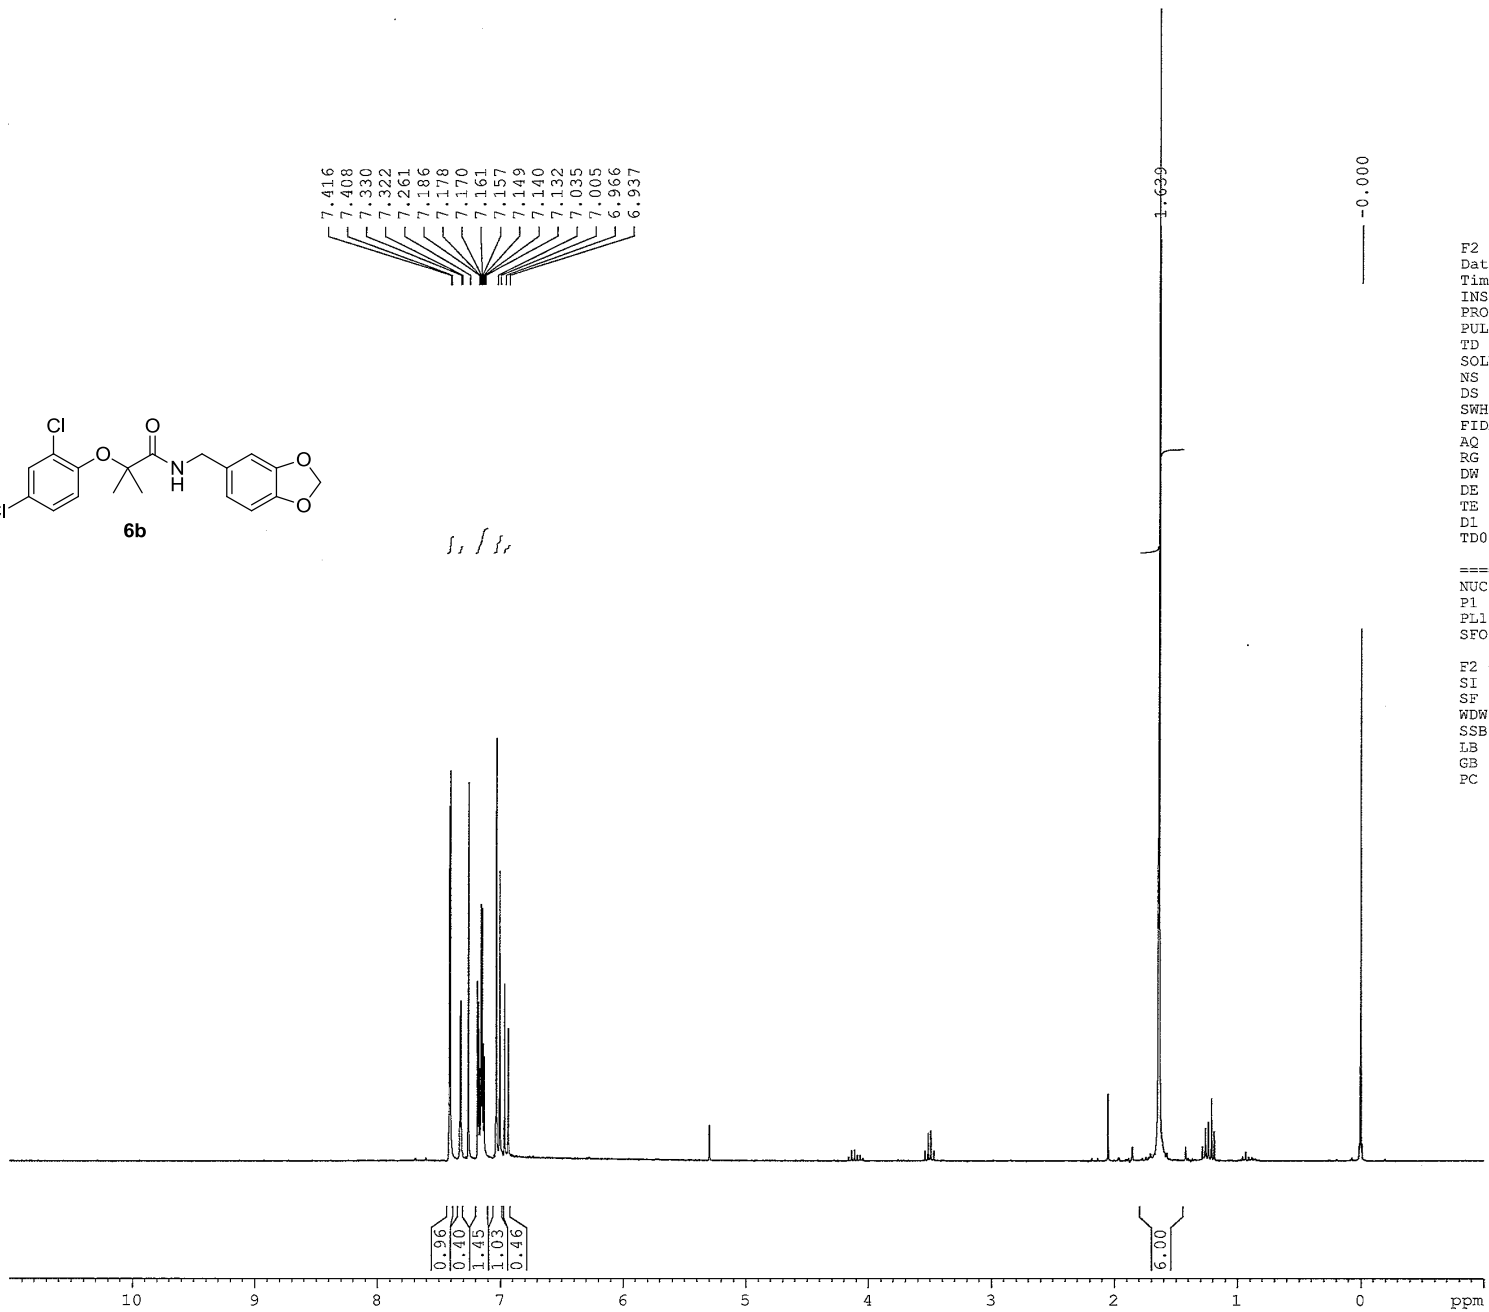

0.96  
0.40  
1.45  
1.03  
0.46

6.00

-0.000

F2 - Acquisition Parameters  
Date\_ 20090224  
Time\_ 17.18  
INSTRUM spect  
PROBHHD 5 mm BBO BB-1H  
PULPROG zg30  
TD 65536  
SOLVENT CDCl3  
NS 16  
DS 2  
SWH 6172.839 Hz  
FIDRES 0.094190 Hz  
AQ 5.3084660 sec  
RG 1149.4  
DW 81.000 usec  
DE 6.50 usec  
TE 299.4 K  
D1 1.00000000 sec  
TD0 1

==== CHANNEL f1 =====  
NUC1 1H  
P1 10.00 usec  
PL1 9.20 dB  
SFO1 299.7018508 MHz

F2 - Processing parameters  
SI 32768  
SF 299.7000045 MHz  
WDW EM  
SSB 0  
LB 0.30 Hz  
GB 0  
PC 1.00

10 9 8 7 6 5 4 3 2 1 0 ppm

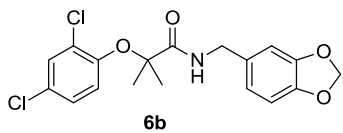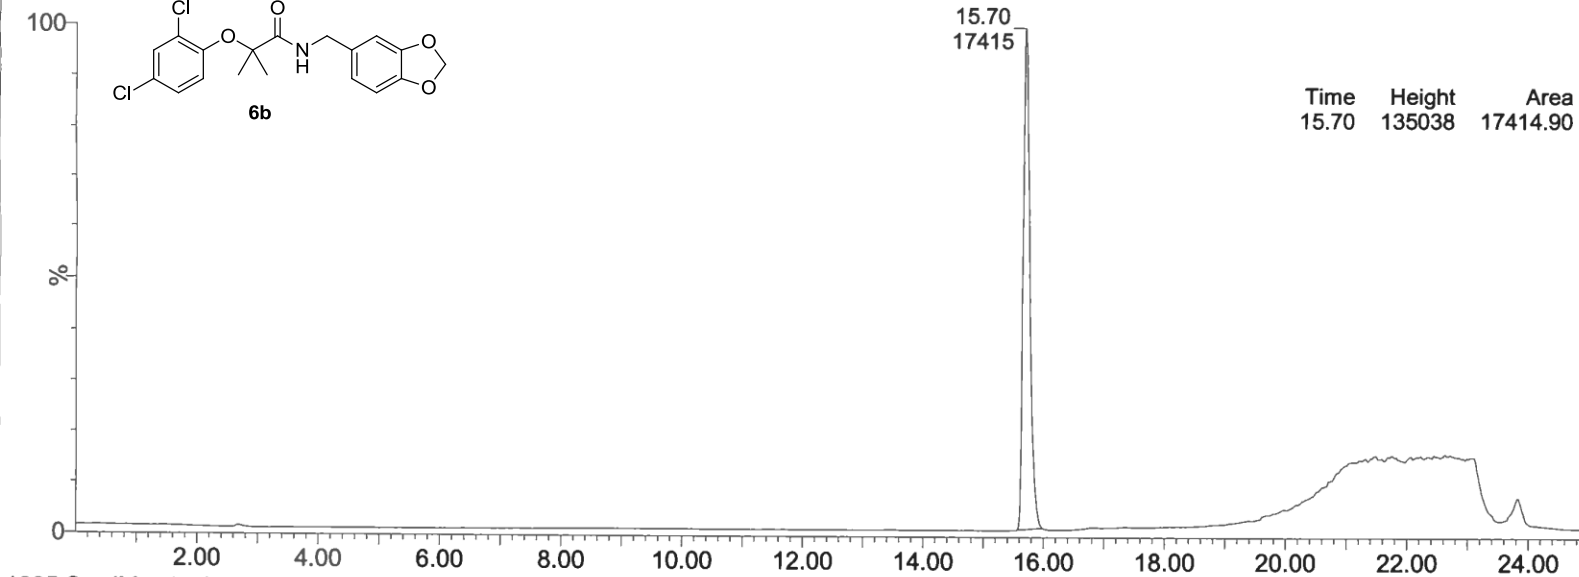

ELSD  
An2  
1.37e5  
Area  
Area%

| Time  | Height | Area     | Area%  |
|-------|--------|----------|--------|
| 15.70 | 135038 | 17414.90 | 100.00 |

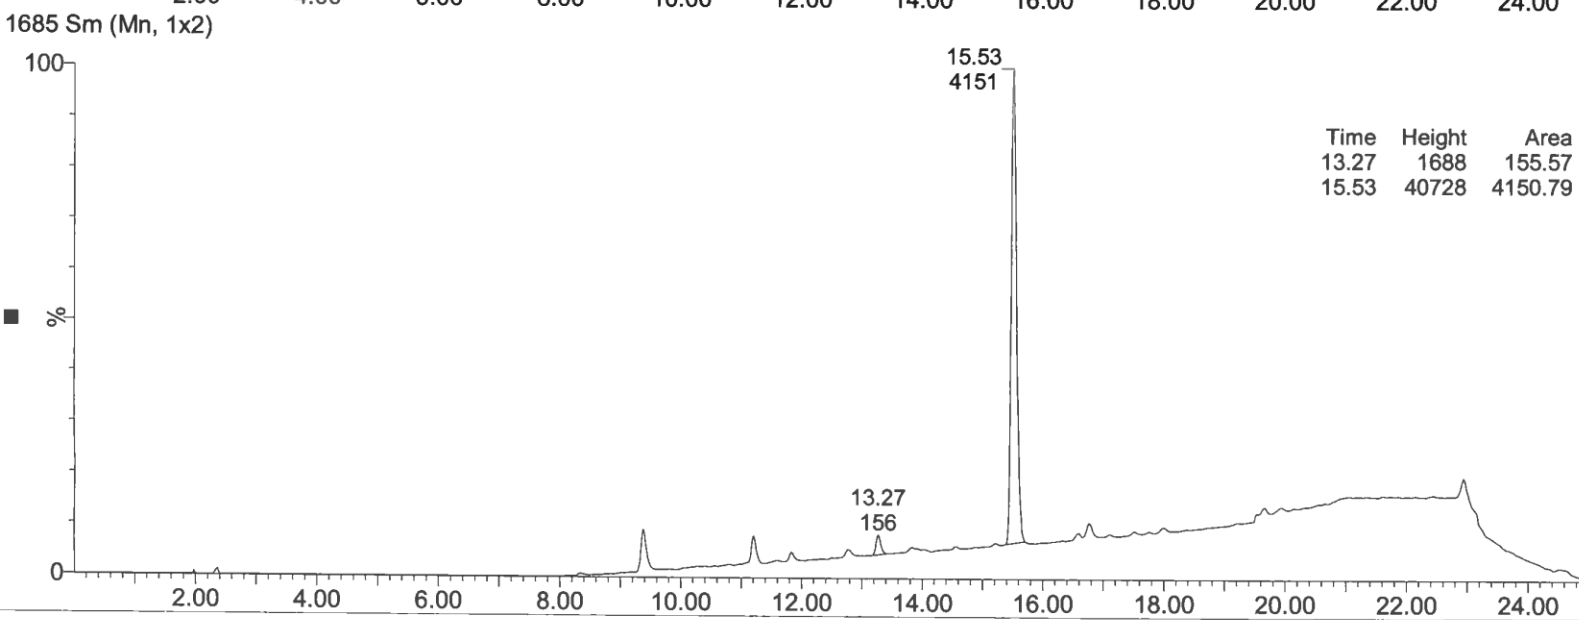

UV  
An1  
4.38e4  
Area  
Area%

| Time  | Height | Area    | Area% |
|-------|--------|---------|-------|
| 13.27 | 1688   | 155.57  | 3.61  |
| 15.53 | 40728  | 4150.79 | 96.39 |

1: Scan ES+  
4.09e7

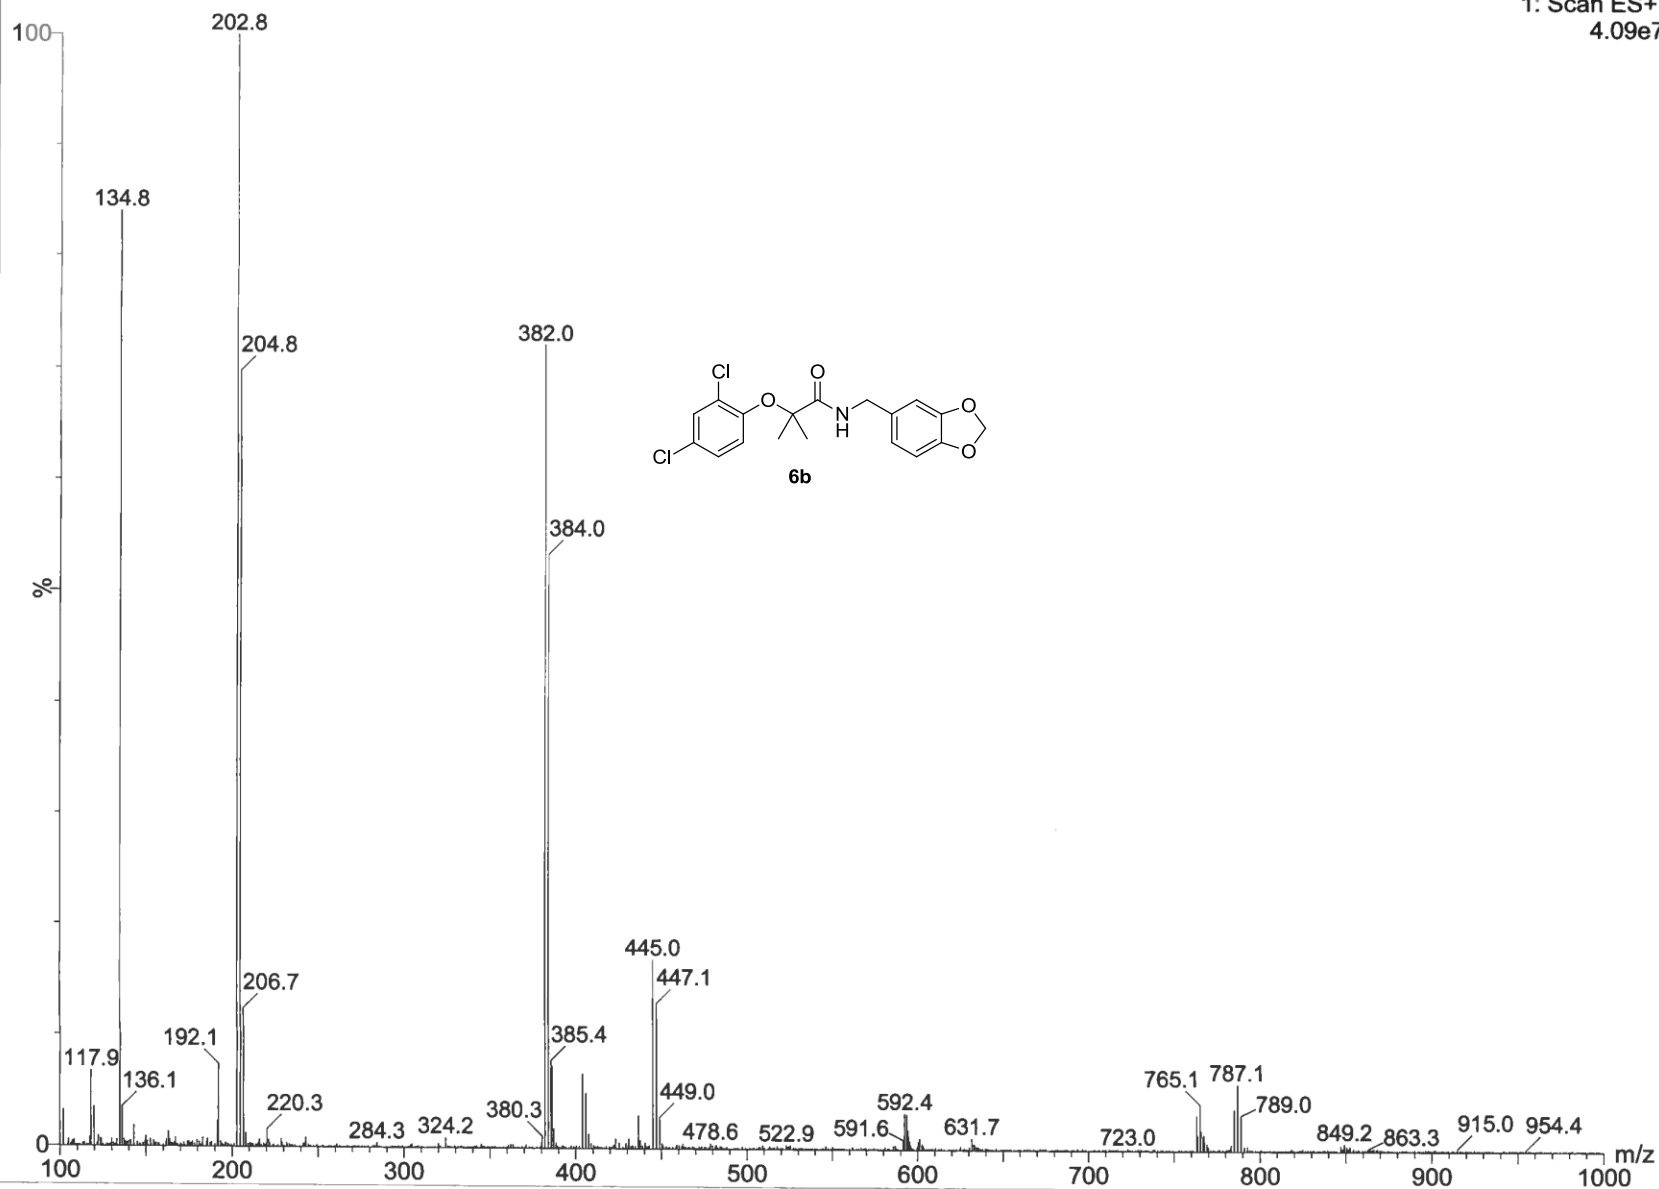



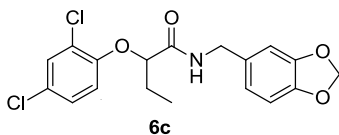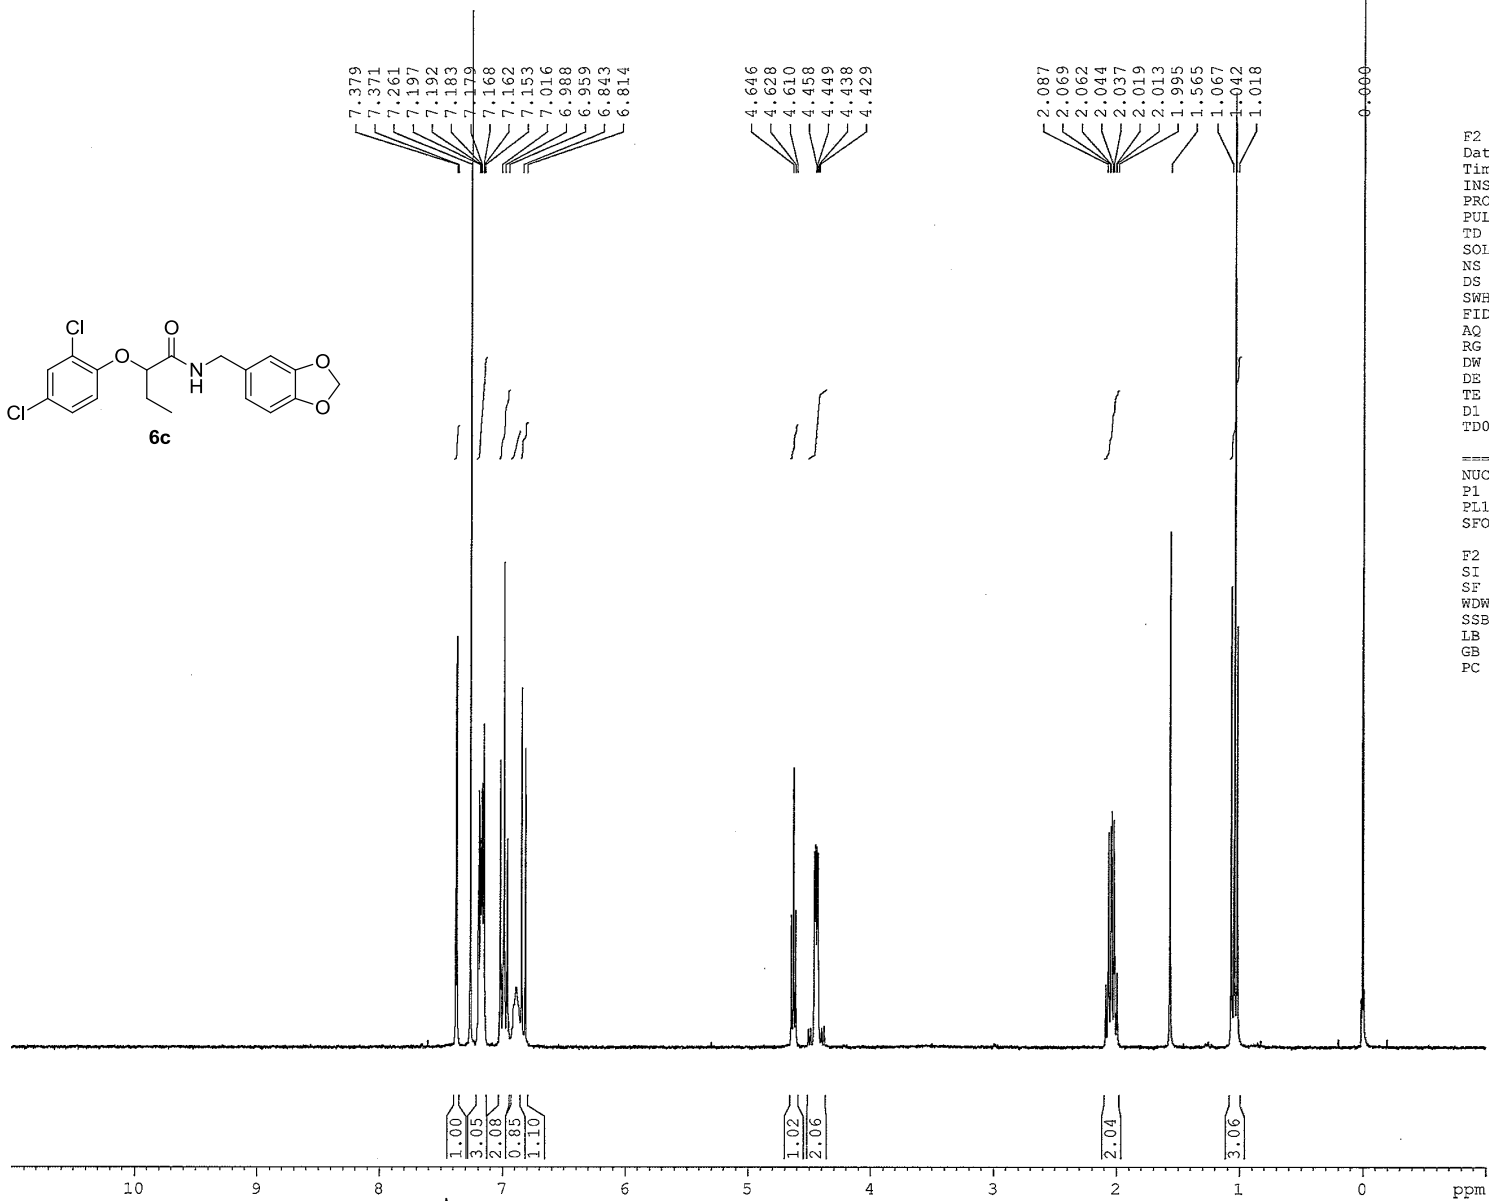

F2 - Acquisition Parameters  
 Date\_ 20100720  
 Time\_ 14.14  
 INSTRUM spect  
 PROBHD 5 mm BBO BB-1H  
 PULPROG zg30  
 TD 65536  
 SOLVENT CDCl3  
 NS 16  
 DS 2  
 SWH 6172.839 Hz  
 FIDRES 0.094190 Hz  
 AQ 5.3084660 sec  
 RG 2048  
 DW 81.000 usec  
 DE 6.50 usec  
 TE 298.2 K  
 D1 1.00000000 sec  
 TD0 1

===== CHANNEL f1 =====  
 NUC1 1H  
 P1 10.00 usec  
 PL1 9.20 dB  
 SFO1 299.5718500 MHz

F2 - Processing parameters  
 SI 32768  
 SF 299.5700028 MHz  
 WDW EM  
 SSB 0  
 LB 0.30 Hz  
 GB 0  
 PC 1.00

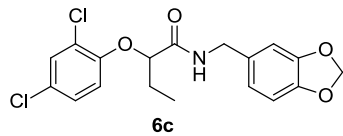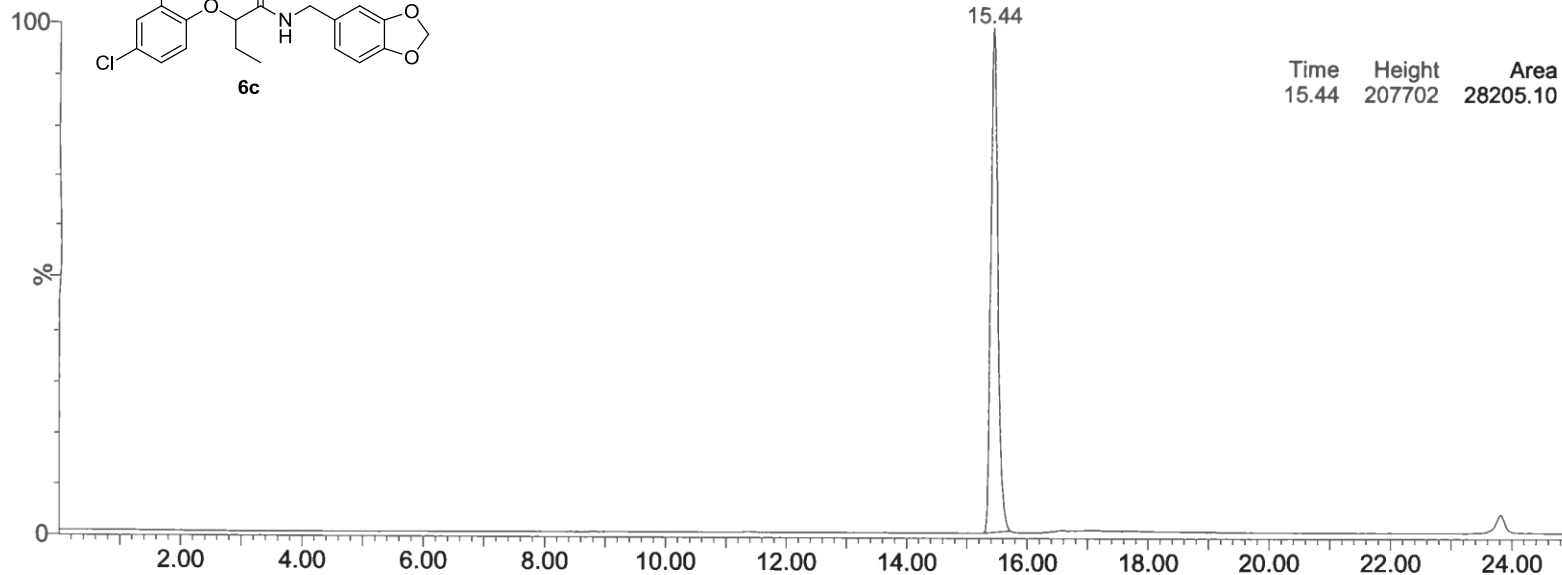

ELSD  
An2  
2.10e5  
Area%

| Time  | Height | Area     | Area%  |
|-------|--------|----------|--------|
| 15.44 | 207702 | 28205.10 | 100.00 |

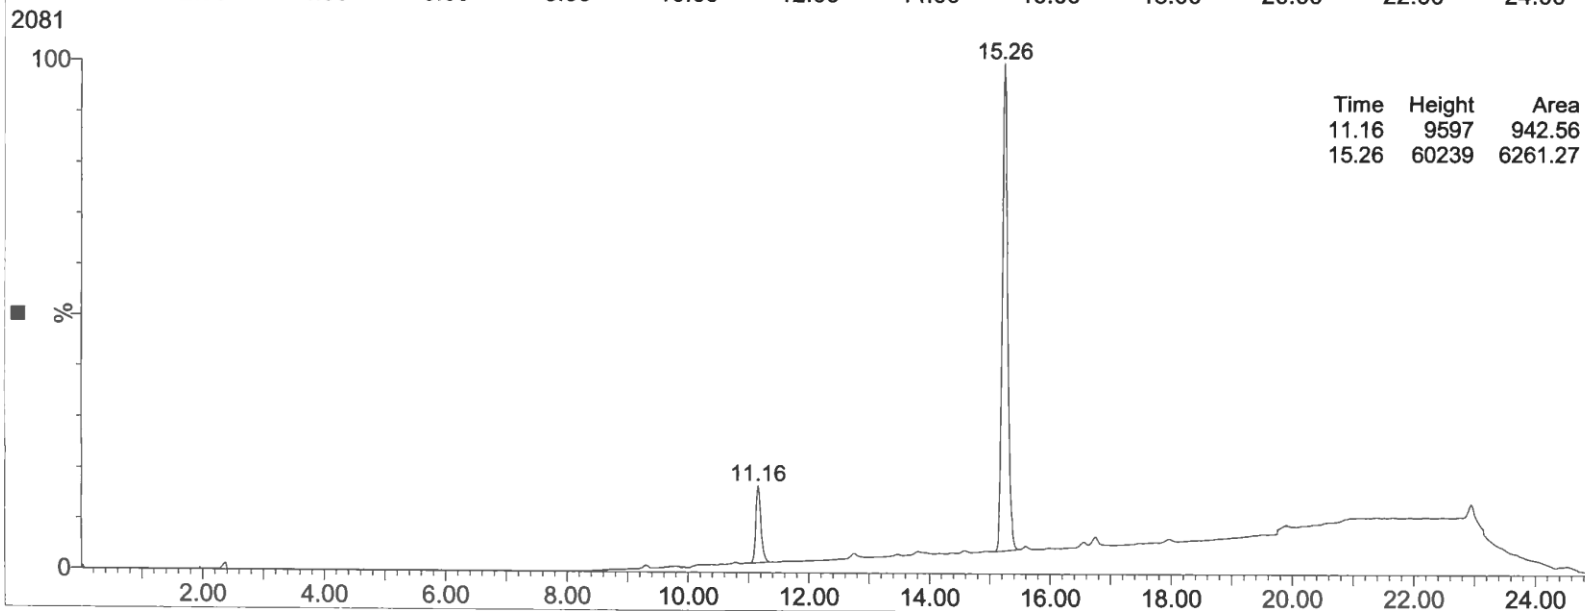

UV  
An1  
6.30e4  
Area%

| Time  | Height | Area    | Area% |
|-------|--------|---------|-------|
| 11.16 | 9597   | 942.56  | 13.08 |
| 15.26 | 60239  | 6261.27 | 86.92 |

1: Scan ES+  
3.89e7

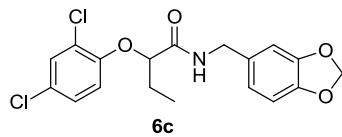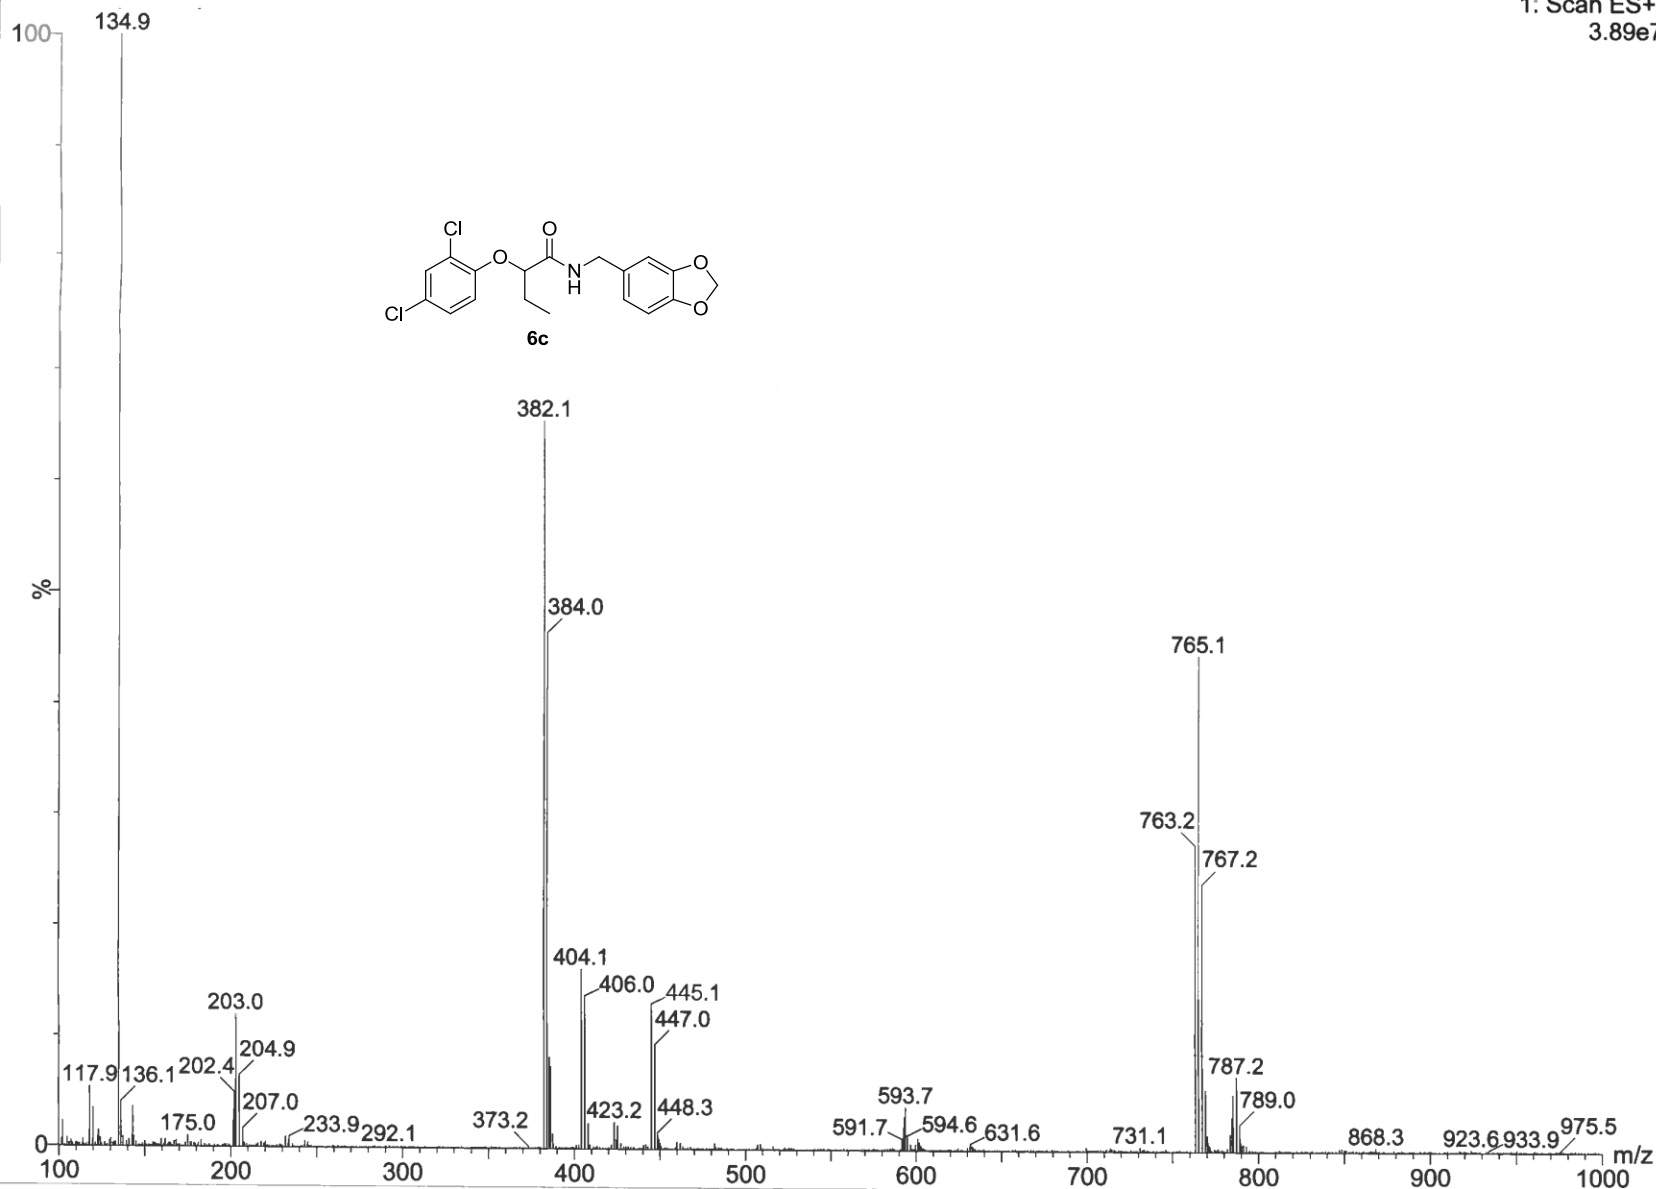

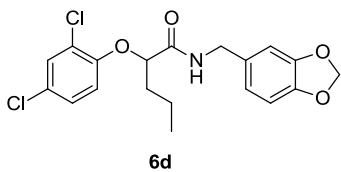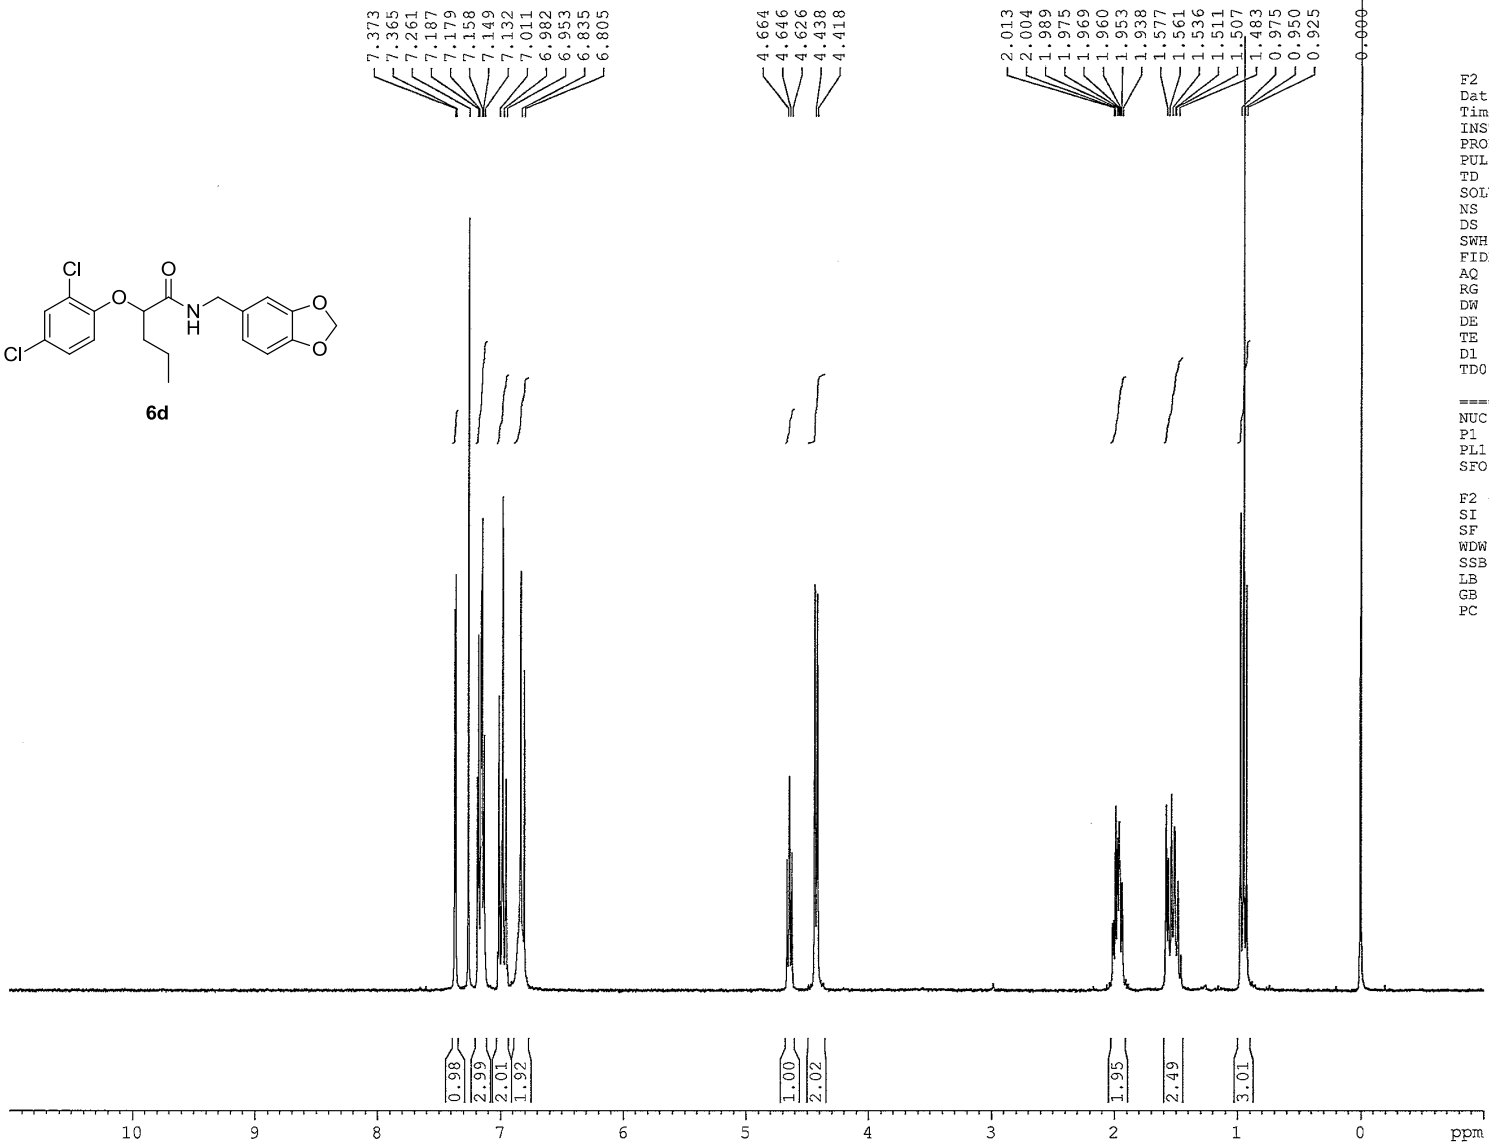

7.373  
7.365  
7.261  
7.187  
7.179  
7.158  
7.149  
7.132  
7.011  
6.982  
6.953  
6.835  
6.805

4.664  
4.646  
4.626  
4.438  
4.418

2.013  
2.004  
1.989  
1.975  
1.969  
1.960  
1.953  
1.938  
1.577  
1.561  
1.536  
1.511  
1.507  
1.483  
0.975  
0.950  
0.925

0.000

F2 - Acquisition Parameters  
 Date\_ 20100721  
 Time\_ 14.45  
 INSTRUM spect  
 PROBHD 5 mm BBO BB-1H  
 PULPROG zg30  
 TD 65536  
 SOLVENT CDCl3  
 NS 16  
 DS 2  
 SWH 6172.839 Hz  
 FIDRES 0.094190 Hz  
 AQ 5.3084660 sec  
 RG 1625.5  
 DW 81.000 usec  
 DE 6.50 usec  
 TE 298.2 K  
 DL 1.00000000 sec  
 TDO 1

===== CHANNEL f1 =====  
 NUC1 1H  
 P1 10.00 usec  
 PL1 9.20 dB  
 SFO1 299.5718500 MHz

F2 - Processing parameters  
 SI 32768  
 SF 299.5700028 MHz  
 WDW EM  
 SSB 0  
 LB 0.30 Hz  
 GB 0  
 PC 1.00

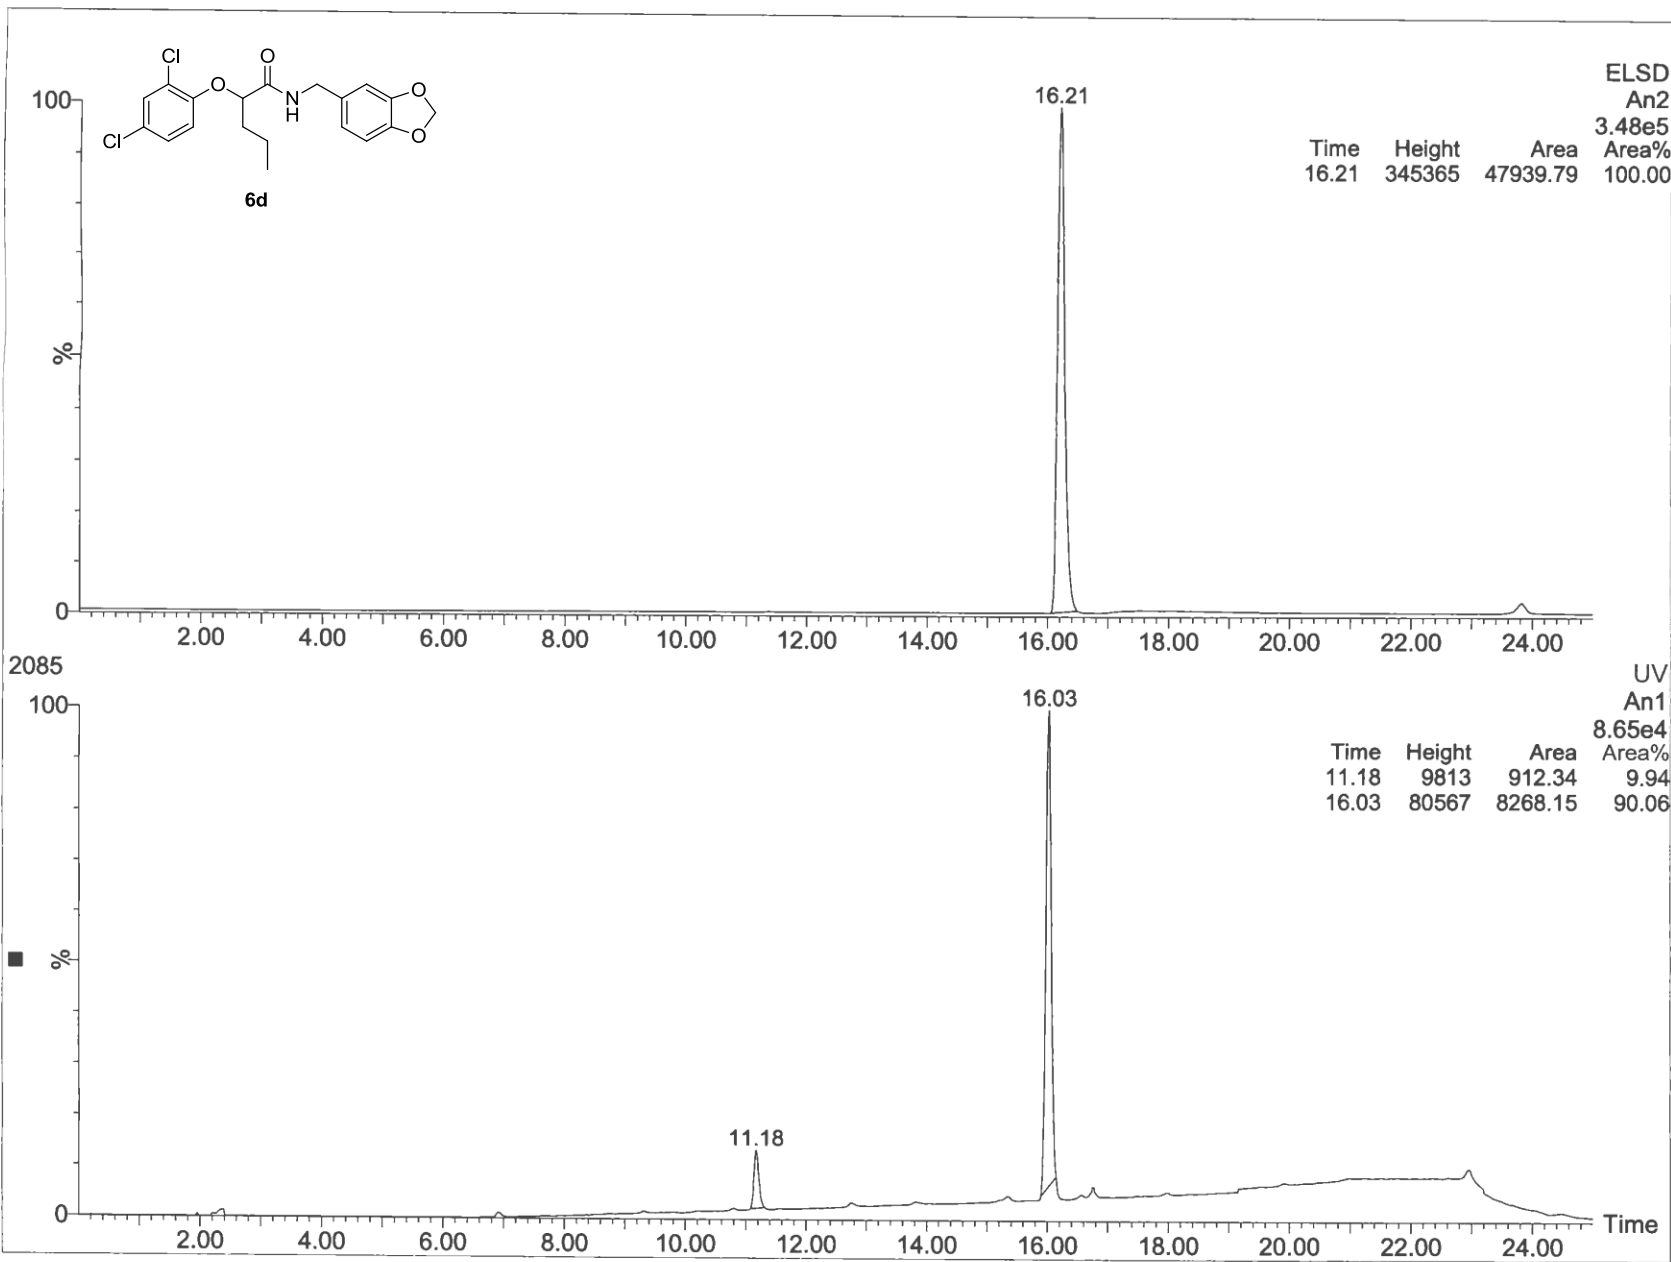

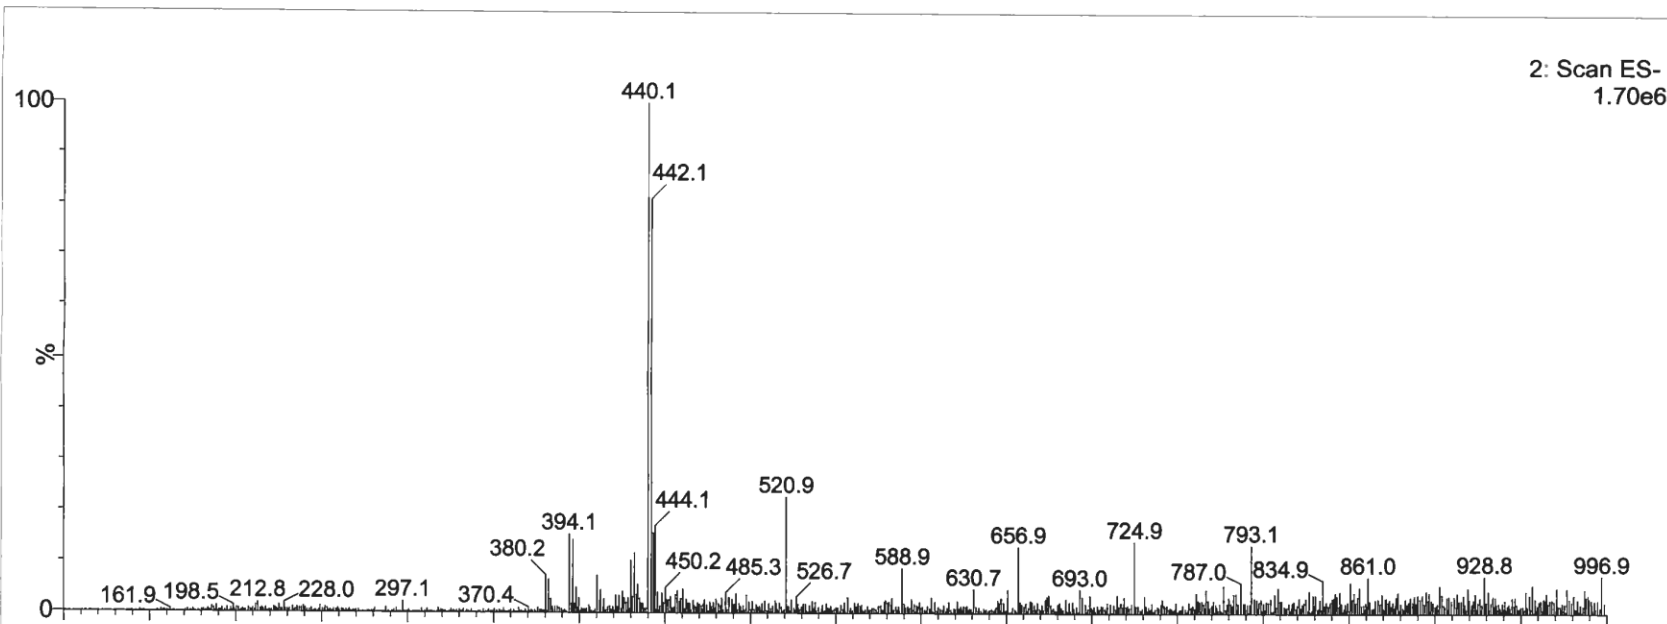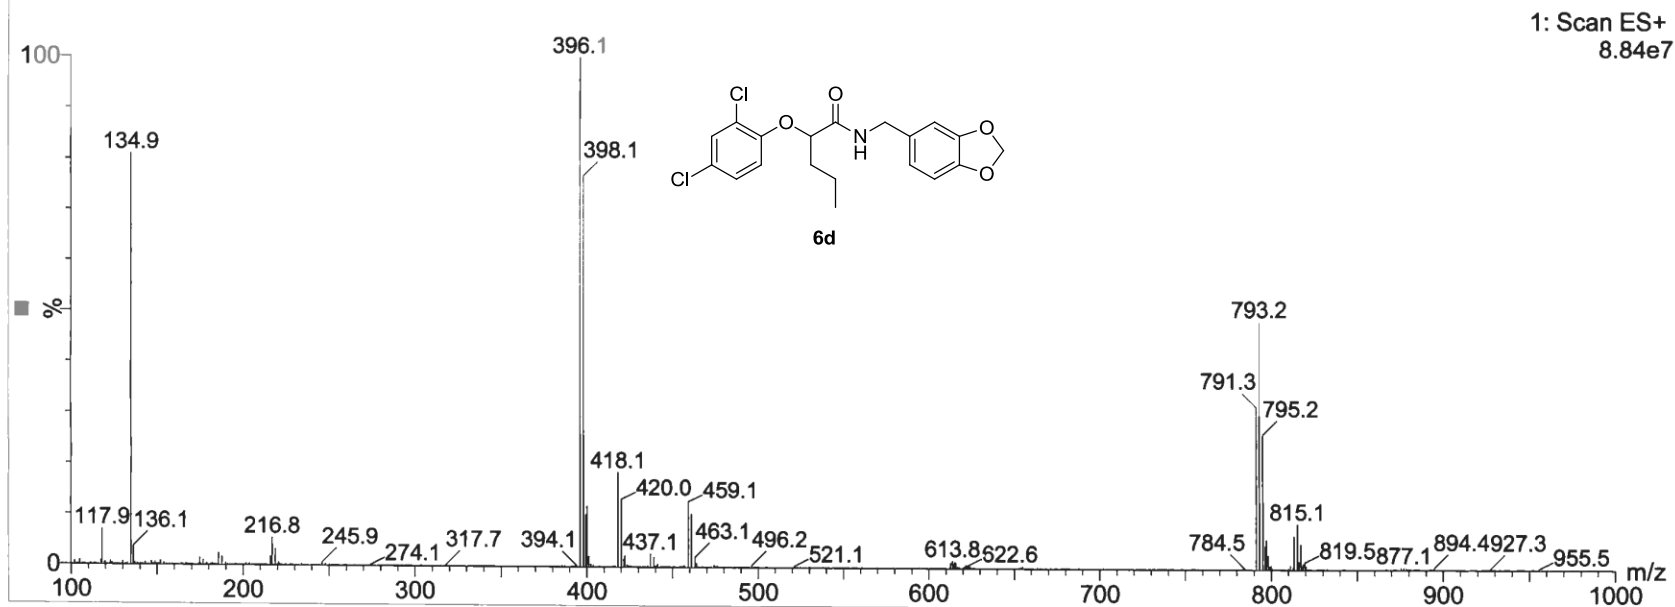

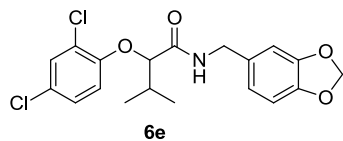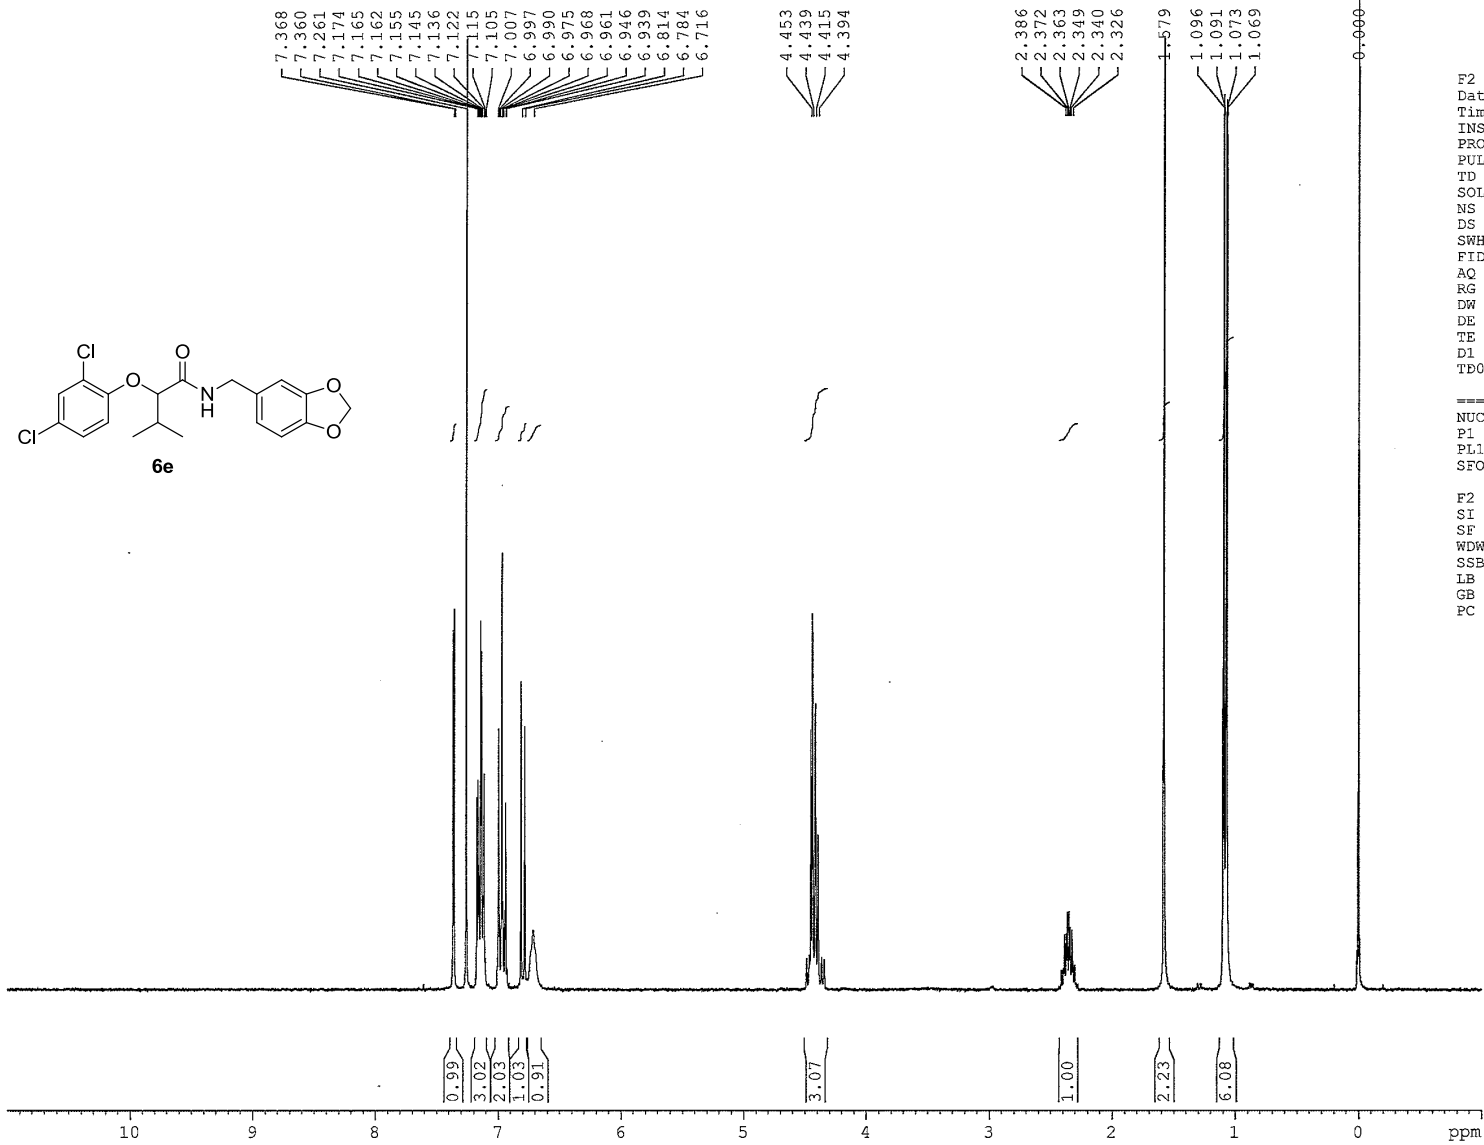

F2 - Acquisition Parameters  
 Date\_ 20100909  
 Time\_ 15.04  
 INSTRUM spect  
 PROBHD 5 mm BBO BB-1H  
 PULPROG zg30  
 TD 65536  
 SOLVENT CDCl3  
 NS 16  
 DS 2  
 SWH 6172.839 Hz  
 FIDRES 0.094190 Hz  
 AQ 5.3084660 sec  
 RG 2048  
 DW 81.000 usec  
 DE 6.50 usec  
 TE 298.2 K  
 D1 1.00000000 sec  
 TD0 1

----- CHANNEL f1 -----  
 NUC1 1H  
 P1 10.00 usec  
 PL1 9.20 dB  
 SFO1 299.5718500 MHz

F2 - Processing parameters  
 SI 32768  
 SF 299.5700028 MHz  
 WDW EM  
 SSB 0  
 LB 0.30 Hz  
 GB 0  
 PC 1.00

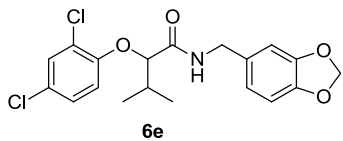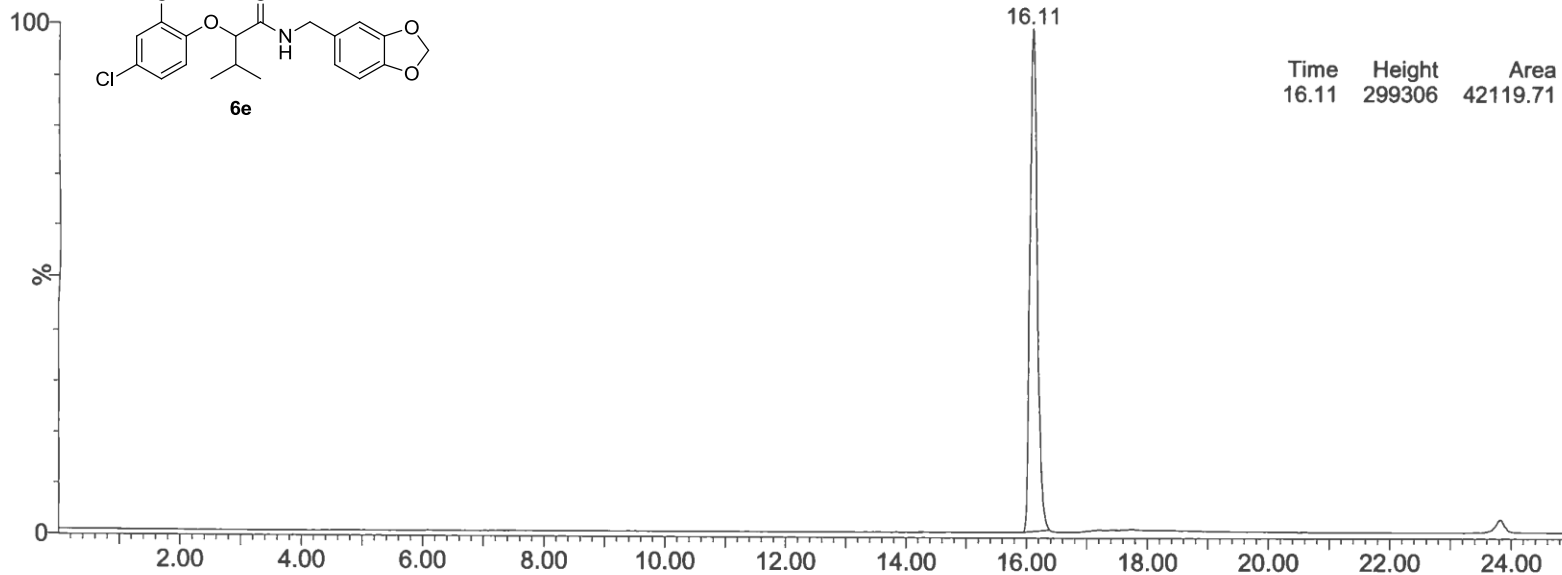

ELSD  
An2  
3.03e5

| Time  | Height | Area     | Area%  |
|-------|--------|----------|--------|
| 16.11 | 299306 | 42119.71 | 100.00 |

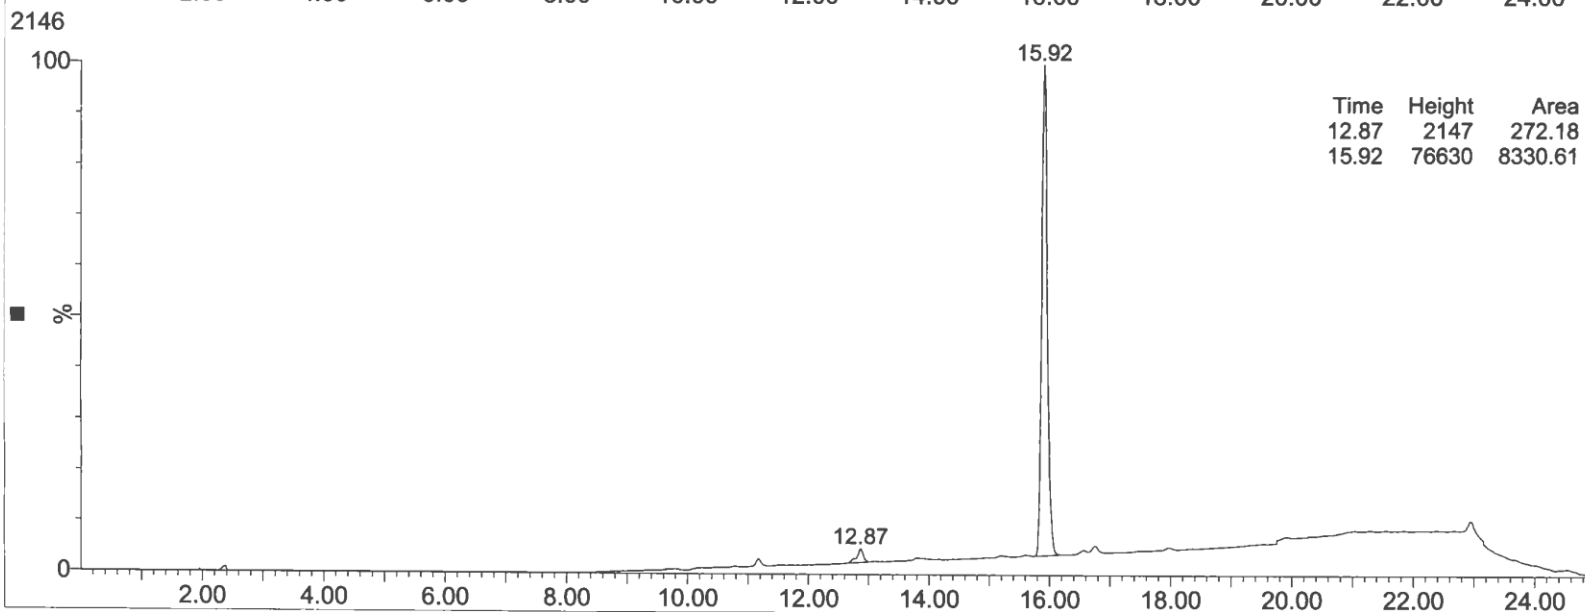

UV  
An1  
7.96e4

| Time  | Height | Area    | Area% |
|-------|--------|---------|-------|
| 12.87 | 2147   | 272.18  | 3.16  |
| 15.92 | 76630  | 8330.61 | 96.84 |



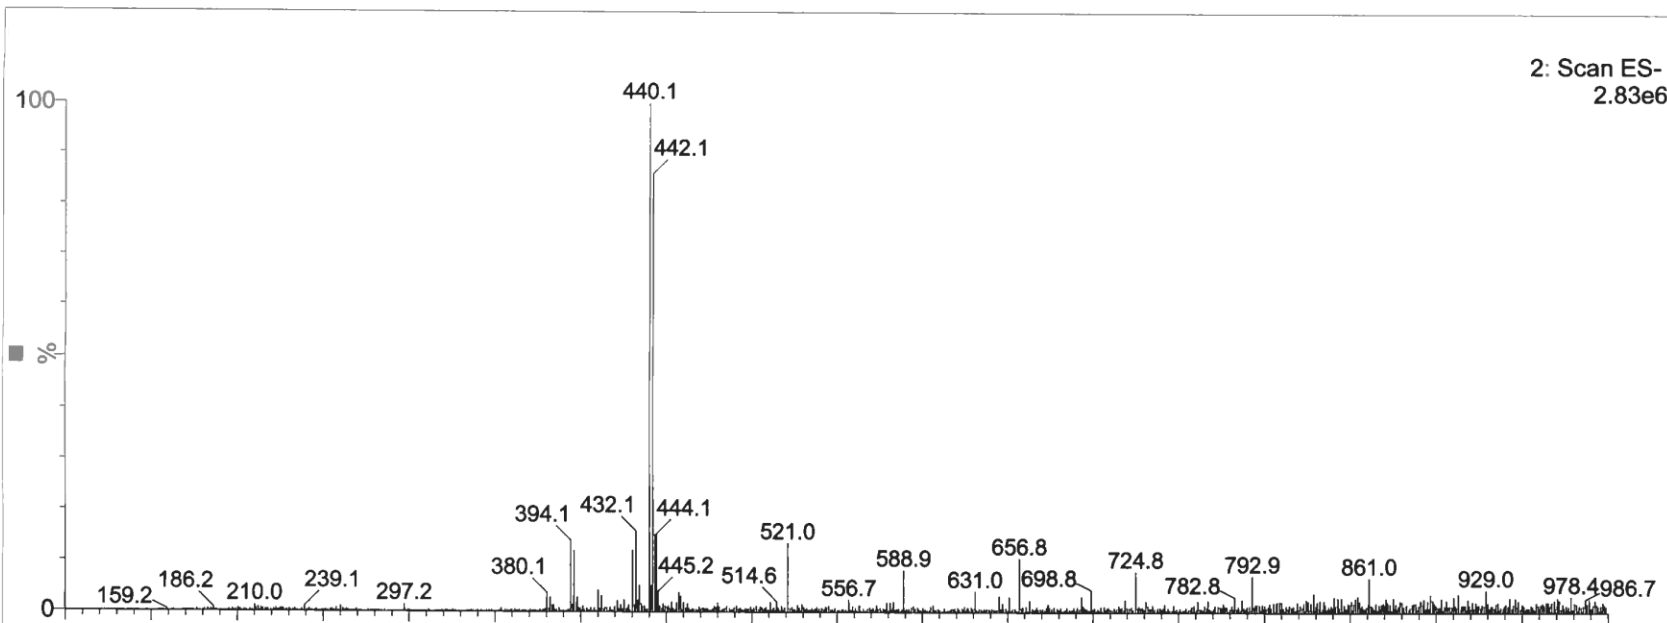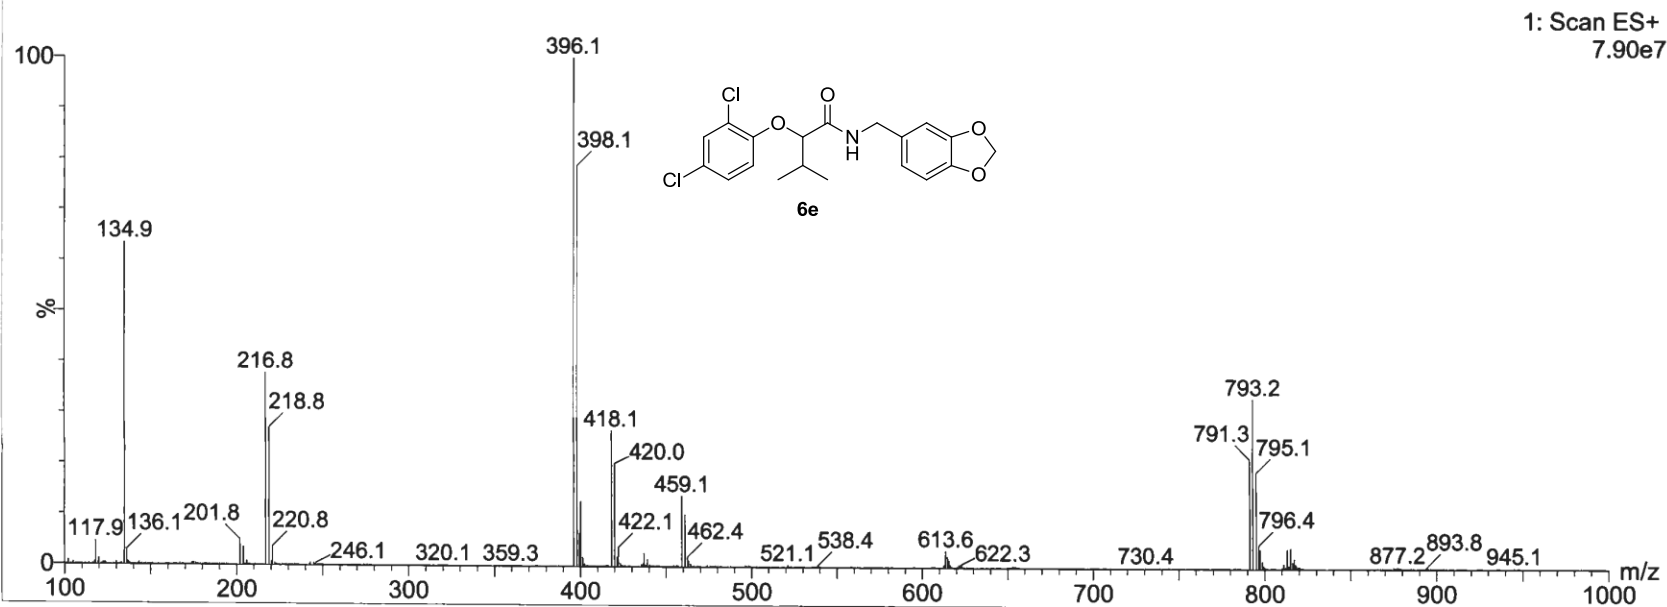

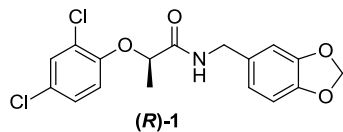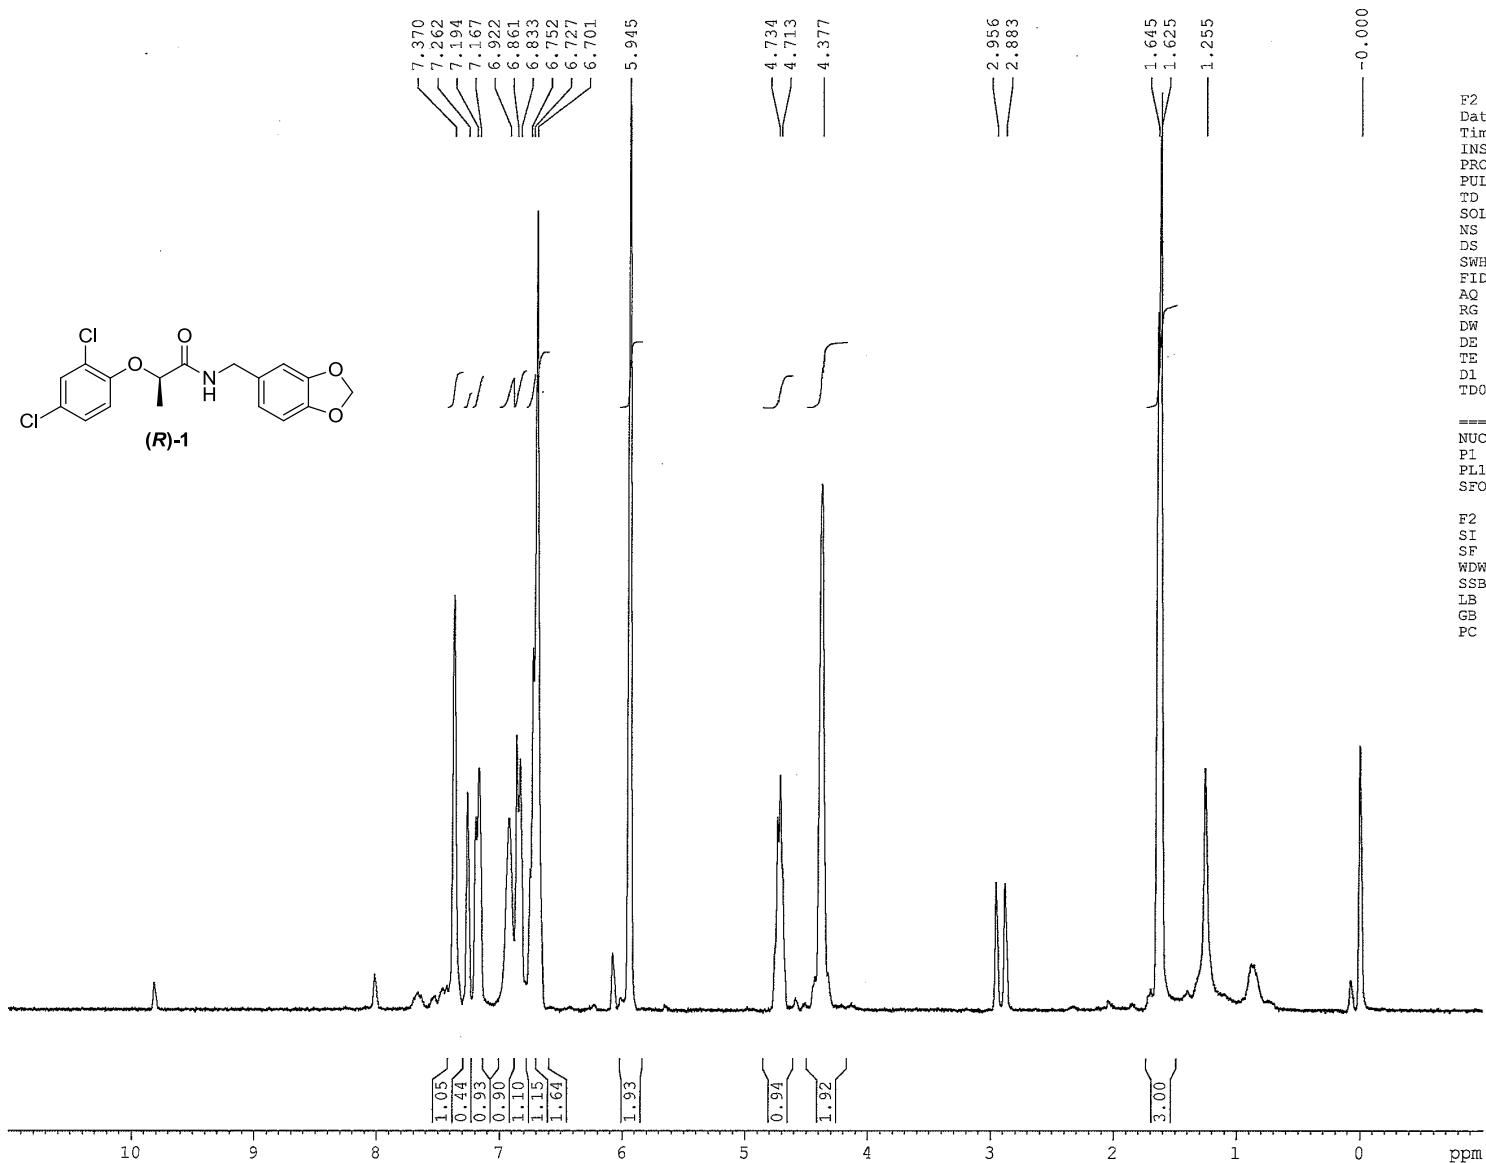

F2 - Acquisition Parameters  
 Date\_ 20090304  
 Time 11.57  
 INSTRUM spect  
 PROBHD 5 mm BBO BB-1H  
 PULPROG zg30  
 TD 65536  
 SOLVENT CDCl3  
 NS 16  
 DS 2  
 SWH 6172.839 Hz  
 FIDRES 0.094190 Hz  
 AQ 5.3084660 sec  
 RG 812.7  
 DW 81.000 usec  
 DE 6.50 usec  
 TE 298.2 K  
 D1 1.00000000 sec  
 TD0 1

===== CHANNEL f1 =====  
 NUC1 1H  
 P1 10.00 usec  
 PL1 9.20 dB  
 SFO1 299.6418504 MHz

F2 - Processing parameters  
 SI 32768  
 SF 299.6400081 MHz  
 WDW EM  
 SSB 0  
 LB 0.30 Hz  
 GB 0  
 PC 1.00

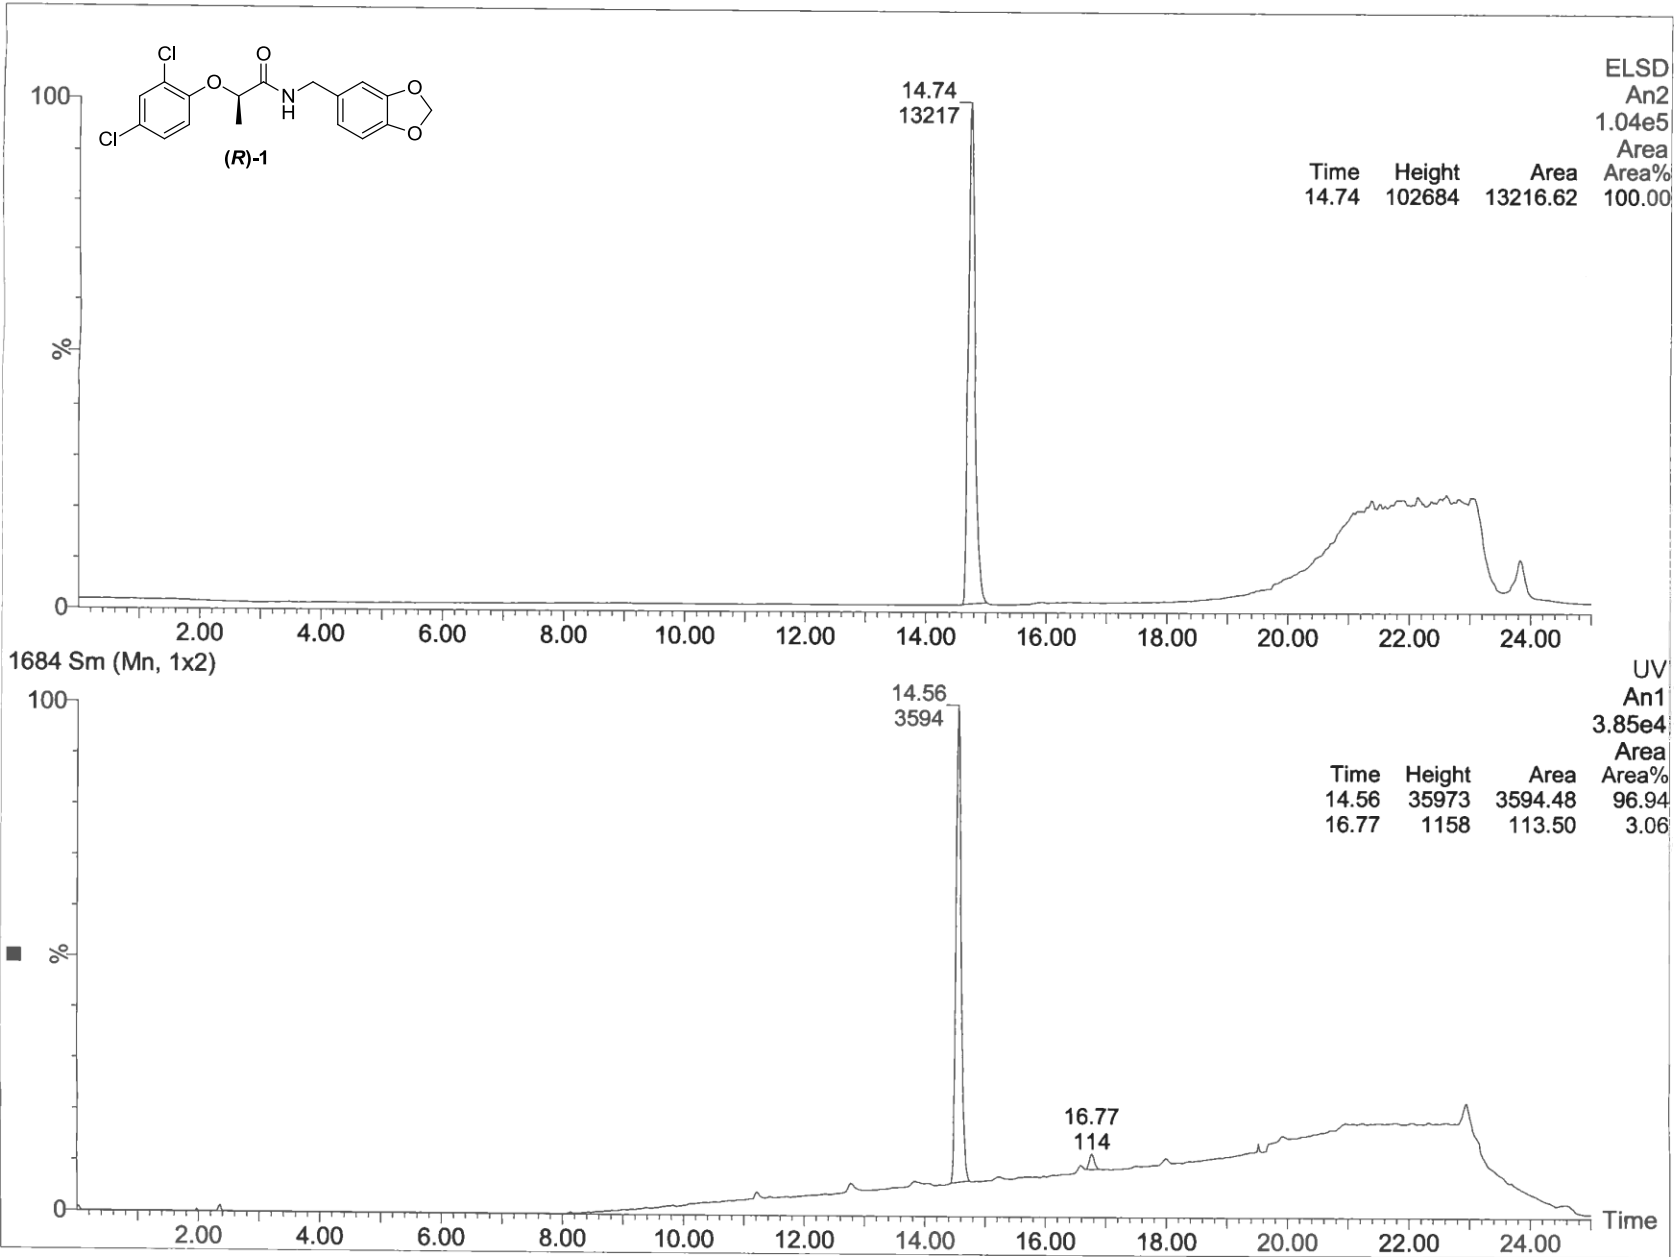

1: Scan ES+  
8.12e7

100  
134.8

%

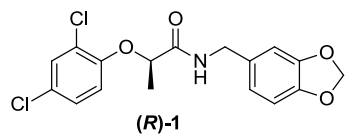

117.8 136.1 143.0 188.9 217.7 287.4 324.1 368.0 370.0 390.0 409.0 431.0 436.1 492.9 508.8 571.7 580.4 613.4 703.1 735.1 737.0 739.0 759.0 761.0 820.8 836.9 941.0 952.4 m/z

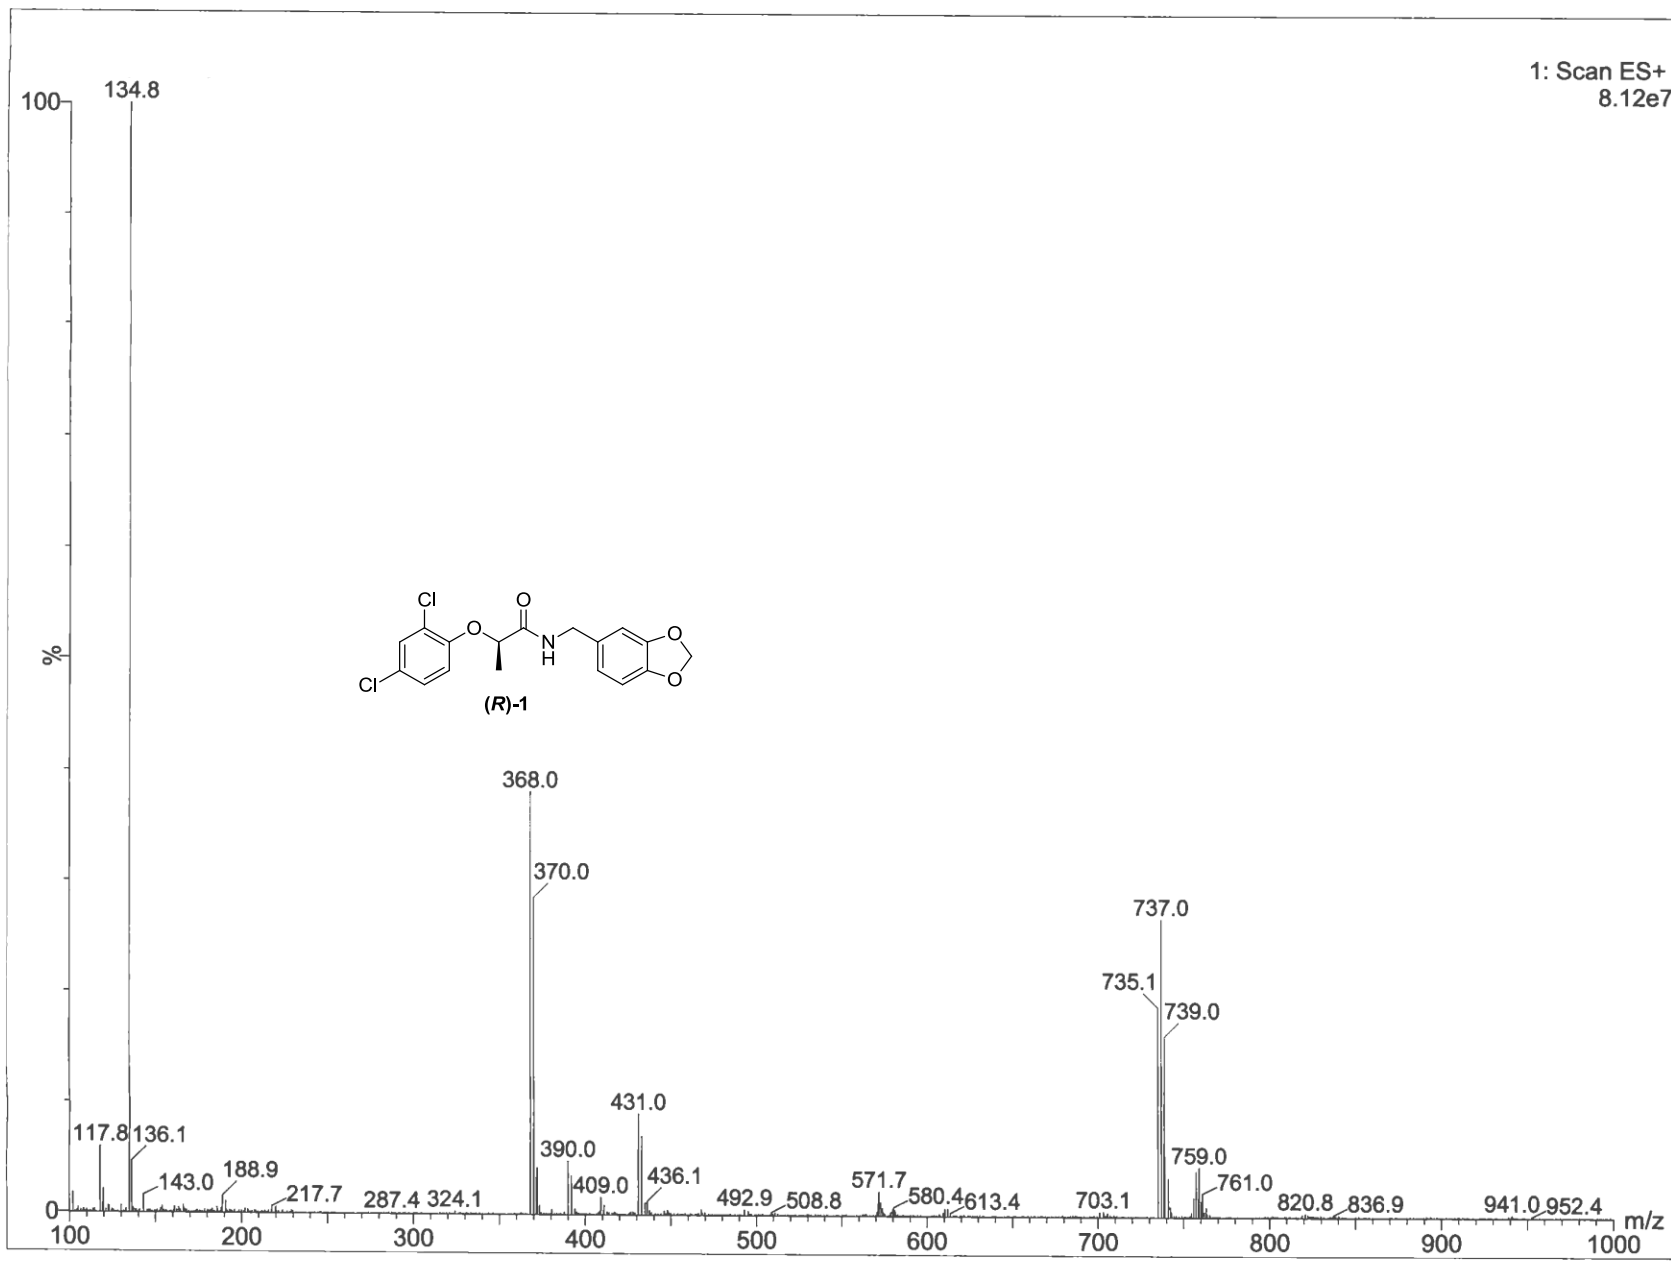

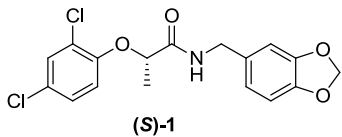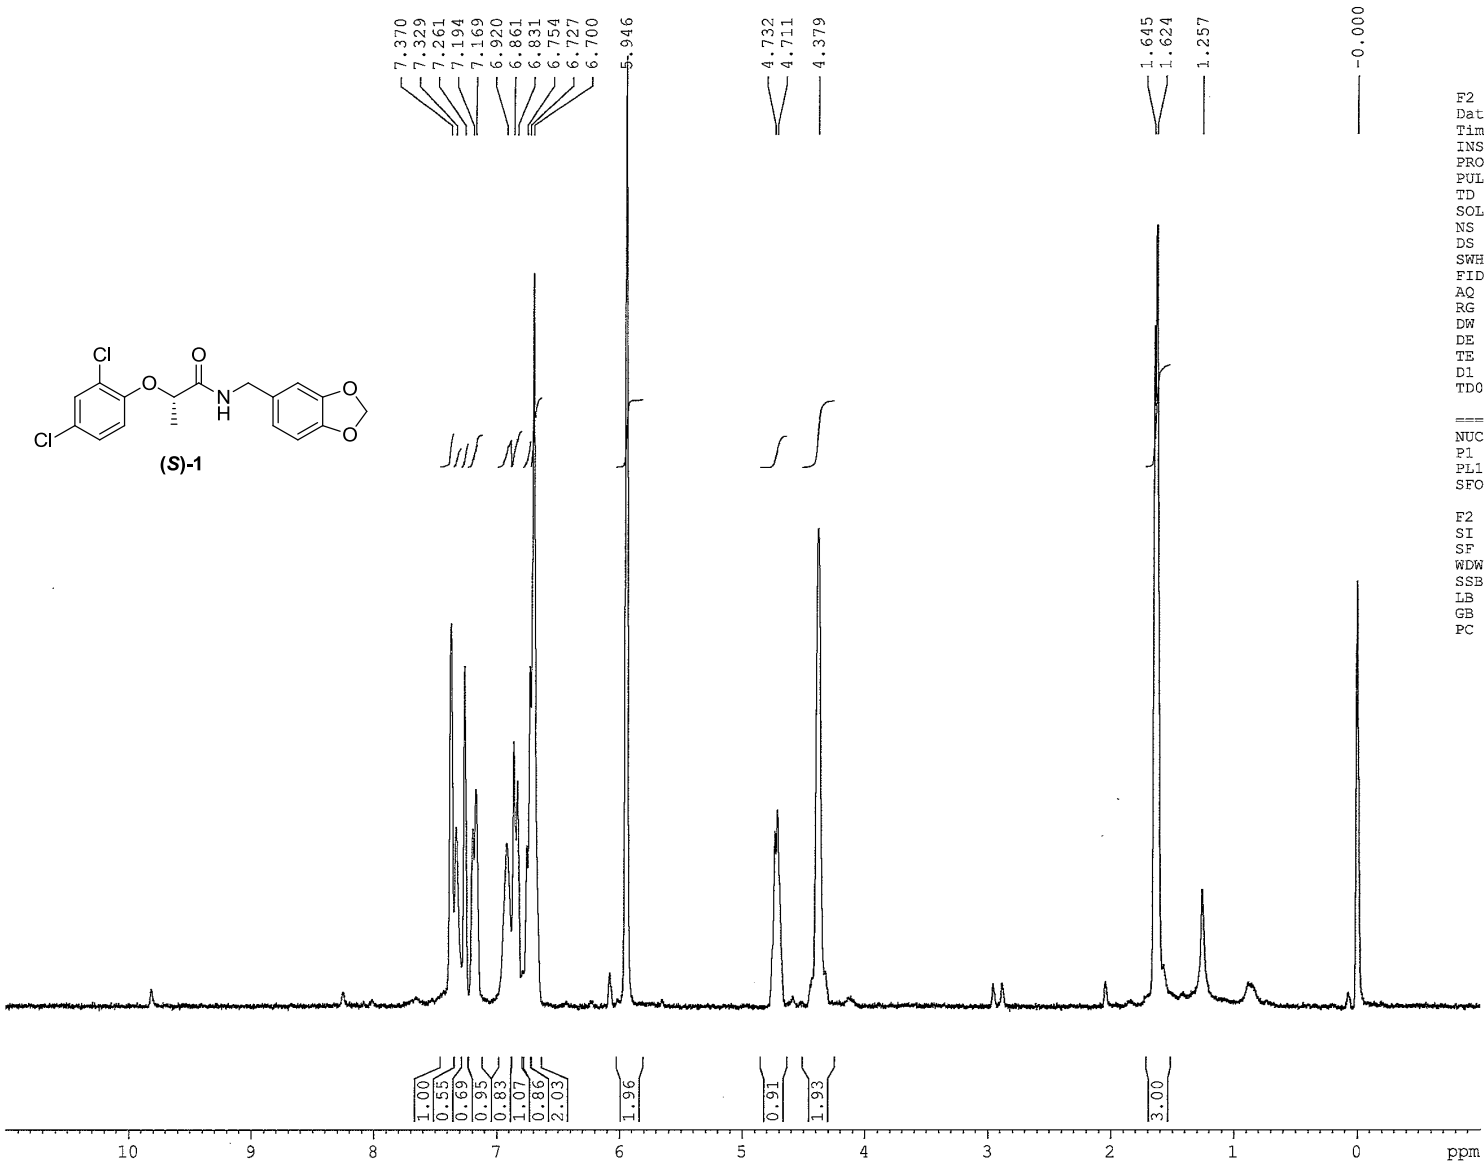

F2 - Acquisition Parameters  
 Date\_ 20090304  
 Time\_ 12.05  
 INSTRUM spect  
 PROBHD 5 mm BBO BB-1H  
 PULPROG zg30  
 TD 65536  
 SOLVENT CDCl3  
 NS 16  
 DS 2  
 SWH 6172.839 Hz  
 FIDRES 0.094190 Hz  
 AQ 5.3084660 sec  
 RG 1149.4  
 DW 81.000 usec  
 DE 6.50 usec  
 TE 298.2 K  
 D1 1.00000000 sec  
 TDO 1

===== CHANNEL f1 =====  
 NUC1 1H  
 P1 10.00 usec  
 PL1 9.20 dB  
 SFO1 299.6418504 MHz

F2 - Processing parameters  
 SI 32768  
 SF 299.6400083 MHz  
 WDW EM  
 SSB 0  
 LB 0.30 Hz  
 GB 0  
 PC 1.00

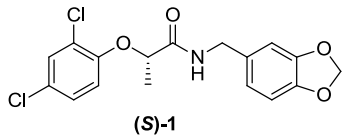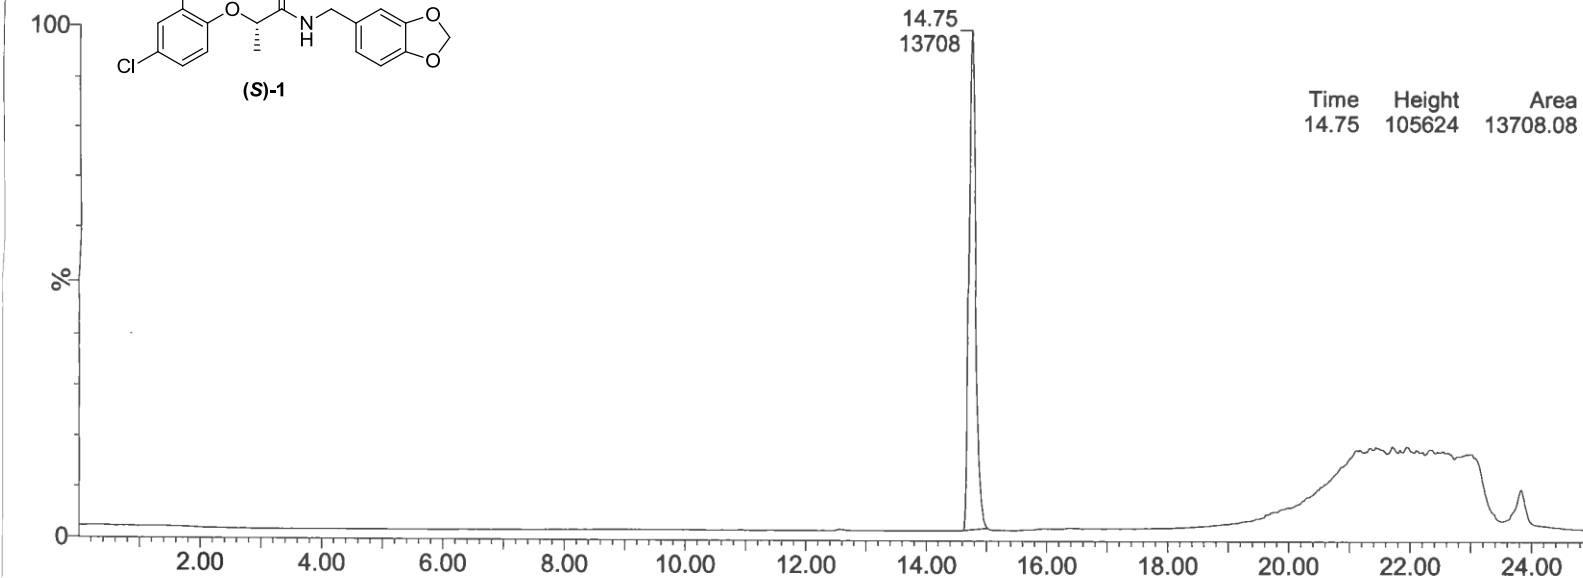

ELSD  
An2  
1.08e5  
Area  
Area%

1686 Sm (Mn, 1x2)

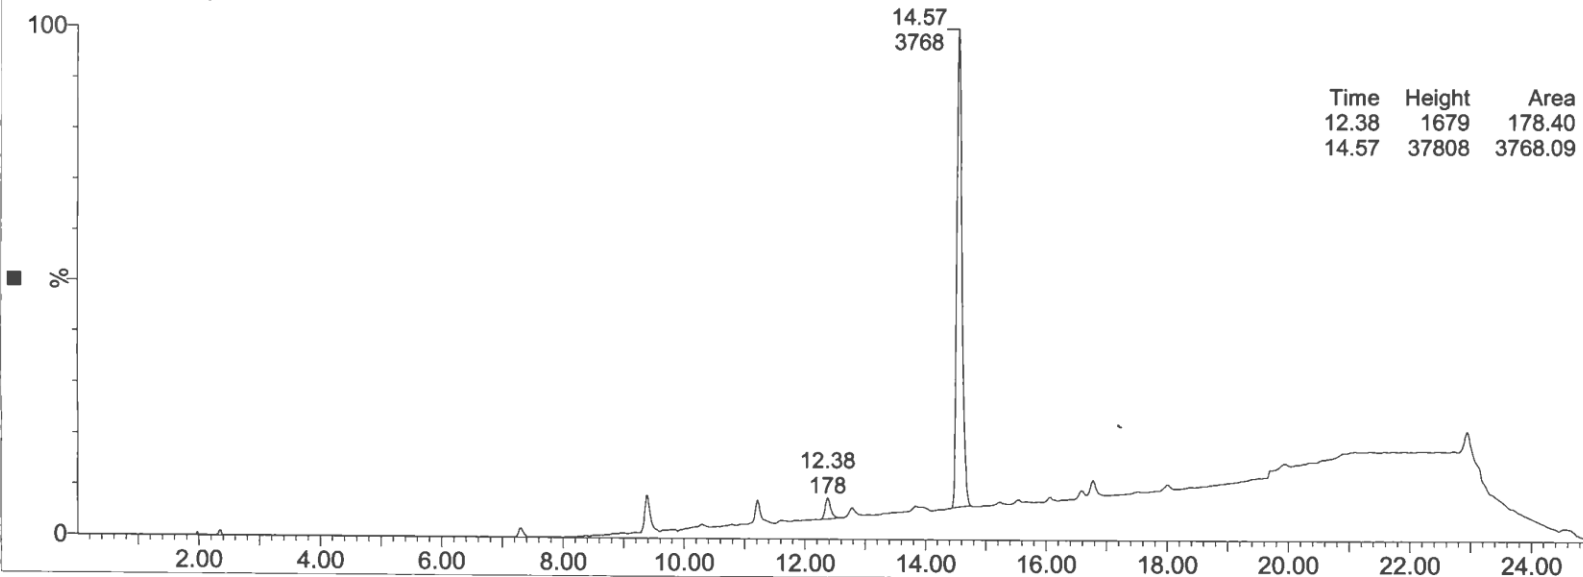

UV  
An1  
4.04e4  
Area  
Area%

1: Scan ES+  
7.89e7

100  
134.9

%

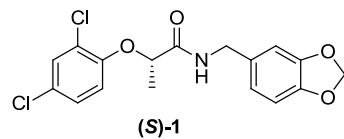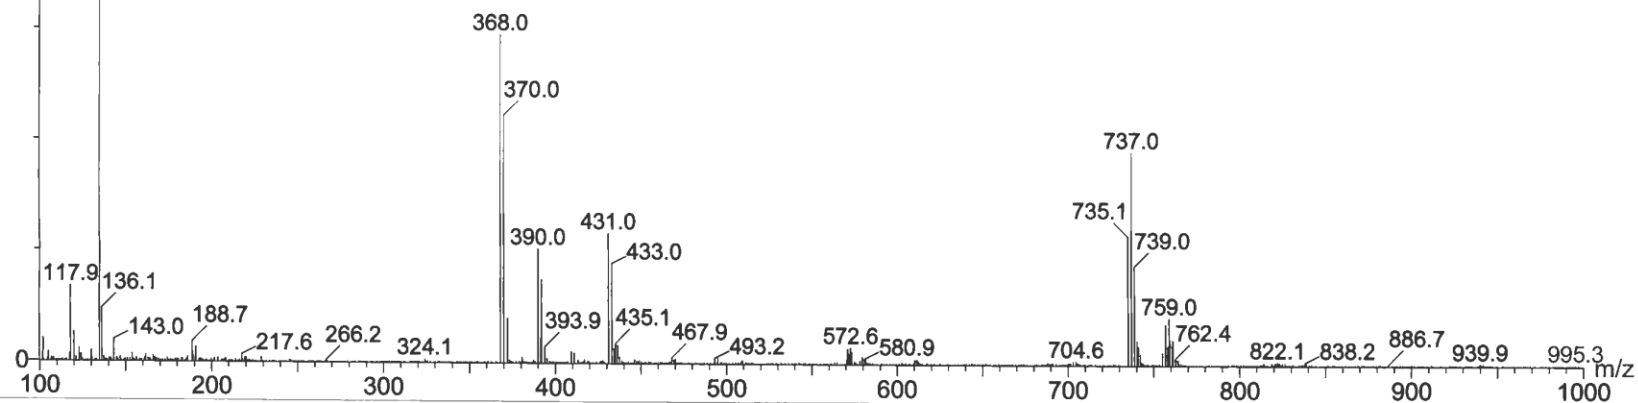

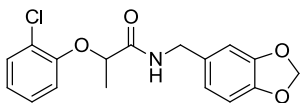

12a

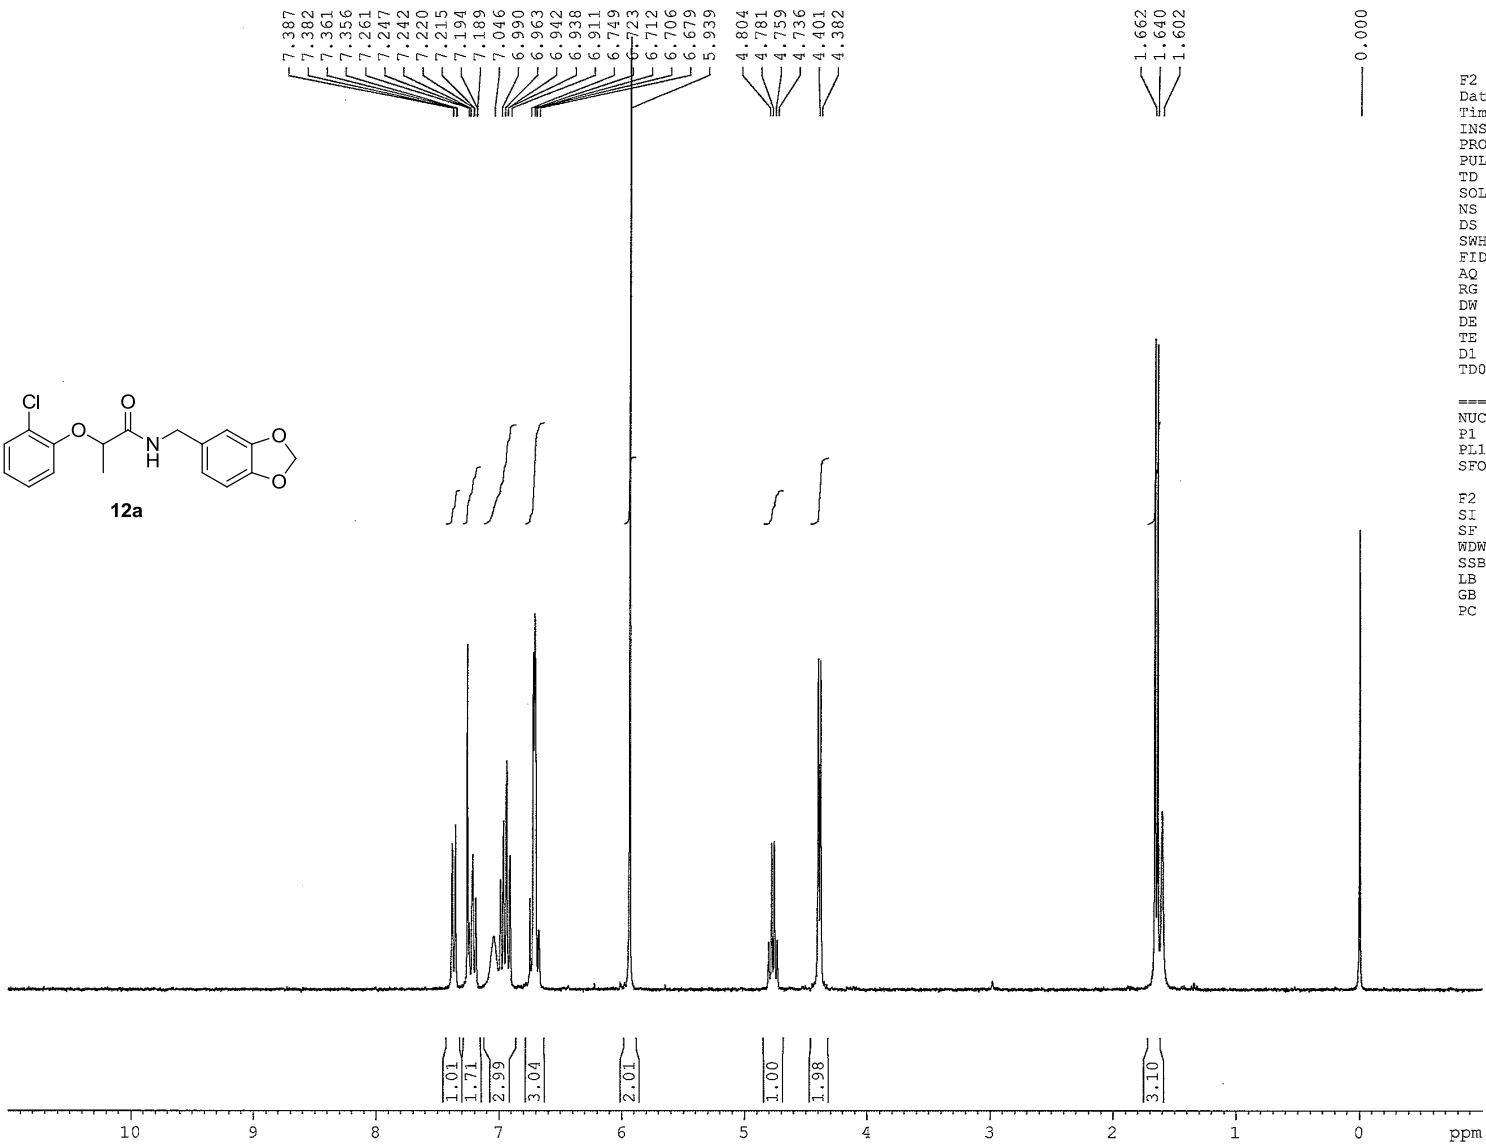

F2 - Acquisition Parameters  
 Date\_ 20131010  
 Time 13.29  
 INSTRUM spect  
 PROBHD 5 mm BBO BB-1H  
 PULPROG zg30  
 TD 65536  
 SOLVENT CDCl3  
 NS 16  
 DS 2  
 SWH 6172.839 Hz  
 FIDRES 0.094190 Hz  
 AQ 5.3084660 sec  
 RG 2298.8  
 DW 81.000 usec  
 DE 6.50 usec  
 TE 298.2 K  
 D1 1.00000000 sec  
 TDO 1

===== CHANNEL f1 =====  
 NUC1 1H  
 P1 10.00 usec  
 PL1 3.00 dB  
 SFO1 299.4518492 MHz

F2 - Processing parameters  
 SI 32768  
 SF 299.4500085 MHz  
 WDW EM  
 SSB 0  
 LB 0.30 Hz  
 GB 0  
 PC 1.00



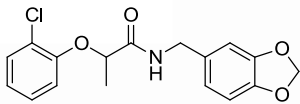

12a

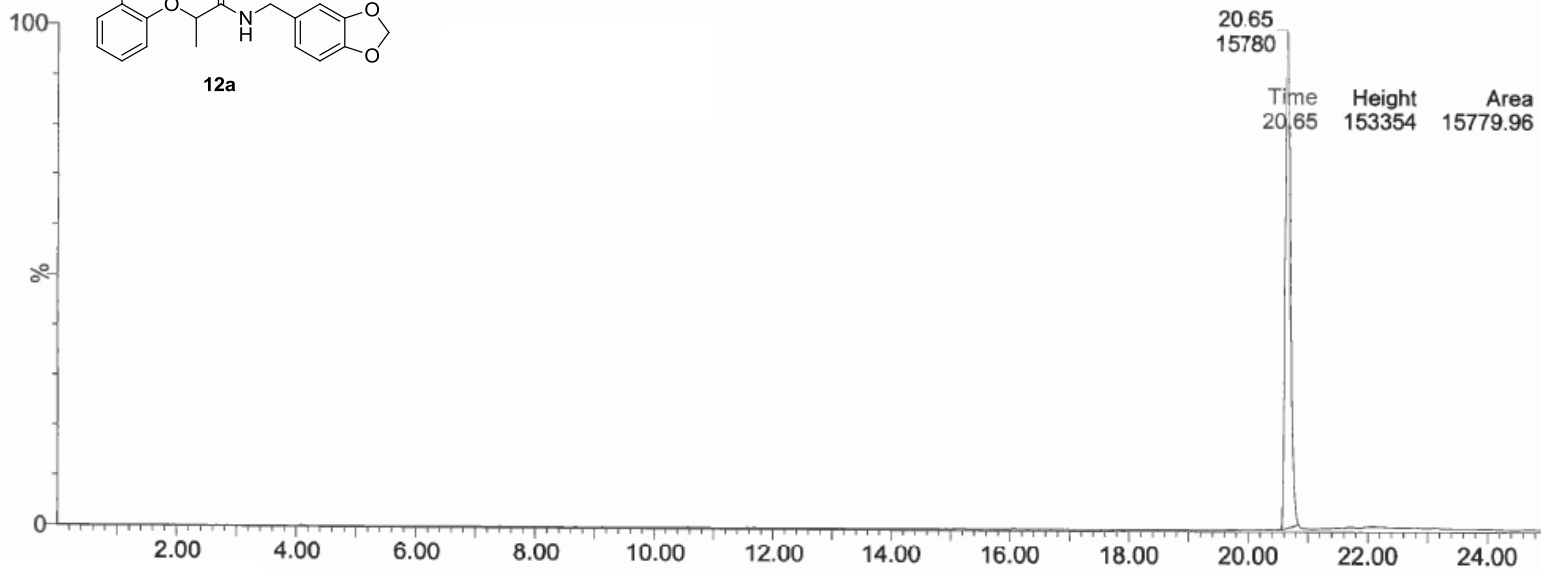

20.65  
15780

| Time  | Height | Area     | Area%  |
|-------|--------|----------|--------|
| 20.65 | 153354 | 15779.96 | 100.00 |

ELSD  
An2  
1.54e5  
Area  
Area%

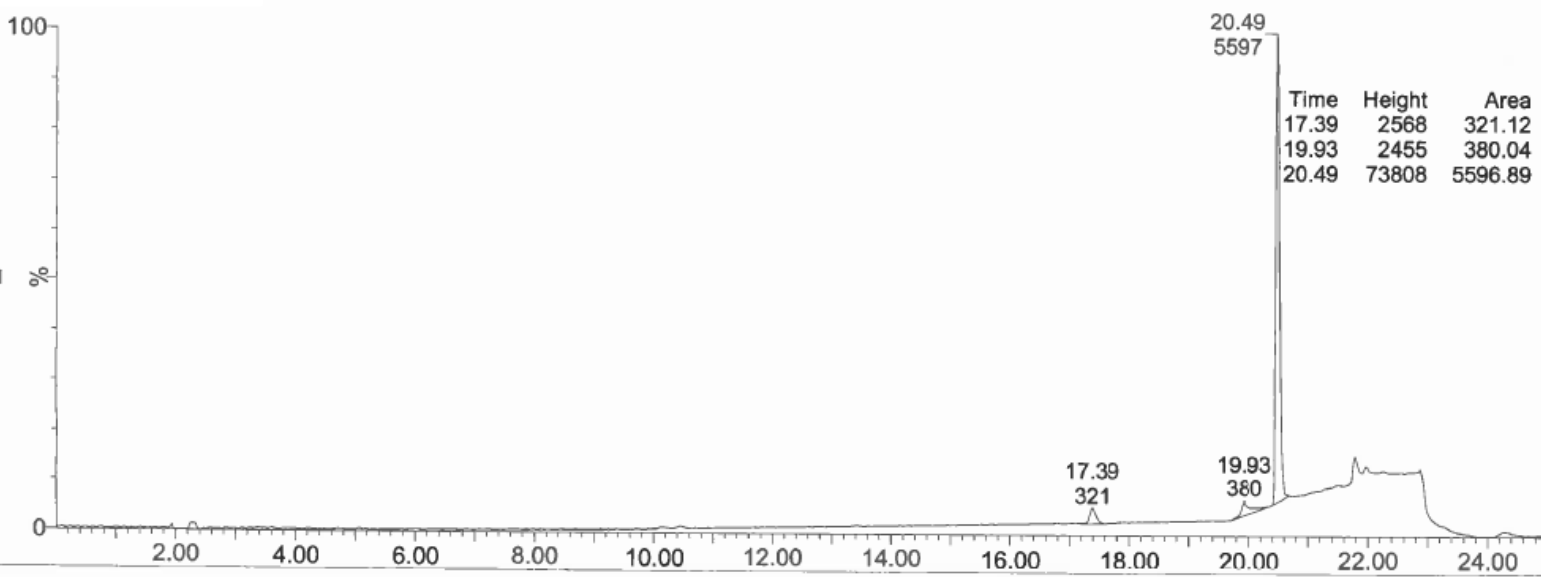

20.49  
5597

| Time  | Height | Area    | Area% |
|-------|--------|---------|-------|
| 17.39 | 2568   | 321.12  | 5.10  |
| 19.93 | 2455   | 380.04  | 6.03  |
| 20.49 | 73808  | 5596.89 | 88.87 |

UV  
An1  
7.91e4  
Area  
Area%

1: Scan ES+  
1.50e8

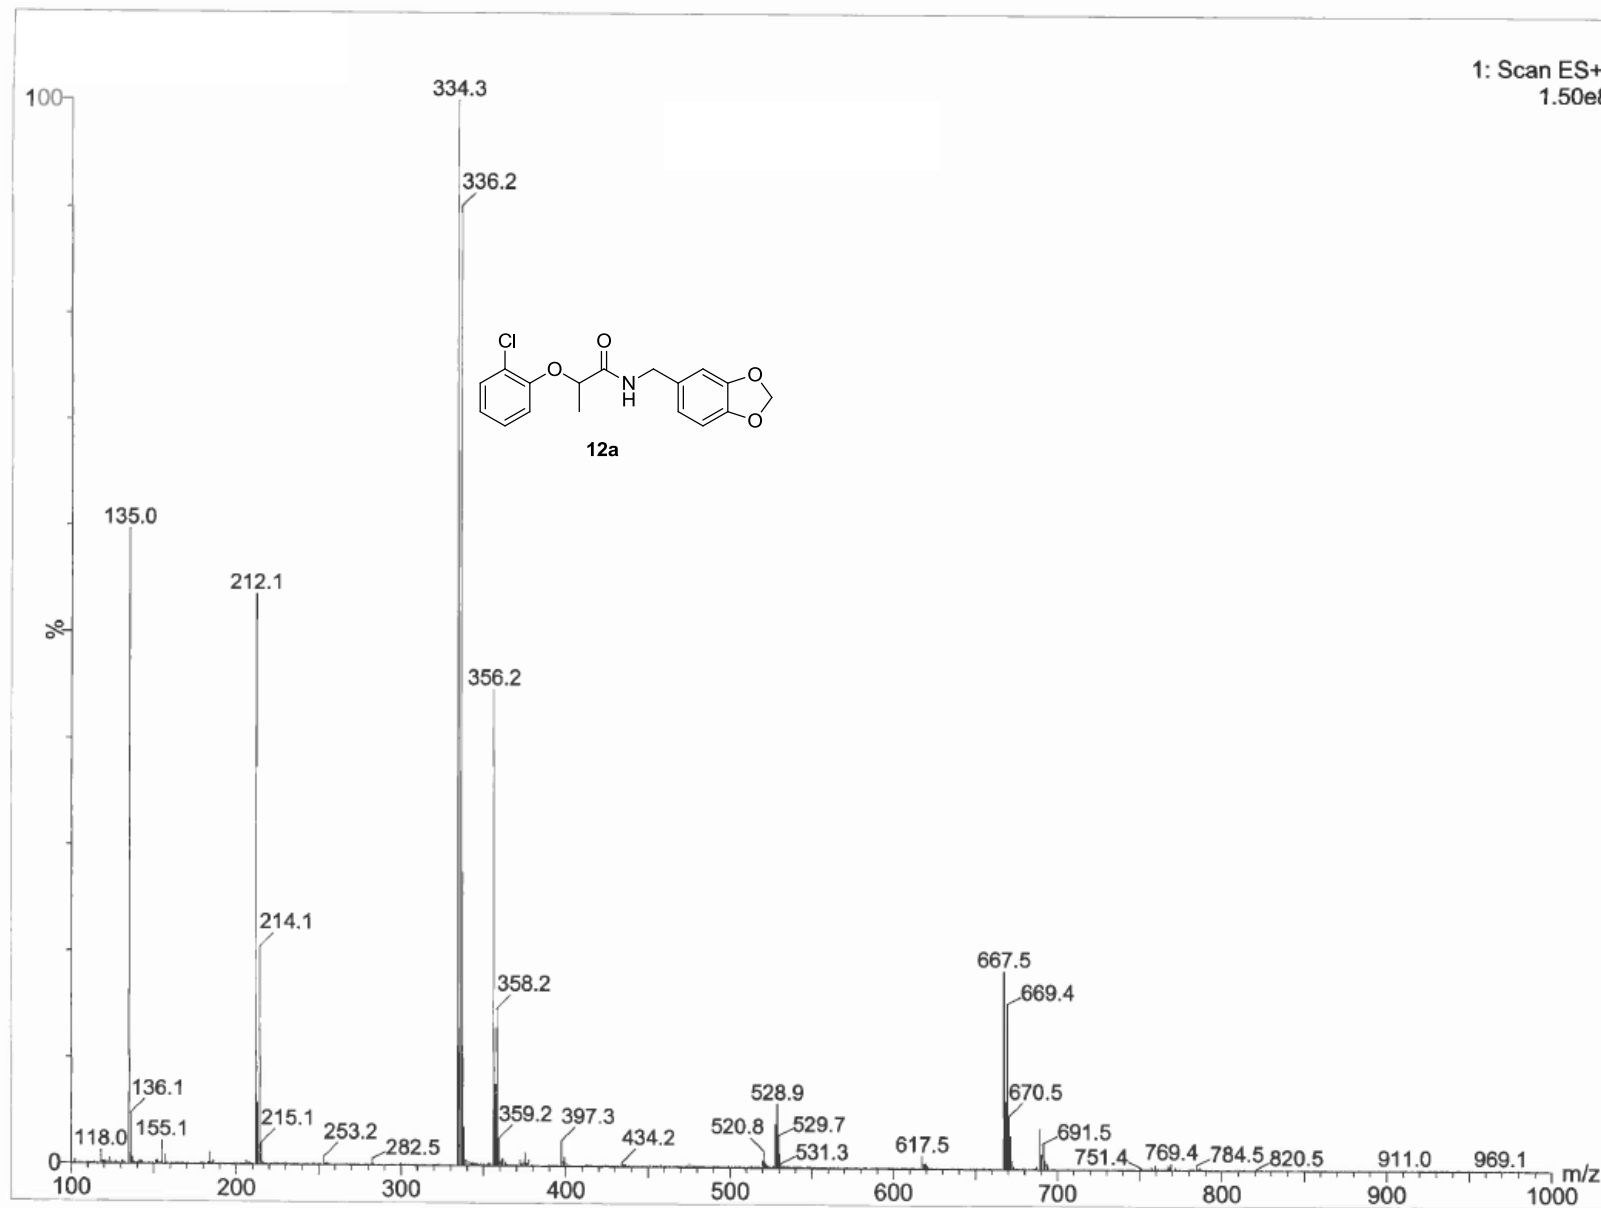

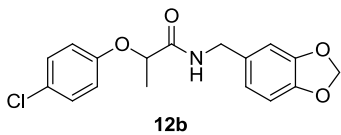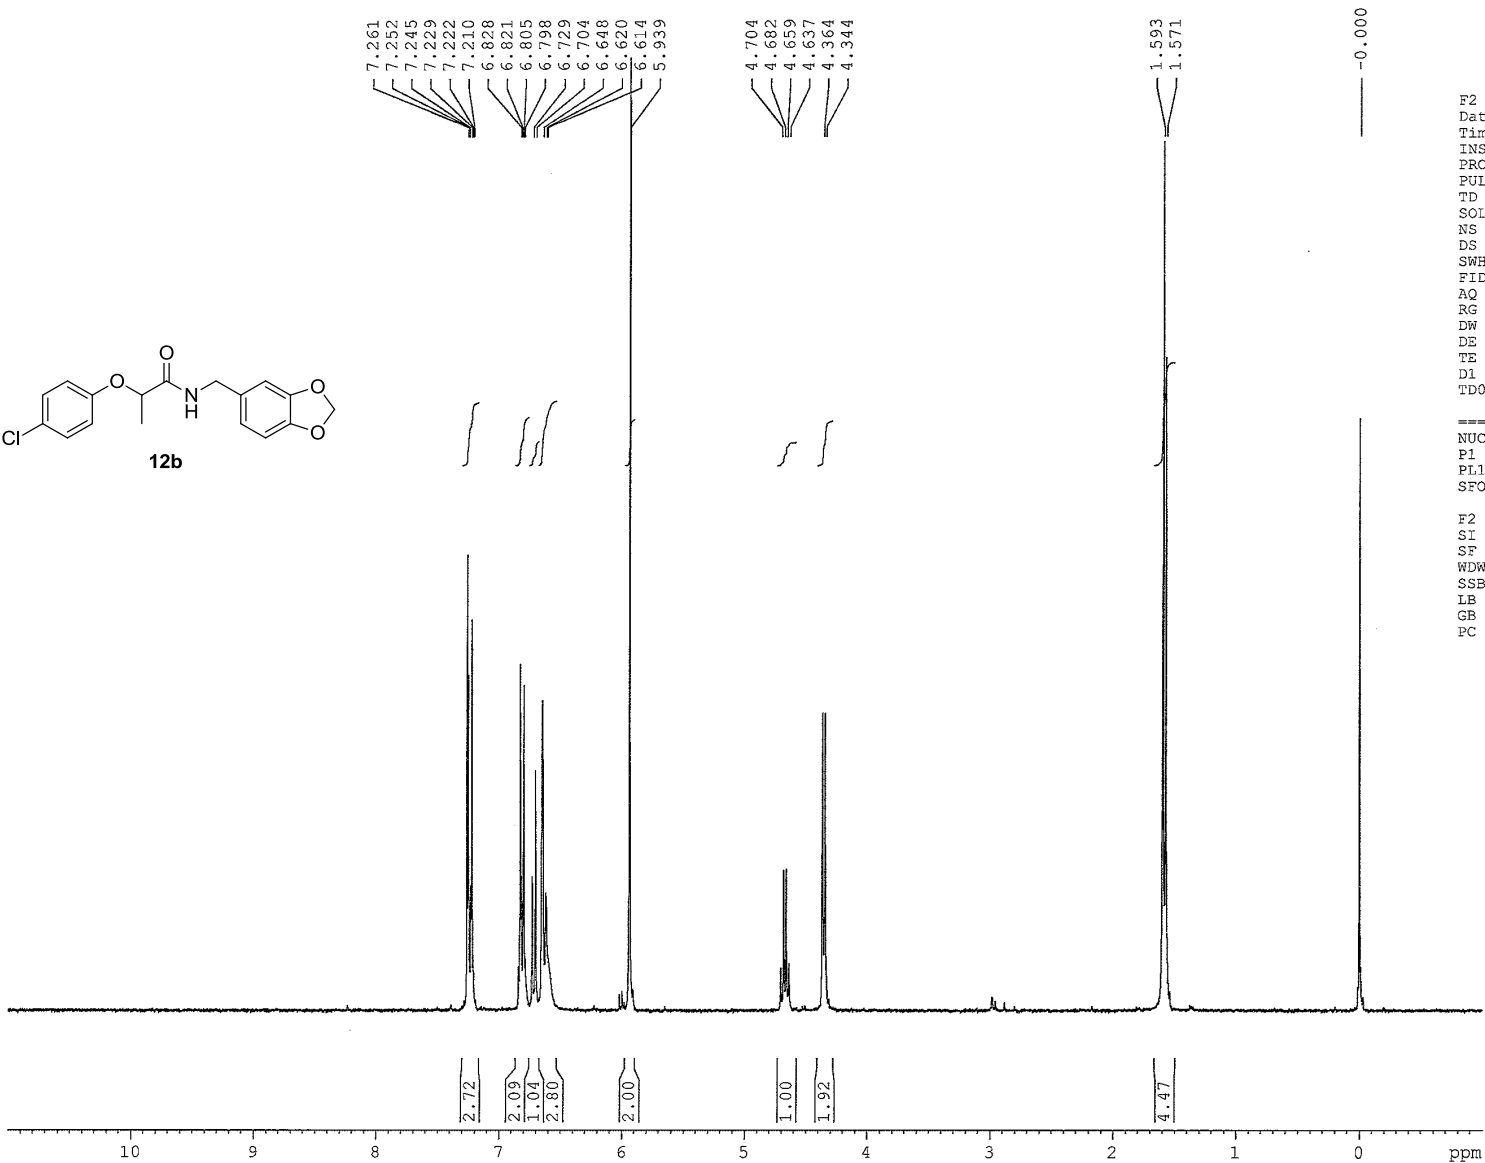

F2 - Acquisition Parameters  
 Date\_ 20131004  
 Time 17.26  
 INSTRUM spect  
 PROBHD 5 mm BBO BB-1H  
 PULPROG zg30  
 TD 65536  
 SOLVENT CDCl3  
 NS 16  
 DS 2  
 SWH 6172.839 Hz  
 FIDRES 0.094190 Hz  
 AQ 5.3084660 sec  
 RG 2580.3  
 DW 81.000 usec  
 DE 6.50 usec  
 TE 298.2 K  
 D1 1.00000000 sec  
 TDO 1

===== CHANNEL f1 =====  
 NUC1 1H  
 P1 10.00 usec  
 PL1 3.00 dB  
 SFO1 299.4518492 MHz

F2 - Processing parameters  
 SI 32768  
 SF 299.4500083 MHz  
 WDW EM  
 SSB 0  
 LB 0.30 Hz  
 GB 0  
 PC 1.00

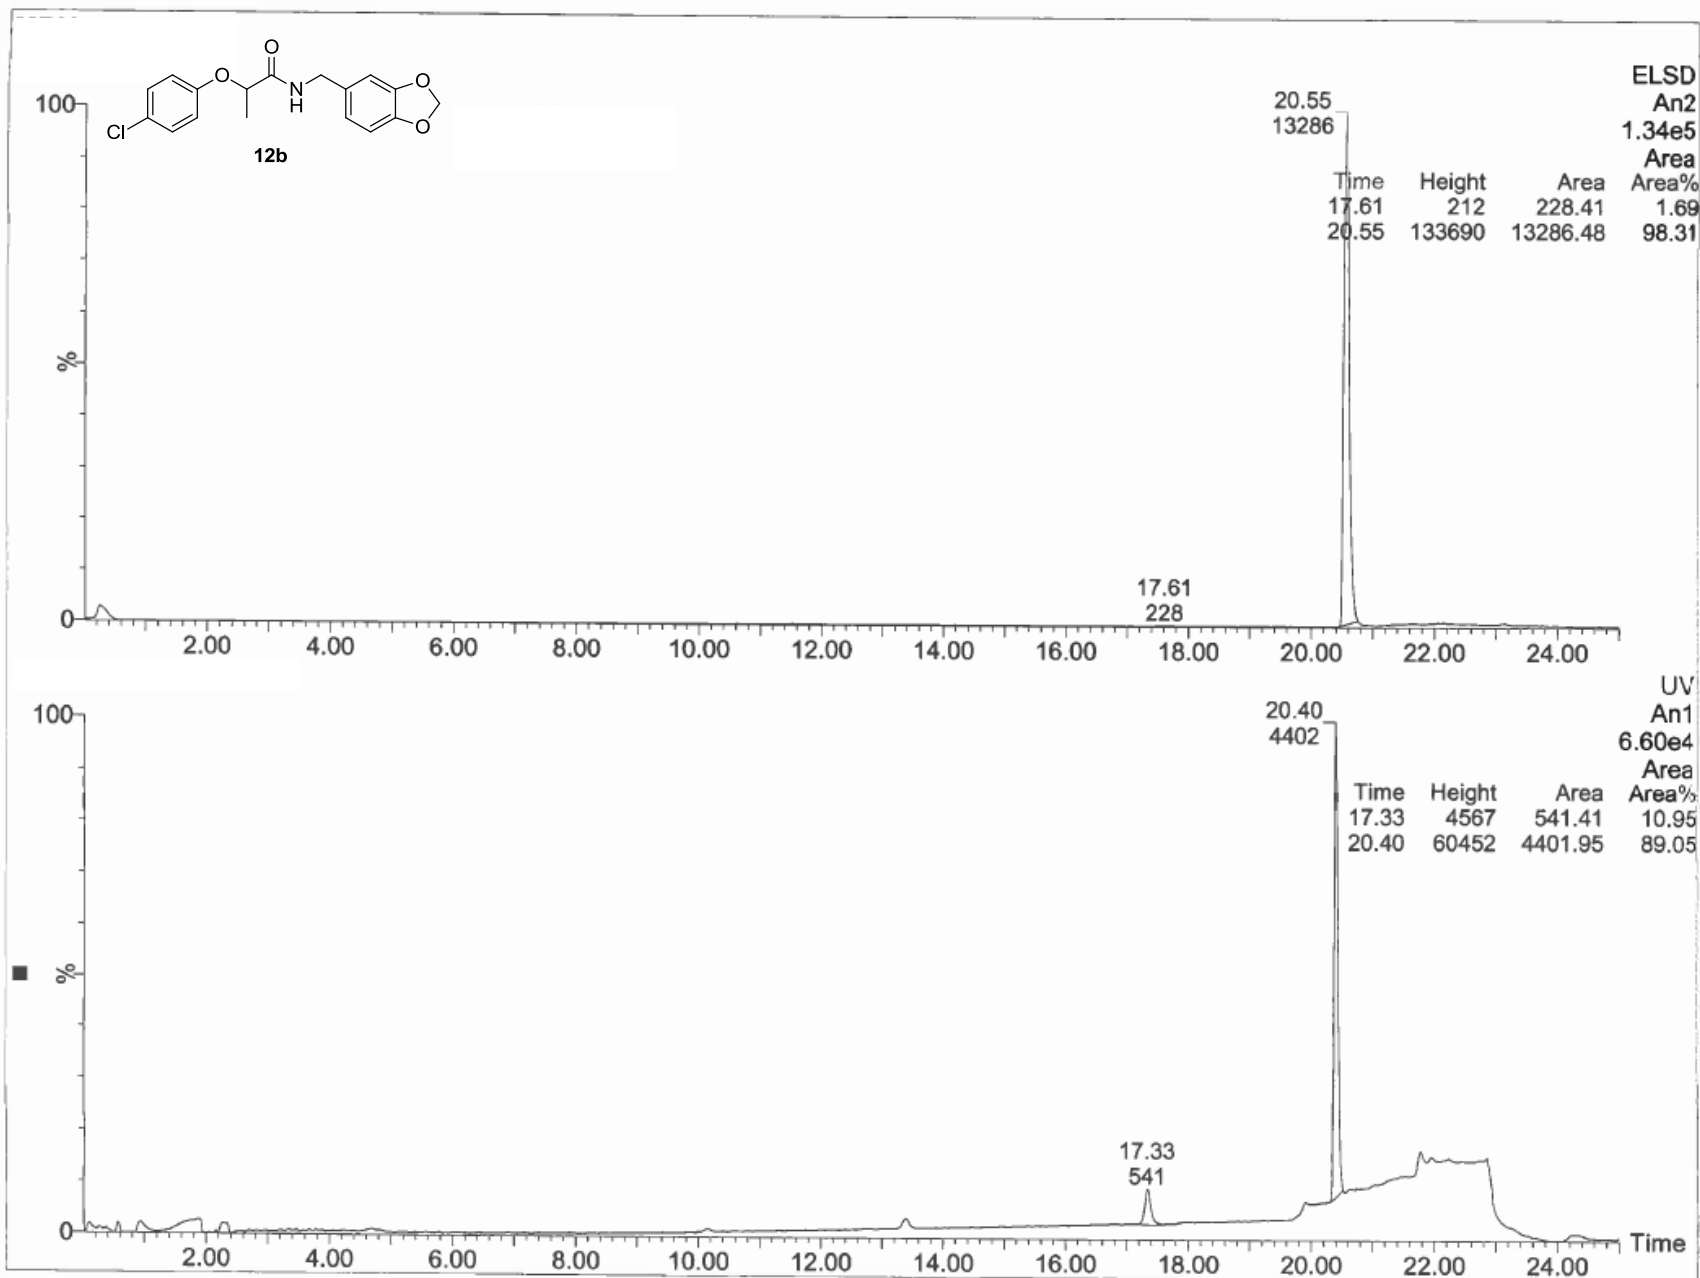

1: Scan ES+  
1.26e8

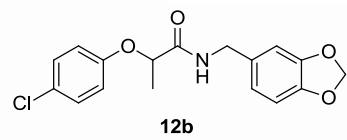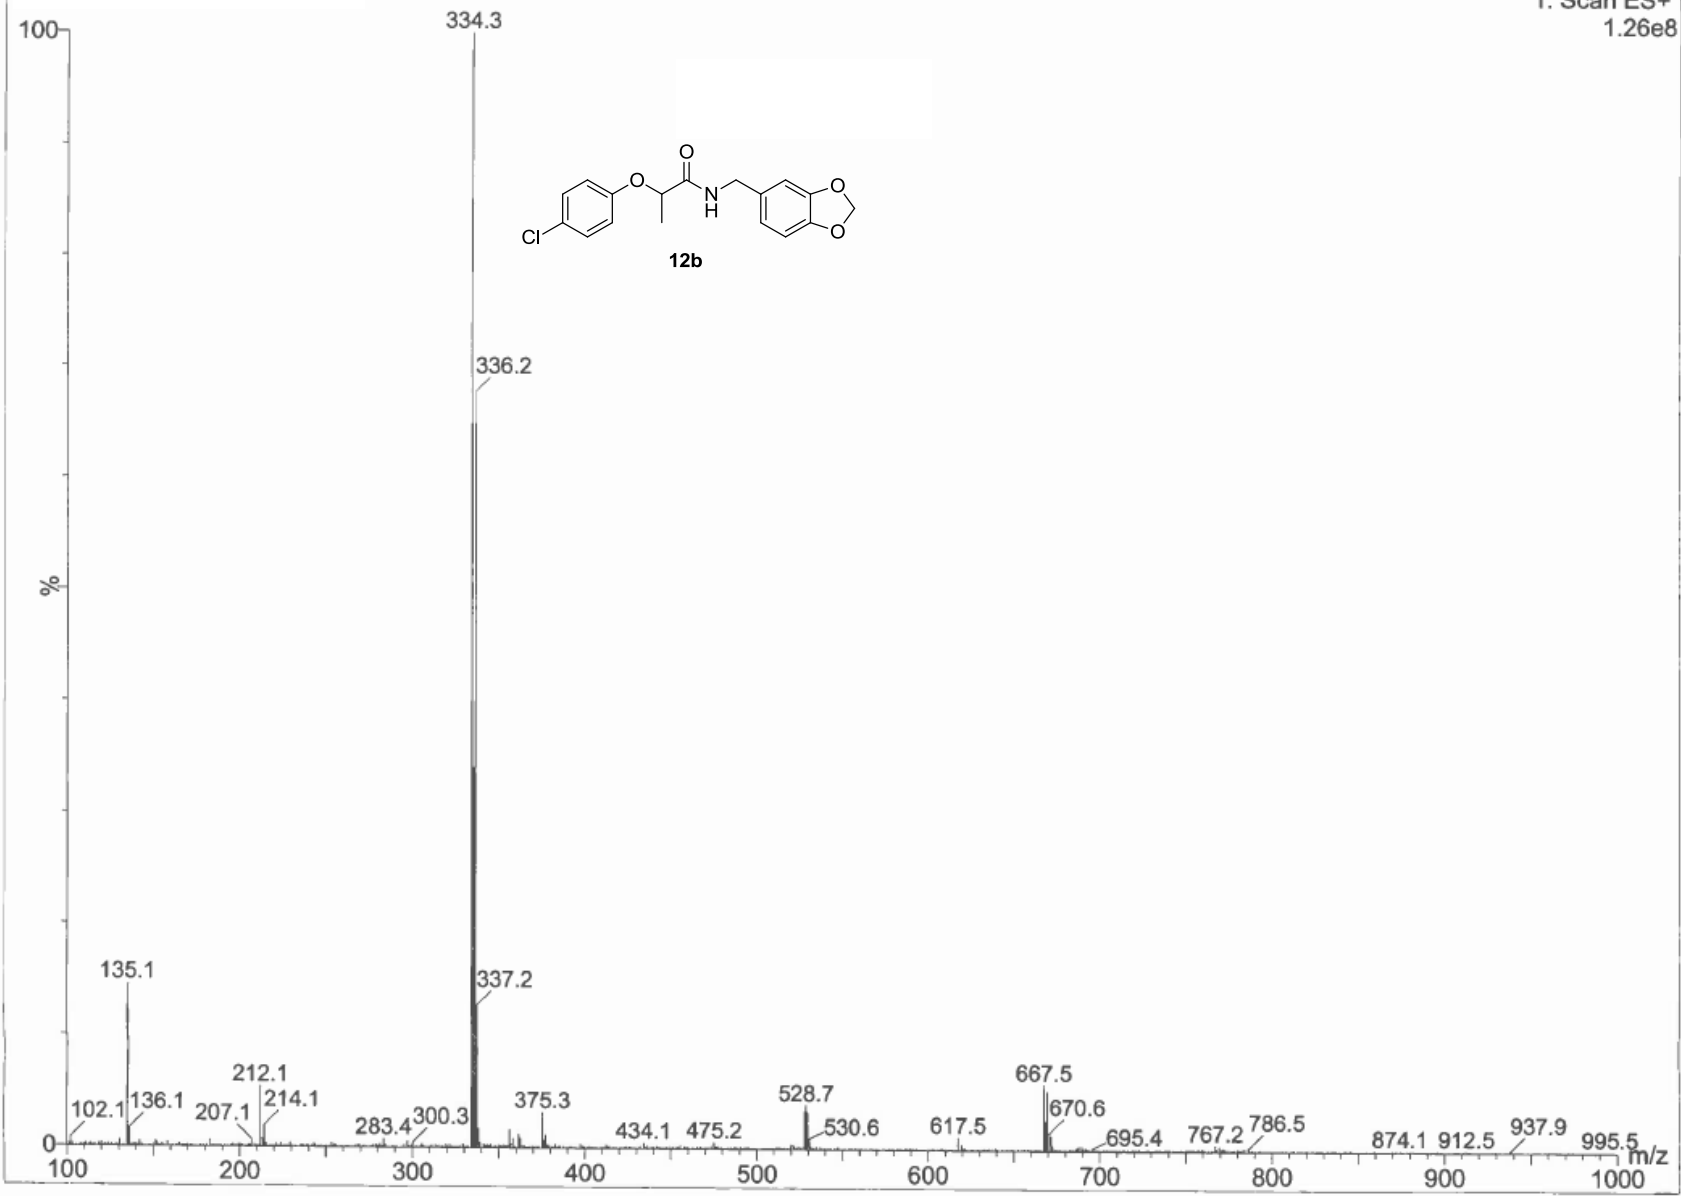

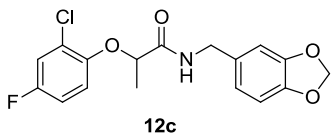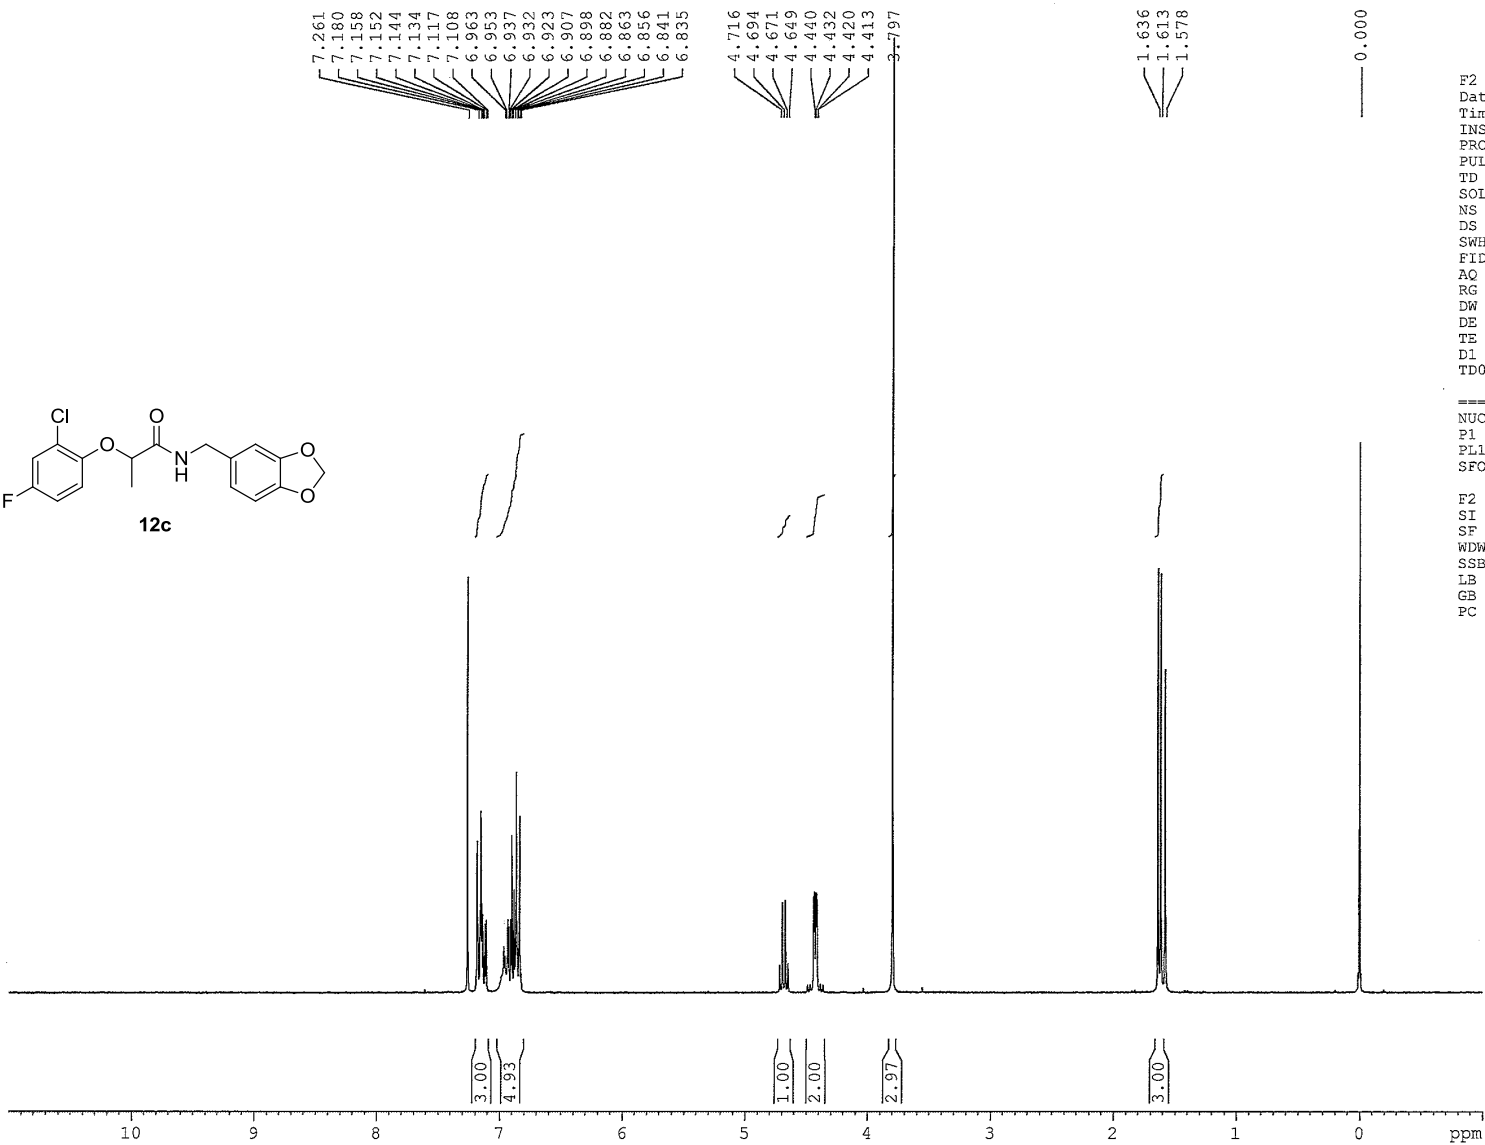

F2 - Acquisition Parameters  
 Date\_ 20100608  
 Time\_ 15.06  
 INSTRUM spect  
 PROBHD 5 mm BBO BB-1H  
 PULPROG zg30  
 TD 65536  
 SOLVENT CDCl3  
 NS 16  
 DS 2  
 SWH 6172.839 Hz  
 FIDRES 0.094190 Hz  
 AQ 5.3084660 sec  
 RG 2048  
 DW 81.000 usec  
 DE 6.50 usec  
 TE 298.2 K  
 D1 1.00000000 sec  
 TD0 1

===== CHANNEL f1 =====  
 NUC1 1H  
 P1 10.00 usec  
 PL1 9.20 dB  
 SFO1 299.5718500 MHz

F2 - Processing parameters  
 SI 32768  
 SF 299.5700032 MHz  
 WDW EM  
 SSB 0  
 LB 0.30 Hz  
 GB 0  
 PC 1.00

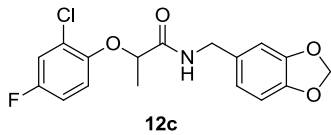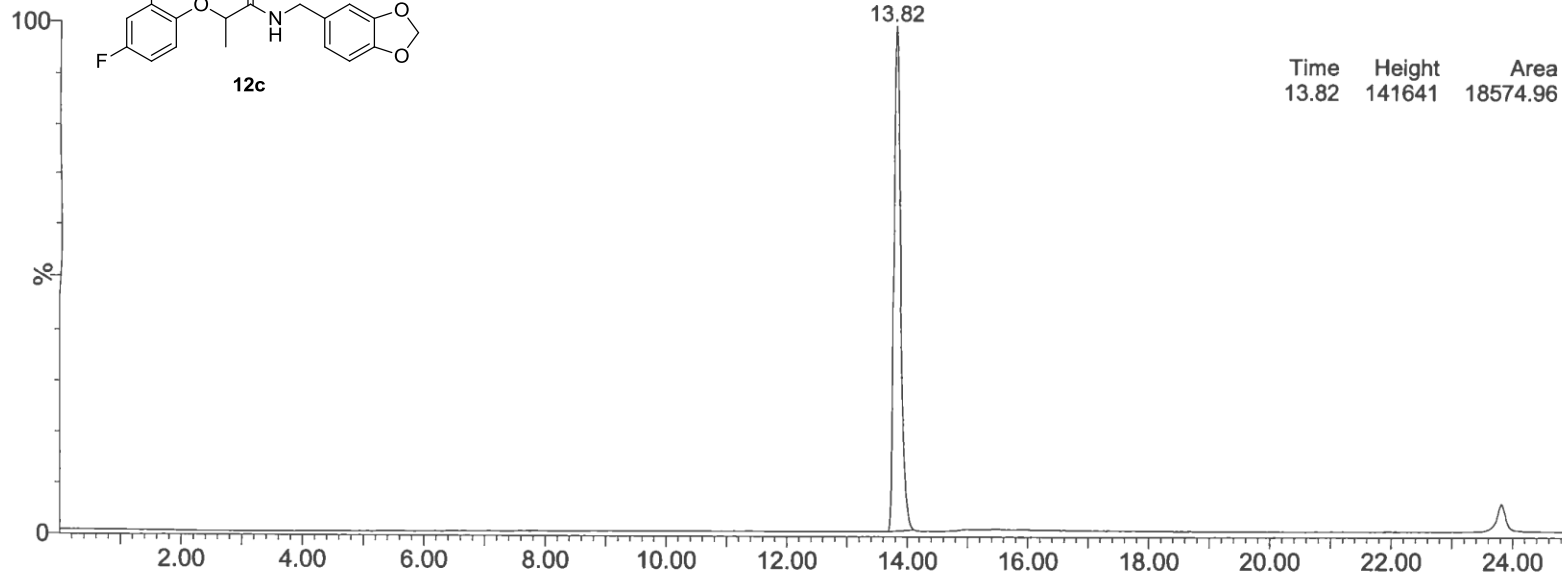

ELSD  
An2  
1.43e5  
Area%

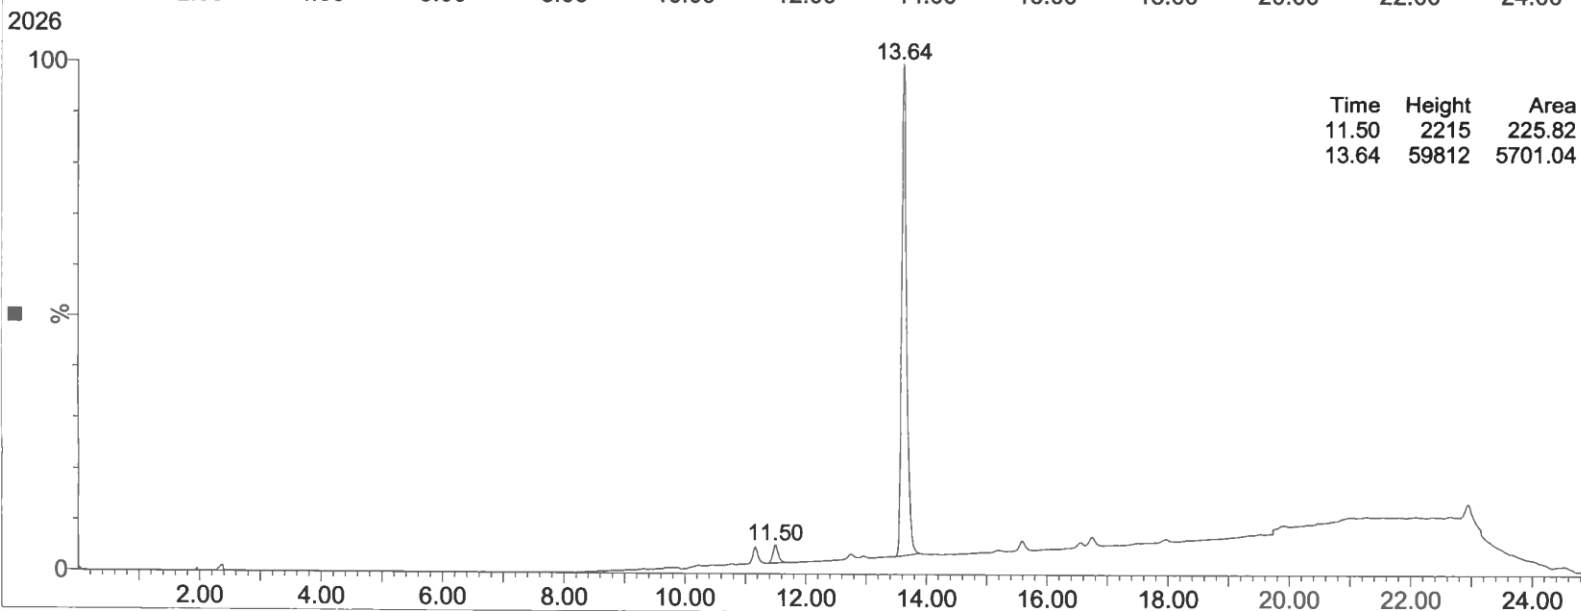

UV  
An1  
6.20e4  
Area%

1: Scan ES+  
8.86e7

100  
134.9

%

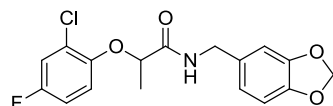

12c

352.1

374.0 415.1

703.3

117.9 136.1

351.5

376.1 417.0

725.2

173.0 202.1 229.0

343.2

393.0 418.3

727.2

477.1 493.2 547.9 587.2 653.1 669.0

728.4

787.5 803.7 838.3 907.3

m/z



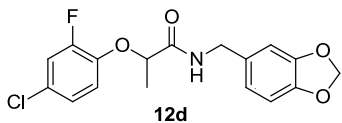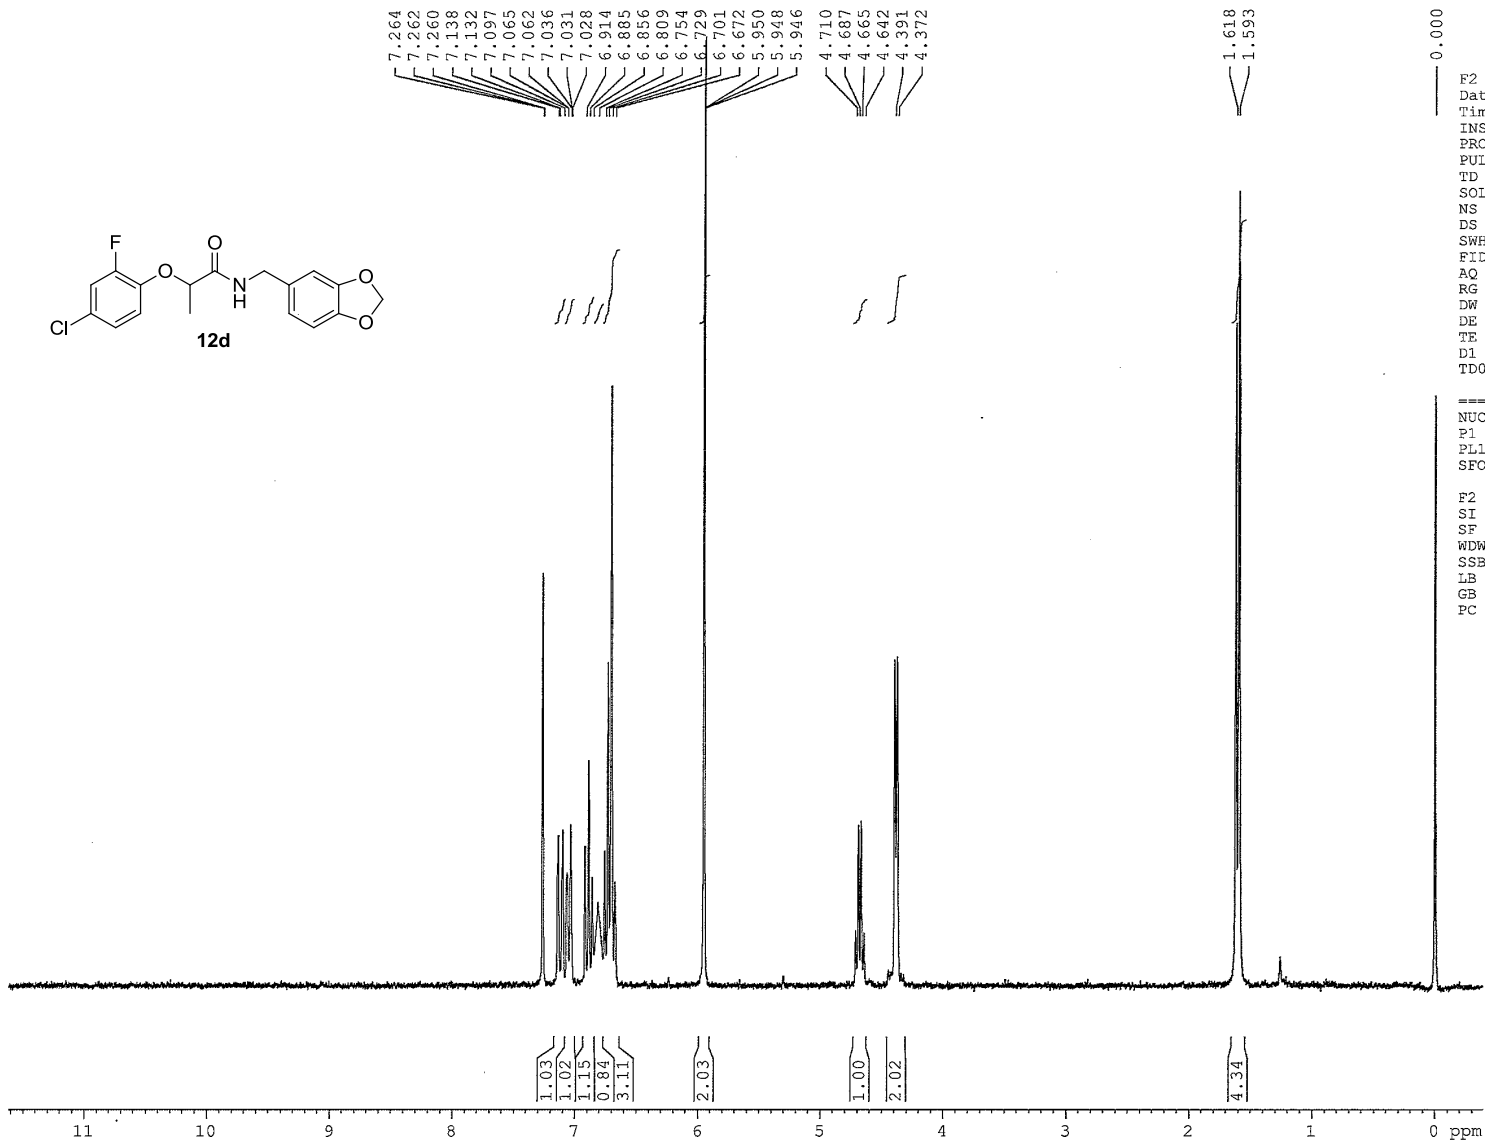

F2 - Acquisition Parameters  
 Date\_ 20130816  
 Time\_ 15.55  
 INSTRUM spect  
 PROBHD 5 mm BBO BB-1H  
 PULPROG zg30  
 TD 65536  
 SOLVENT CDCl3  
 NS 16  
 DS 2  
 SWH 6172.839 Hz  
 FIDRES 0.094190 Hz  
 AQ 5.3084660 sec  
 RG 2580.3  
 DW 81.000 usec  
 DE 6.50 usec  
 TE 298.2 K  
 D1 1.00000000 sec  
 TD0 1

===== CHANNEL f1 =====  
 NUC1 1H  
 P1 10.00 usec  
 PL1 3.00 dB  
 SFO1 299.4518492 MHz

F2 - Processing parameters  
 SI 32768  
 SF 299.4488791 MHz  
 WDW EM  
 SSB 0  
 LB 0.30 Hz  
 GB 0  
 PC 1.00

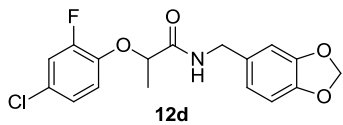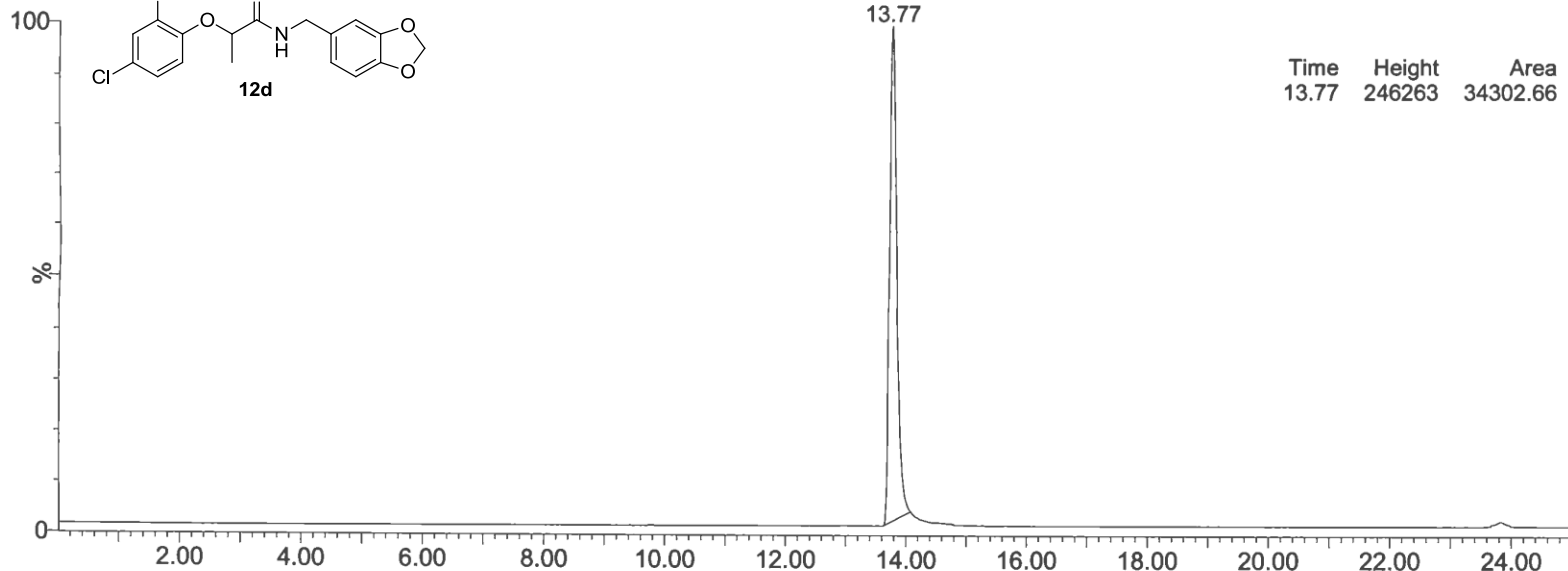

ELSD  
An2  
2.53e5

| Time  | Height | Area     | Area%  |
|-------|--------|----------|--------|
| 13.77 | 246263 | 34302.66 | 100.00 |

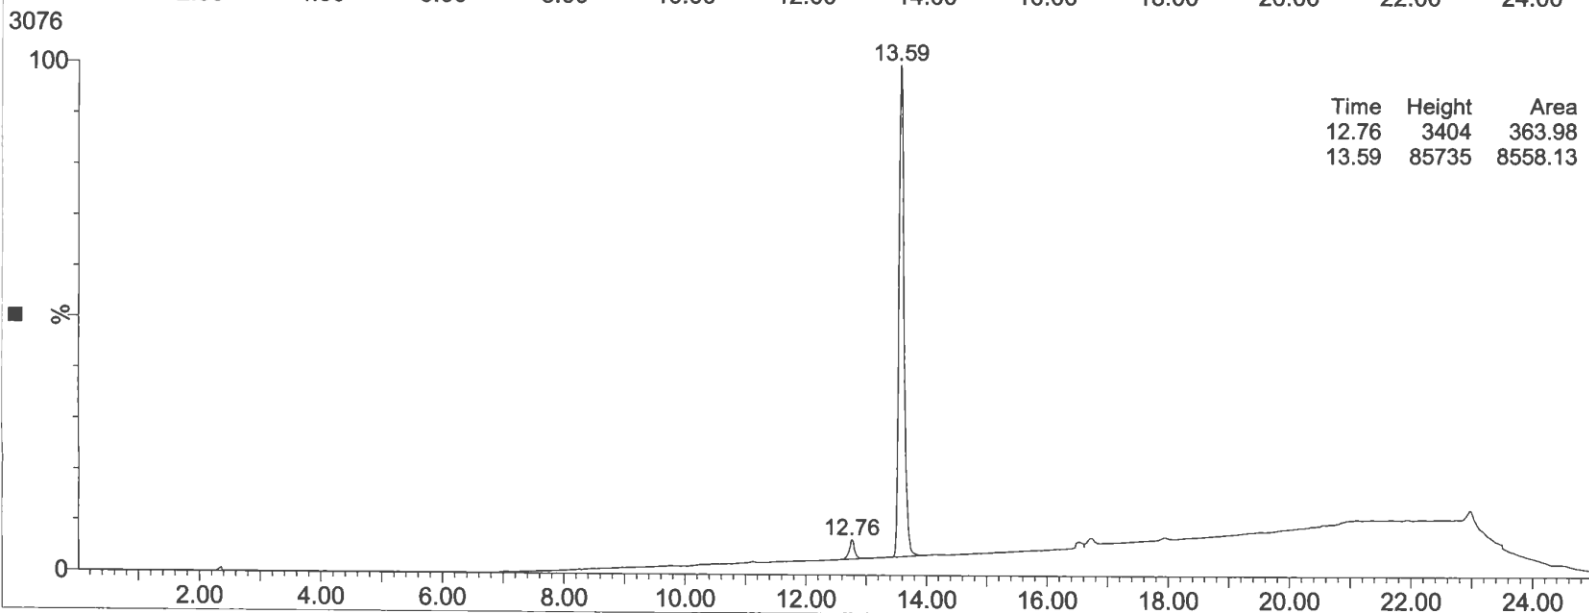

UV  
An1  
8.89e4

| Time  | Height | Area    | Area% |
|-------|--------|---------|-------|
| 12.76 | 3404   | 363.98  | 4.08  |
| 13.59 | 85735  | 8558.13 | 95.92 |

1: Scan ES+  
1.29e8

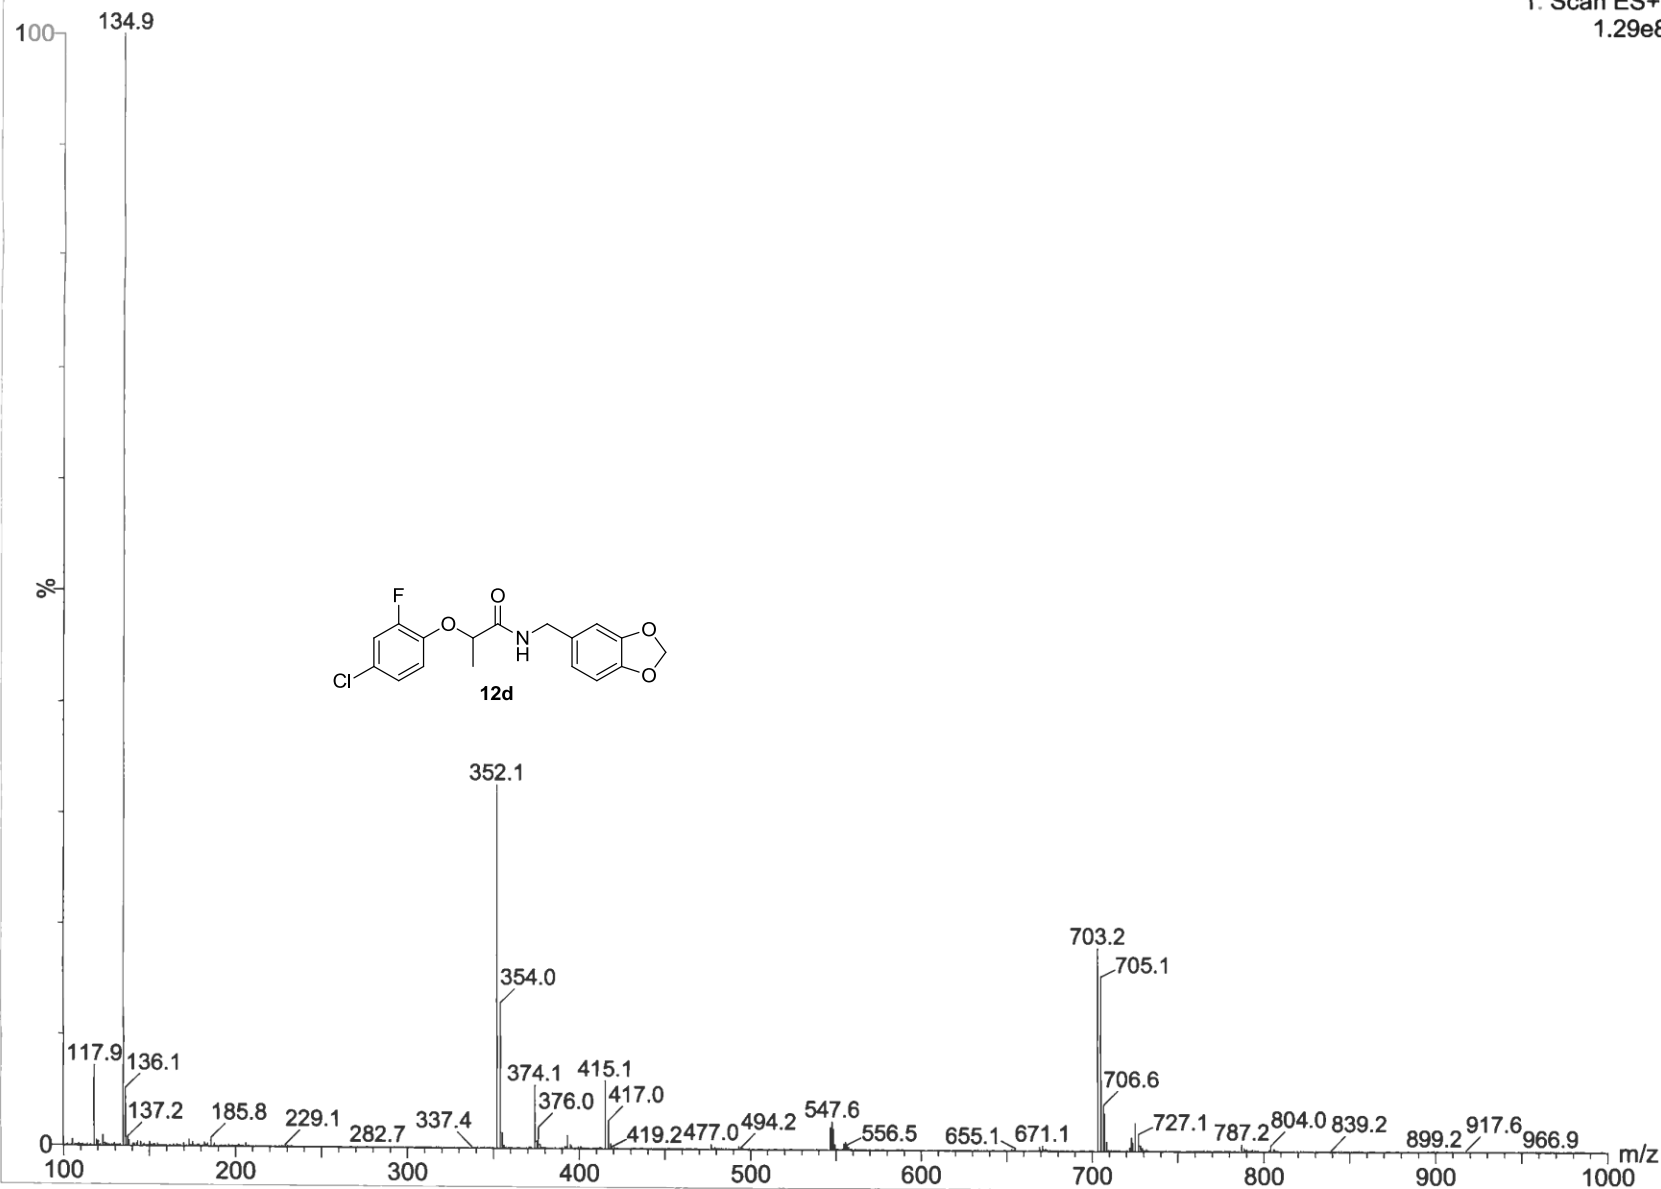

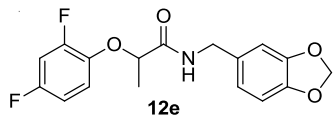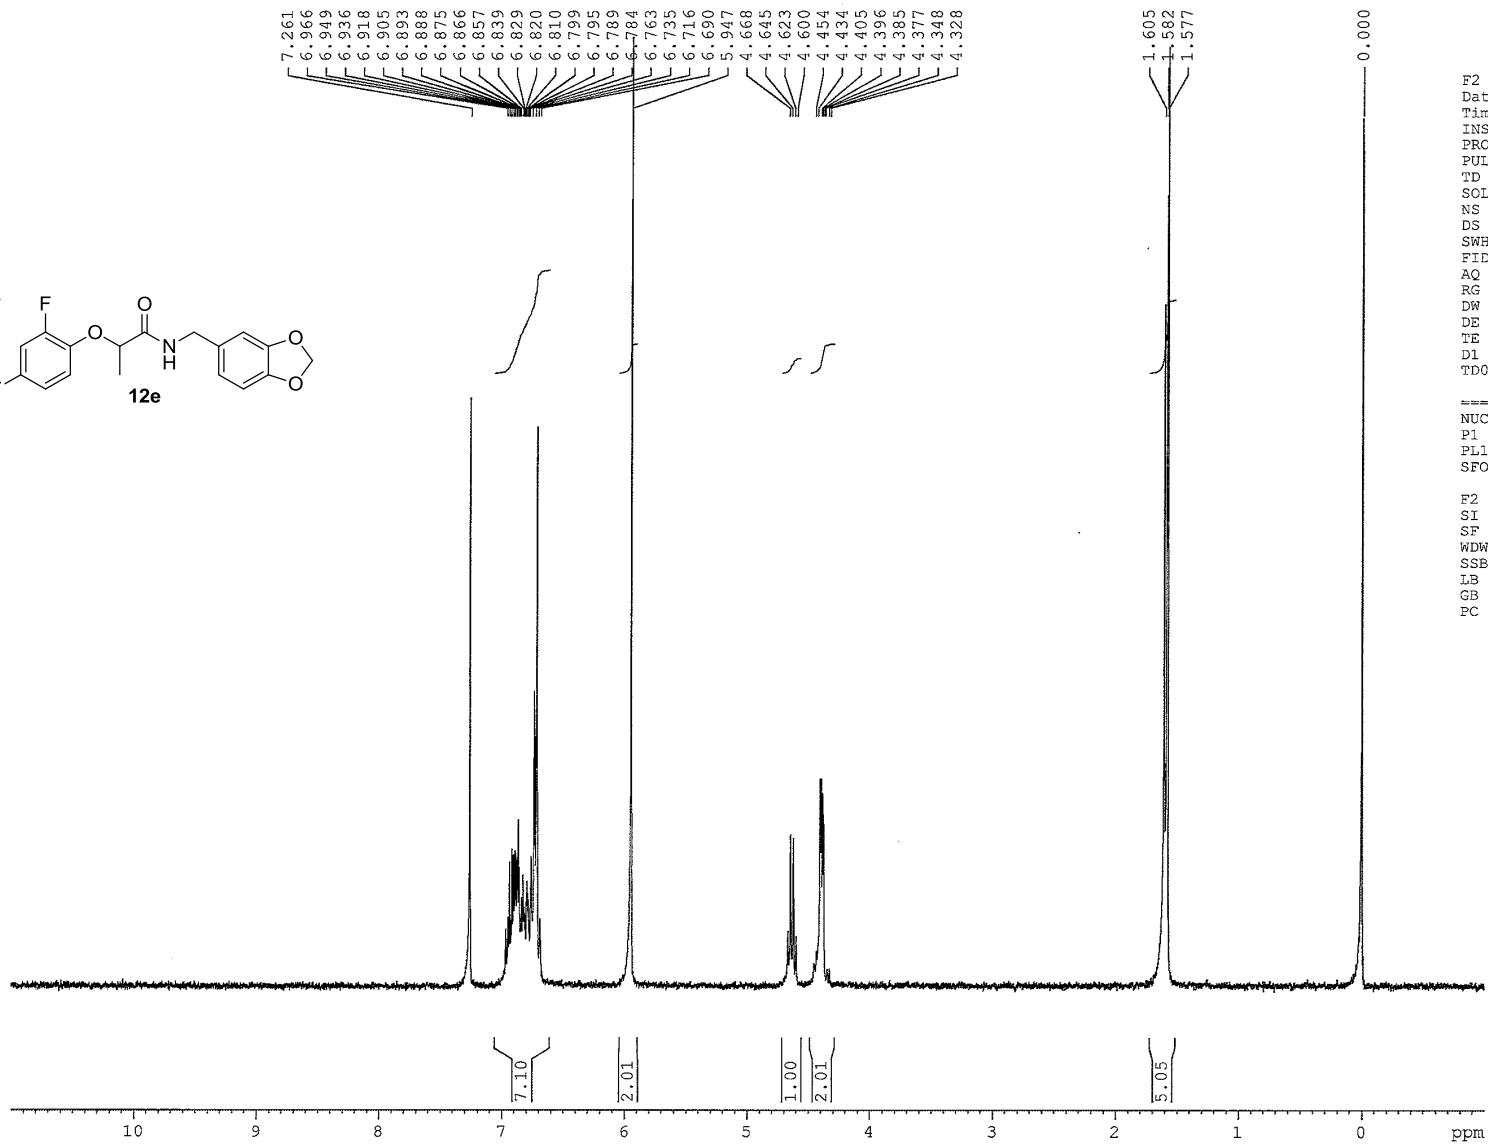

F2 - Acquisition Parameters  
 Date\_ 20130816  
 Time\_ 13.44  
 INSTRUM spect  
 PROBHD 5 mm BBO BB-1H  
 PULPROG zg30  
 TD 65536  
 SOLVENT CDC13  
 NS 16  
 DS 2  
 SWH 6172.839 Hz  
 FIDRES 0.094190 Hz  
 AQ 5.3084660 sec  
 RG 3251  
 DW 81.000 usec  
 DE 6.50 usec  
 TE 298.2 K  
 D1 1.00000000 sec  
 TD0 1

----- CHANNEL f1 -----  
 NUC1 1H  
 P1 10.00 usec  
 PL1 3.00 dB  
 SFO1 299.4518492 MHz

F2 - Processing parameters  
 SI 32768  
 SF 299.4500071 MHz  
 WDW EM  
 SSB 0  
 LB 0.30 Hz  
 GB 0  
 PC 1.00

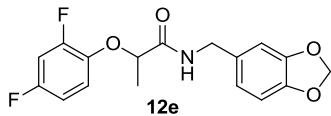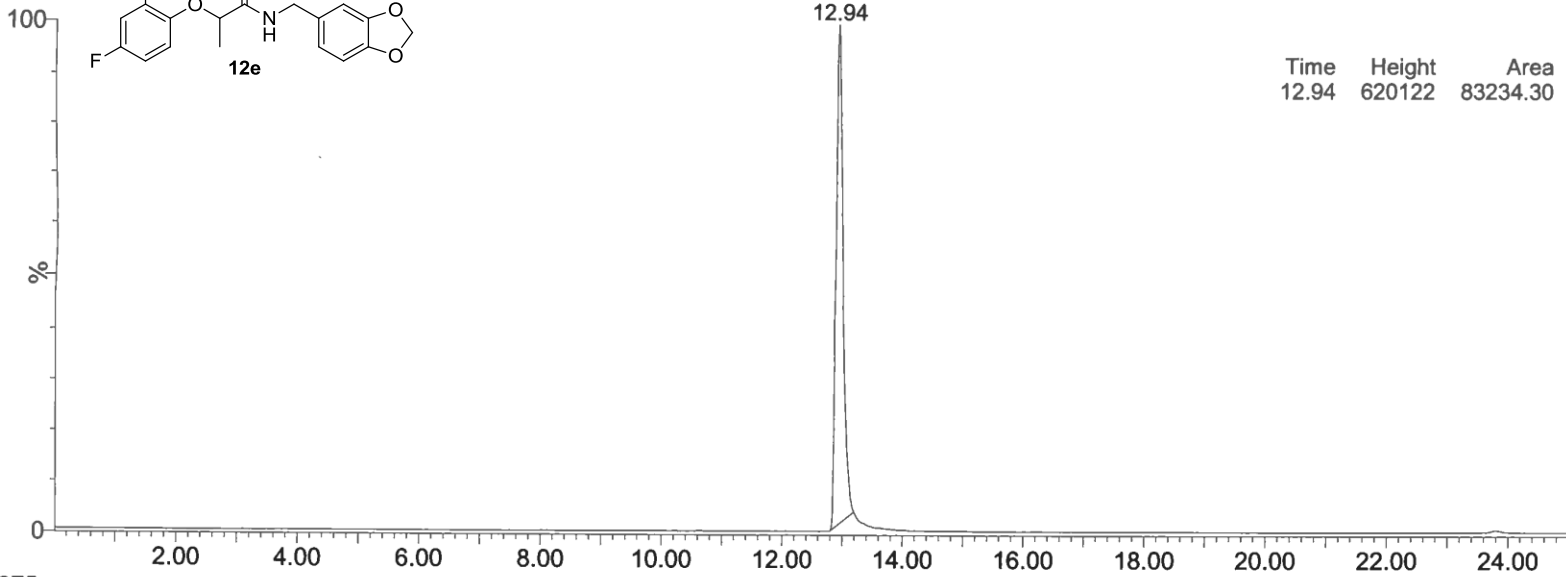

ELSD  
An2  
6.33e5

| Time  | Height | Area     | Area%  |
|-------|--------|----------|--------|
| 12.94 | 620122 | 83234.30 | 100.00 |

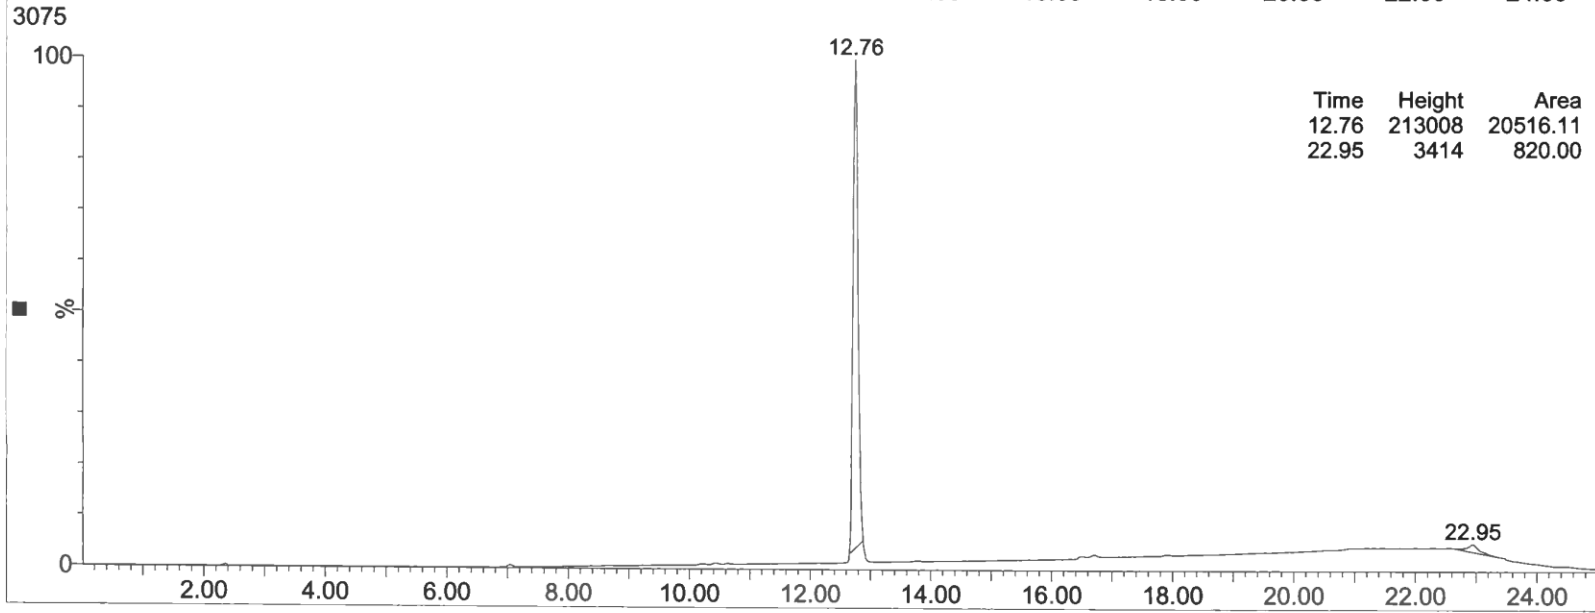

UV  
An1  
2.22e5

| Time  | Height | Area     | Area% |
|-------|--------|----------|-------|
| 12.76 | 213008 | 20516.11 | 96.16 |
| 22.95 | 3414   | 820.00   | 3.84  |

1: Scan ES+  
1.80e8

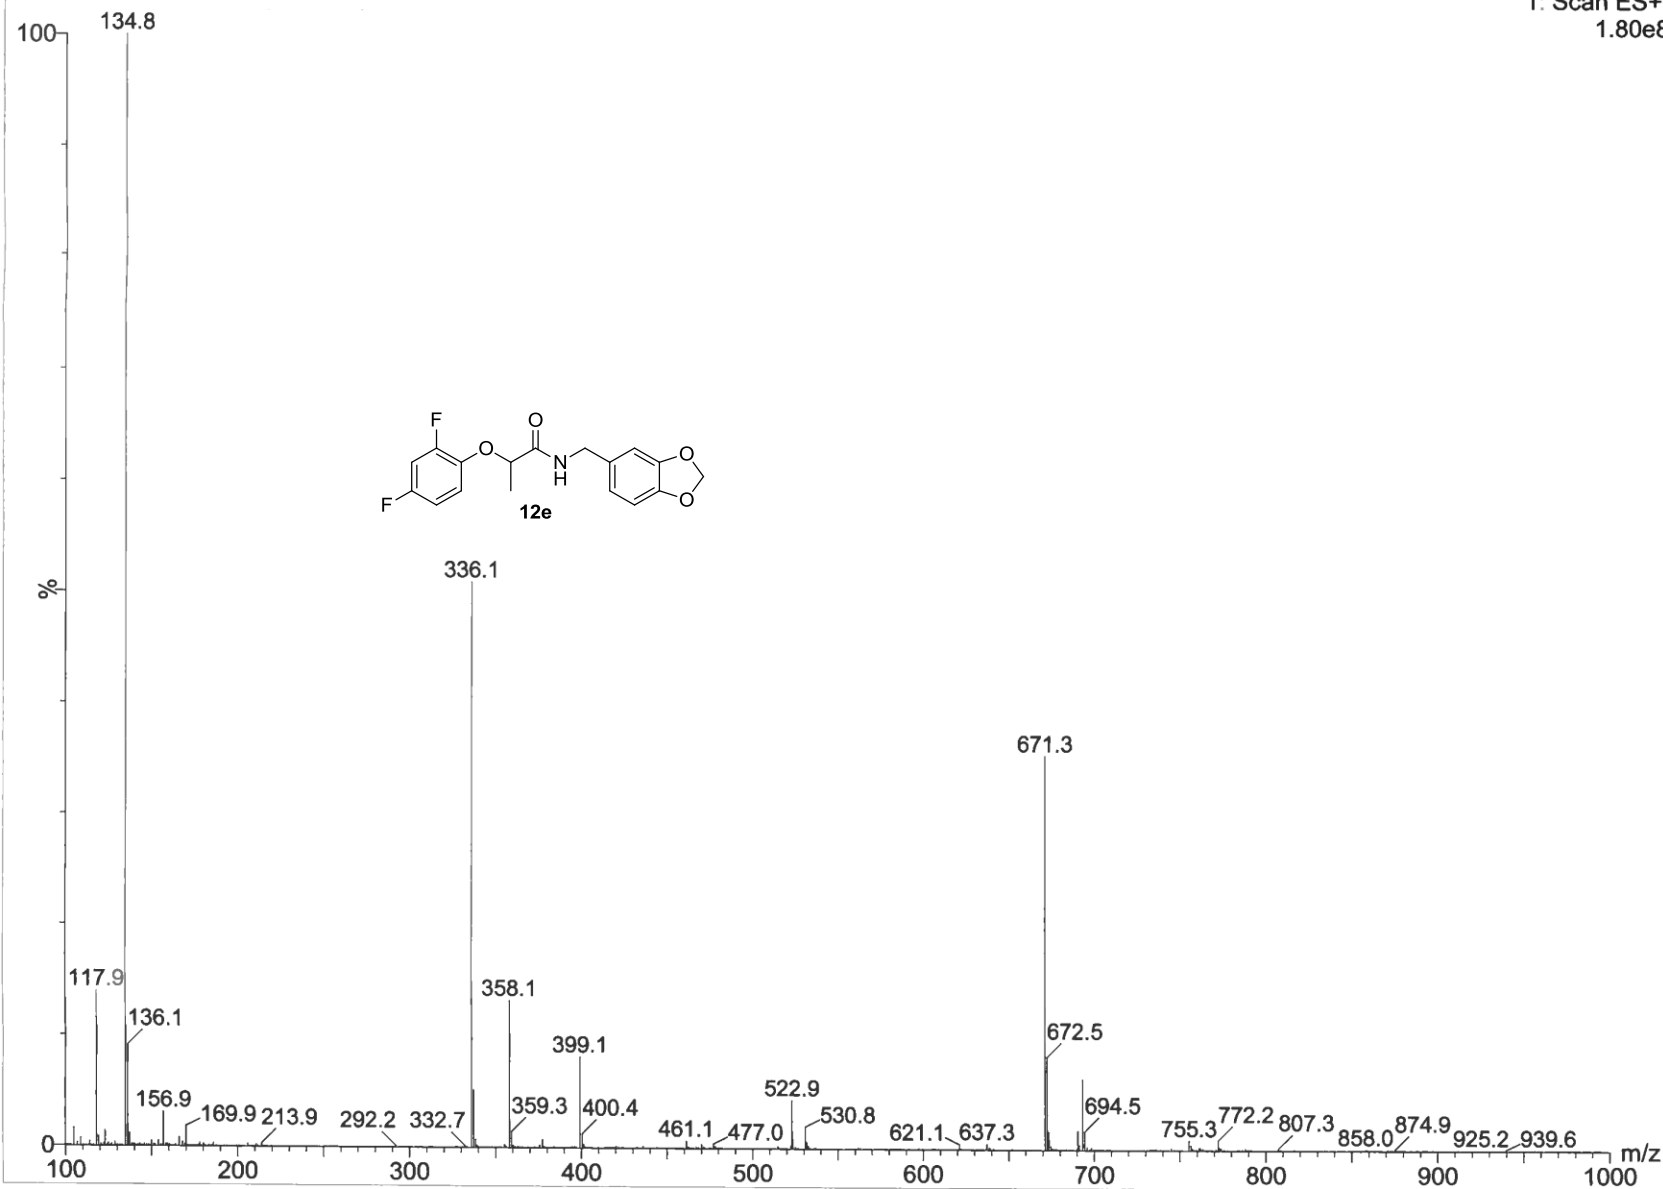

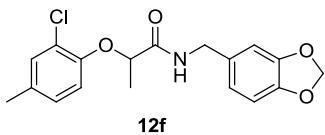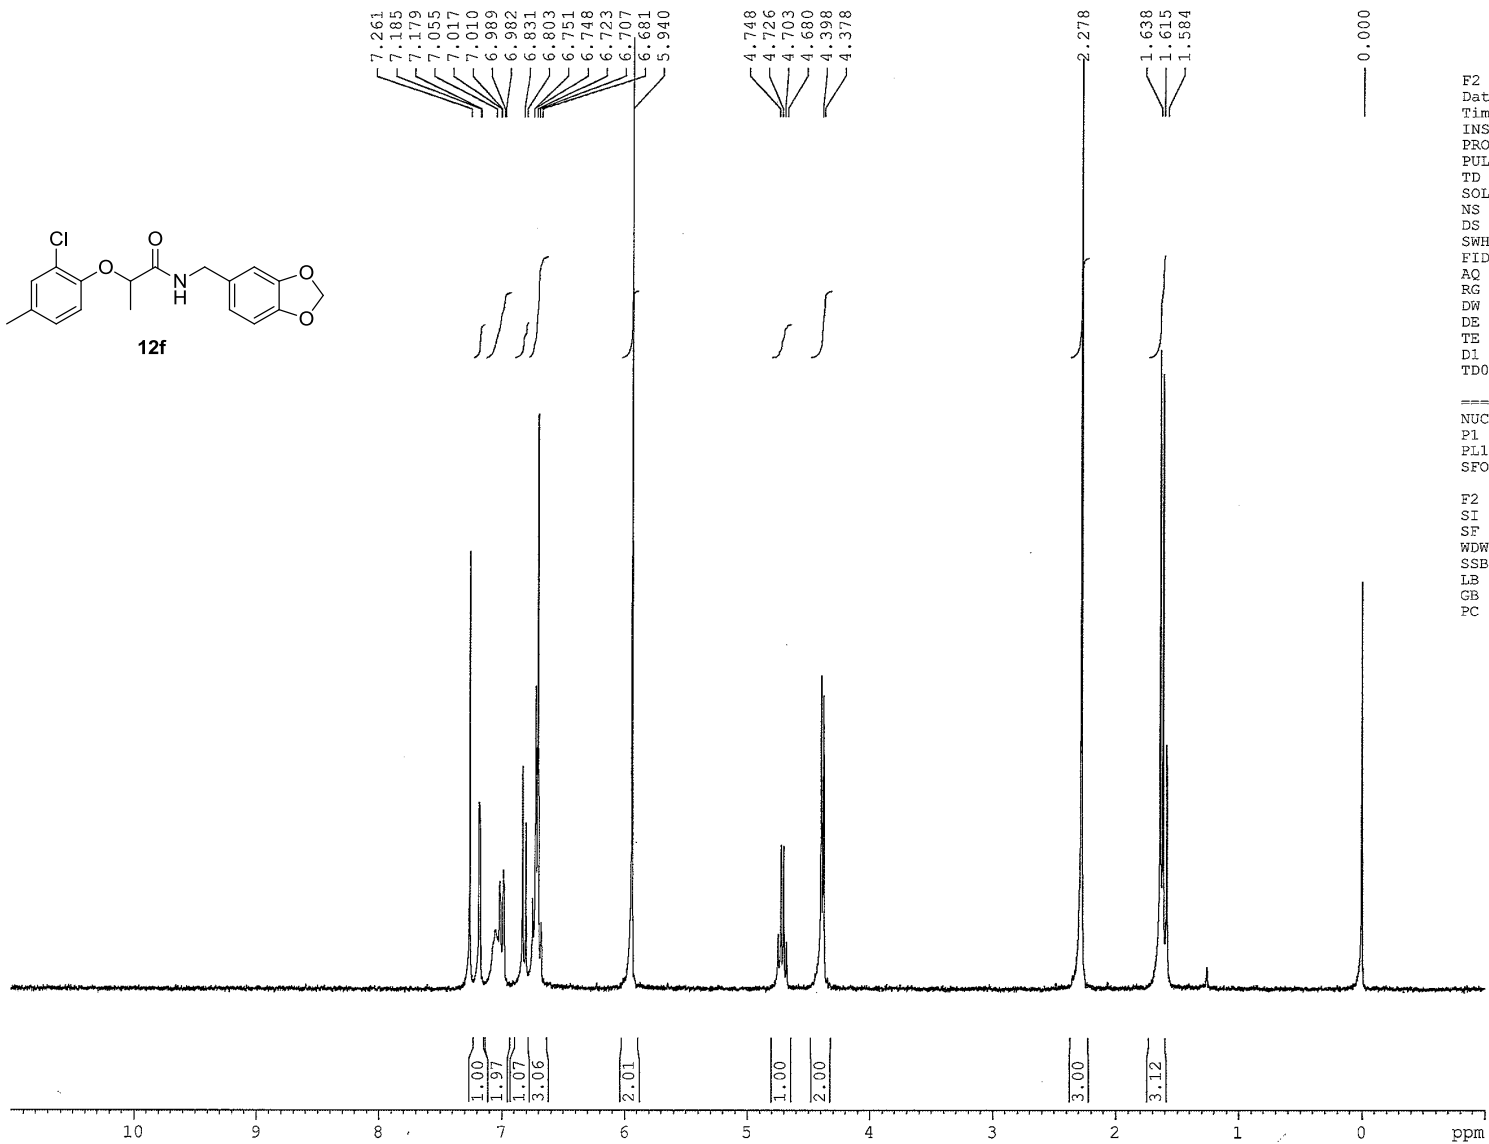

F2 - Acquisition Parameters  
 Date\_ 20131115  
 Time\_ 13.28  
 INSTRUM spect  
 PROBDH 5 mm BBO BE-1H  
 PULPROG zg30  
 TD 65536  
 SOLVENT CDCl3  
 NS 16  
 DS 2  
 SWH 6172.839 Hz  
 FIDRES 0.094190 Hz  
 AQ 5.3084660 sec  
 RG 2580.3  
 DW 81.000 usec  
 DE 6.50 usec  
 TE 298.2 K  
 D1 1.00000000 sec  
 TD0 1

===== CHANNEL f1 =====  
 NUC1 1H  
 P1 10.00 usec  
 PL1 3.00 dB  
 SFO1 299.4518492 MHz

F2 - Processing parameters  
 SI 32768  
 SF 299.4500078 MHz  
 WDW EM  
 SSB 0  
 LB 0.30 Hz  
 GB 0  
 PC 1.00

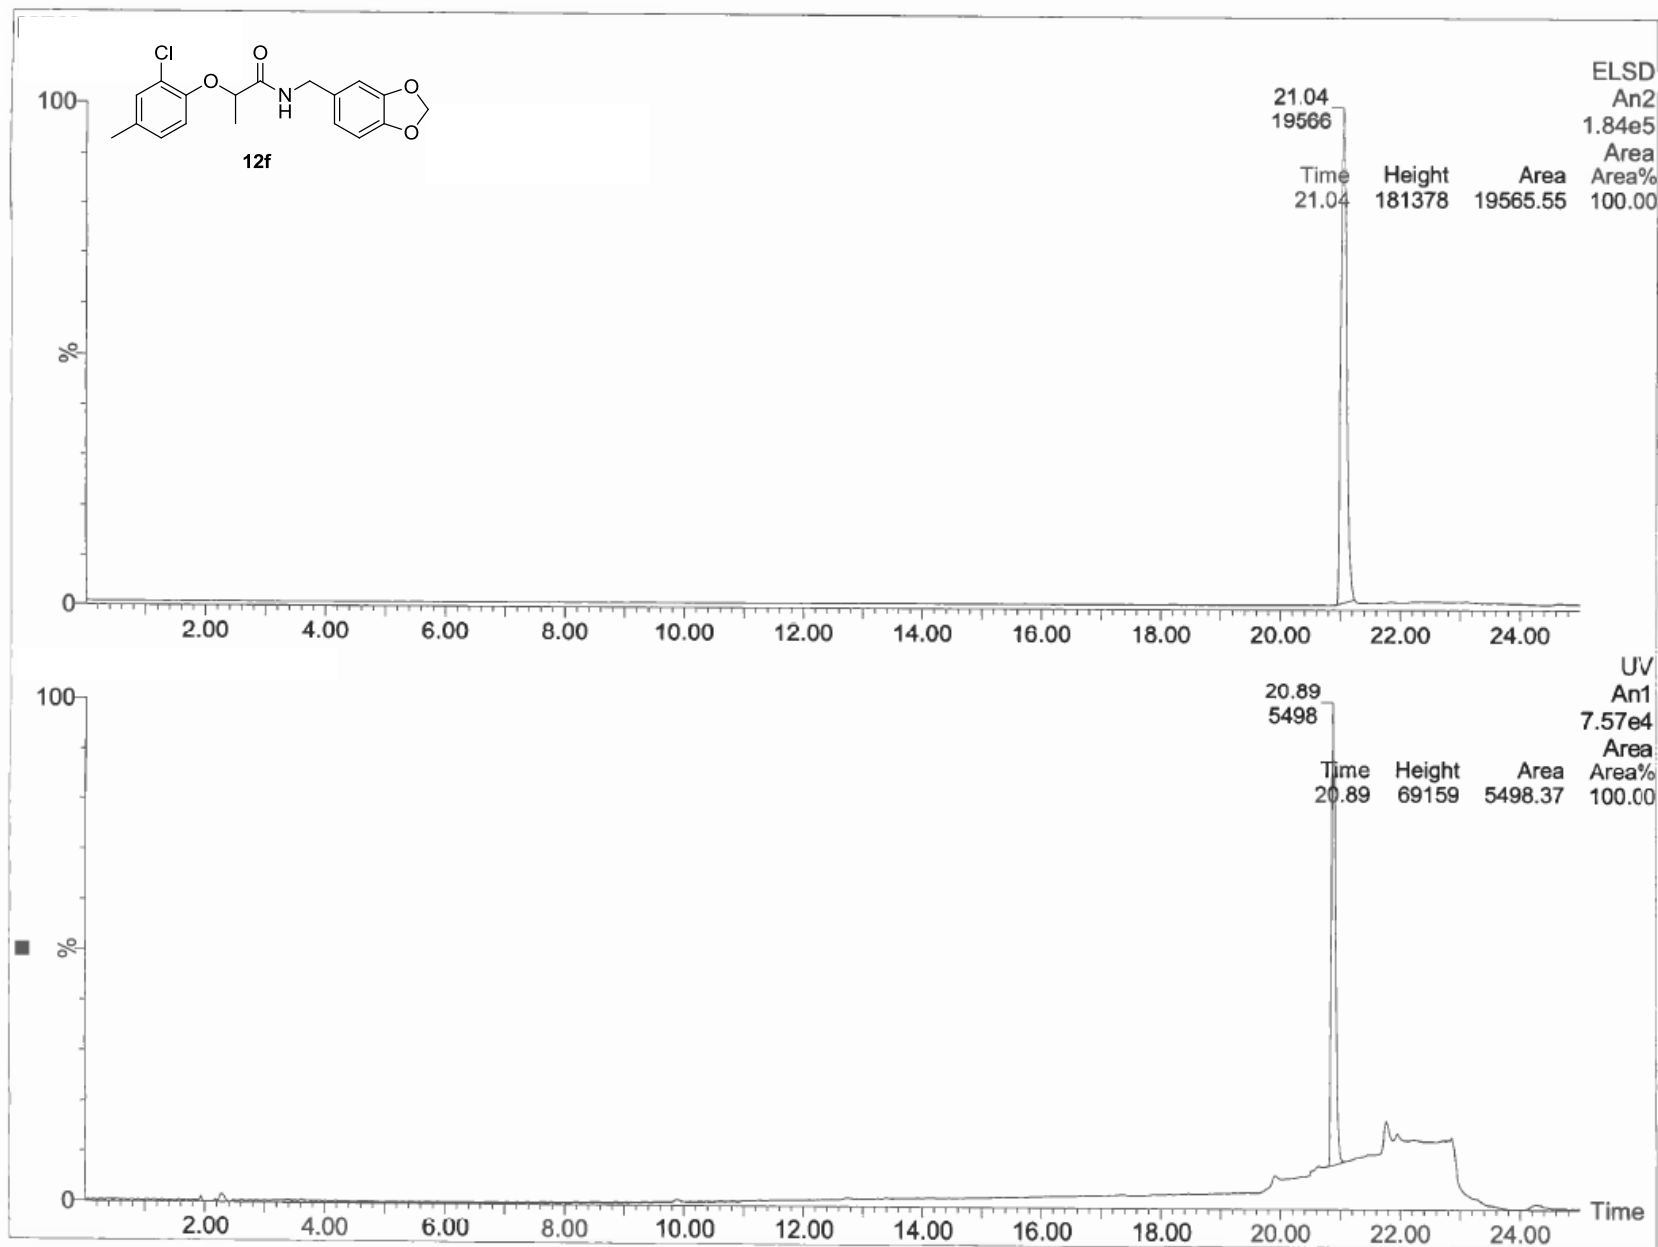



1: Scan ES+  
1.37e8

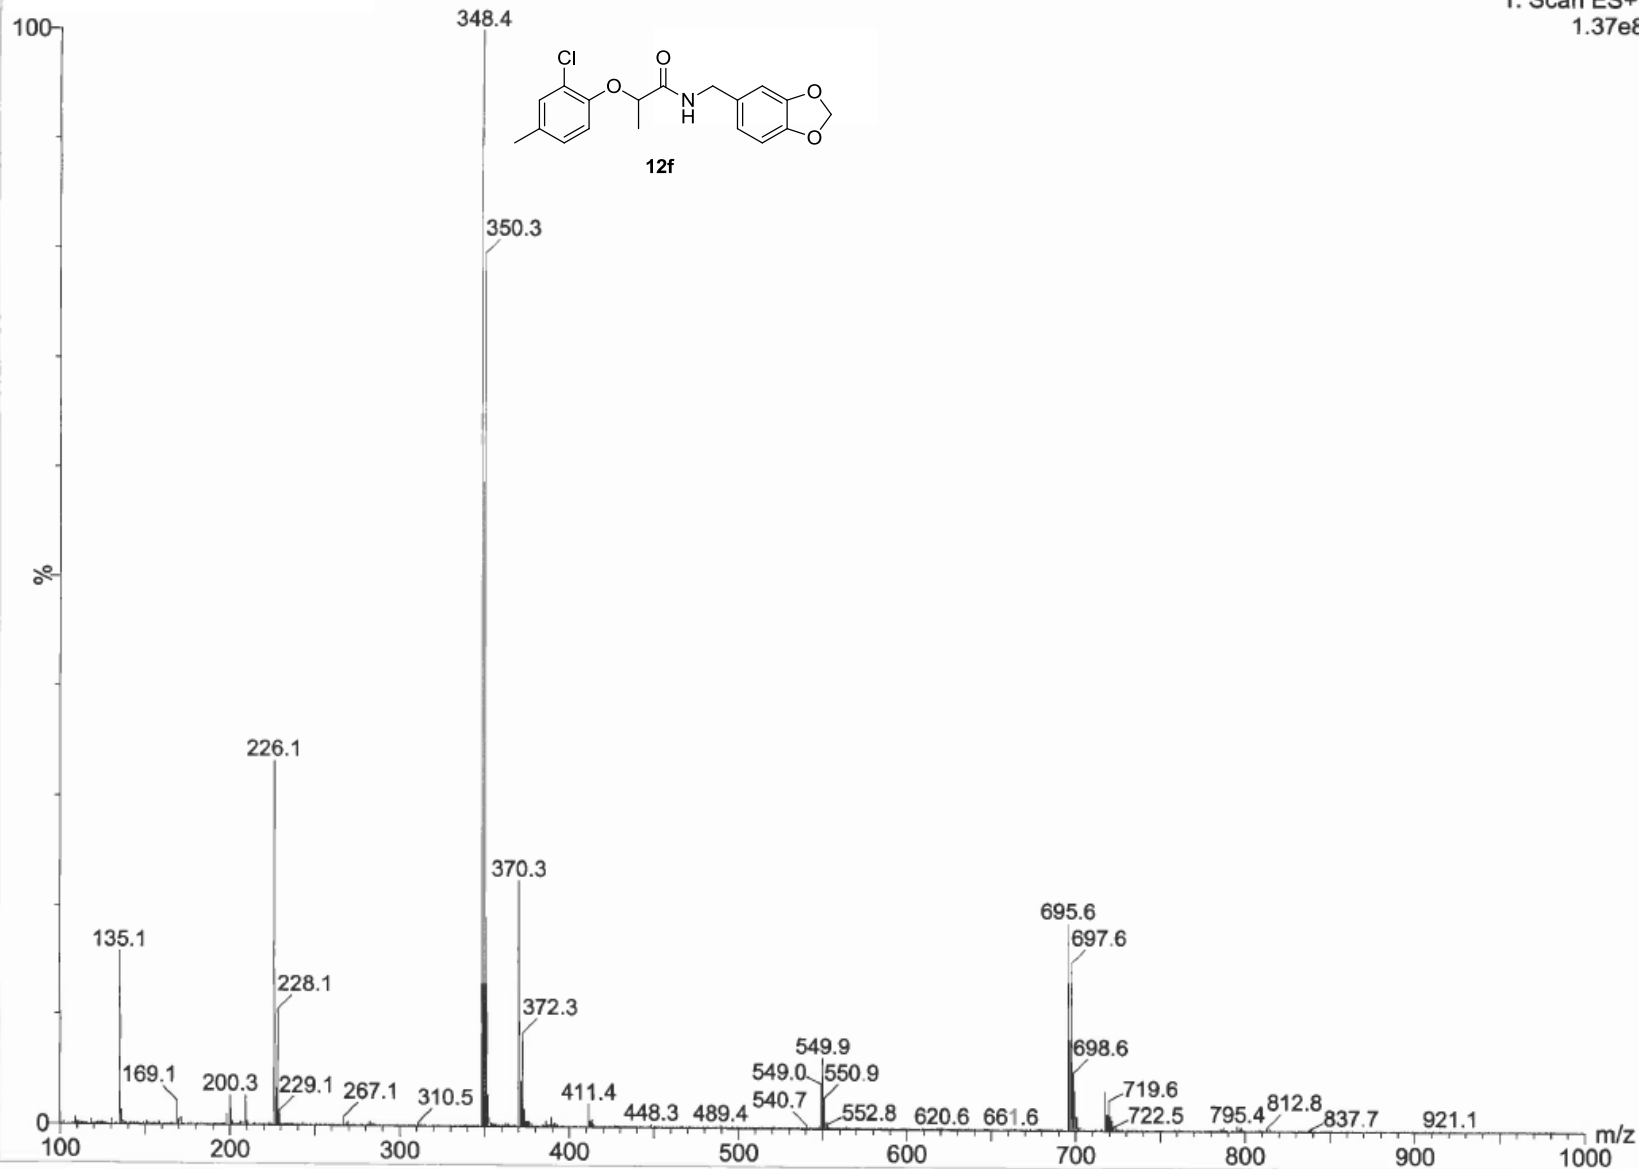

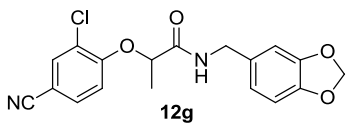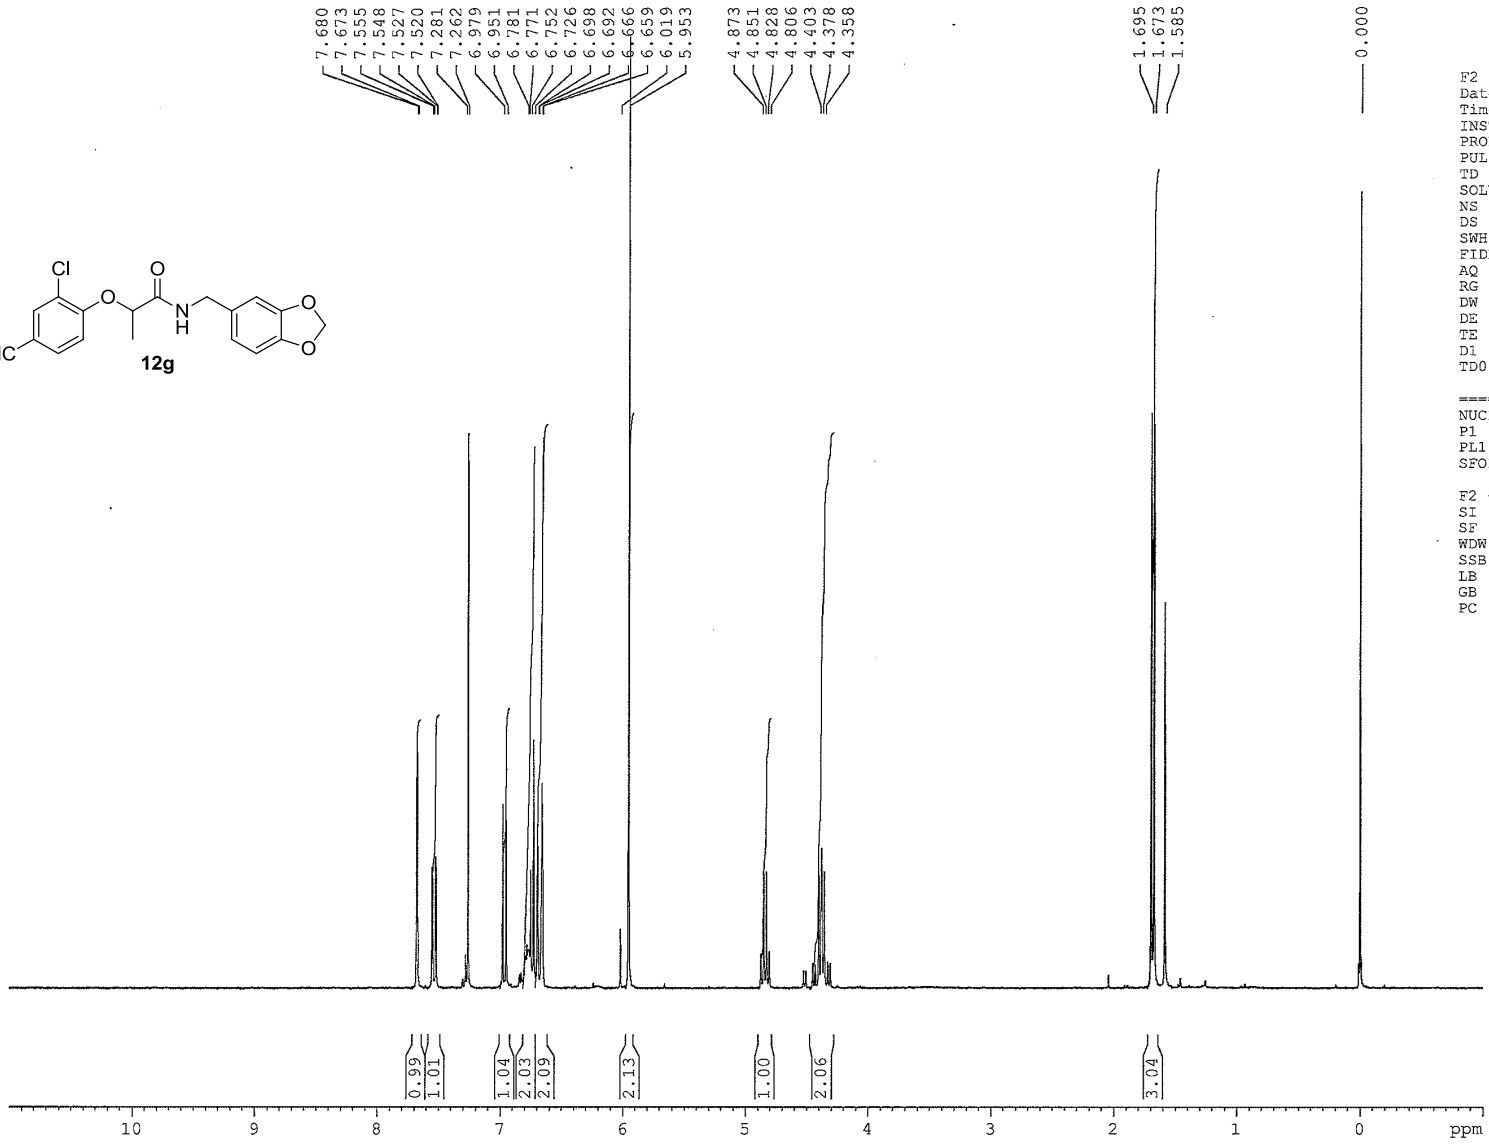

7.680  
7.673  
7.555  
7.548  
7.527  
7.520  
7.281  
7.262  
6.979  
6.951  
6.781  
6.771  
6.752  
6.726  
6.698  
6.692  
6.666  
6.659  
6.019  
5.953

4.873  
4.851  
4.828  
4.806  
4.403  
4.378  
4.358

1.695  
1.673  
1.585

0.000

F2 - Acquisition Parameters  
 Date\_ 20100802  
 Time\_ 14.25  
 INSTRUM spect  
 PROBHD 5 mm BBO BB-1H  
 PULPROG zg30  
 TD 65536  
 SOLVENT CDCl3  
 NS 16  
 DS 2  
 SWH 6172.839 Hz  
 FIDRES 0.094190 Hz  
 AQ 5.3084660 sec  
 RG 2048  
 DW 81.000 usec  
 DE 6.50 usec  
 TE 298.2 K  
 D1 1.00000000 sec  
 TD0 1

----- CHANNEL f1 -----  
 NUC1 1H  
 P1 10.00 usec  
 PL1 9.20 dB  
 SFO1 299.5718500 MHz

F2 - Processing parameters  
 SI 32768  
 SF 299.5700024 MHz  
 WDW EM  
 SSB 0  
 LB 0.30 Hz  
 GB 0  
 PC 1.00

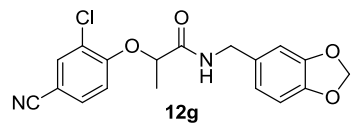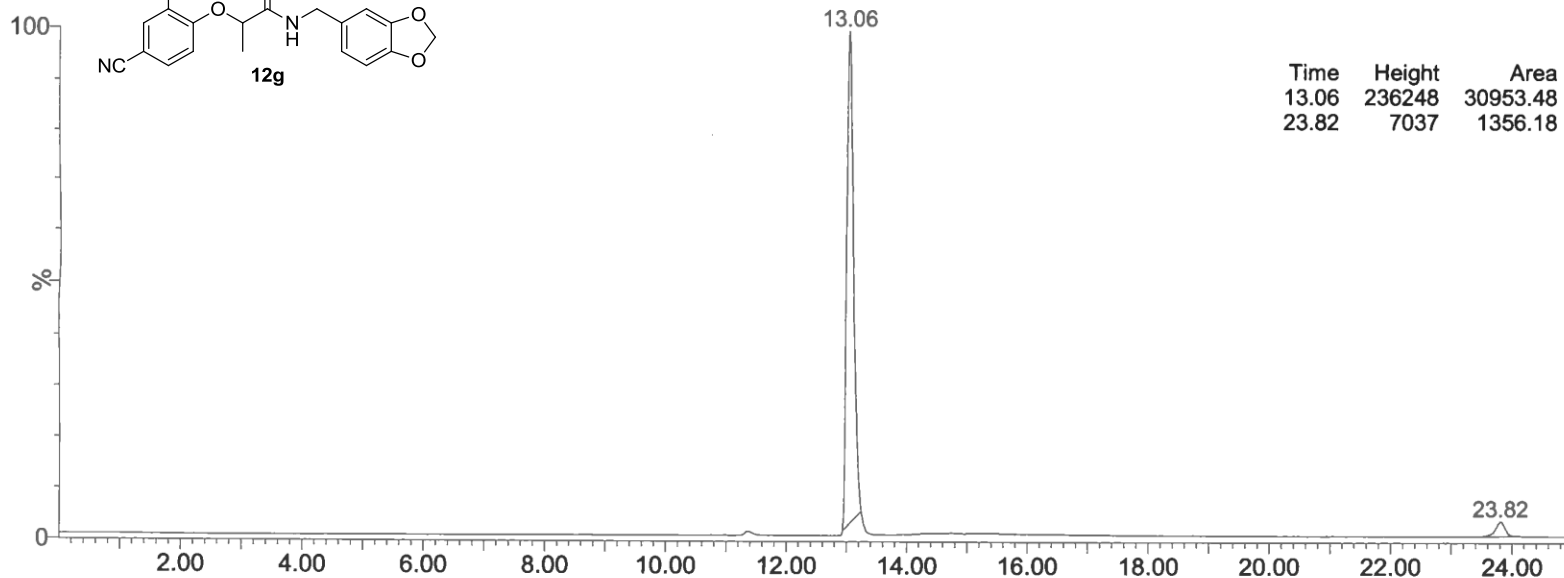

| ELSD   |        |          |       |
|--------|--------|----------|-------|
| An2    |        |          |       |
| 2.45e5 |        |          |       |
| Time   | Height | Area     | Area% |
| 13.06  | 236248 | 30953.48 | 95.80 |
| 23.82  | 7037   | 1356.18  | 4.20  |

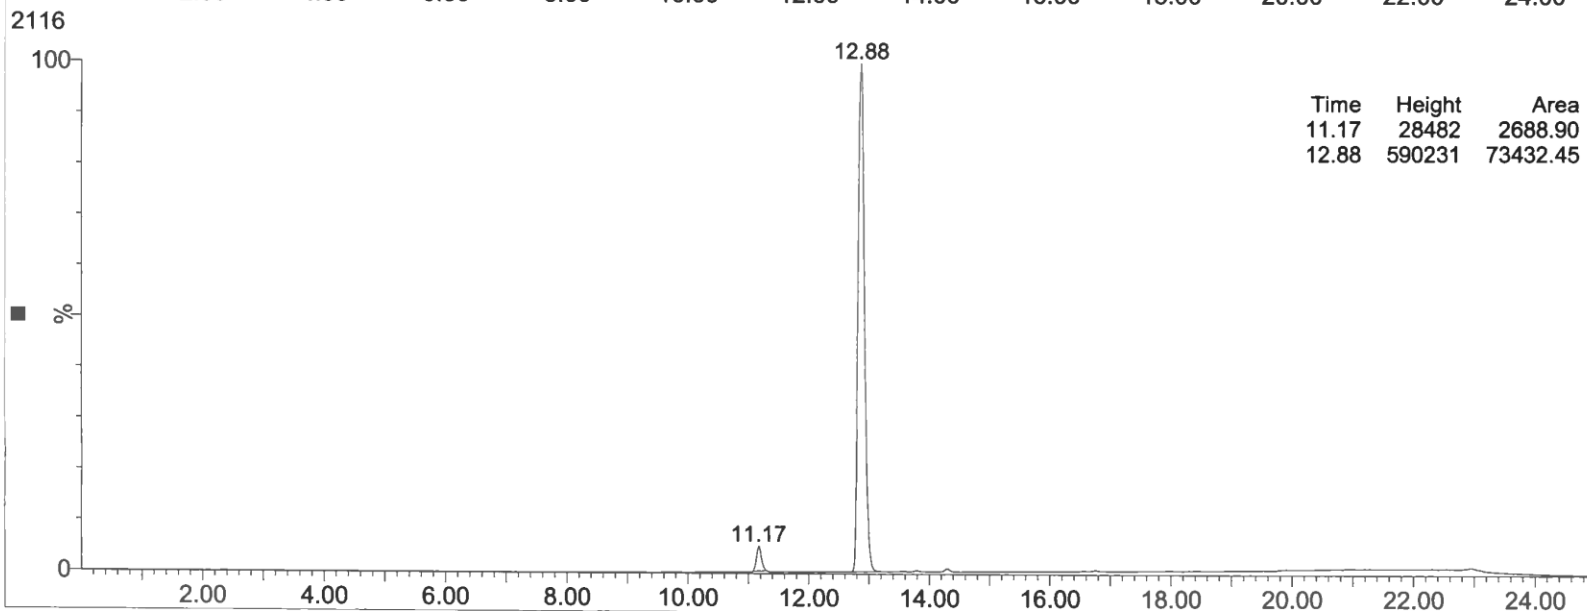

| UV     |        |          |       |
|--------|--------|----------|-------|
| An1    |        |          |       |
| 5.92e5 |        |          |       |
| Time   | Height | Area     | Area% |
| 11.17  | 28482  | 2688.90  | 3.53  |
| 12.88  | 590231 | 73432.45 | 96.47 |

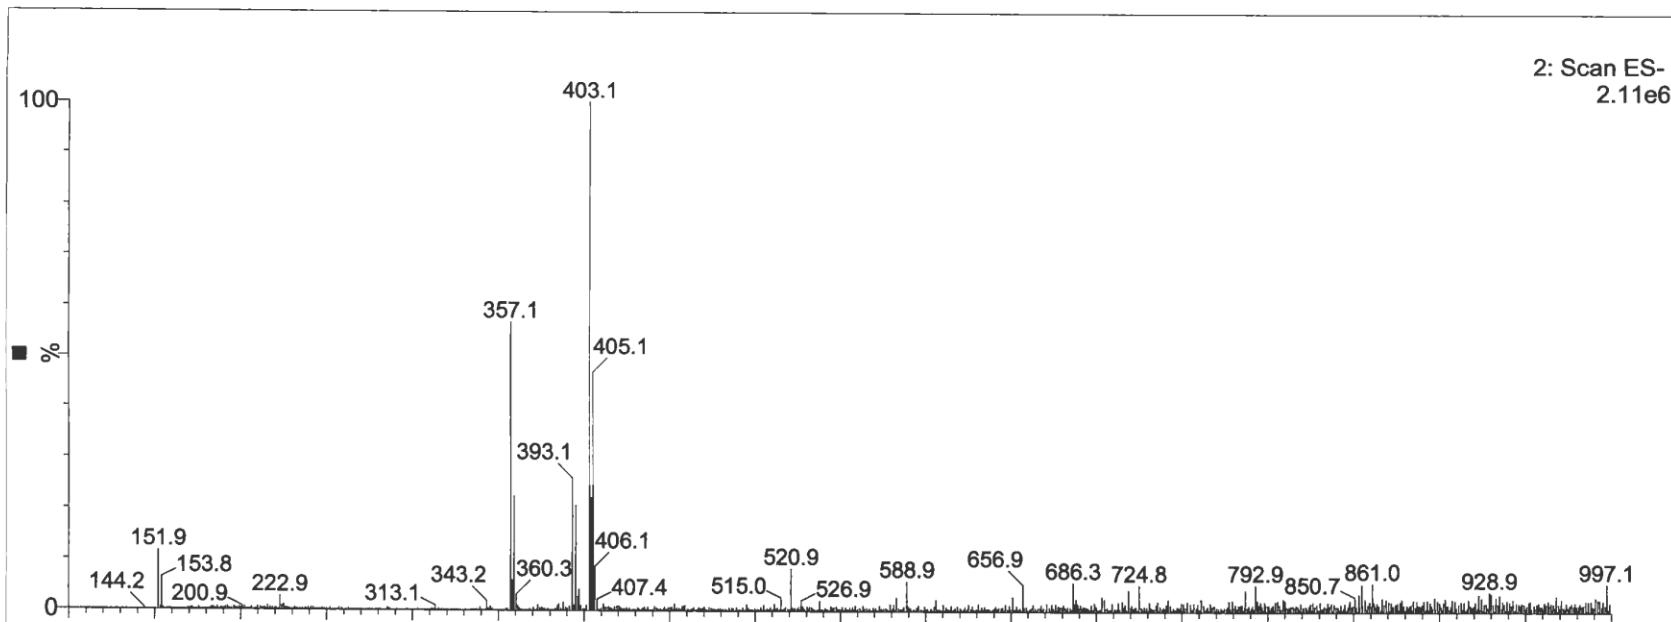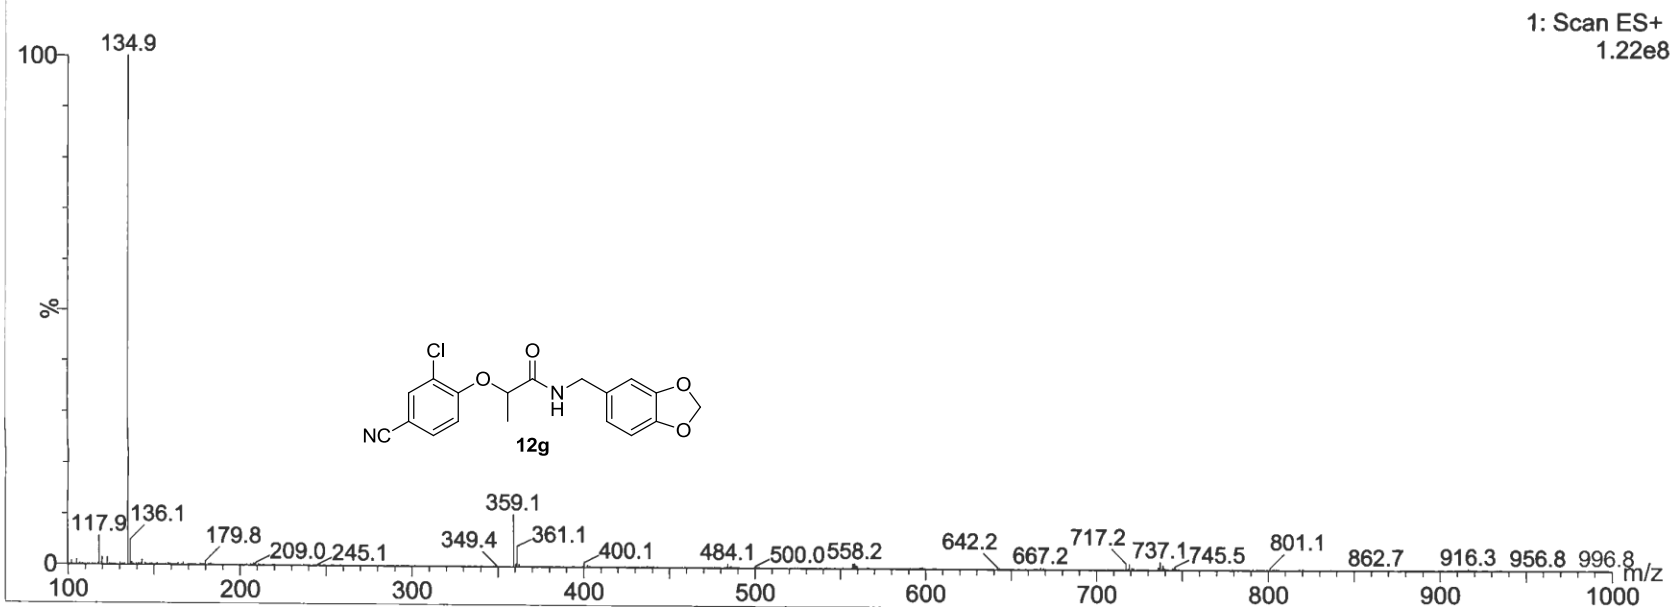

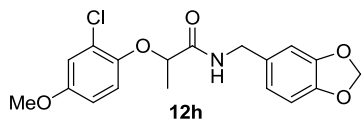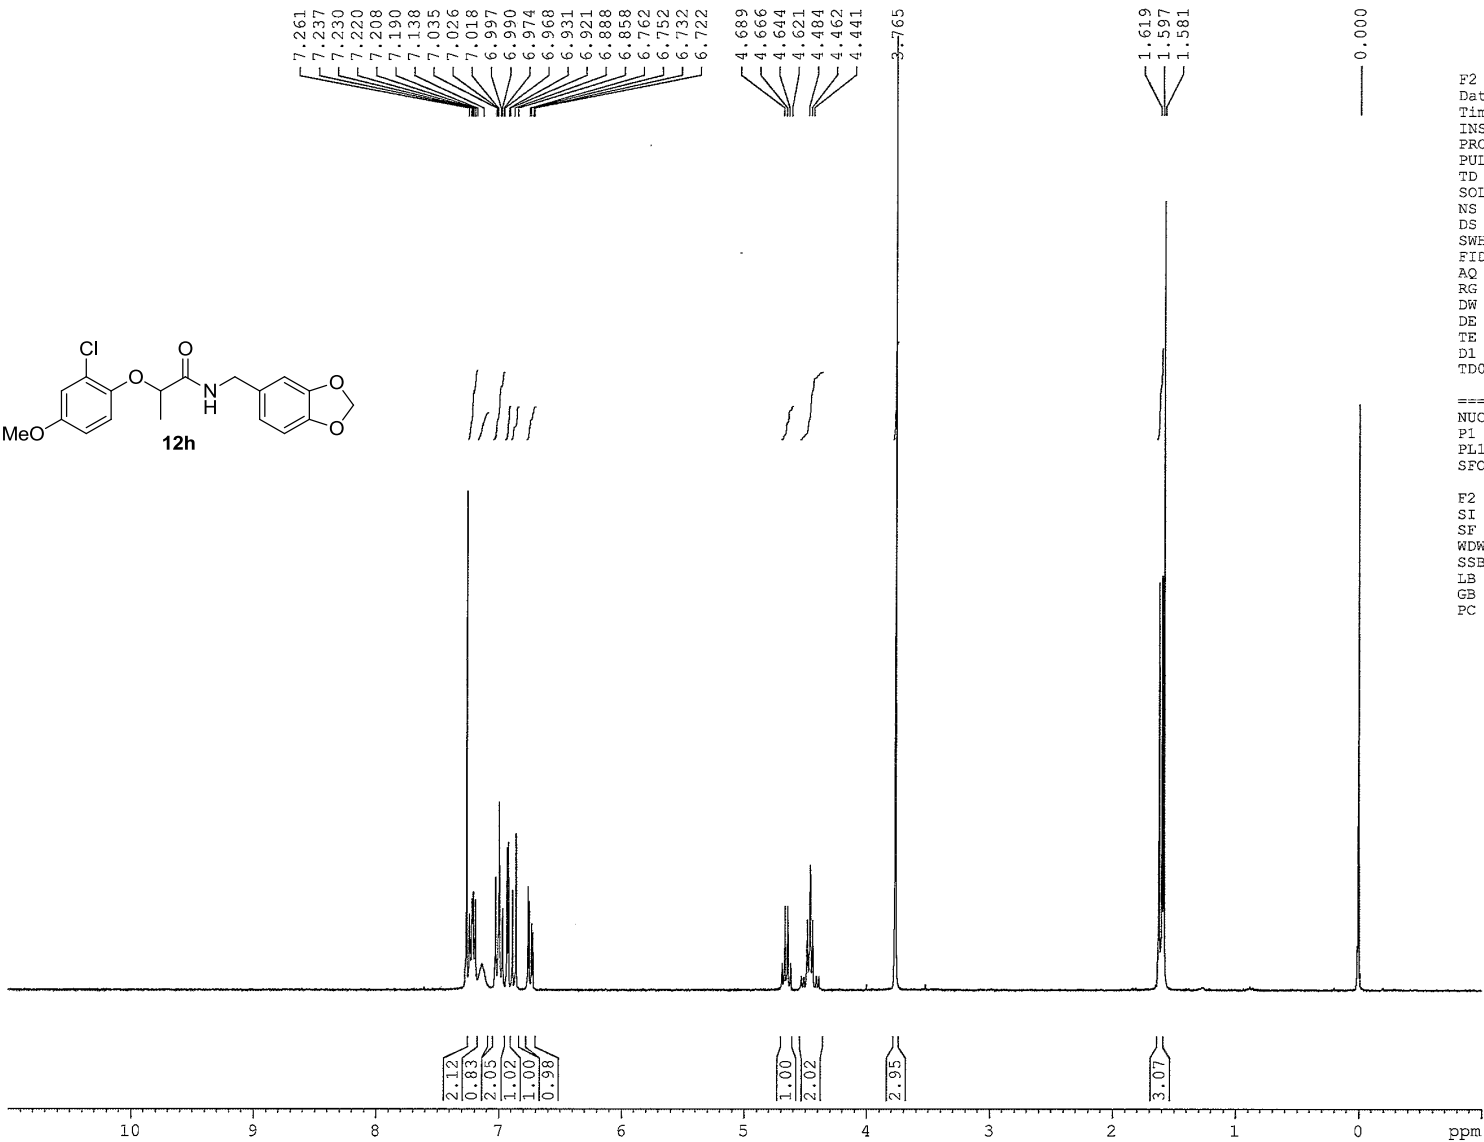

F2 - Acquisition Parameters  
 Date\_ 20100625  
 Time\_ 11.20  
 INSTRUM spect  
 PROBHD 5 mm BBO BB-1H  
 PULPROG zg30  
 TD 65536  
 SOLVENT CDCl3  
 NS 16  
 DS 2  
 SWH 6172.839 Hz  
 FIDRES 0.094190 Hz  
 AQ 5.3084660 sec  
 RG 2298.8  
 DW 81.000 usec  
 DE 6.50 usec  
 TE 298.2 K  
 D1 1.00000000 sec  
 TDO 1

===== CHANNEL f1 =====  
 NUC1 1H  
 P1 10.00 usec  
 PL1 9.20 dB  
 SFO1 299.5718500 MHz

F2 - Processing parameters  
 SI 32768  
 SF 299.5700024 MHz  
 WDW EM  
 SSB 0  
 LB 0.30 Hz  
 GB 0  
 PC 1.00

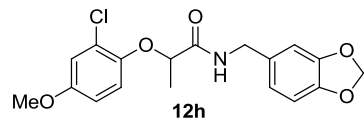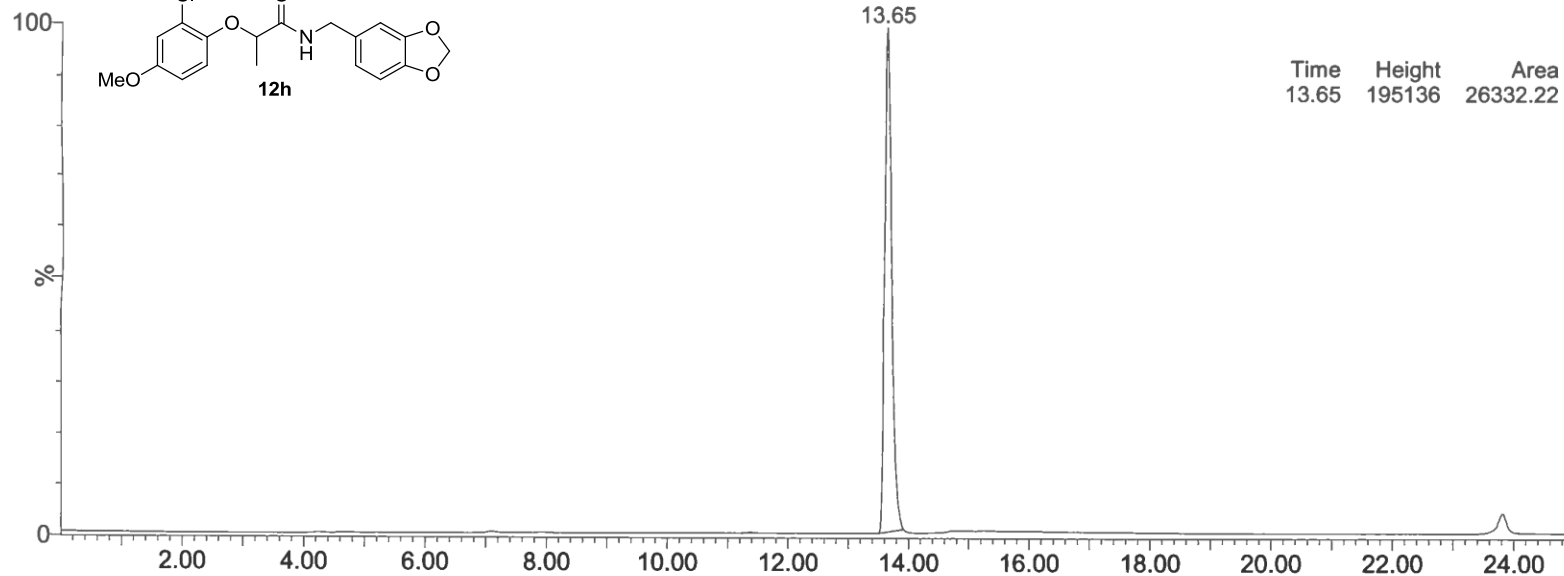

ELSD  
An2  
1.97e5  
Area%

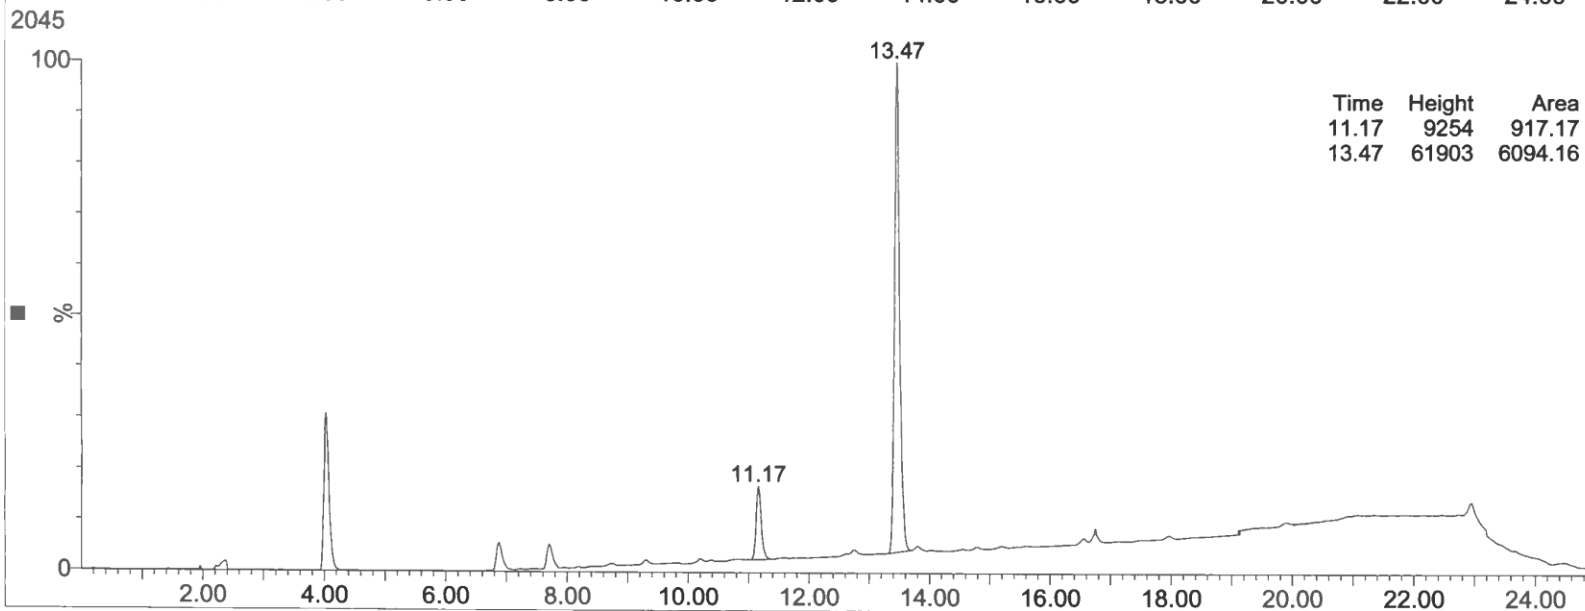

UV  
An1  
6.45e4  
Area%

1: Scan ES+  
4.35e7

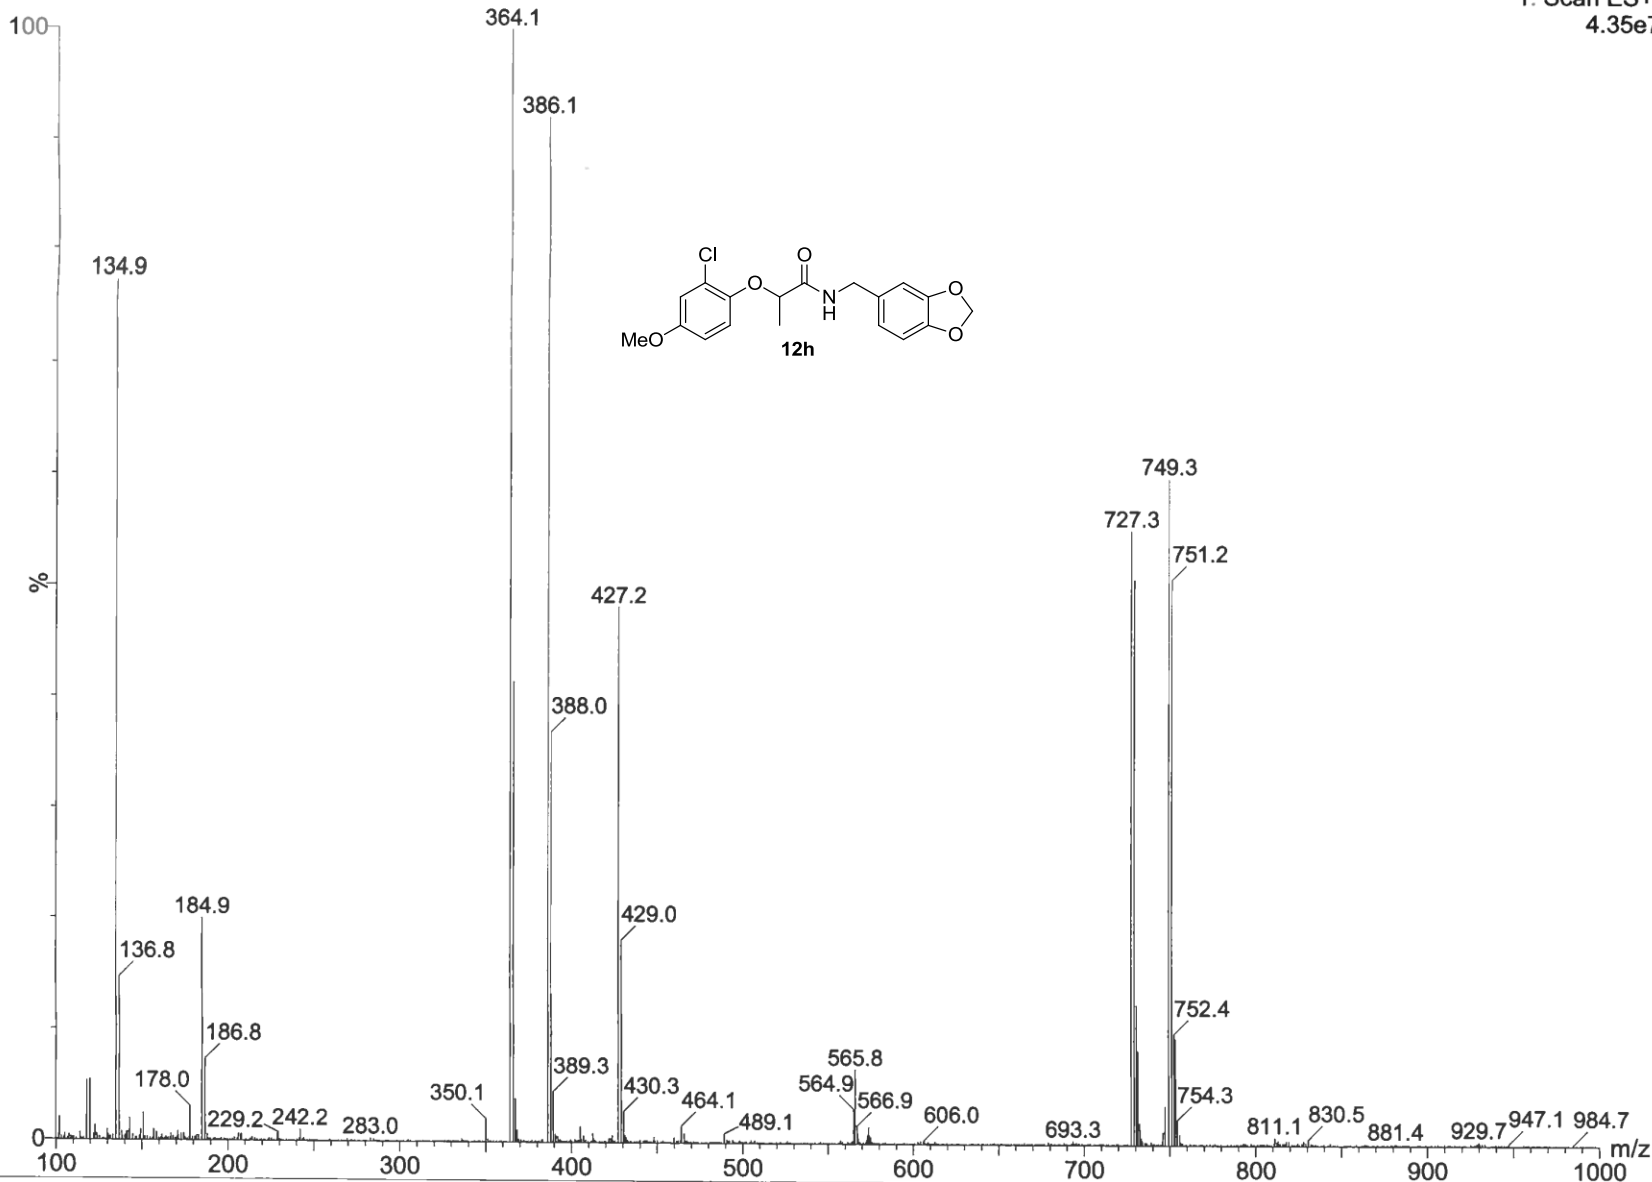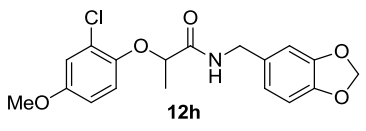

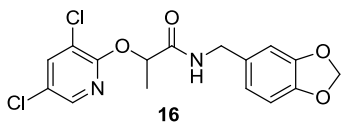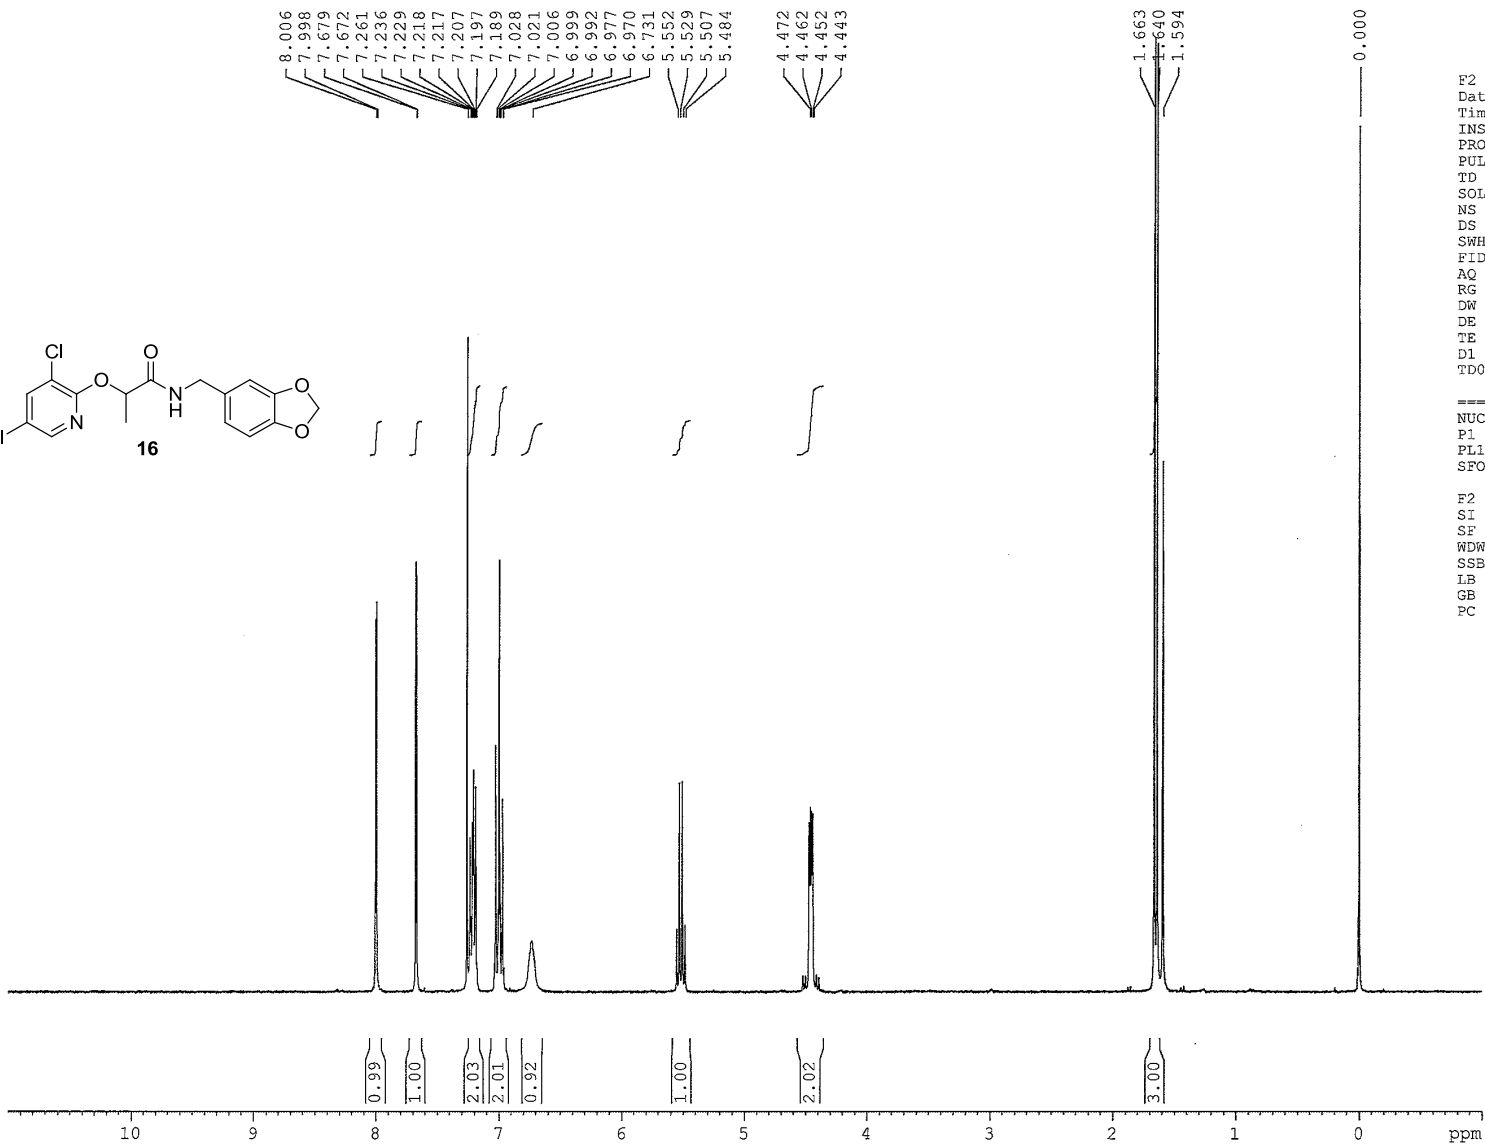

F2 - Acquisition Parameters  
 Date\_ 20100921  
 Time\_ 15.58  
 INSTRUM spect  
 PROBHD 5 mm BBO BB-1H  
 PULPROG zg30  
 TD 65536  
 SOLVENT CDCl3  
 NS 16  
 DS 2  
 SWH 6172.839 Hz  
 FIDRES 0.094190 Hz  
 AQ 5.3084660 sec  
 RG 1625.5  
 DW 81.000 usec  
 DE 6.50 usec  
 TE 298.2 K  
 D1 1.00000000 sec  
 TD0 1

----- CHANNEL f1 -----  
 NUC1 1H  
 P1 10.00 usec  
 PL1 9.20 dB  
 SFO1 299.5718500 MHz

F2 - Processing parameters  
 SI 32768  
 SF 299.5700028 MHz  
 WDW EM  
 SSB 0  
 LB 0.30 Hz  
 GB 0  
 PC 1.00



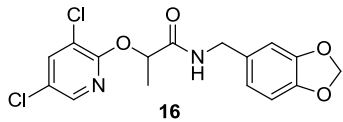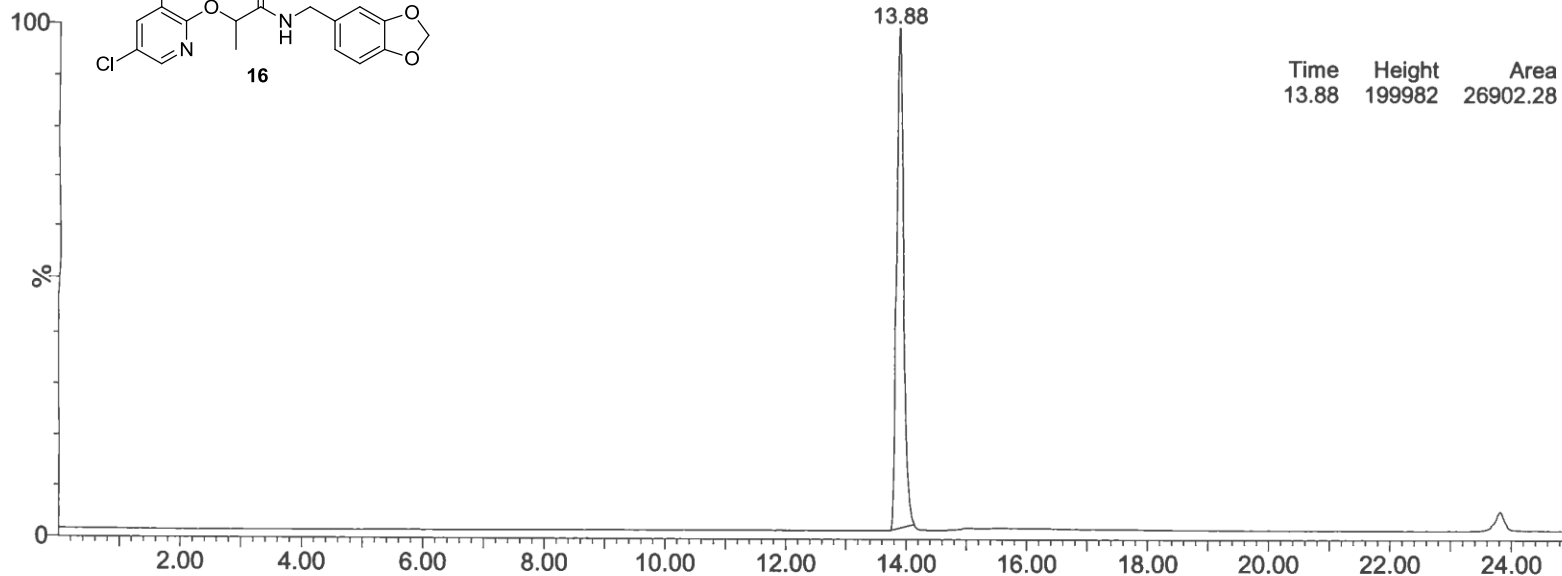

ELSD  
An2  
2.04e5

| Time  | Height | Area     | Area%  |
|-------|--------|----------|--------|
| 13.88 | 199982 | 26902.28 | 100.00 |

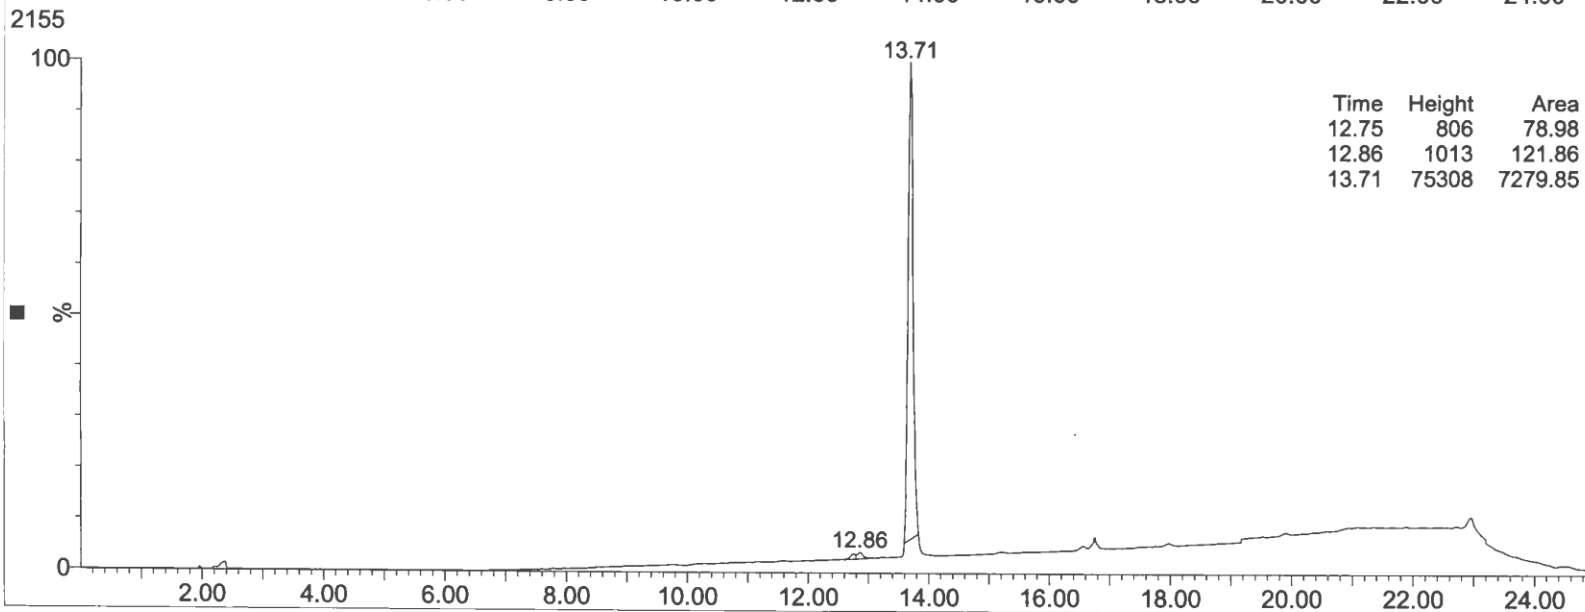

UV  
An1  
8.06e4

| Time  | Height | Area    | Area% |
|-------|--------|---------|-------|
| 12.75 | 806    | 78.98   | 1.06  |
| 12.86 | 1013   | 121.86  | 1.63  |
| 13.71 | 75308  | 7279.85 | 97.32 |

1: Scan ES+  
1.22e8

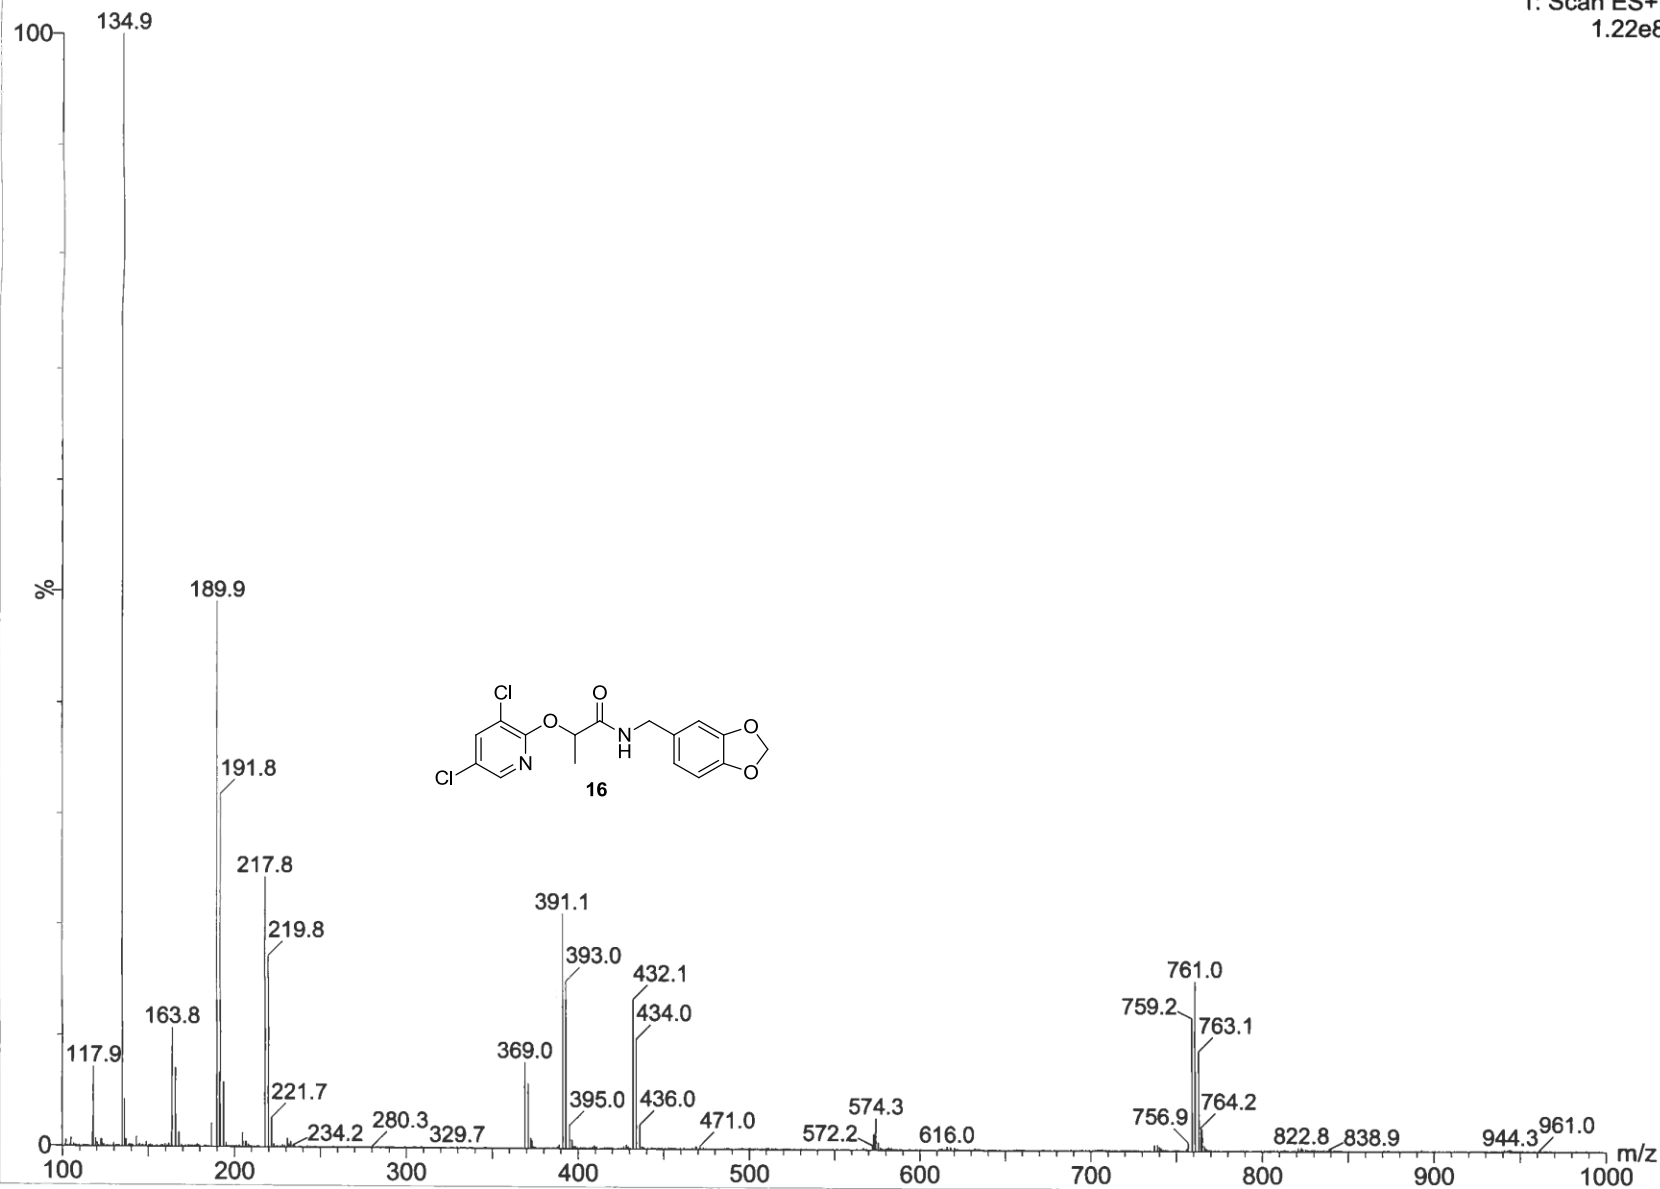

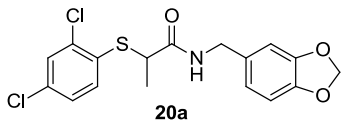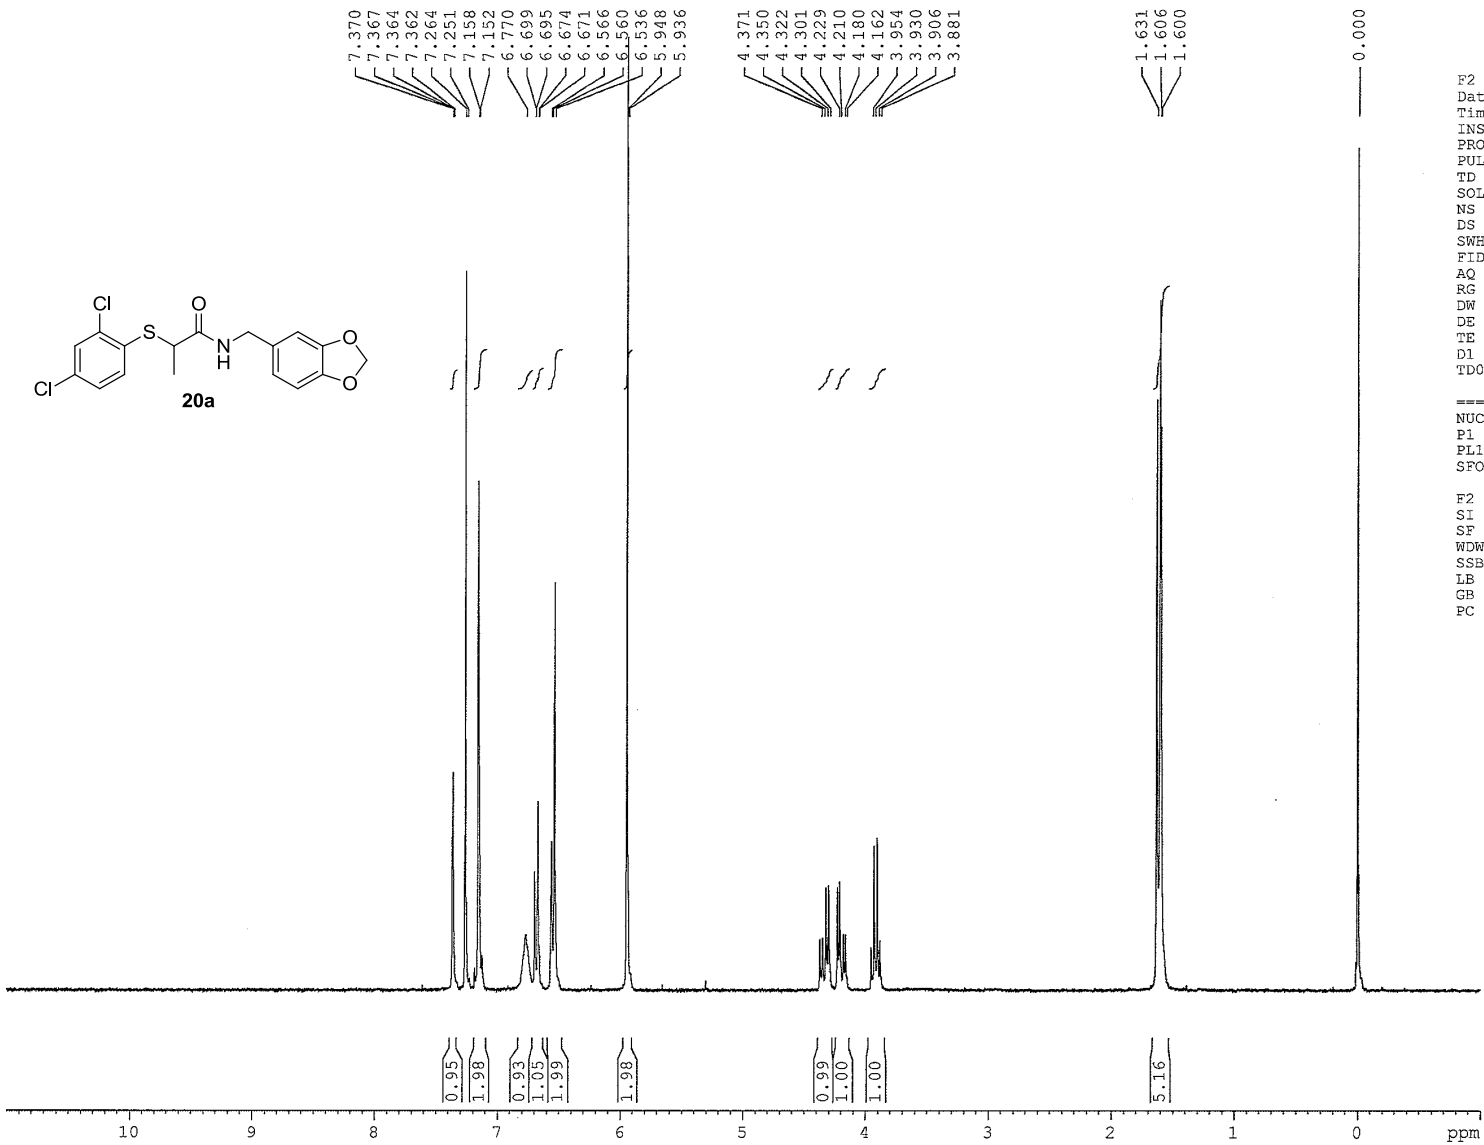

F2 - Acquisition Parameters  
 Date\_ 20100928  
 Time\_ 13.53  
 INSTRUM spect  
 PROBHD 5 mm BBO BB-1H  
 PULPROG zg30  
 TD 65536  
 SOLVENT CDCl3  
 NS 16  
 DS 2  
 SWH 6172.839 Hz  
 FIDRES 0.094190 Hz  
 AQ 5.3084660 sec  
 RG 1625.5  
 DW 81.000 usec  
 DE 6.50 usec  
 TE 294.4 K  
 D1 1.00000000 sec  
 TD0 1

----- CHANNEL f1 -----  
 NUC1 1H  
 P1 10.00 usec  
 PL1 9.20 dB  
 SFO1 299.5718500 MHz

F2 - Processing parameters  
 SI 32768  
 SF 299.5700022 MHz  
 WDW EM  
 SSB 0  
 LB 0.30 Hz  
 GB 0  
 PC 1.00

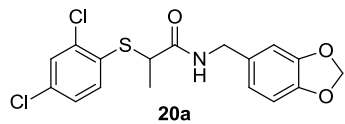

14.68

| Time  | Height | Area     | Area%  |
|-------|--------|----------|--------|
| 14.68 | 205099 | 28359.29 | 100.00 |

ELSD  
An2  
2.09e5

100

%

0

2.00 4.00 6.00 8.00 10.00 12.00 14.00 16.00 18.00 20.00 22.00 24.00

2161

14.51

| Time  | Height | Area     | Area%  |
|-------|--------|----------|--------|
| 14.51 | 359023 | 38938.64 | 100.00 |

UV  
An1  
3.62e5

100

%

0

2.00 4.00 6.00 8.00 10.00 12.00 14.00 16.00 18.00 20.00 22.00 24.00

Time

1: Scan ES+  
3.98e7

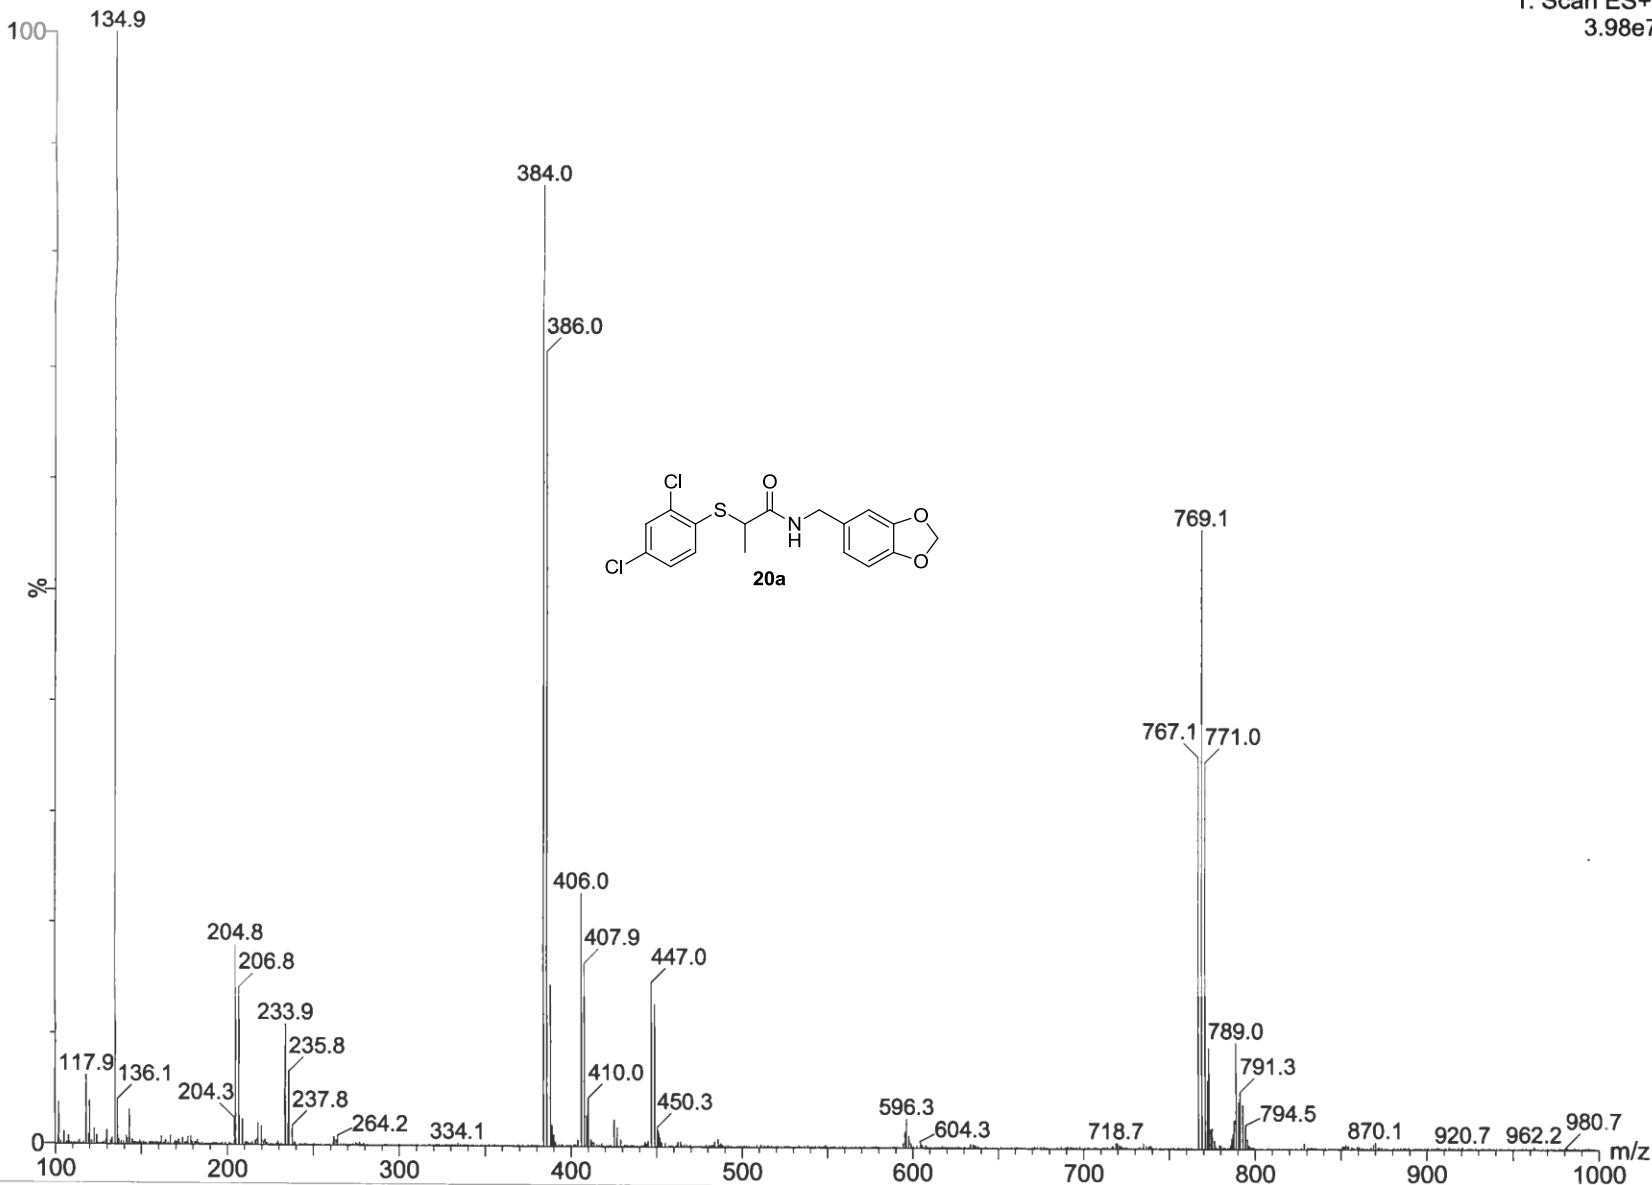

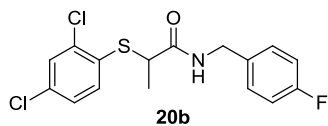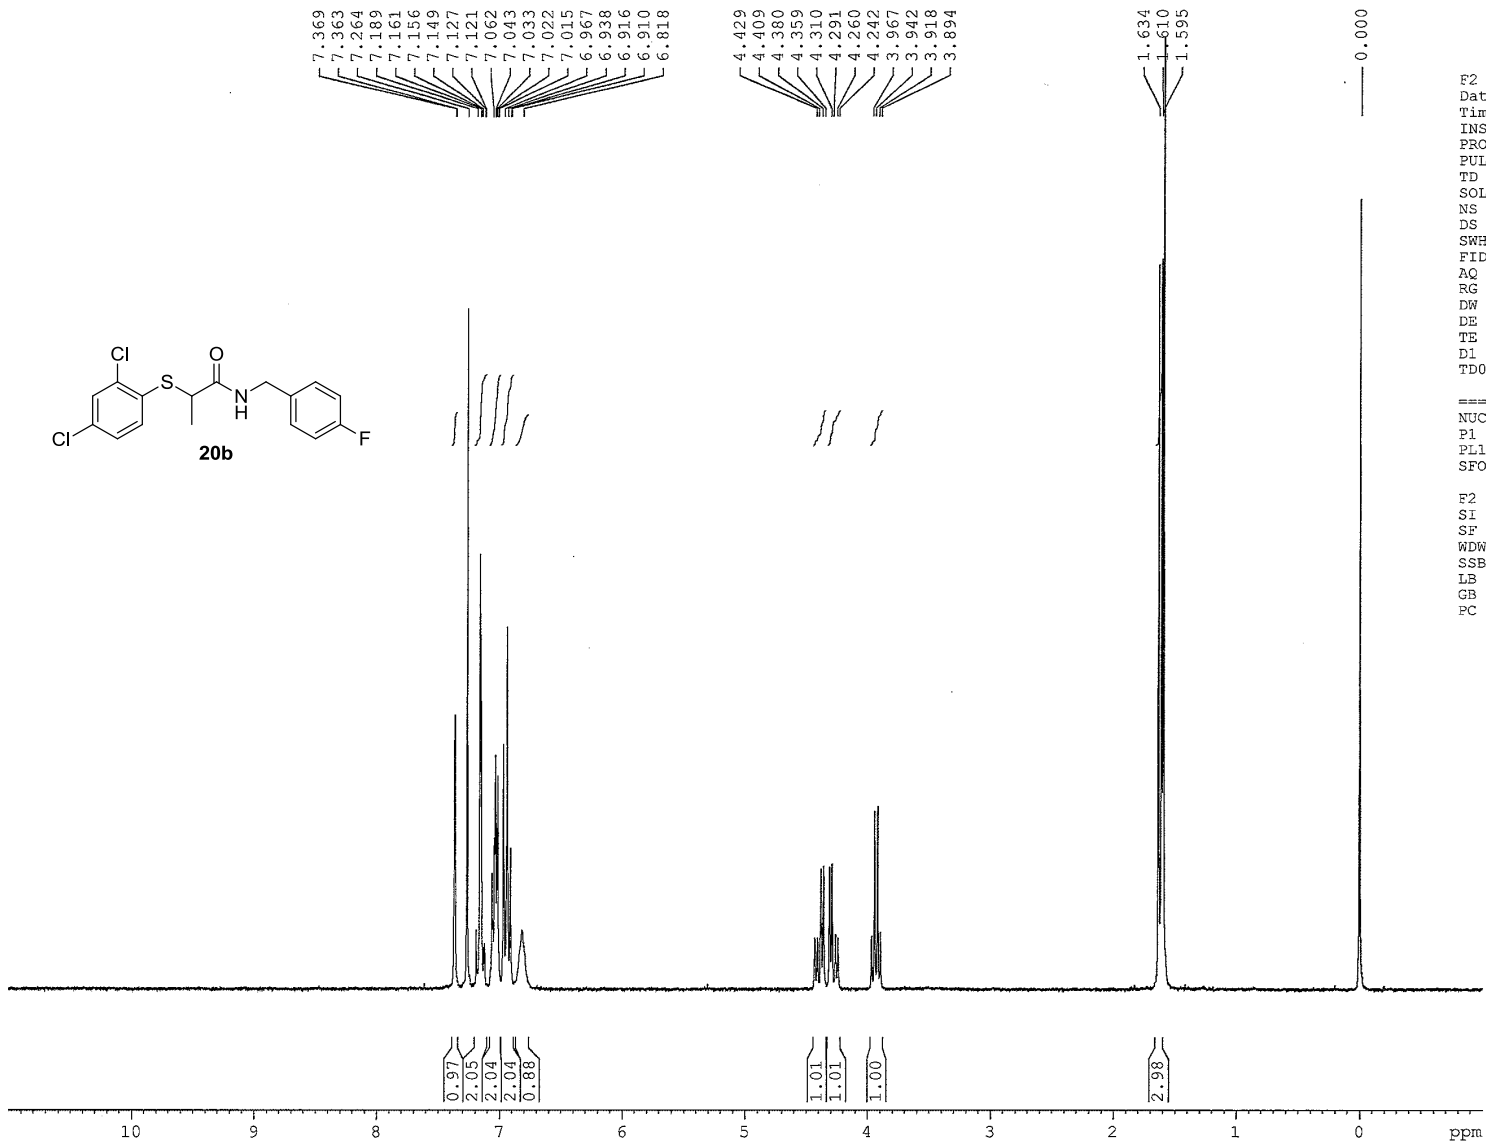

7.369  
7.363  
7.264  
7.189  
7.161  
7.156  
7.149  
7.127  
7.121  
7.062  
7.043  
7.033  
7.022  
7.015  
6.967  
6.938  
6.916  
6.910  
6.818

4.429  
4.409  
4.380  
4.359  
4.310  
4.291  
4.260  
4.242  
3.967  
3.942  
3.918  
3.894

1.634  
1.610  
1.595

0.000

F2 - Acquisition Parameters  
 Date\_ 20100928  
 Time 14.23  
 INSTRUM spect  
 PROBHD 5 mm BBO BB-1H  
 PULPROG zg30  
 TD 65536  
 SOLVENT CDCl3  
 NS 16  
 DS 2  
 SWH 6172.839 Hz  
 FIDRES 0.094190 Hz  
 AQ 5.3084660 sec  
 RG 1625.5  
 DW 81.000 usec  
 DE 6.50 usec  
 TE 294.5 K  
 D1 1.00000000 sec  
 TD0 1

===== CHANNEL f1 =====  
 NUC1 1H  
 P1 10.00 usec  
 PL1 9.20 dB  
 SFO1 299.5718500 MHz

F2 - Processing parameters  
 SI 32768  
 SF 299.5700019 MHz  
 WDW EM  
 SSB 0  
 LB 0.30 Hz  
 GB 0  
 PC 1.00

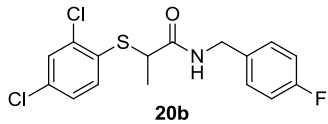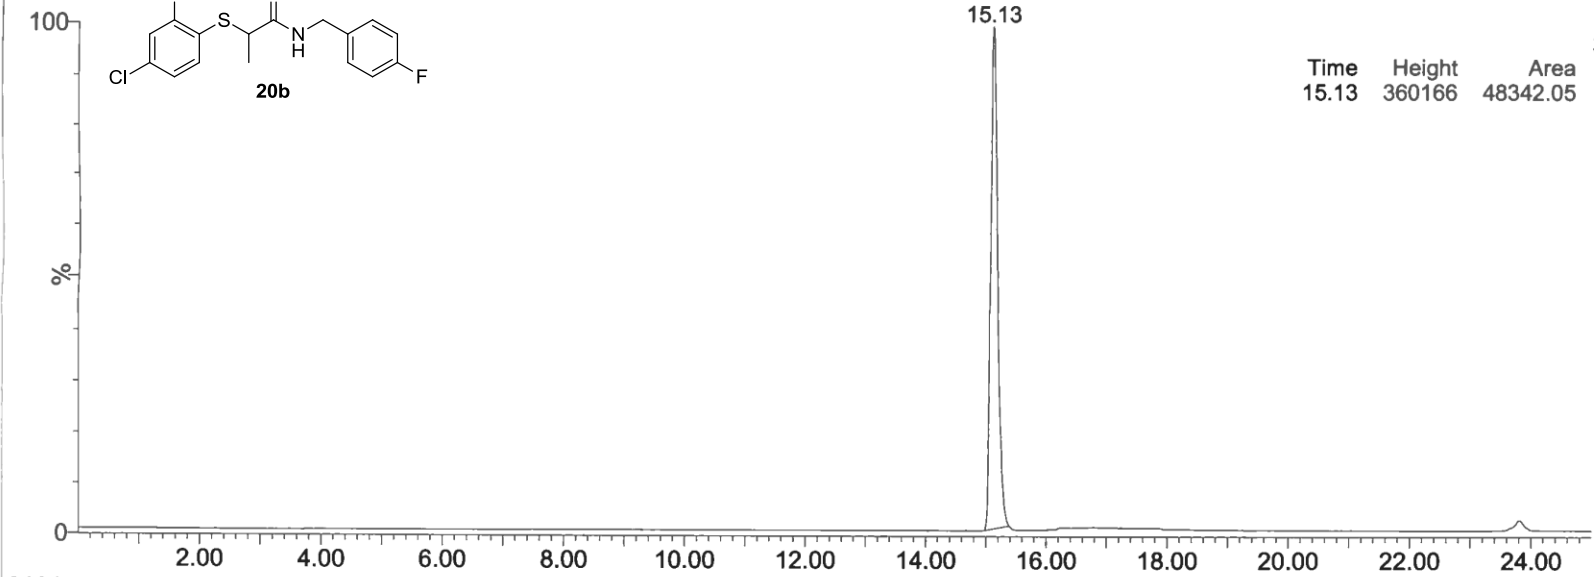

| Time  | Height | Area     | Area%  |
|-------|--------|----------|--------|
| 15.13 | 360166 | 48342.05 | 100.00 |

ELSD  
An2  
3.65e5

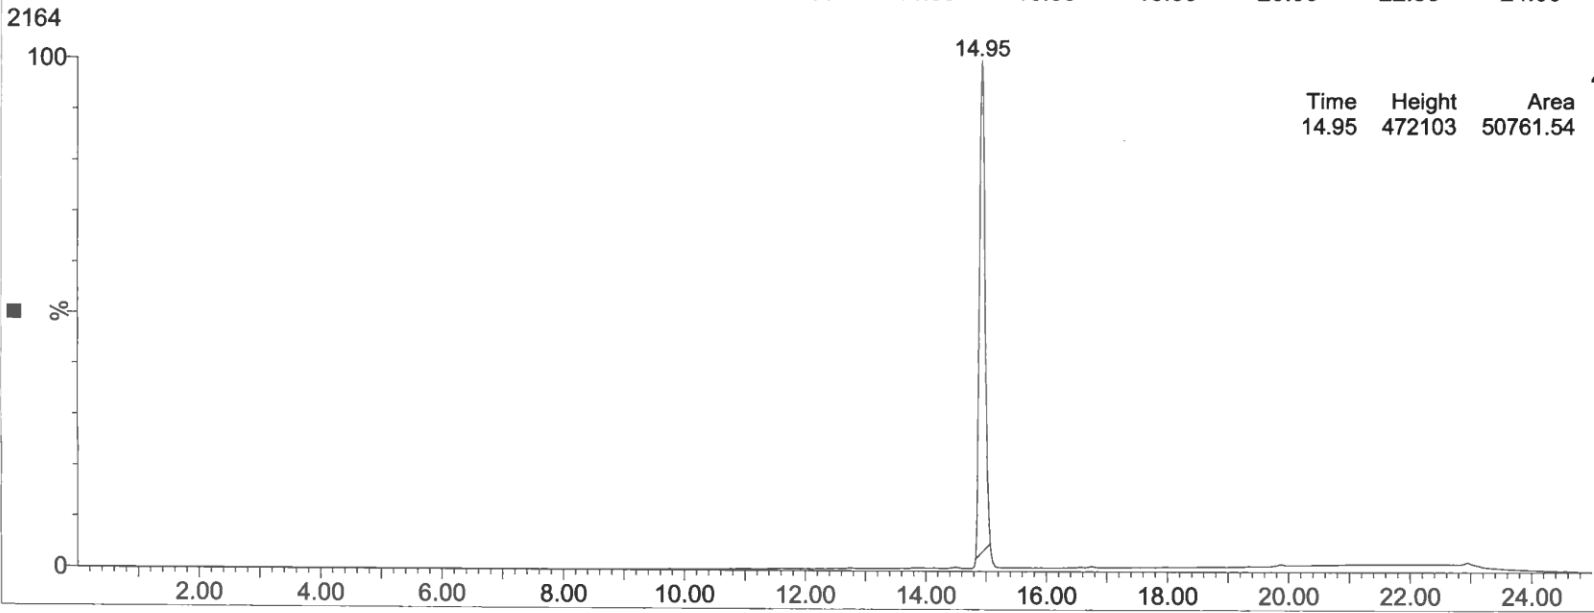

| Time  | Height | Area     | Area%  |
|-------|--------|----------|--------|
| 14.95 | 472103 | 50761.54 | 100.00 |

UV  
An1  
4.91e5

1: Scan ES+  
5.86e7

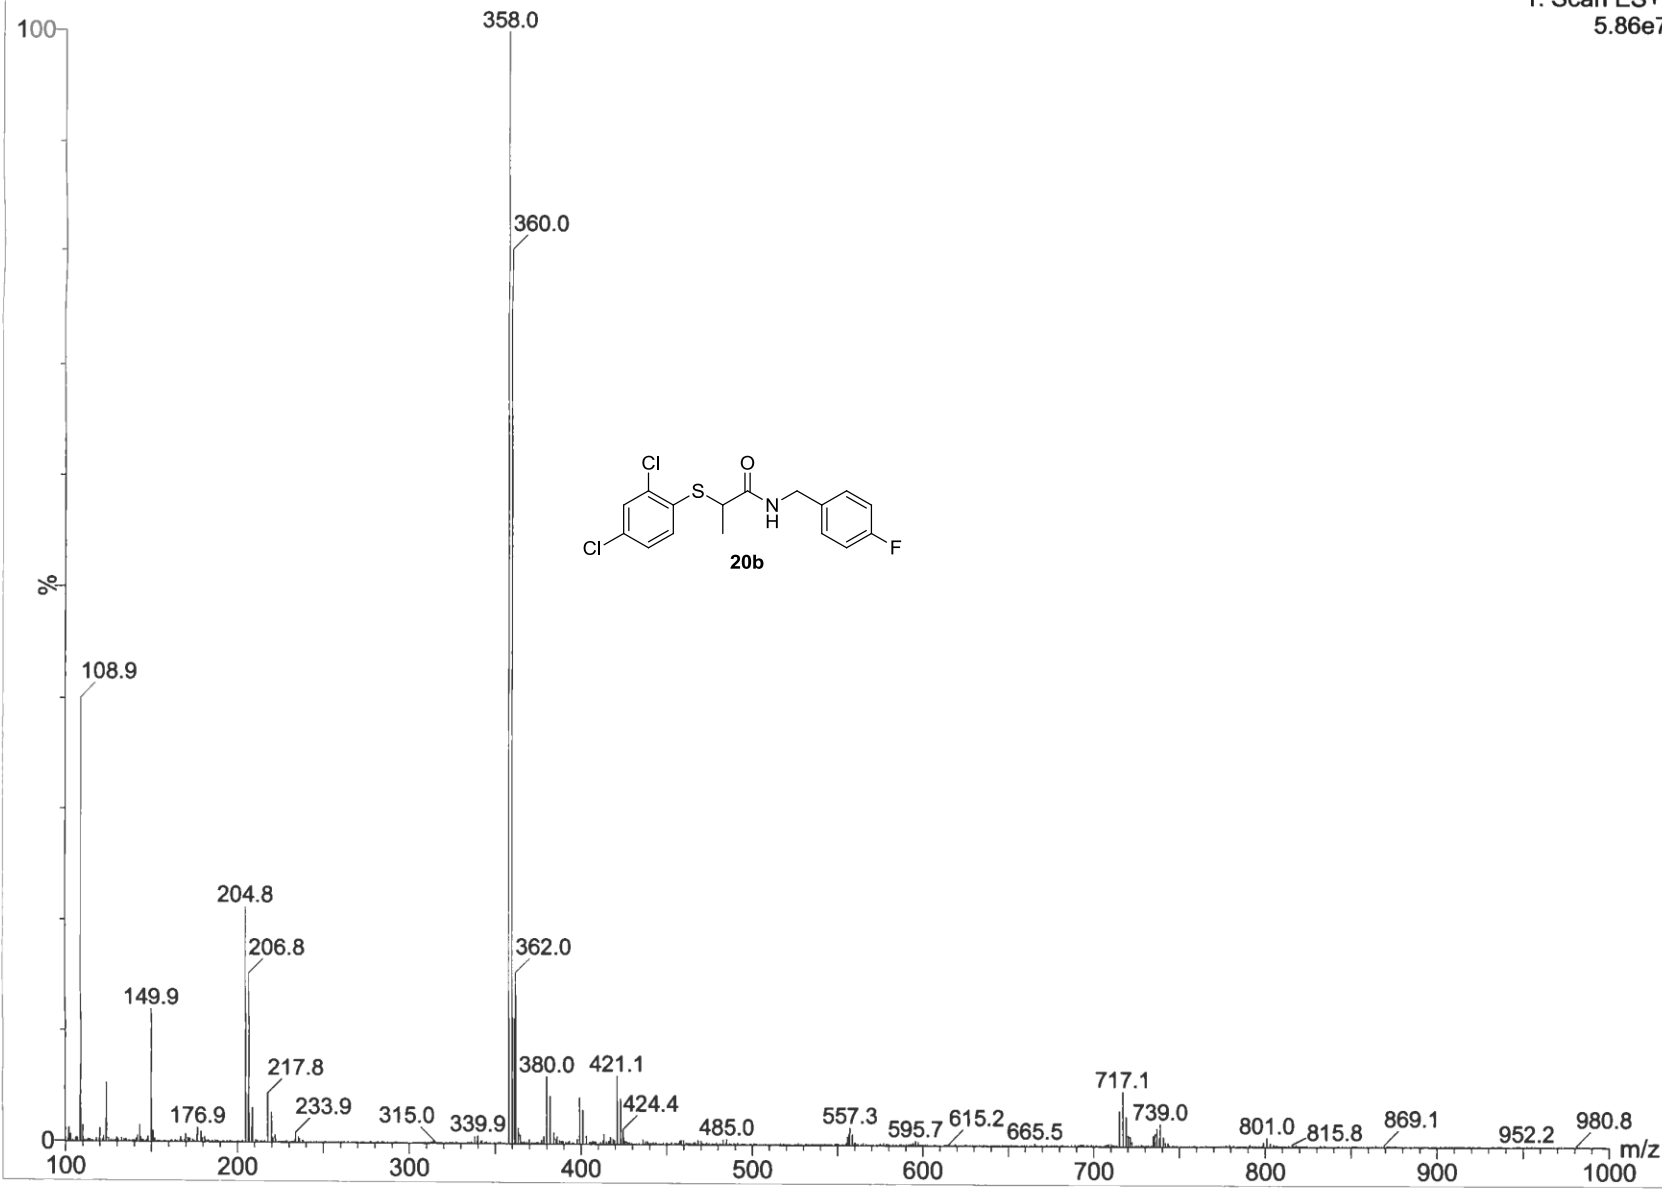



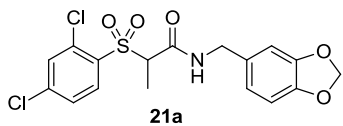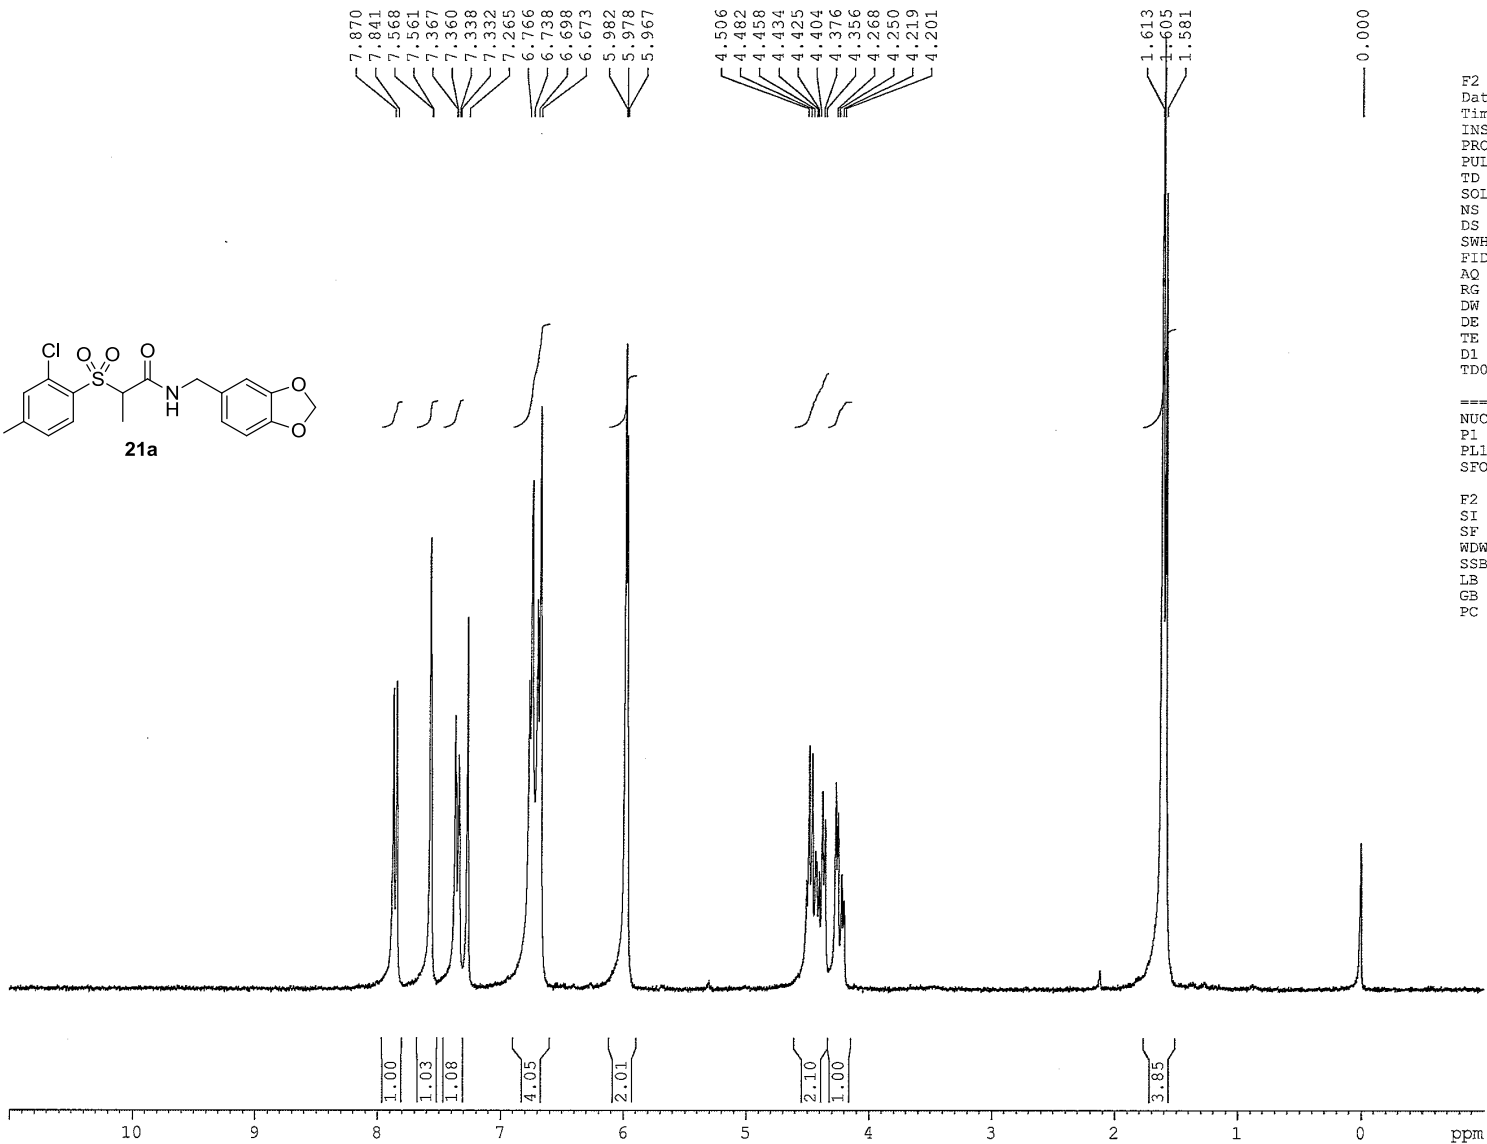

F2 - Acquisition Parameters  
 Date\_ 20101110  
 Time\_ 10.39  
 INSTRUM spect  
 PROBHD 5 mm BBO BB-1H  
 PULPROG zg30  
 TD 65536  
 SOLVENT CDCl3  
 NS 16  
 DS 2  
 SWH 6172.839 Hz  
 FIDRES 0.094190 Hz  
 AQ 5.3084660 sec  
 RG 1290.2  
 DW 81.000 usec  
 DE 6.50 usec  
 TE 294.5 K  
 D1 1.00000000 sec  
 TD0 1

===== CHANNEL f1 =====  
 NUC1 1H  
 P1 10.00 usec  
 PL1 9.20 dB  
 SFO1 299.5718500 MHz

F2 - Processing parameters  
 SI 32768  
 SF 299.5699999 MHz  
 WDW EM  
 SSB 0  
 LB 0.30 Hz  
 GB 0  
 PC 1.00

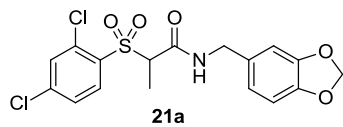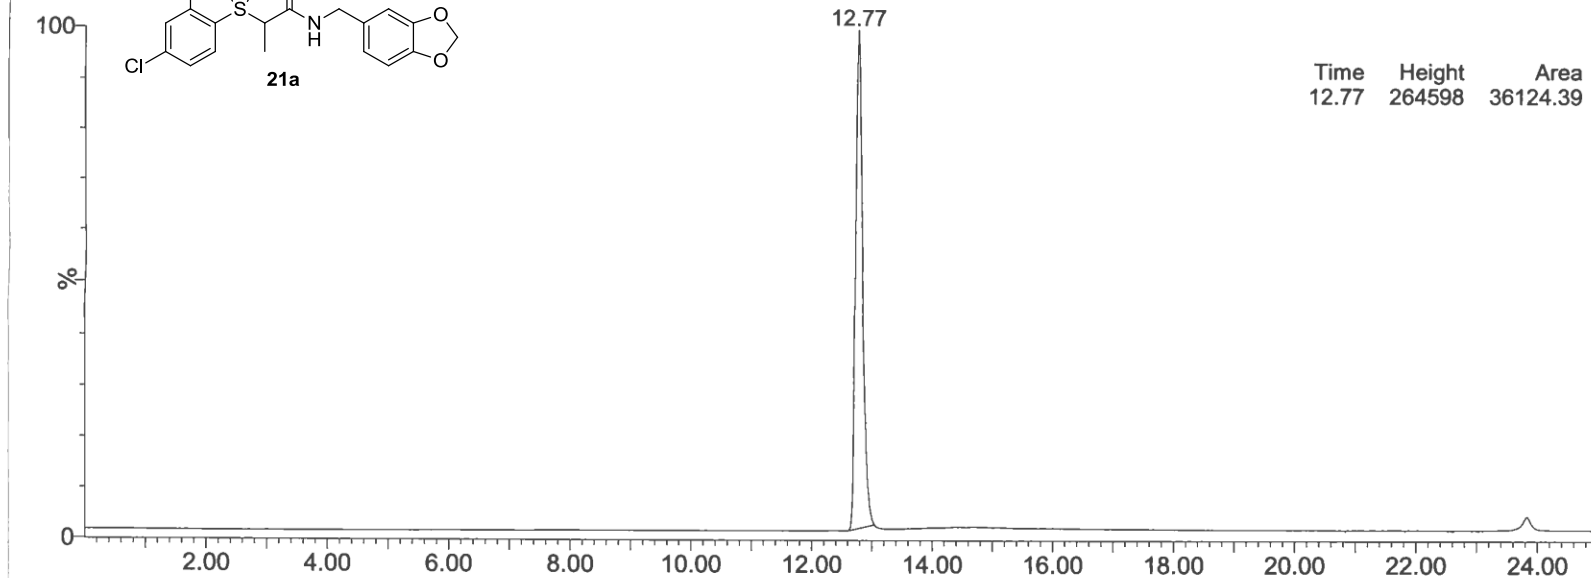

ELSD  
An2  
2.71e5

| Time  | Height | Area     | Area%  |
|-------|--------|----------|--------|
| 12.77 | 264598 | 36124.39 | 100.00 |

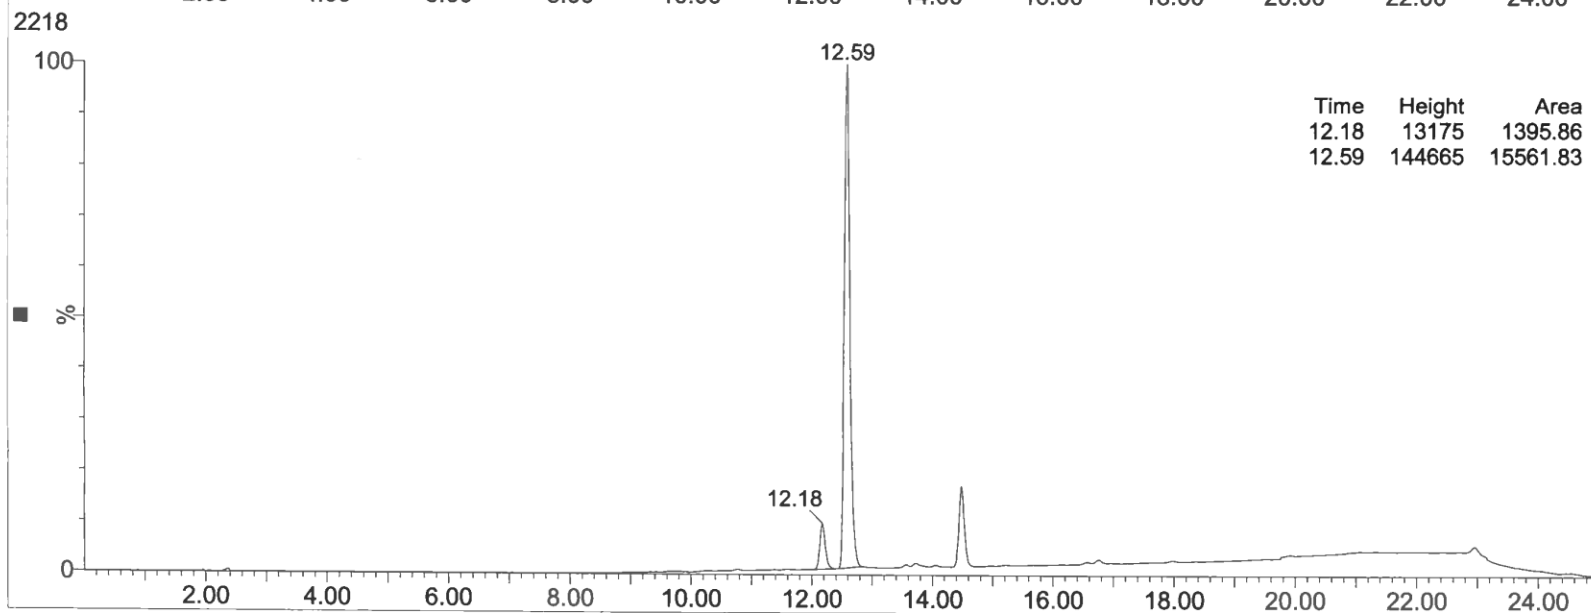

UV  
An1  
1.47e5

| Time  | Height | Area     | Area% |
|-------|--------|----------|-------|
| 12.18 | 13175  | 1395.86  | 8.23  |
| 12.59 | 144665 | 15561.83 | 91.77 |

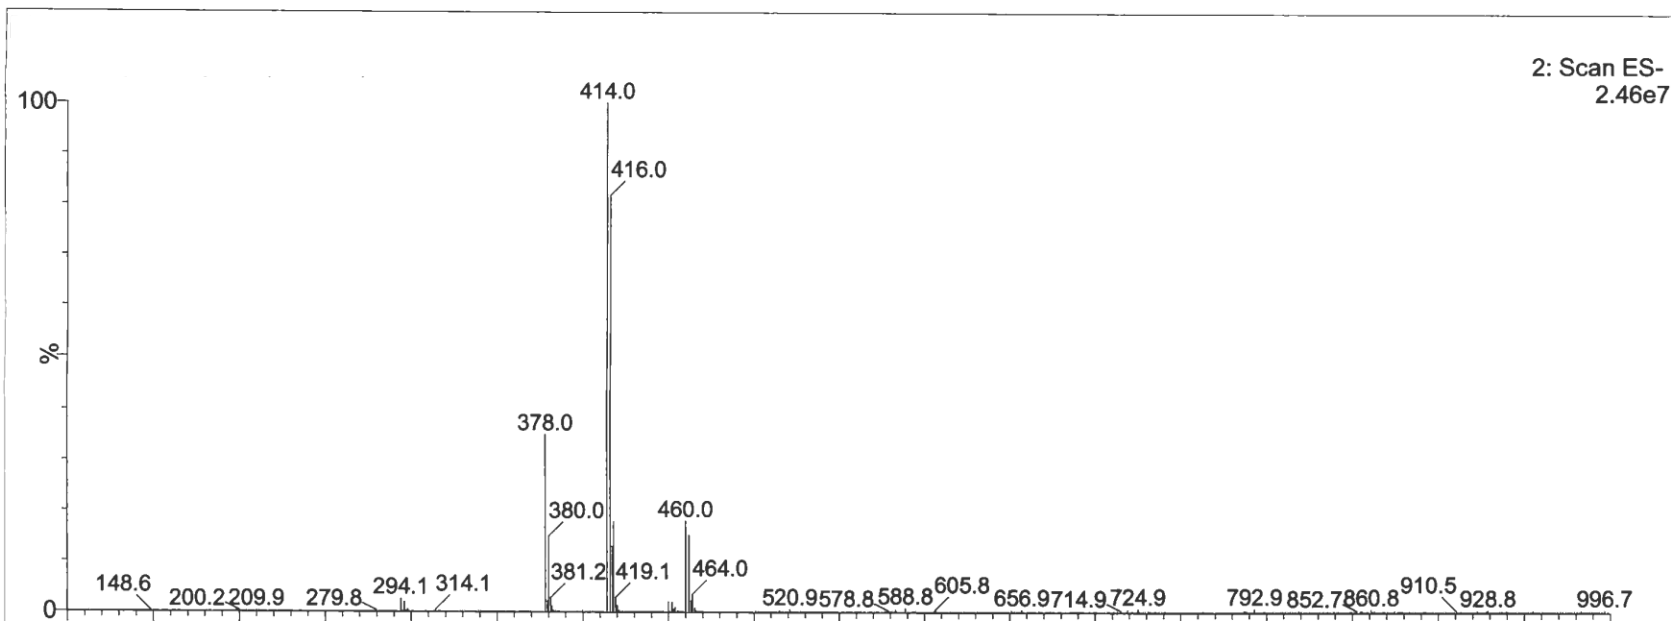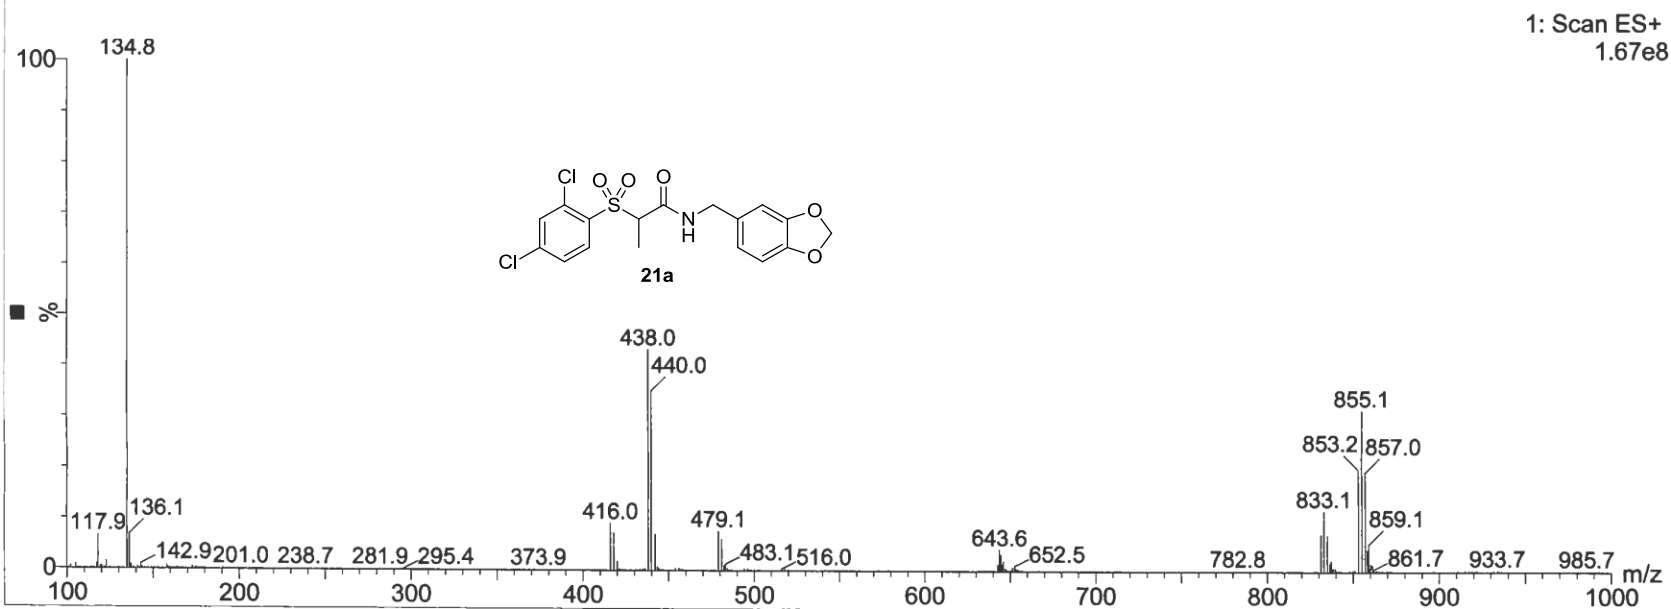

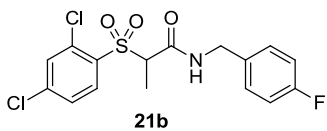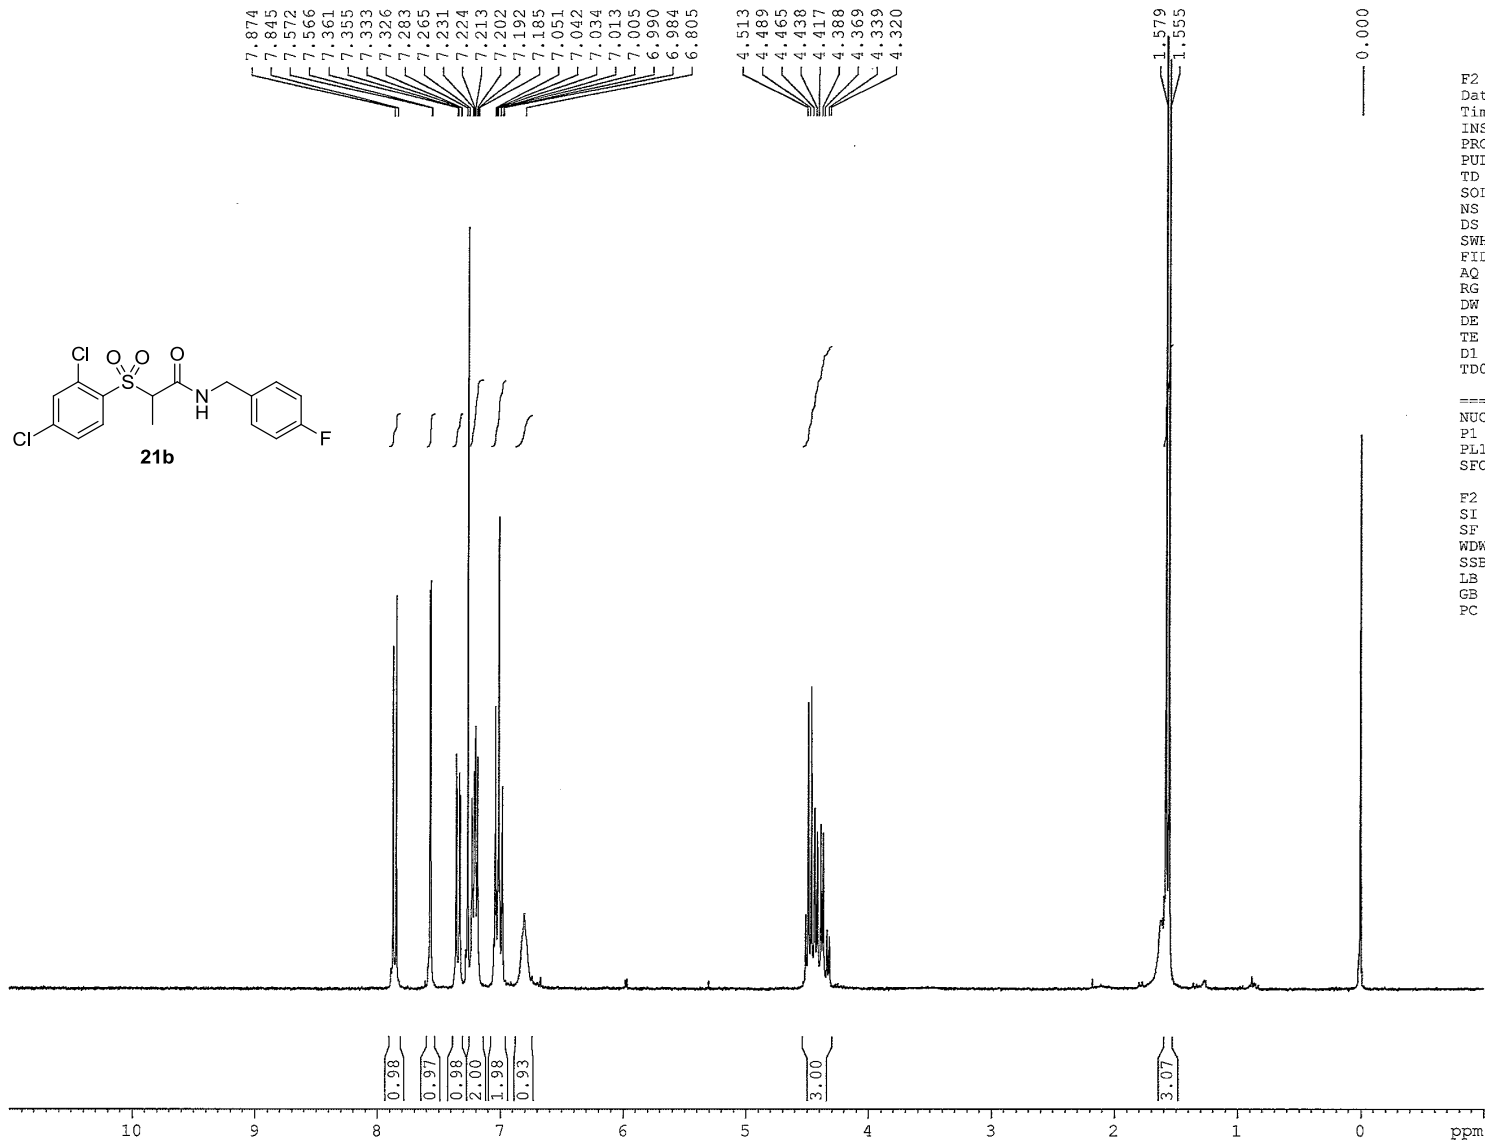

F2 - Acquisition Parameters  
 Date 20101101  
 Time 14.41  
 INSTRUM spect  
 PROBHD 5 mm BBO BB-1H  
 PULPROG zg30  
 TD 65536  
 SOLVENT CDCl3  
 NS 16  
 DS 2  
 SWH 6172.839 Hz  
 FIDRES 0.094190 Hz  
 AQ 5.3084660 sec  
 RG 1625.5  
 DW 81.000 usec  
 DE 6.50 usec  
 TE 293.0 K  
 D1 1.00000000 sec  
 TDO 1

===== CHANNEL f1 =====  
 NUC1 1H  
 P1 10.00 usec  
 PL1 9.20 dB  
 SF01 299.5718500 MHz

F2 - Processing parameters  
 SI 32768  
 SF 299.5700013 MHz  
 WDW EM  
 SSB 0  
 LB 0.30 Hz  
 GB 0  
 PC 1.00

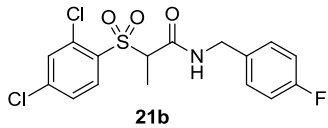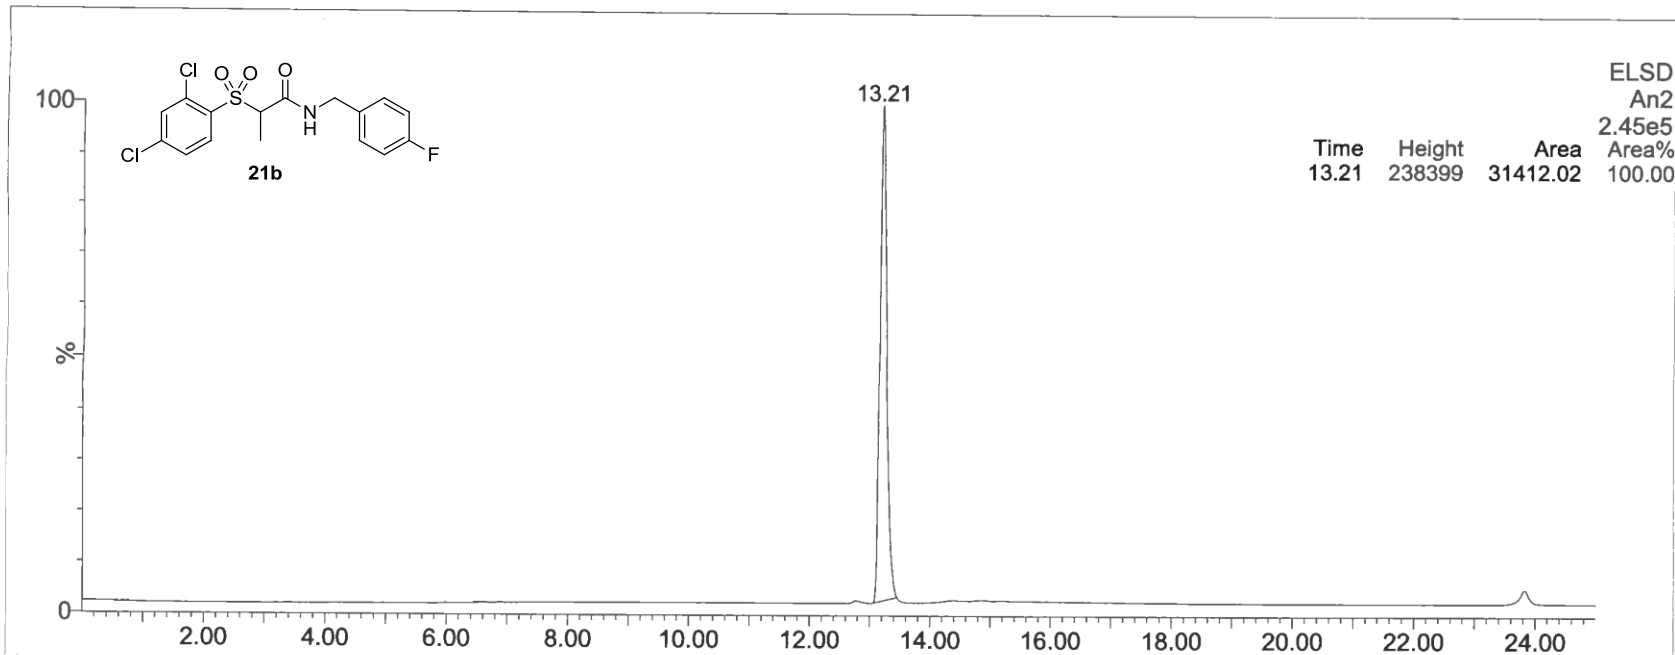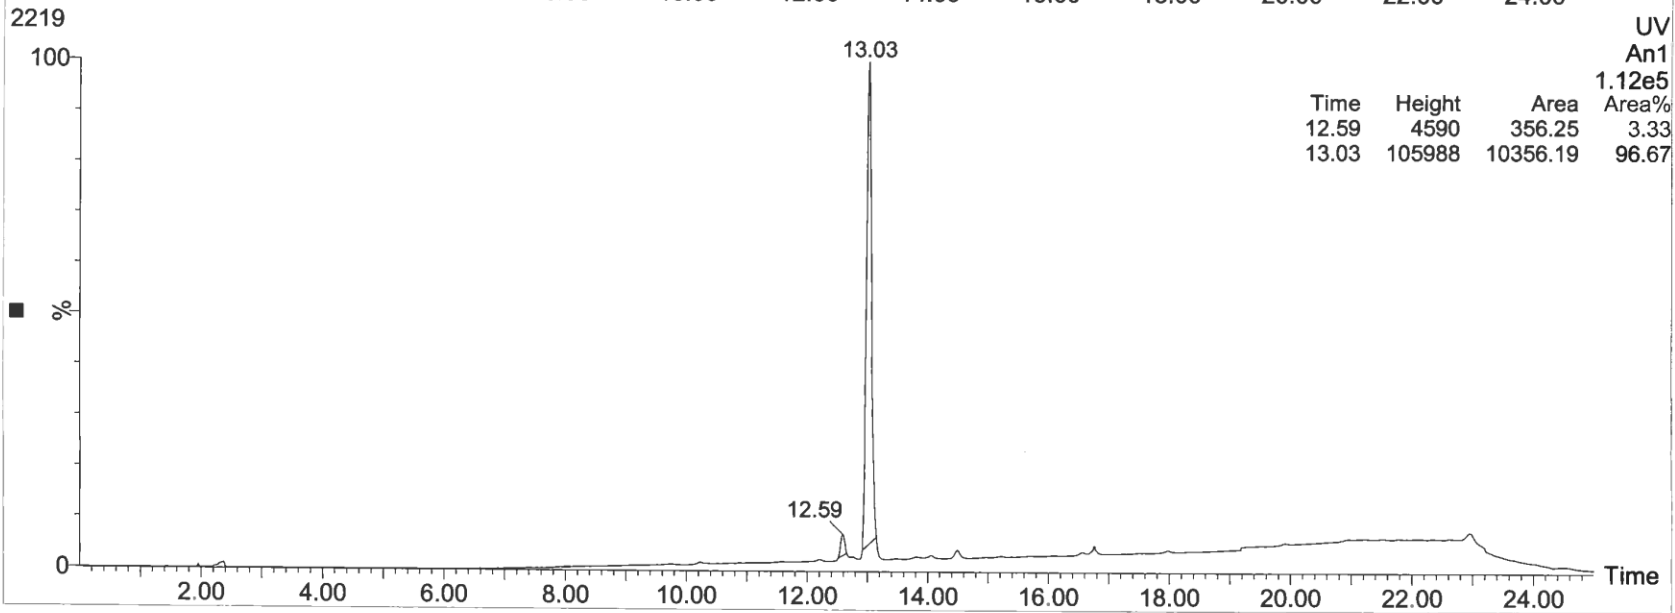

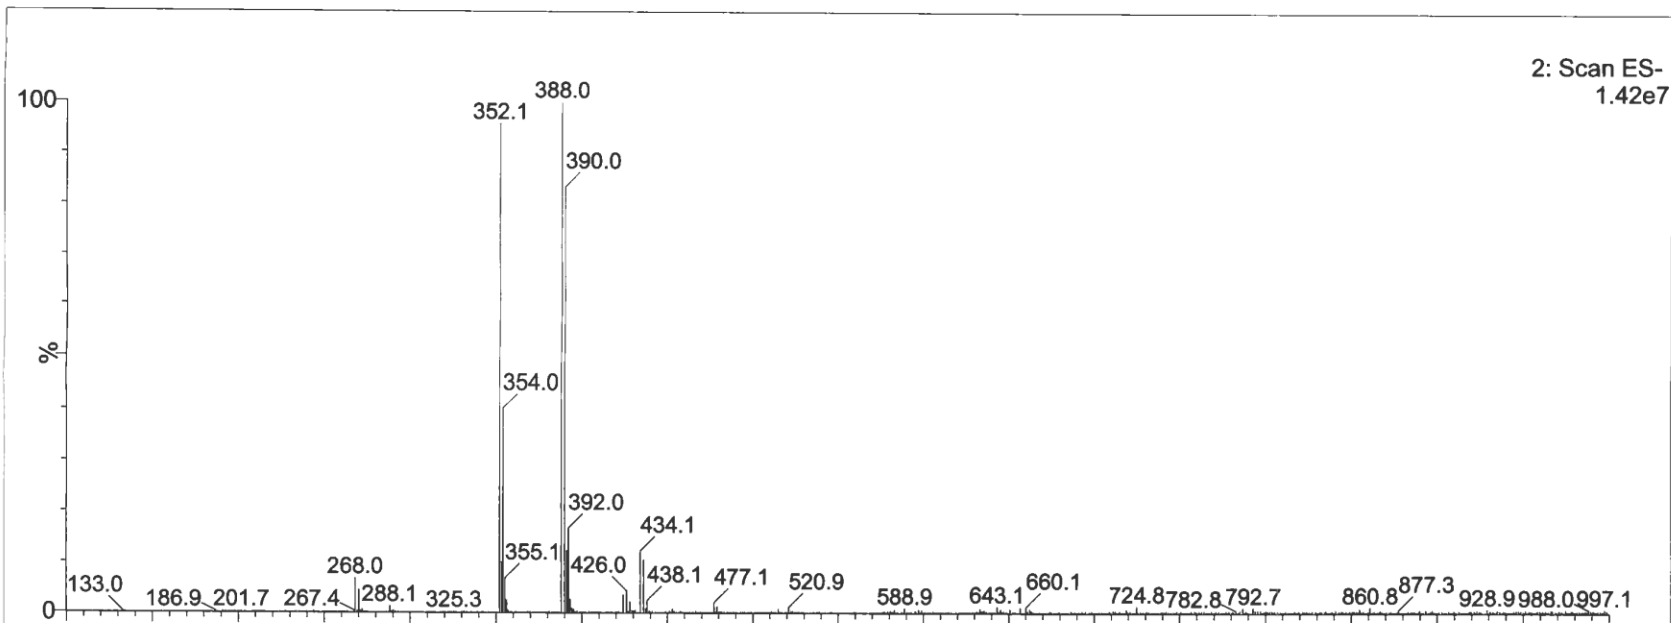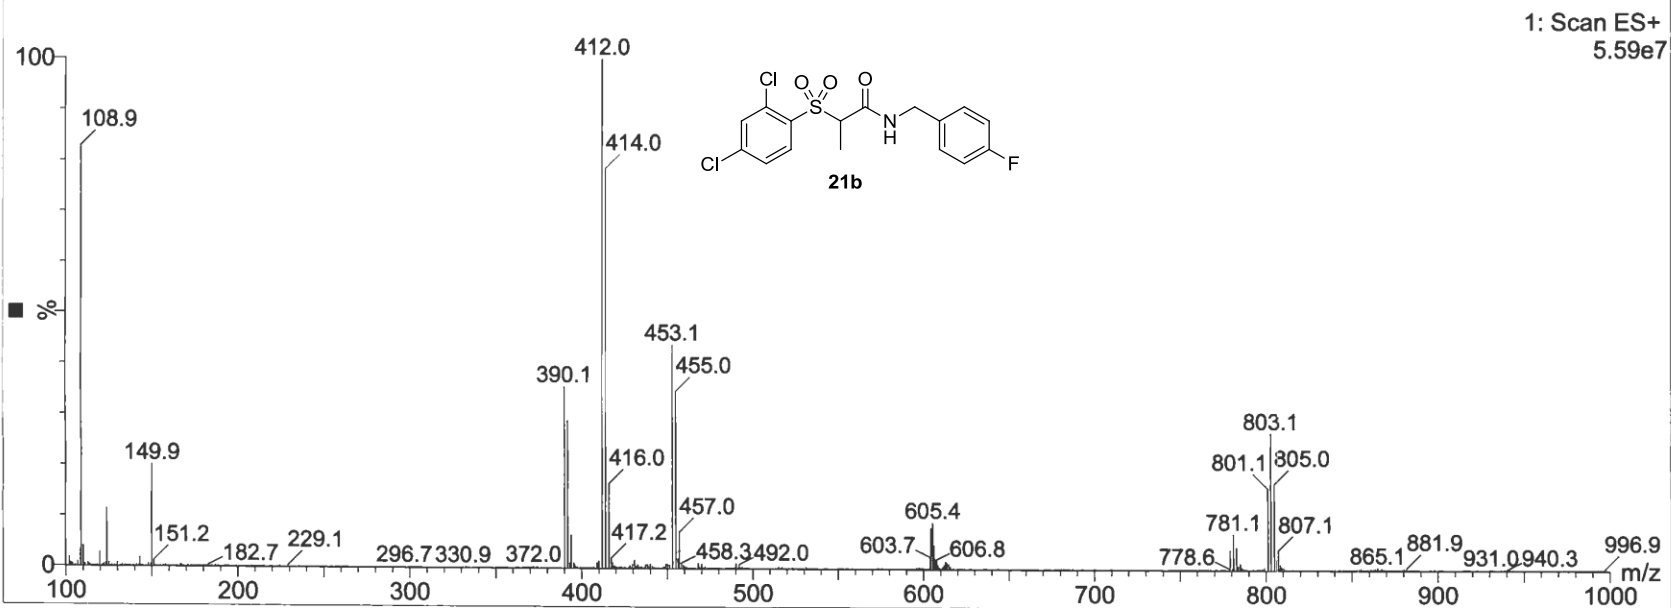

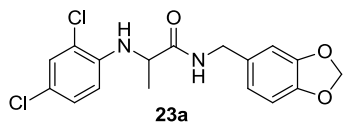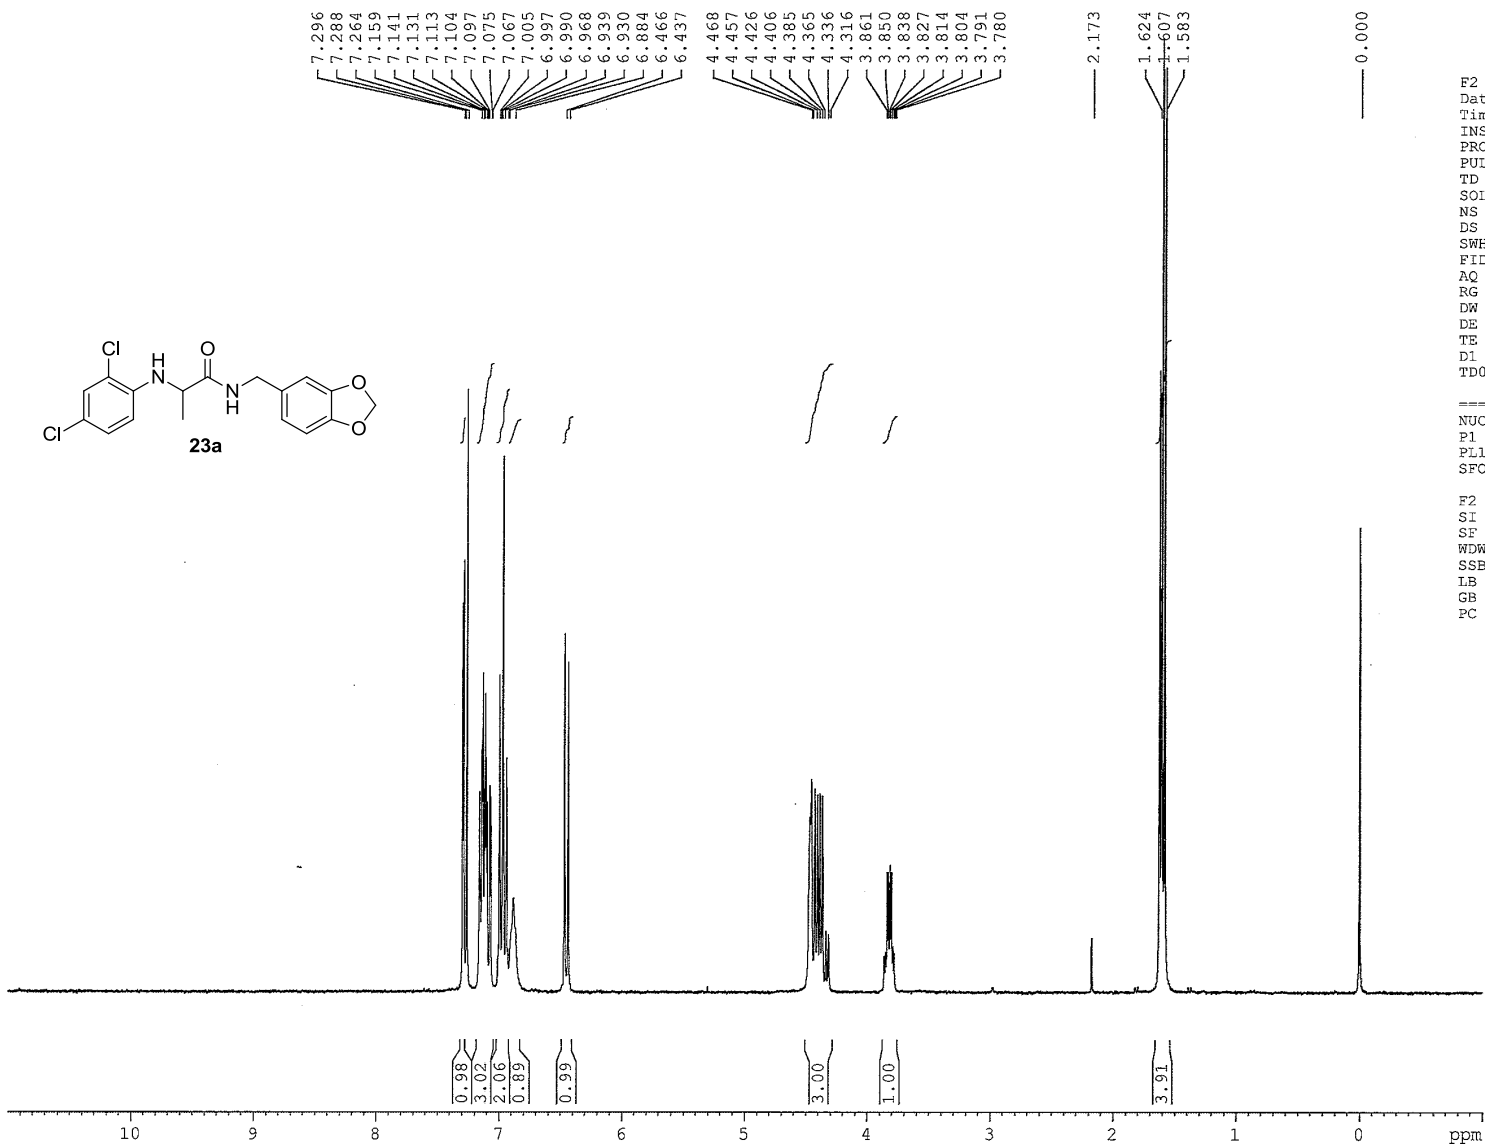

F2 - Acquisition Parameters  
 Date\_ 20101101  
 Time 14.32  
 INSTRUM spect  
 PROBHD 5 mm BBO BB-1H  
 PULPROG zg30  
 TD 65536  
 SOLVENT CDCl3  
 NS 16  
 DS 2  
 SWH 6172.839 Hz  
 FIDRES 0.094190 Hz  
 AQ 5.3084660 sec  
 RG 1290.2  
 DW 81.000 usec  
 DE 6.50 usec  
 TE 292.6 K  
 D1 1.00000000 sec  
 TD0 1

===== CHANNEL f1 =====  
 NUC1 1H  
 P1 10.00 usec  
 PL1 9.20 dB  
 SFO1 299.5718500 MHz

F2 - Processing parameters  
 SI 32768  
 SF 299.5700019 MHz  
 WDW EM  
 SSB 0  
 LB 0.30 Hz  
 GB 0  
 PC 1.00

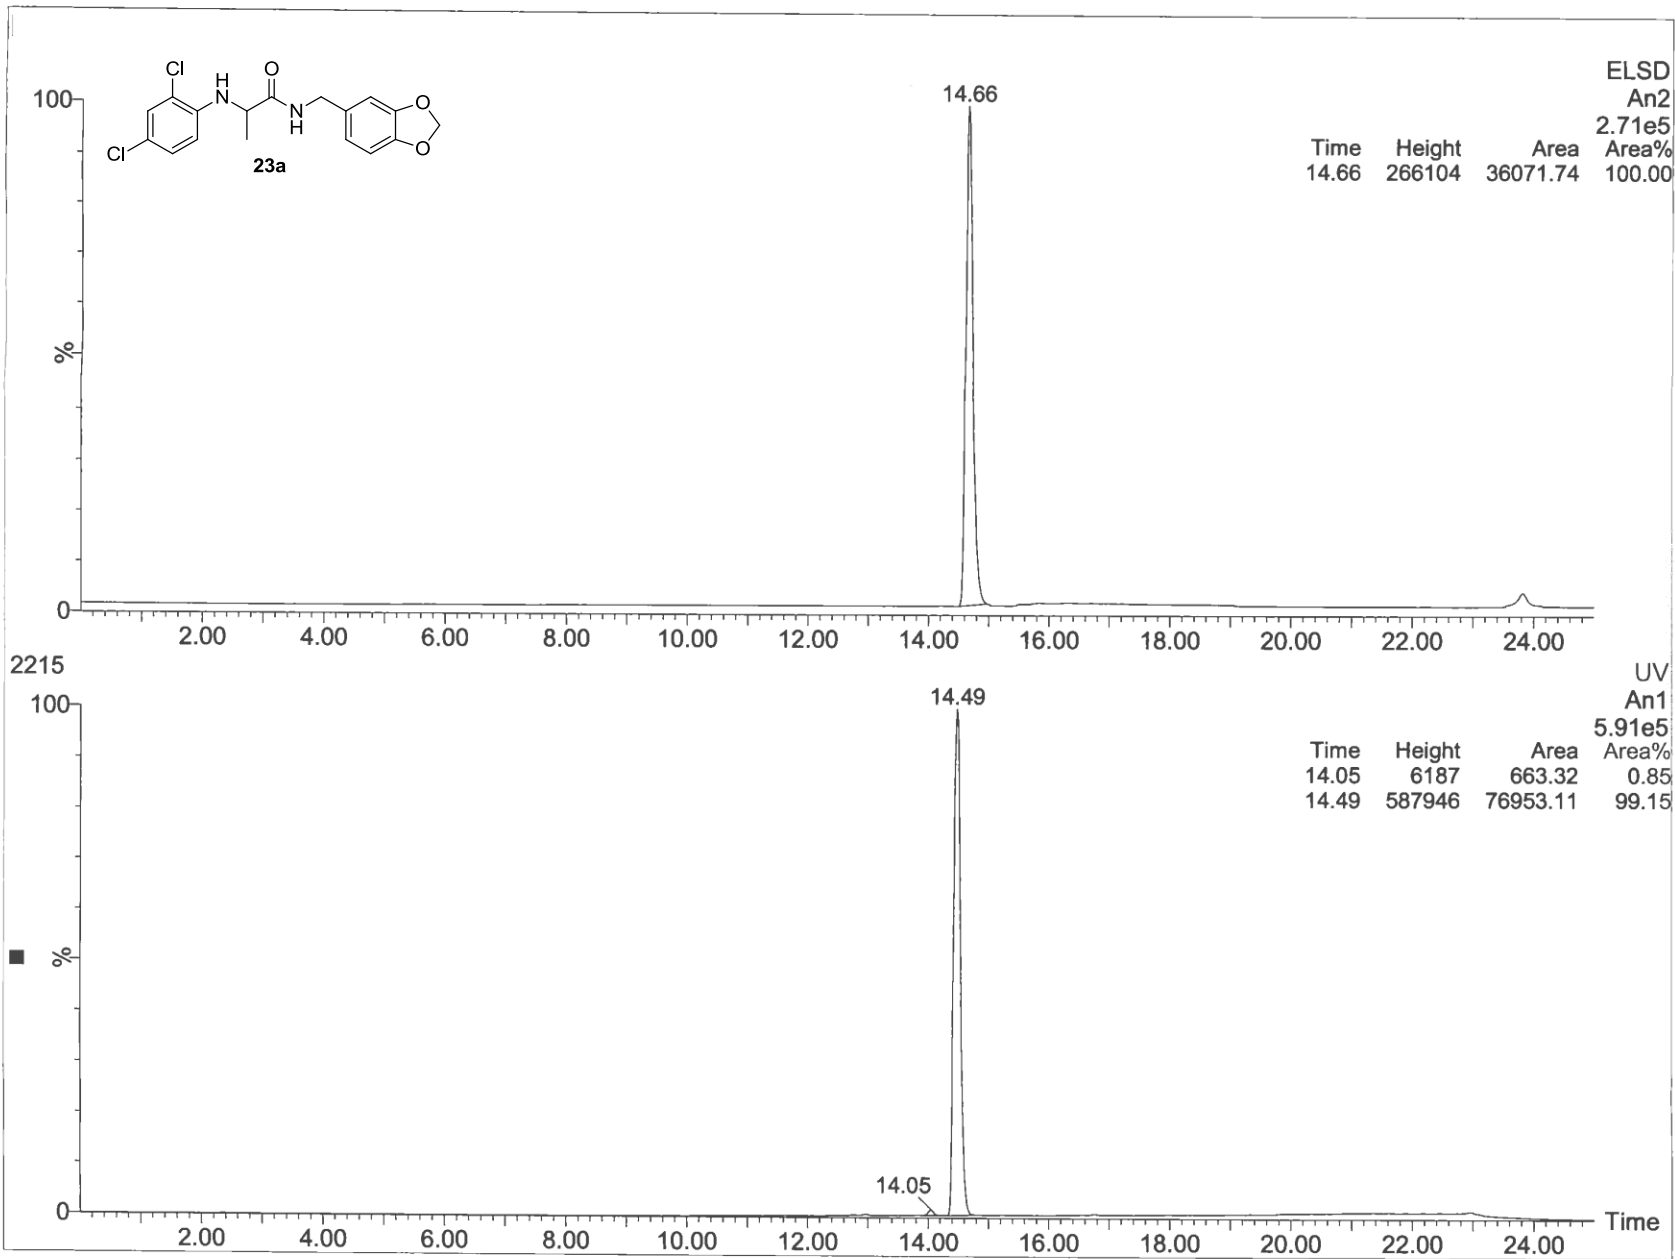



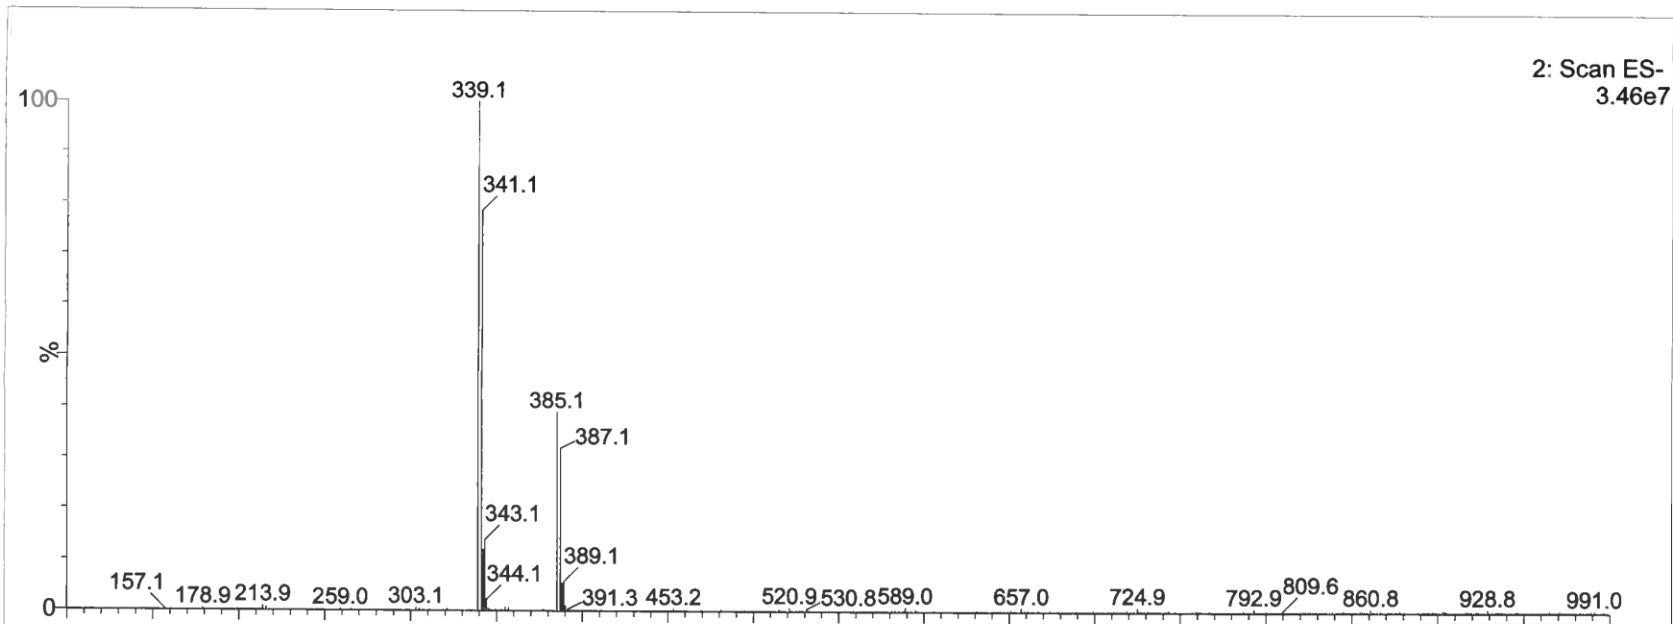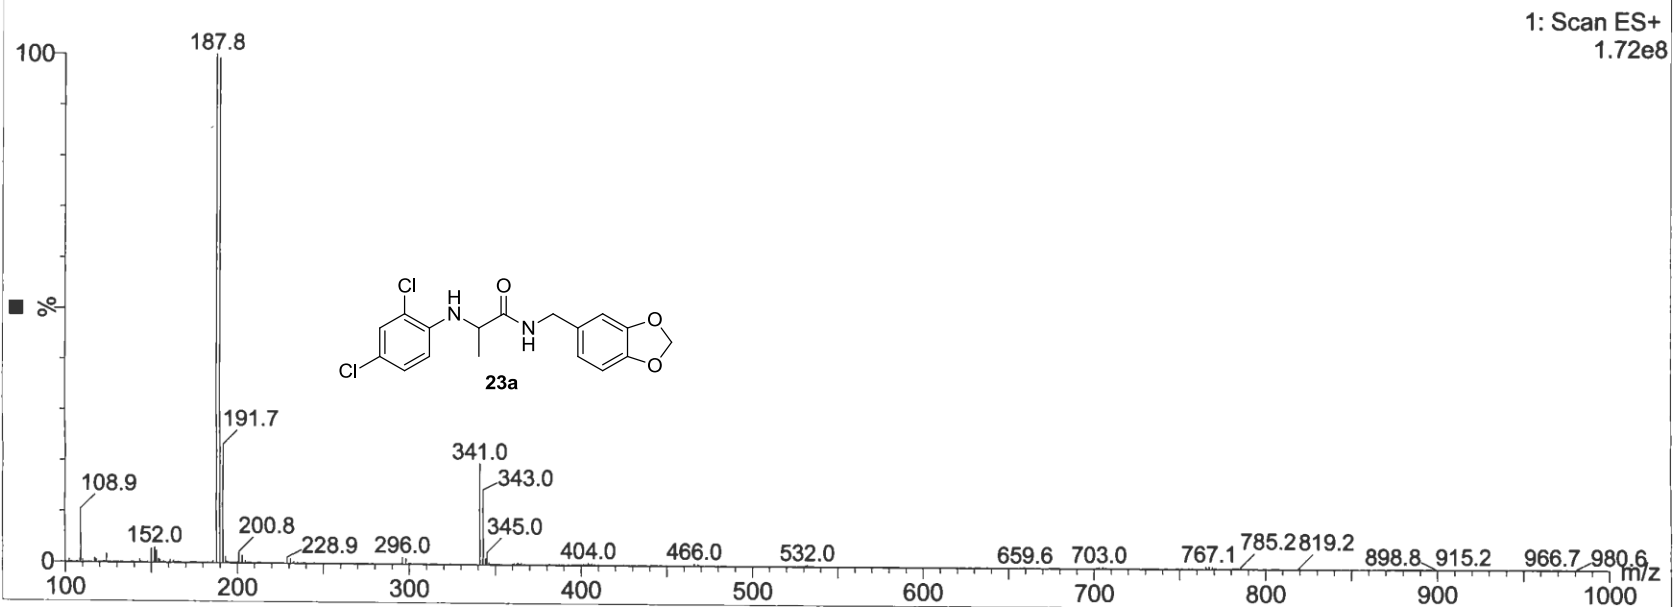

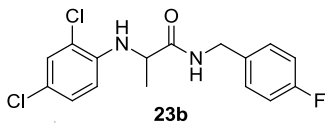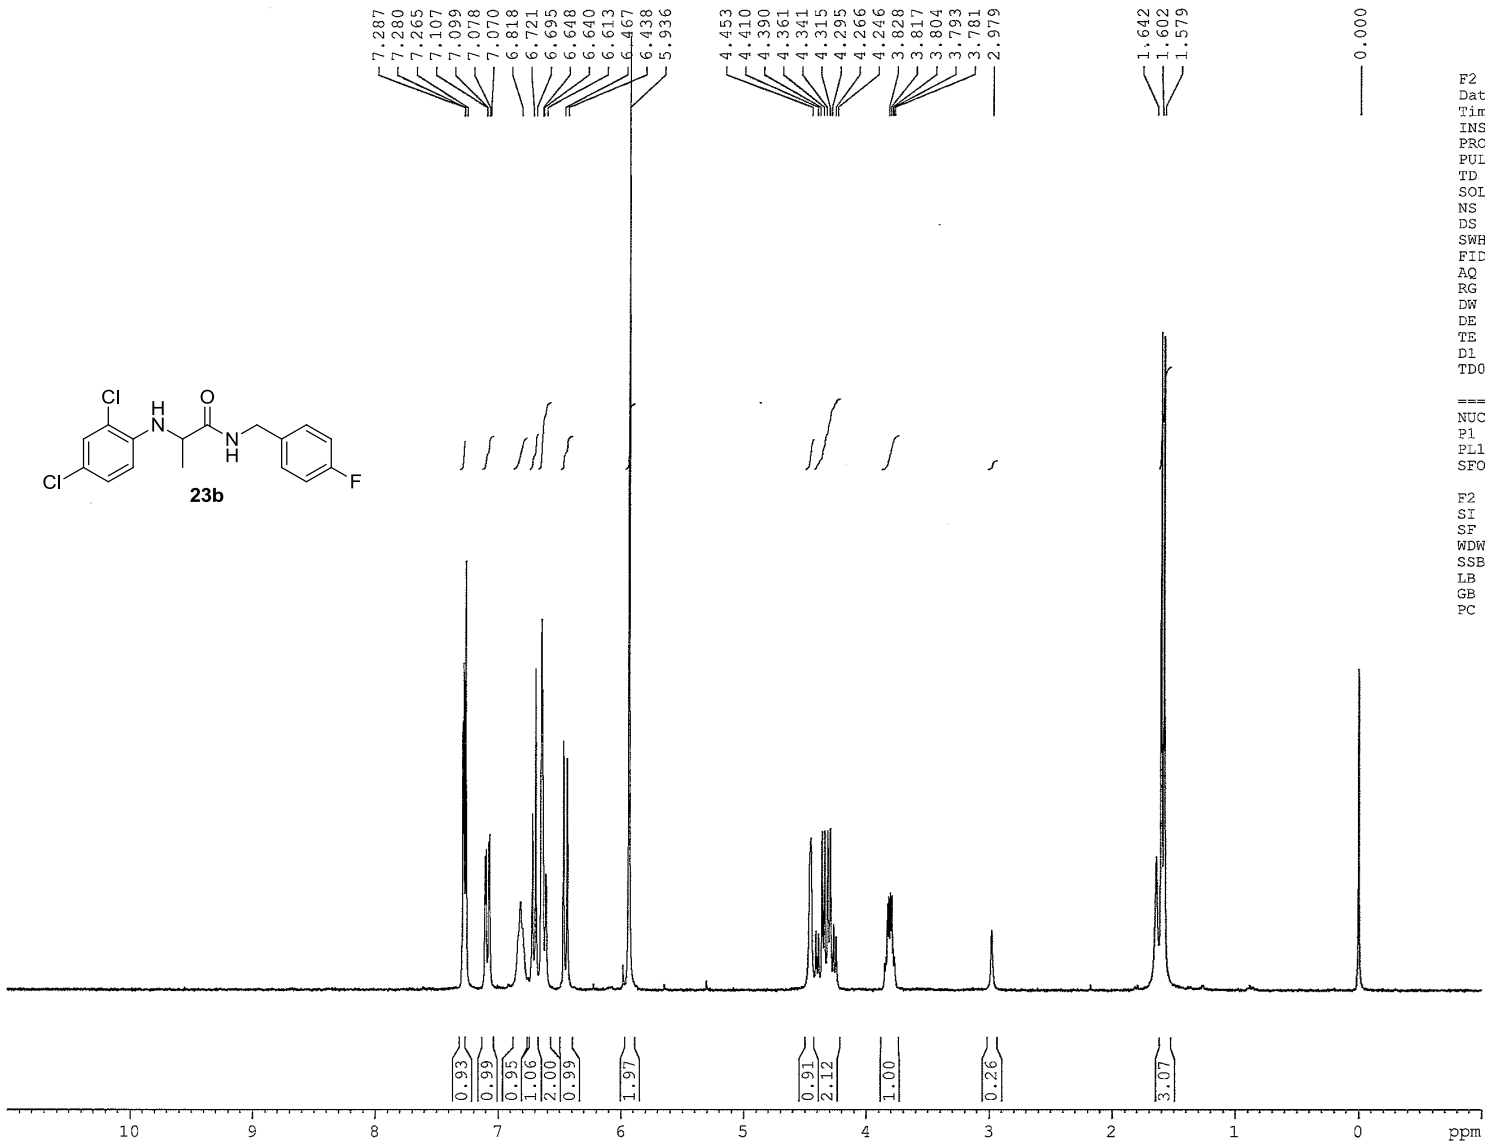

7.287  
 7.280  
 7.265  
 7.107  
 7.099  
 7.078  
 7.070  
 6.818  
 6.721  
 6.695  
 6.648  
 6.640  
 6.613  
 6.467  
 6.438  
 5.936

4.453  
 4.410  
 4.390  
 4.361  
 4.341  
 4.315  
 4.295  
 4.266  
 4.246  
 3.828  
 3.817  
 3.804  
 3.793  
 3.781  
 2.979

1.642  
 1.602  
 1.579

0.000

0.93  
 0.99  
 0.95  
 1.06  
 2.00  
 0.99  
 1.97

0.91  
 2.12  
 1.00  
 0.26

3.07

F2 - Acquisition Parameters  
 Date\_ 20101101  
 Time\_ 14.02  
 INSTRUM spect  
 PROBHD 5 mm BBO BB-1H  
 PULPROG zg30  
 TD 65536  
 SOLVENT CDCl3  
 NS 16  
 DS 2  
 SWH 6172.839 Hz  
 FIDRES 0.094190 Hz  
 AQ 5.3084660 sec  
 RG 1290.2  
 DW 81.000 usec  
 DE 6.50 usec  
 TE 291.8 K  
 DL 1.00000000 sec  
 TD0 1

===== CHANNEL f1 =====  
 NUC1 1H  
 P1 10.00 usec  
 PL1 9.20 dB  
 SFO1 299.5718500 MHz

F2 - Processing parameters  
 SI 32768  
 SF 299.5700017 MHz  
 WDW EM  
 SSB 0  
 LB 0.30 Hz  
 GB 0  
 PC 1.00

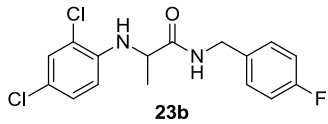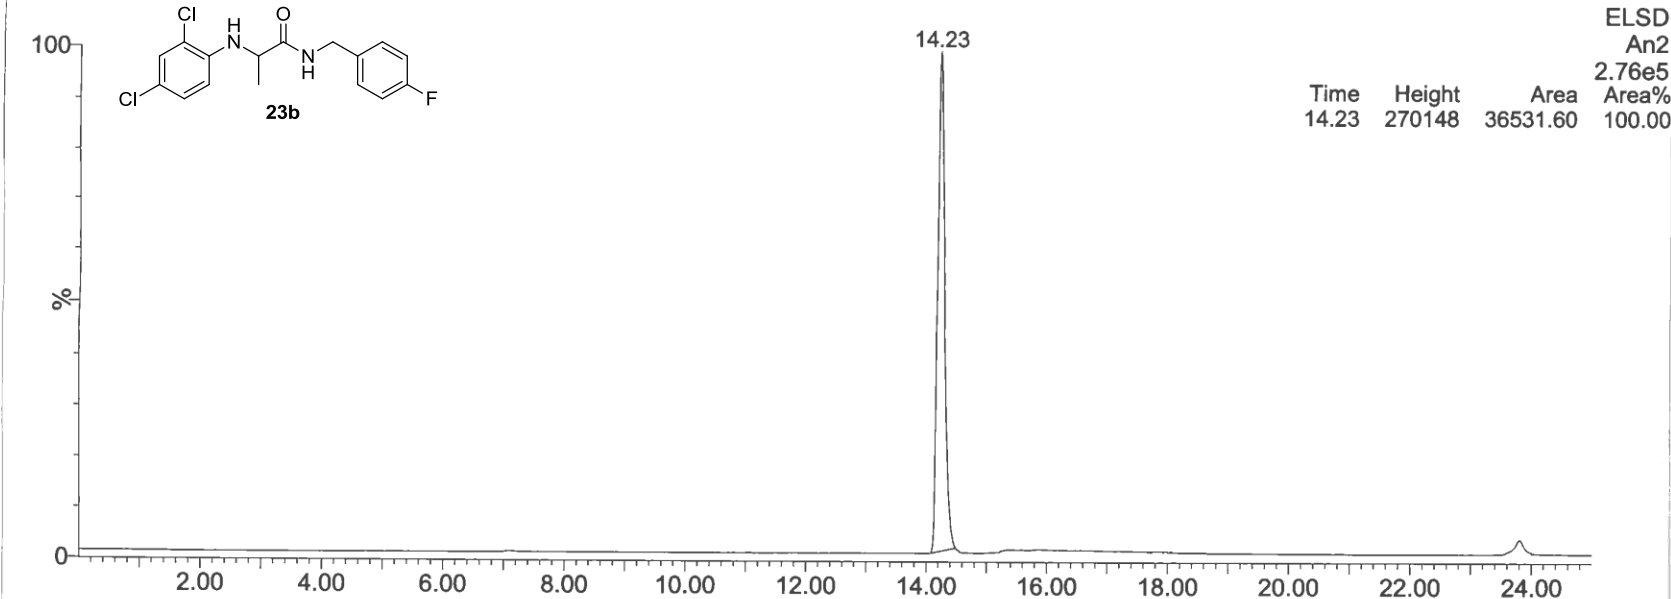

ELSD  
An2  
2.76e5

| Time  | Height | Area     | Area%  |
|-------|--------|----------|--------|
| 14.23 | 270148 | 36531.60 | 100.00 |

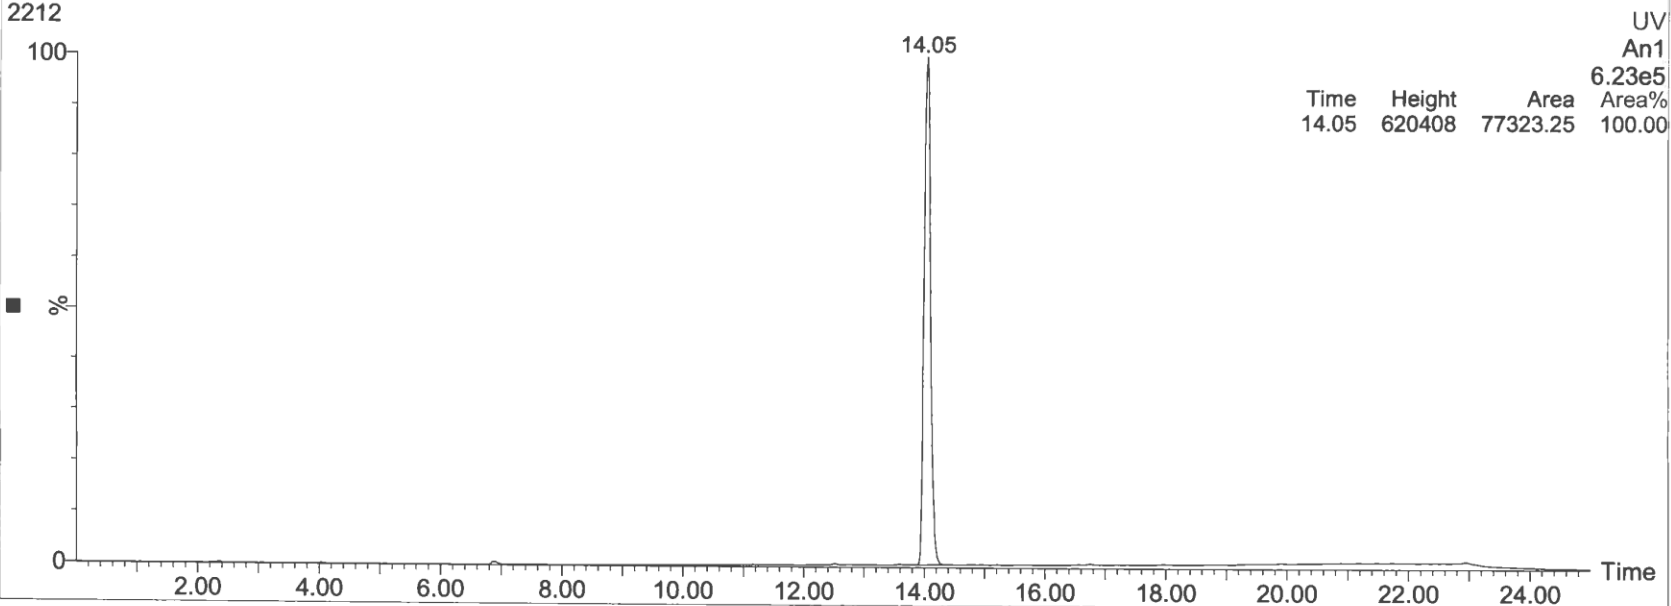

UV  
An1  
6.23e5

| Time  | Height | Area     | Area%  |
|-------|--------|----------|--------|
| 14.05 | 620408 | 77323.25 | 100.00 |

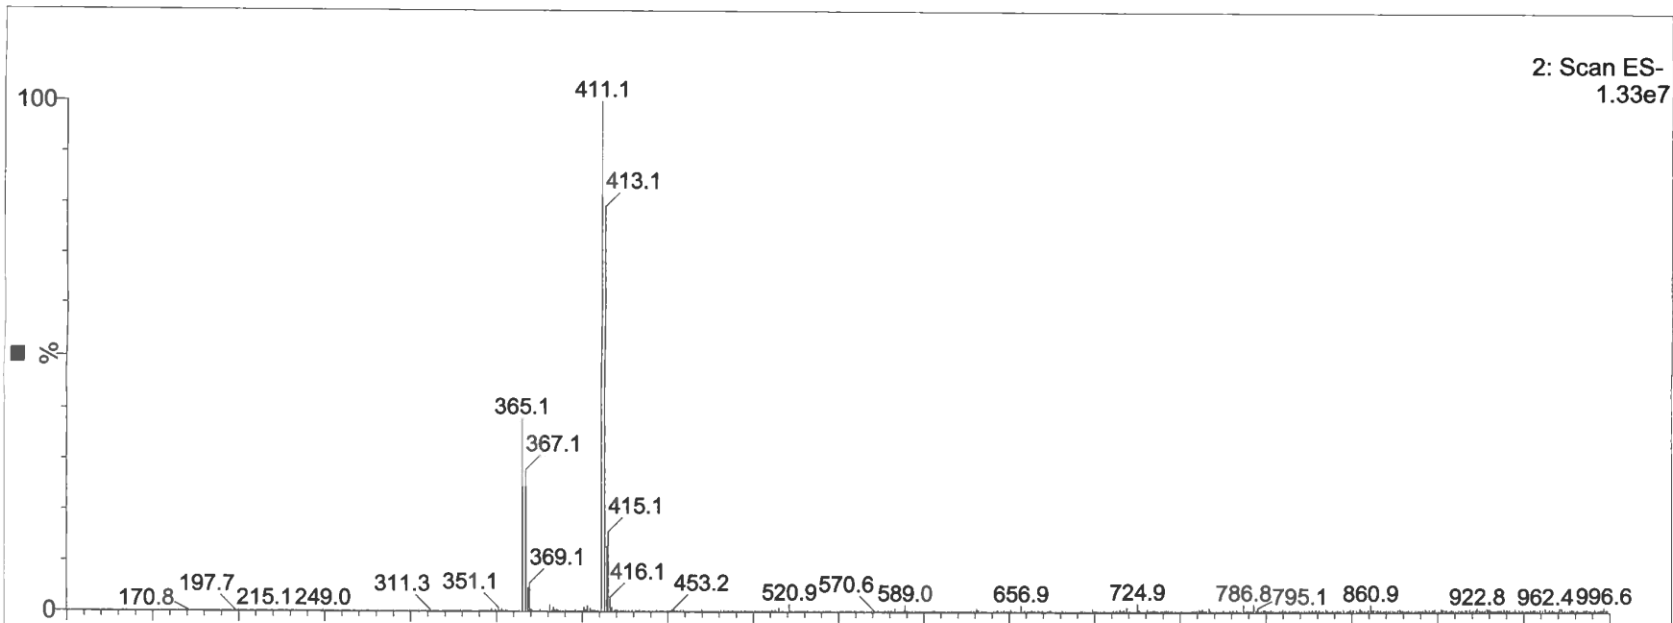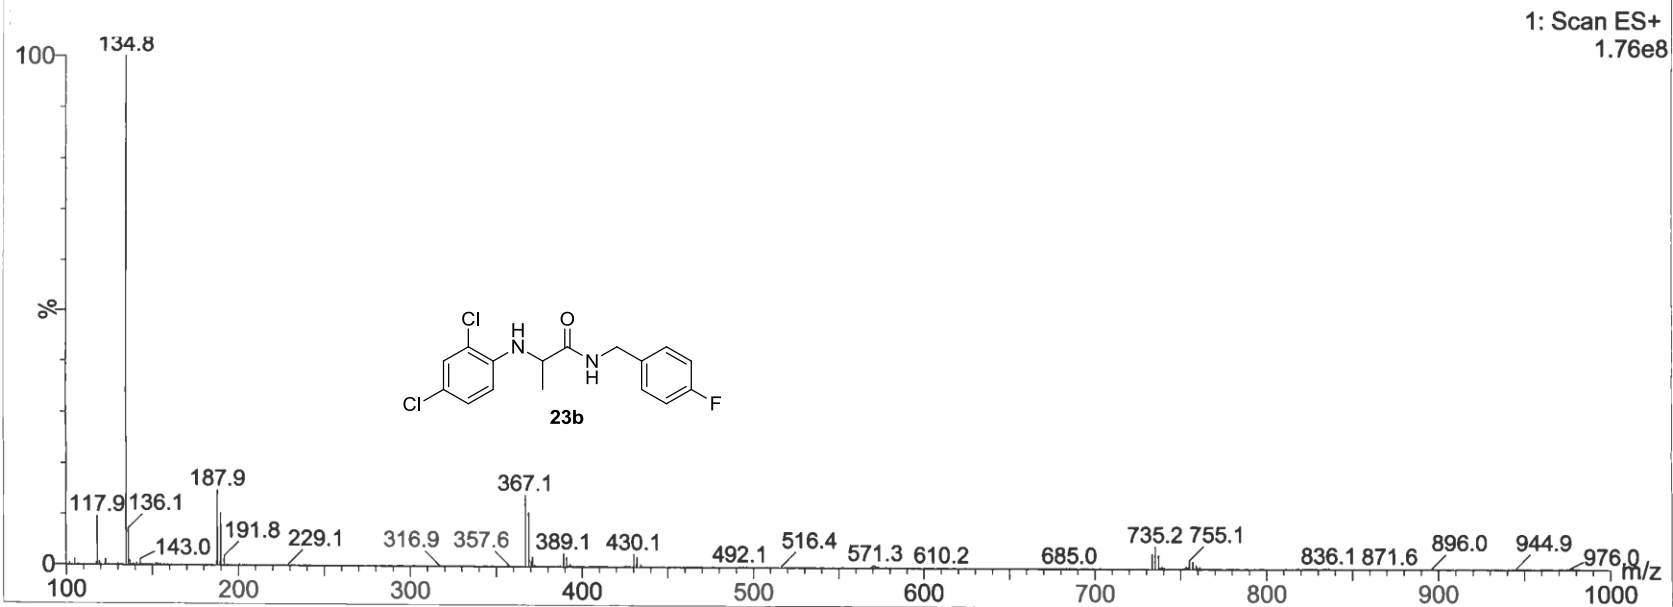

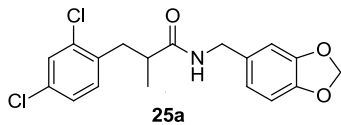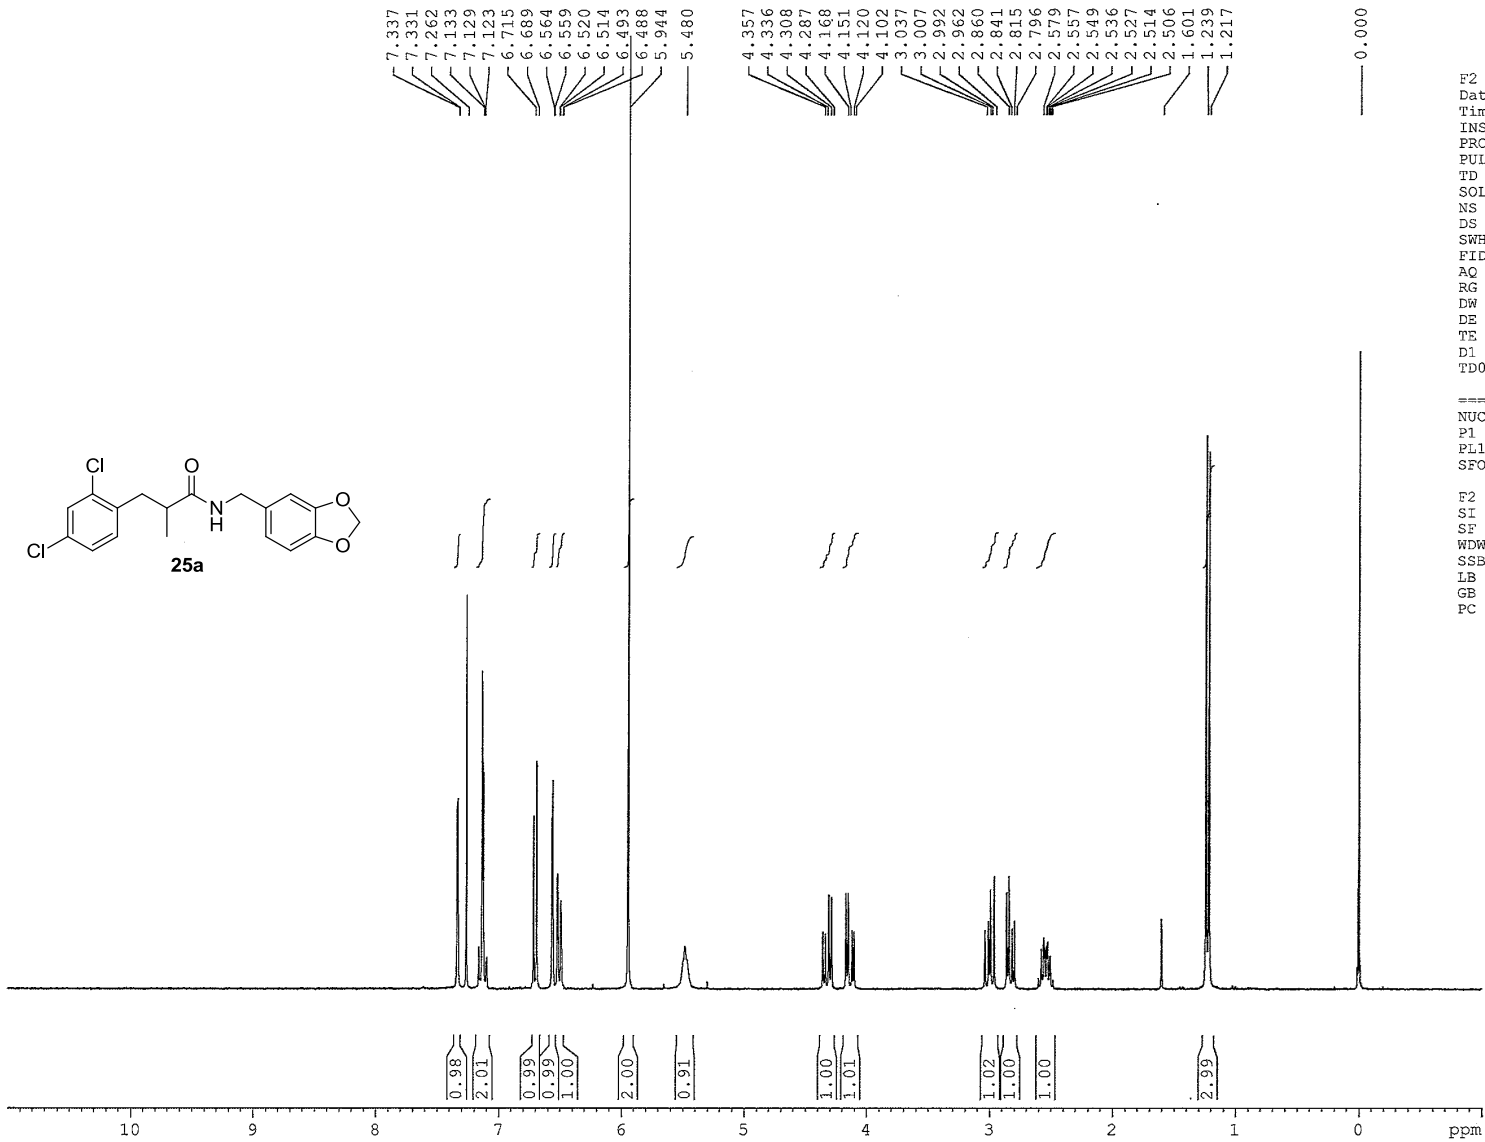

F2 - Acquisition Parameters  
 Date\_ 20101216  
 Time\_ 14.26  
 INSTRUM spect  
 PROBHD 5 mm BBO BB-1H  
 PULPROG zg30  
 TD 65536  
 SOLVENT CDCl3  
 NS 16  
 DS 2  
 SWH 6172.839 Hz  
 FIDRES 0.094190 Hz  
 AQ 5.3084660 sec  
 RG 1625.5  
 DW 81.000 usec  
 DE 6.50 usec  
 TE 296.0 K  
 D1 1.00000000 sec  
 TD0 1

==== CHANNEL f1 =====  
 NUC1 1H  
 P1 10.00 usec  
 PL1 9.20 dB  
 SF01 299.5718500 MHz

F2 - Processing parameters  
 SI 32768  
 SF 299.5700026 MHz  
 WDW EM  
 SSB 0  
 LB 0.30 Hz  
 GB 0  
 PC 1.00

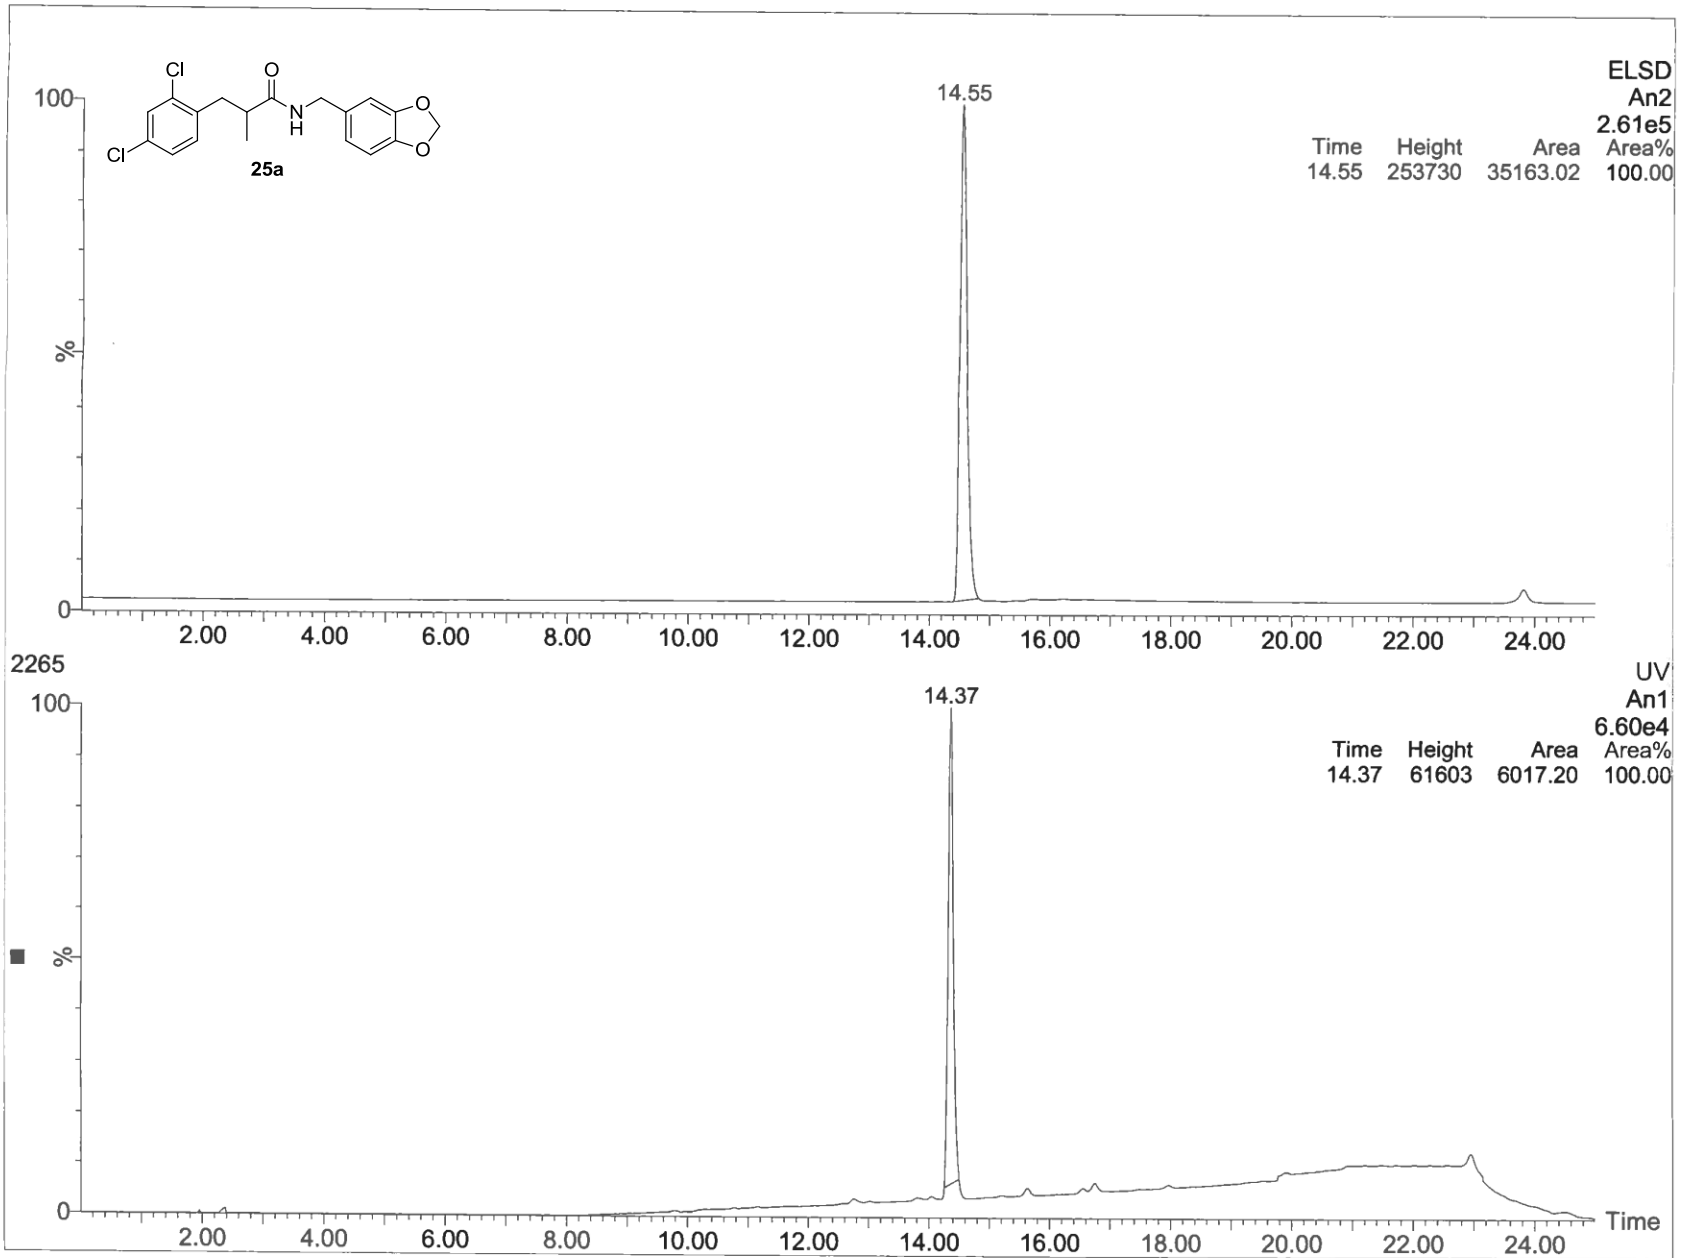

1: Scan ES+  
1.00e8

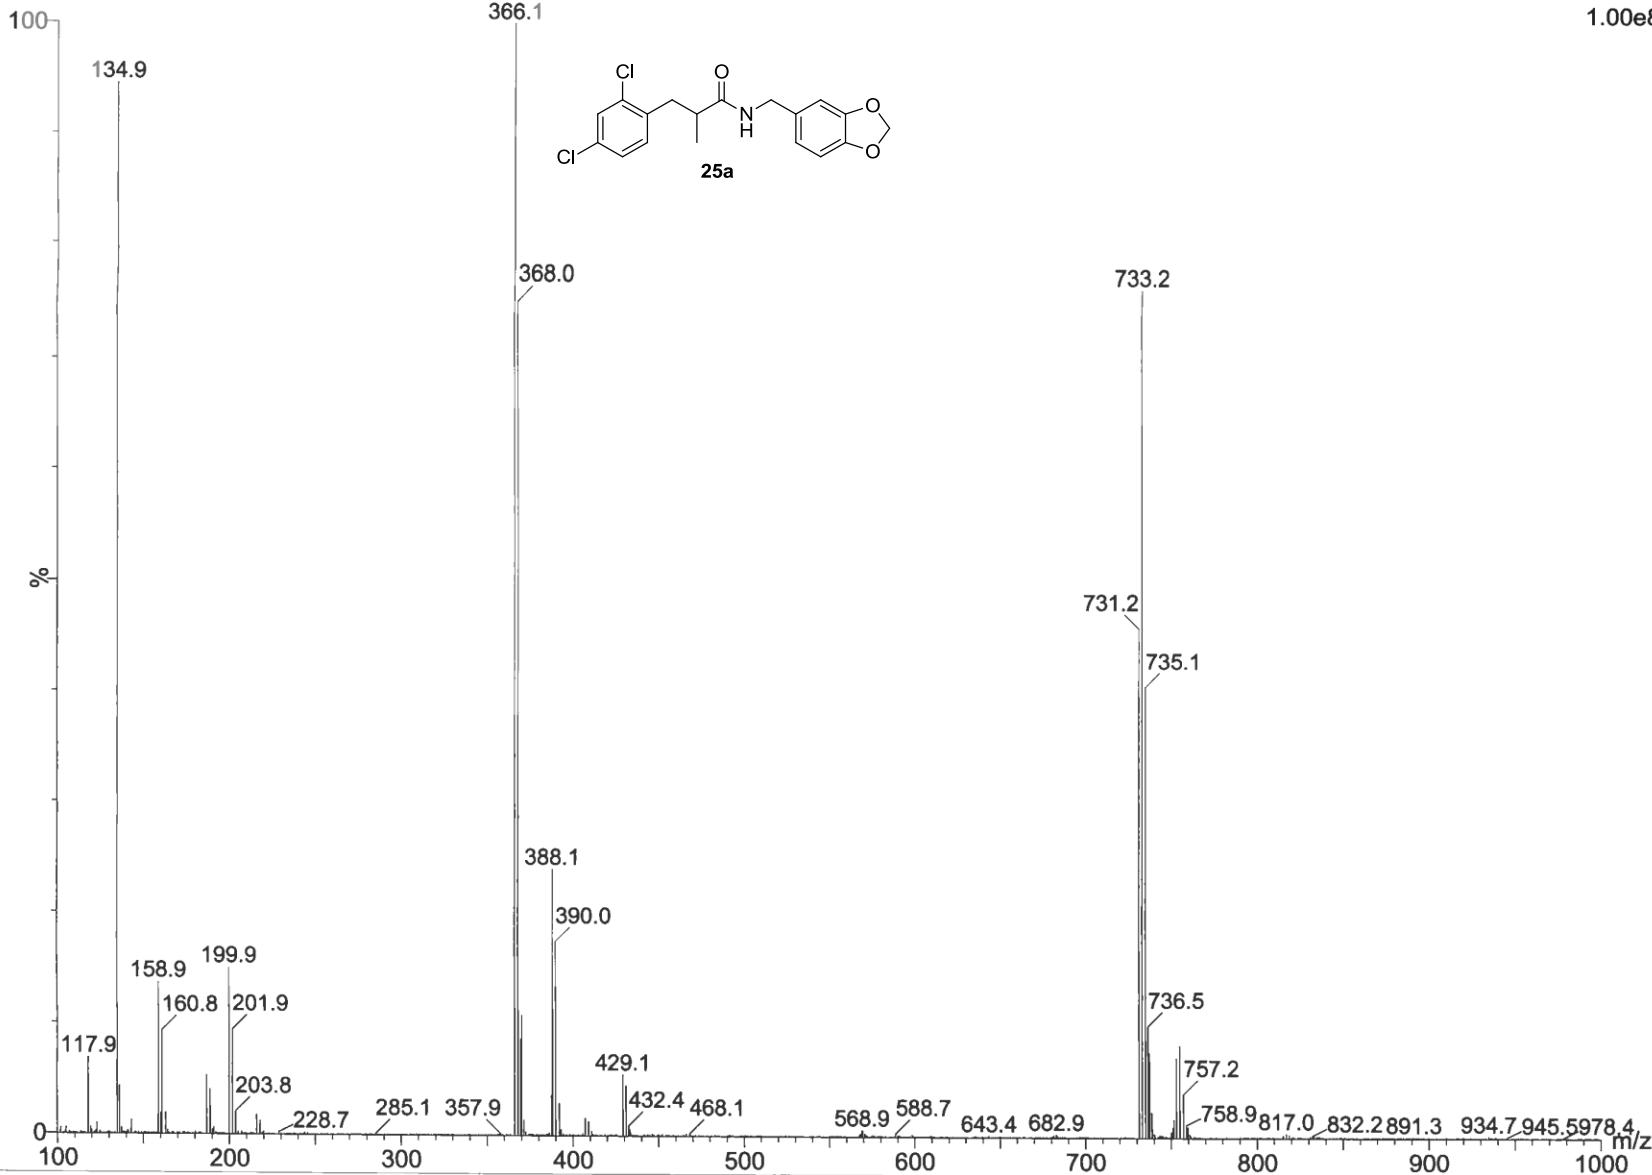

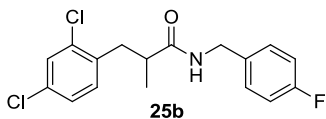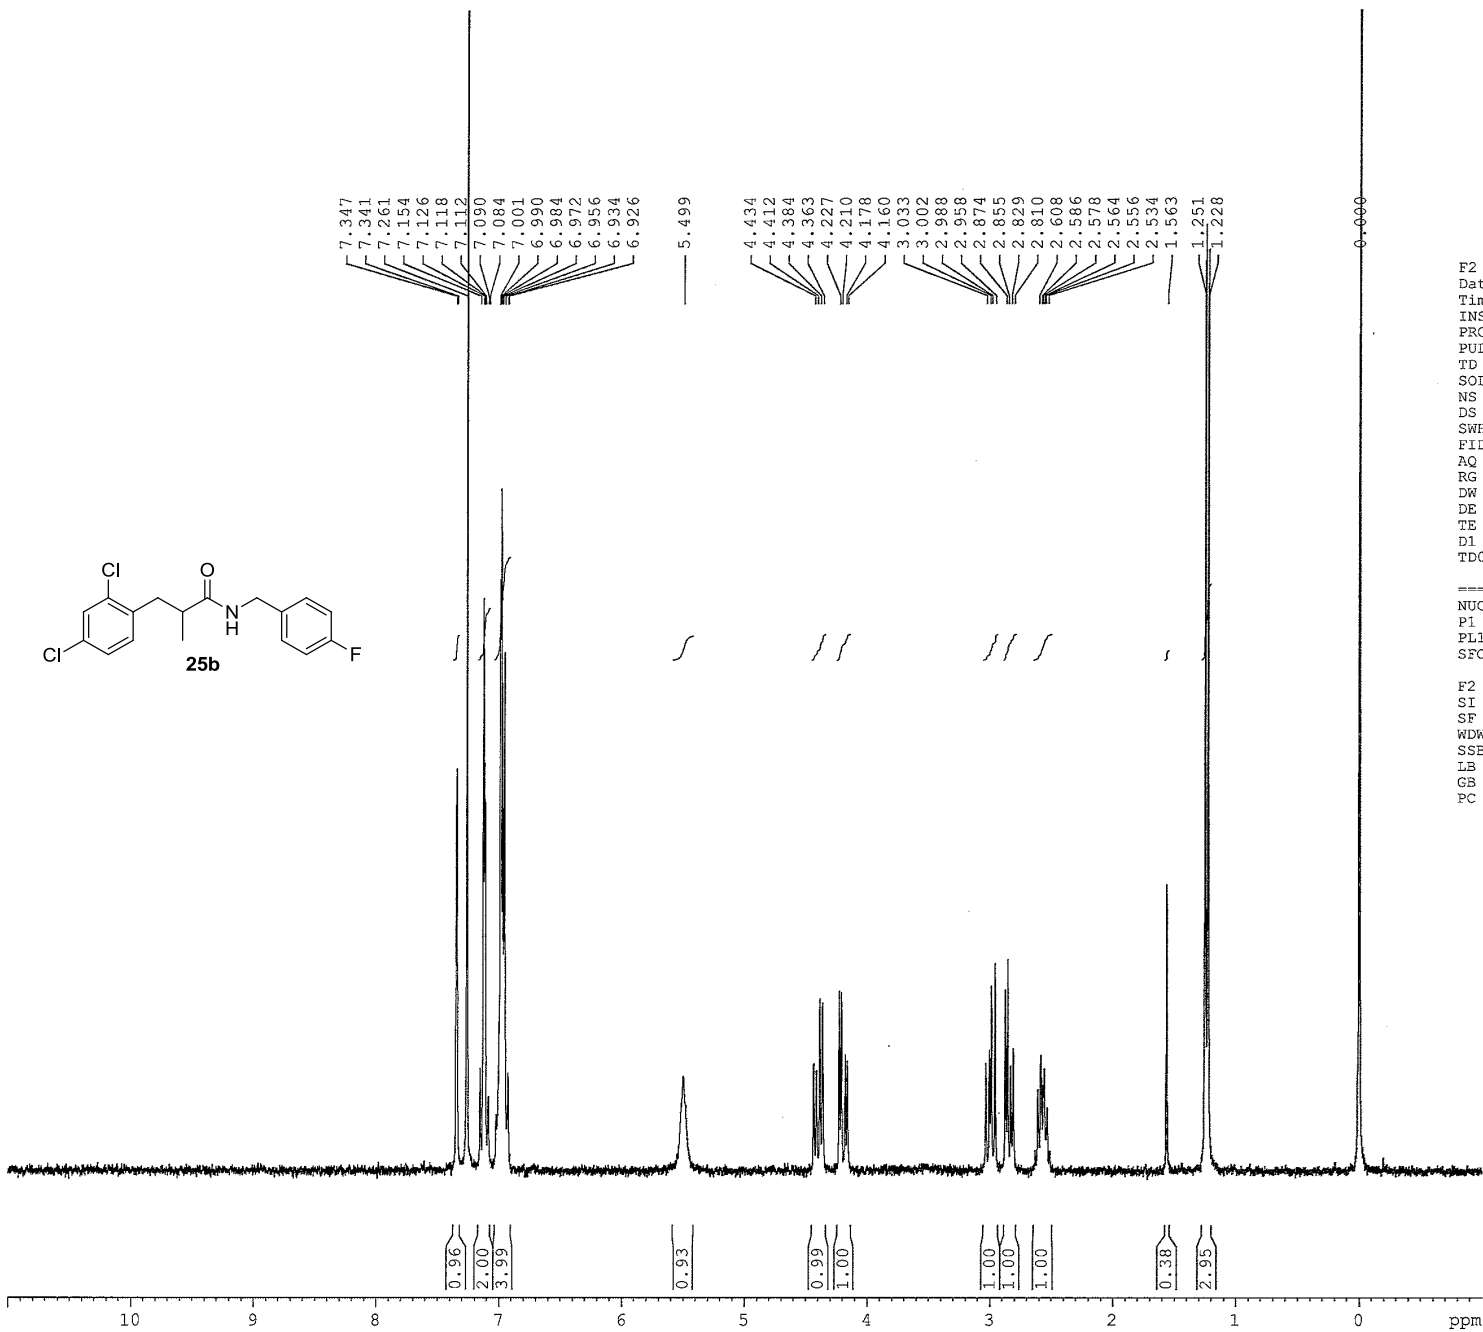

F2 - Acquisition Parameters  
 Date\_ 20101216  
 Time\_ 14.35  
 INSTRUM spect  
 PROBHD 5 mm BBO BB-1H  
 PULPROG zg30  
 TD 65536  
 SOLVENT CDCl3  
 NS 16  
 DS 2  
 SWH 6172.839 Hz  
 FIDRES 0.094190 Hz  
 AQ 5.3084660 sec  
 RG 2896.3  
 DW 81.000 usec  
 DE 6.50 usec  
 TE 296.1 K  
 D1 1.00000000 sec  
 TD0 1

===== CHANNEL f1 =====  
 NUC1 1H  
 P1 10.00 usec  
 PL1 9.20 dB  
 SFO1 299.5718500 MHz

F2 - Processing parameters  
 SI 32768  
 SF 299.5700027 MHz  
 WDW EM  
 SSB 0  
 LB 0.30 Hz  
 GB 0  
 PC 1.00



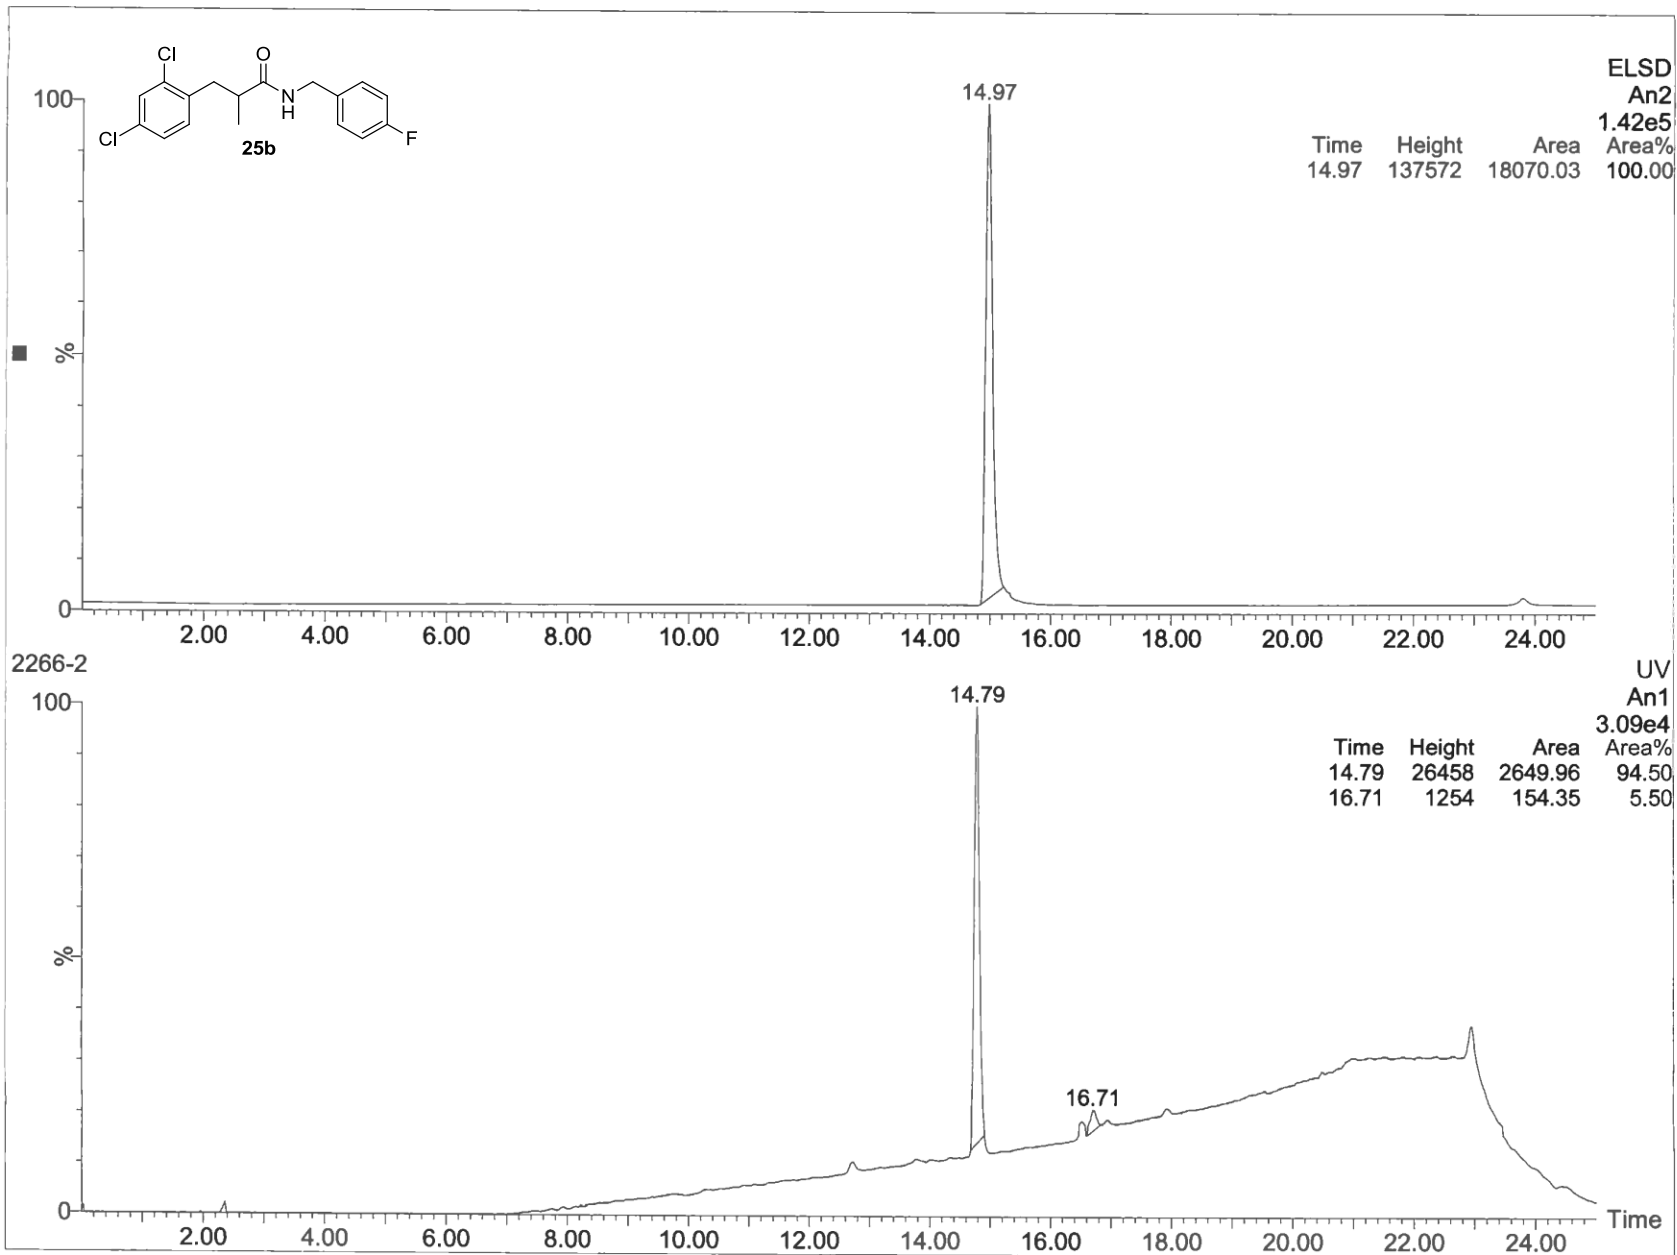

1: Scan ES+  
1.38e8

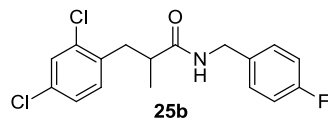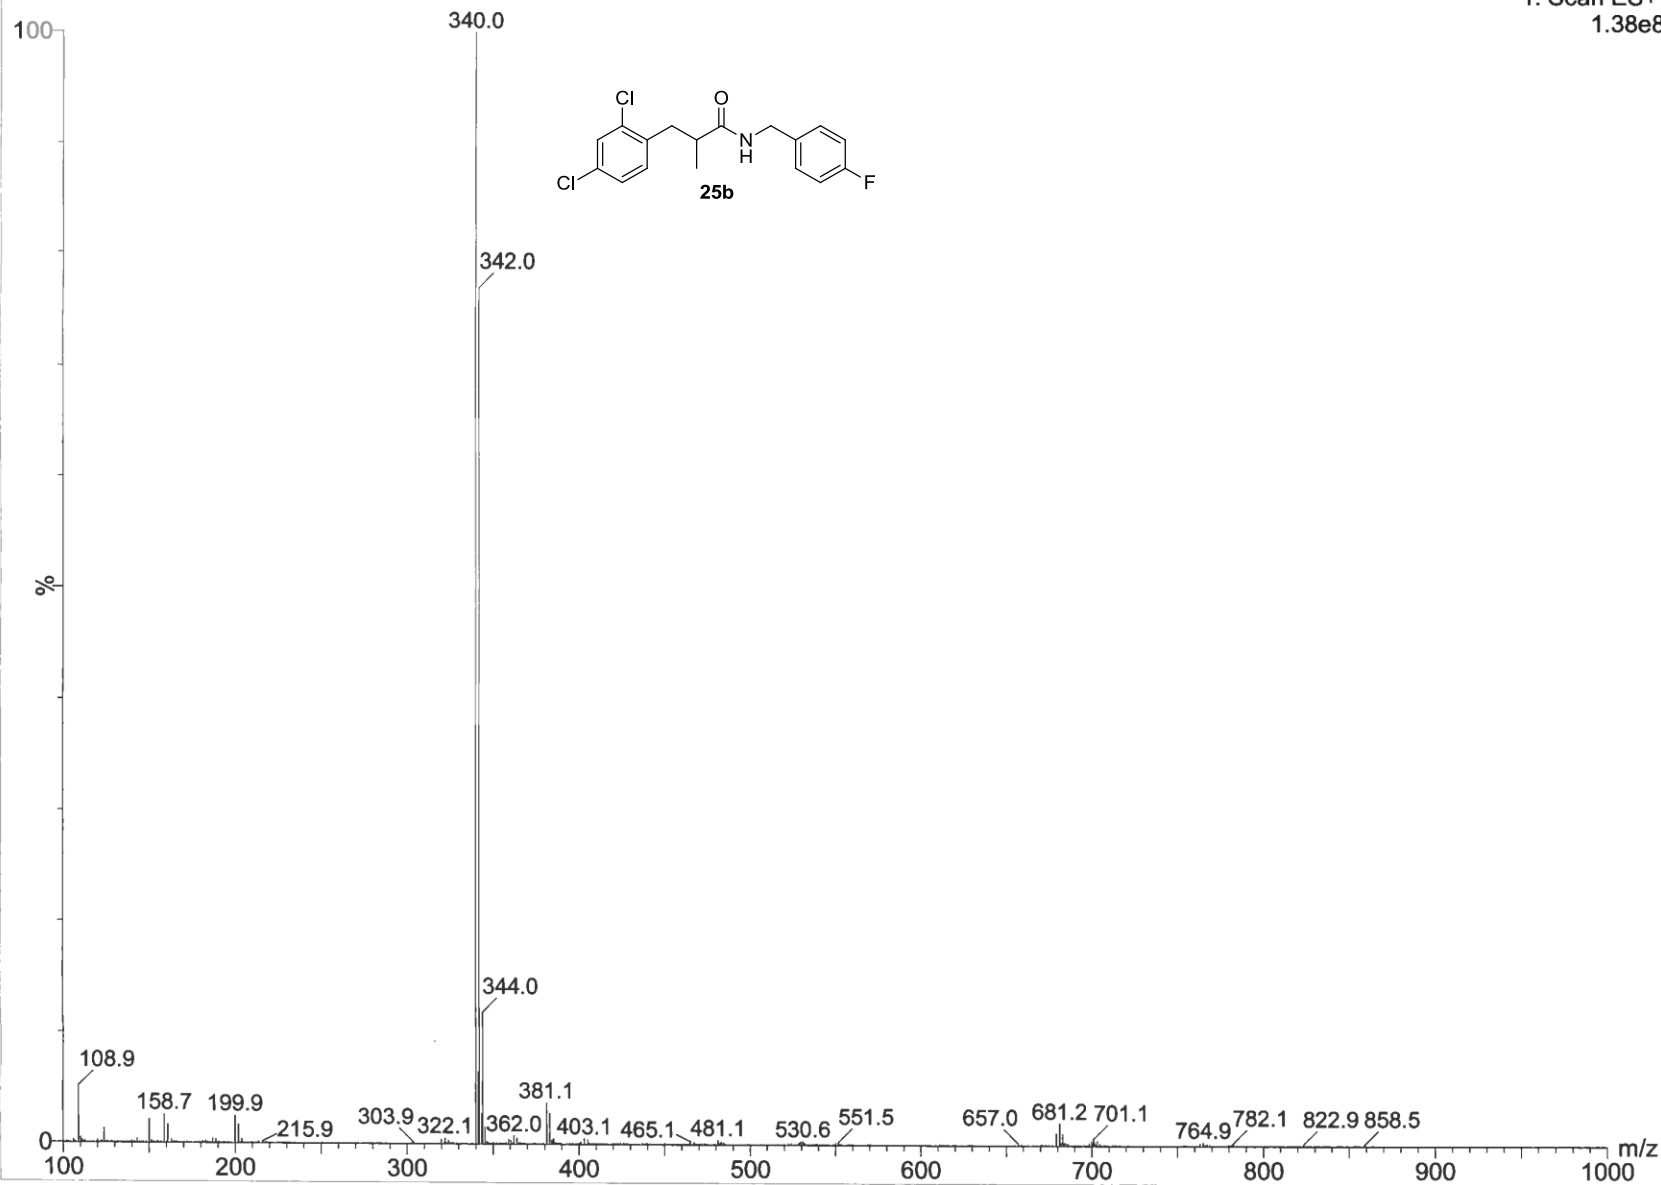

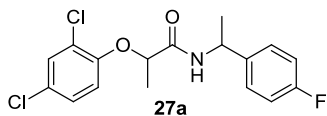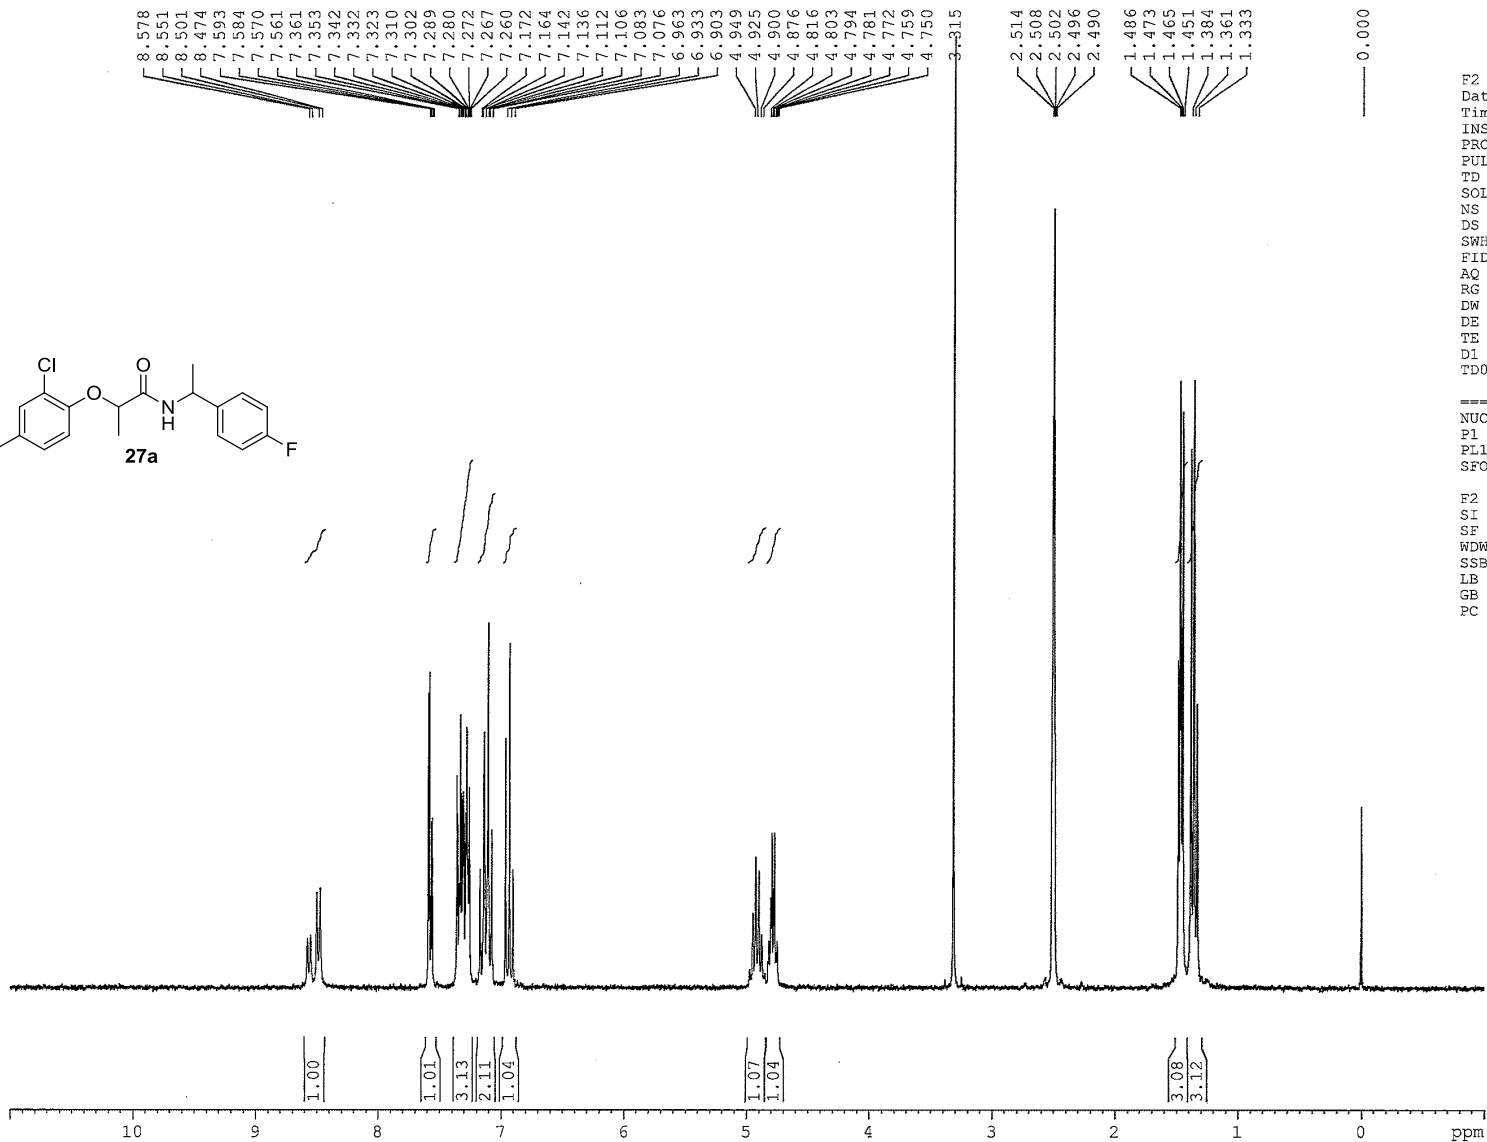

F2 - Acquisition Parameters  
 Date 20140402  
 Time 13.20  
 INSTRUM spect  
 PROBHD 5 mm BBO BB-1H  
 FULPROG zg30  
 TD 65536  
 SOLVENT DMSO  
 NS 16  
 DS 2  
 SWH 6172.839 Hz  
 FIDRES 0.094190 Hz  
 AQ 5.3084660 sec  
 RG 2298.8  
 DW 81.000 usec  
 DE 6.50 usec  
 TE 298.2 K  
 DI 1.00000000 sec  
 TD0 1

===== CHANNEL f1 =====  
 NUC1 1H  
 P1 10.00 usec  
 PL1 3.00 dB  
 SFO1 299.3952489 MHz

F2 - Processing parameters  
 SI 32768  
 SF 299.3933990 MHz  
 WDW EM  
 SSB 0  
 LB 0.30 Hz  
 GE 0  
 PC 1.00

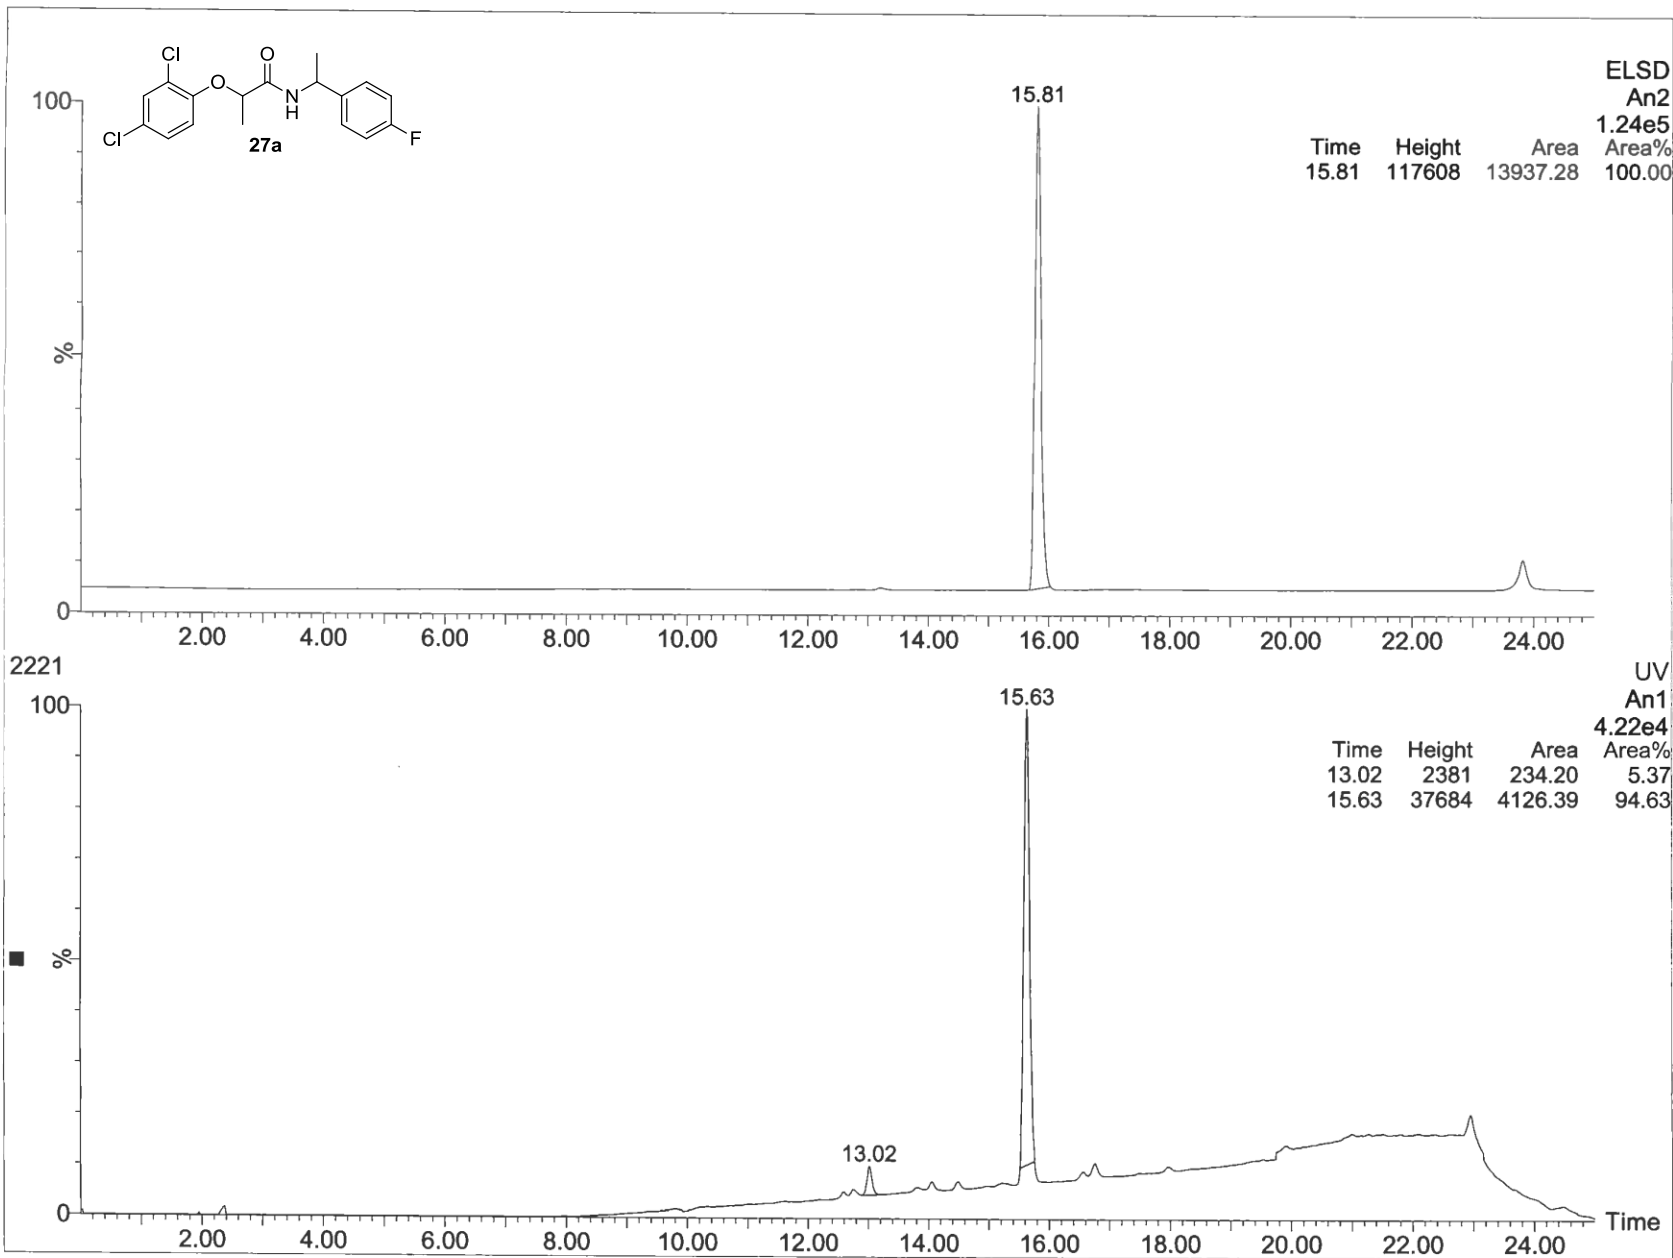

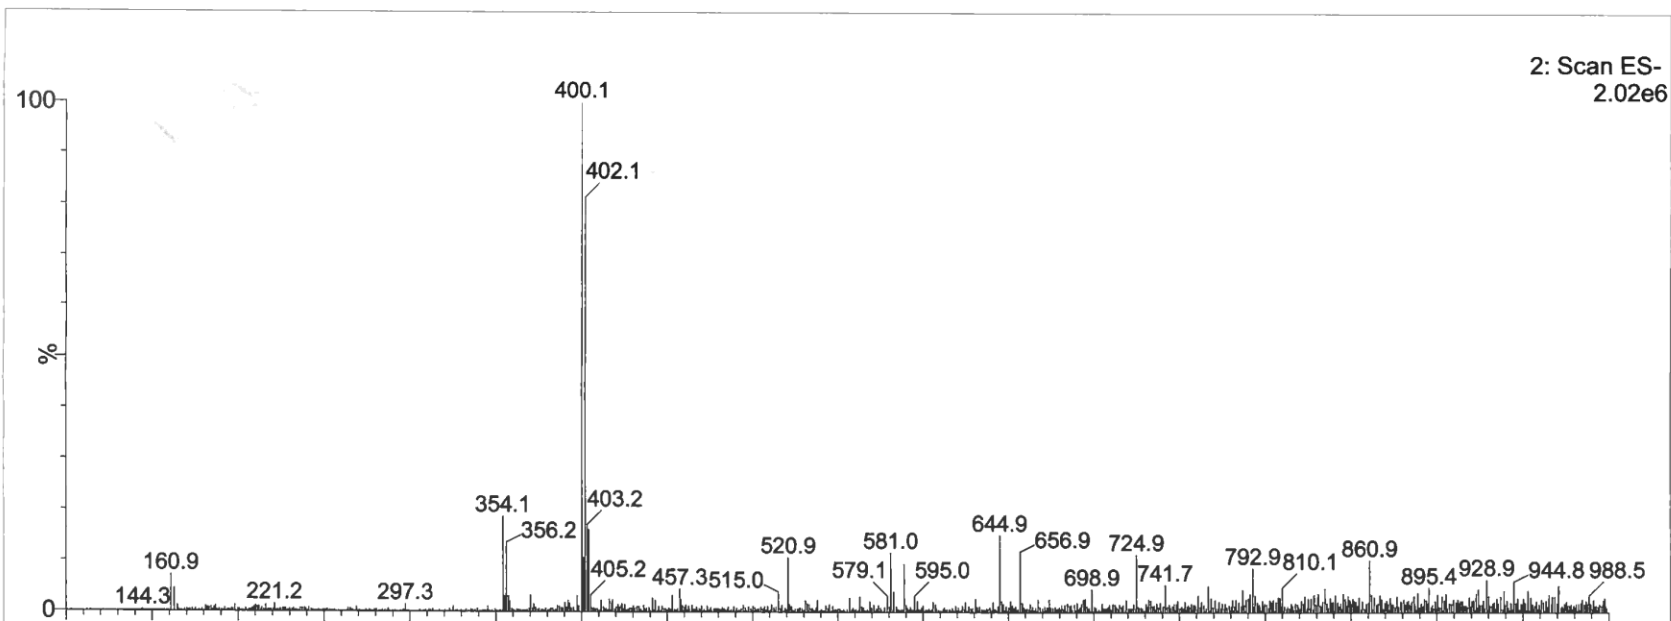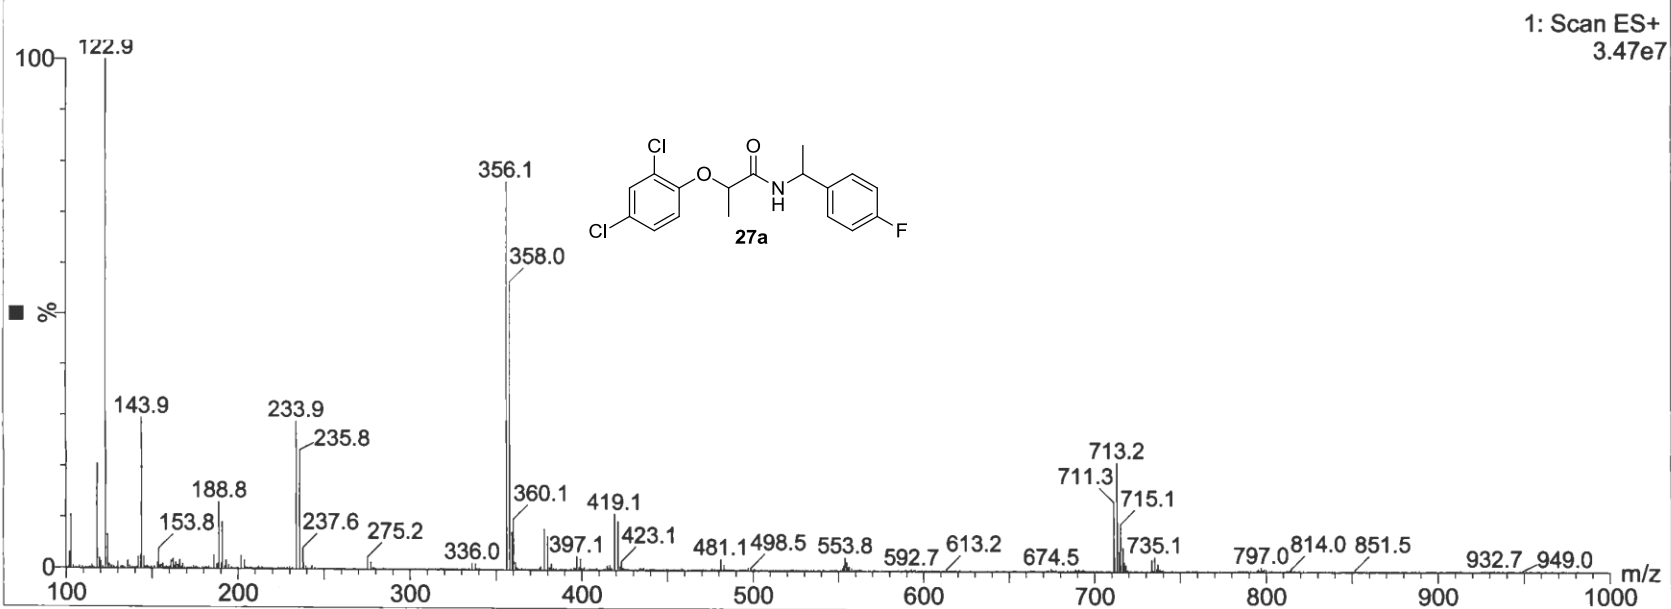

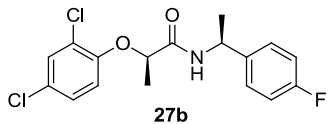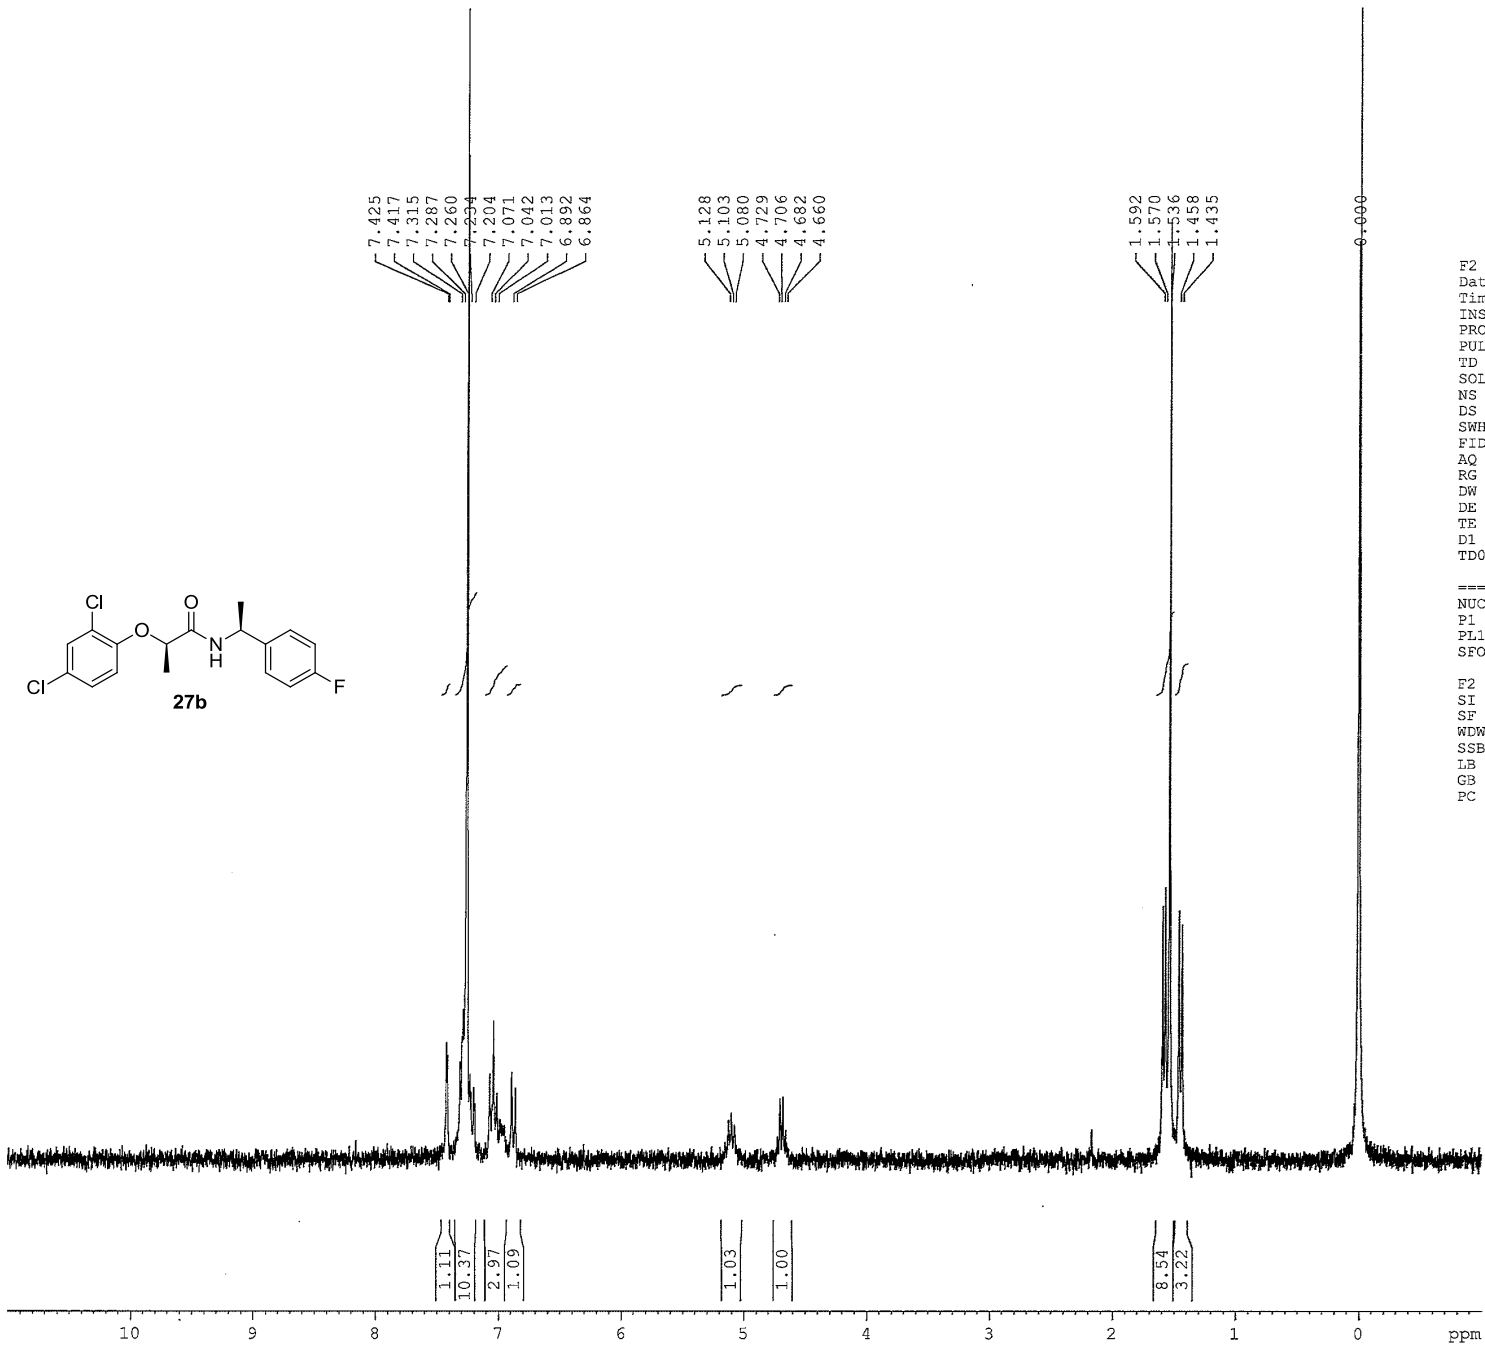

F2 - Acquisition Parameters

Date 20111104  
 Time 13.37  
 INSTRUM spect  
 PROBHD 5 mm BBO BB-1H  
 PULPROG zg30  
 TD 65536  
 SOLVENT CDCl3  
 NS 16  
 DS 2  
 SWH 6172.839 Hz  
 FIDRES 0.094190 Hz  
 AQ 5.3084660 sec  
 RG 4096  
 DW 81.000 usec  
 DE 6.50 usec  
 TE 298.2 K  
 D1 1.00000000 sec  
 TDO 1

----- CHANNEL f1 -----

NUC1 1H  
 P1 10.00 usec  
 PL1 9.20 dB  
 SFOL 299.5018495 MHz

F2 - Processing parameters

SI 32768  
 SF 299.5000058 MHz  
 WDW EM  
 SSB 0  
 LB 0.30 Hz  
 GB 0  
 PC 1.00

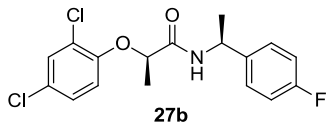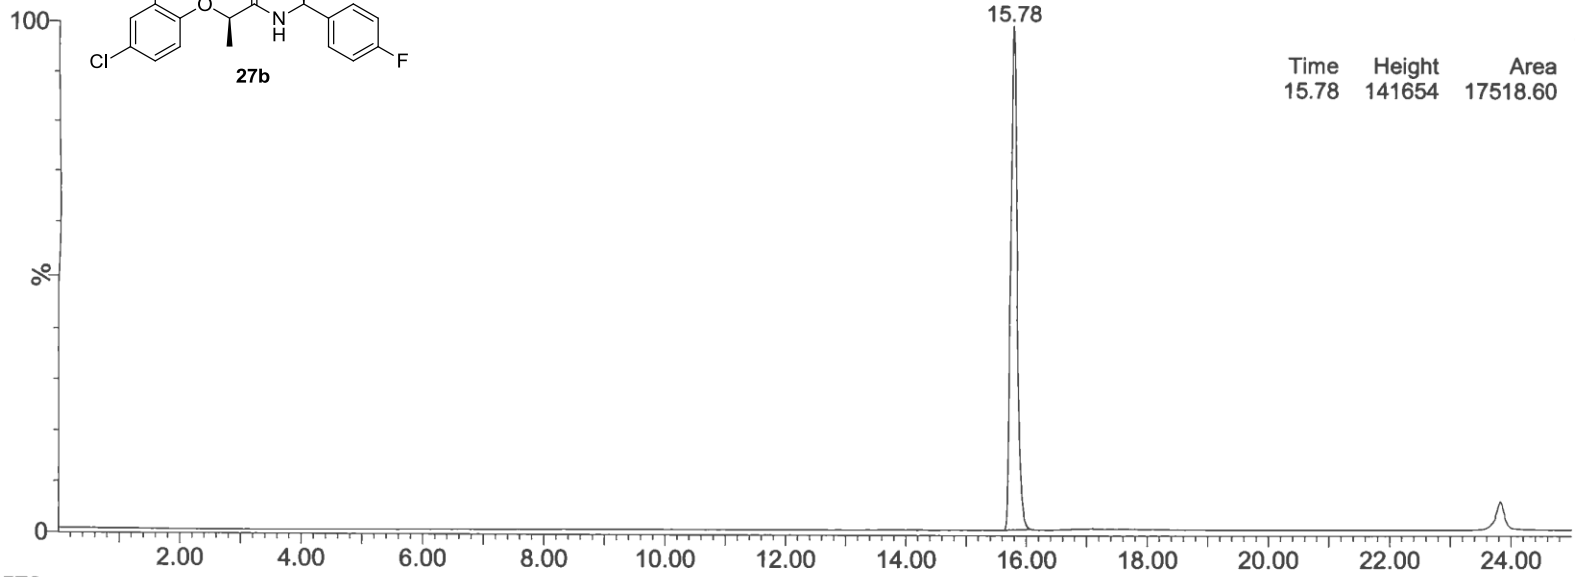

ELSD  
An2  
1.43e5

| Time  | Height | Area     | Area%  |
|-------|--------|----------|--------|
| 15.78 | 141654 | 17518.60 | 100.00 |

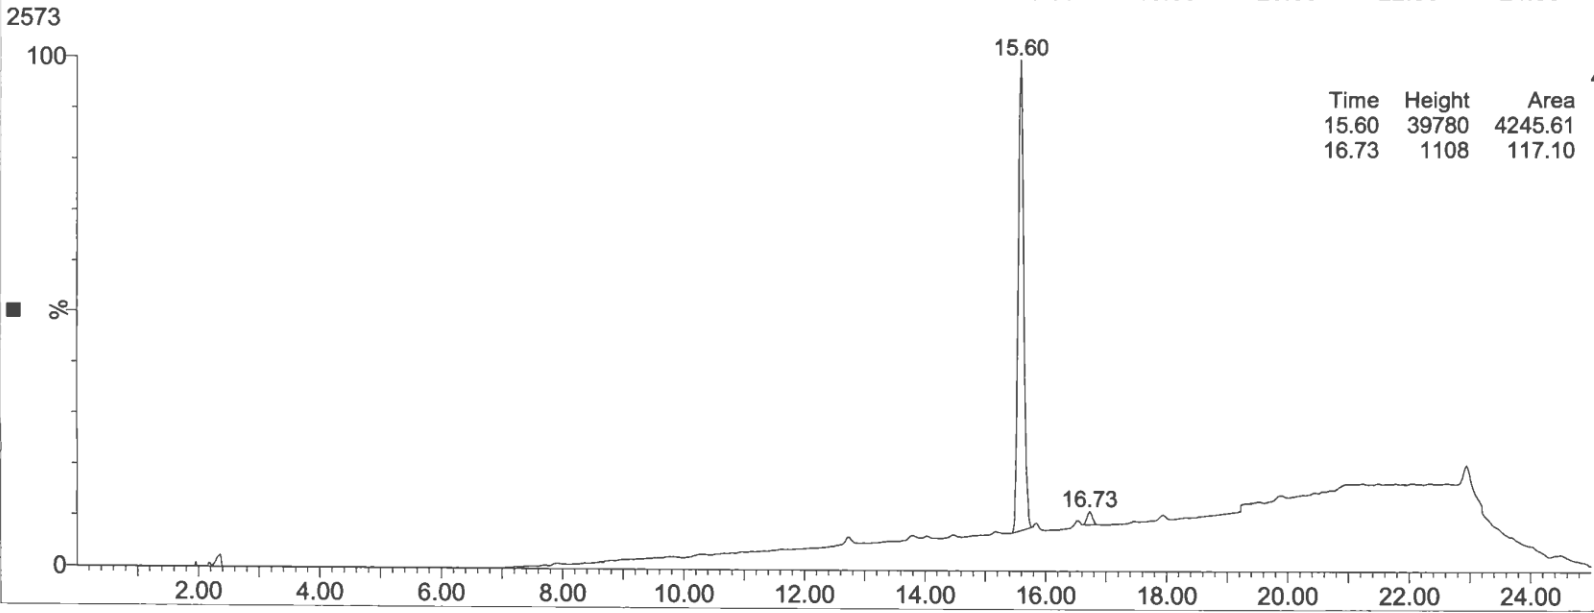

UV  
An1  
4.31e4

| Time  | Height | Area    | Area% |
|-------|--------|---------|-------|
| 15.60 | 39780  | 4245.61 | 97.32 |
| 16.73 | 1108   | 117.10  | 2.68  |

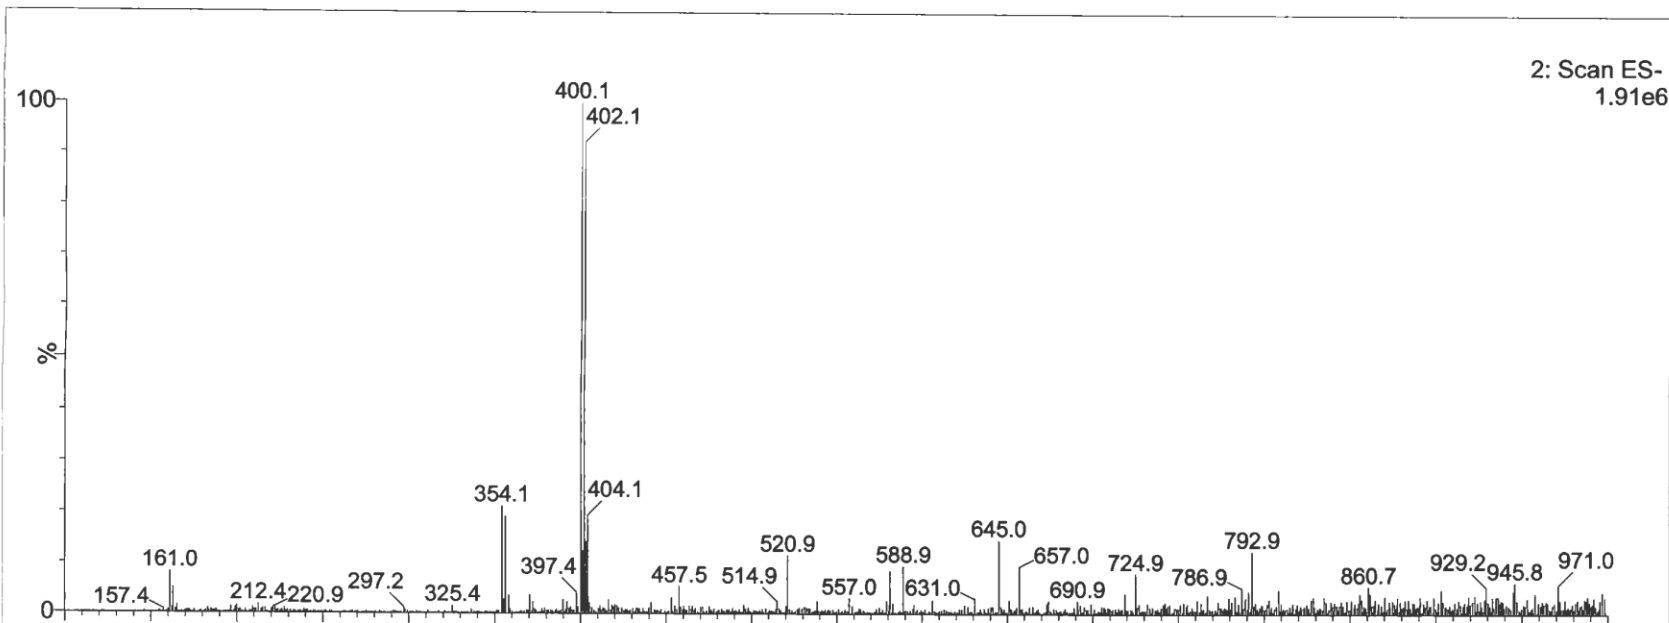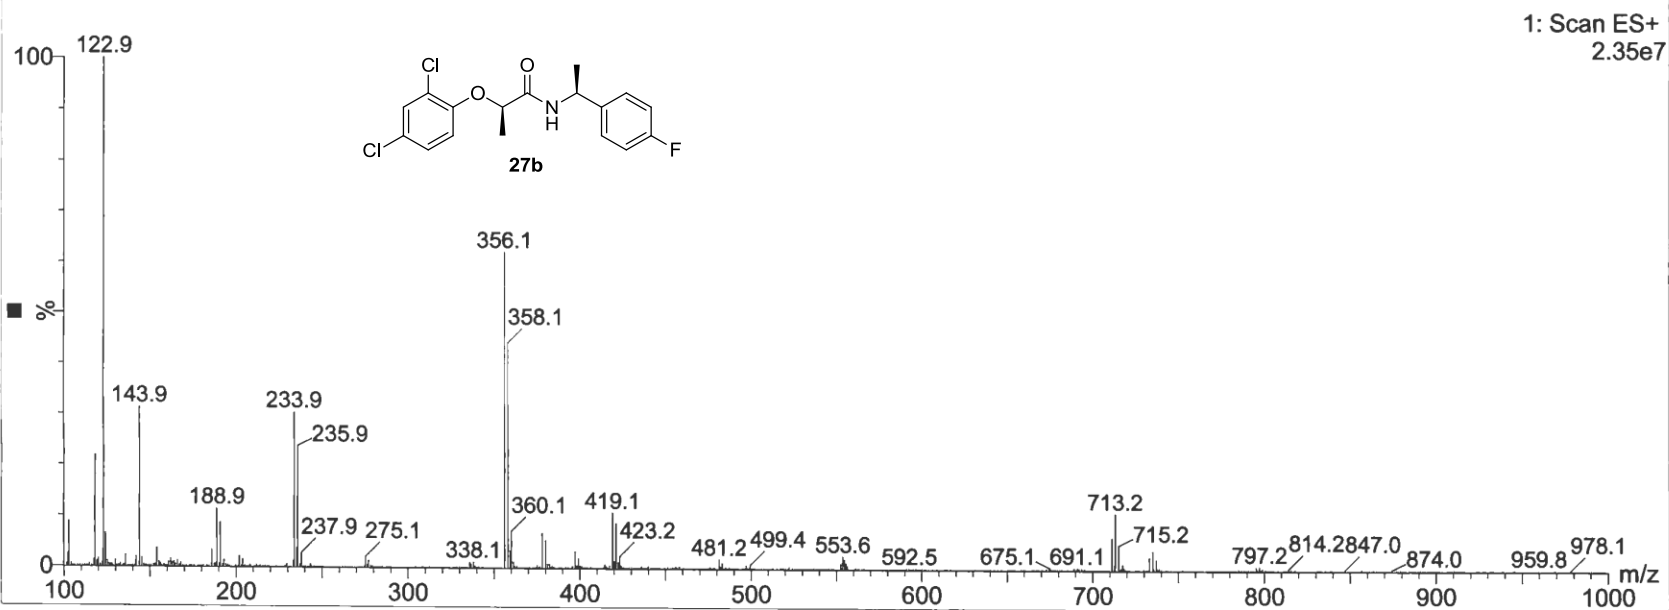



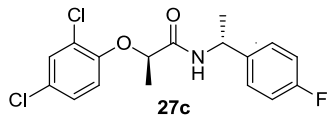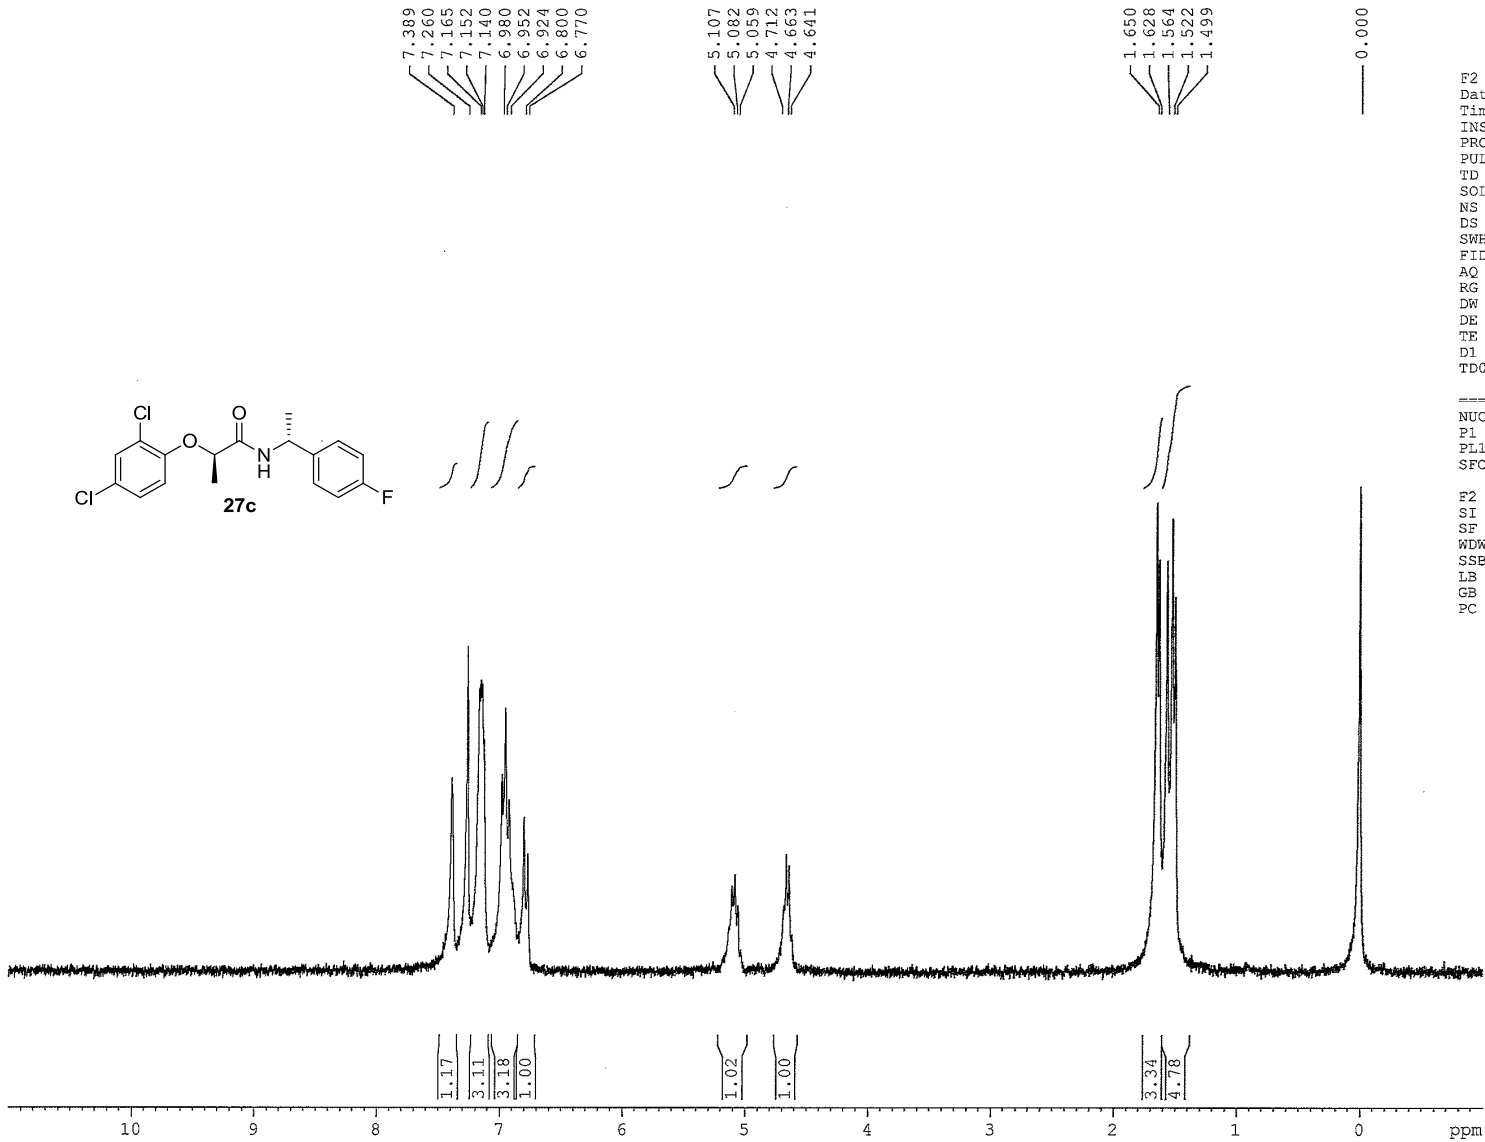

F2 - Acquisition Parameters  
 Date\_ 20111104  
 Time\_ 13.23  
 INSTRUM spect  
 PROBHD 5 mm BBO BB-1H  
 PULPROG zg30  
 TD 65536  
 SOLVENT CDCl3  
 NS 16  
 DS 2  
 SWH 6172.839 Hz  
 FIDRES 0.094190 Hz  
 AQ 5.3084660 sec  
 RG 2298.8  
 DW 81.000 usec  
 DE 6.50 usec  
 TF 298.2 K  
 D1 1.00000000 sec  
 TD0 1

===== CHANNEL f1 =====  
 NUC1 1H  
 P1 10.00 usec  
 PL1 9.20 dB  
 SF01 299.5018495 MHz

F2 - Processing parameters  
 SI 32768  
 SF 299.5000052 MHz  
 WDW EM  
 SSB 0  
 LB 0.30 Hz  
 GB 0  
 PC 1.00

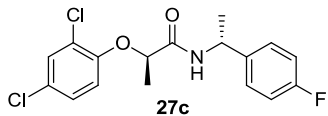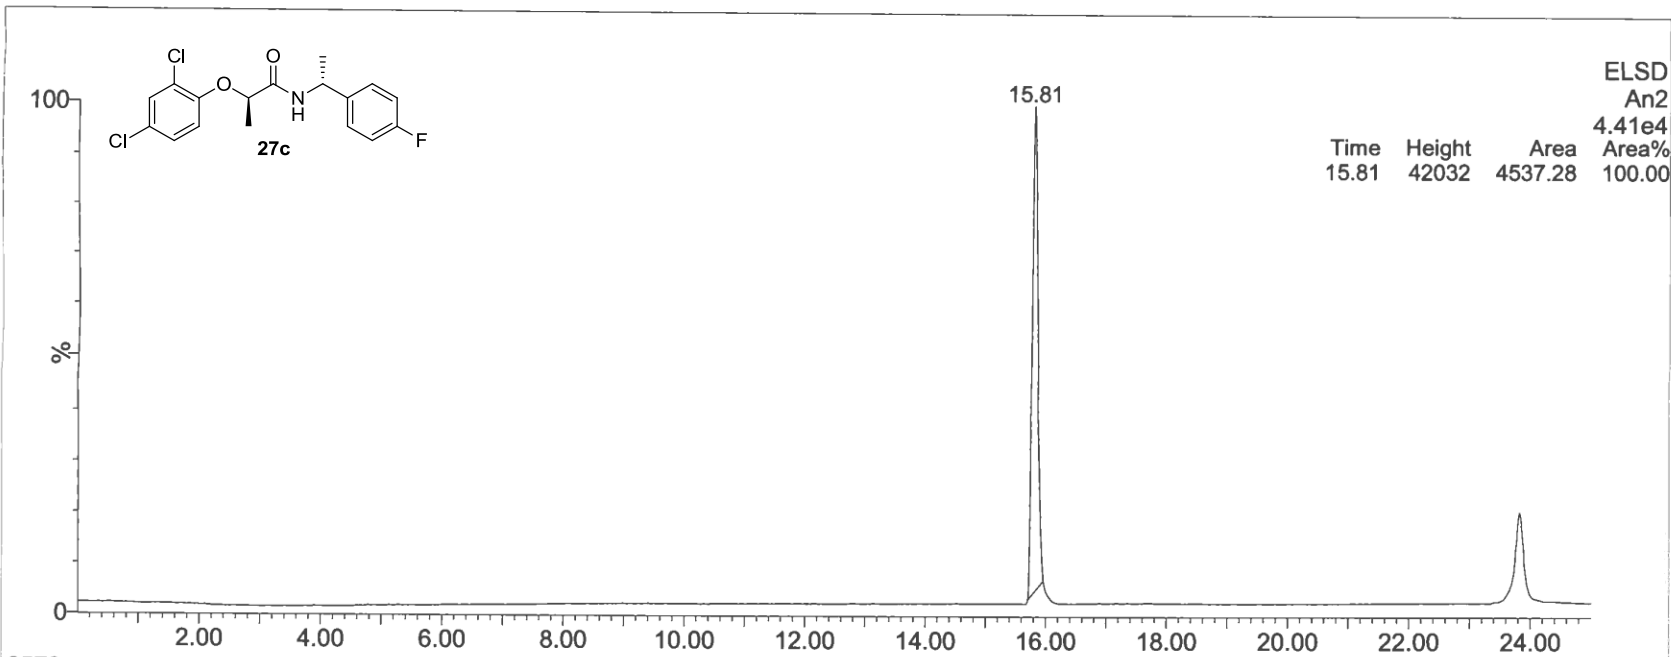

ELSD  
An2  
4.41e4

| Time  | Height | Area    | Area%  |
|-------|--------|---------|--------|
| 15.81 | 42032  | 4537.28 | 100.00 |

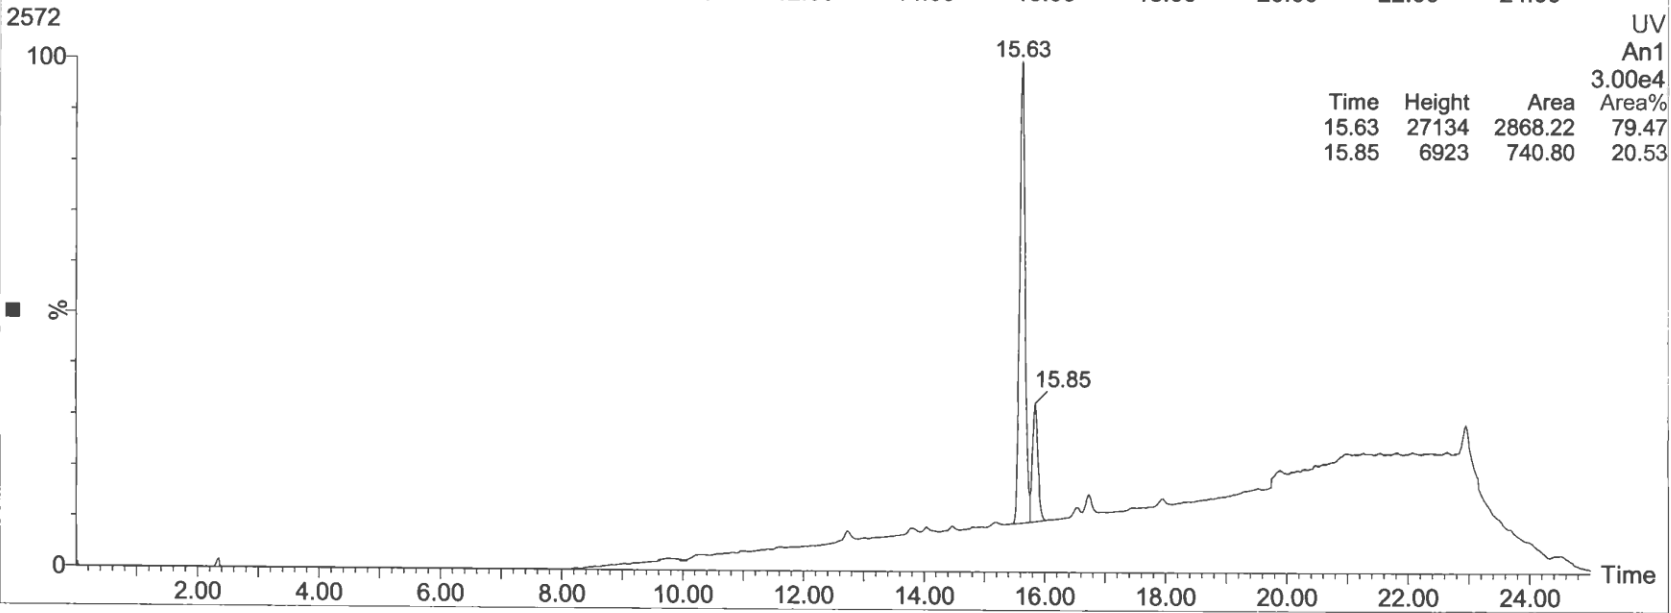

UV  
An1  
3.00e4

| Time  | Height | Area    | Area% |
|-------|--------|---------|-------|
| 15.63 | 27134  | 2868.22 | 79.47 |
| 15.85 | 6923   | 740.80  | 20.53 |

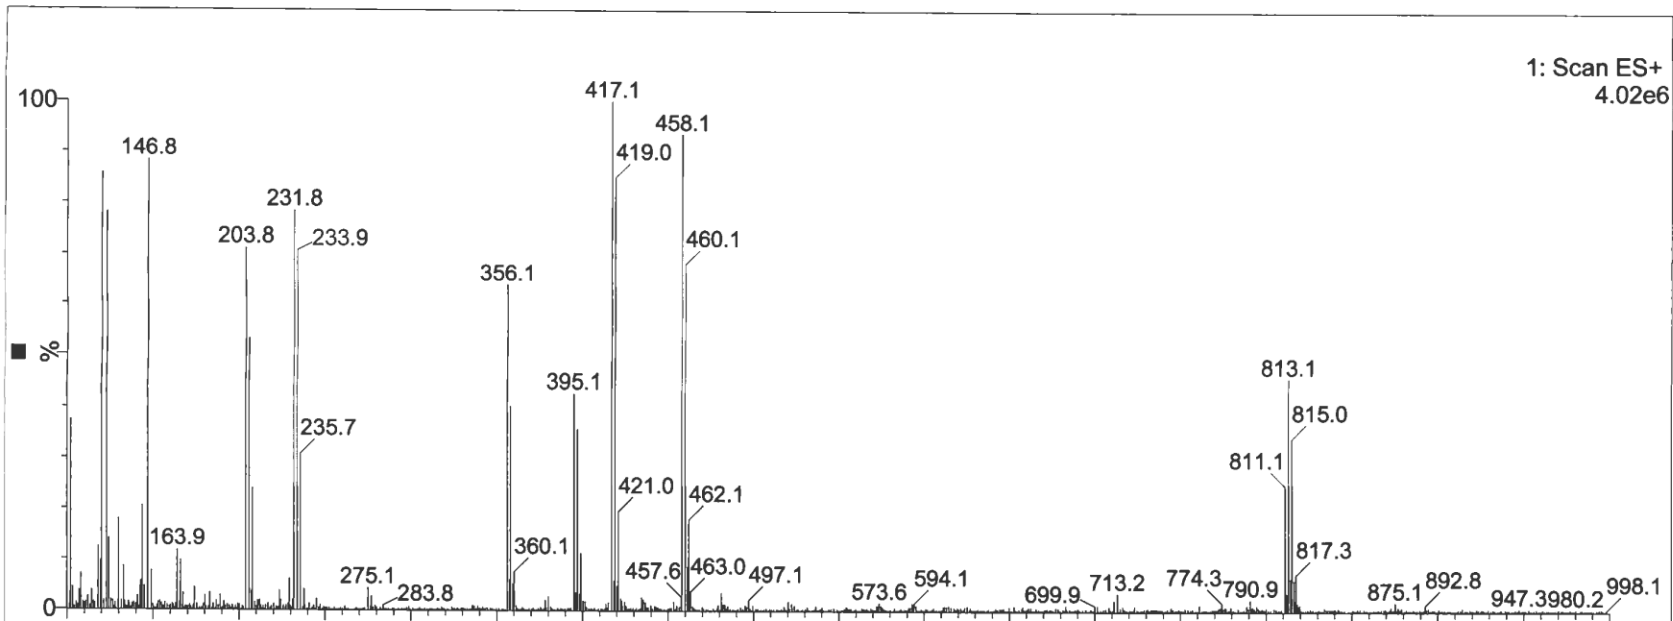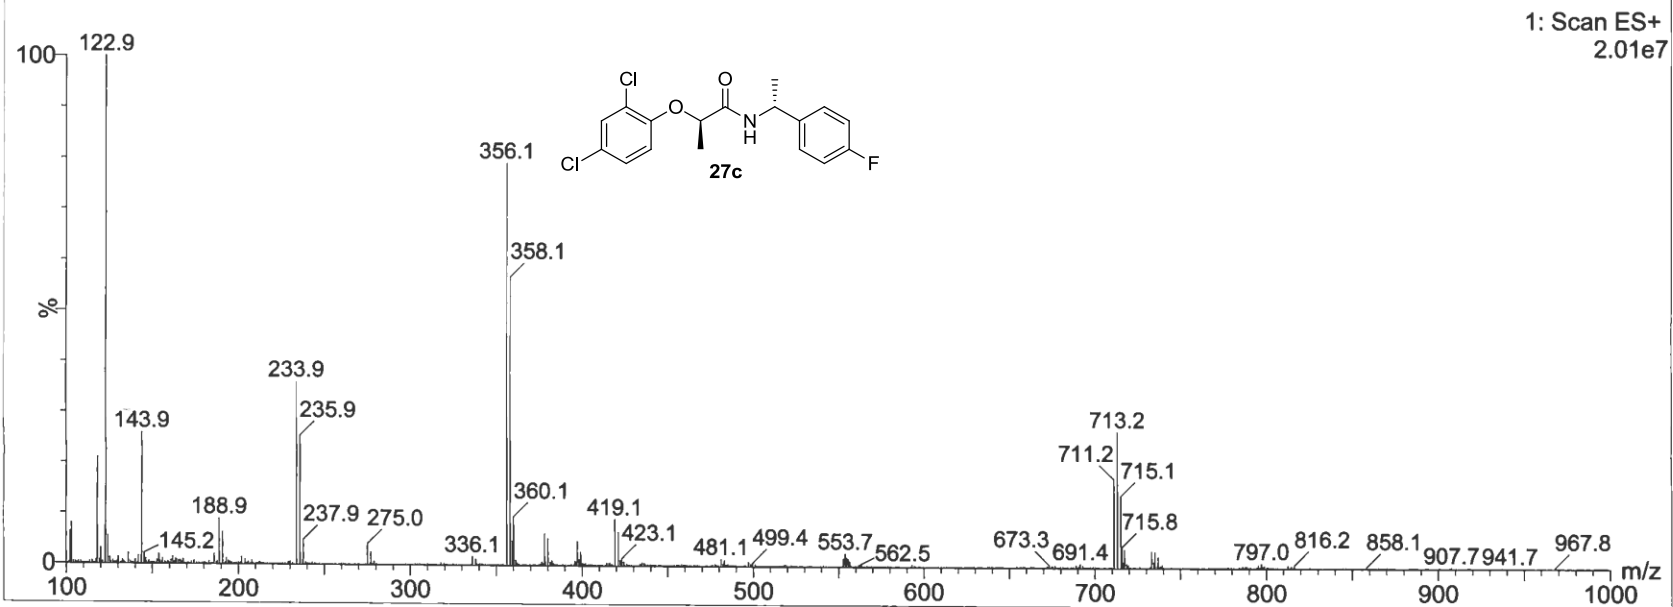

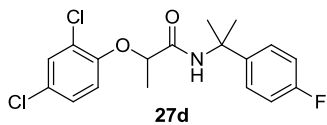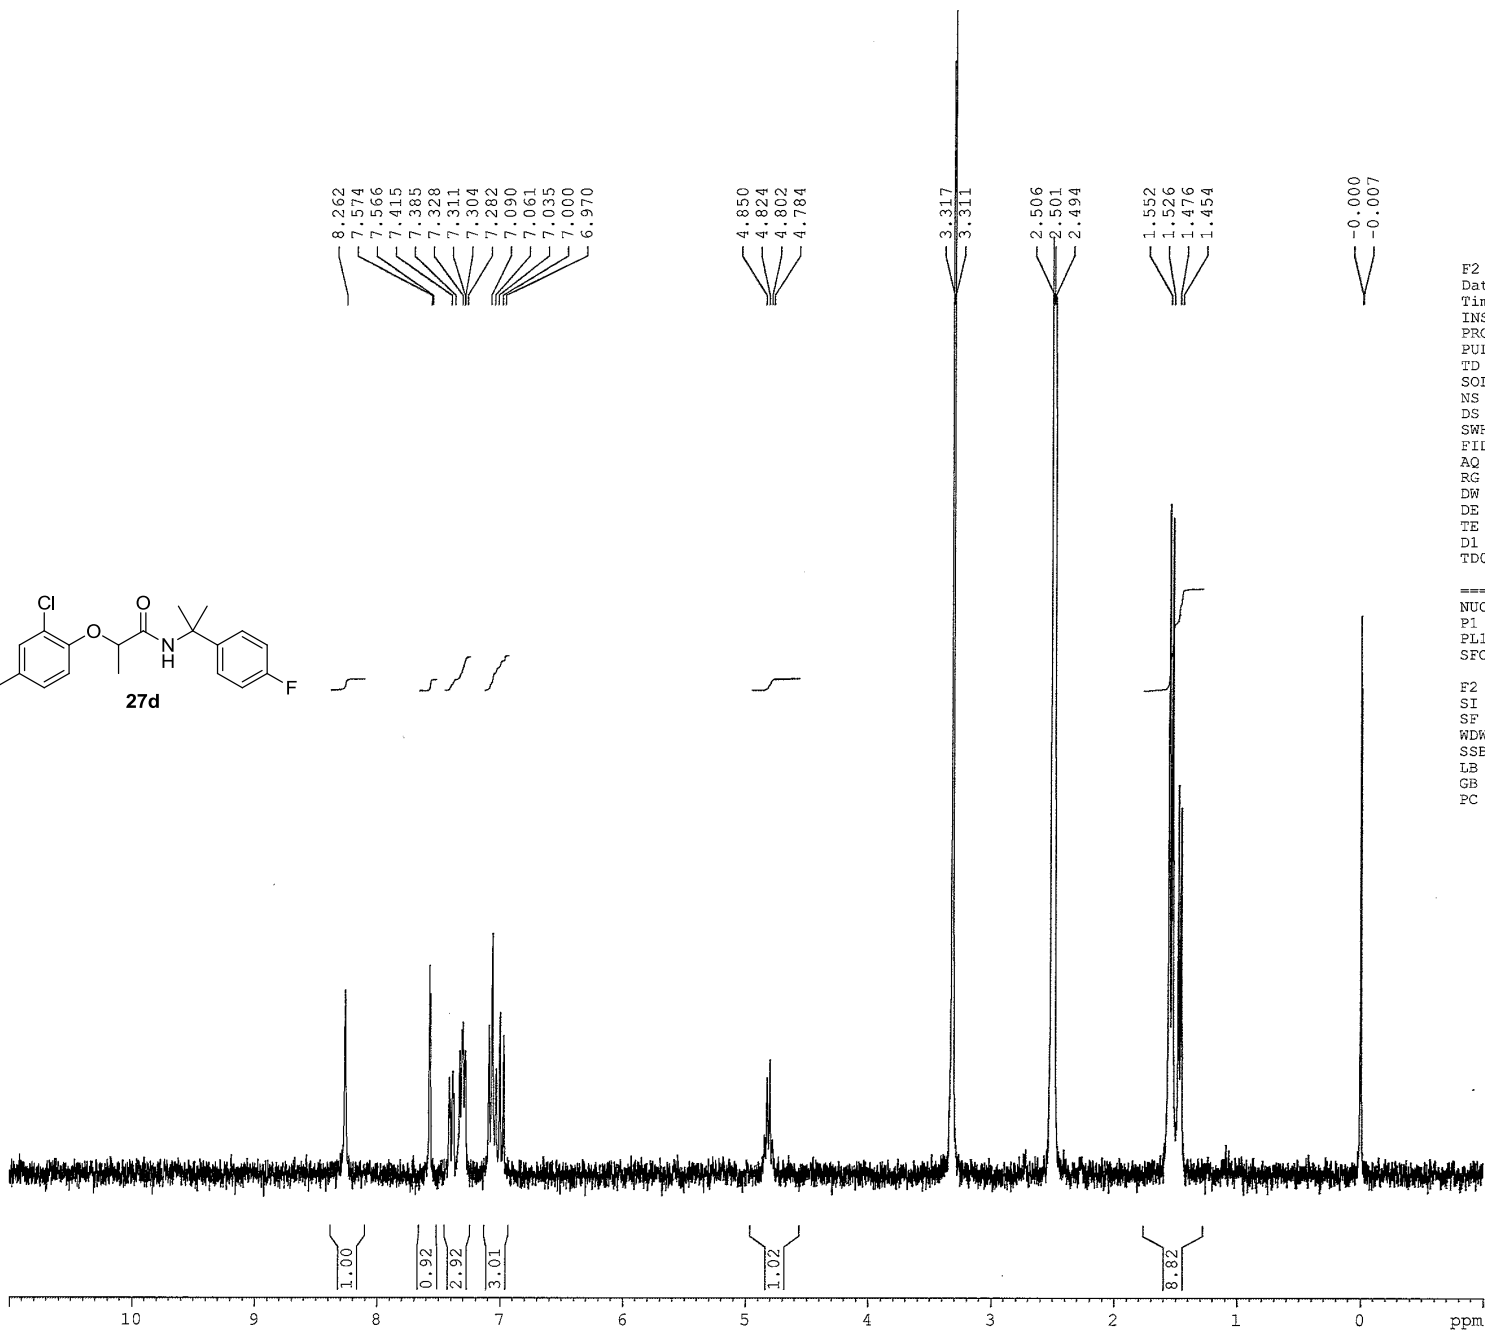

F2 - Acquisition Parameters  
 Date\_ 20120124  
 Time\_ 15.39  
 INSTRUM spect  
 PROBHD 5 mm BBO BB-1H  
 PULPROG zg30  
 TD 65536  
 SOLVENT DMSO  
 NS 16  
 DS 2  
 SWH 6172.839 Hz  
 FIDRES 0.094190 Hz  
 AQ 5.3084660 sec  
 RG 4597.6  
 DW 81.000 usec  
 DE 6.50 usec  
 TE 298.2 K  
 D1 1.0000000 sec  
 TD0 1

===== CHANNEL f1 =====  
 NUC1 1H  
 P1 10.00 usec  
 PL1 9.20 dB  
 SFO1 299.5018495 MHz

F2 - Processing parameters  
 SI 32768  
 SF 299.5000015 MHz  
 WDW EM  
 SSB 0  
 LB 0.30 Hz  
 GB 0  
 PC 1.00

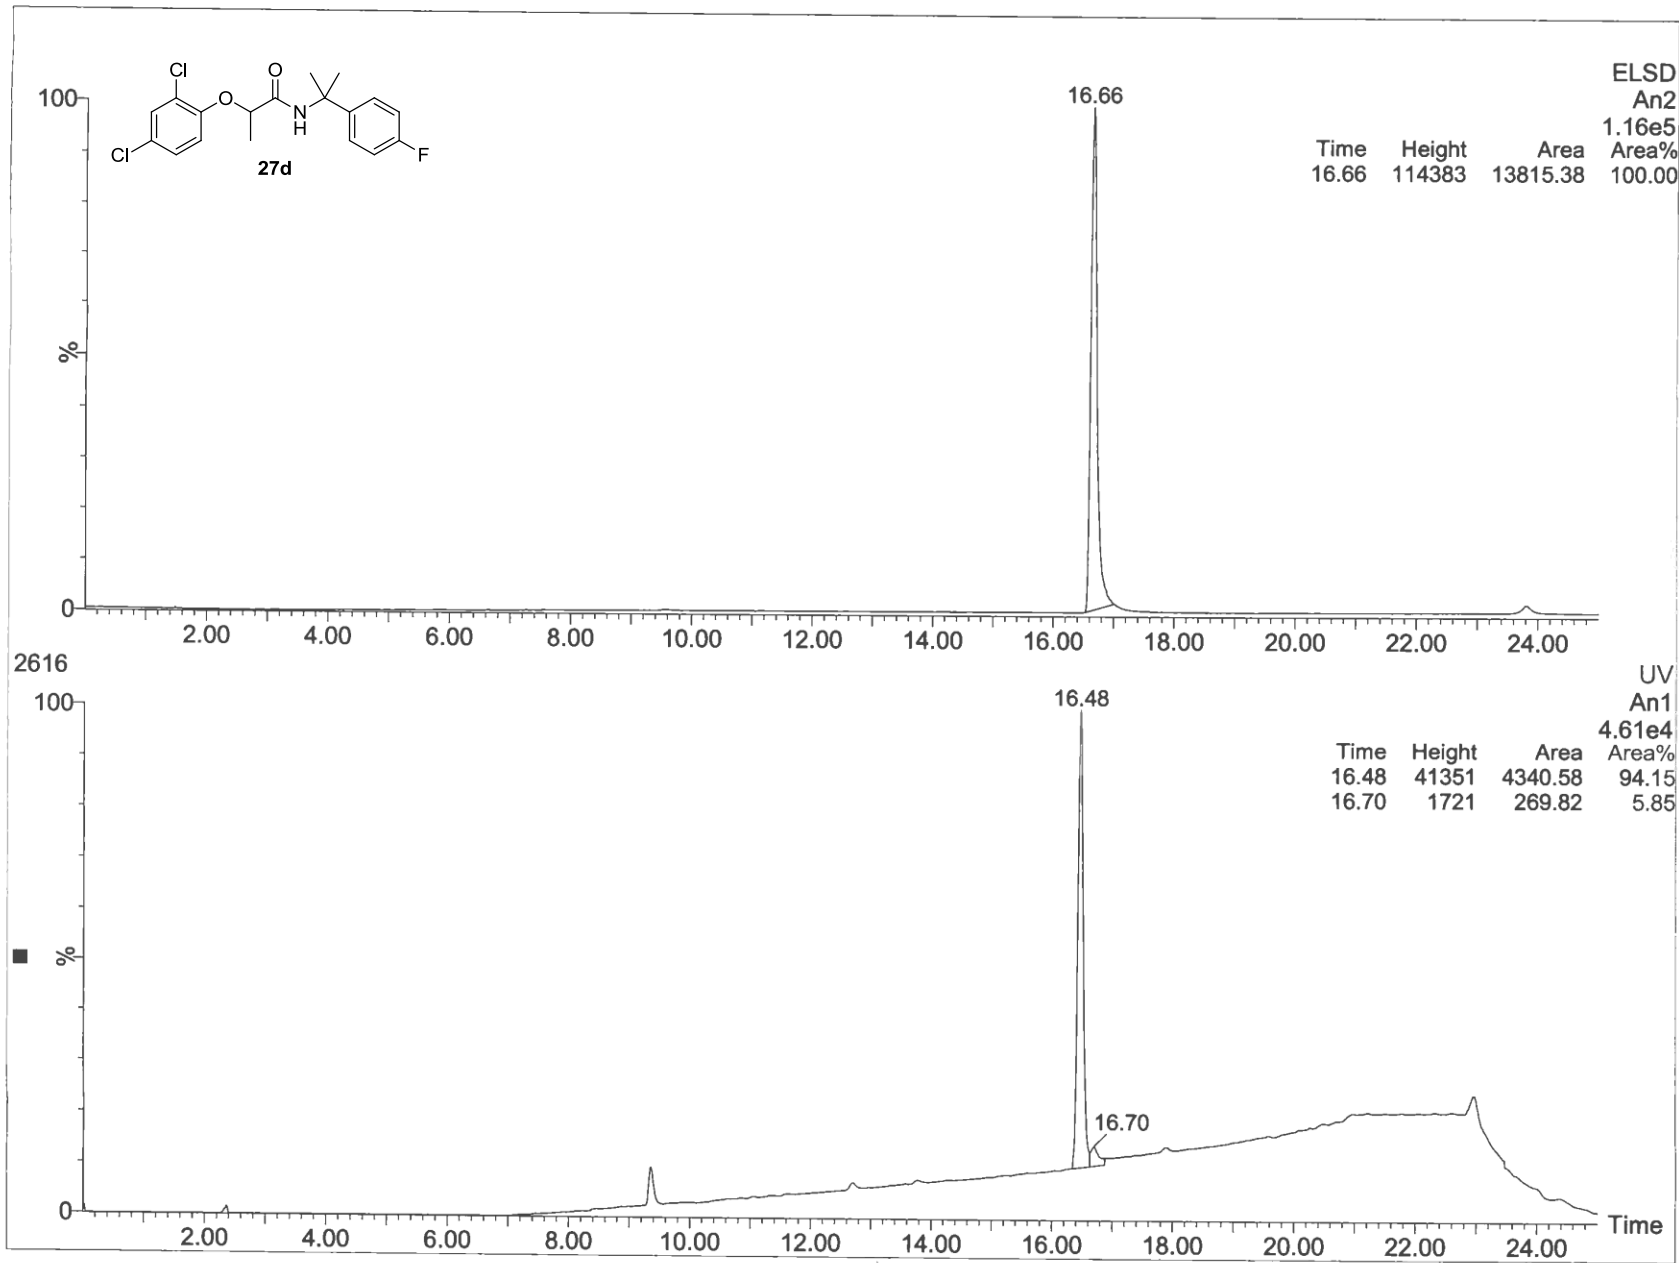

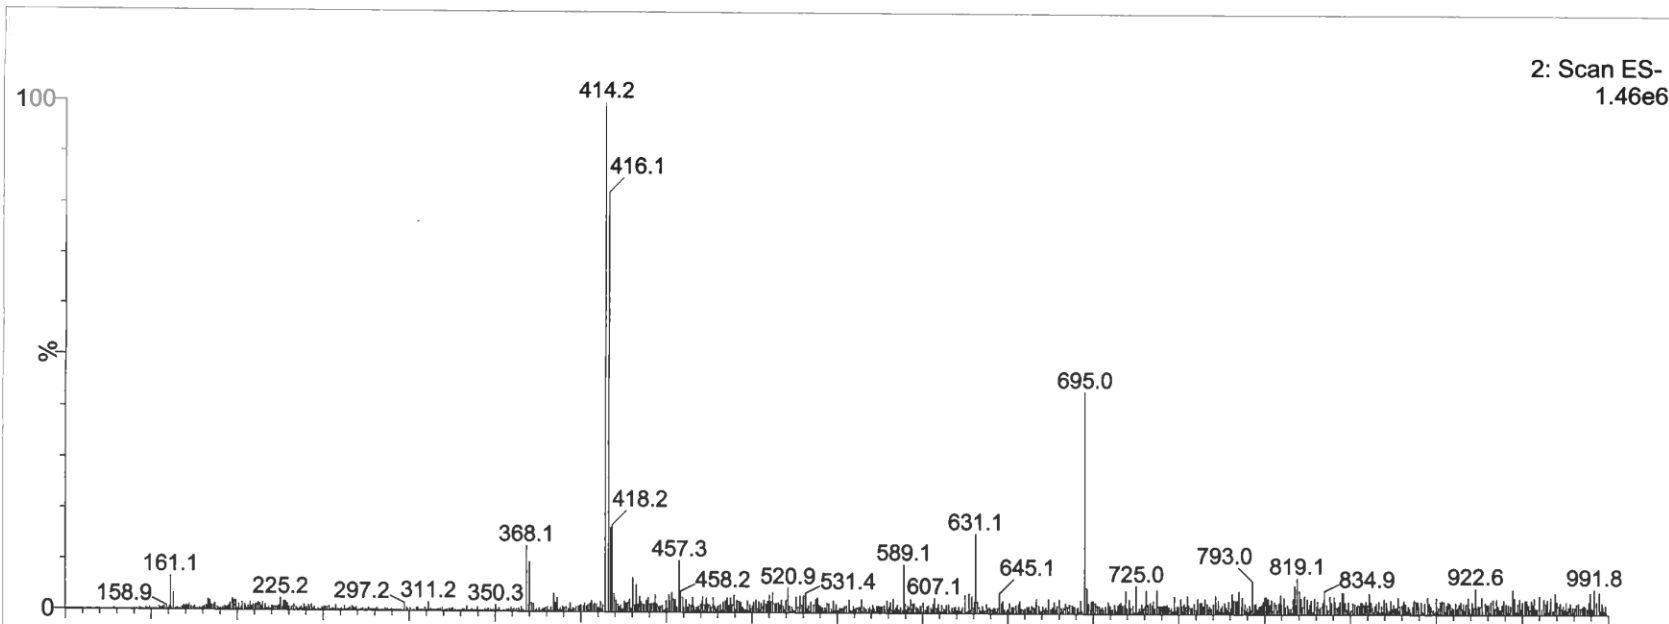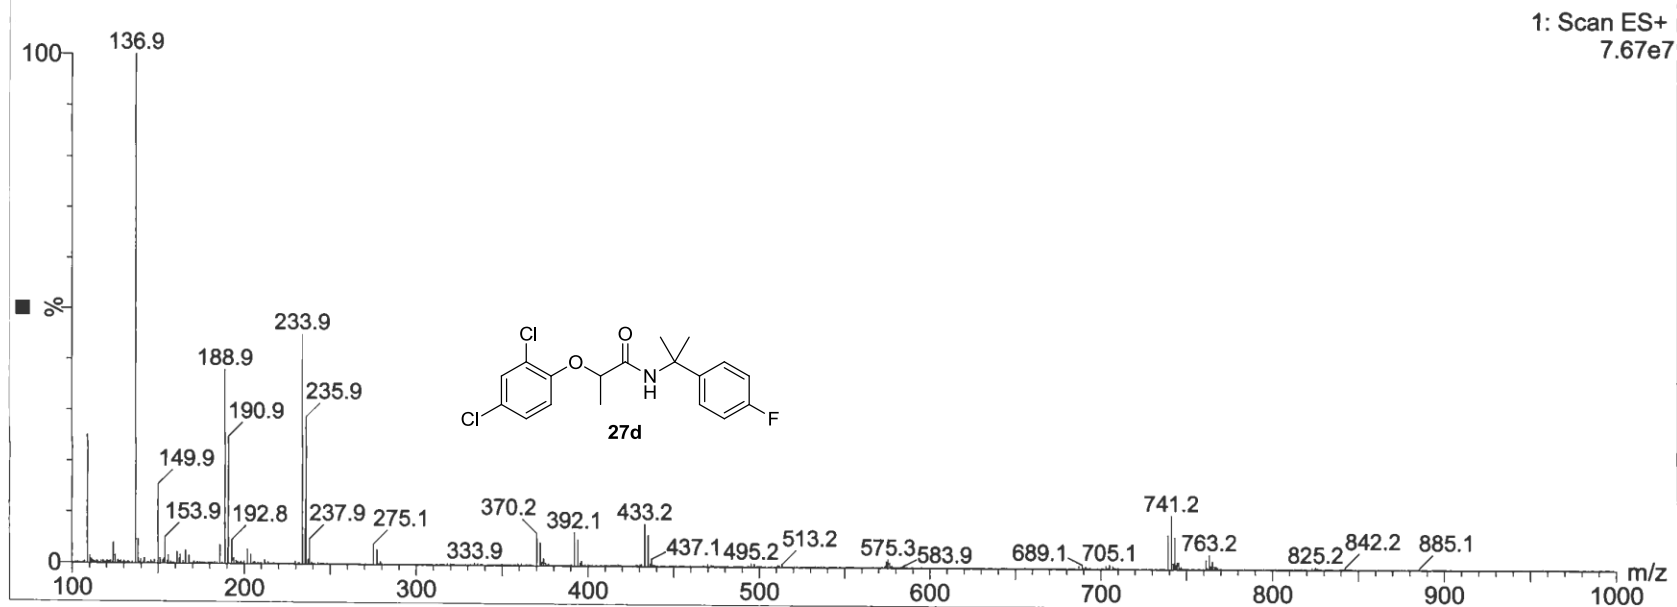

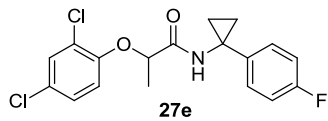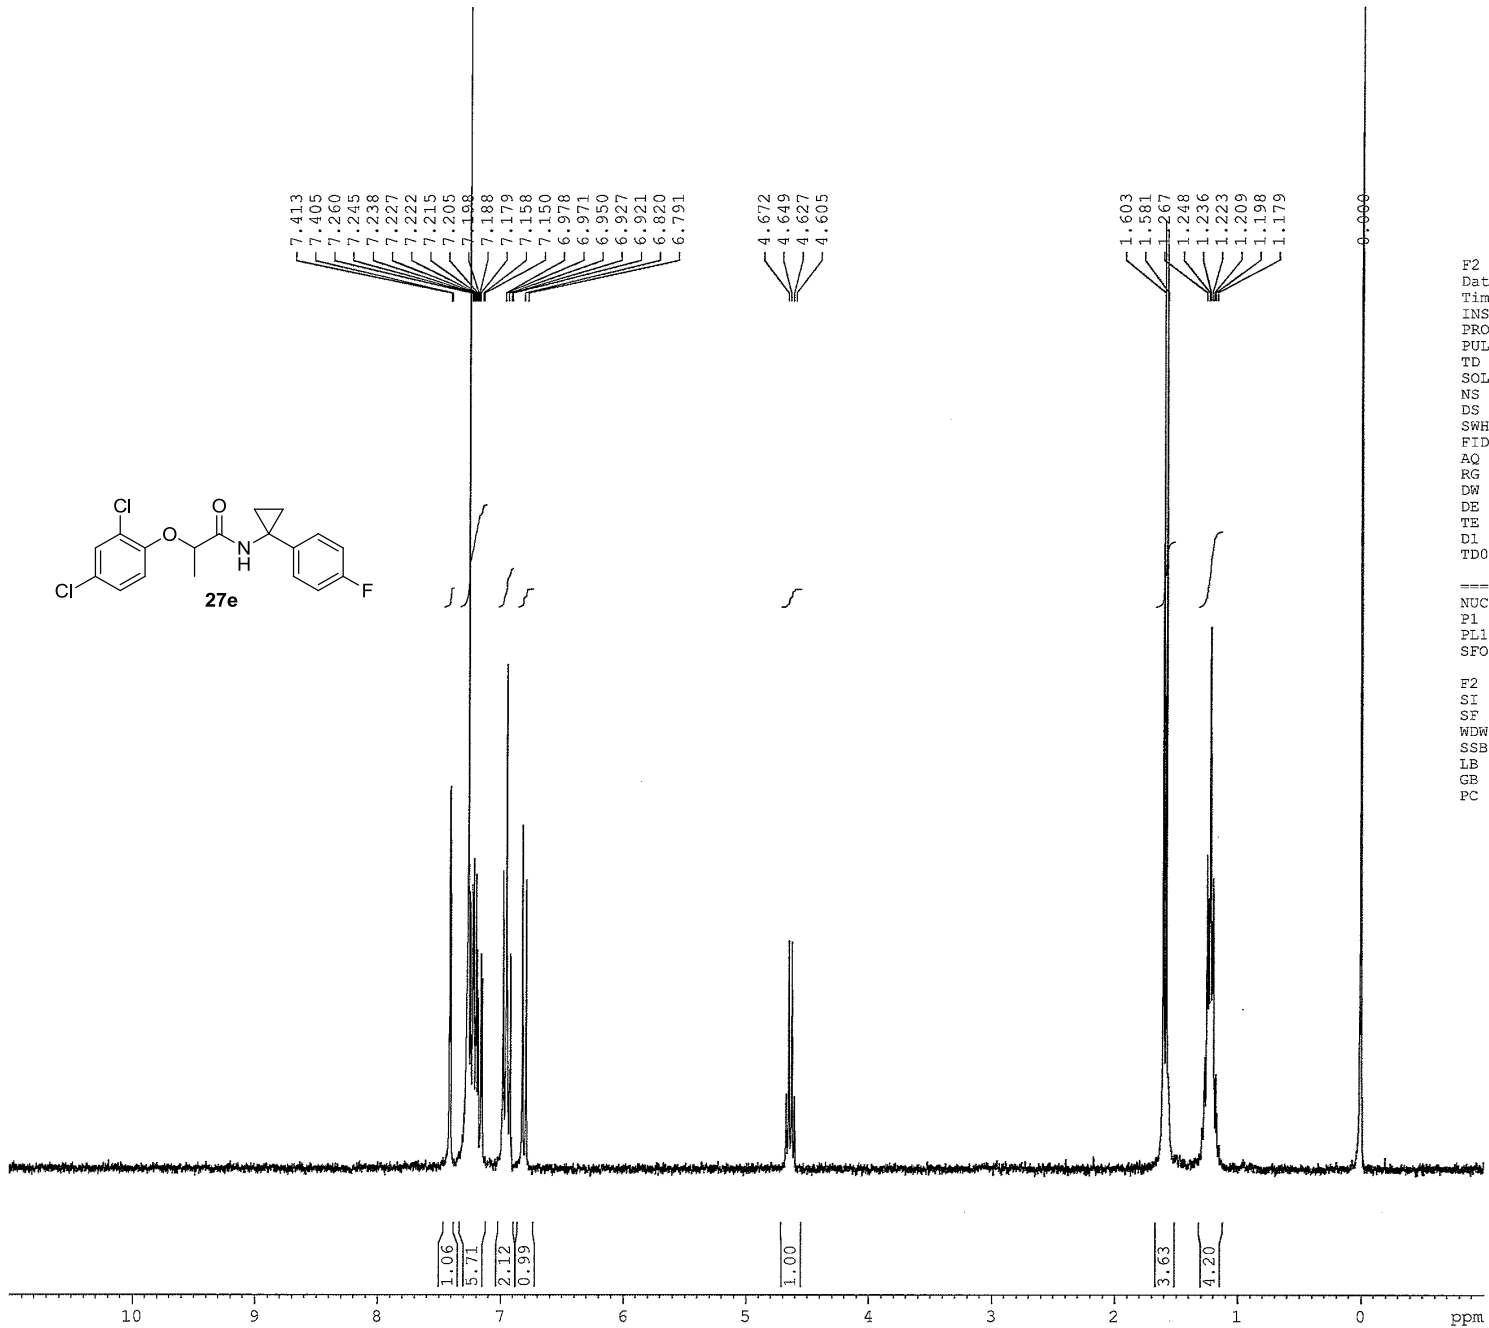

F2 - Acquisition Parameters  
 Date\_ 20120316  
 Time 14.56  
 INSTRUM spect  
 PROBHD 5 mm BBO BB-1H  
 PULPROG zg30  
 TD 65536  
 SOLVENT CDC13  
 NS 16  
 DS 2  
 SWH 6172.839 Hz  
 FIDRES 0.094190 Hz  
 AQ 5.3084660 sec  
 RG 3649.1  
 DW 81.000 usec  
 DE 6.50 usec  
 TE 298.2 K  
 D1 1.00000000 sec  
 TDO 1

===== CHANNEL f1 =====  
 NUC1 1H  
 P1 10.00 usec  
 PL1 9.20 dB  
 SFO1 299.5018495 MHz

F2 - Processing parameters  
 SI 32768  
 SF 299.5000052 MHz  
 WDW EM  
 SSB 0  
 LB 0.30 Hz  
 GB 0  
 PC 1.00

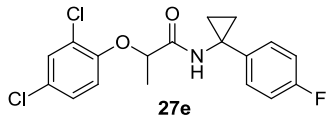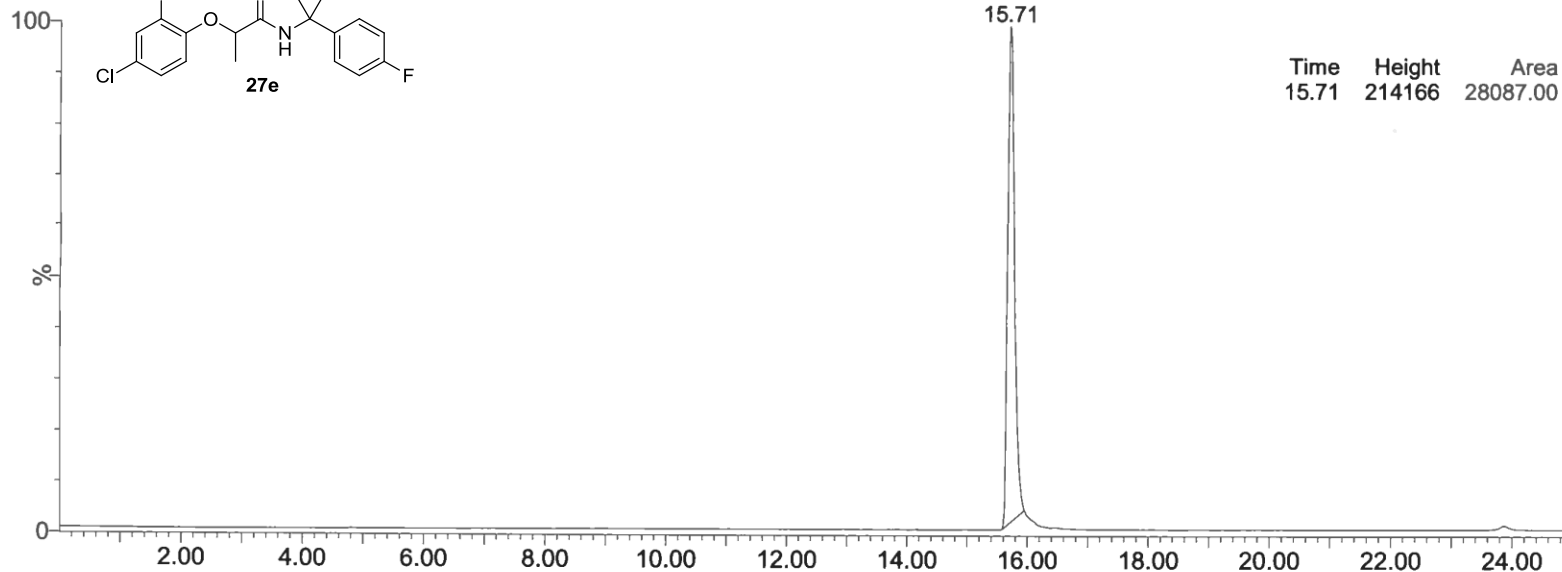

ELSD  
An2  
2.20e5

| Time  | Height | Area     | Area%  |
|-------|--------|----------|--------|
| 15.71 | 214166 | 28087.00 | 100.00 |

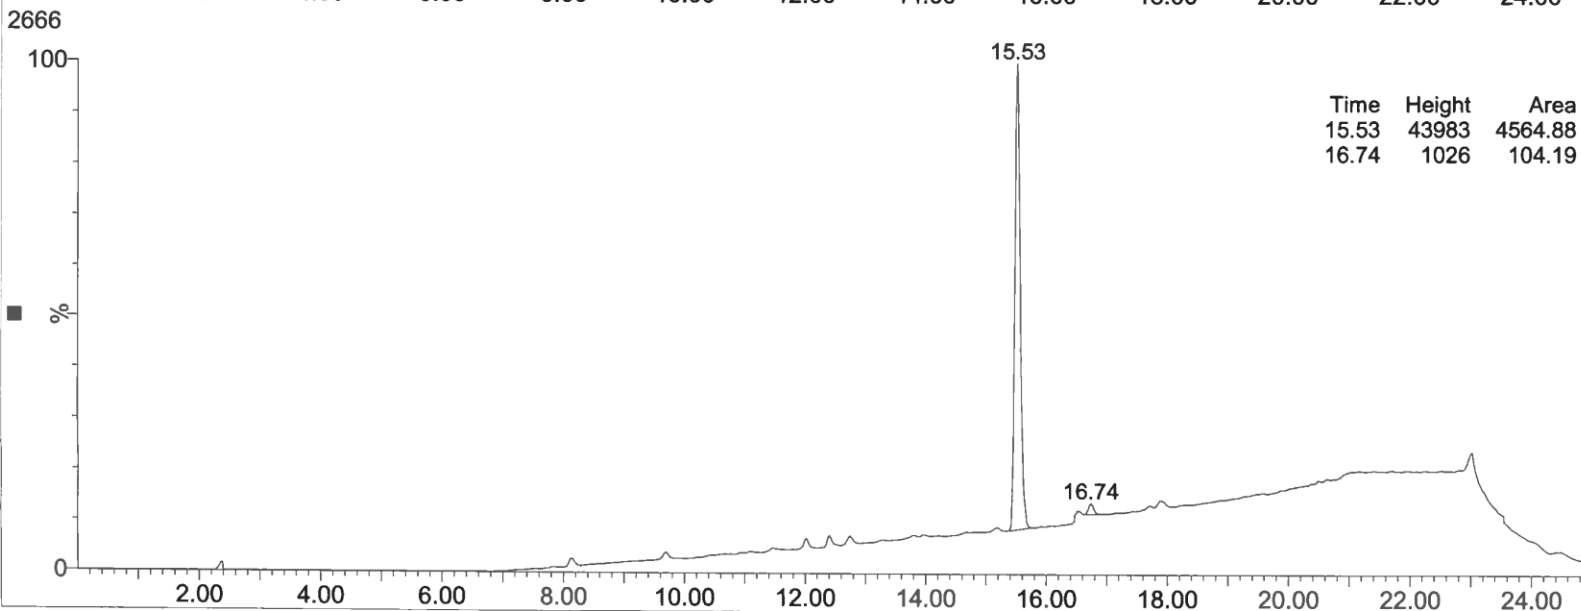

UV  
An1  
4.82e4

| Time  | Height | Area    | Area% |
|-------|--------|---------|-------|
| 15.53 | 43983  | 4564.88 | 97.77 |
| 16.74 | 1026   | 104.19  | 2.23  |



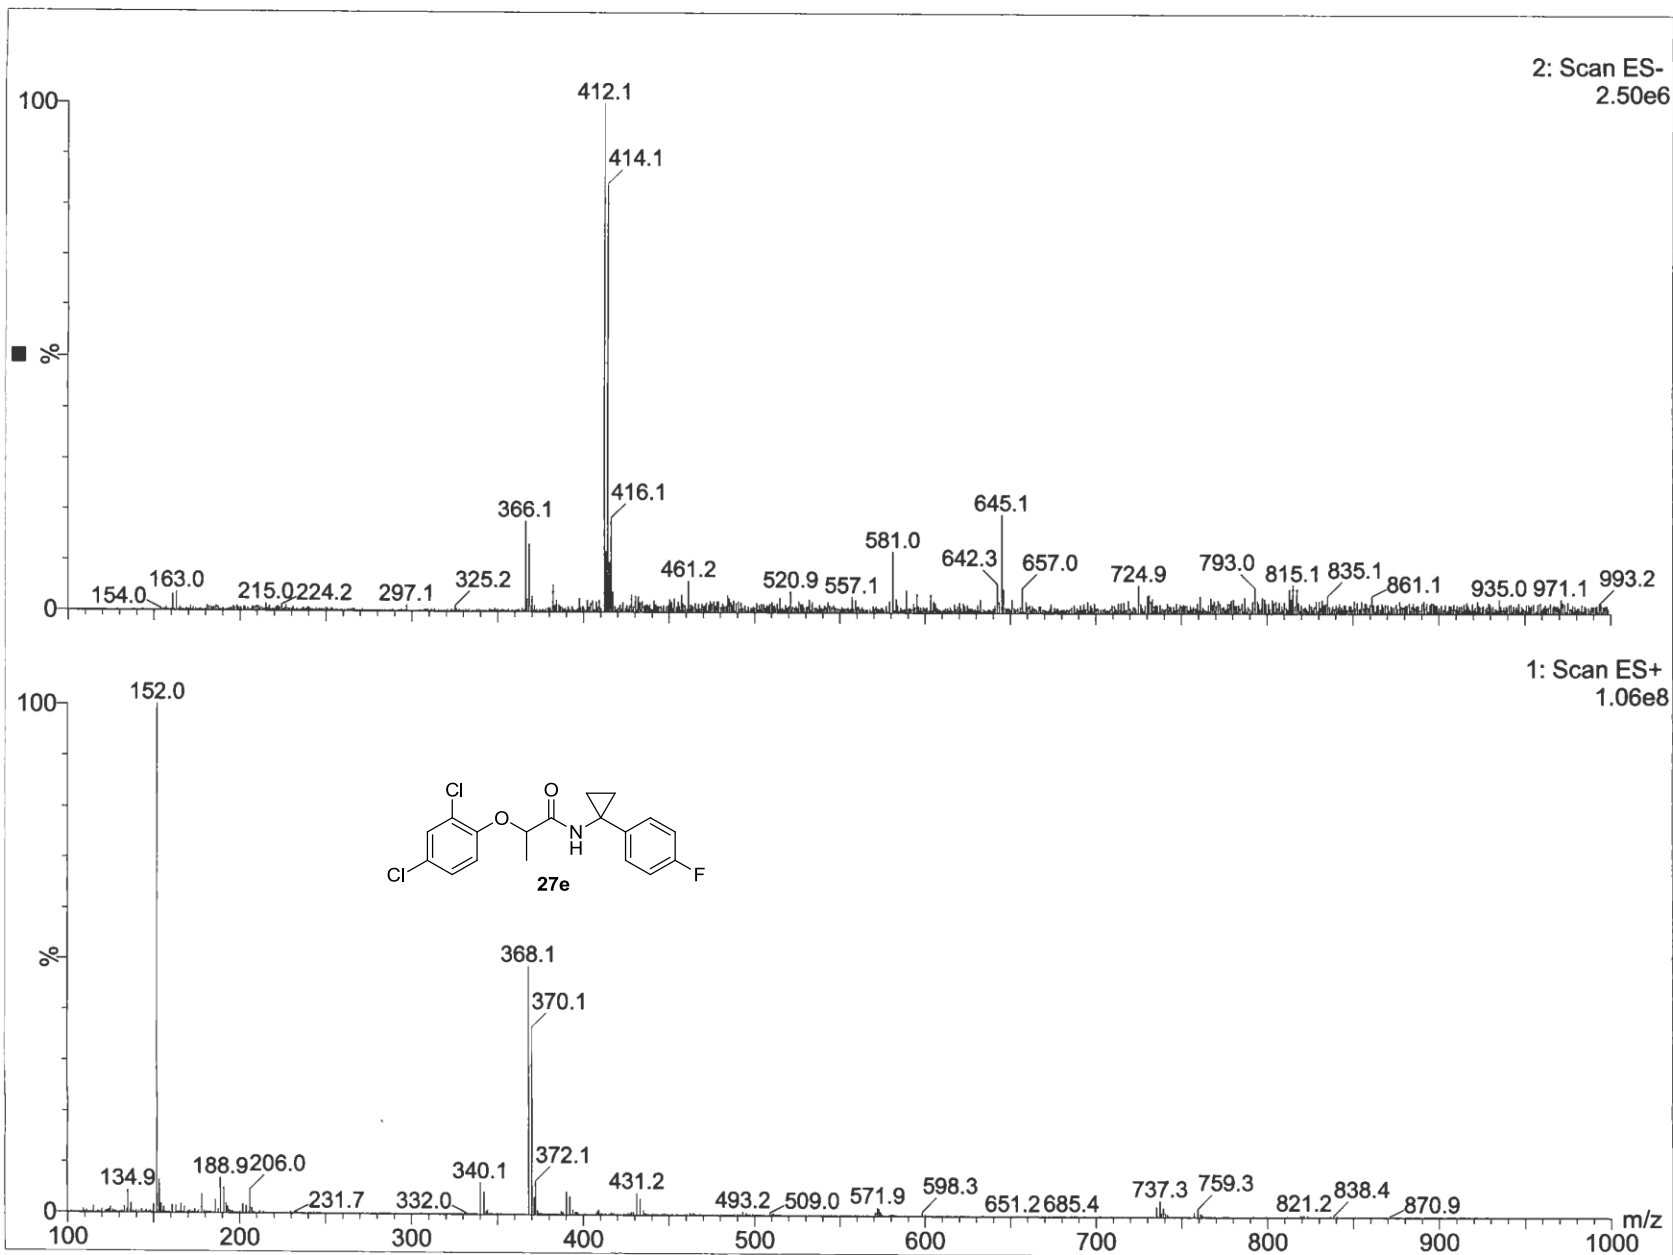

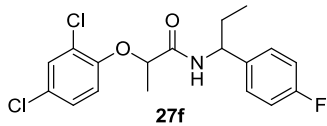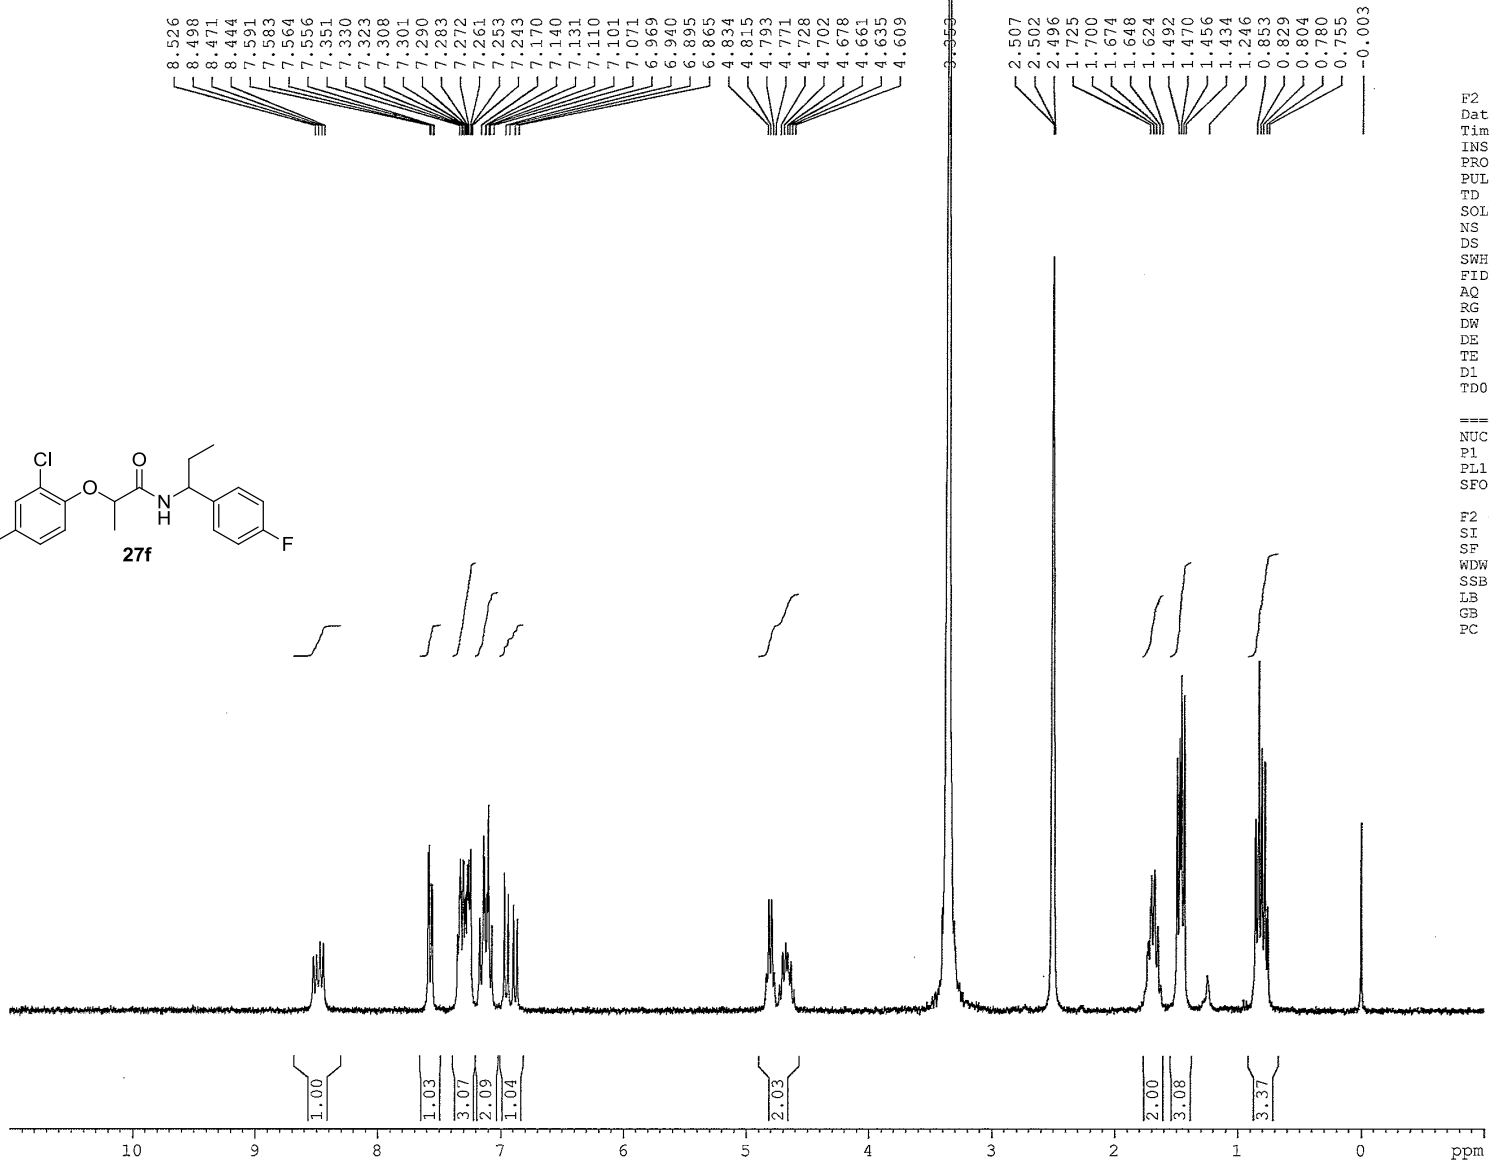

F2 - Acquisition Parameters

Date\_ 20120111  
 Time 12.13  
 INSTRUM spect  
 PROBHD 5 mm BBO BB-1H  
 PULPROG zg30  
 TD 65536  
 SOLVENT DMSO  
 NS 16  
 DS 2  
 SWH 6172.839 Hz  
 FIDRES 0.094190 Hz  
 AQ 5.3084660 sec  
 RG 1290.2  
 DW 81.000 usec  
 DE 6.50 usec  
 TE 298.2 K  
 D1 1.00000000 sec  
 TDO 1

===== CHANNEL f1 =====

NUC1 1H  
 P1 10.00 usec  
 PL1 9.20 dB  
 SFO1 299.5018495 MHz

F2 - Processing parameters

SI 32768  
 SF 299.4999989 MHz  
 WDW EM  
 SSB 0  
 LB 0.30 Hz  
 GB 0  
 PC 1.00

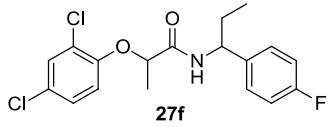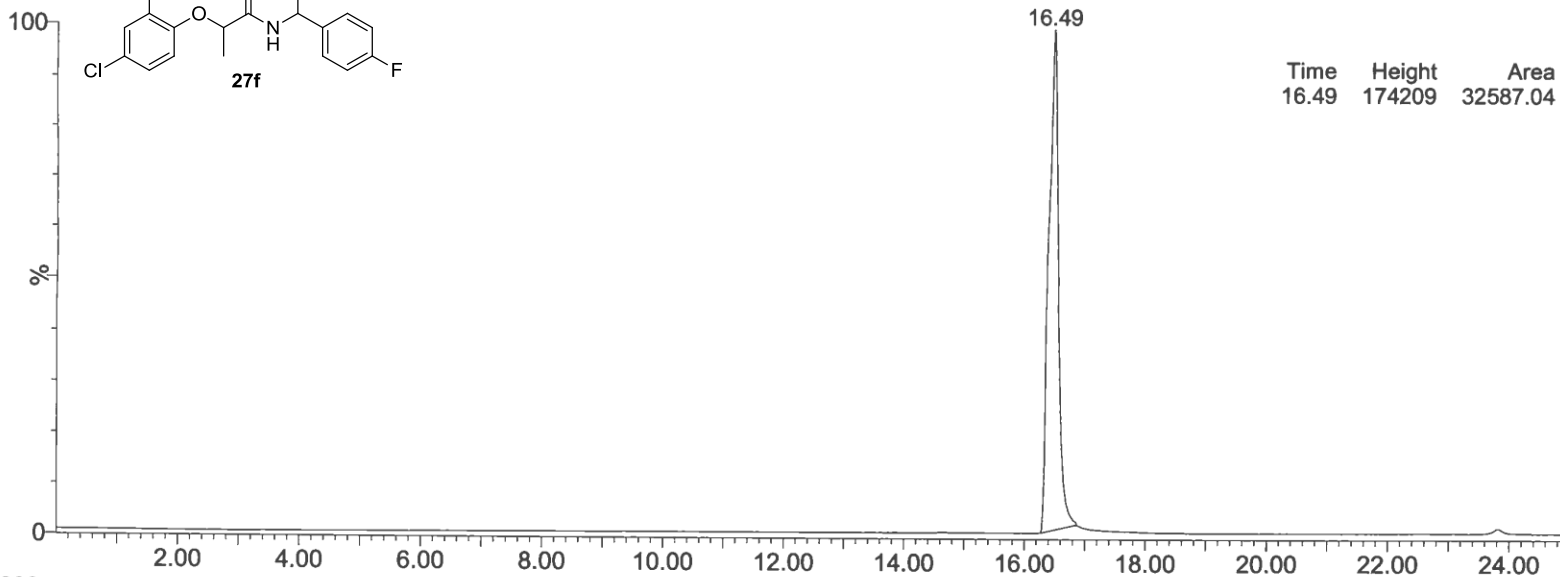

ELSD  
An2  
1.77e5

| Time  | Height | Area     | Area%  |
|-------|--------|----------|--------|
| 16.49 | 174209 | 32587.04 | 100.00 |

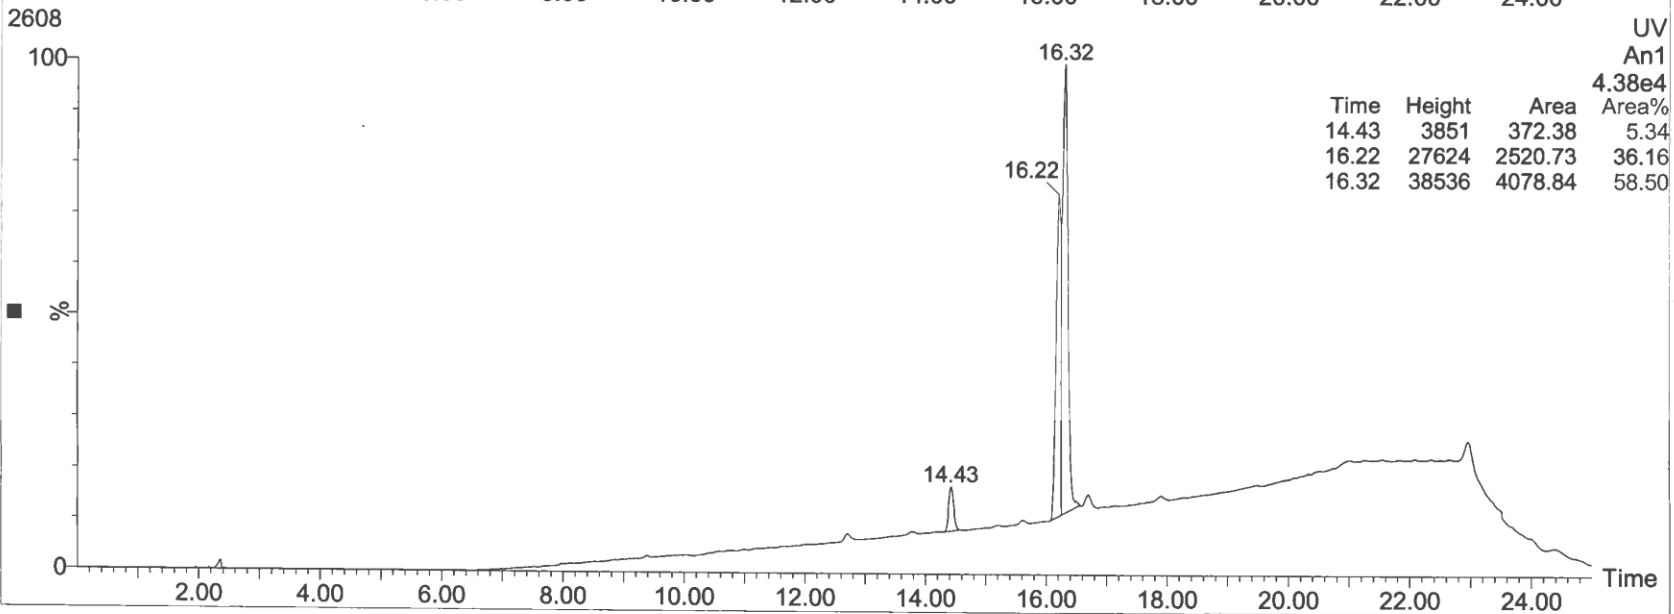

UV  
An1  
4.38e4

| Time  | Height | Area    | Area% |
|-------|--------|---------|-------|
| 14.43 | 3851   | 372.38  | 5.34  |
| 16.22 | 27624  | 2520.73 | 36.16 |
| 16.32 | 38536  | 4078.84 | 58.50 |

1: Scan ES+  
8.23e7

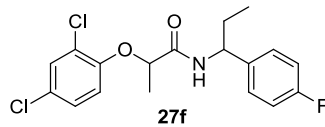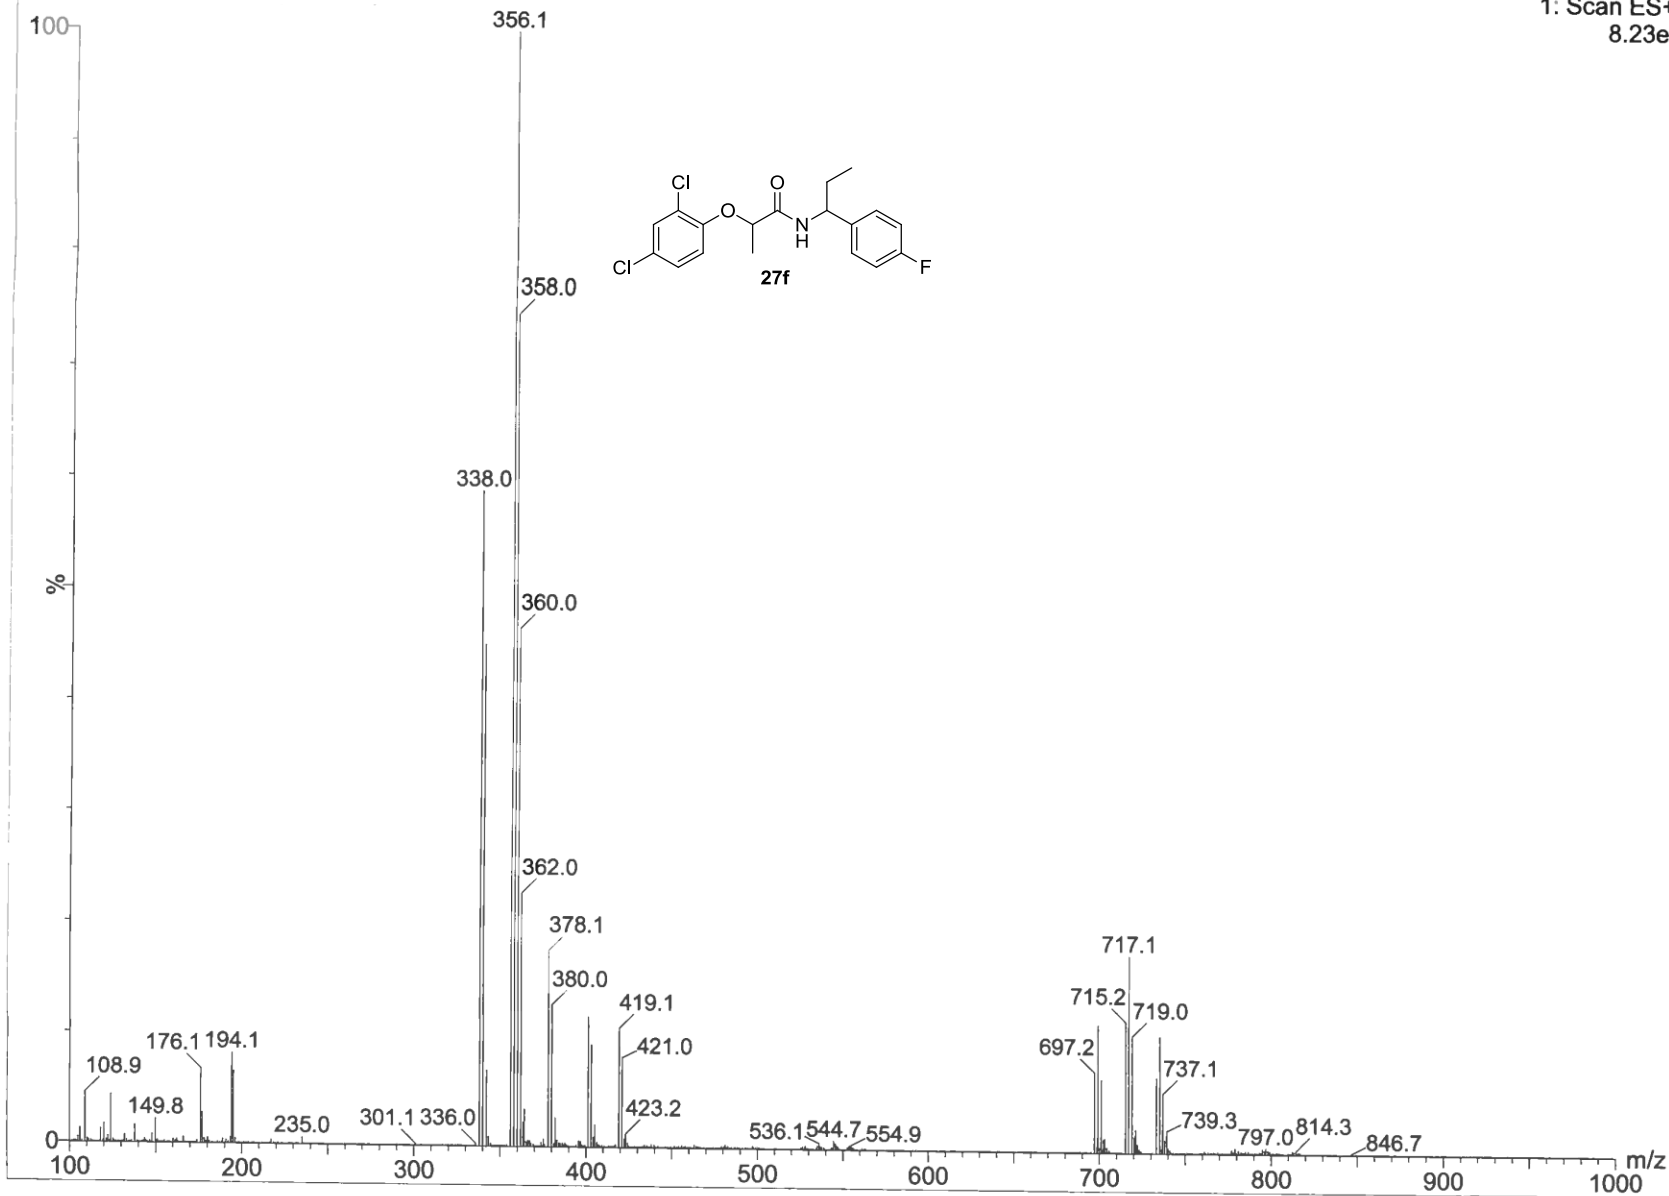

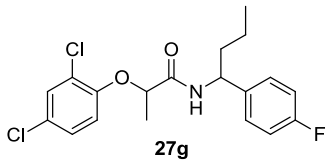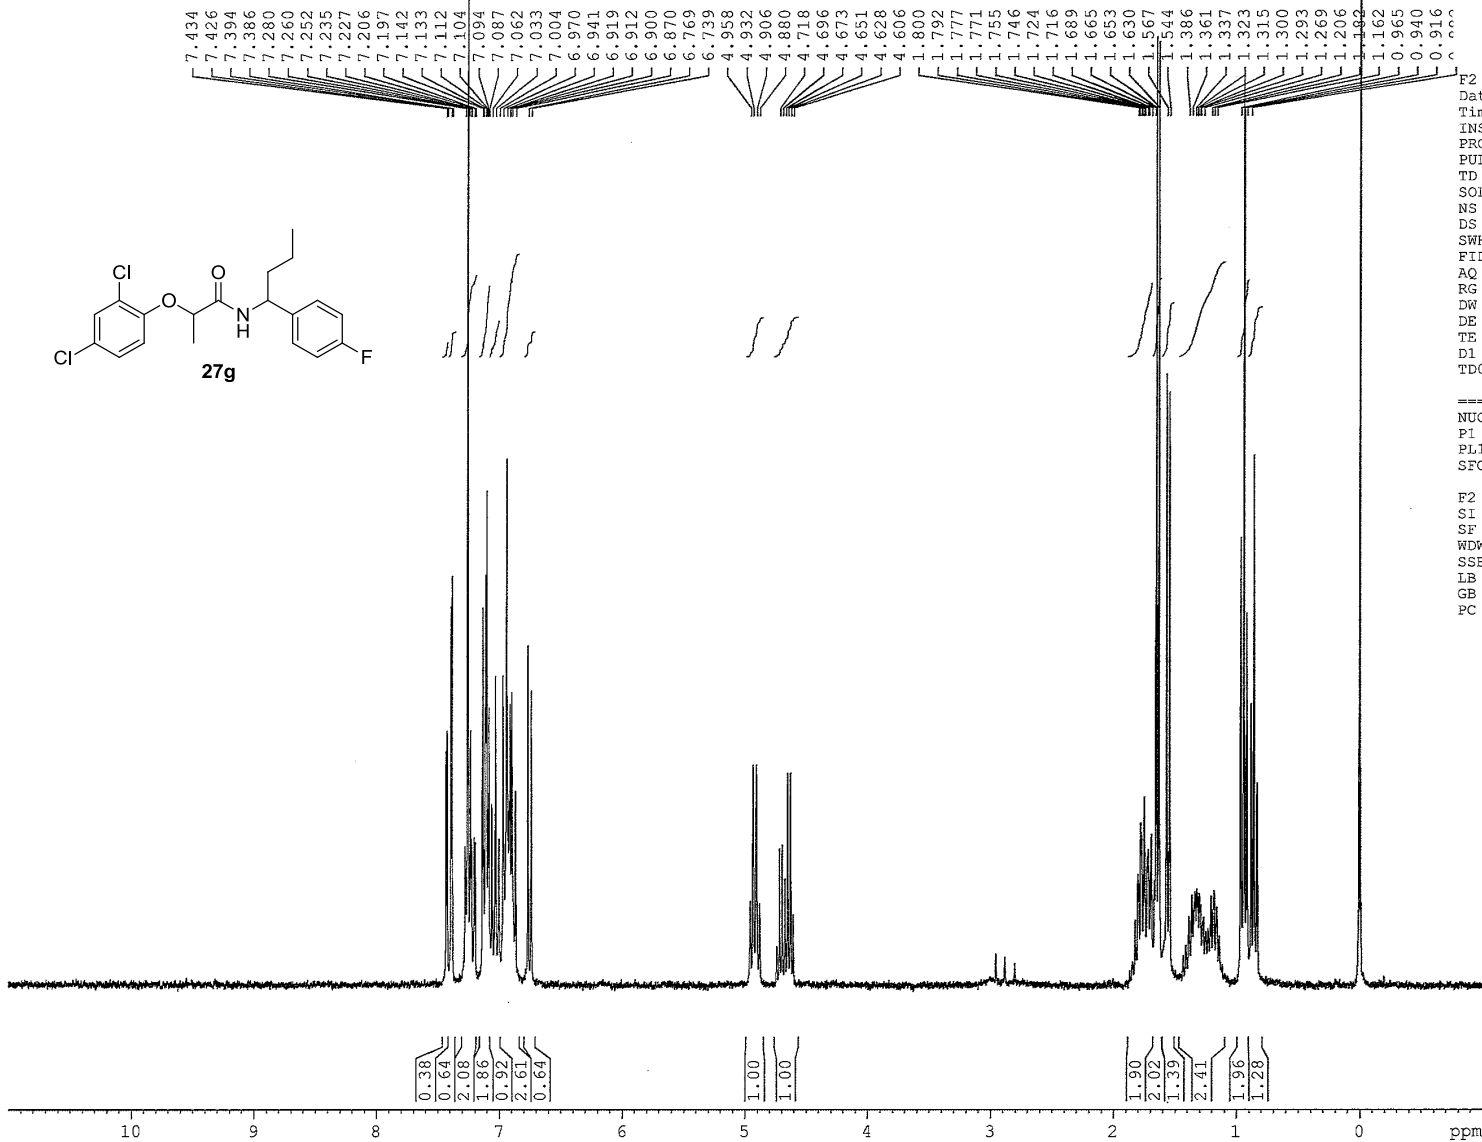

F2 - Acquisition Parameters  
 Date\_ 20120213  
 Time\_ 11.54  
 INSTRUM spect  
 PROBHD 5 mm BBO BB-1H  
 PULPROG zg30  
 TD 65536  
 SOLVENT CDCl3  
 NS 16  
 DS 2  
 SWH 6172.839 Hz  
 FIDRES 0.094190 Hz  
 AQ 5.3084660 sec  
 RG 2298.8  
 DW 81.000 usec  
 DE 6.50 usec  
 TE 298.2 K  
 D1 1.00000000 sec  
 TDO 1

==== CHANNEL f1 =====  
 NUC1 1H  
 P1 10.00 usec  
 PL1 9.20 dB  
 SFO1 299.5018495 MHz

F2 - Processing parameters  
 SI 32768  
 SF 299.5000058 MHz  
 WDW EM  
 SSB 0  
 LB 0.30 Hz  
 GB 0  
 PC 1.00

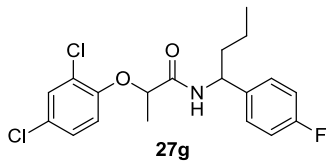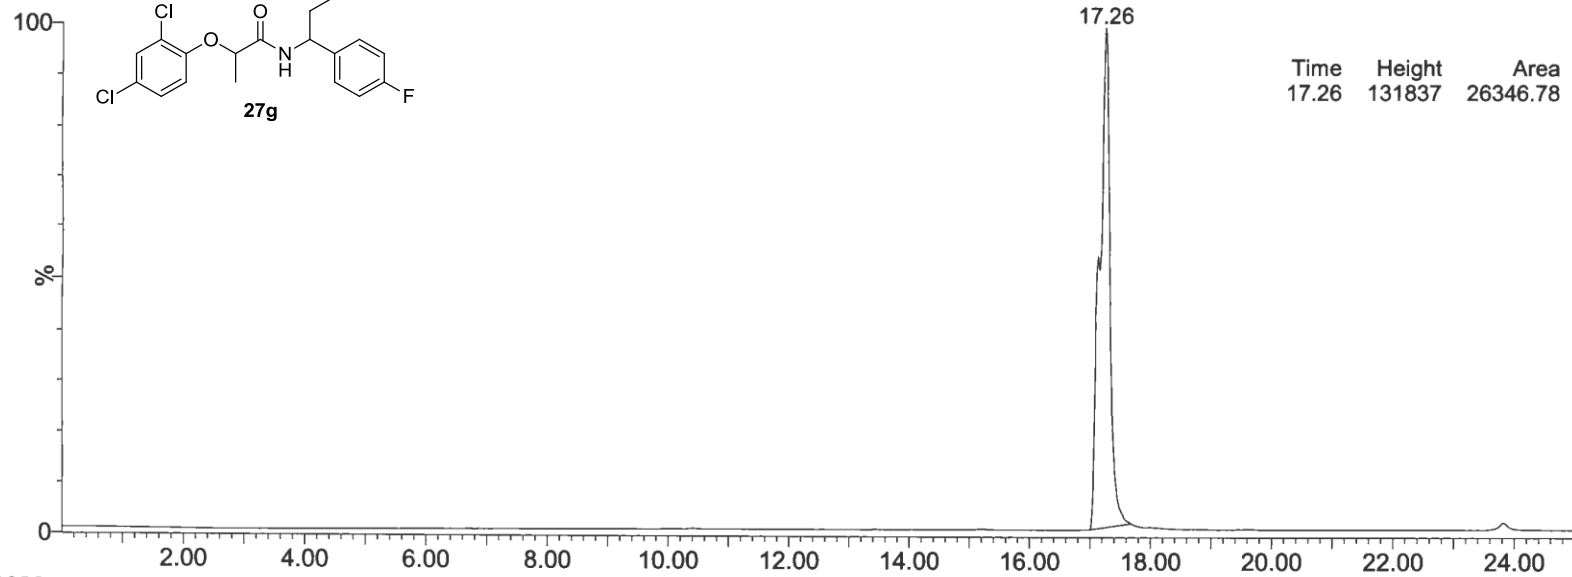

ELSD  
An2  
1.34e5

| Time  | Height | Area     | Area%  |
|-------|--------|----------|--------|
| 17.26 | 131837 | 26346.78 | 100.00 |

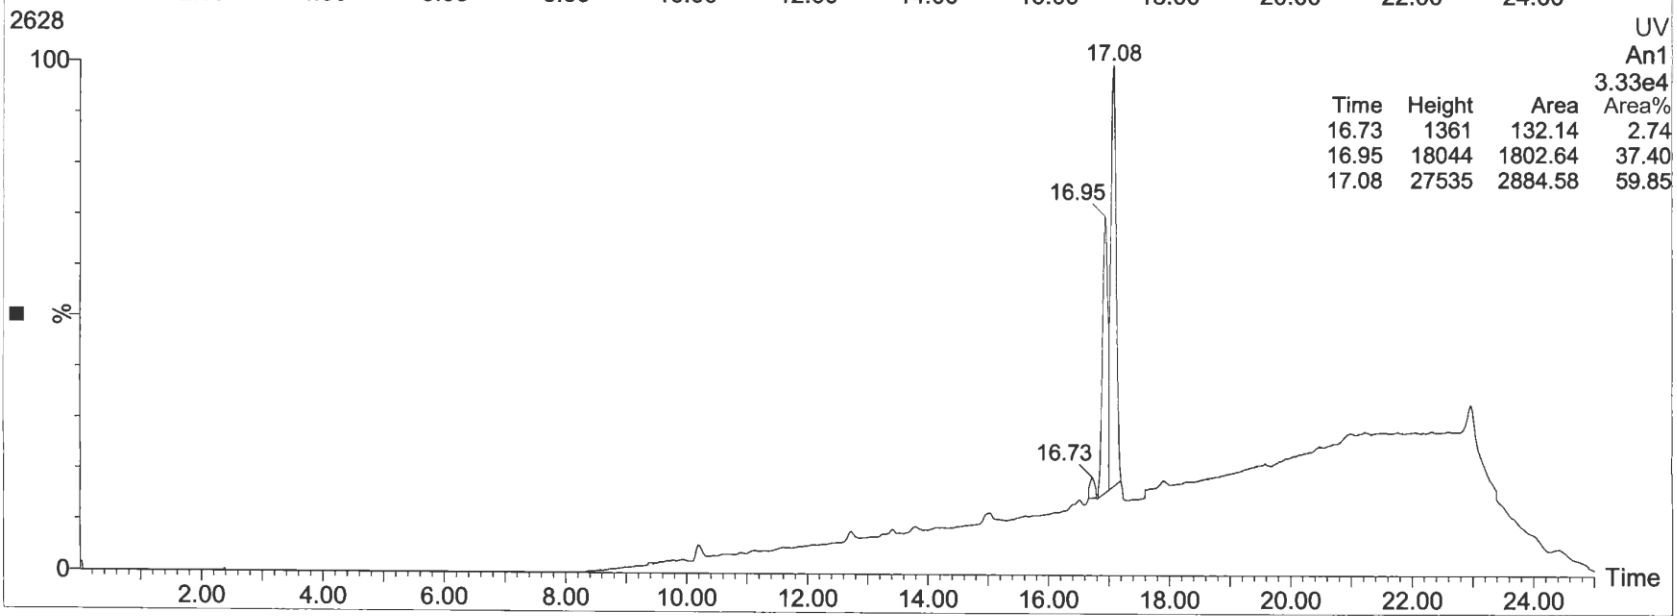

UV  
An1  
3.33e4

| Time  | Height | Area    | Area% |
|-------|--------|---------|-------|
| 16.73 | 1361   | 132.14  | 2.74  |
| 16.95 | 18044  | 1802.64 | 37.40 |
| 17.08 | 27535  | 2884.58 | 59.85 |

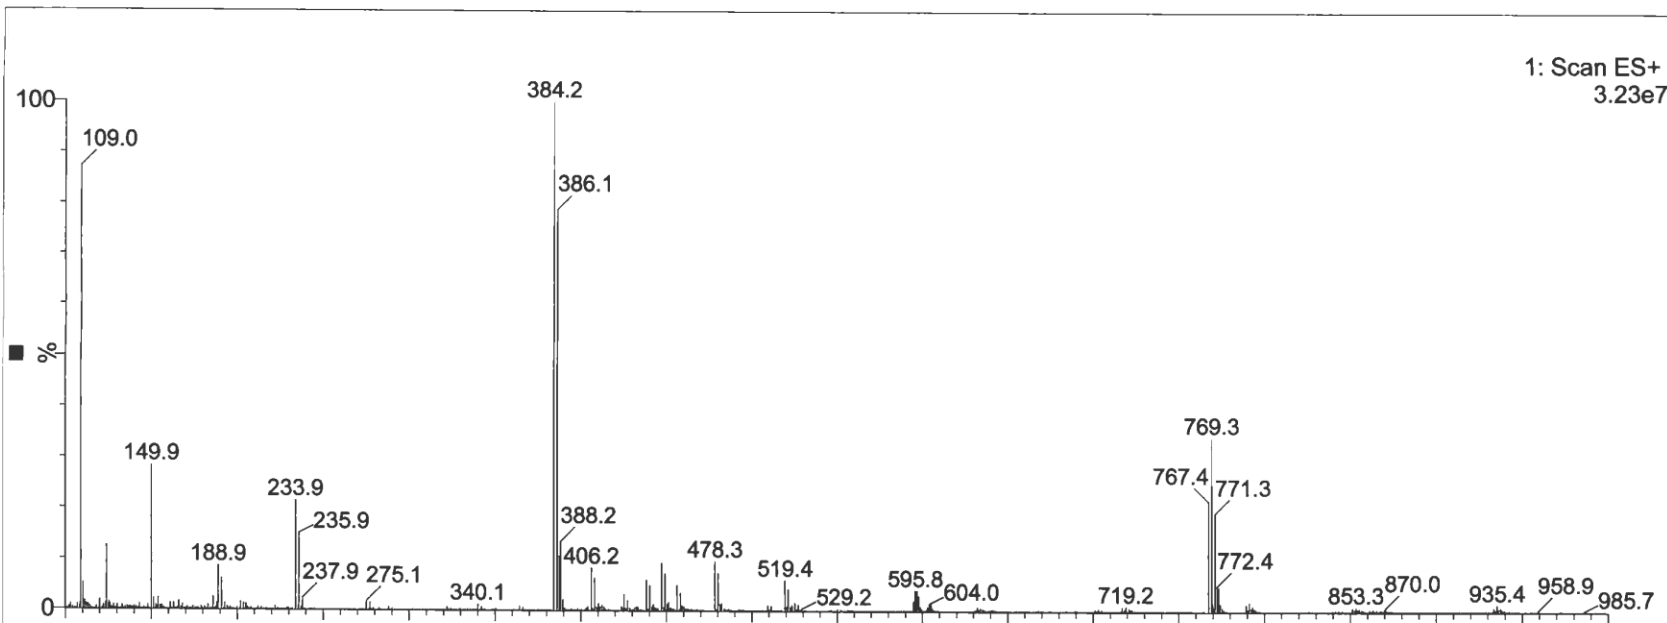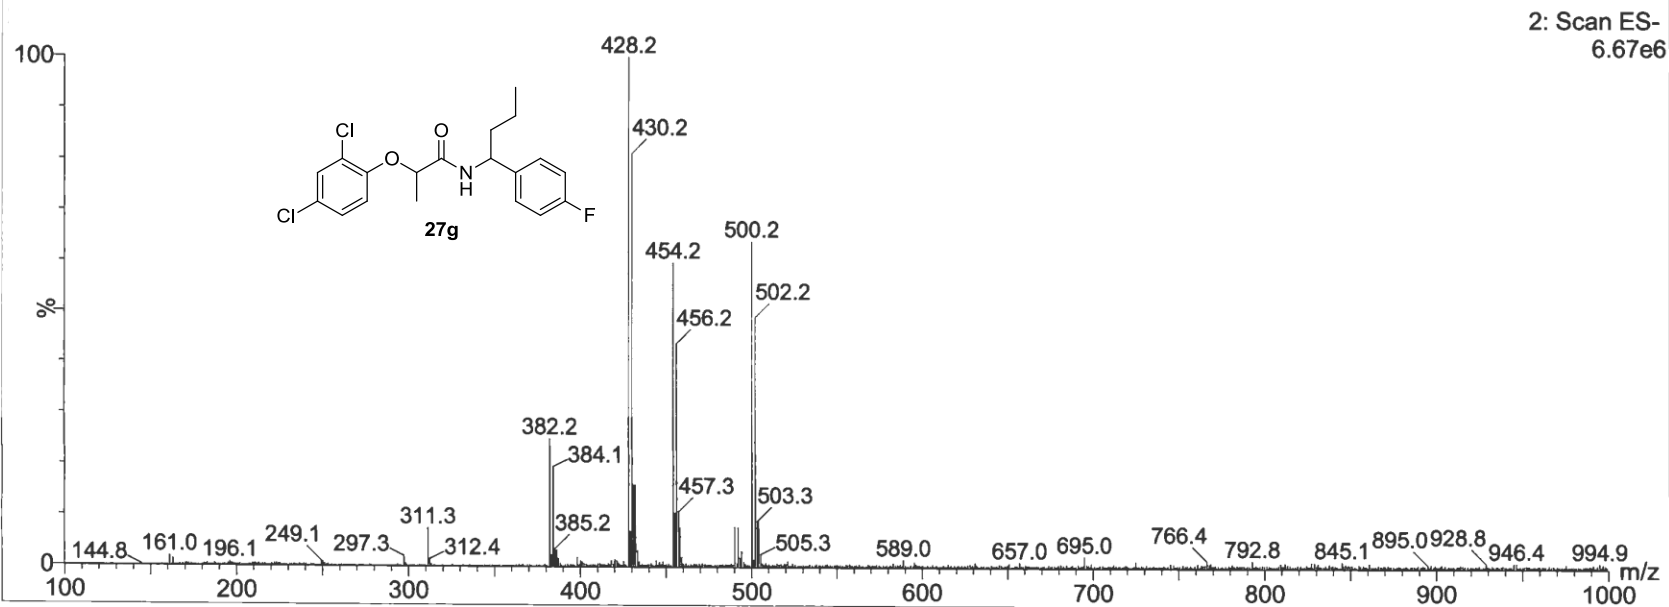

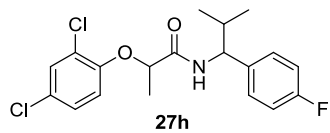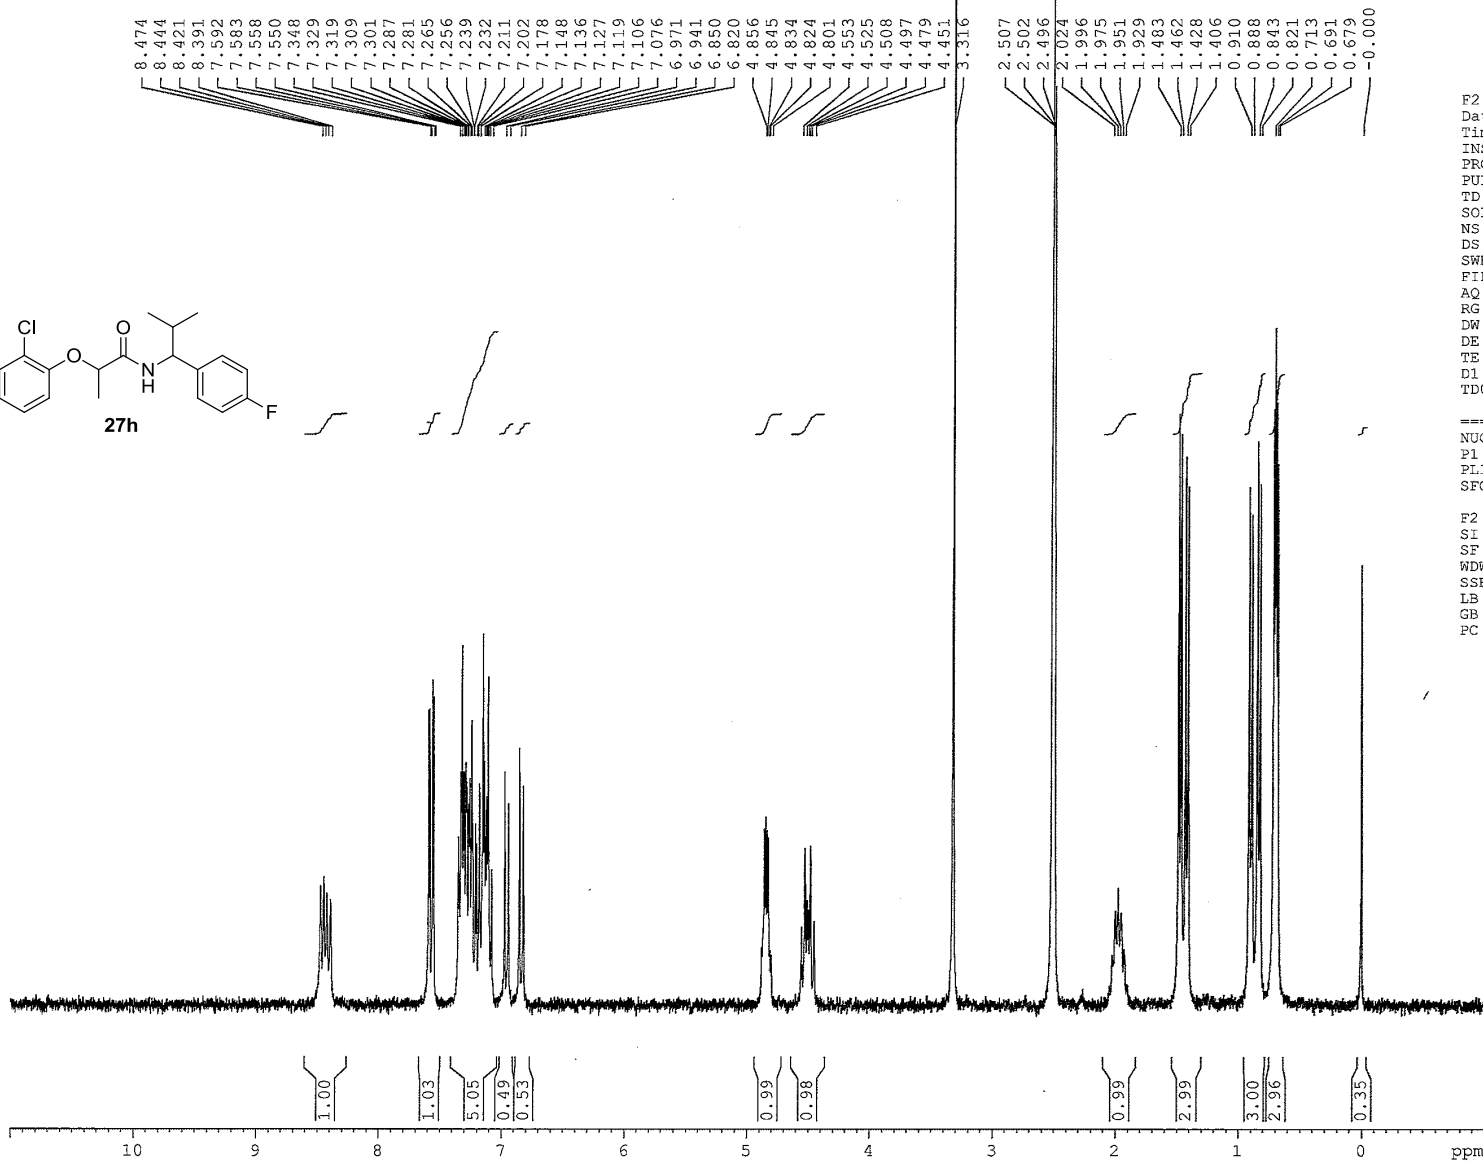

F2 - Acquisition Parameters  
 Date\_ 20120119  
 Time 14.29  
 INSTRUM spect  
 PROBHD 5 mm BBO BB-1H  
 PULPROG zg30  
 TD 65536  
 SOLVENT DMSO  
 NS 16  
 DS 2  
 SWH 6172.839 Hz  
 FIDRES 0.094190 Hz  
 AQ 5.3084660 sec  
 RG 2896.3  
 DW 81.000 usec  
 DE 6.50 usec  
 TE 298.2 K  
 D1 1.00000000 sec  
 TD0 1

===== CHANNEL f1 =====  
 NUC1 1H  
 P1 10.00 usec  
 PL1 9.20 dB  
 SFO1 299.5018495 MHz

F2 - Processing parameters  
 SI 32768  
 SF 299.5000001 MHz  
 WDW EM  
 SSB 0  
 LB 0.30 Hz  
 GB 0  
 PC 1.00



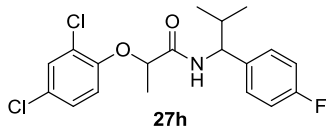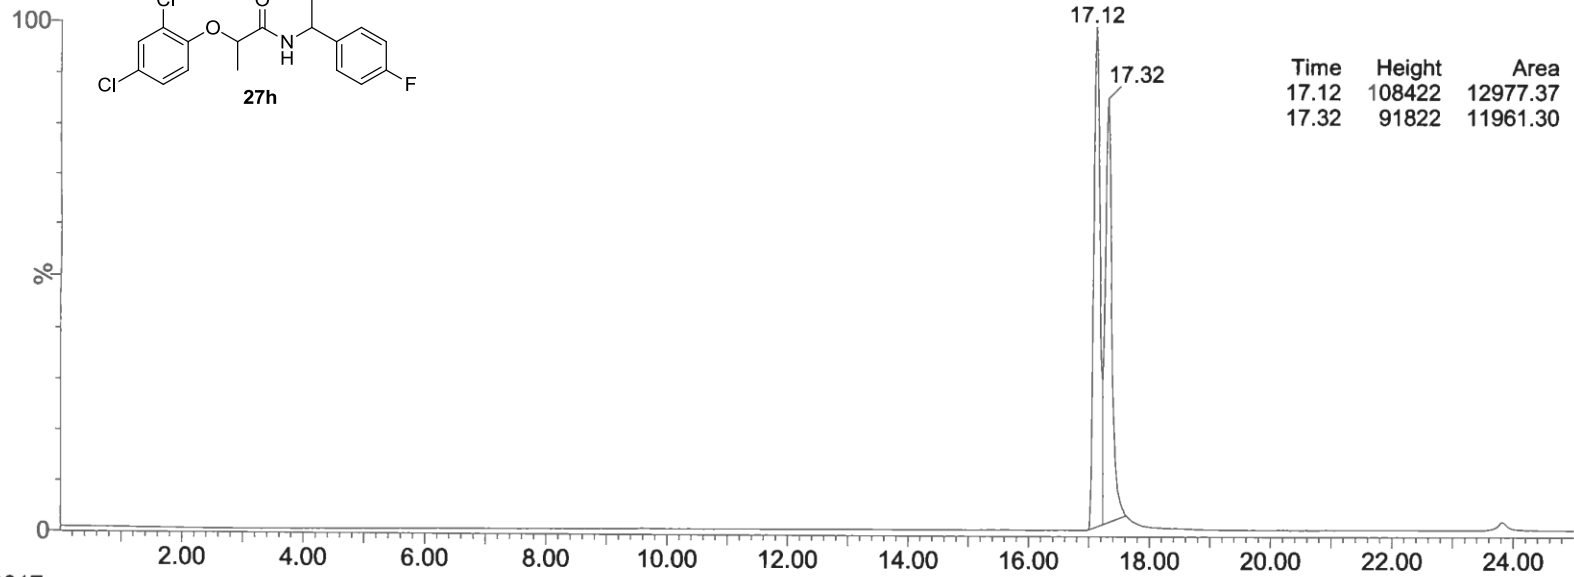

ELSD  
An2  
1.10e5

| Time  | Height | Area     | Area% |
|-------|--------|----------|-------|
| 17.12 | 108422 | 12977.37 | 52.04 |
| 17.32 | 91822  | 11961.30 | 47.96 |

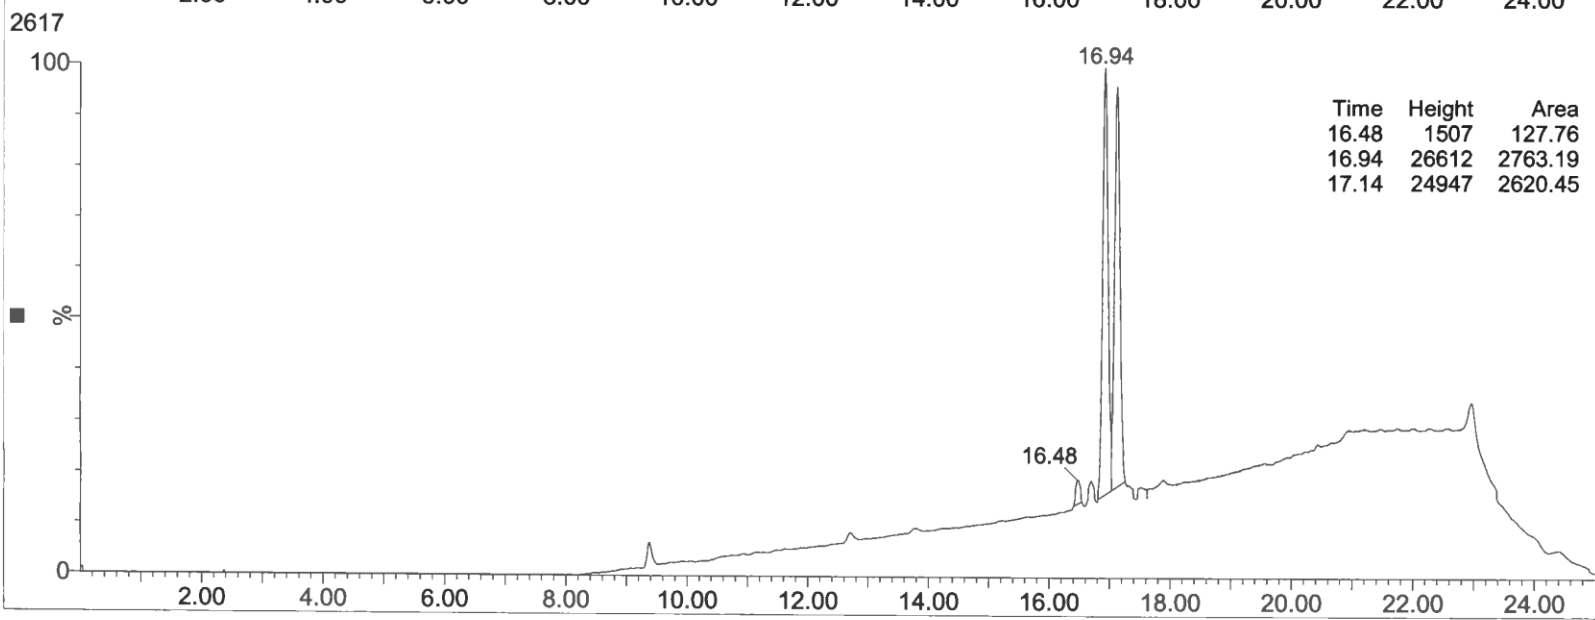

UV  
An1  
3.19e4

| Time  | Height | Area    | Area% |
|-------|--------|---------|-------|
| 16.48 | 1507   | 127.76  | 2.32  |
| 16.94 | 26612  | 2763.19 | 50.14 |
| 17.14 | 24947  | 2620.45 | 47.55 |

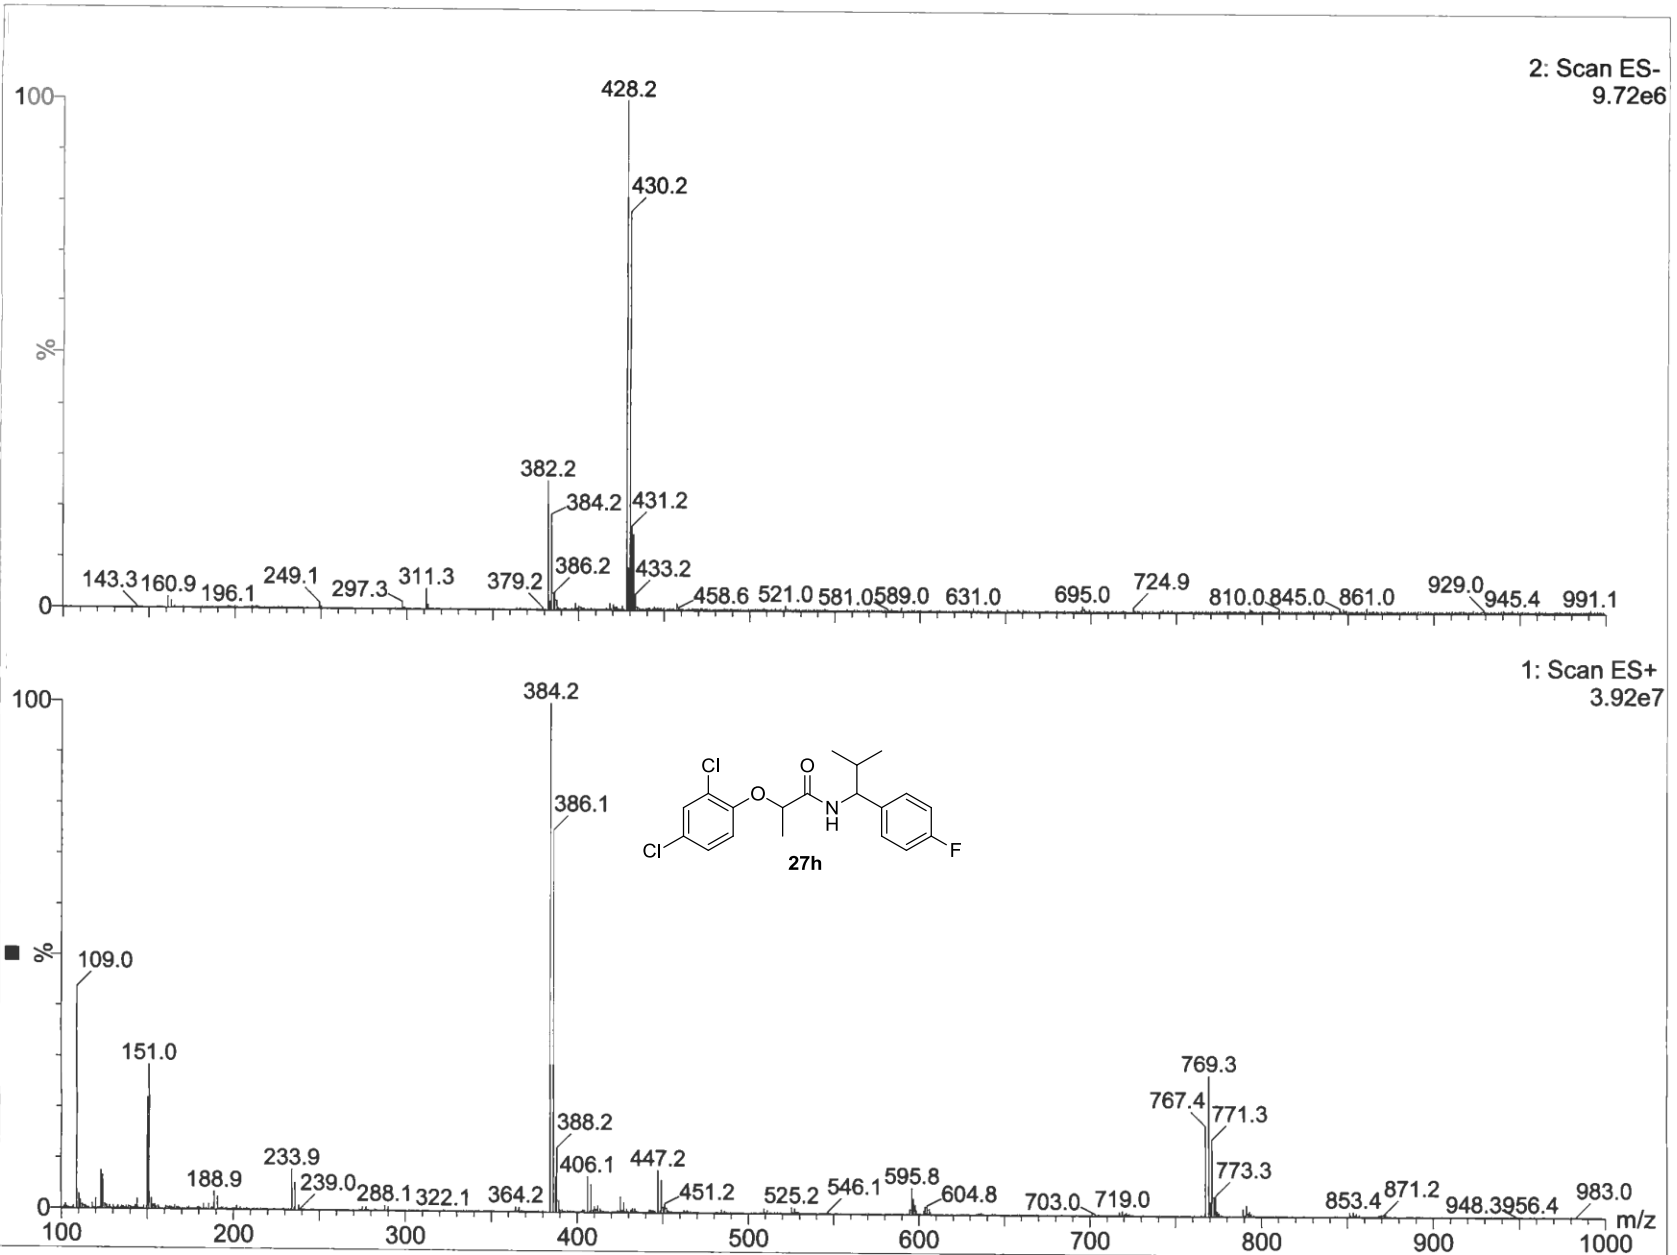

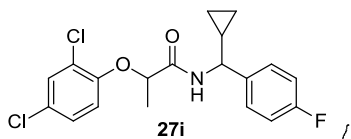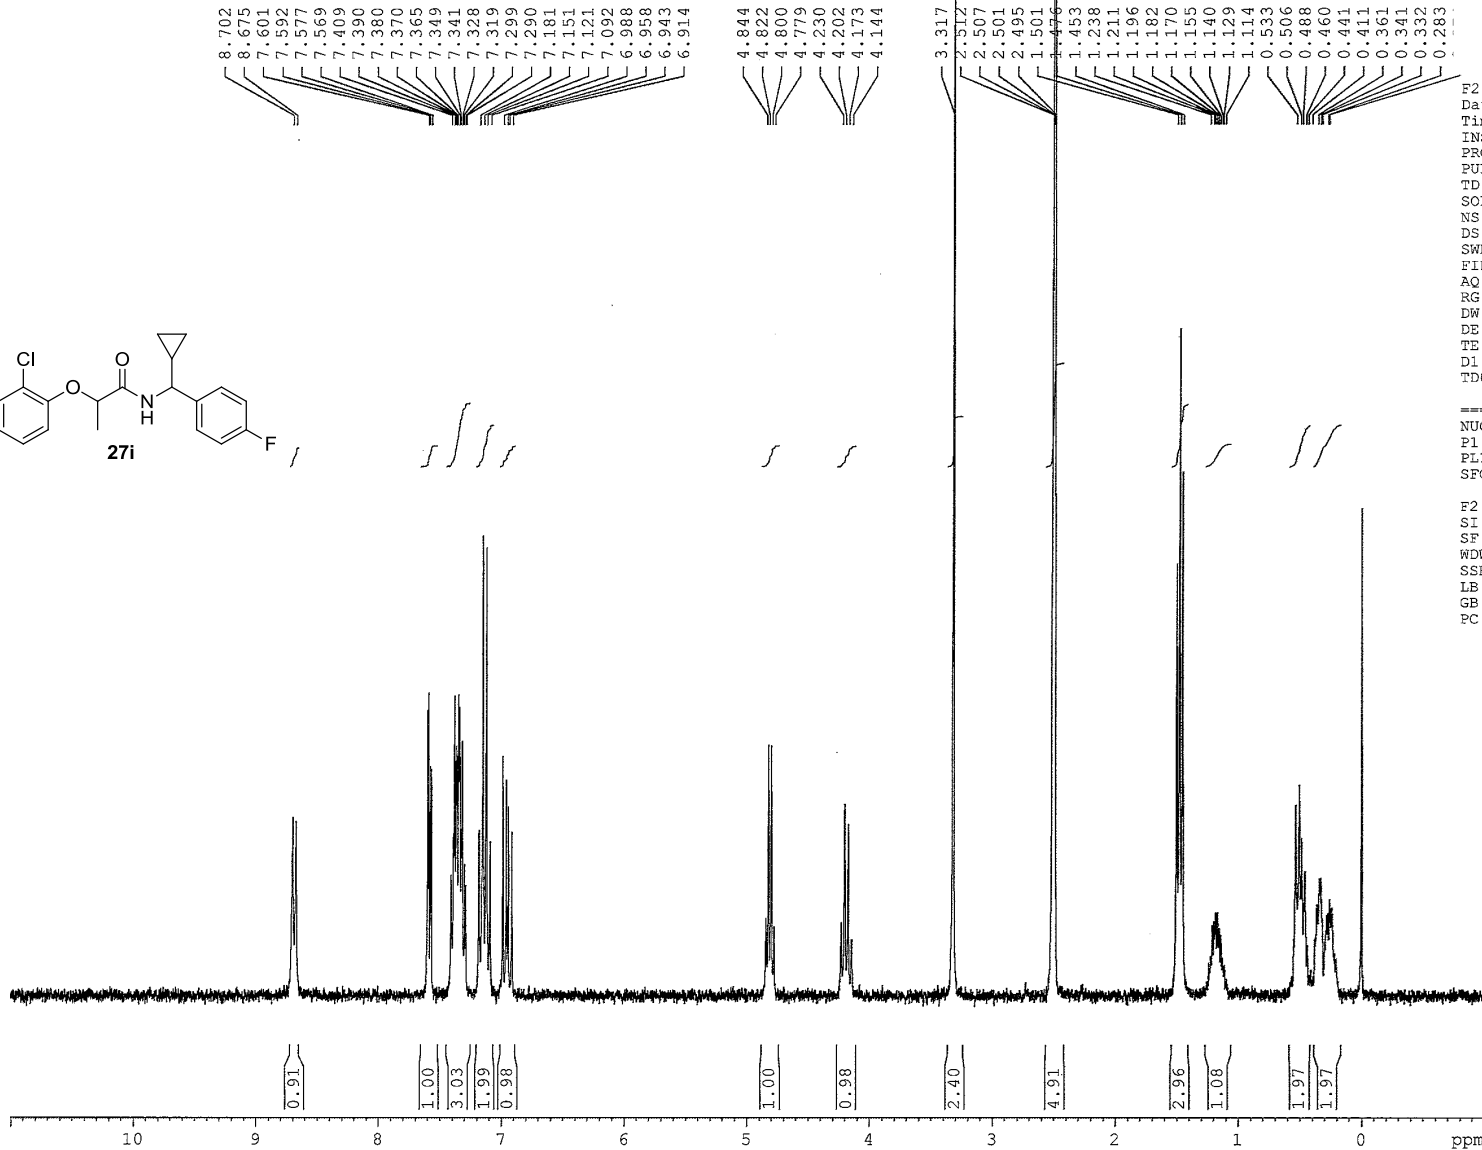

F2 - Acquisition Parameters  
 Date\_ 20120124  
 Time 10.24  
 INSTRUM spect  
 PROBED 5 mm BBO BB-1H  
 PULPROG zg30  
 TD 65536  
 SOLVENT DMSO  
 NS 16  
 DS 2  
 SWH 6172.839 Hz  
 FIDRES 0.094190 Hz  
 AQ 5.3084660 sec  
 RG 3649.1  
 DW 81.000 usec  
 DE 6.50 usec  
 TE 298.2 K  
 D1 1.00000000 sec  
 TD0 1

===== CHANNEL f1 =====  
 NUC1 1H  
 P1 10.00 usec  
 PL1 9.20 dB  
 SFO1 299.5018495 MHz

F2 - Processing parameters  
 SI 32768  
 SF 299.5000004 MHz  
 WDW EM  
 SSB 0  
 LB 0.30 Hz  
 GB 0  
 PC 1.00

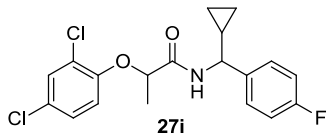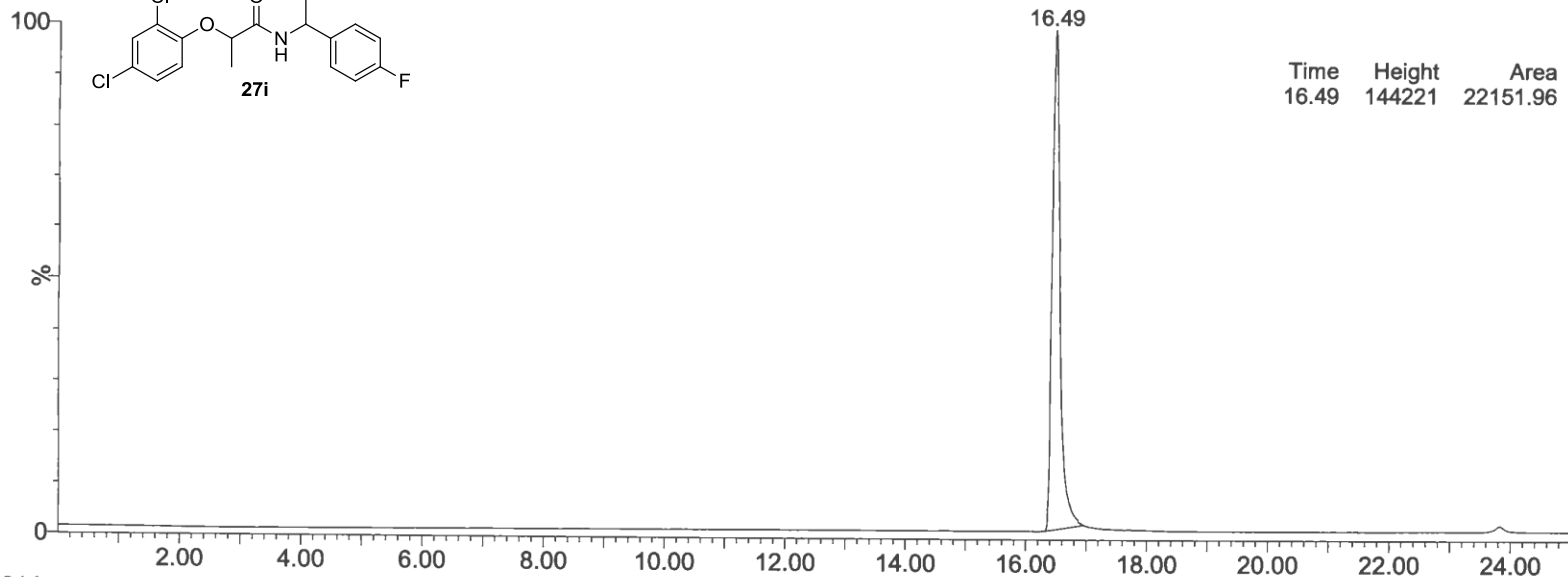

ELSD  
An2  
1.47e5  
Area%

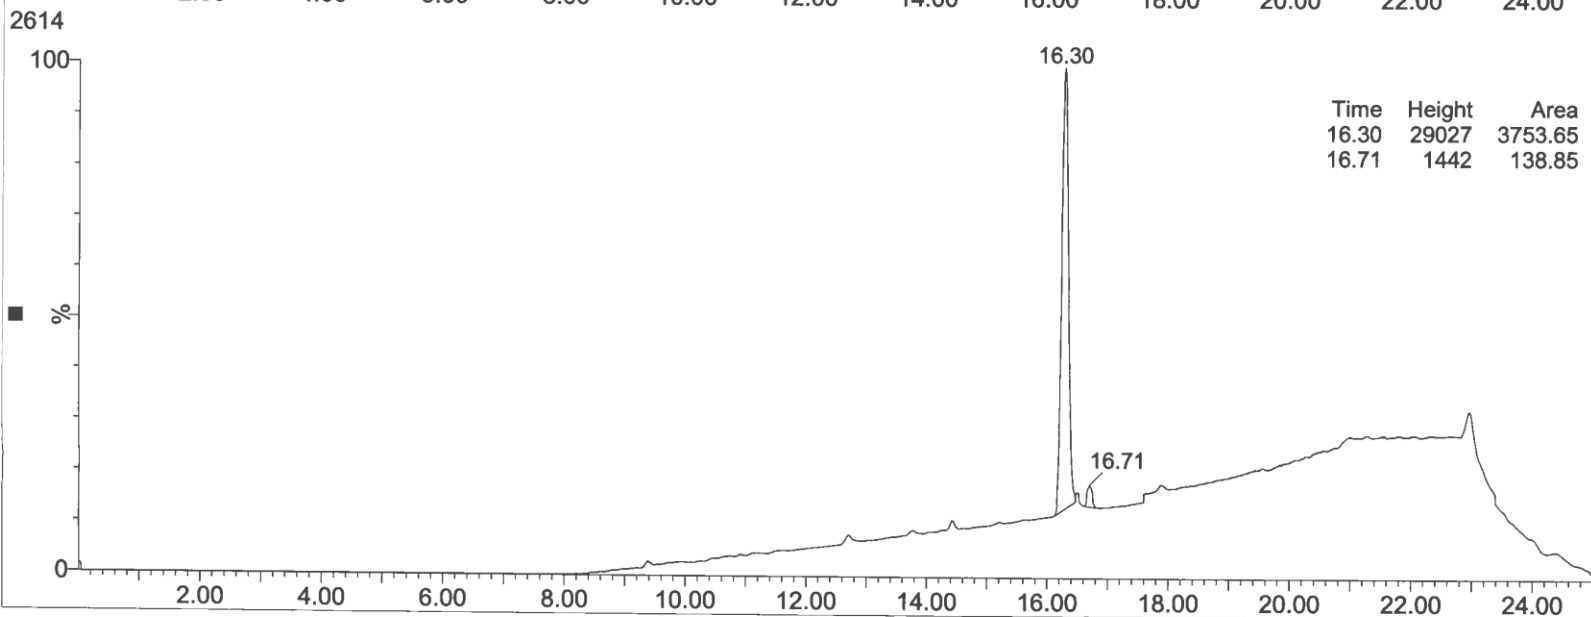

UV  
An1  
3.36e4  
Area%

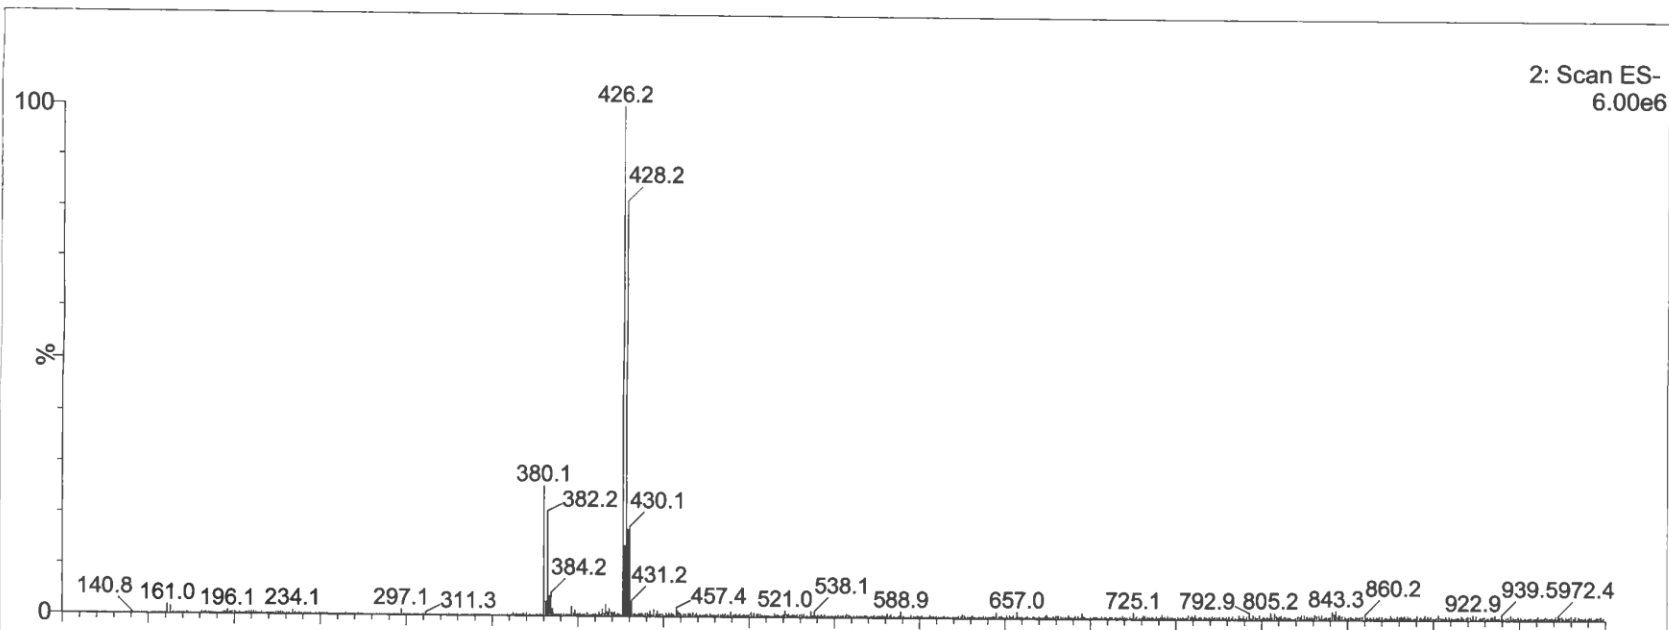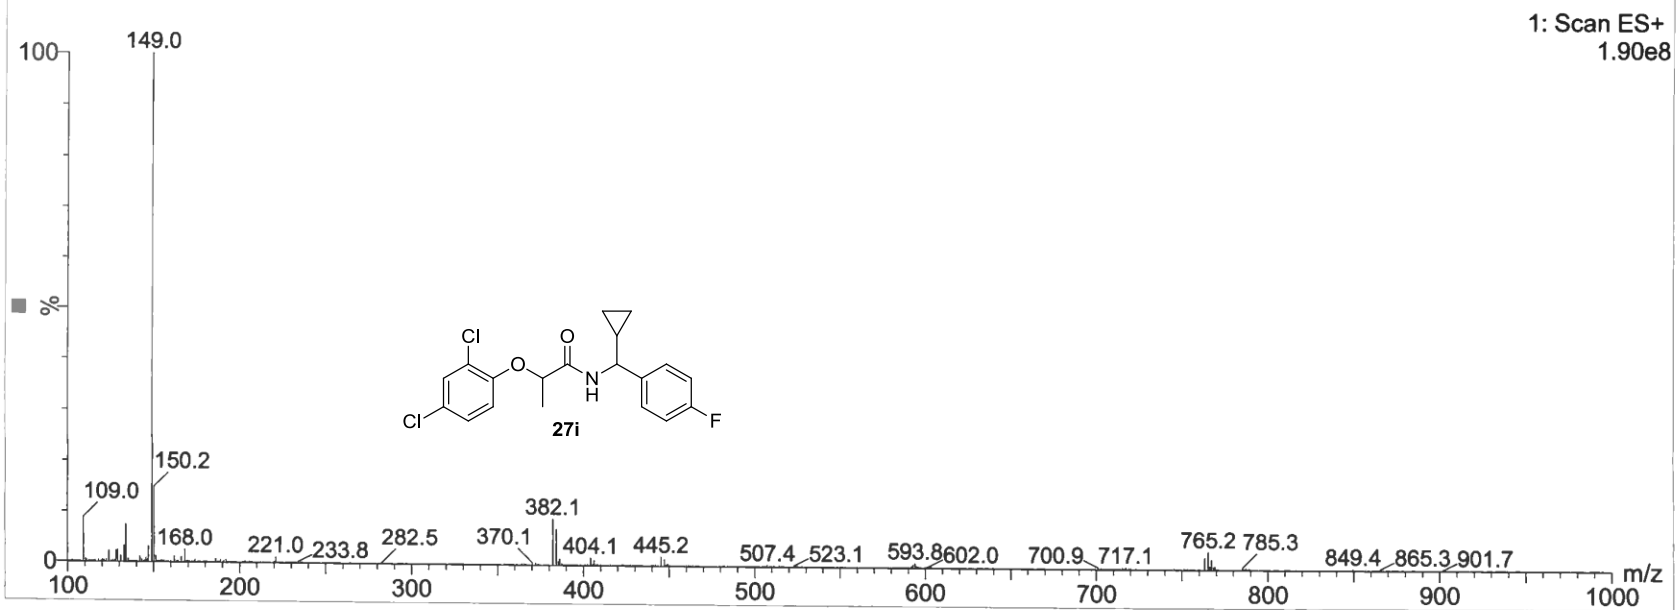

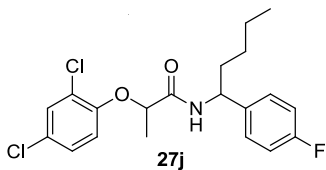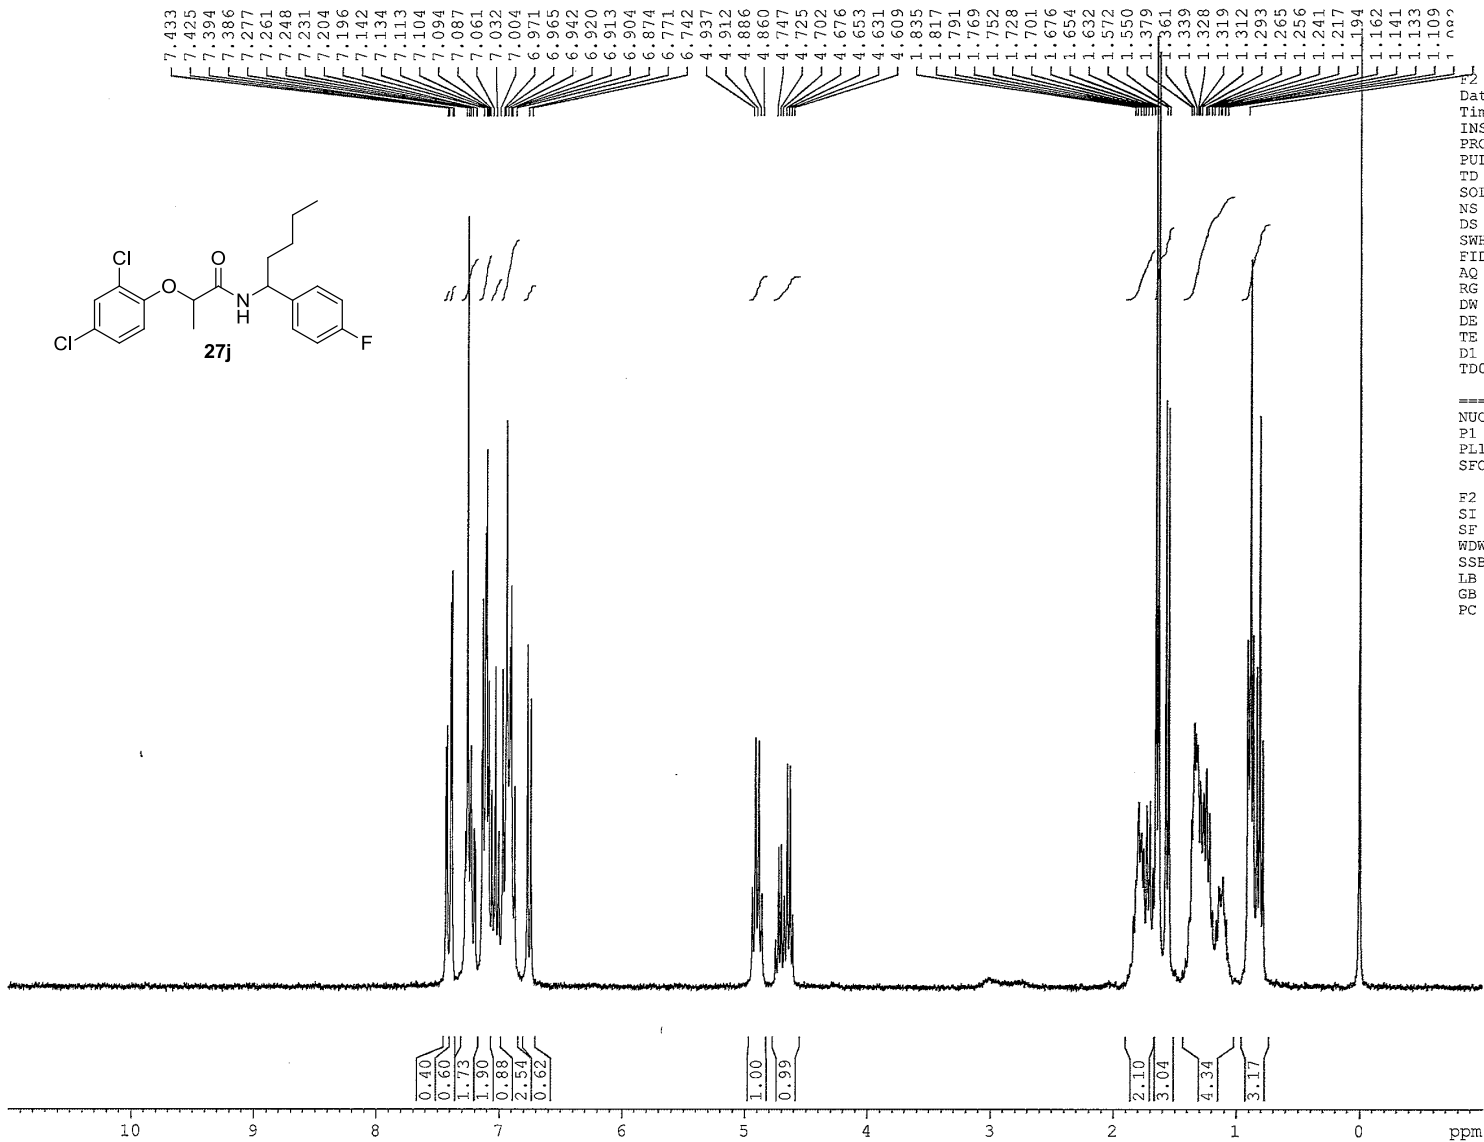

7.433  
7.425  
7.394  
7.386  
7.277  
7.261  
7.248  
7.231  
7.204  
7.196  
7.142  
7.134  
7.113  
7.104  
7.094  
7.087  
7.061  
7.032  
7.004  
6.971  
6.965  
6.942  
6.920  
6.913  
6.904  
6.874  
6.771  
6.742  
4.937  
4.912  
4.886  
4.860  
4.747  
4.725  
4.702  
4.676  
4.653  
4.631  
4.609  
1.835  
1.817  
1.791  
1.769  
1.752  
1.728  
1.701  
1.676  
1.654  
1.632  
1.572  
1.550  
1.379  
1.361  
1.339  
1.328  
1.319  
1.312  
1.293  
1.265  
1.256  
1.241  
1.217  
1.194  
1.162  
1.141  
1.133  
1.109  
1.092

F2 - Acquisition Parameters

Date\_ 20120213  
Time 12.06  
INSTRUM spect  
PROBHD 5 mm BBO BB-1H  
PULPROG zg30  
TD 65536  
SOLVENT CDCl3  
NS 16  
DS 2  
SWH 6172.839 Hz  
FIDRES 0.094190 Hz  
AQ 5.3084660 sec  
RG 1290.2  
DW 81.000 usec  
DE 6.50 usec  
TE 298.2 K  
D1 1.00000000 sec  
TDO 1

----- CHANNEL f1 -----

NUC1 1H  
P1 10.00 usec  
PL1 9.20 dB  
SFO1 299.5018495 MHz

F2 - Processing parameters

SI 32768  
SF 299.5000054 MHz  
WDW EM  
SSB 0  
LB 0.30 Hz  
GB 0  
PC 1.00

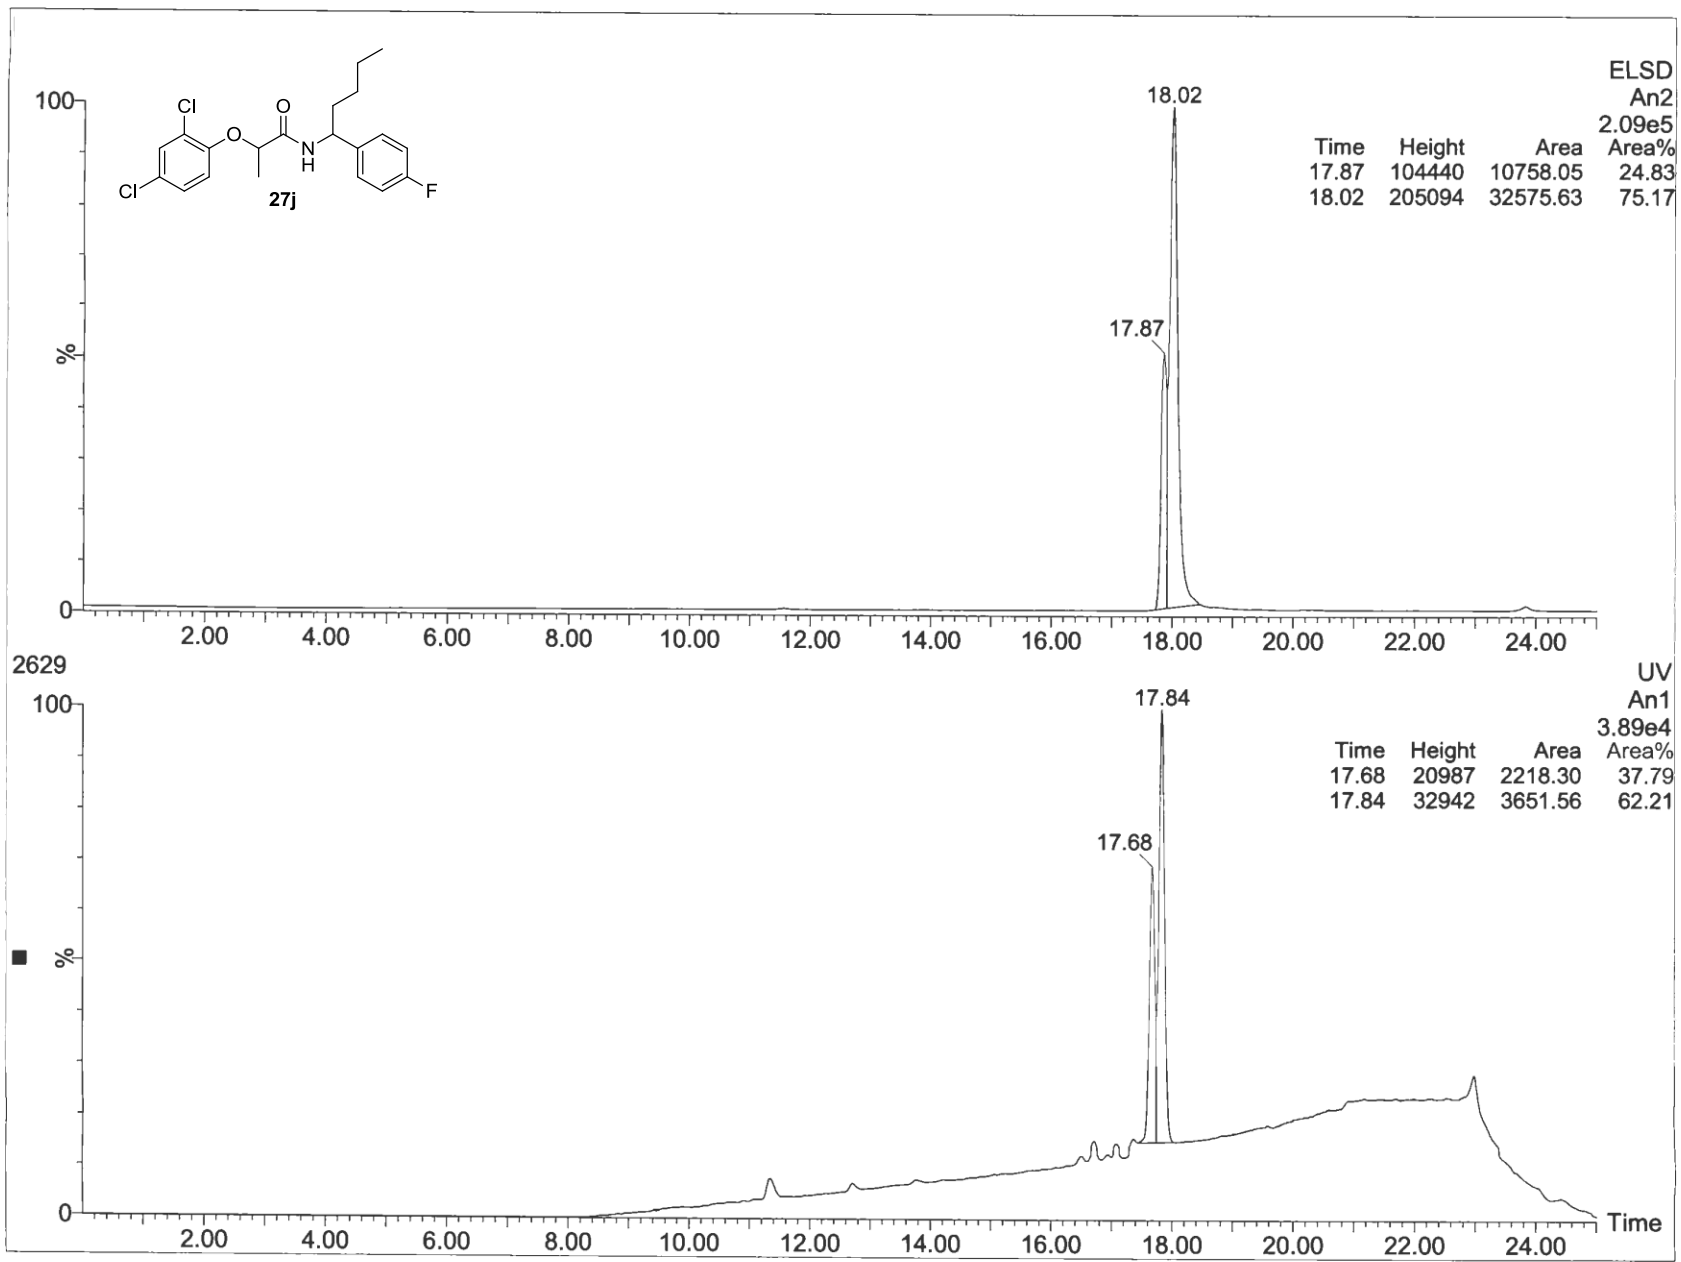

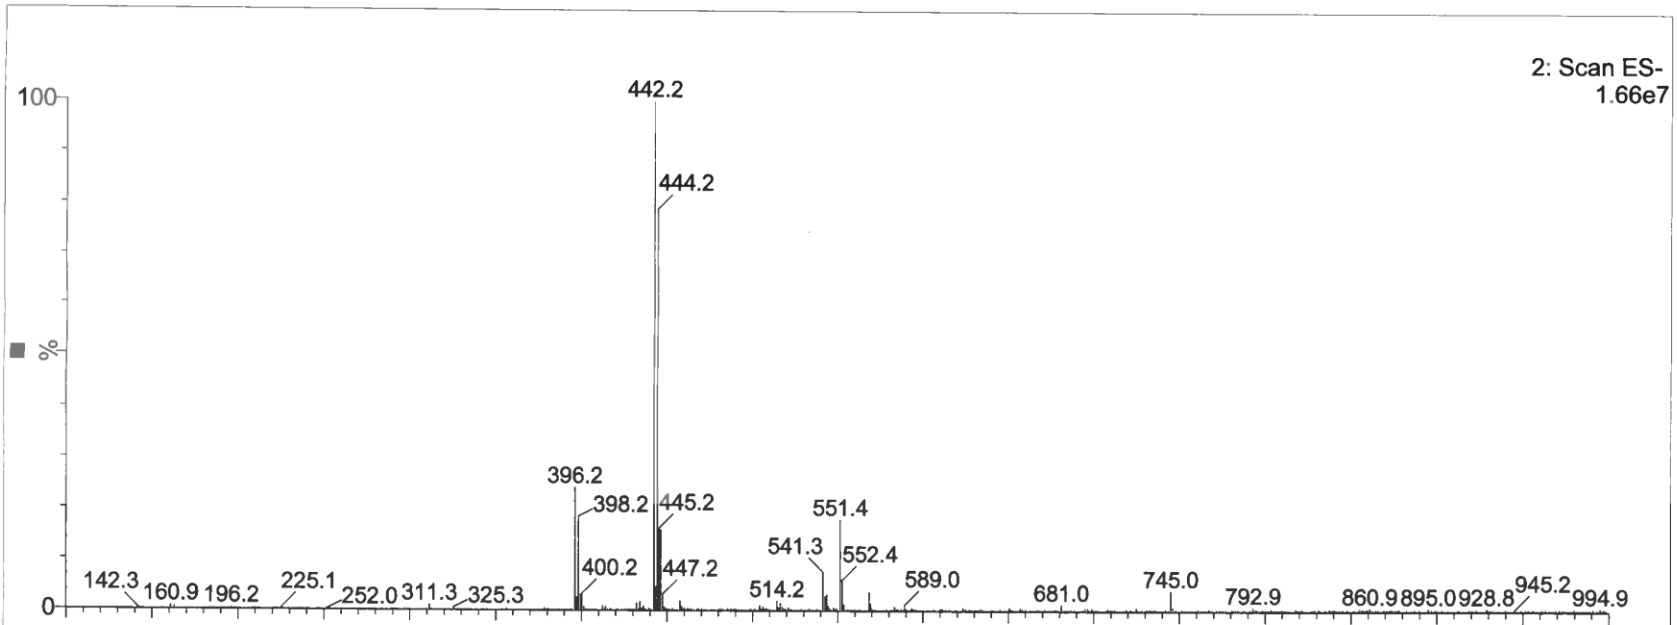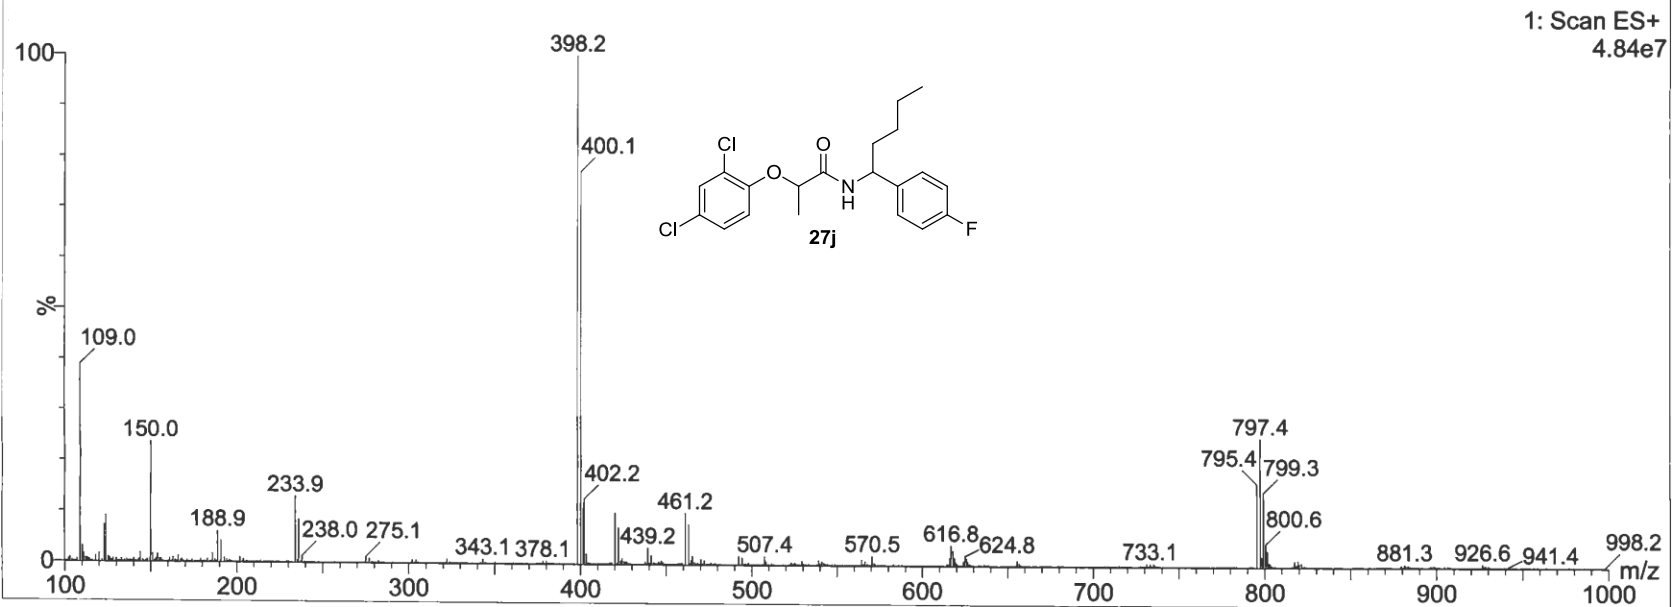



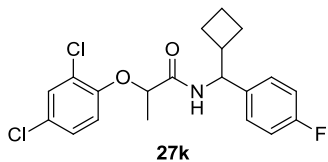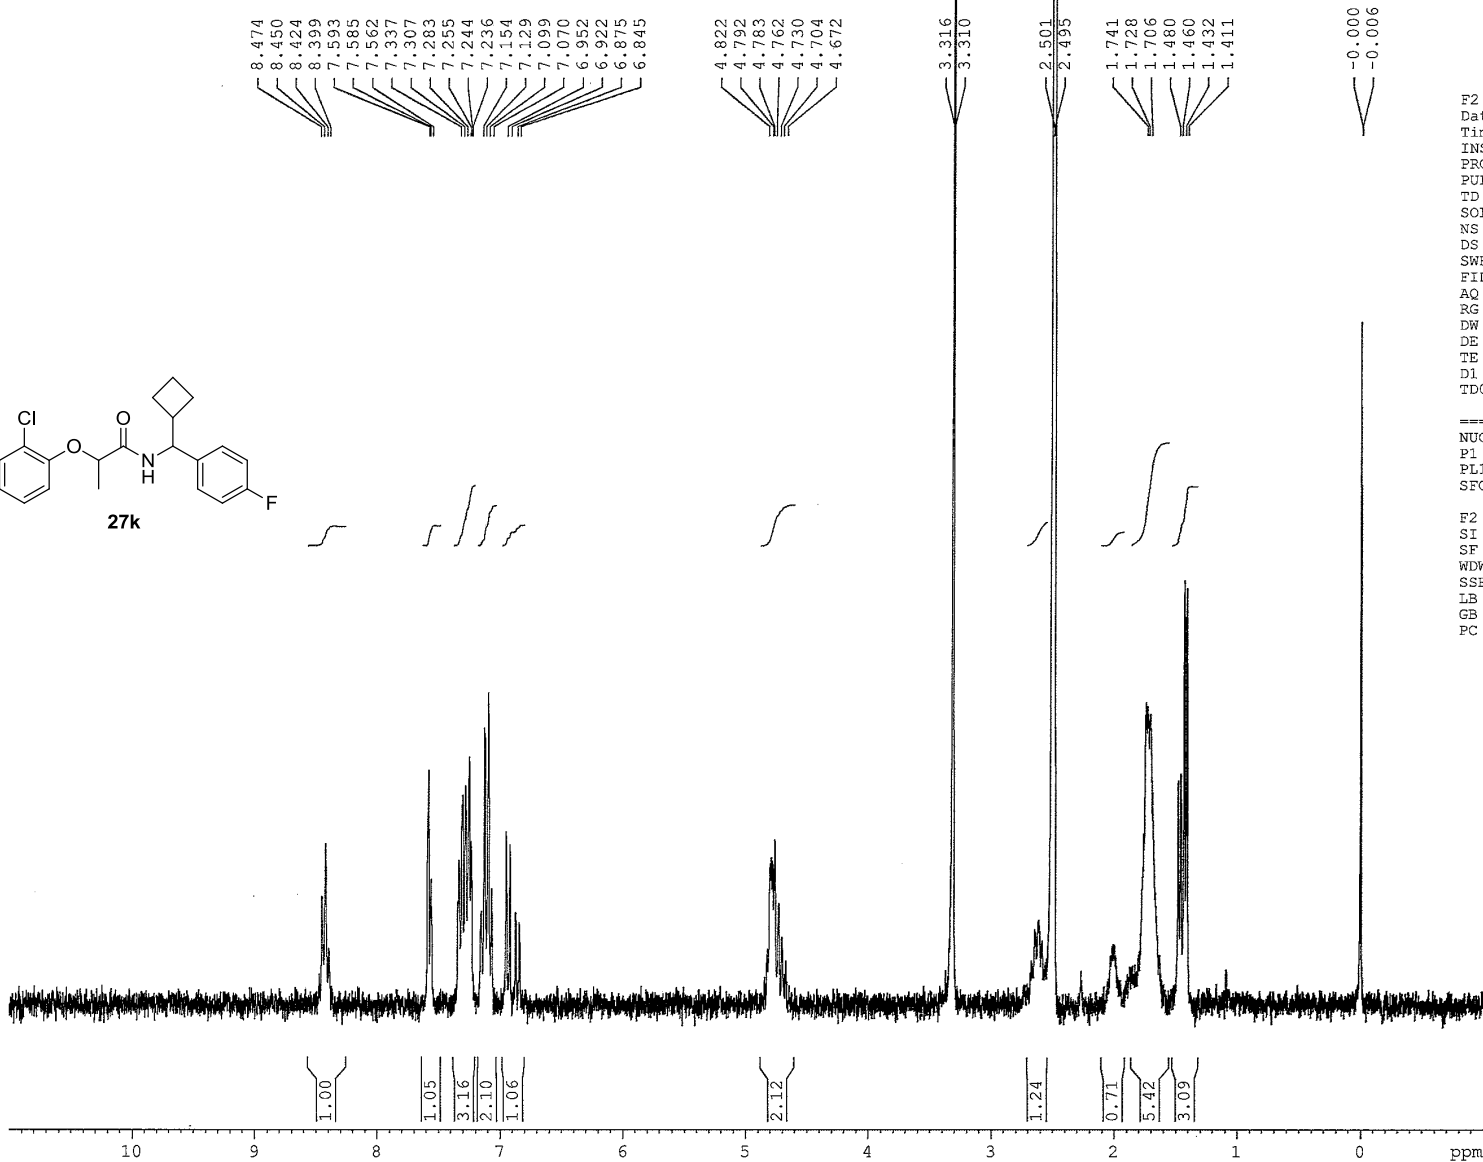

8.474  
8.450  
8.424  
8.399  
7.593  
7.585  
7.562  
7.337  
7.307  
7.283  
7.255  
7.244  
7.236  
7.154  
7.129  
7.099  
7.070  
6.952  
6.922  
6.875  
6.845

4.822  
4.792  
4.783  
4.762  
4.730  
4.704  
4.672

3.316  
3.310

2.501  
2.495

1.741  
1.728  
1.706  
1.480  
1.460  
1.432  
1.411

-0.000  
-0.006

F2 - Acquisition Parameters  
 Date\_ 20120124  
 Time 10.32  
 INSTRUM spect  
 PROBHD 5 mm BBO BB-1H  
 PULPROG zg30  
 TD 65536  
 SOLVENT DMSO  
 NS 16  
 DS 2  
 SWH 6172.839 Hz  
 FIDRES 0.094190 Hz  
 AQ 5.3084660 sec  
 RG 4597.6  
 DW 81.000 usec  
 DE 6.50 usec  
 TE 298.2 K  
 D1 1.00000000 sec  
 TDO 1

===== CHANNEL f1 =====  
 NUC1 1H  
 P1 10.00 usec  
 PL1 9.20 dB  
 SFO1 299.5018495 MHz

F2 - Processing parameters  
 SI 32768  
 SF 299.5000013 MHz  
 WDW EM  
 SSB 0  
 LB 0.30 Hz  
 GB 0  
 PC 1.00

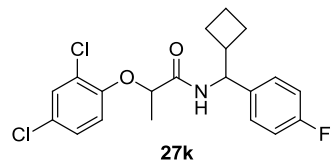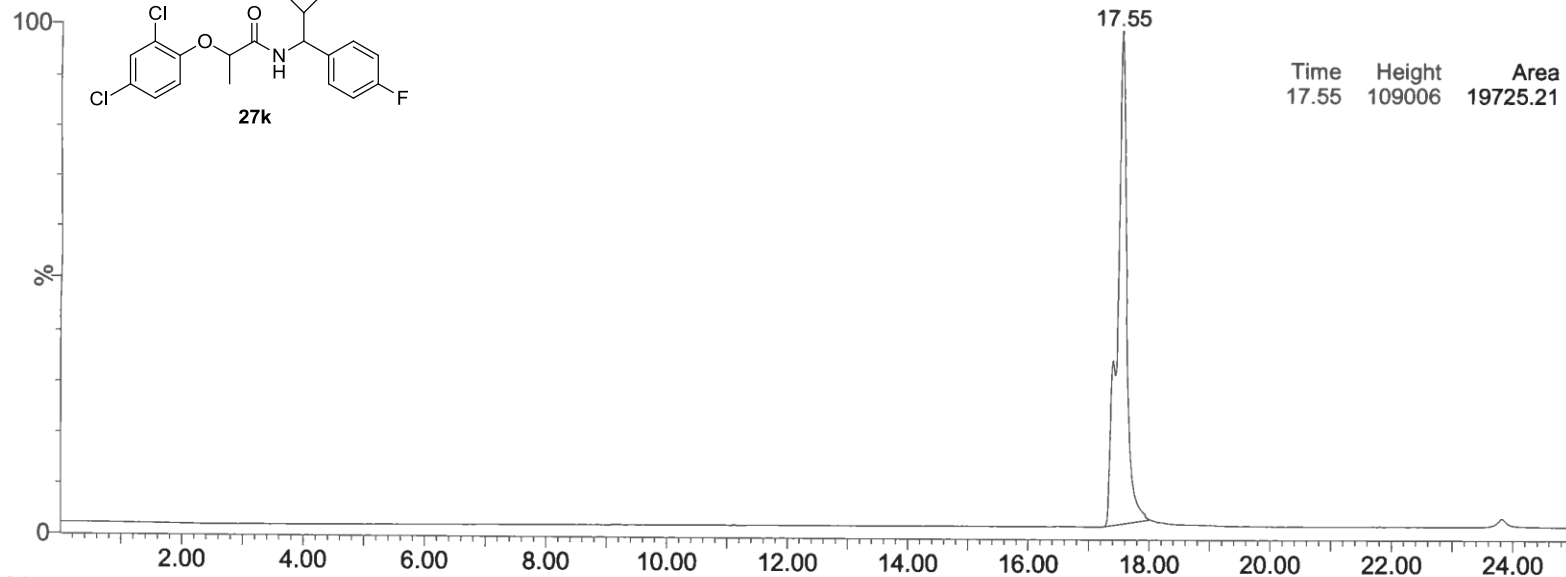

ELSD  
An2  
1.12e5

| Time  | Height | Area     | Area%  |
|-------|--------|----------|--------|
| 17.55 | 109006 | 19725.21 | 100.00 |

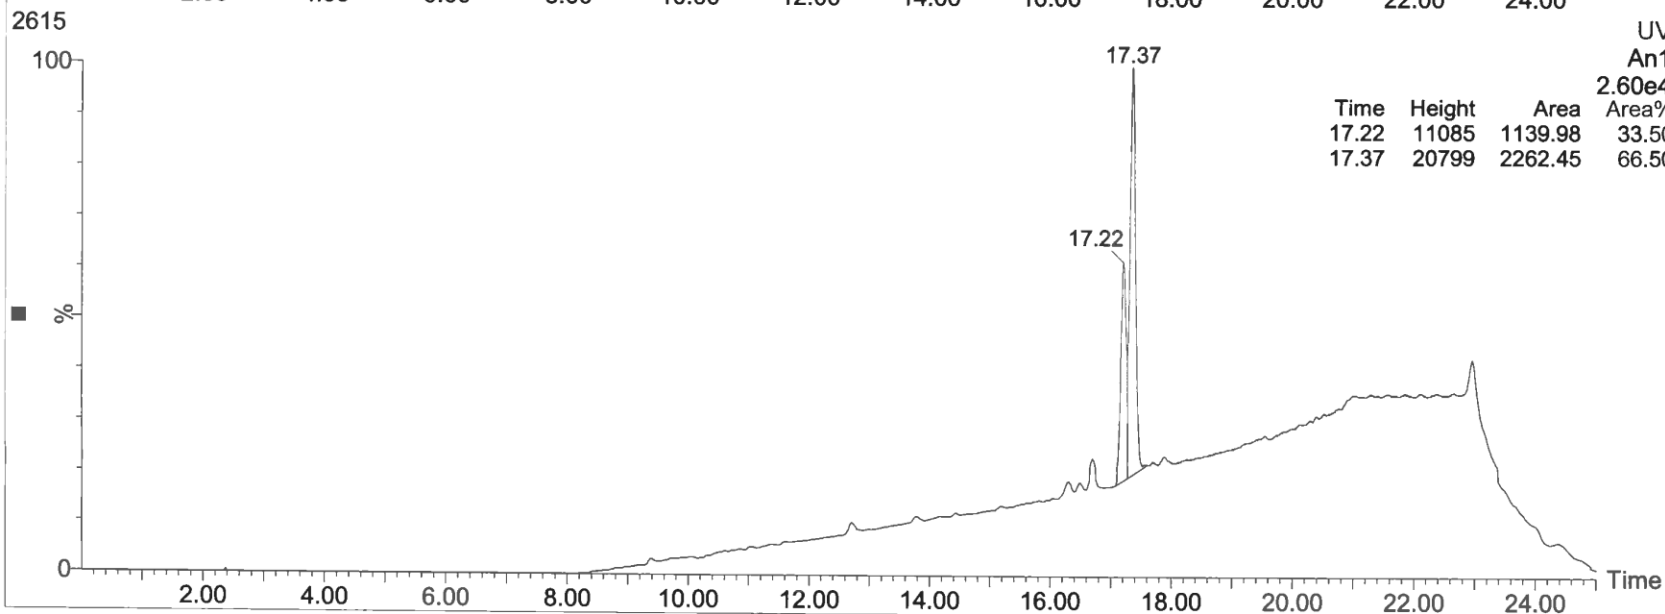

UV  
An1  
2.60e4

| Time  | Height | Area    | Area% |
|-------|--------|---------|-------|
| 17.22 | 11085  | 1139.98 | 33.50 |
| 17.37 | 20799  | 2262.45 | 66.50 |

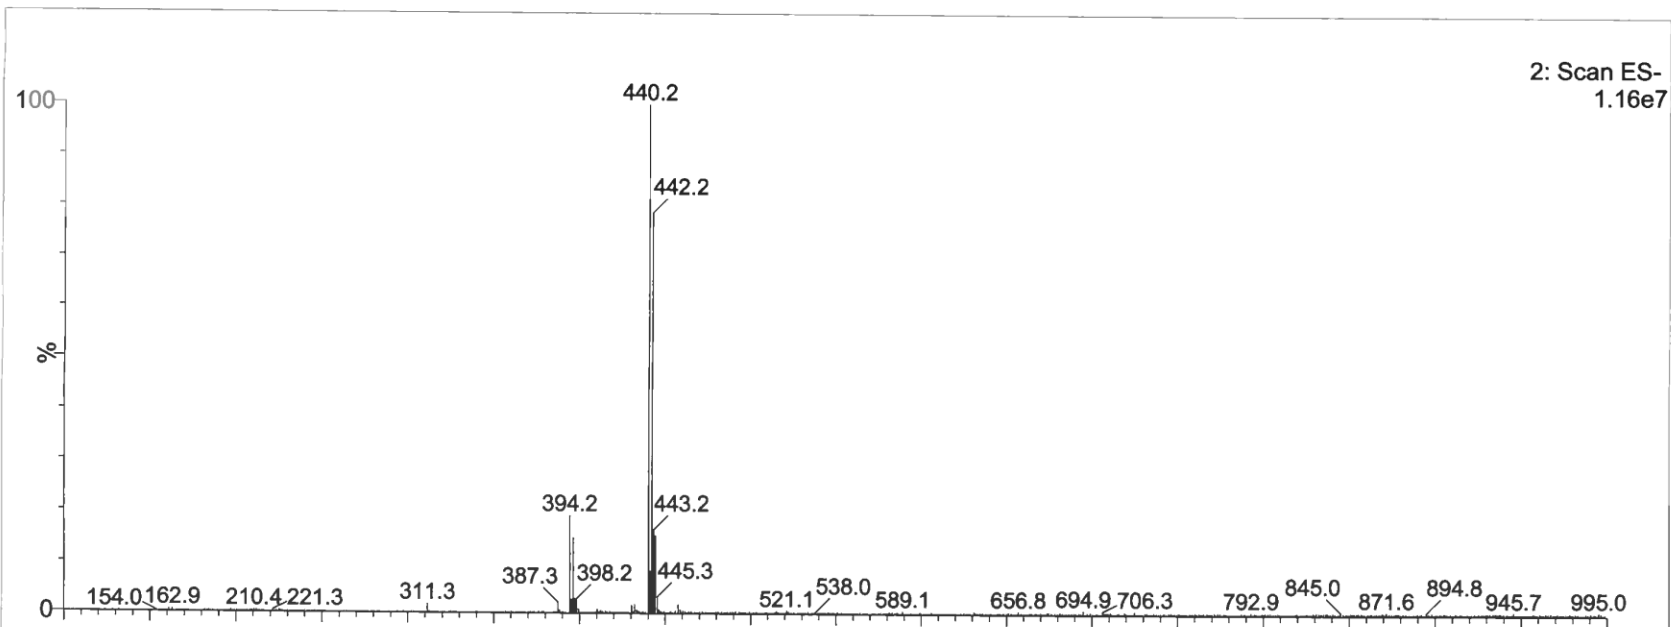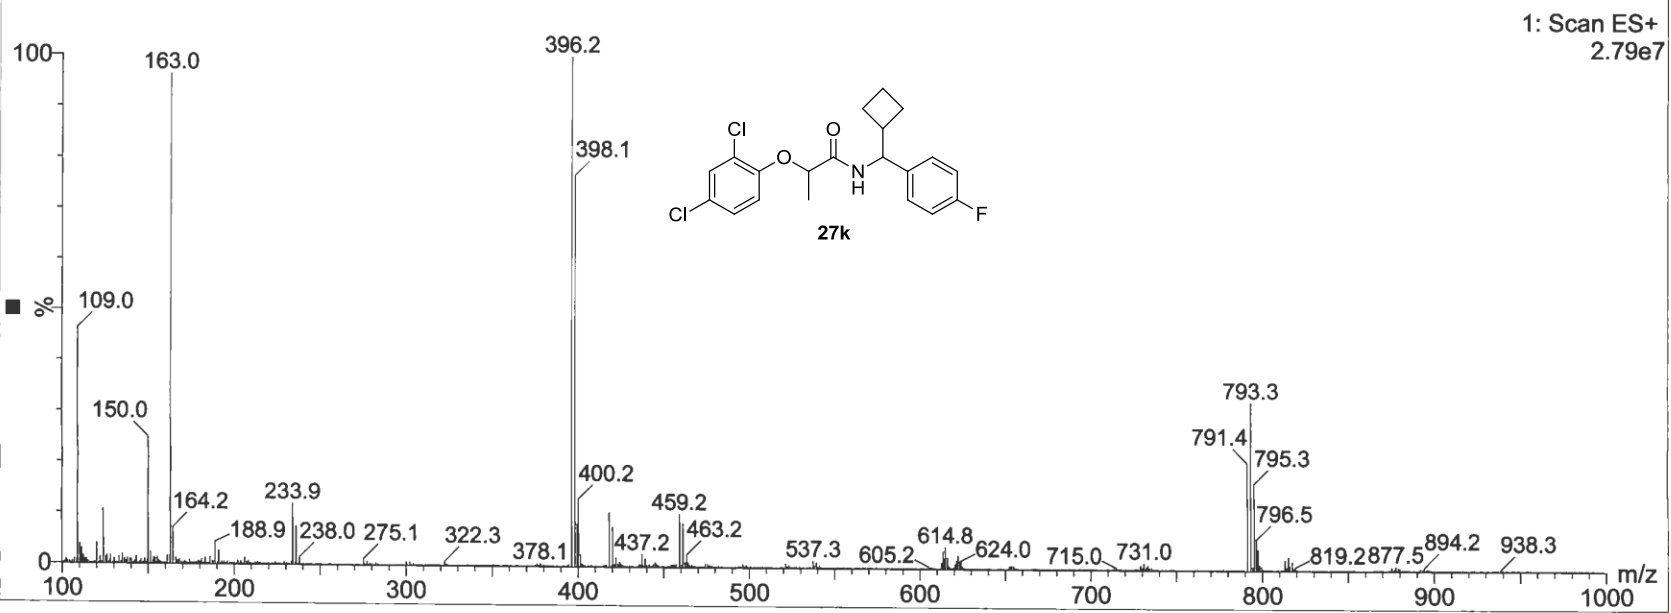

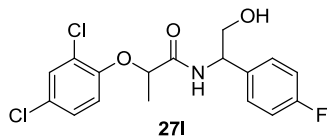

7.425  
 7.417  
 7.409  
 7.402  
 7.321  
 7.314  
 7.303  
 7.292  
 7.275  
 7.262  
 7.260  
 7.238  
 7.228  
 7.207  
 7.200  
 7.184  
 7.181  
 7.164  
 7.155  
 7.135  
 7.098  
 7.070  
 7.041  
 7.018  
 6.989  
 6.961  
 6.913  
 6.884  
 6.832  
 6.803  
 5.096  
 5.080  
 5.064  
 5.055  
 5.039  
 5.023  
 4.781  
 4.759  
 4.737  
 4.717  
 4.695  
 4.672  
 3.918  
 3.906  
 3.896  
 3.890  
 3.871  
 3.857  
 3.840  
 3.822  
 2.794  
 2.516  
 2.297  
 2.277  
 2.257  
 1.679  
 1.656  
 1.635  
 1.615  
 1.592

0.000

F2 - Acquisition Parameters  
 Date\_ 20120124  
 Time 16.33  
 INSTRUM spect  
 PROBHD 5 mm BBO BB-1H  
 PULPROG zg30  
 TD 65536  
 SOLVENT CDCl3  
 NS 16  
 DS 2  
 SWH 6172.839 Hz  
 FIDRES 0.094190 Hz  
 AQ 5.3084660 sec  
 RG 2298.8  
 DW 81.000 usec  
 DE 6.50 usec  
 TE 298.2 K  
 D1 1.00000000 sec  
 TDO 1

===== CHANNEL f1 =====  
 NUC1 1H  
 P1 10.00 usec  
 PL1 9.20 dB  
 SFO1 299.5018495 MHz

F2 - Processing parameters  
 SI 32768  
 SF 299.5000052 MHz  
 NDUW EM  
 SSB 0  
 LB 0.30 Hz  
 GB 0  
 PC 1.00

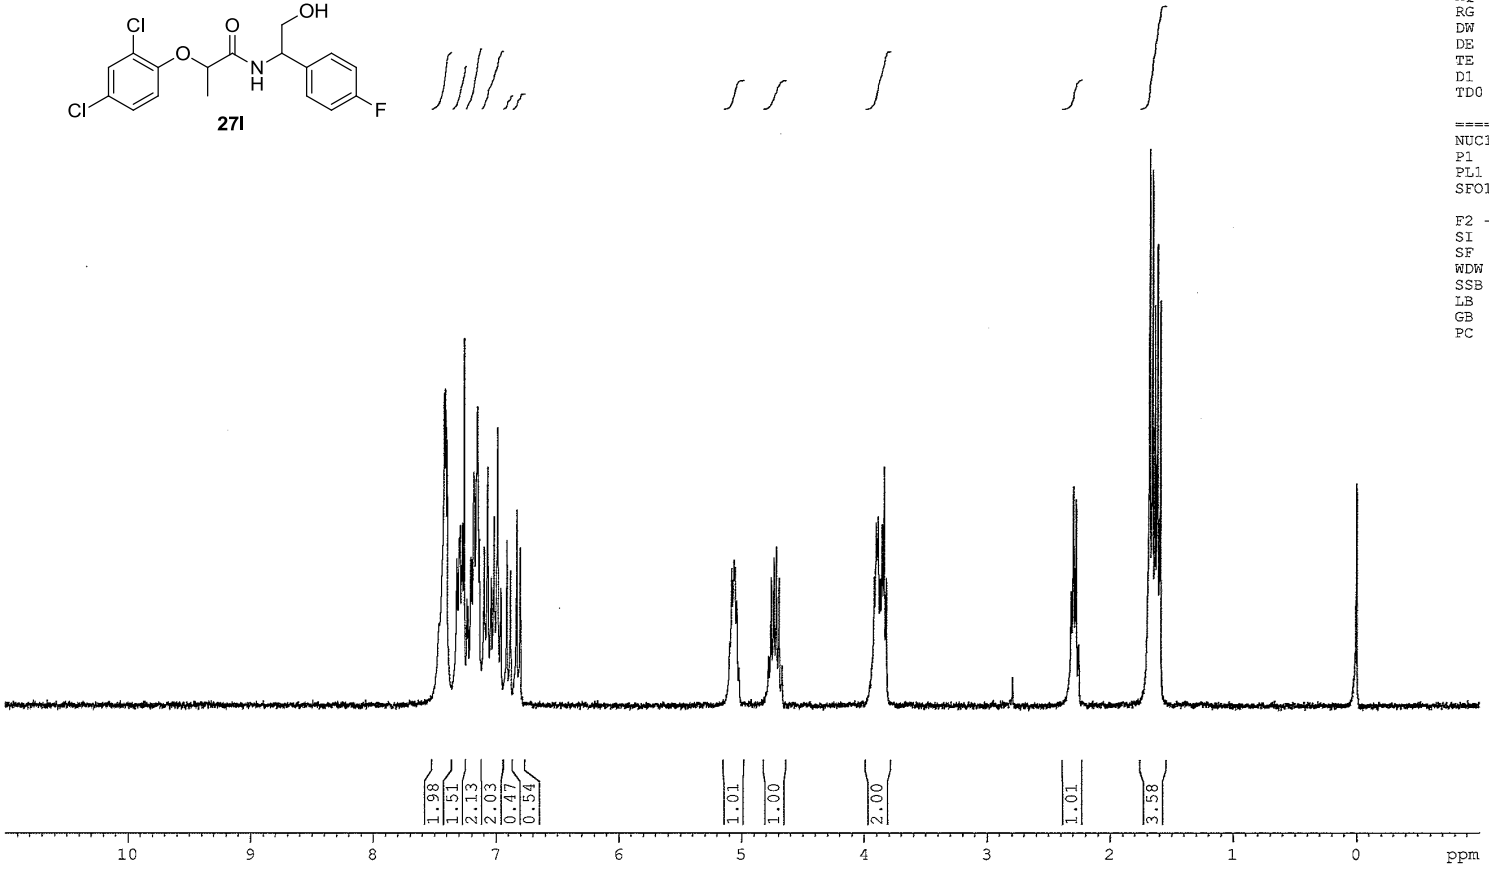

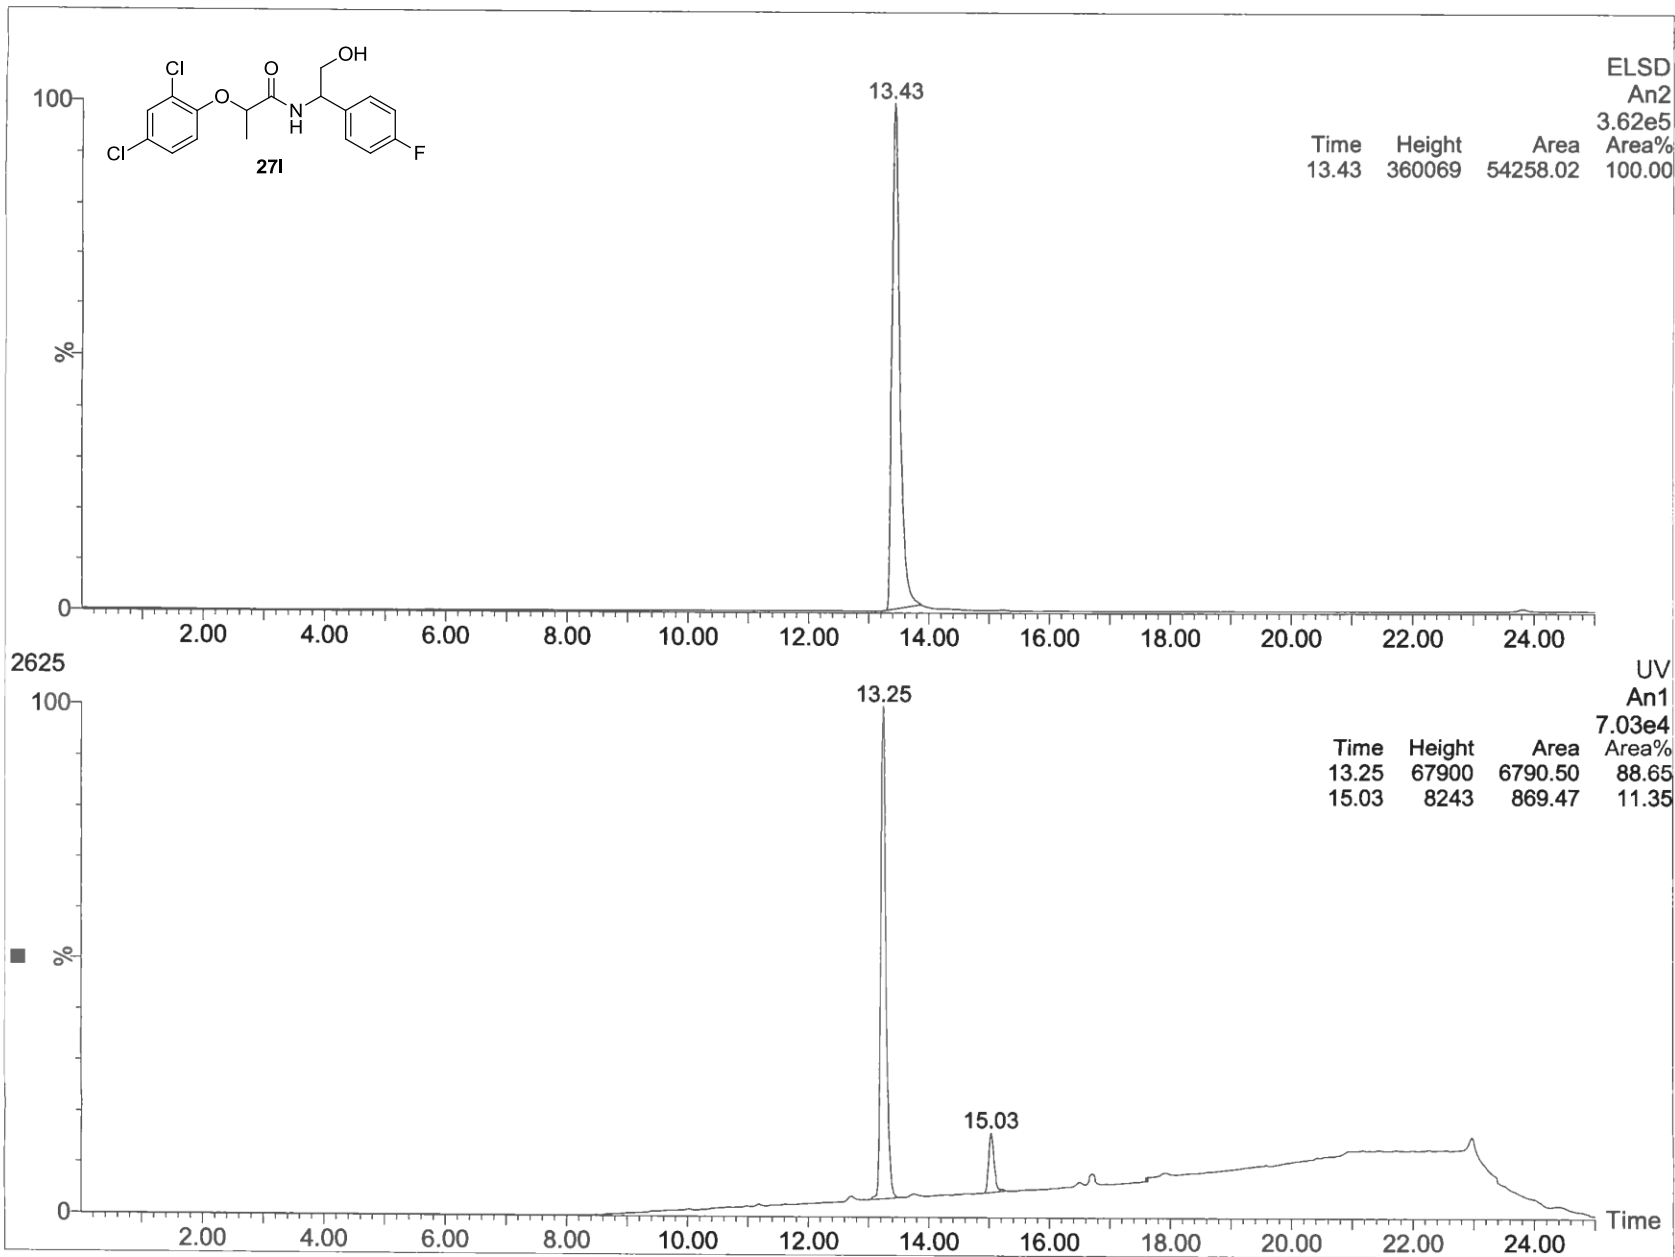

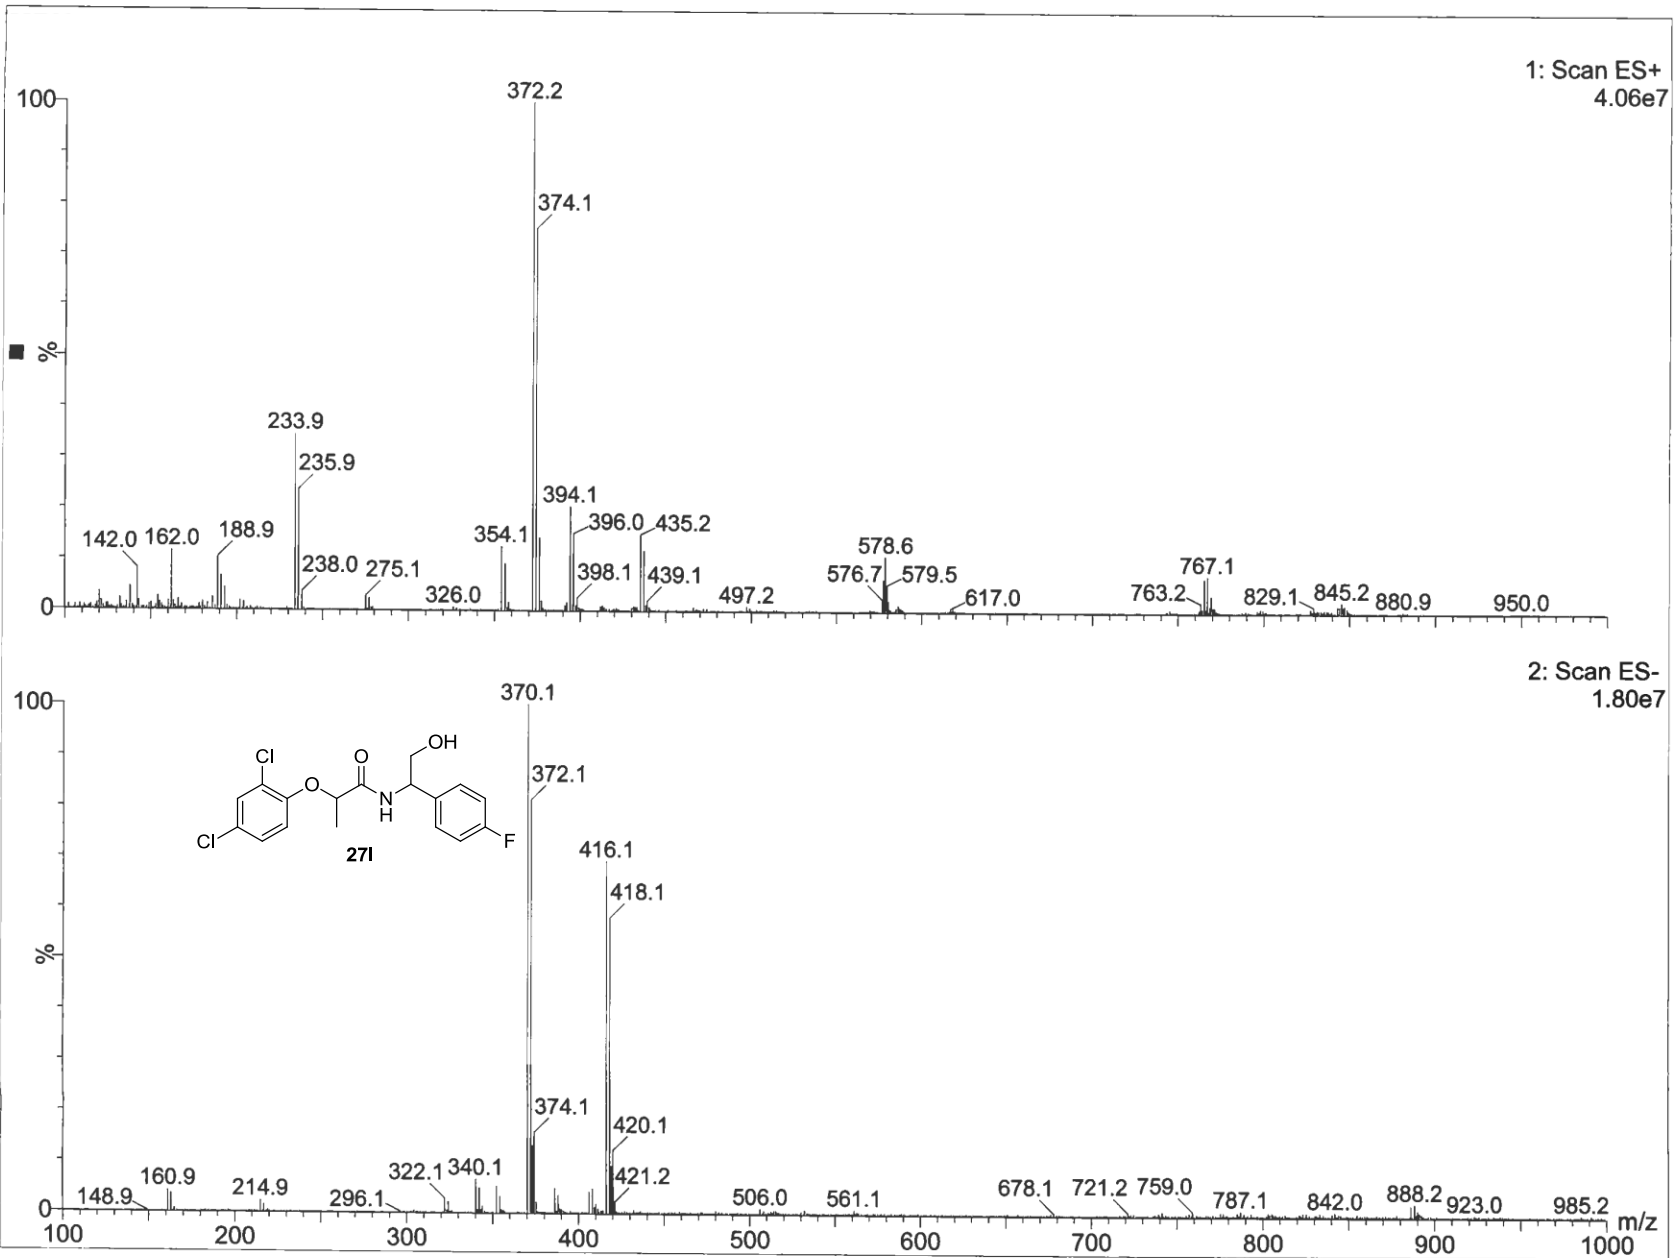

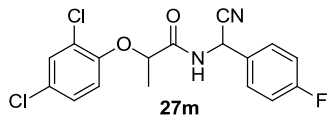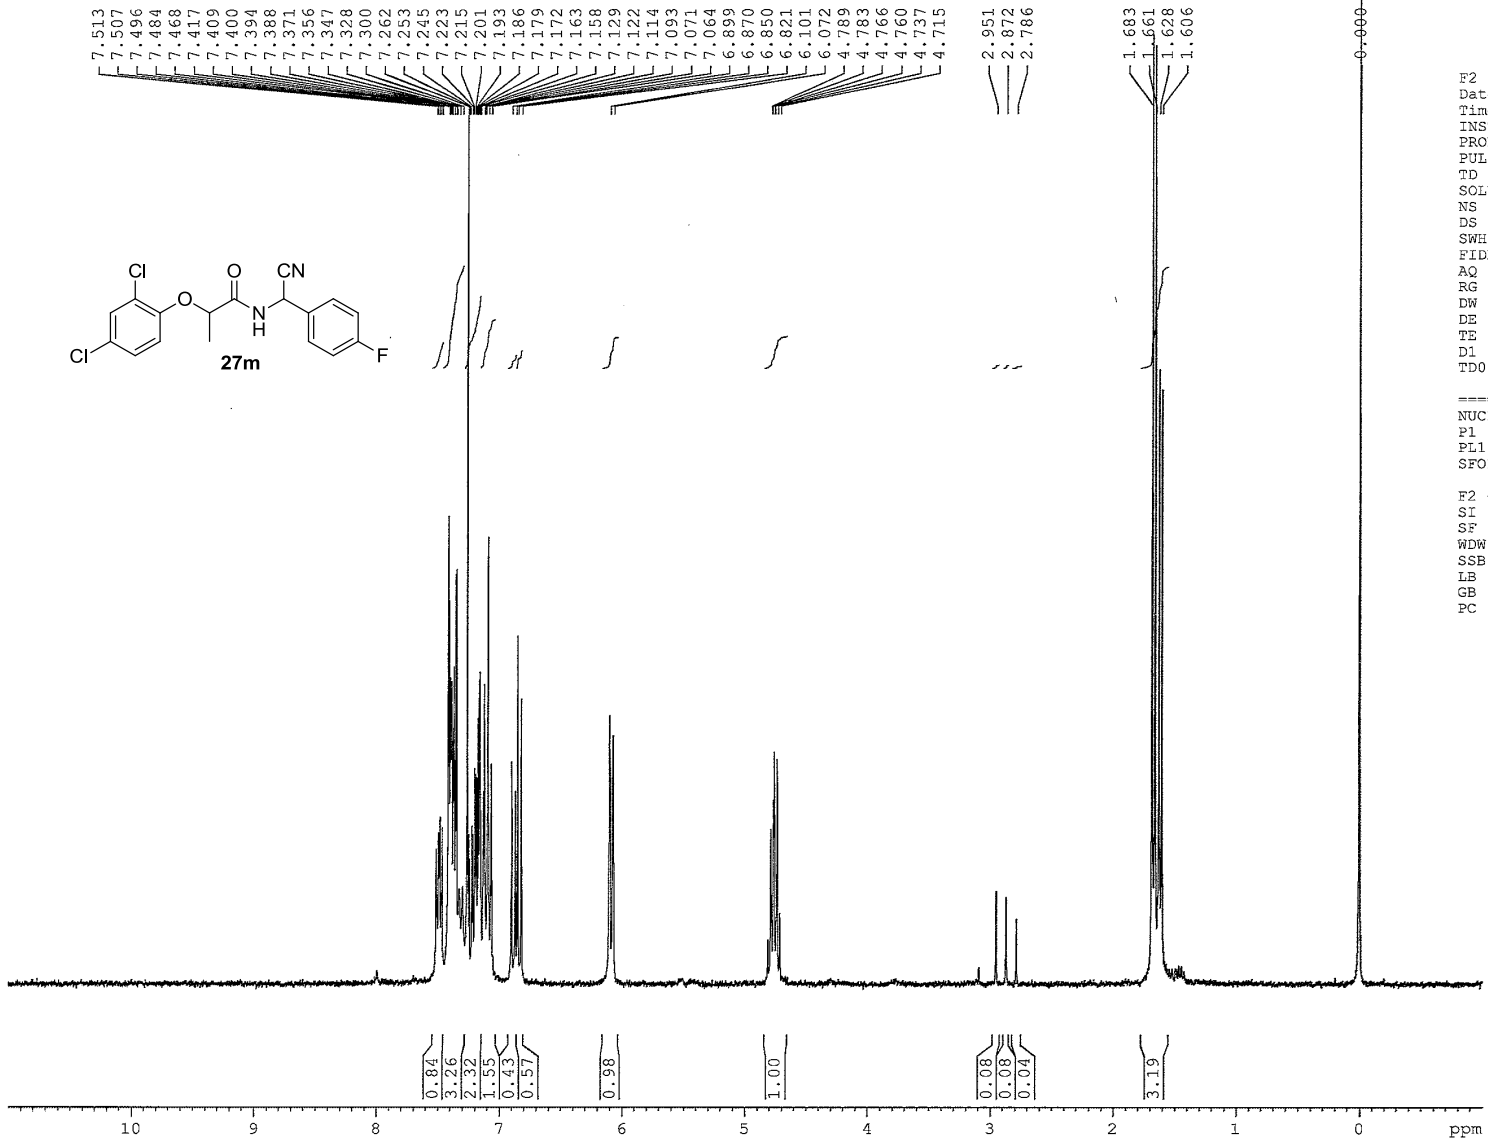

F2 - Acquisition Parameters  
 Date\_ 20120213  
 Time 11.43  
 INSTRUM spect  
 PROBHD 5 mm BBO BB-1H  
 PULPROG zg30  
 TD 65536  
 SOLVENT CDCl3  
 NS 16  
 DS 2  
 SWH 6172.839 Hz  
 FIDRES 0.094190 Hz  
 AQ 5.3084660 sec  
 RG 2298.8  
 DW 81.000 usec  
 DE 6.50 usec  
 TE 298.2 K  
 D1 1.0000000 sec  
 TD0 1

===== CHANNEL f1 =====  
 NUC1 1H  
 P1 10.00 usec  
 PL1 9.20 dB  
 SFO1 299.5018495 MHz

F2 - Processing parameters  
 SI 32768  
 SF 299.5000050 MHz  
 WDW EM  
 SSB 0  
 LB 0.30 Hz  
 GB 0  
 PC 1.00

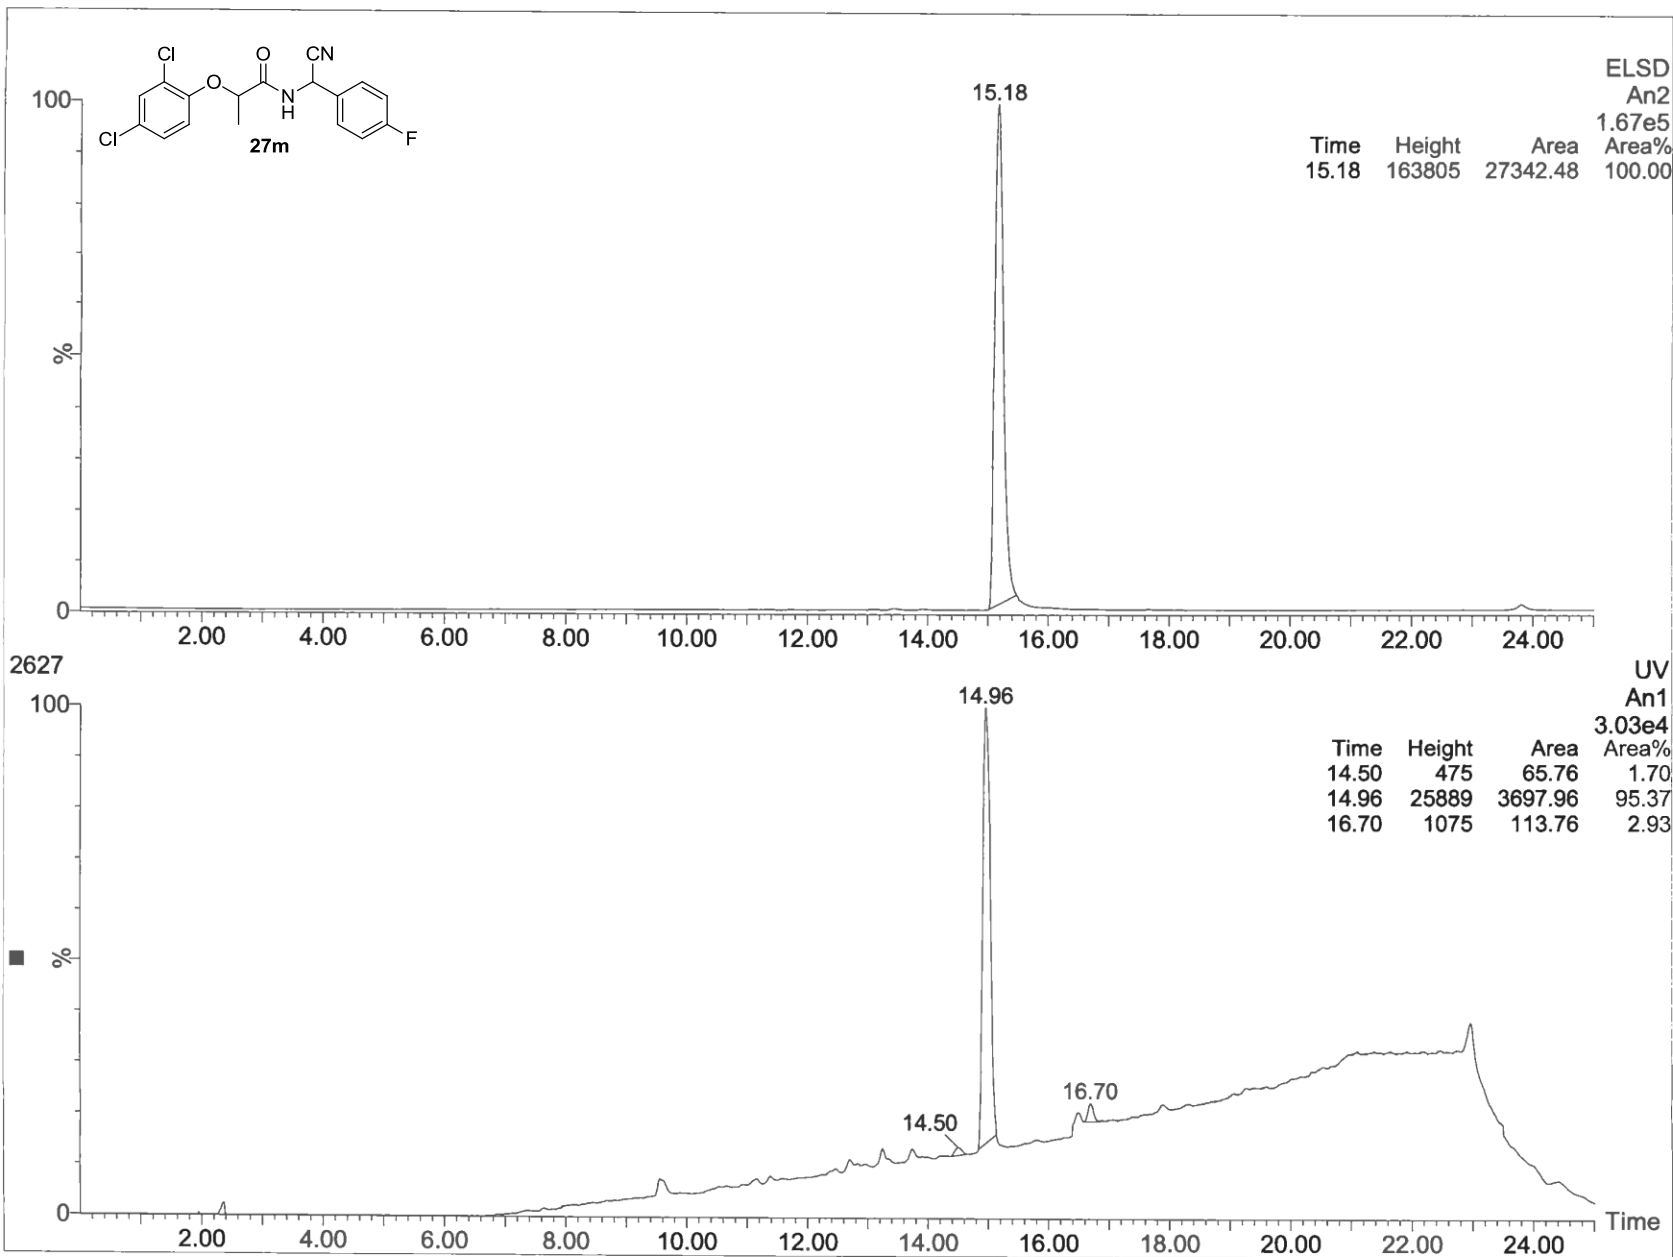



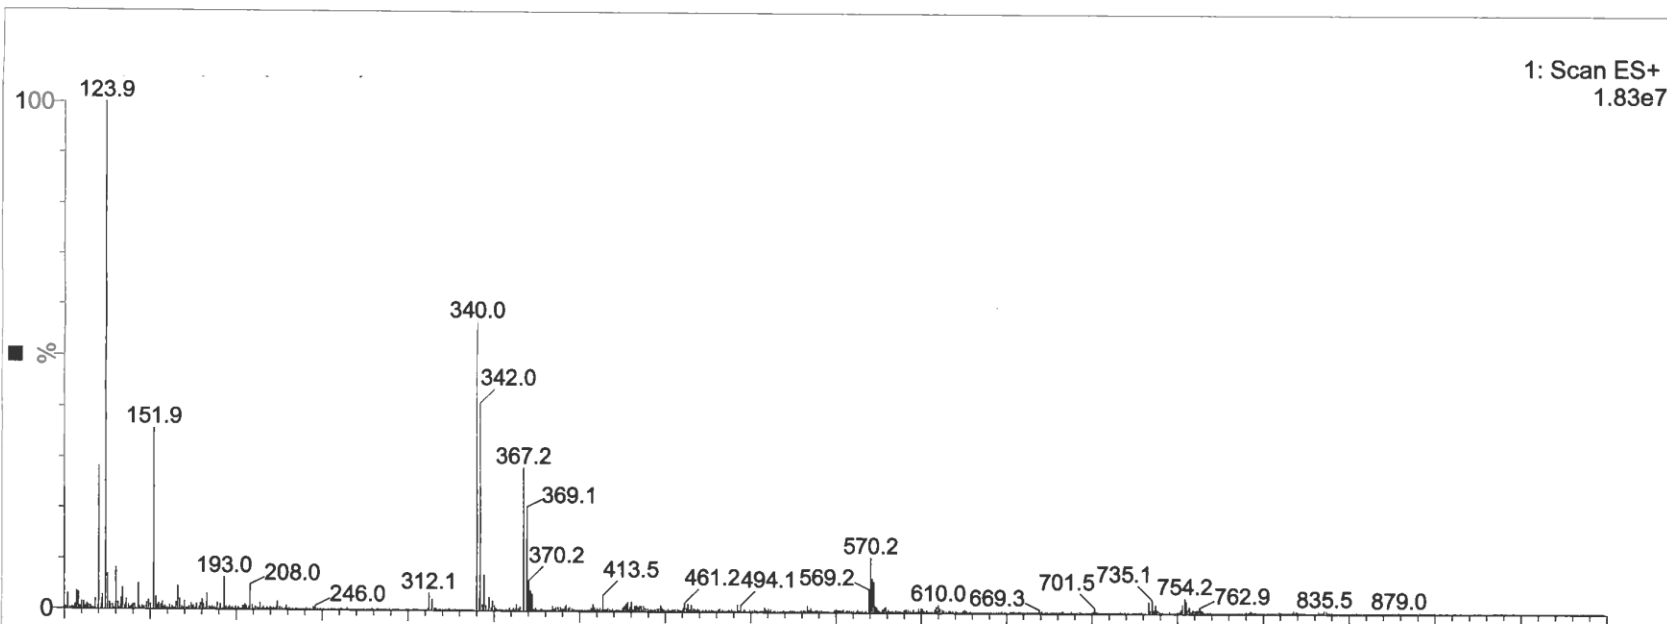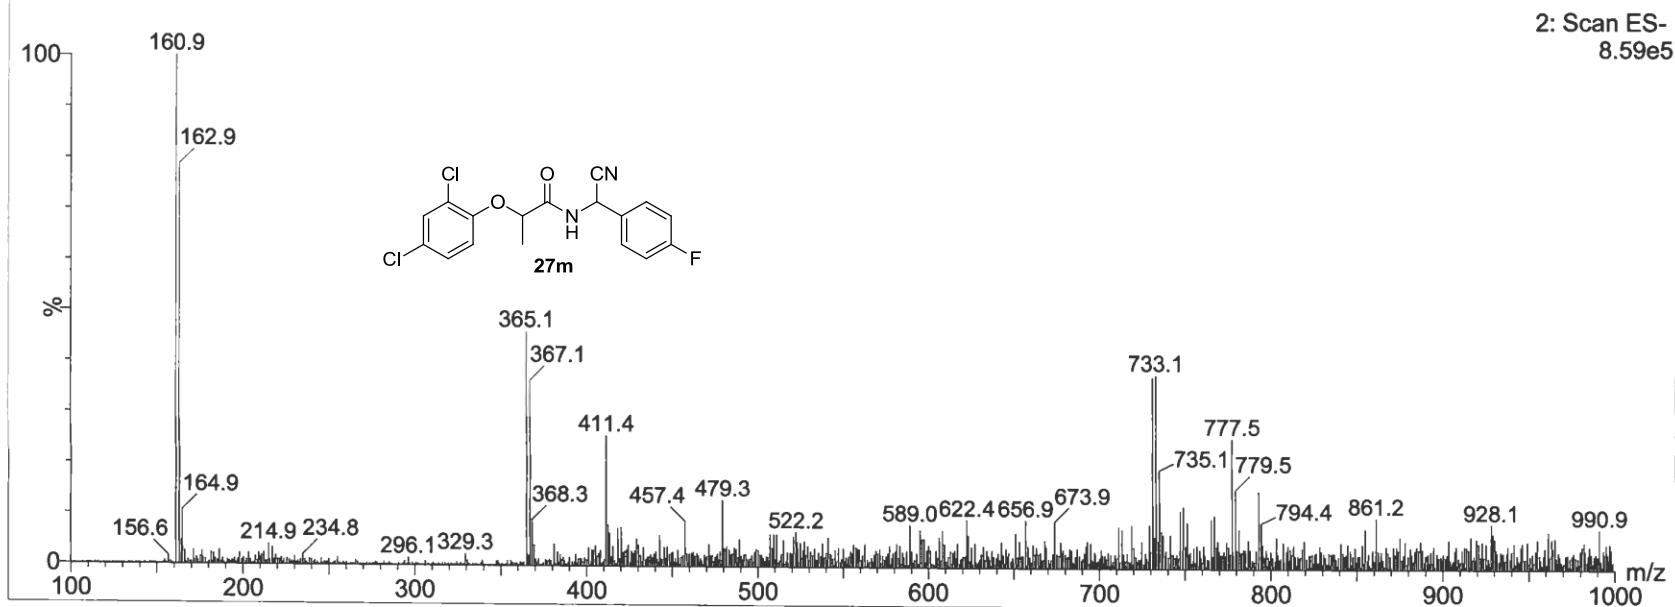

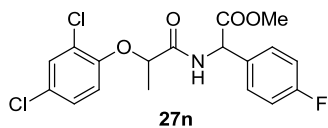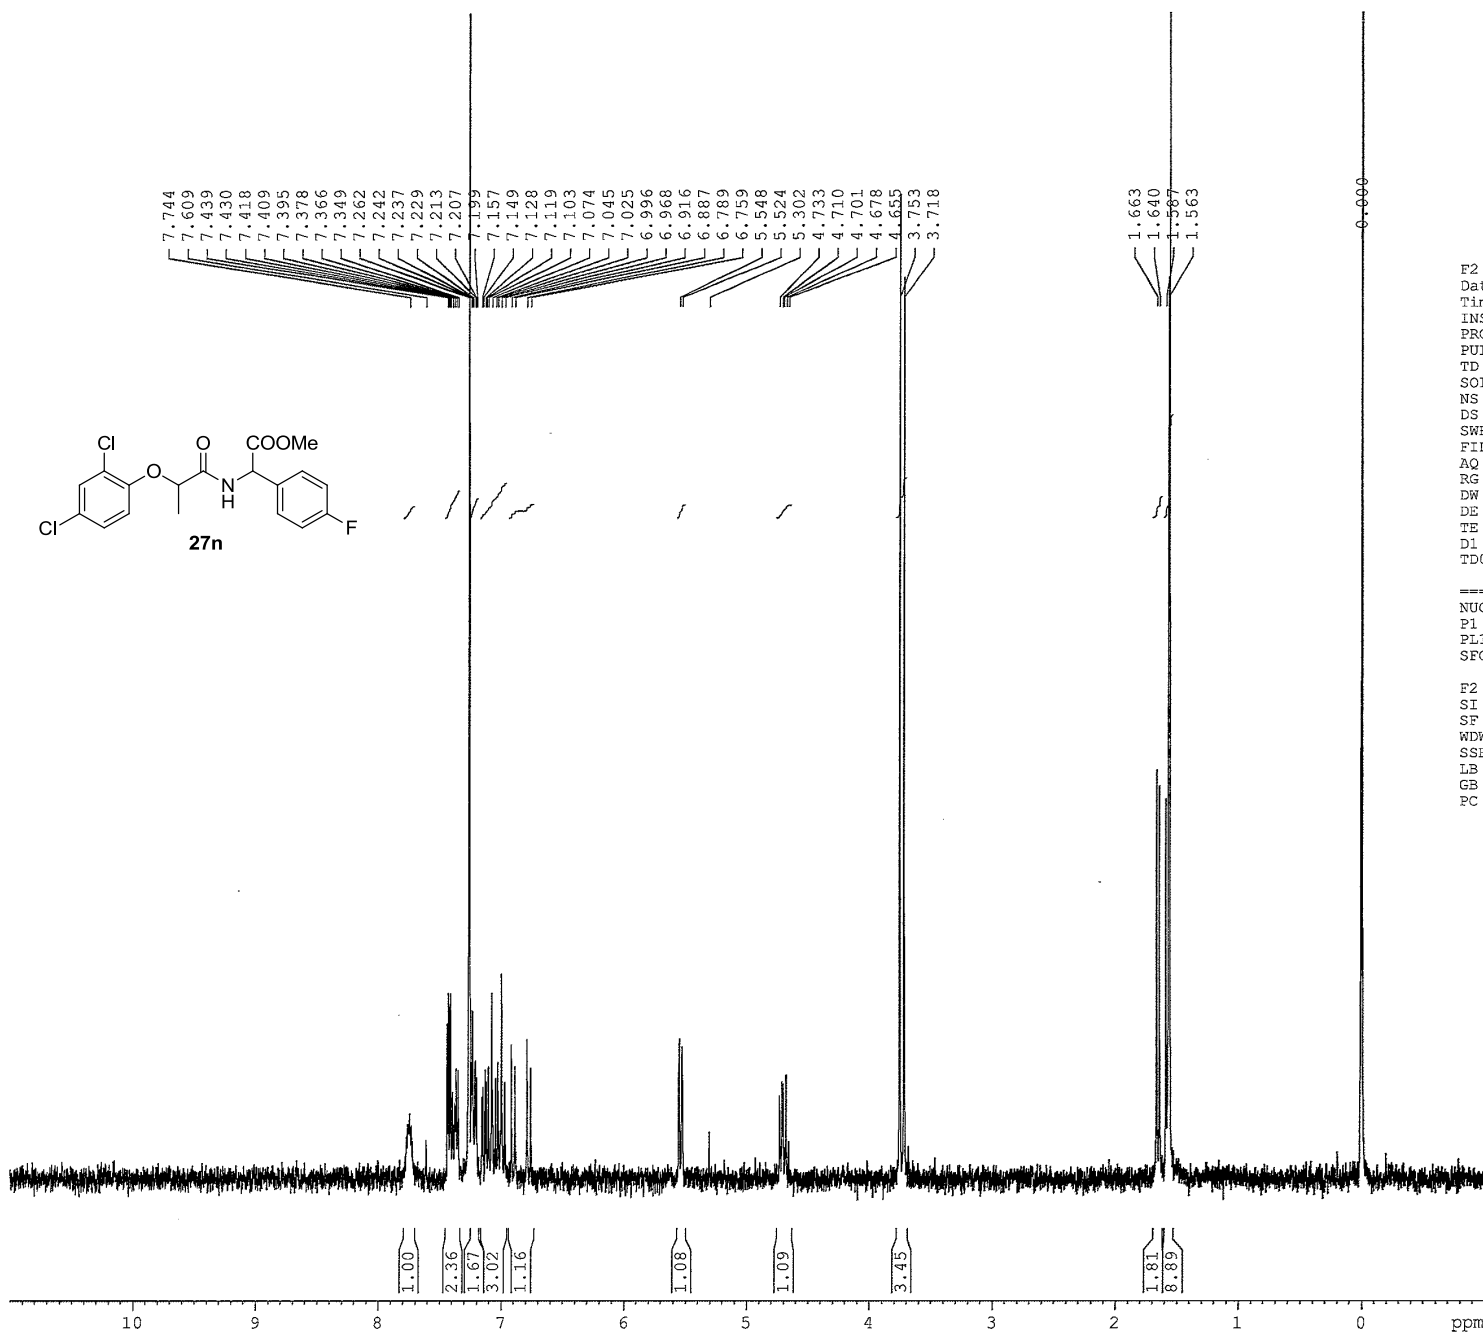

F2 - Acquisition Parameters  
 Date\_ 20120521  
 Time\_ 15.48  
 INSTRUM spect  
 PROBHD 5 mm BBO BB-1H  
 PULPROG zg30  
 TD 65536  
 SOLVENT CDCl3  
 NS 16  
 DS 2  
 SWH 6172.839 Hz  
 FIDRES 0.094190 Hz  
 AQ 5.3084660 sec  
 RG 5160.6  
 DW 81.000 usec  
 DE 6.50 usec  
 TE 294.6 K  
 D1 1.00000000 sec  
 TD0 1

===== CHANNEL f1 =====  
 NUC1 1H  
 P1 10.00 usec  
 PL1 9.20 dB  
 SFO1 299.5018495 MHz

F2 - Processing parameters  
 SI 32768  
 SF 299.5000052 MHz  
 WDW EM  
 SSB 0  
 LB 0.30 Hz  
 GB 0  
 PC 1.00

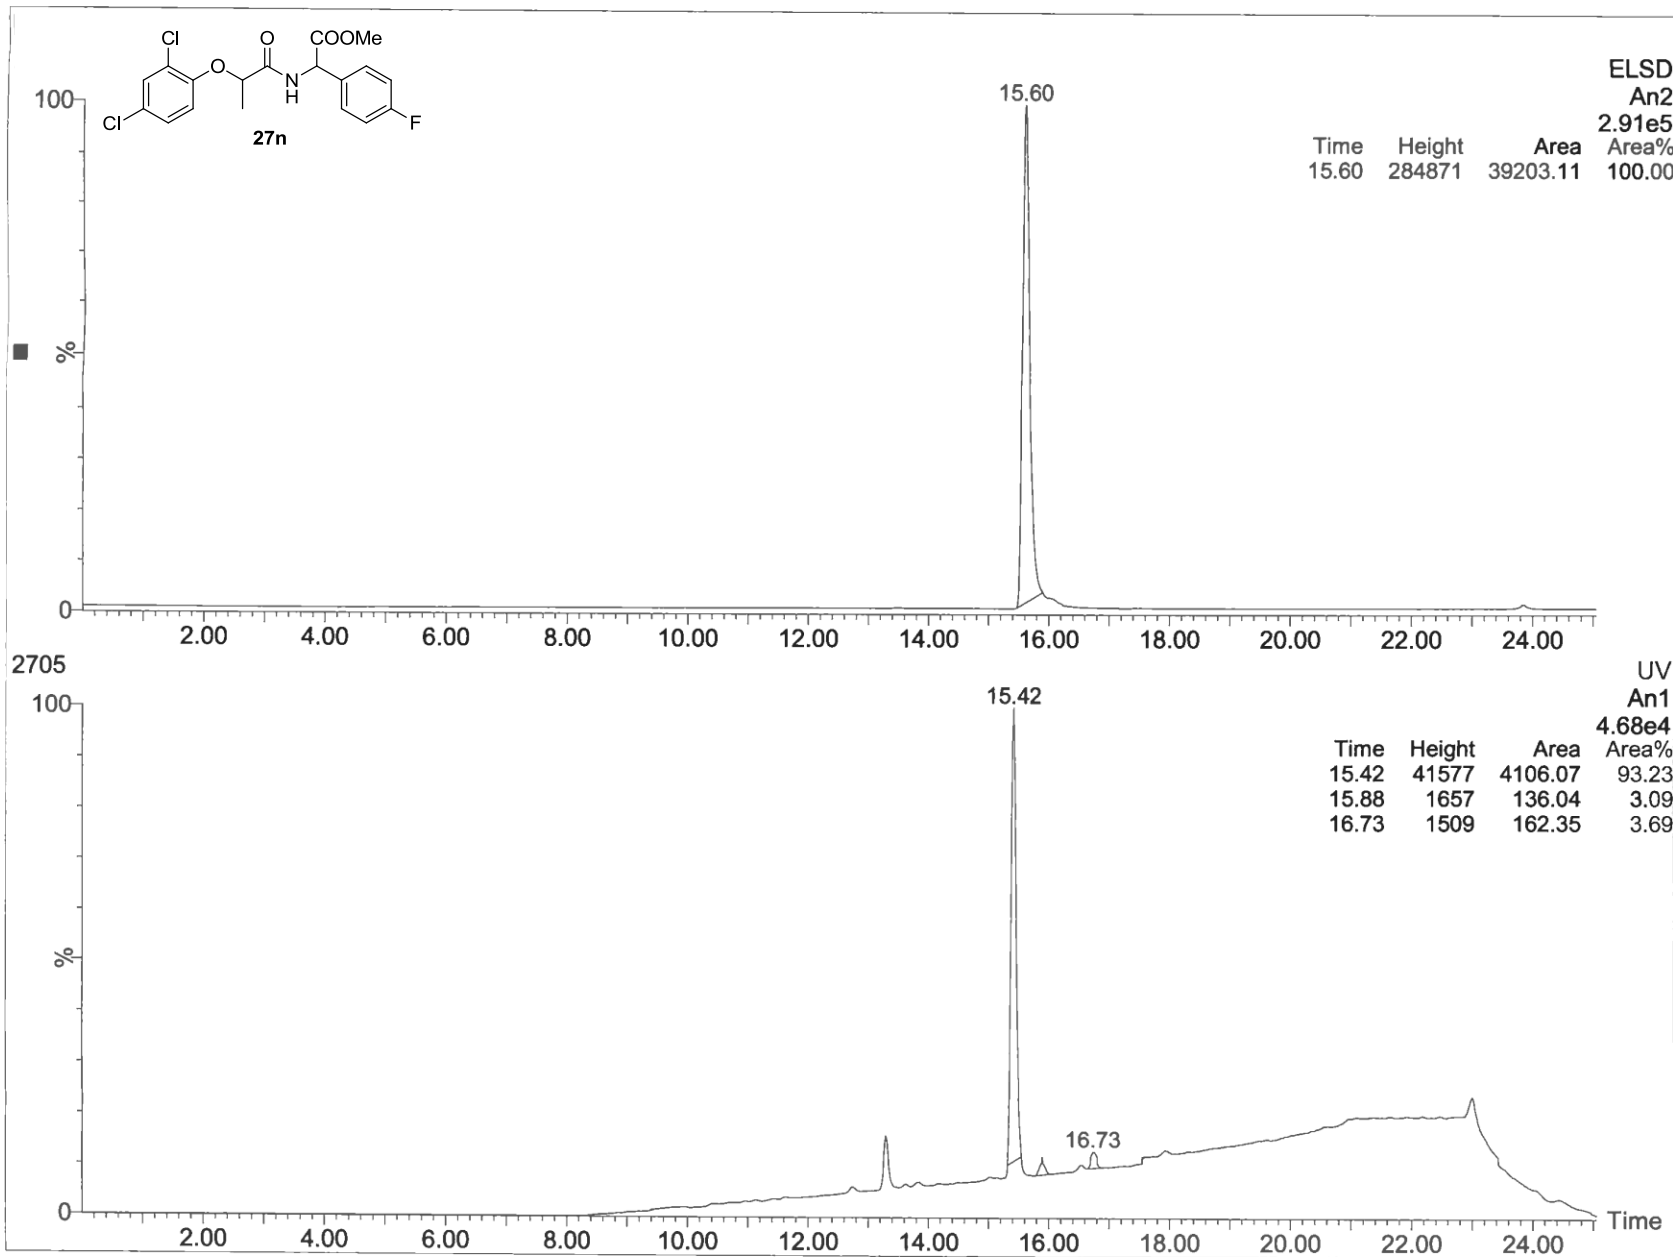

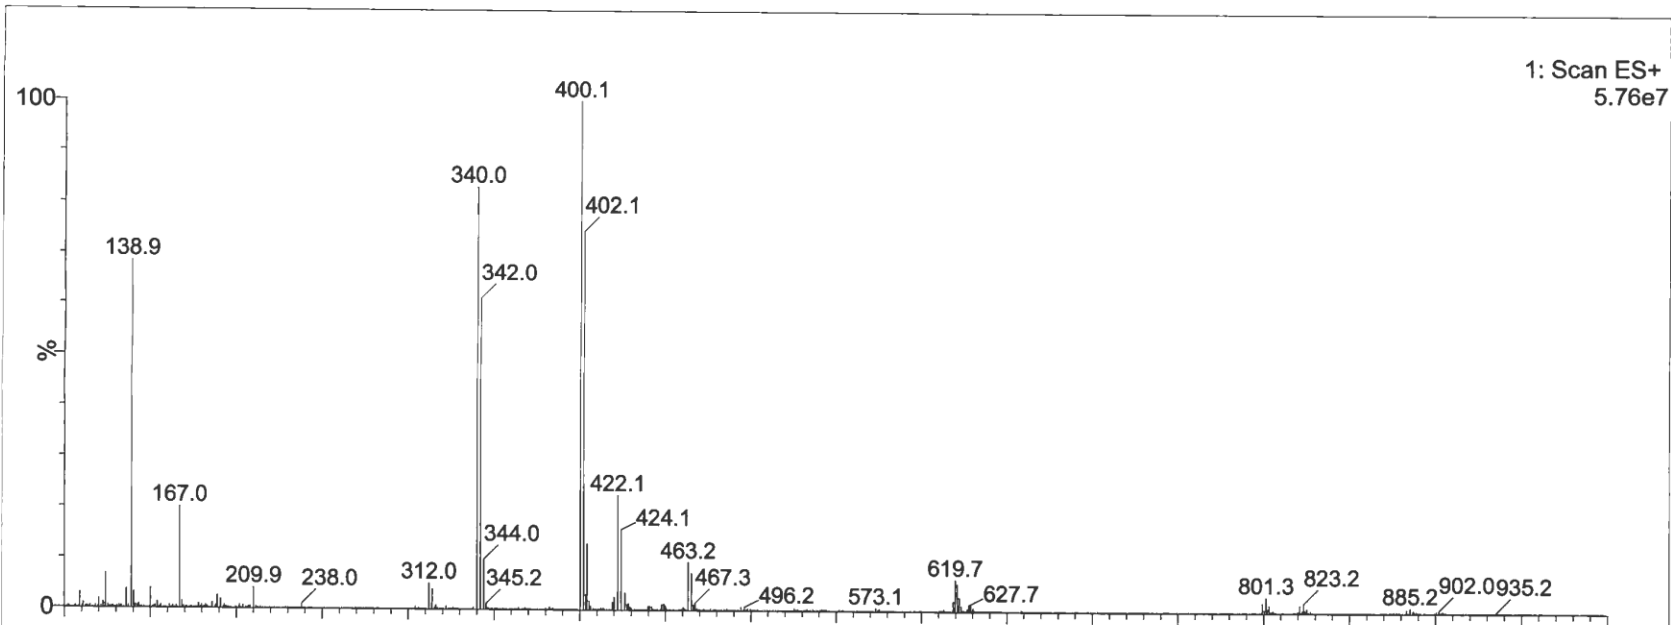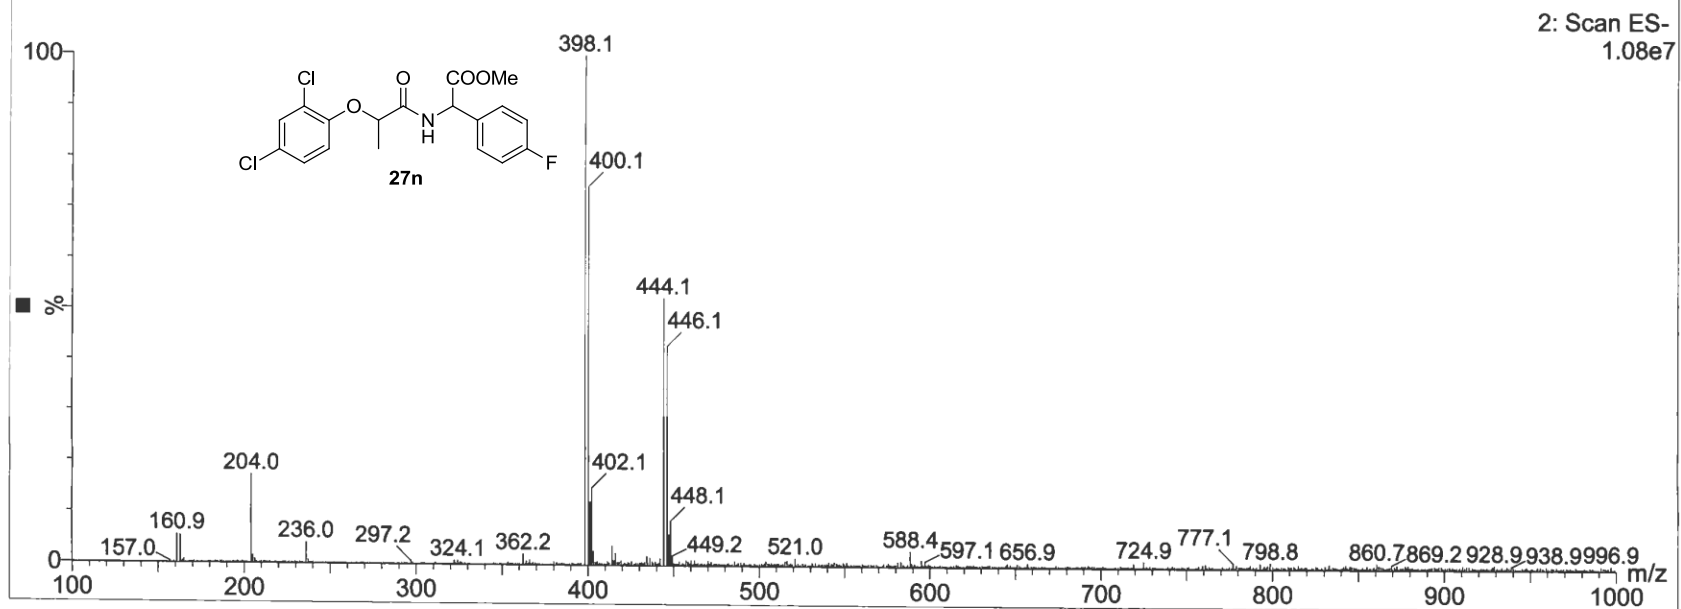

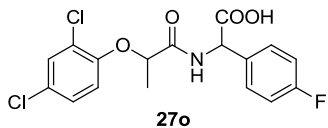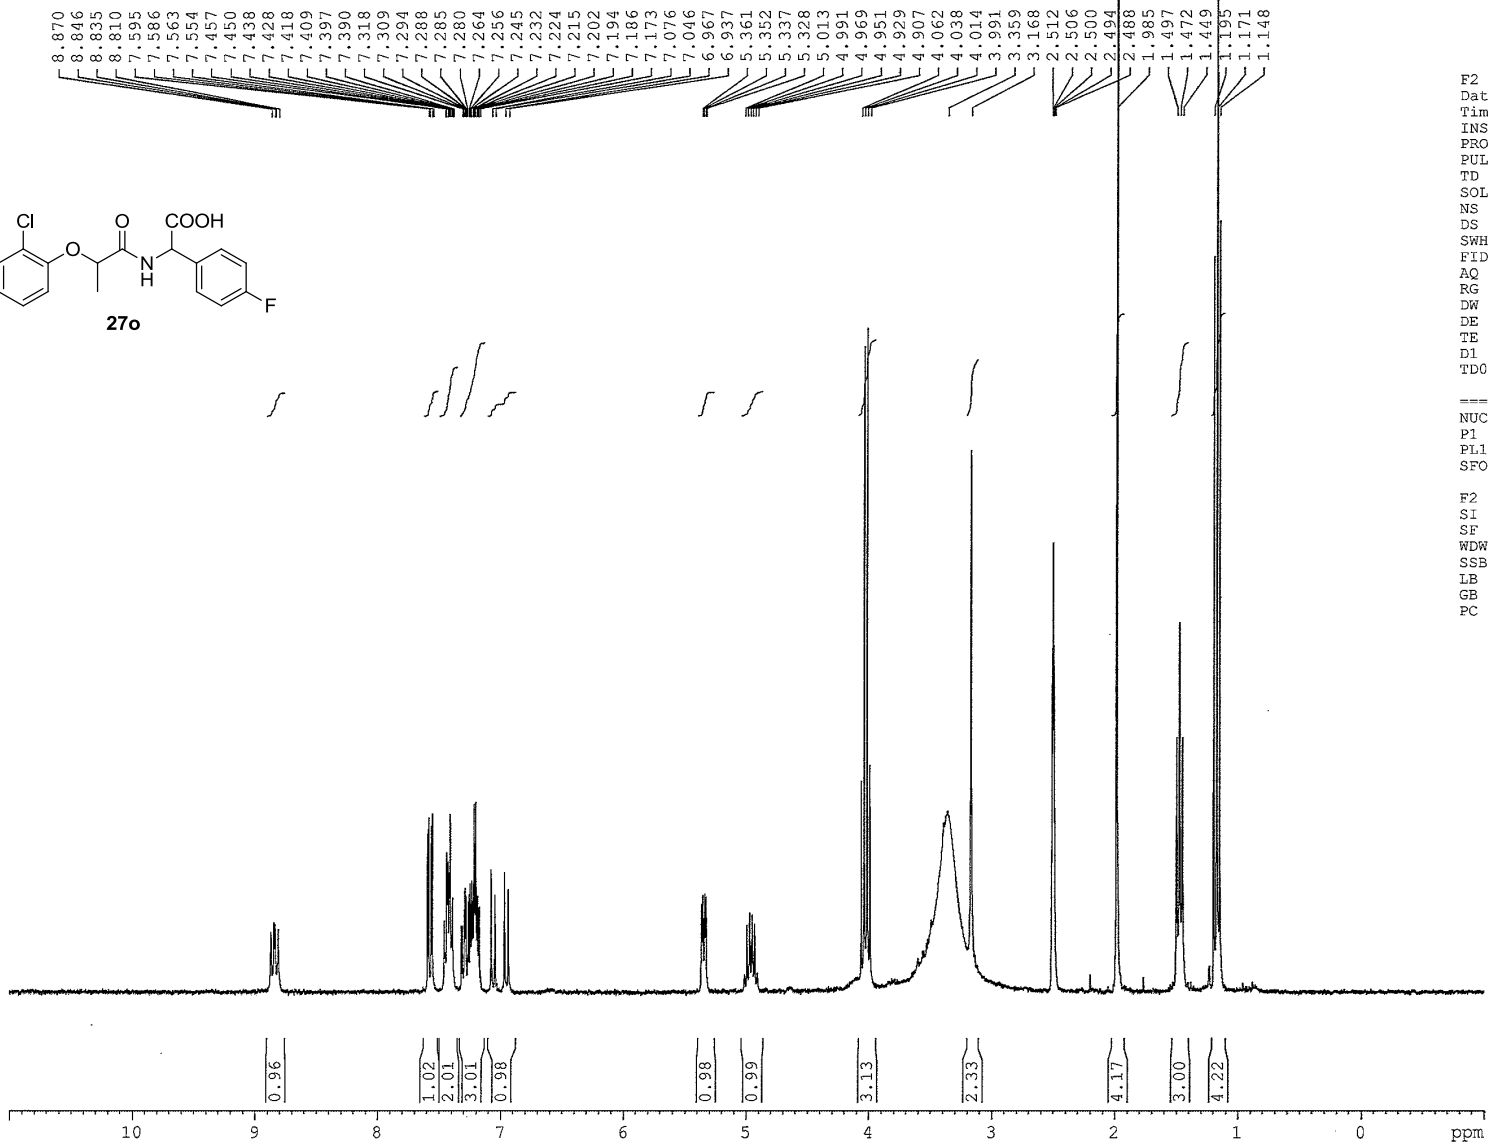

F2 - Acquisition Parameters

Date\_ 20120526  
 Time\_ 14.21  
 INSTRUM spect  
 PROBRD 5 mm BBO BB-1H  
 PULPROG zg30  
 TD 65536  
 SOLVENT DMSO  
 NS 16  
 DS 2  
 SWH 6172.839 Hz  
 FIDRES 0.094190 Hz  
 AQ 5.3084660 sec  
 RG 1625.5  
 DW 81.000 usec  
 DE 6.50 usec  
 TE 298.7 K  
 D1 1.00000000 sec  
 TD0 1

===== CHANNEL f1 =====

NUC1 1H  
 P1 10.00 usec  
 PL1 9.20 dB  
 SFO1 299.5018495 MHz

F2 - Processing parameters

SI 32768  
 SF 299.5000008 MHz  
 WDW EM  
 SSB 0  
 LB 0.30 Hz  
 GB 0  
 PC 1.00

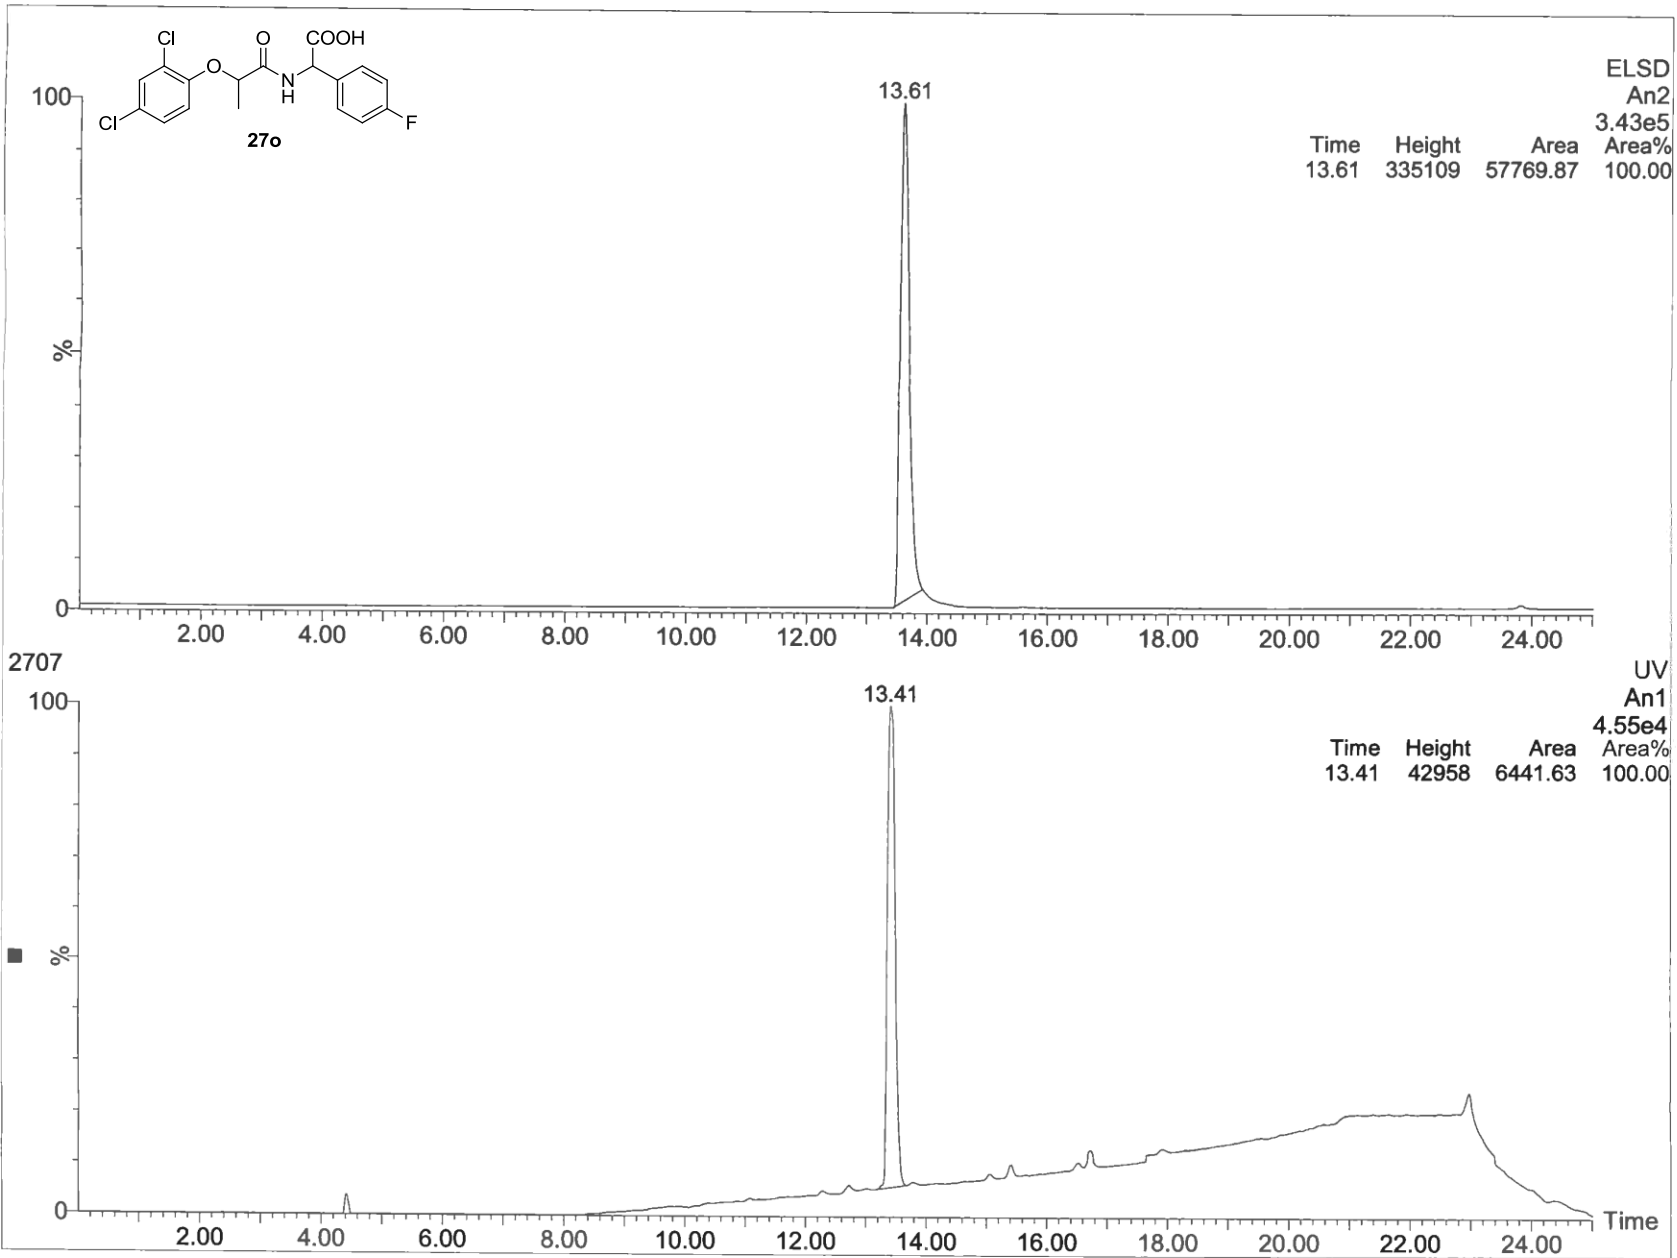

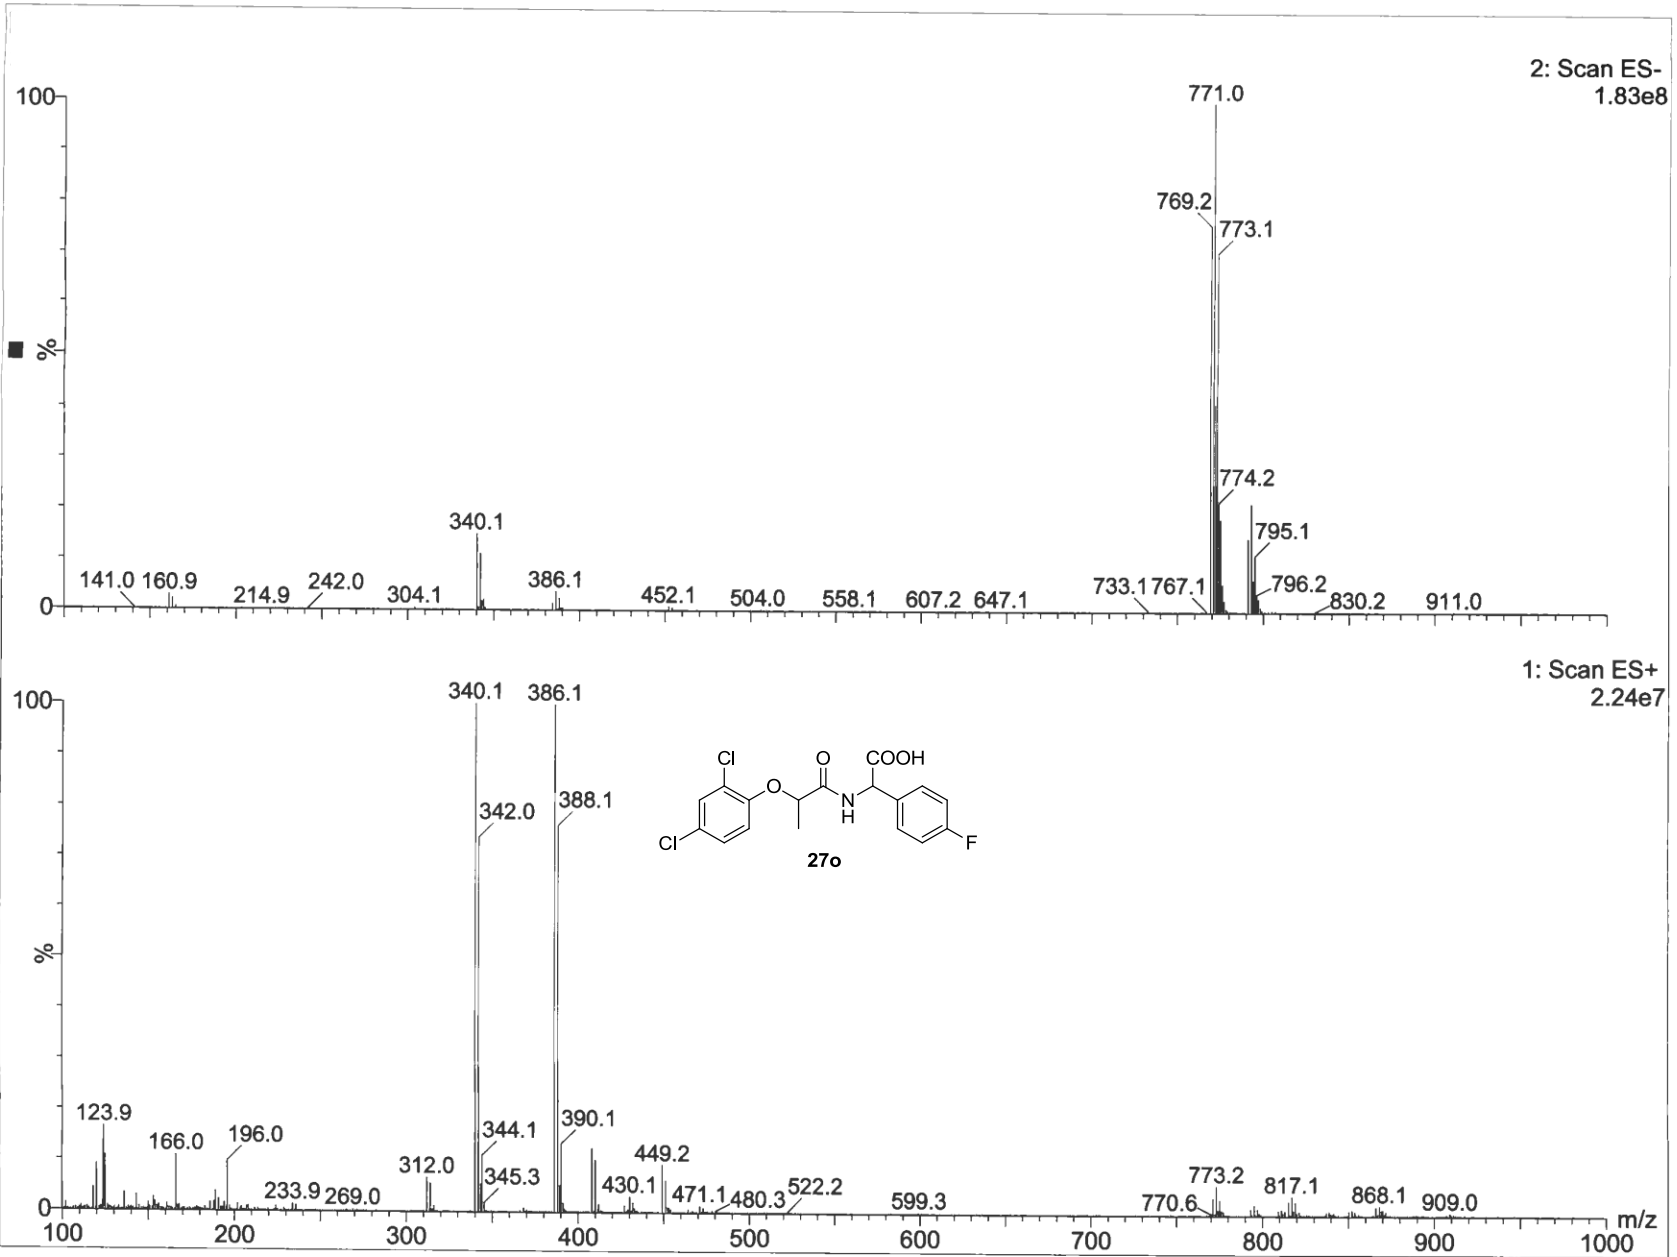

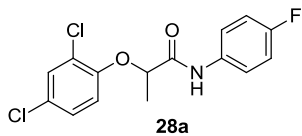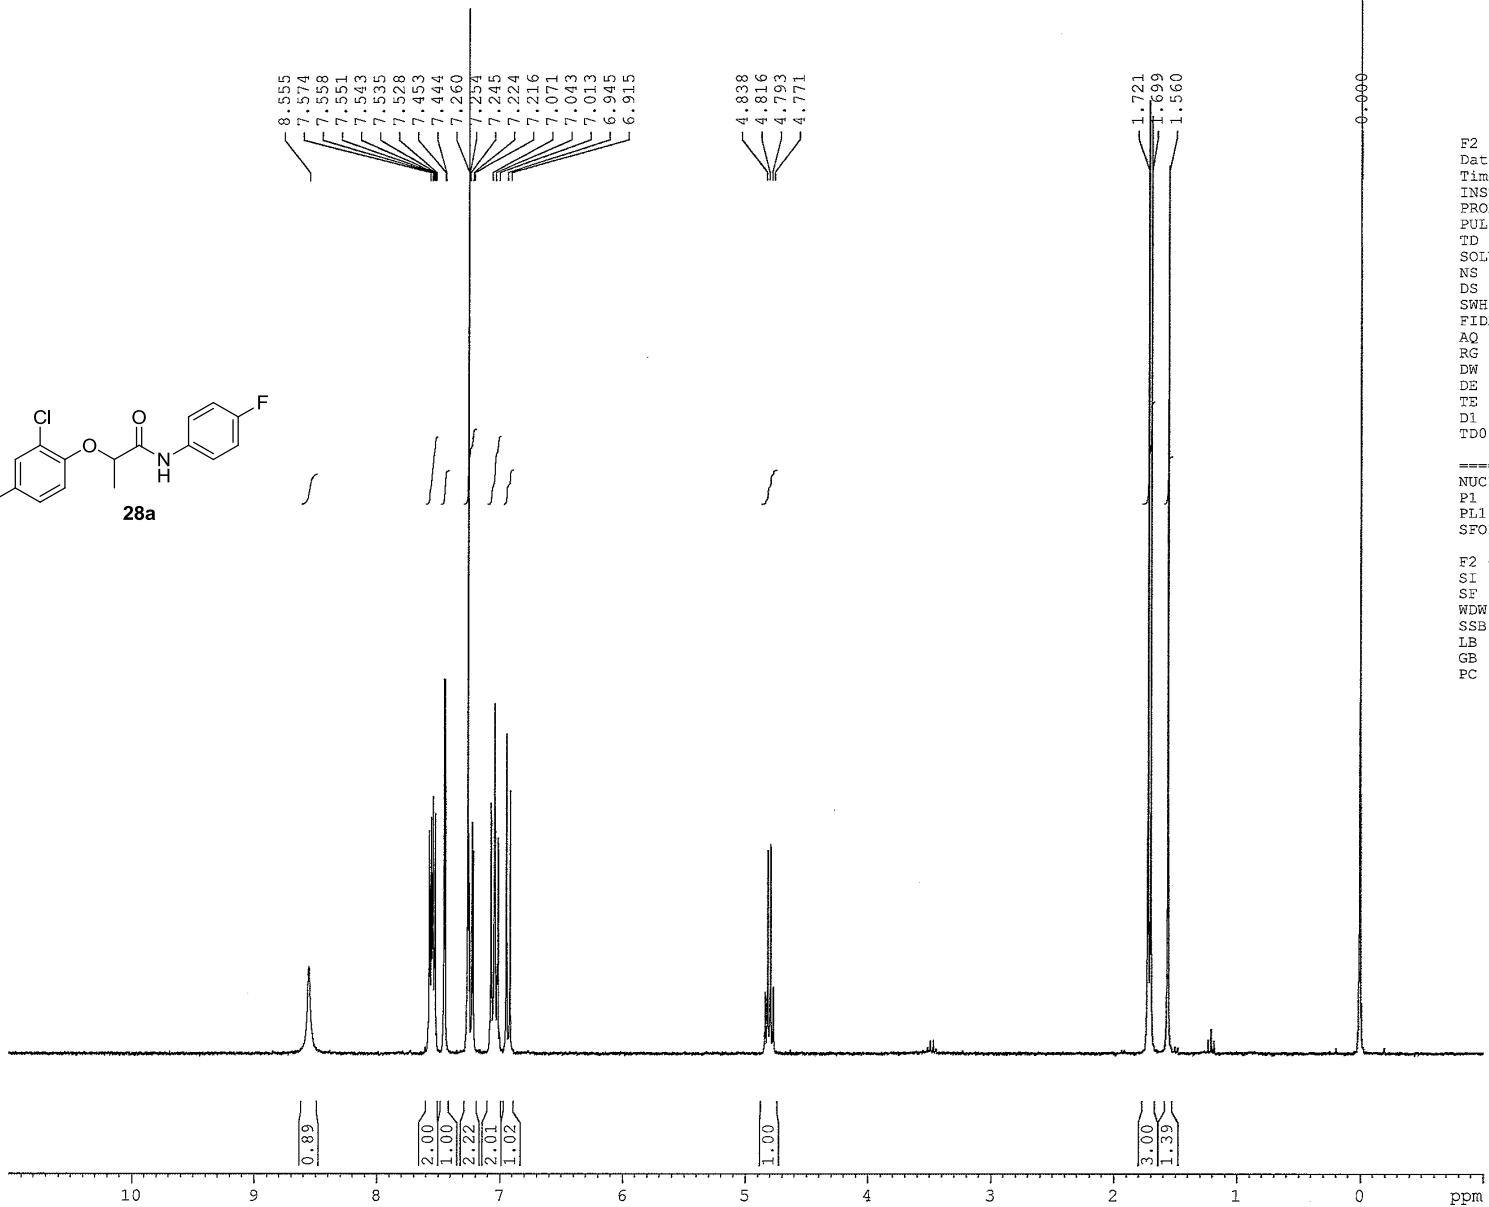

F2 - Acquisition Parameters  
 Date 20100524  
 Time 11.17  
 INSTRUM spect  
 PROBHD 5 mm BBO BB-1H  
 PULPROG zg30  
 TD 65536  
 SOLVENT CDCl3  
 NS 16  
 DS 2  
 SWH 6172.839 Hz  
 FIDRES 0.094190 Hz  
 AQ 5.3084660 sec  
 RG 2048  
 DW 81.000 usec  
 DE 6.50 usec  
 TE 298.2 K  
 D1 1.00000000 sec  
 TD0 1

==== CHANNEL f1 =====  
 NUC1 1H  
 P1 10.00 usec  
 PL1 9.20 dB  
 SFO1 299.5718500 MHz

F2 - Processing parameters  
 SI 32768  
 SF 299.5700028 MHz  
 WDW EM  
 SSB 0  
 LB 0.30 Hz  
 GB 0  
 PC 1.00



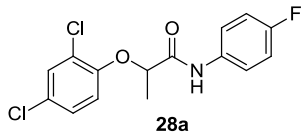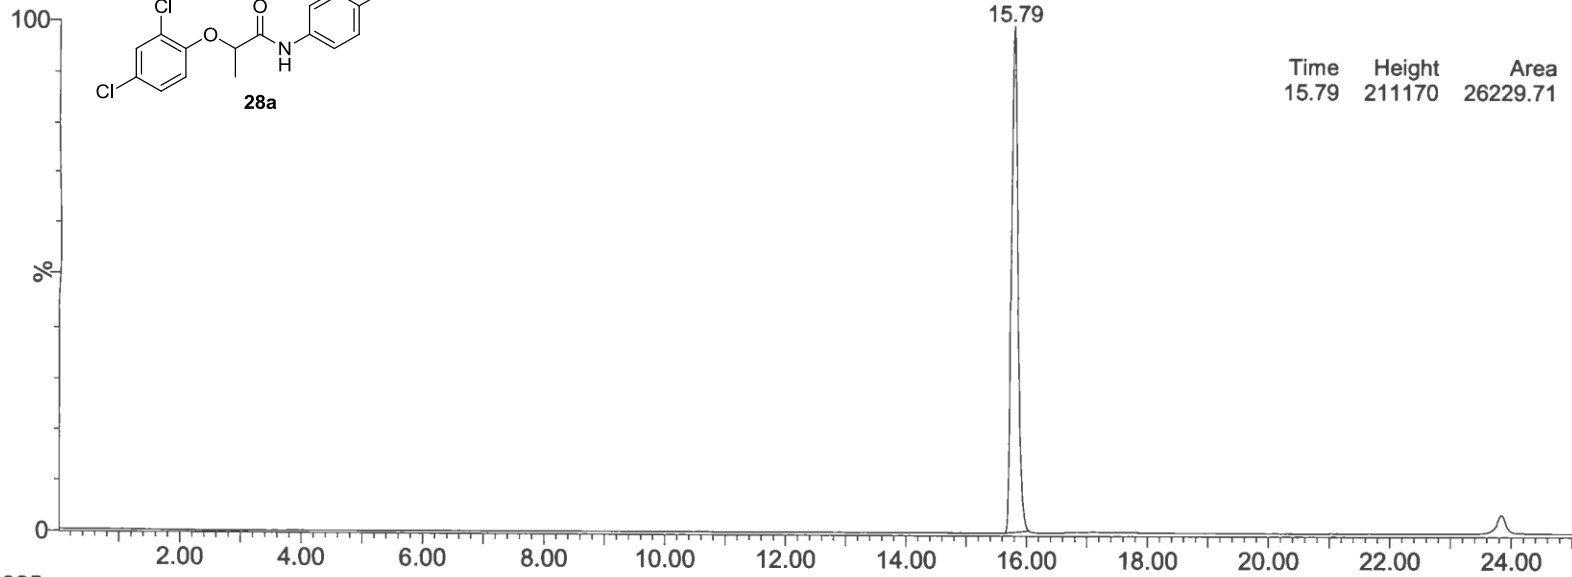

ELSD  
An2  
2.13e5

| Time  | Height | Area     | Area%  |
|-------|--------|----------|--------|
| 15.79 | 211170 | 26229.71 | 100.00 |

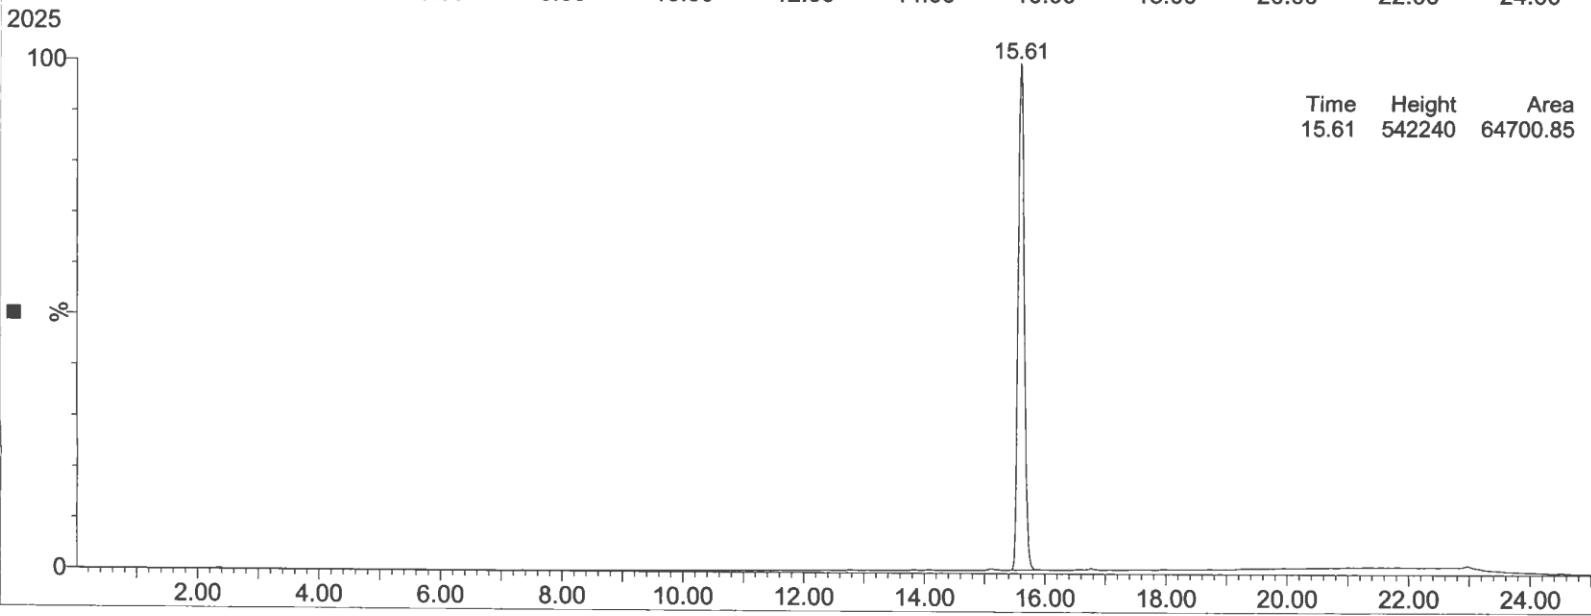

UV  
An1  
5.46e5

| Time  | Height | Area     | Area%  |
|-------|--------|----------|--------|
| 15.61 | 542240 | 64700.85 | 100.00 |

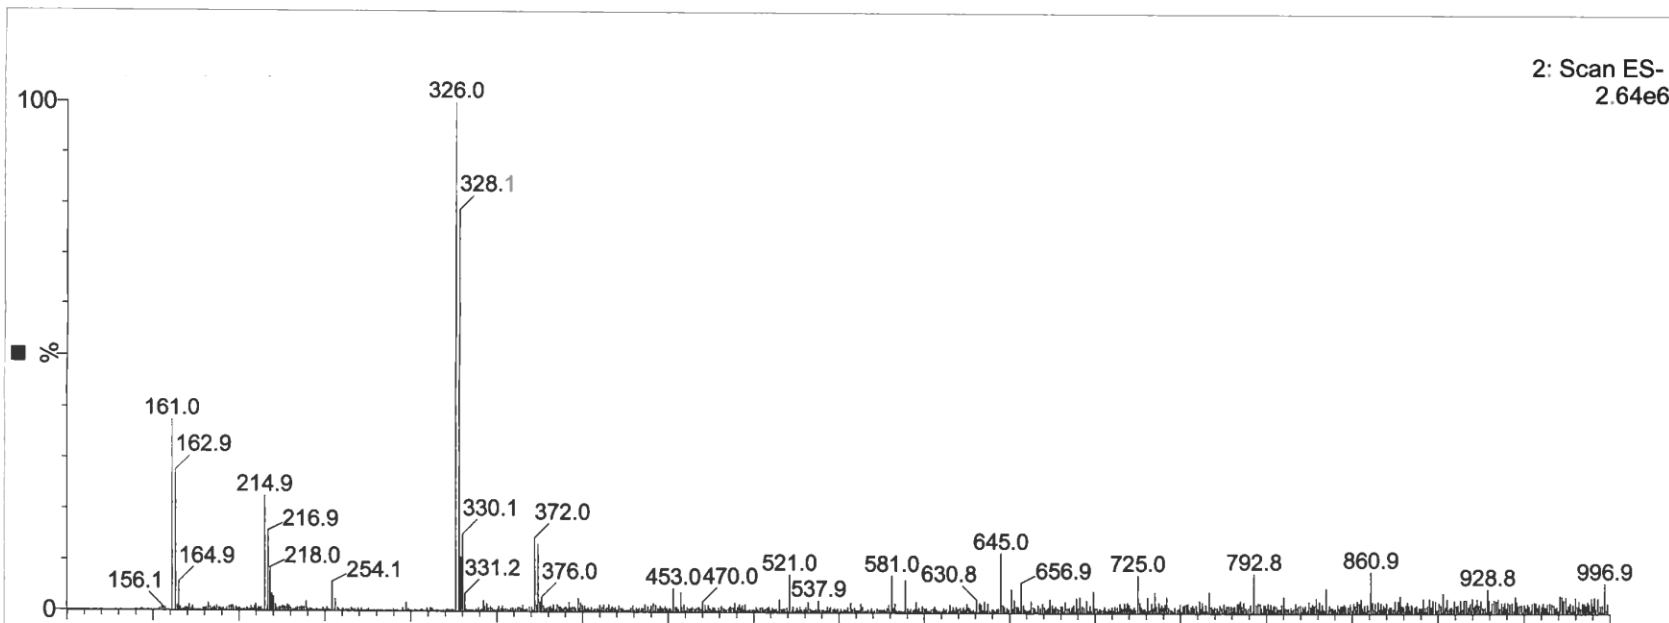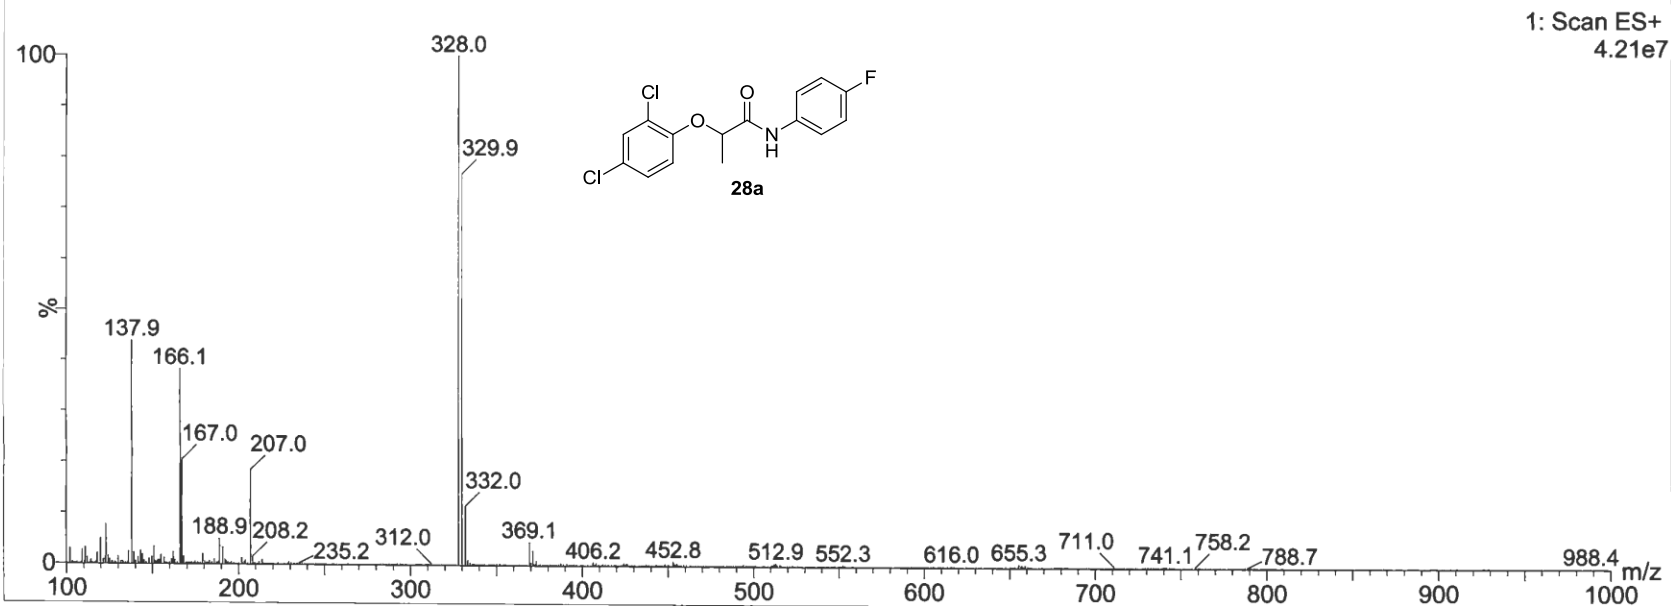

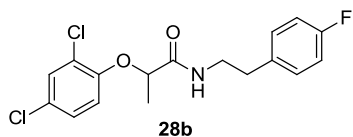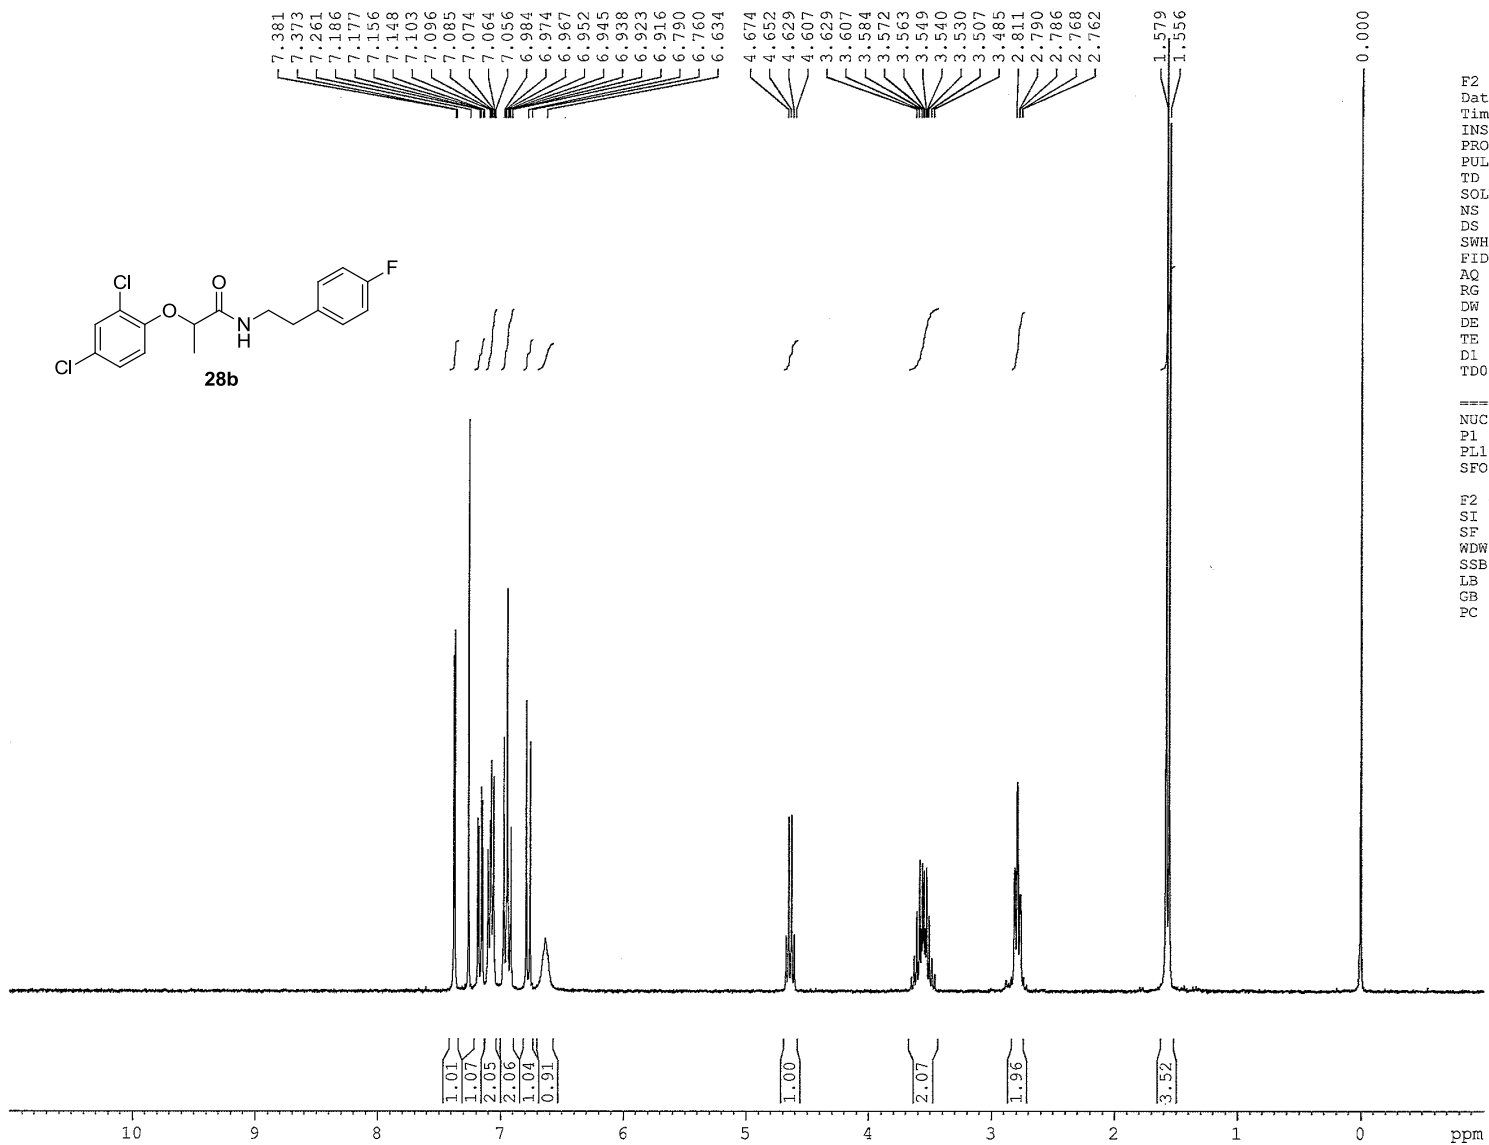

F2 - Acquisition Parameters  
 Date\_ 20111114  
 Time 10.35  
 INSTRUM spect  
 PROBHD 5 mm BBO BB-1H  
 PULPROG zg30  
 TD 65536  
 SOLVENT CDCl3  
 NS 16  
 DS 2  
 SWH 6172.839 Hz  
 FIDRES 0.094190 Hz  
 AQ 5.3084660 sec  
 RG 2048  
 DW 81.000 usec  
 DE 6.50 usec  
 TE 298.2 K  
 D1 1.00000000 sec  
 TD0 1

===== CHANNEL f1 =====  
 NUC1 1H  
 P1 10.00 usec  
 PL1 9.20 dB  
 SFO1 299.5018495 MHz

F2 - Processing parameters  
 SI 32768  
 SF 299.5000054 MHz  
 WDW EM  
 SSB 0  
 LB 0.30 Hz  
 GB 0  
 PC 1.00

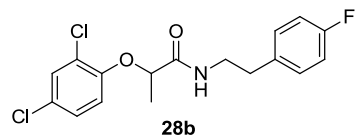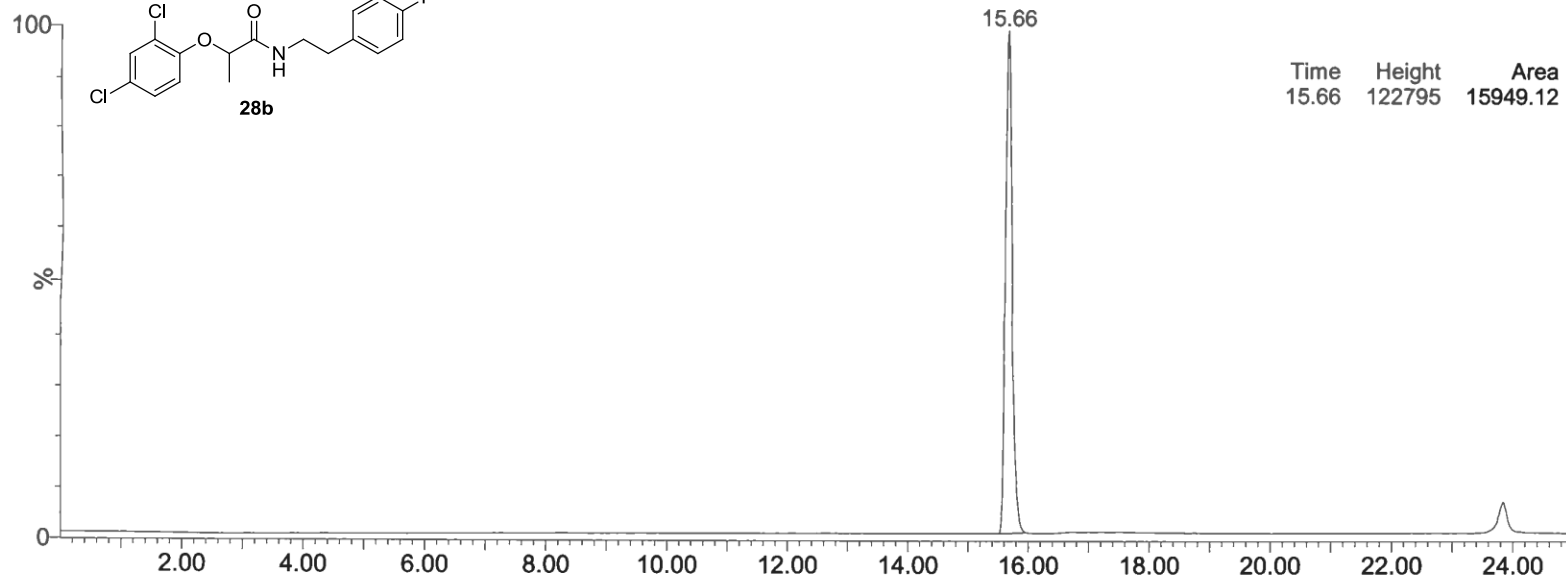

| ELSD  |        |          |        |
|-------|--------|----------|--------|
| An2   |        |          |        |
| Time  | Height | Area     | Area%  |
| 15.66 | 122795 | 15949.12 | 100.00 |

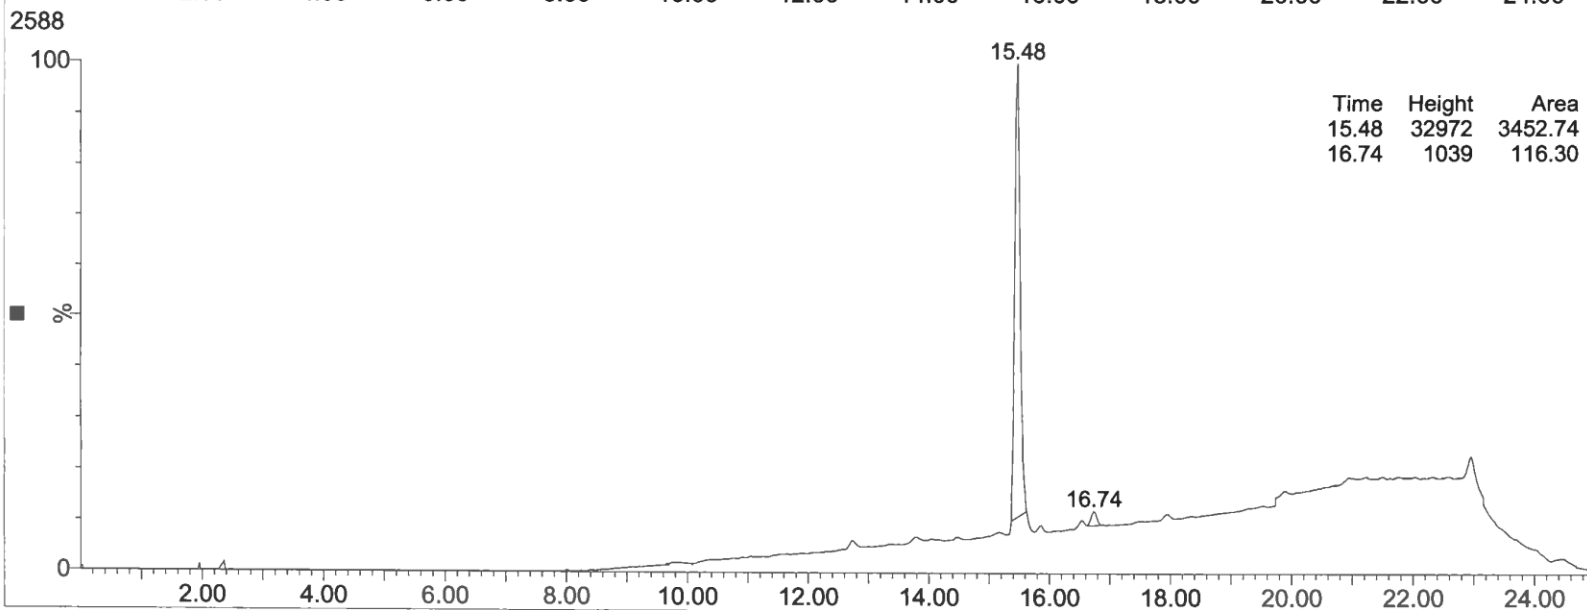

| UV    |        |         |       |
|-------|--------|---------|-------|
| An1   |        |         |       |
| Time  | Height | Area    | Area% |
| 15.48 | 32972  | 3452.74 | 96.74 |
| 16.74 | 1039   | 116.30  | 3.26  |

1: Scan ES+  
6.10e7

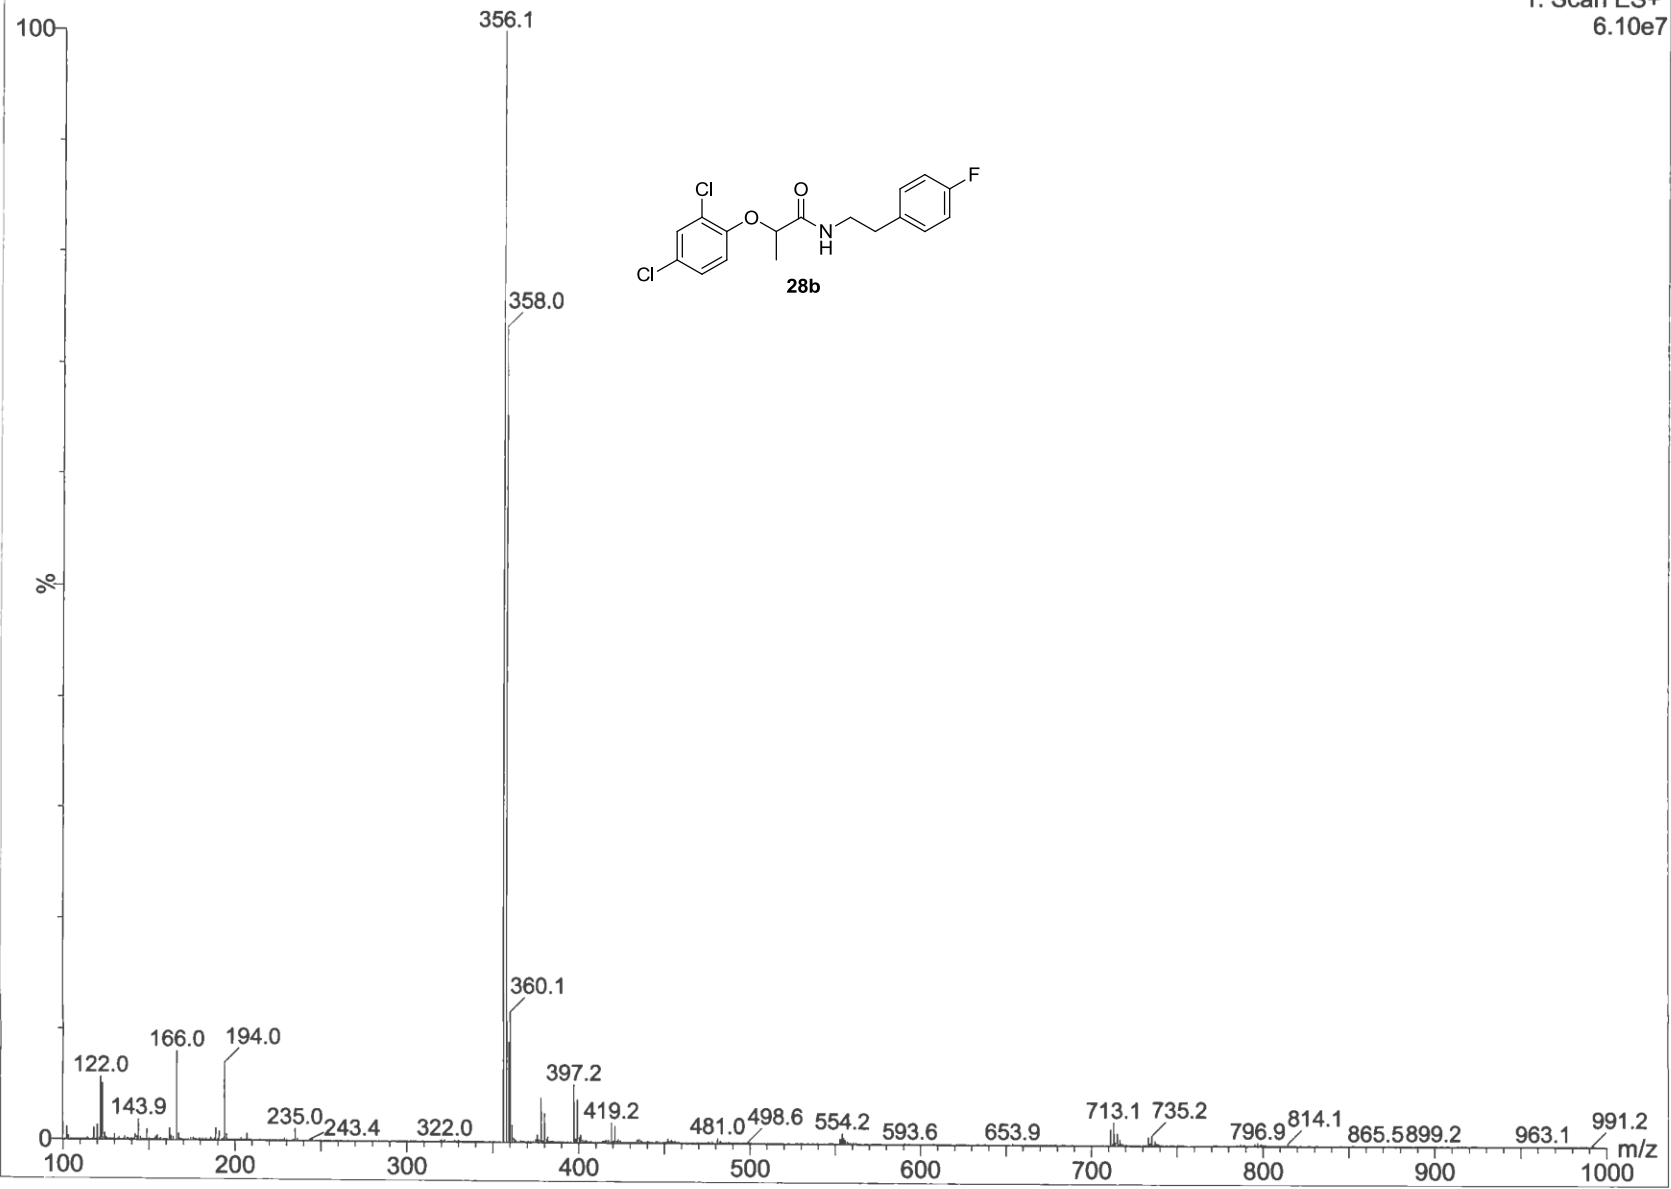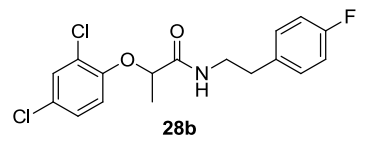

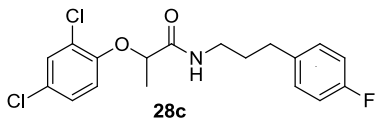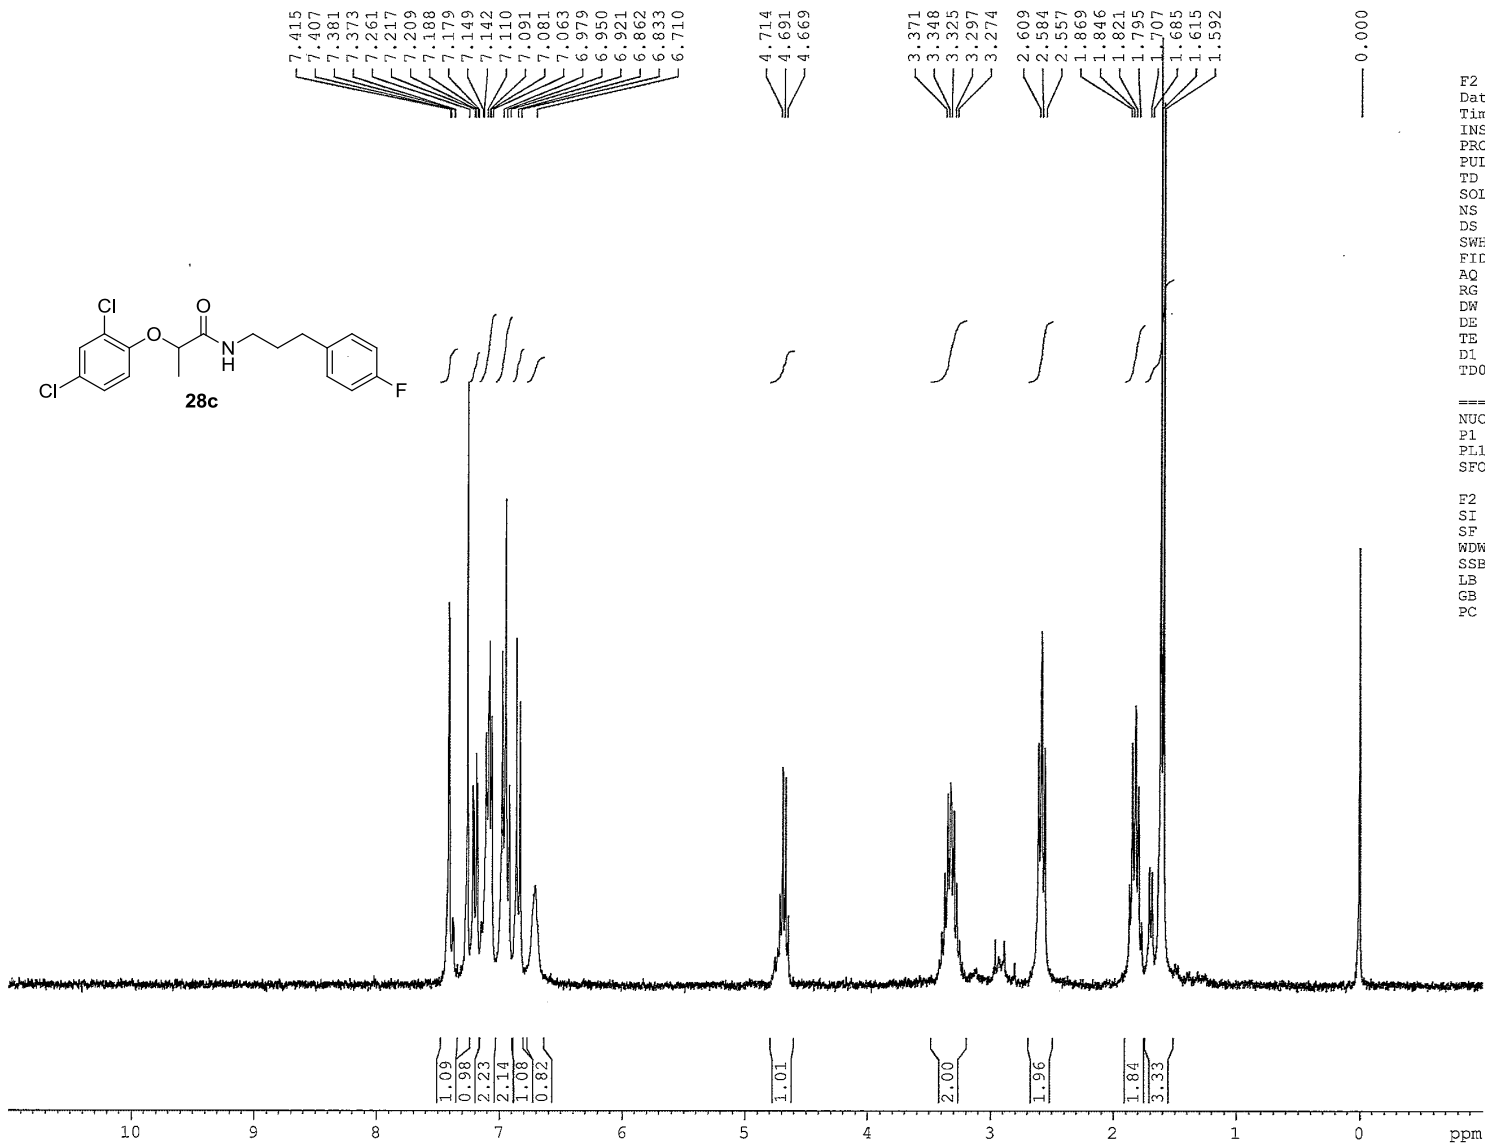

F2 - Acquisition Parameters  
 Date\_ 20120123  
 Time\_ 10.57  
 INSTRUM spect  
 PROBHD 5 mm BBO BB-1H  
 PULPROG zg30  
 TD 65536  
 SOLVENT CDCl3  
 NS 16  
 DS 2  
 SWH 6172.839 Hz  
 FIDRES 0.094190 Hz  
 AQ 5.3084660 sec  
 RG 2580.3  
 DW 81.000 usec  
 DE 6.50 usec  
 TE 298.2 K  
 D1 1.0000000 sec  
 TDO 1

===== CHANNEL f1 =====  
 NUC1 1H  
 PL 10.00 usec  
 PL1 9.20 dB  
 SFO1 299.5018495 MHz

F2 - Processing parameters  
 SI 32768  
 SF 299.5000054 MHz  
 WDW EM  
 SSB 0  
 LB 0.30 Hz  
 GB 0  
 PC 1.00

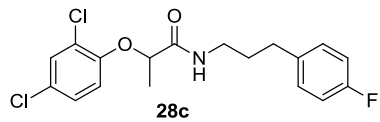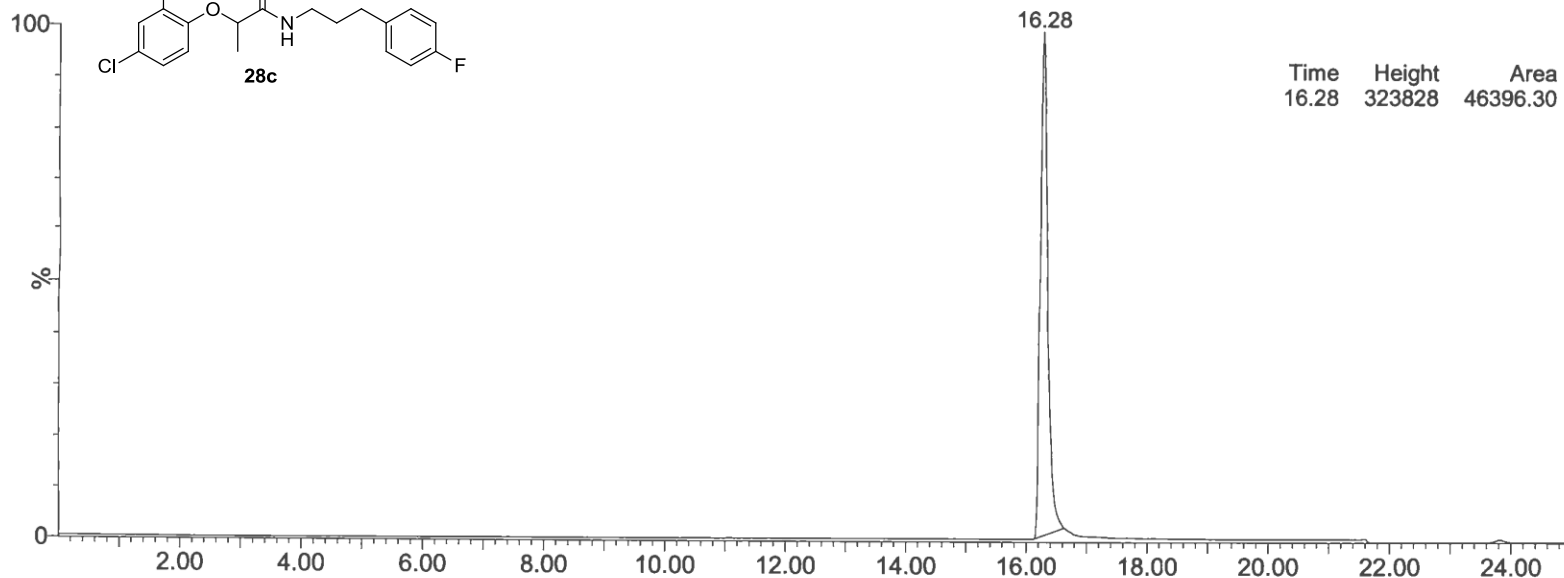

ELSD  
An2  
3.28e5

| Time  | Height | Area     | Area%  |
|-------|--------|----------|--------|
| 16.28 | 323828 | 46396.30 | 100.00 |

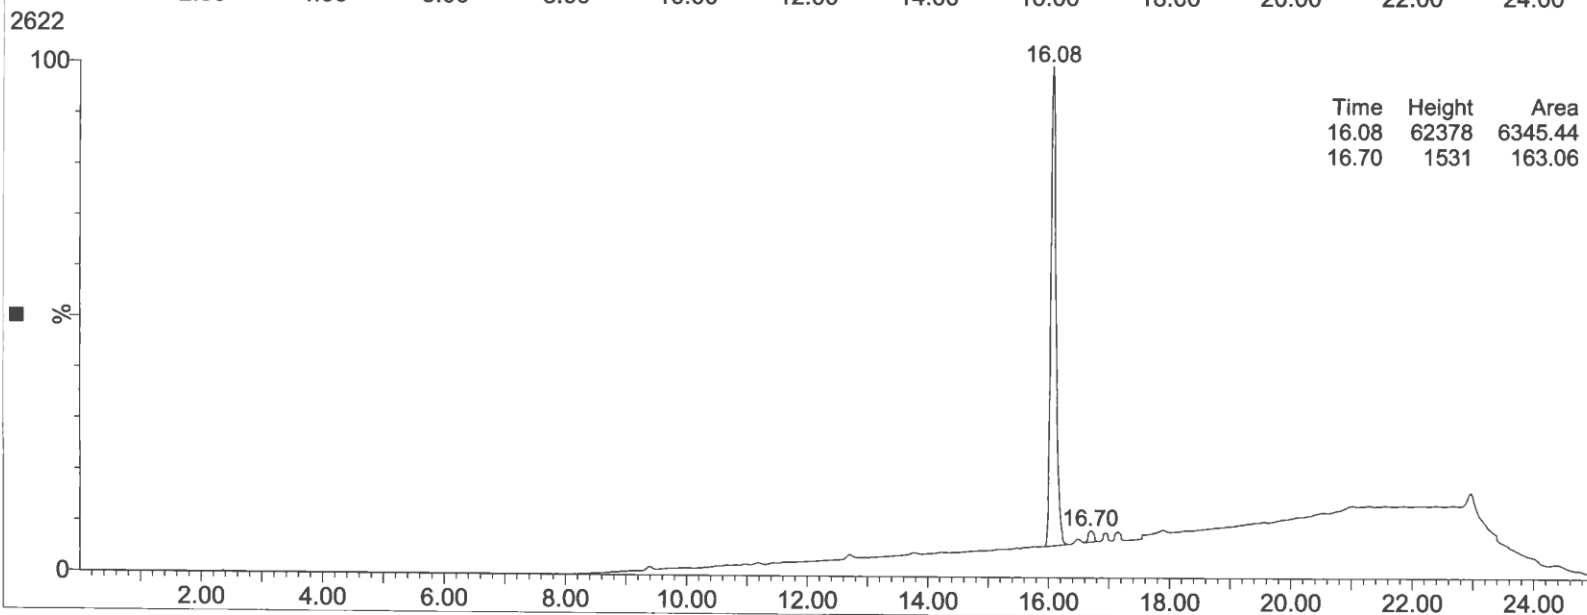

UV  
An1  
6.64e4

| Time  | Height | Area    | Area% |
|-------|--------|---------|-------|
| 16.08 | 62378  | 6345.44 | 97.49 |
| 16.70 | 1531   | 163.06  | 2.51  |

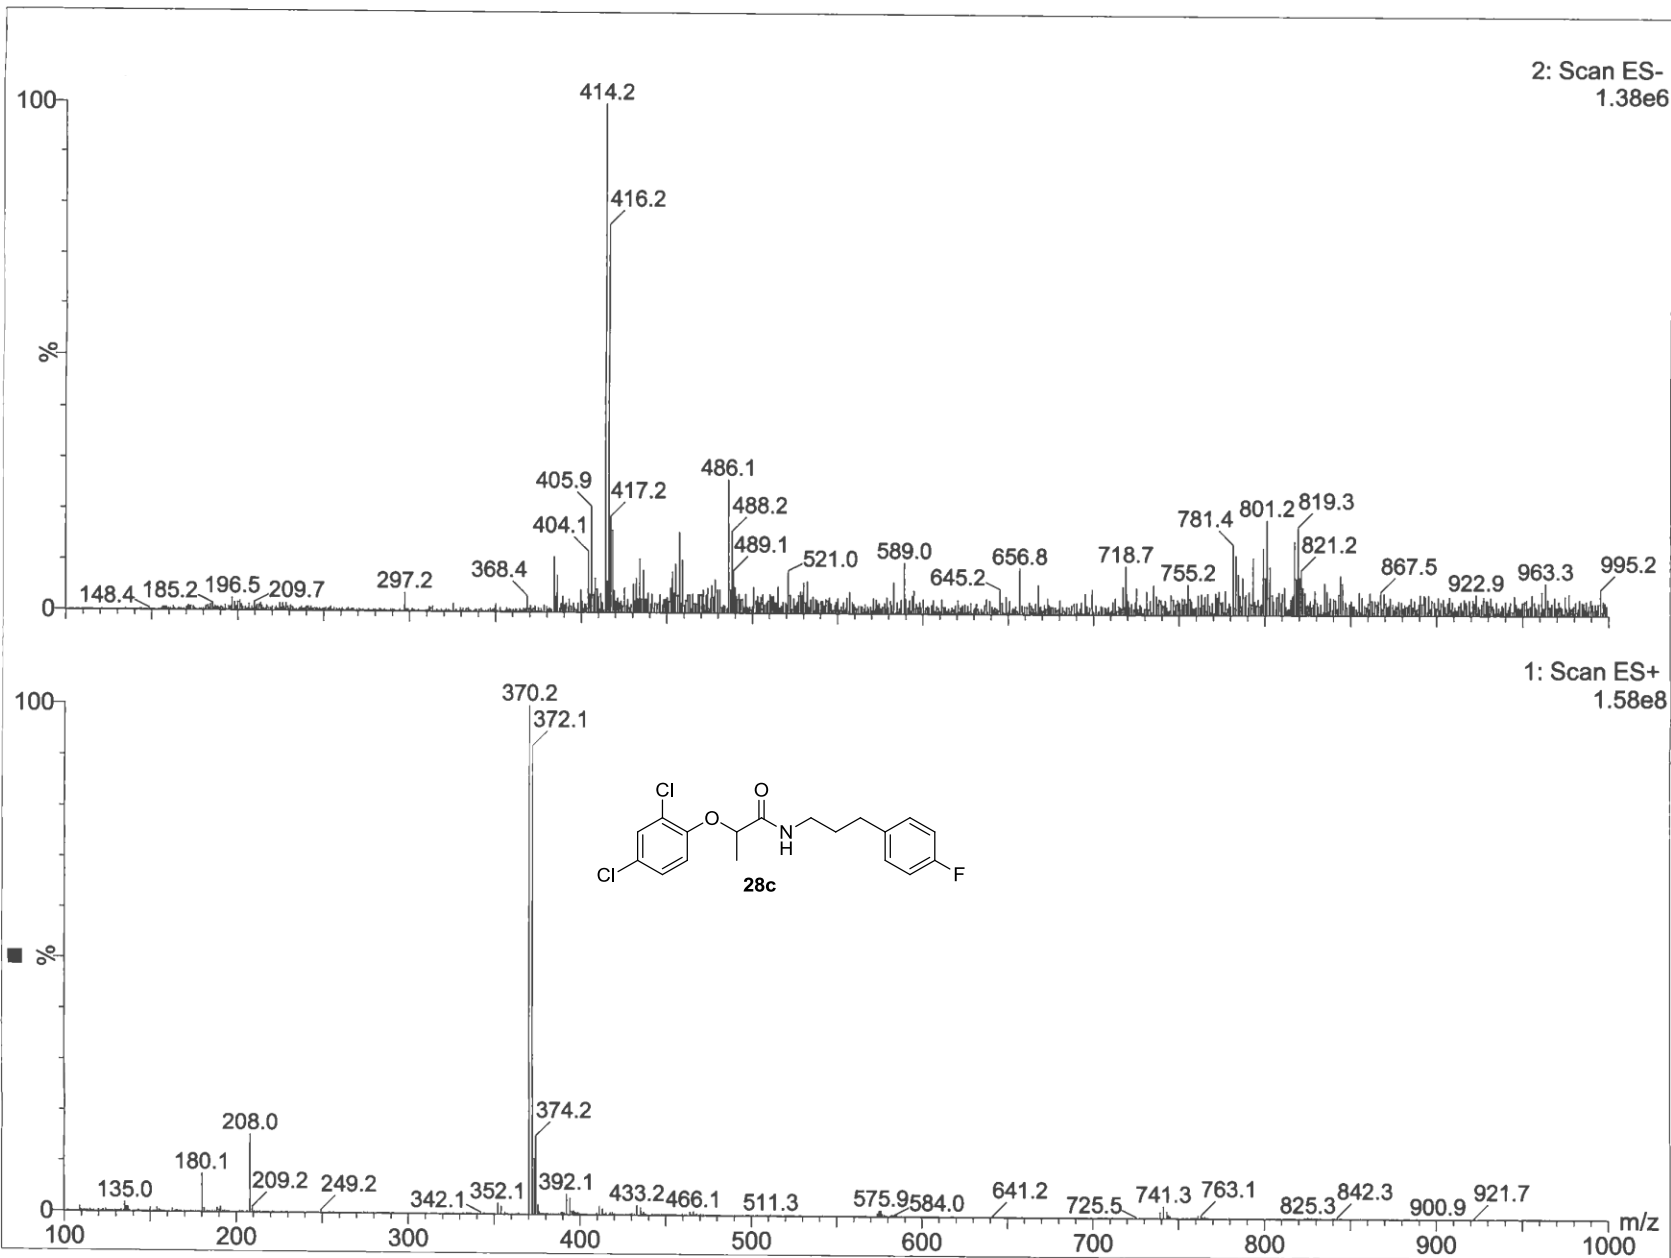



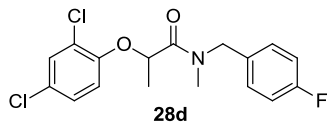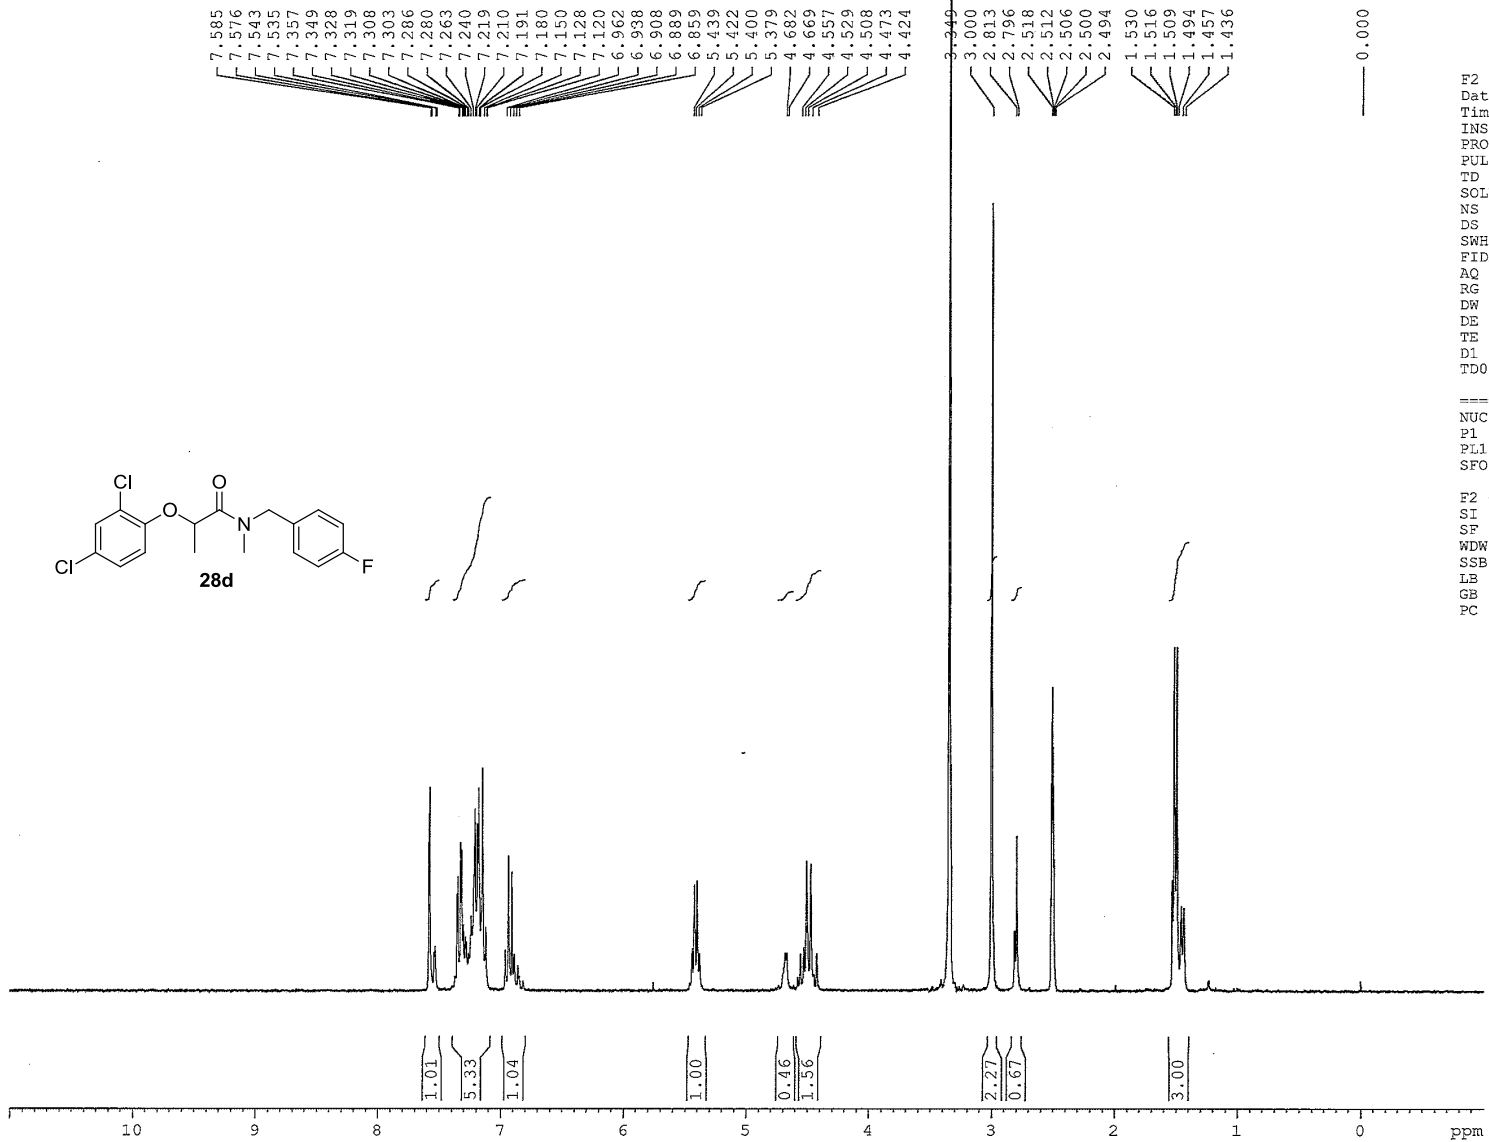

F2 - Acquisition Parameters  
 Date\_ 20141226  
 Time 13.20  
 INSTRUM spect  
 PROBHD 5 mm BBO BB-1H  
 PULPROG zg30  
 TD 65536  
 SOLVENT DMSO  
 NS 16  
 DS 2  
 SWH 6172.839 Hz  
 FIDRES 0.094190 Hz  
 AQ 5.3084660 sec  
 RG 1290.2  
 DW 81.000 usec  
 DE 6.50 usec  
 TE 298.2 K  
 D1 1.00000000 sec  
 TDO 1

===== CHANNEL f1 =====  
 NUC1 1H  
 P1 10.00 usec  
 PL1 3.00 dB  
 SF01 299.3952489 MHz

F2 - Processing parameters  
 SI 32768  
 SF 299.3933983 MHz  
 WDW EM  
 SSB 0  
 LB 0.30 Hz  
 GB 0  
 PC 1.00

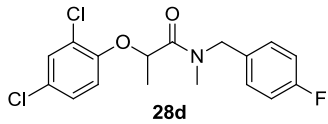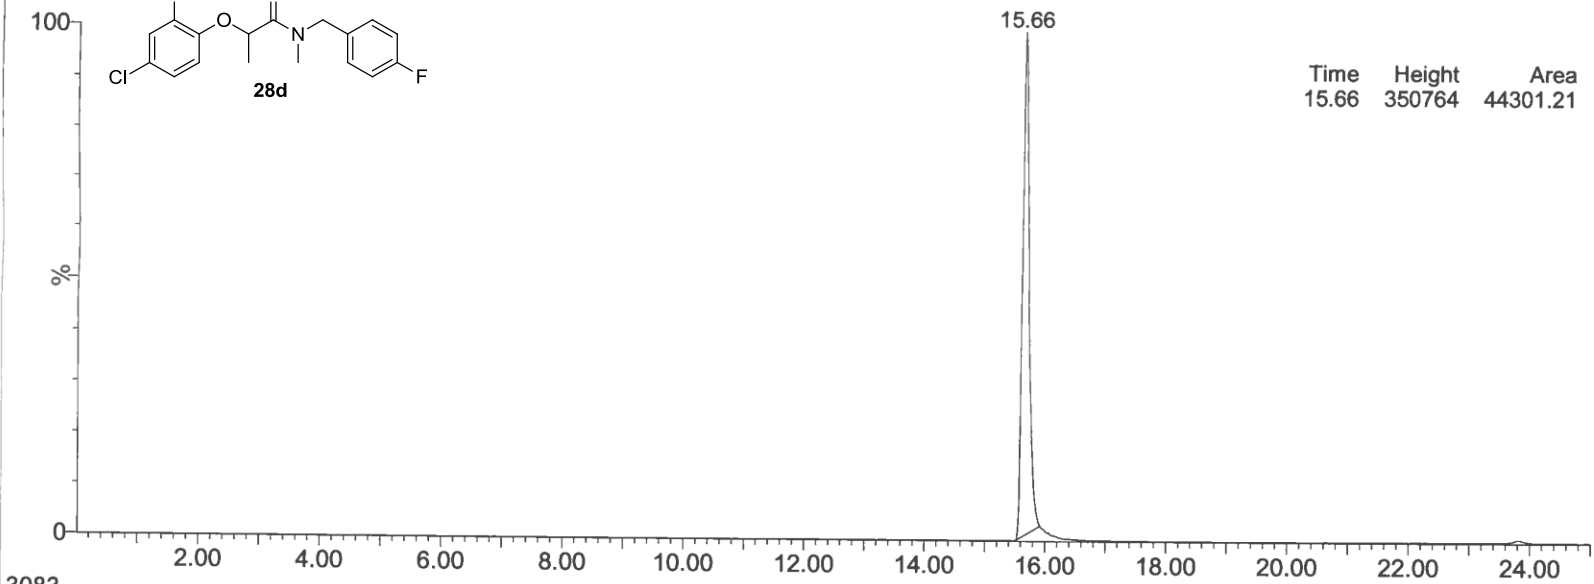

ELSD  
An2  
3.55e5

| Time  | Height | Area     | Area%  |
|-------|--------|----------|--------|
| 15.66 | 350764 | 44301.21 | 100.00 |

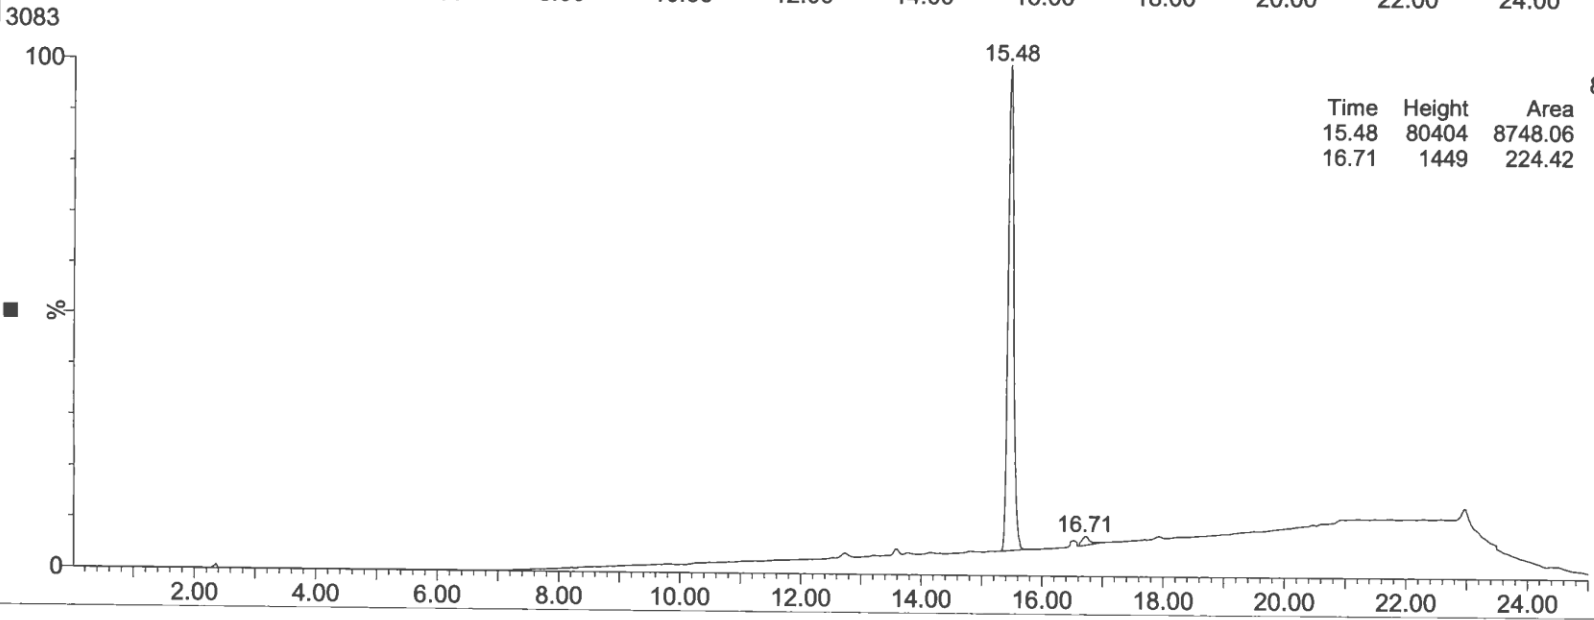

UV  
An1  
8.45e4

| Time  | Height | Area    | Area% |
|-------|--------|---------|-------|
| 15.48 | 80404  | 8748.06 | 97.50 |
| 16.71 | 1449   | 224.42  | 2.50  |

1: Scan ES+  
8.23e7

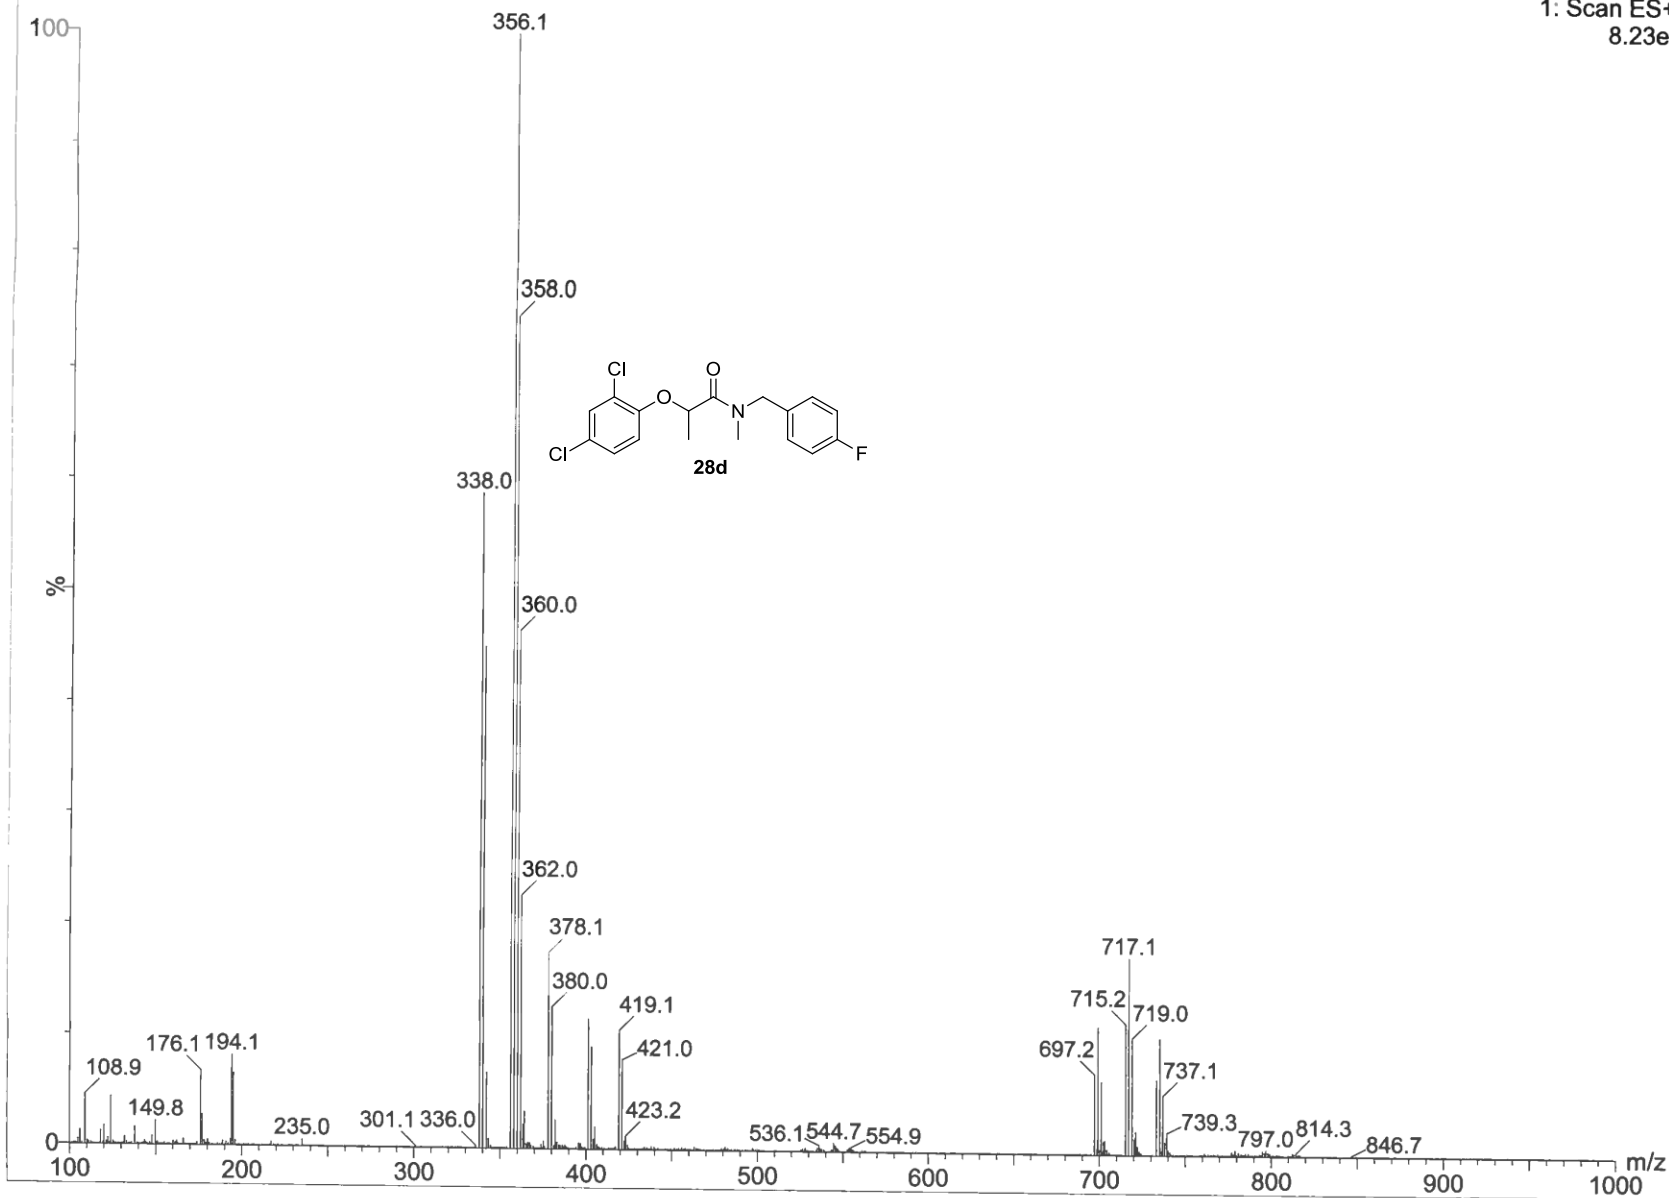

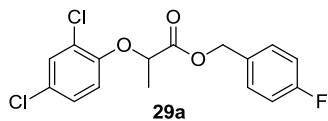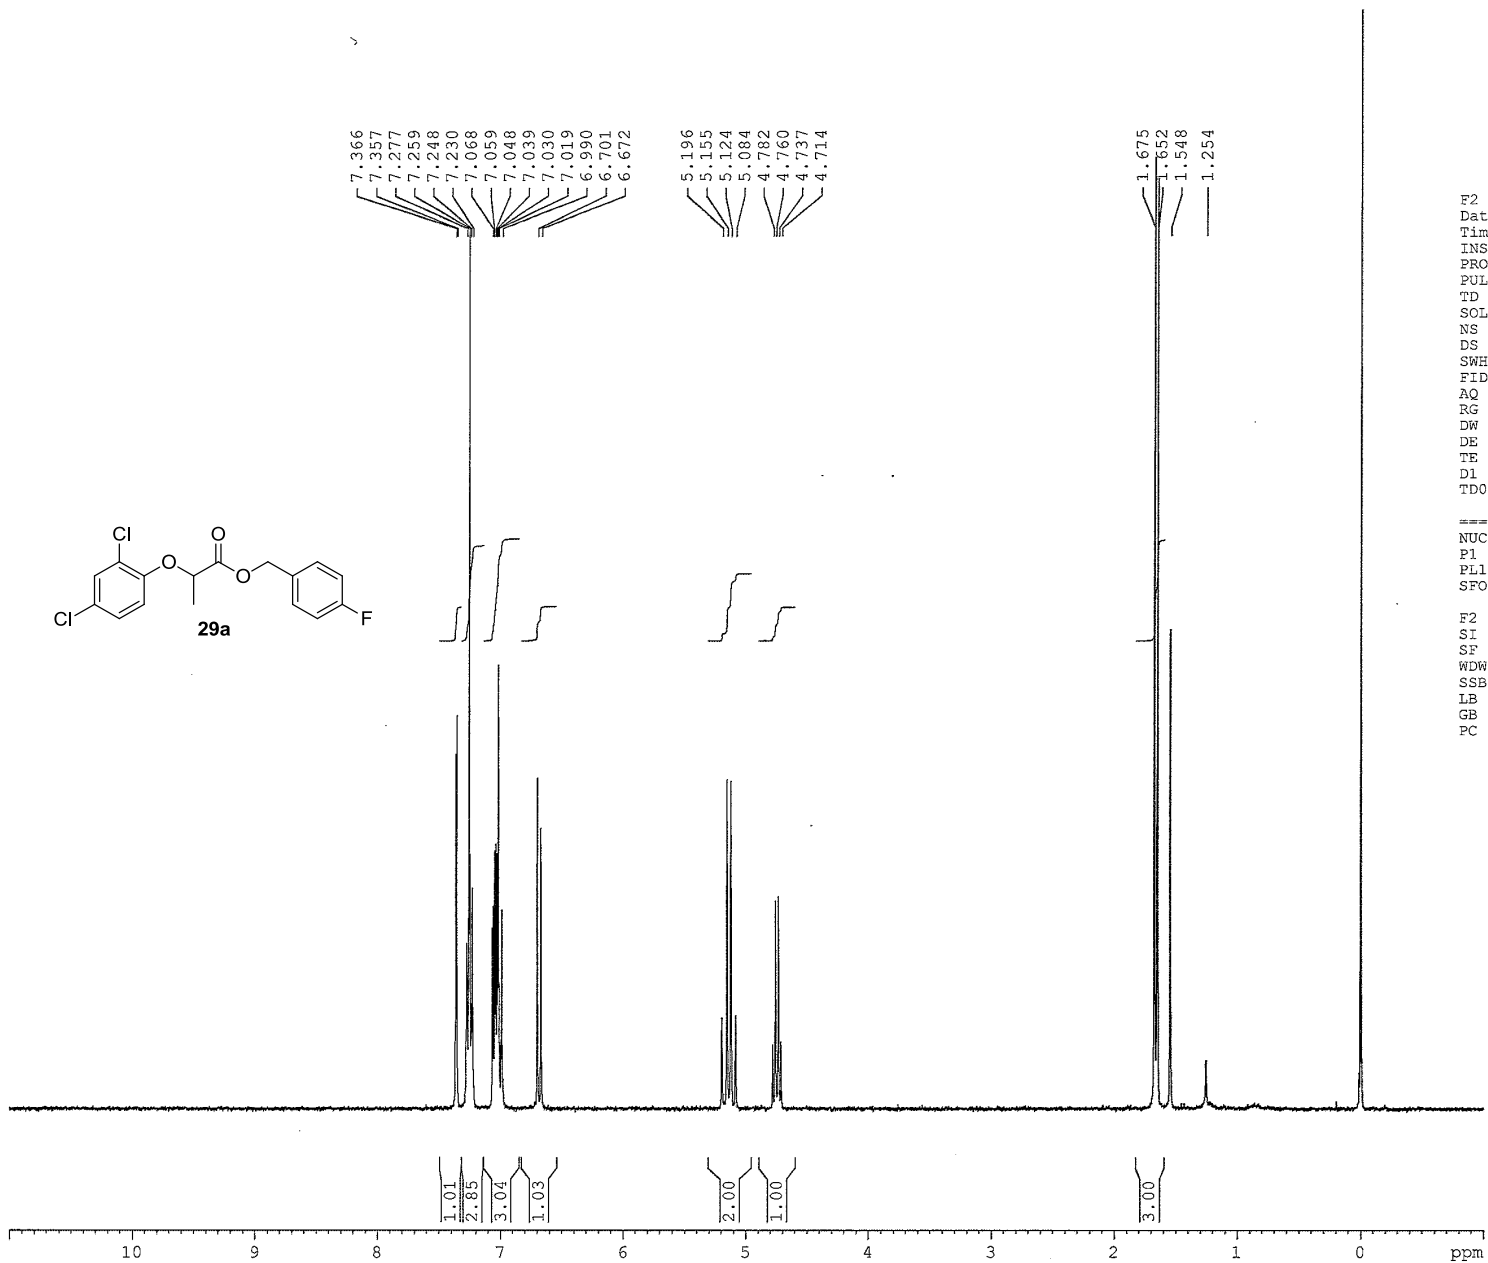

F2 - Acquisition Parameters  
 Date\_ 20130816  
 Time\_ 15.12  
 INSTRUM spect  
 PROBHD 5 mm BBO BB-1H  
 PULPROG zg30  
 TD 65536  
 SOLVENT CDCl3  
 NS 16  
 DS 2  
 SWH 6172.839 Hz  
 FIDRES 0.094190 Hz  
 AQ 5.3084660 sec  
 RG 2896.3  
 DW 81.000 usec  
 DE 6.50 usec  
 TE 298.2 K  
 D1 1.00000000 sec  
 TD0 1

===== CHANNEL f1 =====  
 NUC1 1H  
 P1 10.00 usec  
 PL1 3.00 dB  
 SFO1 299.4518492 MHz

F2 - Processing parameters  
 SI 32768  
 SF 299.4500082 MHz  
 WDW EM  
 SSB 0  
 LB 0.30 Hz  
 GB 0  
 PC 1.00

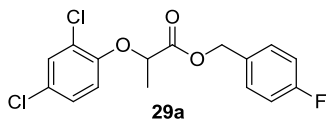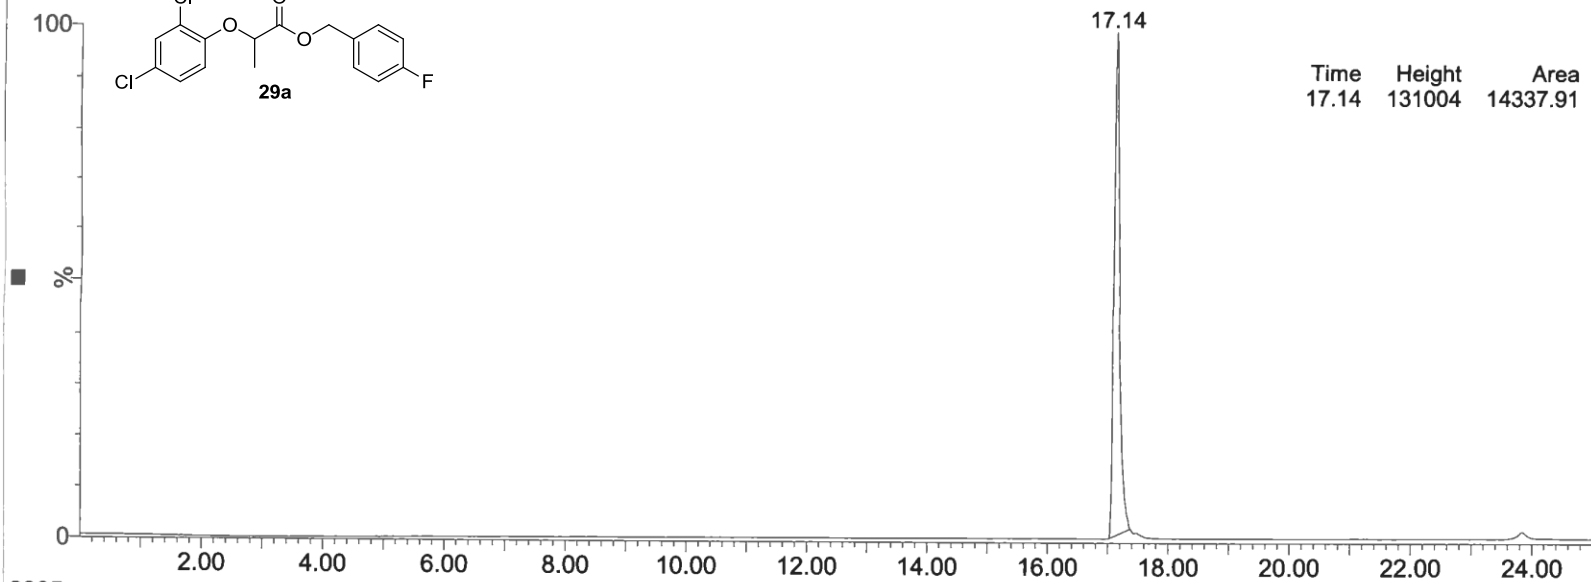

ELSD  
An2  
1.33e5

| Time  | Height | Area     | Area%  |
|-------|--------|----------|--------|
| 17.14 | 131004 | 14337.91 | 100.00 |

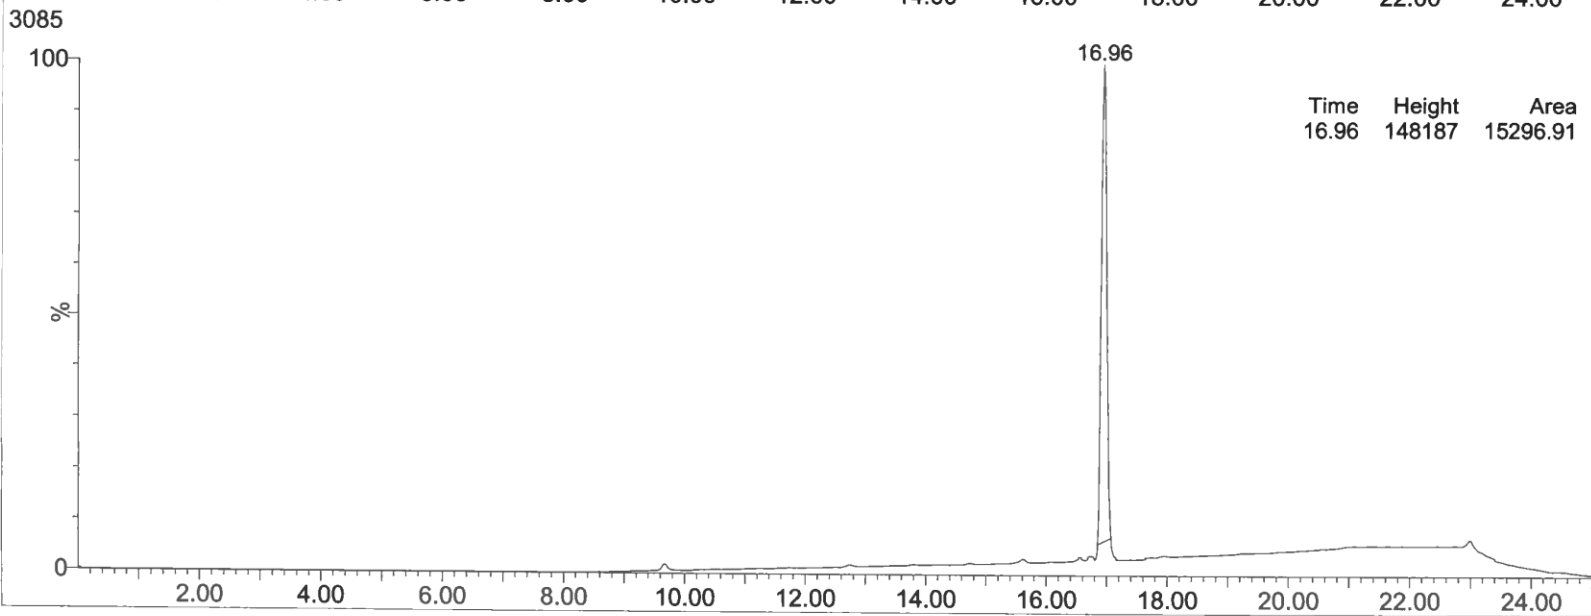

UV  
An1  
1.59e5

| Time  | Height | Area     | Area%  |
|-------|--------|----------|--------|
| 16.96 | 148187 | 15296.91 | 100.00 |

Abundance

3.5e+07

3e+07

2.5e+07

2e+07

1.5e+07

1e+07

5000000

0

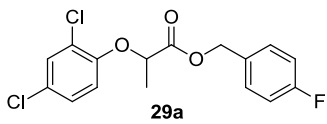

10.032

10.368

Time-->

3.50 4.00 4.50 5.00 5.50 6.00 6.50 7.00 7.50 8.00 8.50 9.00 9.50 10.00 10.50 11.00 11.50 12.00 12.50

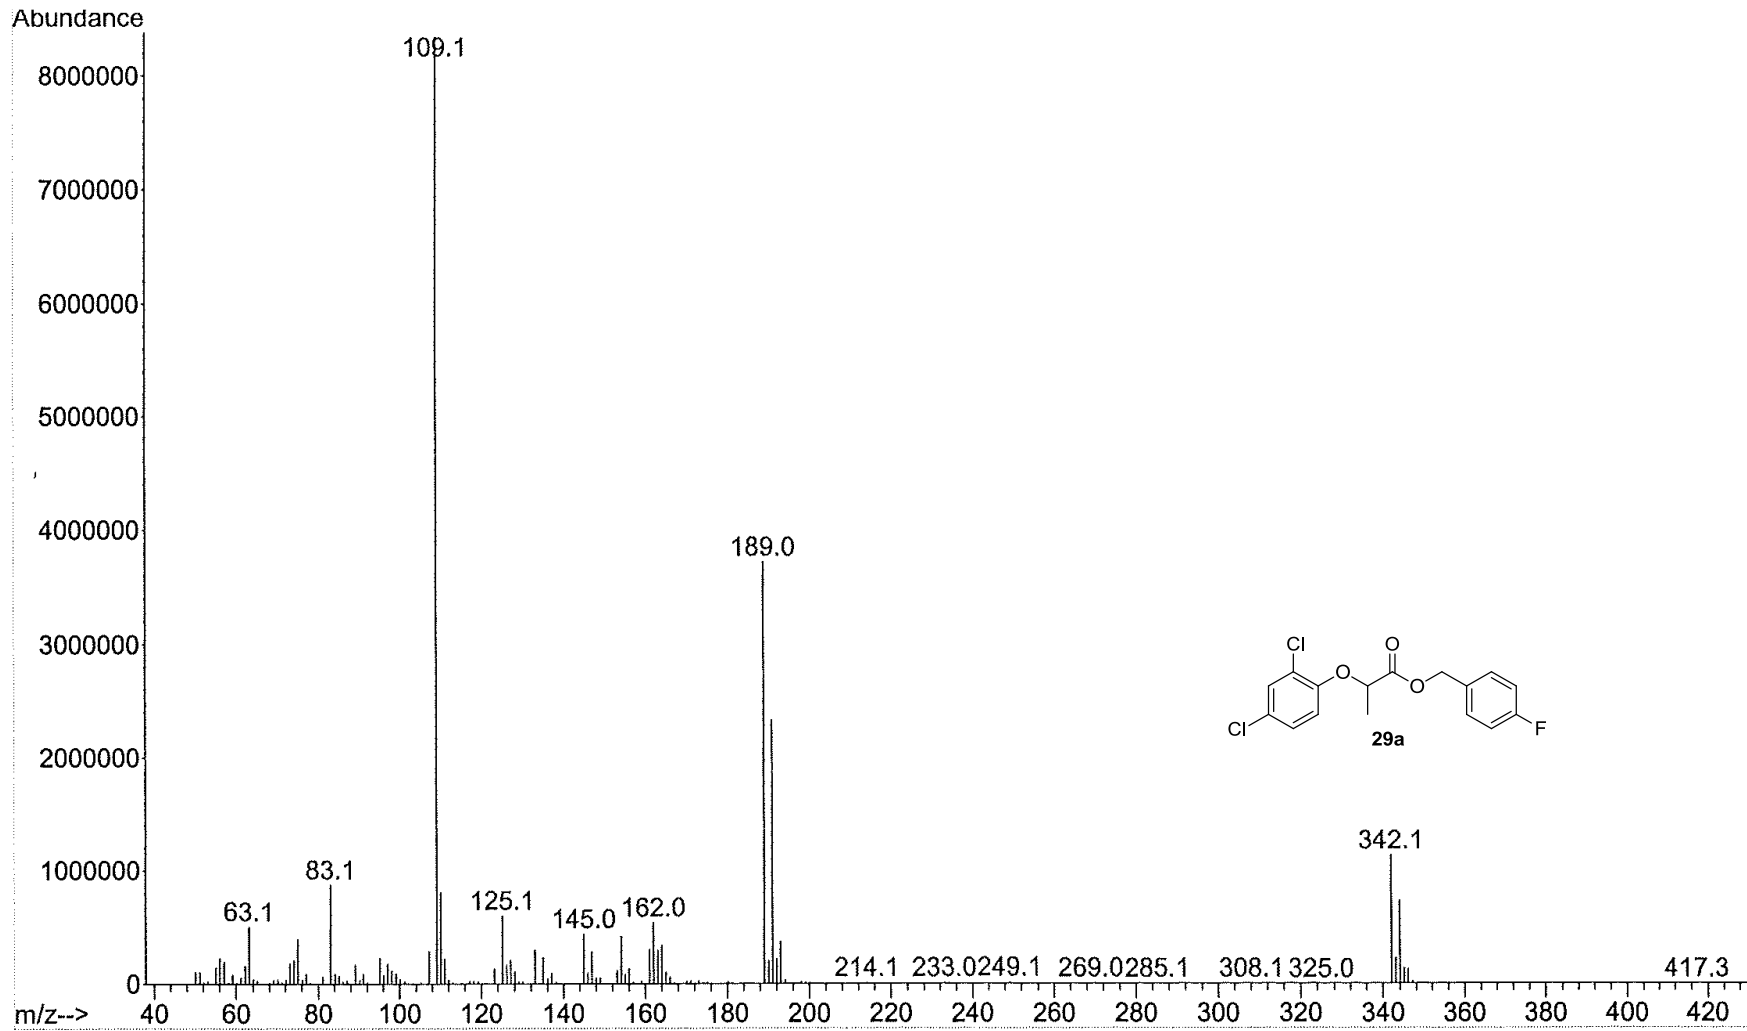

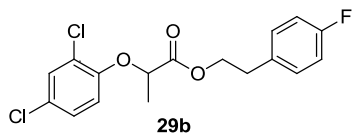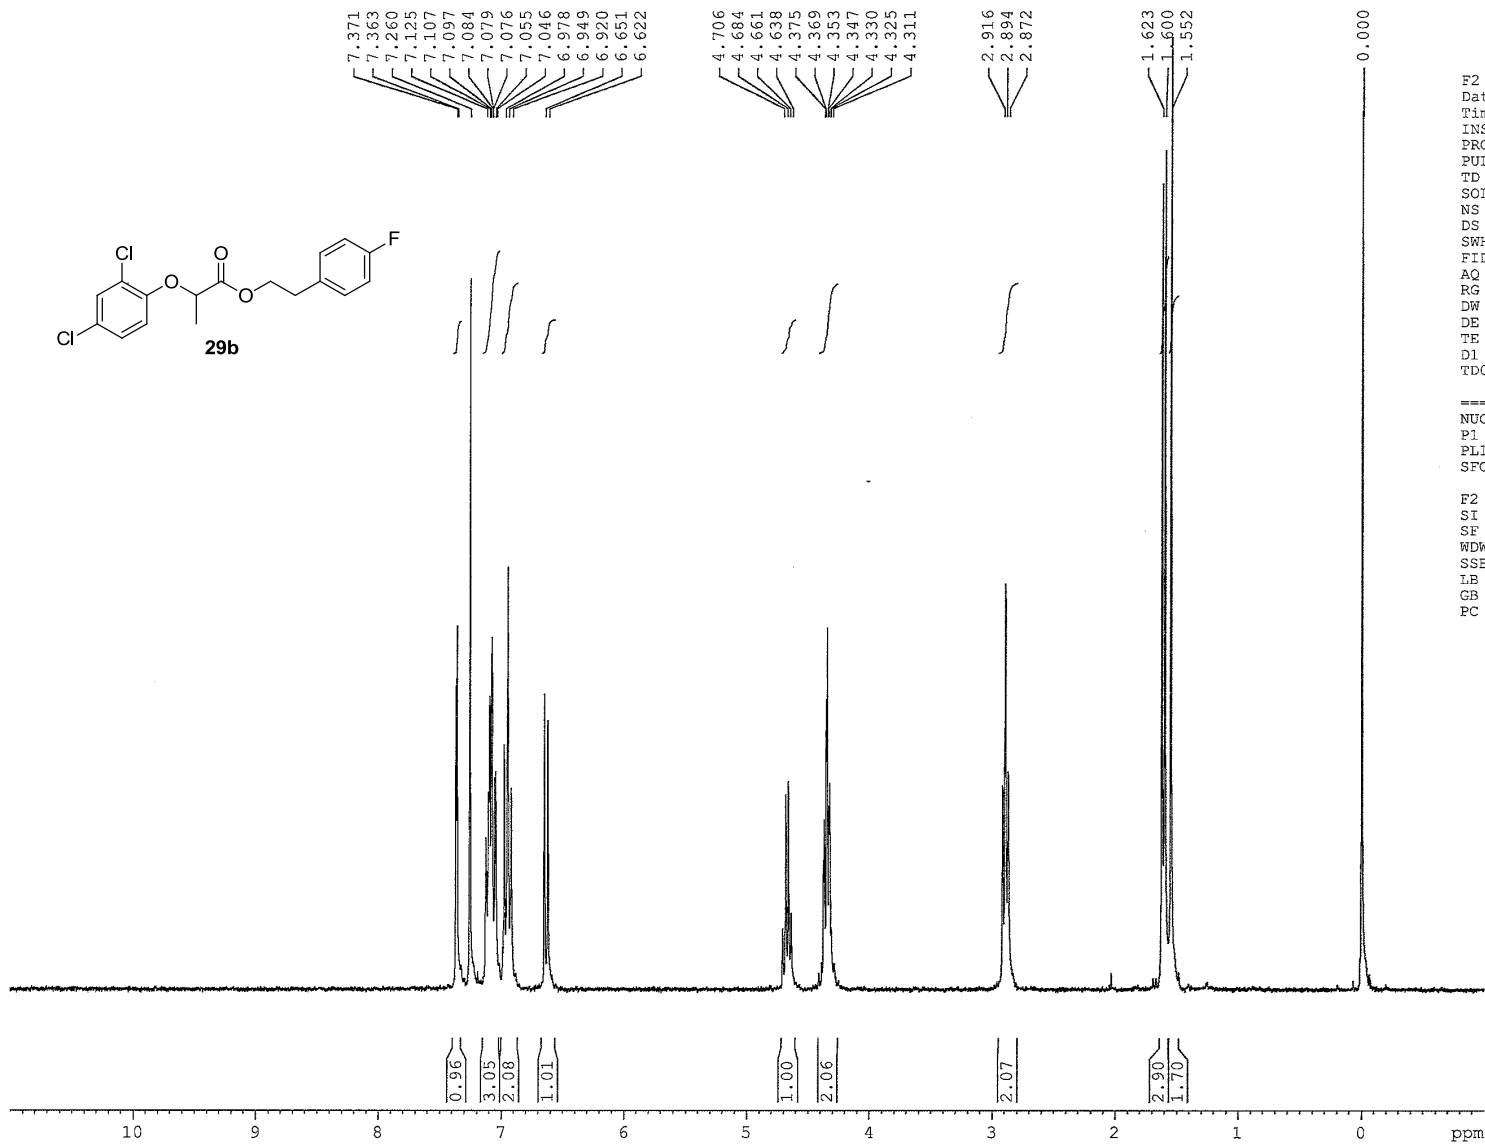

F2 - Acquisition Parameters  
 Date\_ 20120613  
 Time\_ 15.21  
 INSTRUM spect  
 PROBHD 5 mm BBO BB-1H  
 PULPROG zg30  
 TD 65536  
 SOLVENT CDCl3  
 NS 16  
 DS 2  
 SWH 6172.839 Hz  
 FIDRES 0.094190 Hz  
 AQ 5.3084660 sec  
 RG 1625.5  
 DW 81.000 usec  
 DE 6.50 usec  
 TE 298.2 K  
 D1 1.0000000 sec  
 TDO 1

===== CHANNEL f1 =====  
 NUC1 1H  
 P1 10.00 usec  
 PL1 3.00 dB  
 SFO1 299.5018495 MHz

F2 - Processing parameters  
 SI 32768  
 SF 299.5000063 MHz  
 WDW EM  
 SSB 0  
 LB 0.30 Hz  
 GB 0  
 PC 1.00



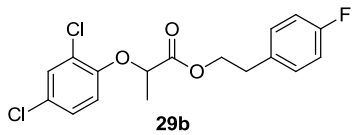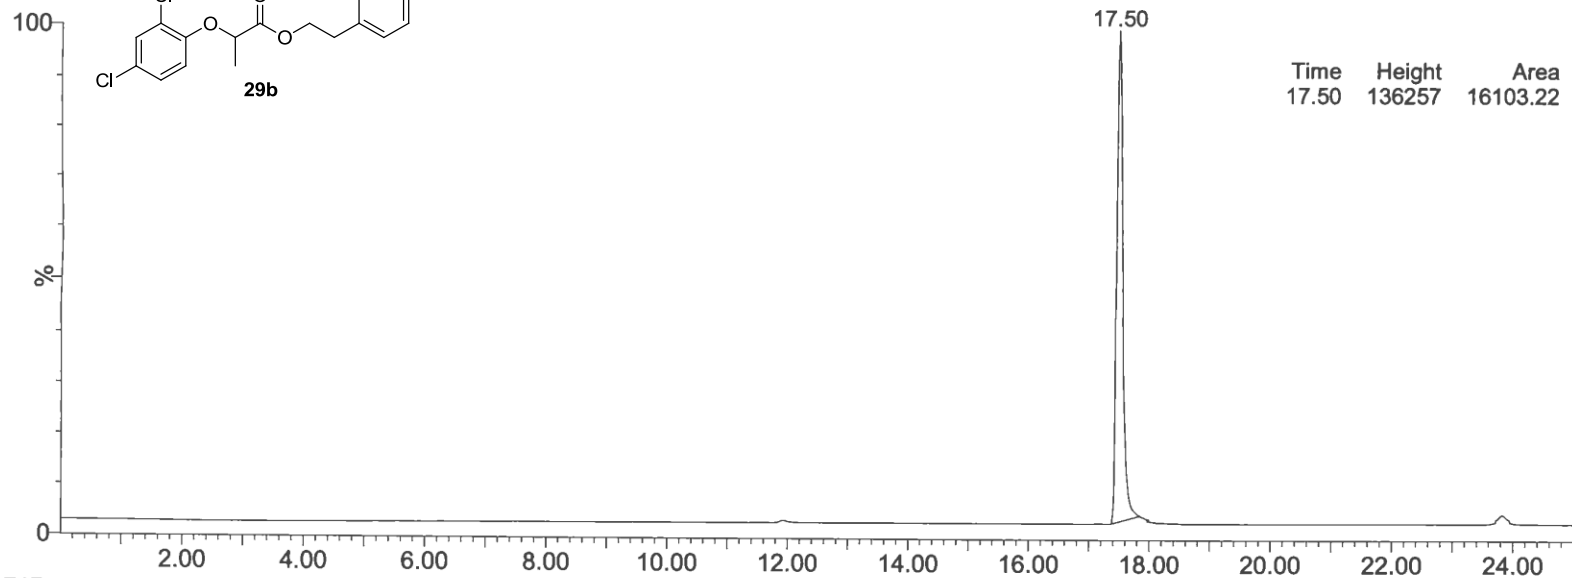

ELSD  
An2  
1.41e5  
Area%

| Time  | Height | Area     | Area%  |
|-------|--------|----------|--------|
| 17.50 | 136257 | 16103.22 | 100.00 |

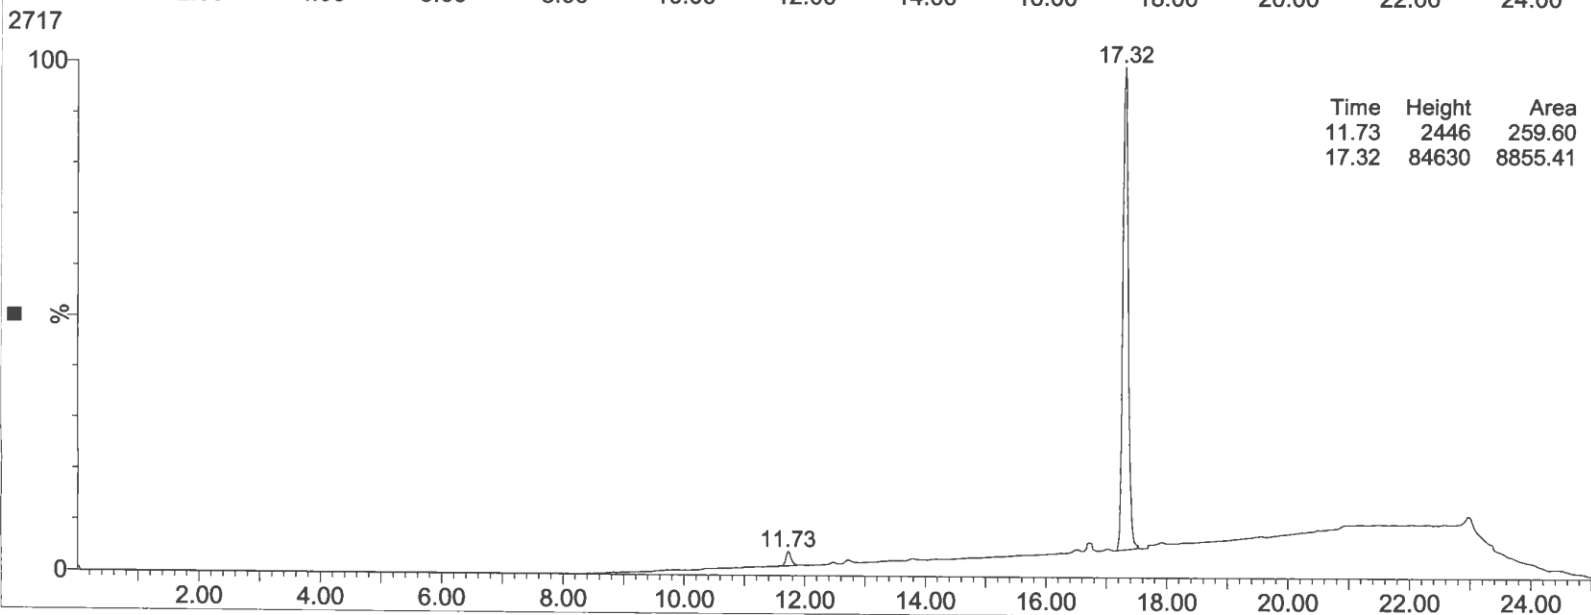

UV  
An1  
8.94e4  
Area%

| Time  | Height | Area    | Area% |
|-------|--------|---------|-------|
| 11.73 | 2446   | 259.60  | 2.85  |
| 17.32 | 84630  | 8855.41 | 97.15 |

Abundance

3.5e+07

3e+07

2.5e+07

2e+07

1.5e+07

1e+07

5000000

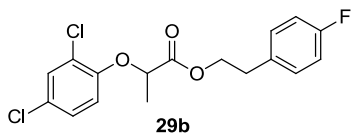

10.416

10.344

Time-->

3.50

4.00

4.50

5.00

5.50

6.00

6.50

7.00

7.50

8.00

8.50

9.00

9.50

10.00

10.50

11.00

11.50

12.00

12.50

Abundance

Average of 10.367 to 10.470 min.: 001011050000000000.D\data.ms

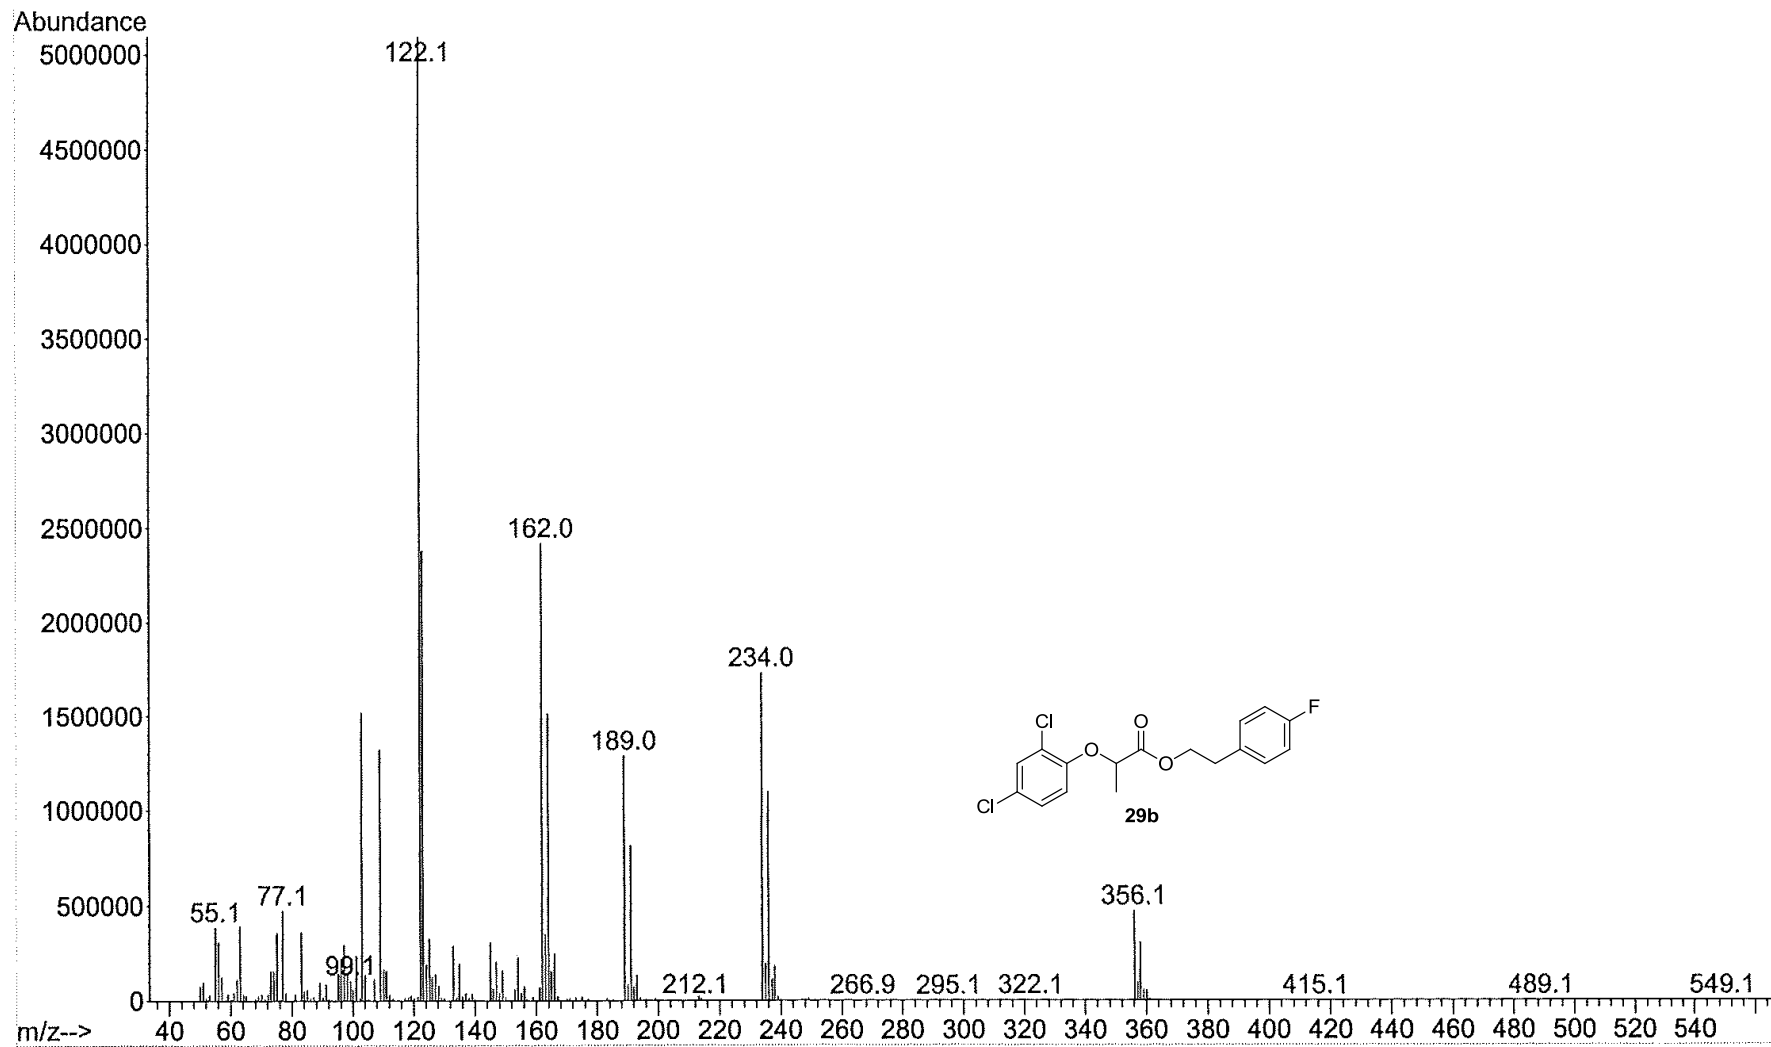

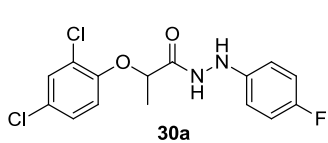

8.401  
8.386  
7.458  
7.450  
7.261  
7.253  
7.245  
7.224  
7.215  
6.955  
6.947  
6.925  
6.917  
6.905  
6.897  
6.888  
6.766  
6.758  
6.751  
6.743  
6.736  
6.729  
6.721  
6.047  
6.031  
4.883  
4.861  
4.838  
4.816

1.687  
1.664  
1.598

0.000

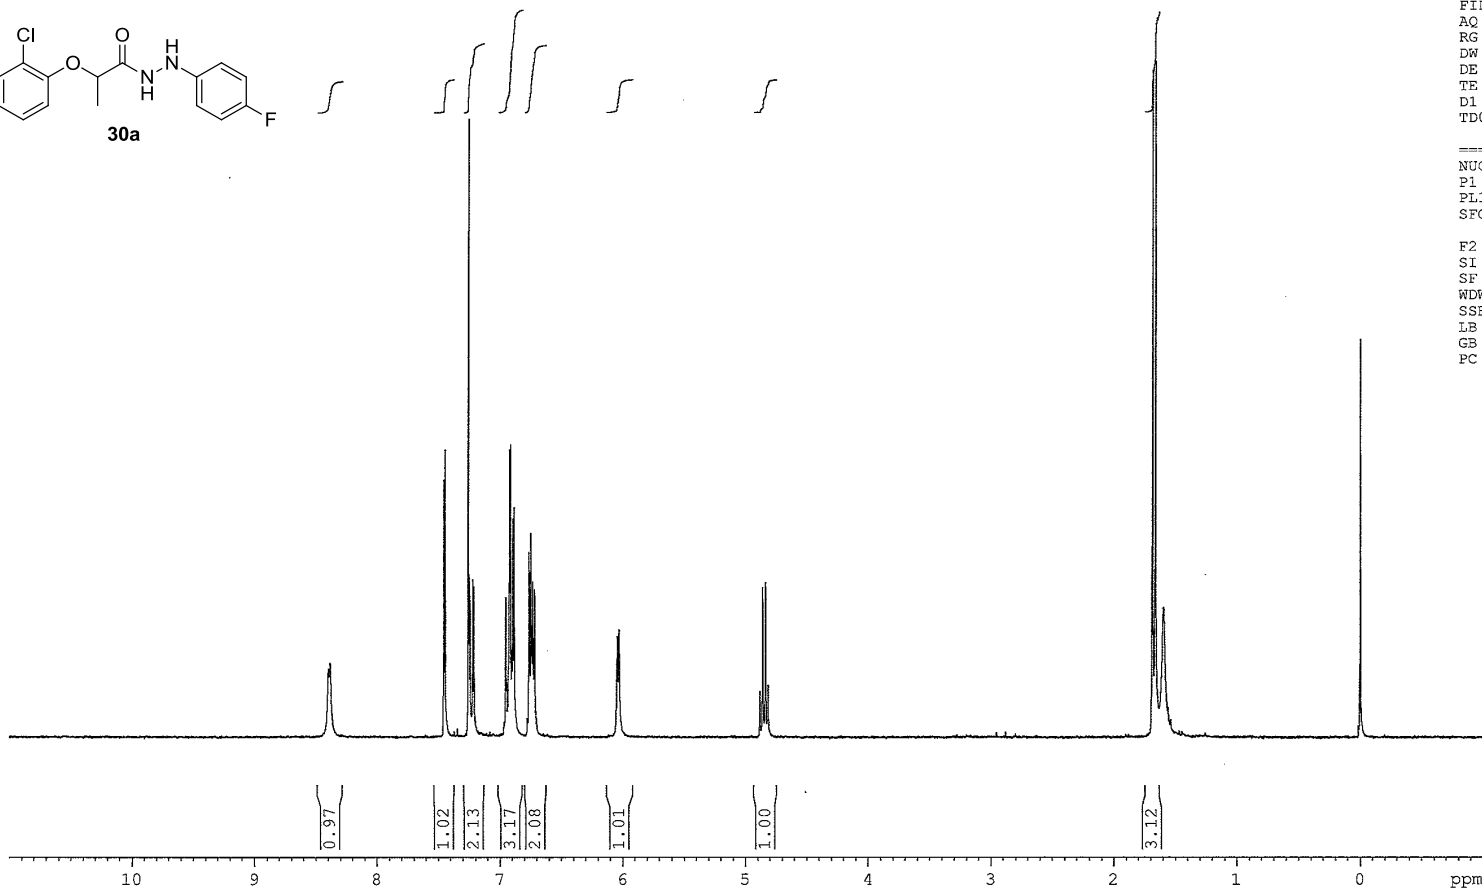

F2 - Acquisition Parameters  
Date\_ 20120717  
Time\_ 14.26  
INSTRUM spect  
PROBHD 5 mm BBO BB-1H  
PULPROG zg30  
TD 65536  
SOLVENT CDCl3  
NS 16  
DS 2  
SWH 6172.839 Hz  
FIDRES 0.094190 Hz  
AQ 5.3084660 sec  
RG 2298.8  
DW 81.000 usec  
DE 6.50 usec  
TE 298.2 K  
D1 1.00000000 sec  
TD0 1

===== CHANNEL f1 =====  
NUC1 1H  
P1 10.00 usec  
PL1 3.00 dB  
SFO1 299.5018495 MHz

F2 - Processing parameters  
SI 32768  
SF 299.5000052 MHz  
WDW EM  
SSB 0  
LB 0.30 Hz  
GB 0  
PC 1.00

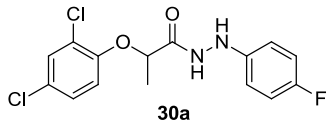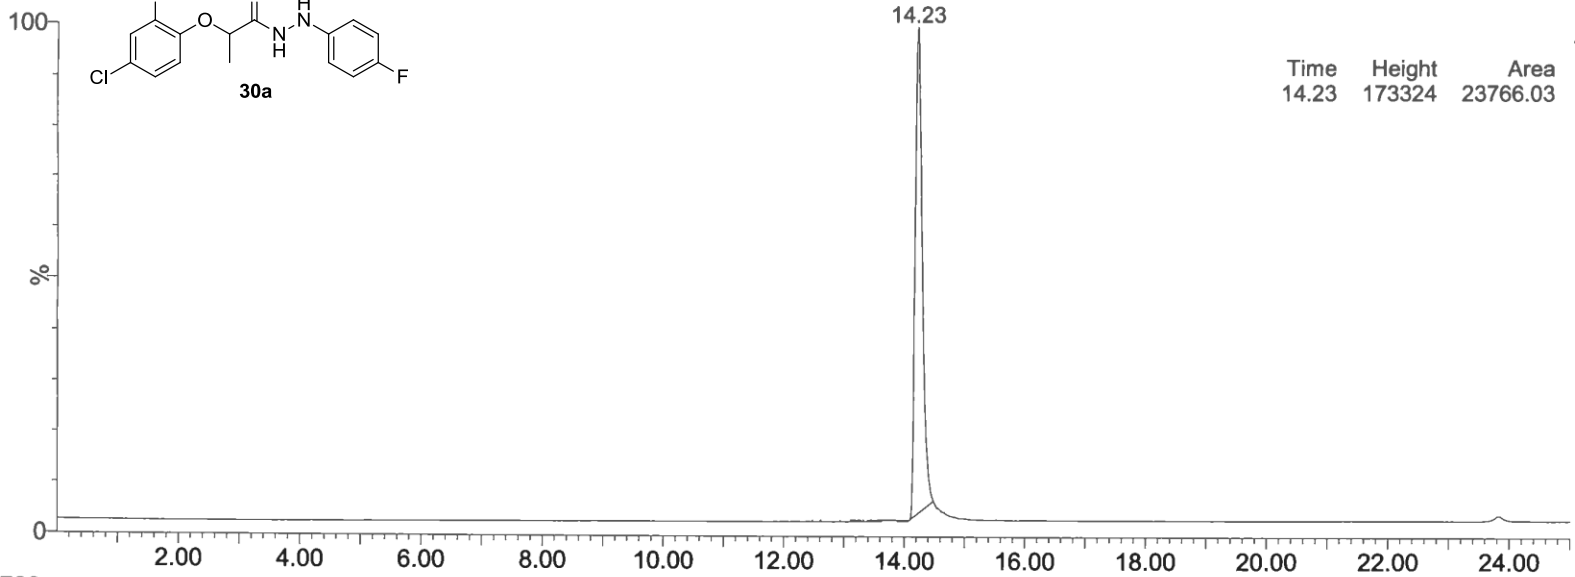

ELSD  
An2  
1.81e5

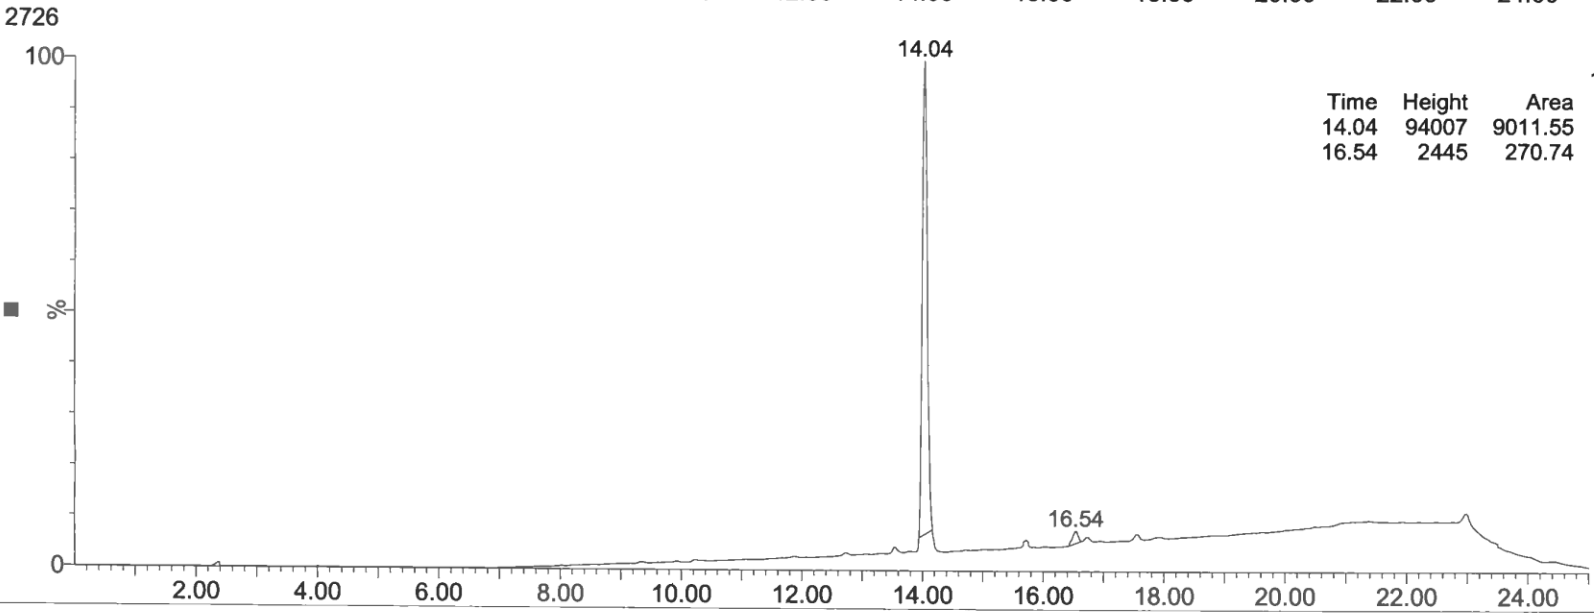

UV  
An1  
1.01e5

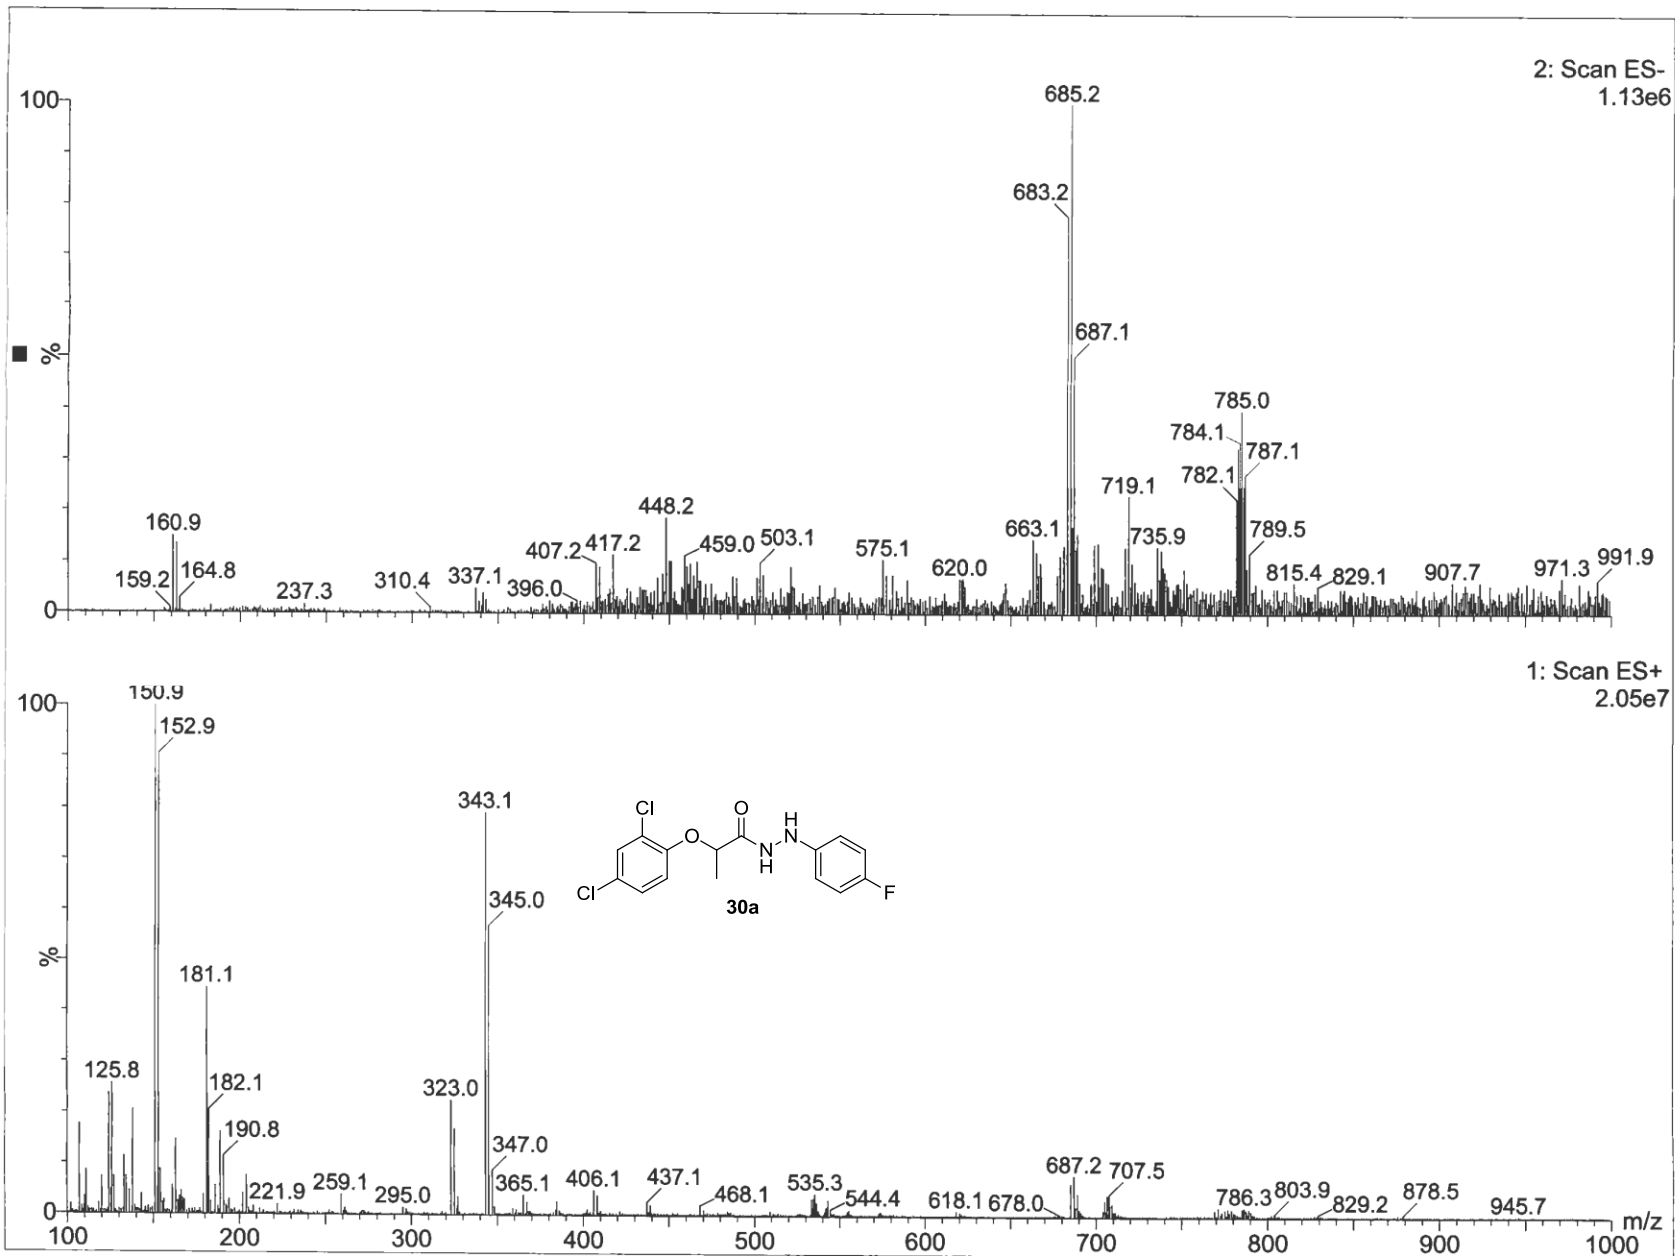

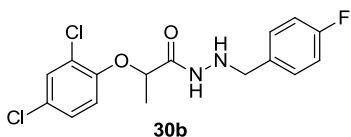

7.946  
 7.360  
 7.352  
 7.275  
 7.264  
 7.258  
 7.247  
 7.229  
 7.188  
 7.180  
 7.159  
 7.150  
 7.019  
 6.991  
 6.962  
 6.812  
 6.783

4.757  
 4.734  
 4.712  
 4.690  
 3.986  
 3.944  
 3.928  
 3.886

1.607  
 1.585

0.000

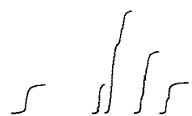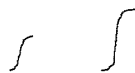

F2 - Acquisition Parameters  
 Date\_ 20120726  
 Time 13.52  
 INSTRUM spect  
 PROBHD 5 mm BBO BB-1H  
 PULPROG zg30  
 TD 65536  
 SOLVENT CDCl3  
 NS 16  
 DS 2  
 SWH 6172.839 Hz  
 FIDRES 0.094190 Hz  
 AQ 5.3084660 sec  
 RG 1024  
 DW 81.000 usec  
 DE 6.50 usec  
 TE 298.2 K  
 D1 1.00000000 sec  
 TD0 1

===== CHANNEL f1 =====  
 NUC1 1H  
 P1 10.00 usec  
 PL1 3.00 dB  
 SFO1 299.5018495 MHz

F2 - Processing parameters  
 SI 32768  
 SF 299.5000058 MHz  
 WDW EM  
 SSB 0  
 LB 0.30 Hz  
 GB 0  
 PC 1.00

0.93  
 0.95  
 3.35  
 2.02  
 0.99

1.12  
 2.00

3.08

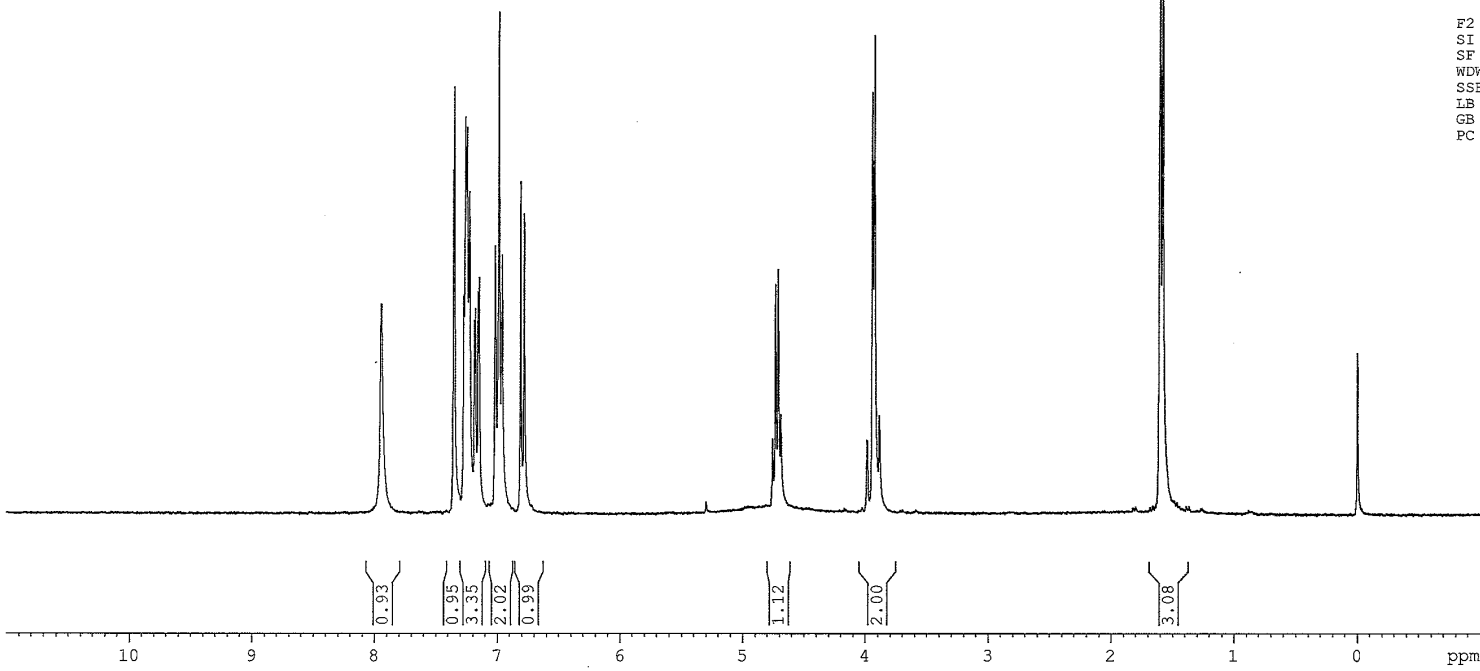

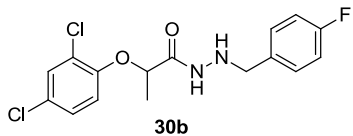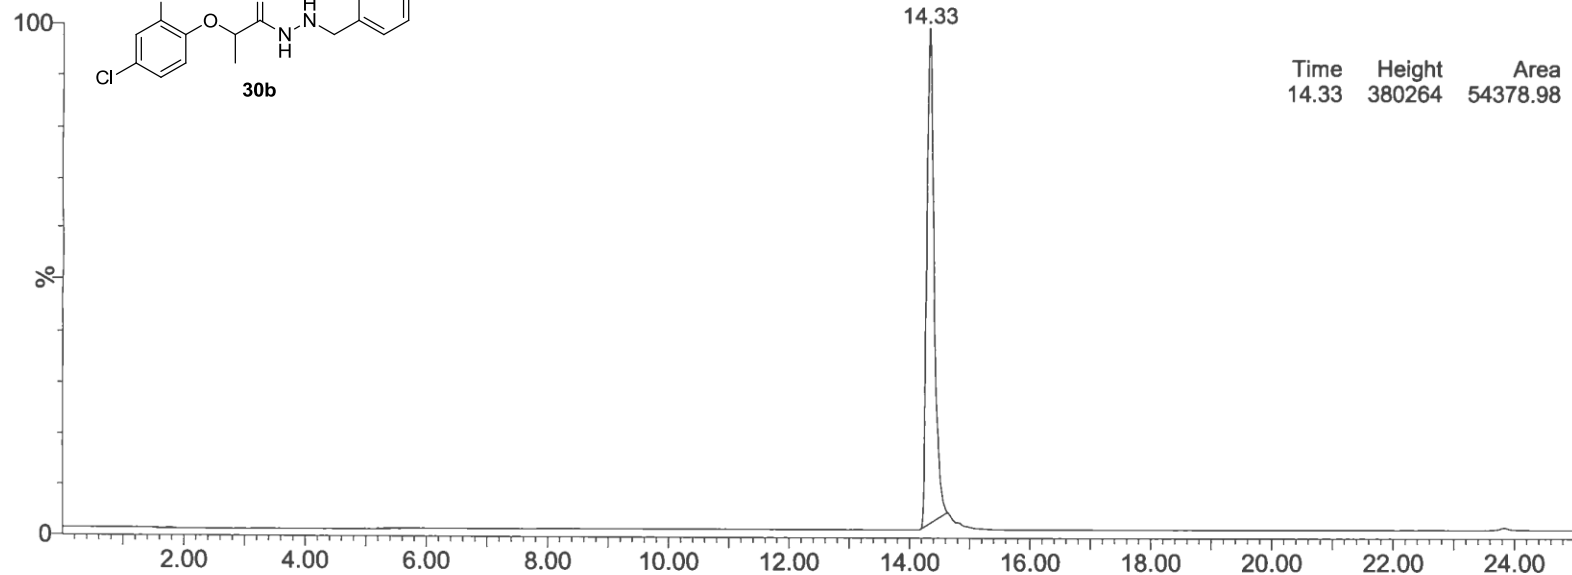

ELSD  
An2  
3.91e5

| Time  | Height | Area     | Area%  |
|-------|--------|----------|--------|
| 14.33 | 380264 | 54378.98 | 100.00 |

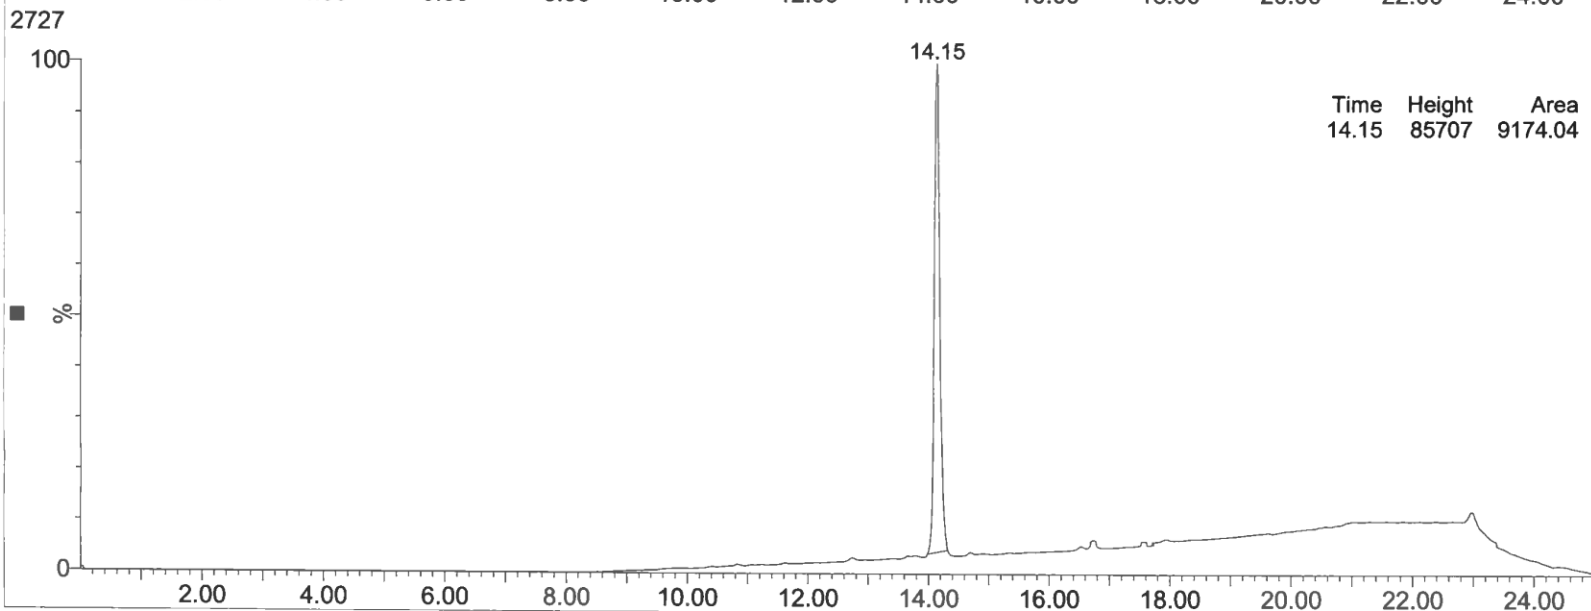

UV  
An1  
8.94e4

| Time  | Height | Area    | Area%  |
|-------|--------|---------|--------|
| 14.15 | 85707  | 9174.04 | 100.00 |



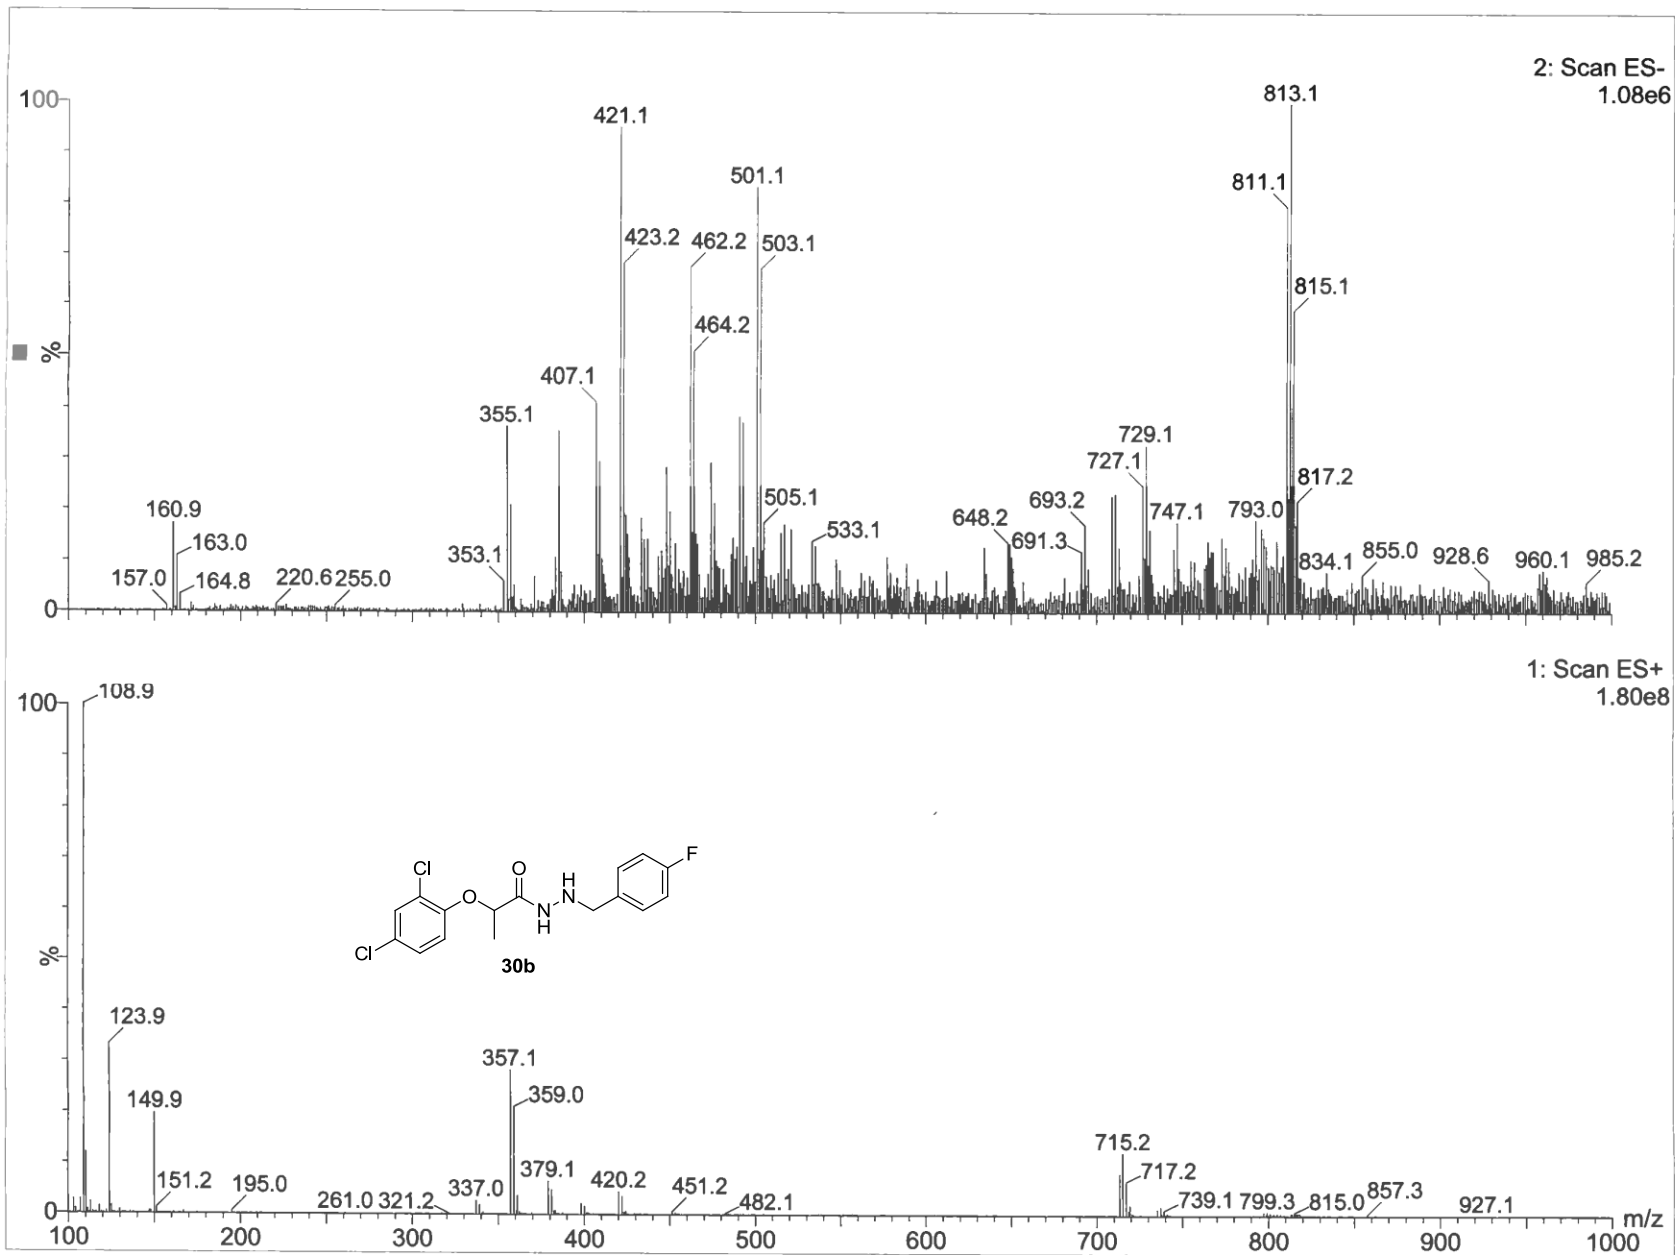

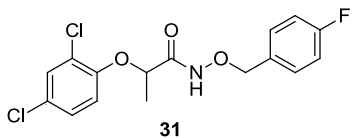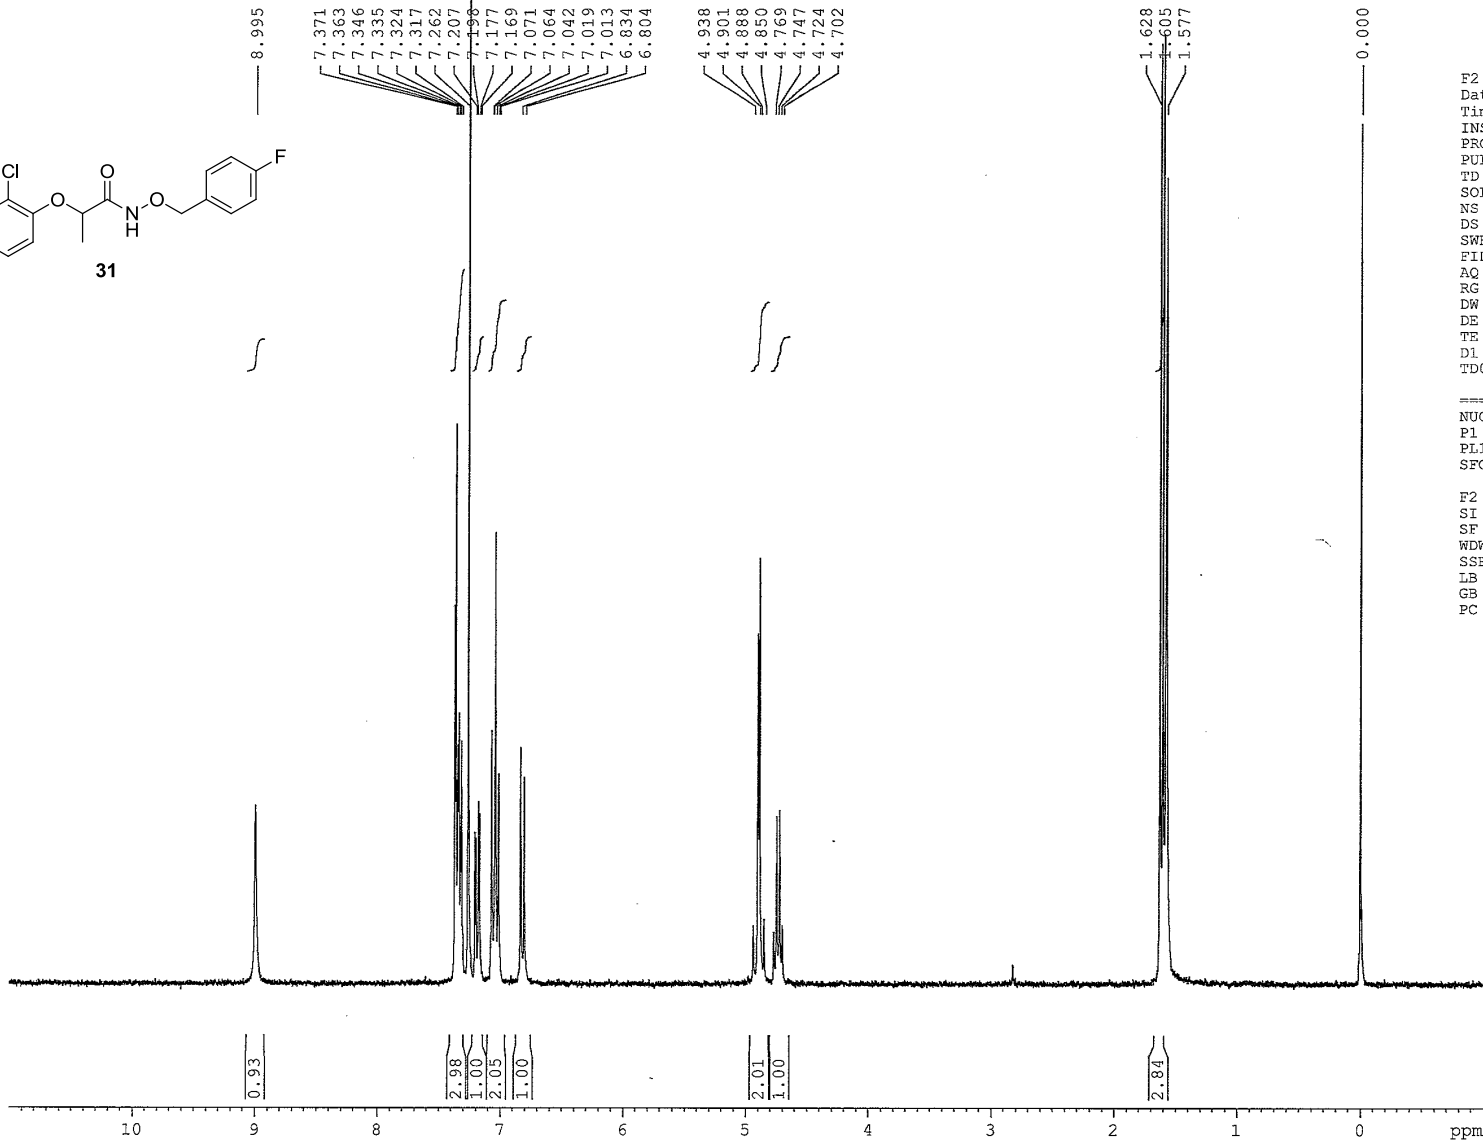

F2 - Acquisition Parameters  
 Date\_ 20120720  
 Time\_ 13.26  
 INSTRUM spect  
 PROBHD 5 mm BBO BB-1H  
 PULPROG zg30  
 TD 65536  
 SOLVENT CDCl3  
 NS 16  
 DS 2  
 SWH 6172.839 Hz  
 FIDRES 0.094190 Hz  
 AQ 5.3084660 sec  
 RG 2896.3  
 DW 81.000 usec  
 DE 6.50 usec  
 TE 298.2 K  
 D1 1.00000000 sec  
 TD0 1

===== CHANNEL f1 =====  
 NUC1 1H  
 P1 10.00 usec  
 PL1 3.00 dB  
 SFO1 299.5018495 MHz

F2 - Processing parameters  
 SI 32768  
 SF 299.5000058 MHz  
 WDW EM  
 SSB 0  
 LB 0.30 Hz  
 GB 0  
 PC 1.00

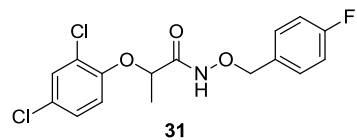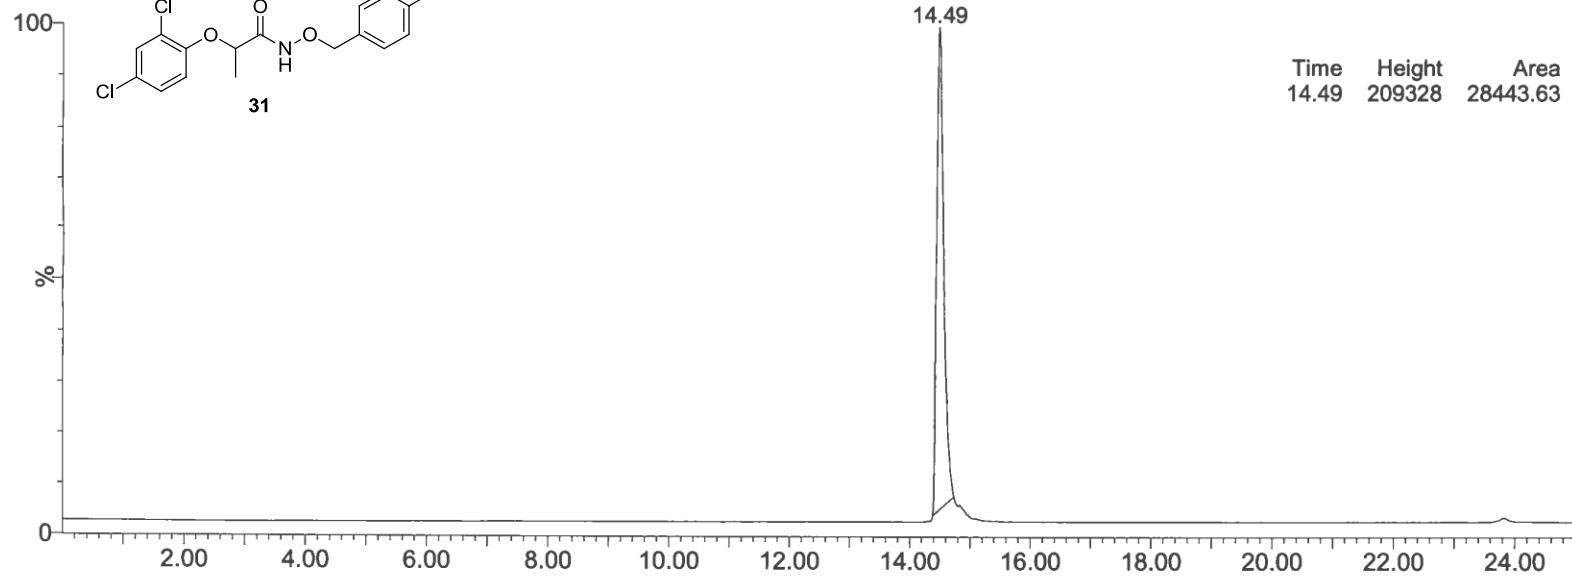

ELSD  
An2  
2.21e5

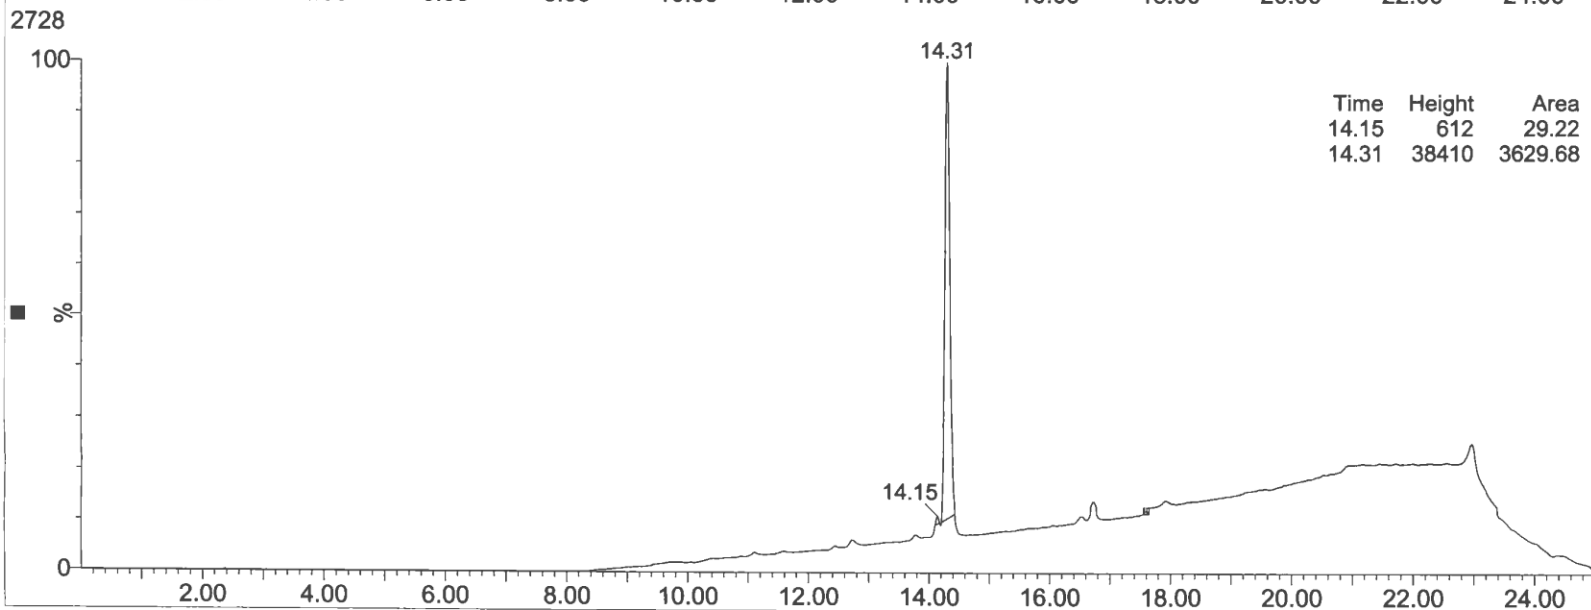

UV  
An1  
4.30e4

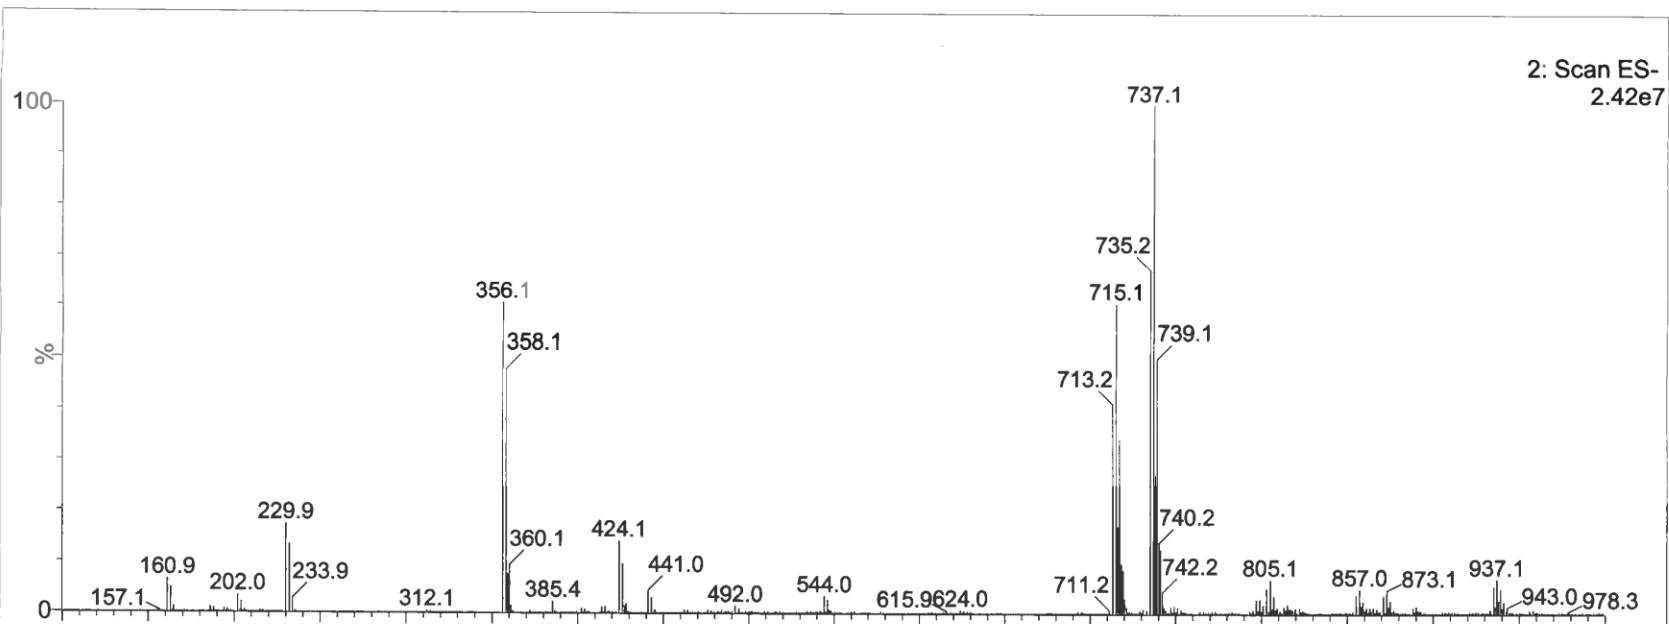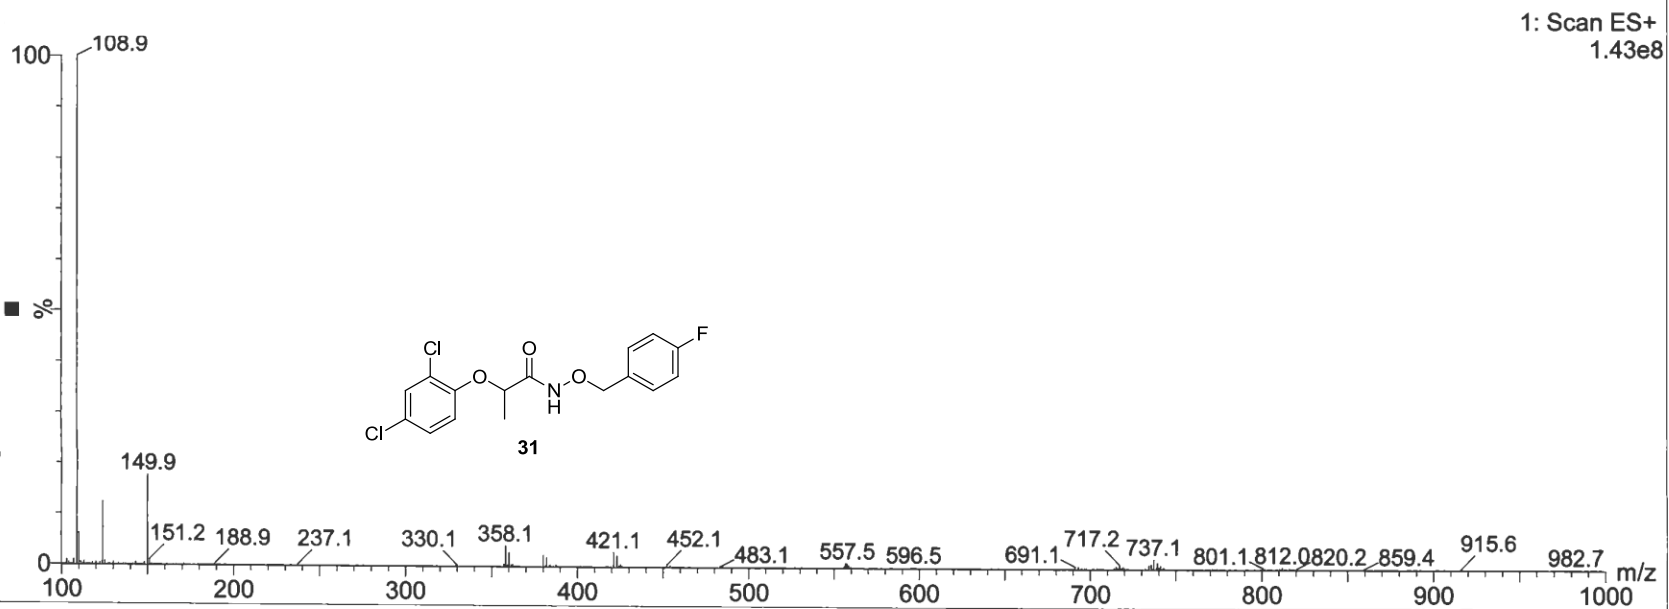

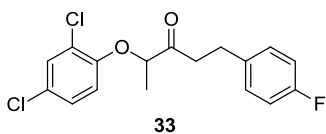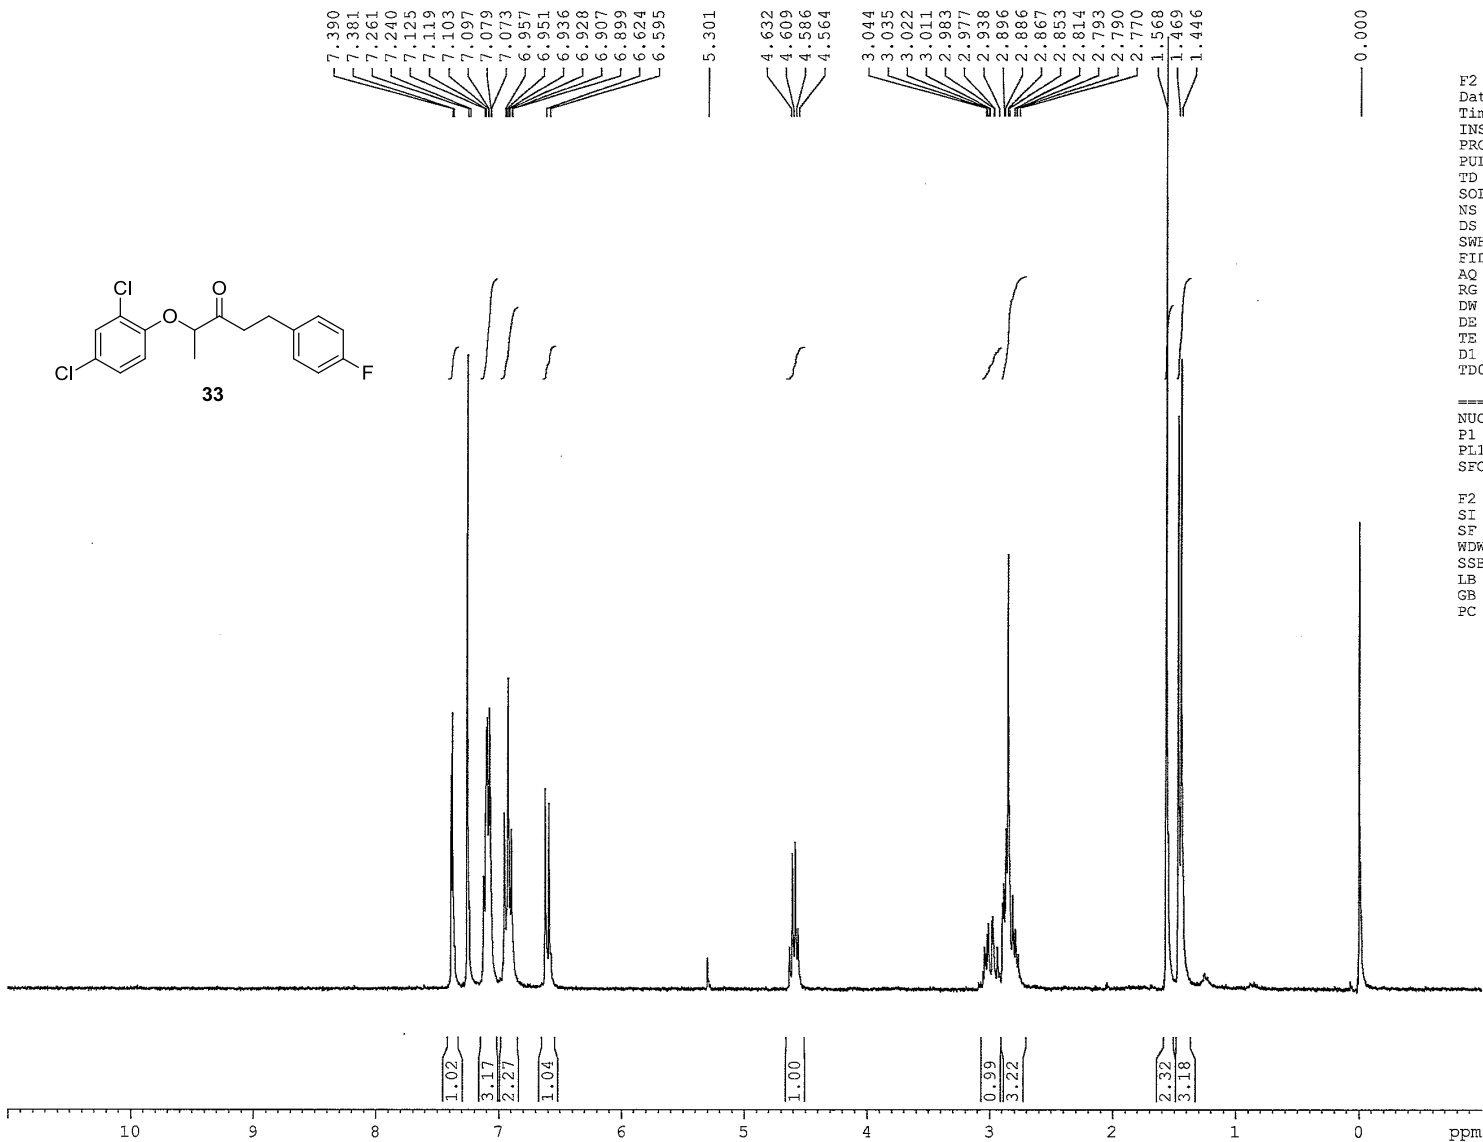

7.390  
7.381  
7.261  
7.240  
7.125  
7.119  
7.103  
7.097  
7.079  
7.073  
6.957  
6.951  
6.936  
6.928  
6.907  
6.899  
6.624  
6.595

5.301

4.632  
4.609  
4.586  
4.564

3.044  
3.035  
3.022  
3.011  
2.983  
2.977  
2.938  
2.896  
2.886  
2.867  
2.853  
2.814  
2.793  
2.790  
2.770  
1.568  
1.469  
1.446

0.000

F2 - Acquisition Parameters  
 Date\_ 20120620  
 Time 9.29  
 INSTRUM spect  
 PROBHD 5 mm BBO BB-1H  
 PULPROG zg30  
 TD 65536  
 SOLVENT CDCl3  
 NS 16  
 DS 2  
 SWH 6172.839 Hz  
 FIDRES 0.094190 Hz  
 AQ 5.3084660 sec  
 RG 1625.5  
 DW 81.000 usec  
 DE 6.50 usec  
 TE 295.8 K  
 D1 1.00000000 sec  
 TD0 1

----- CHANNEL f1 -----  
 NUC1 1H  
 P1 10.00 usec  
 PL1 3.00 dB  
 SFO1 299.5018495 MHz

F2 - Processing parameters  
 SI 32768  
 SF 299.5000059 MHz  
 WDW EM  
 SSB 0  
 LB 0.30 Hz  
 GB 0  
 PC 1.00

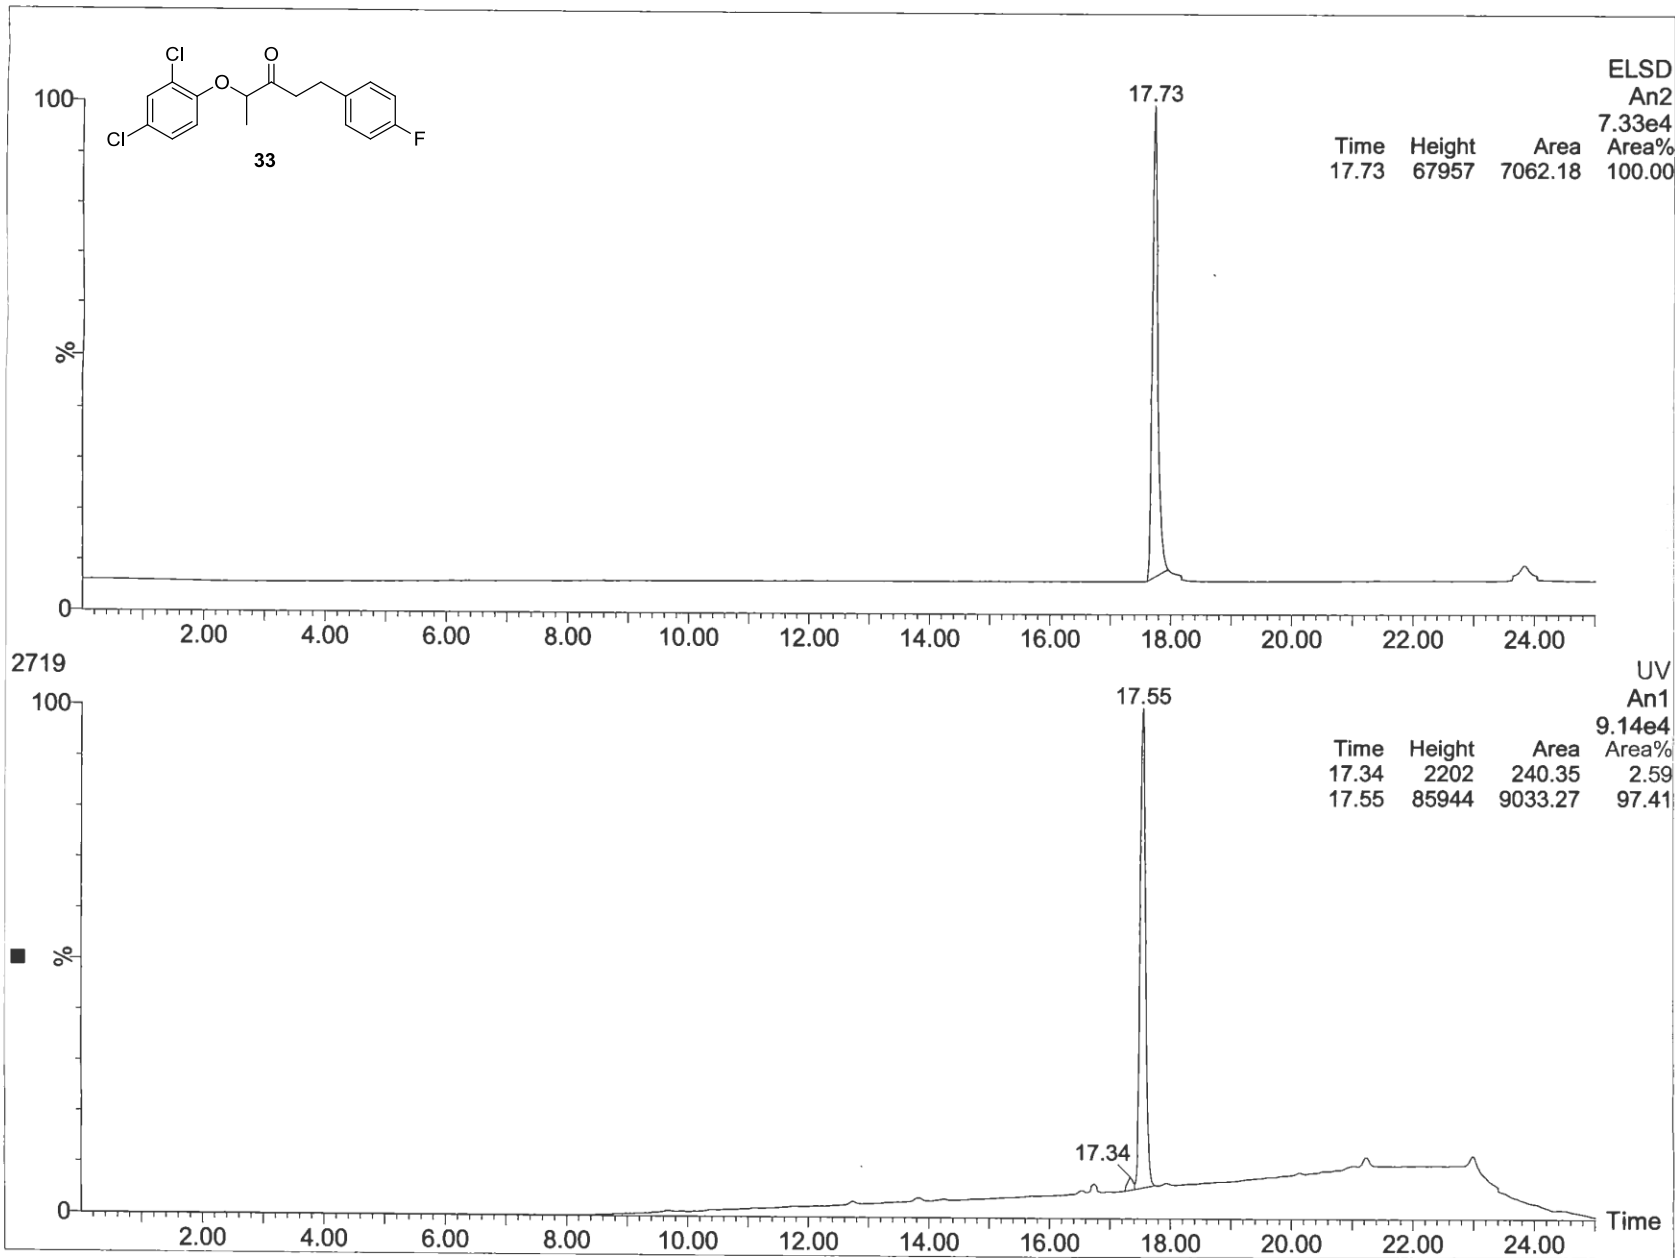

Abundance

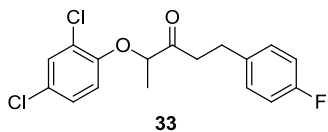

3.5e+07

10.362

3e+07

2.5e+07

2e+07

1.5e+07

1e+07

5000000

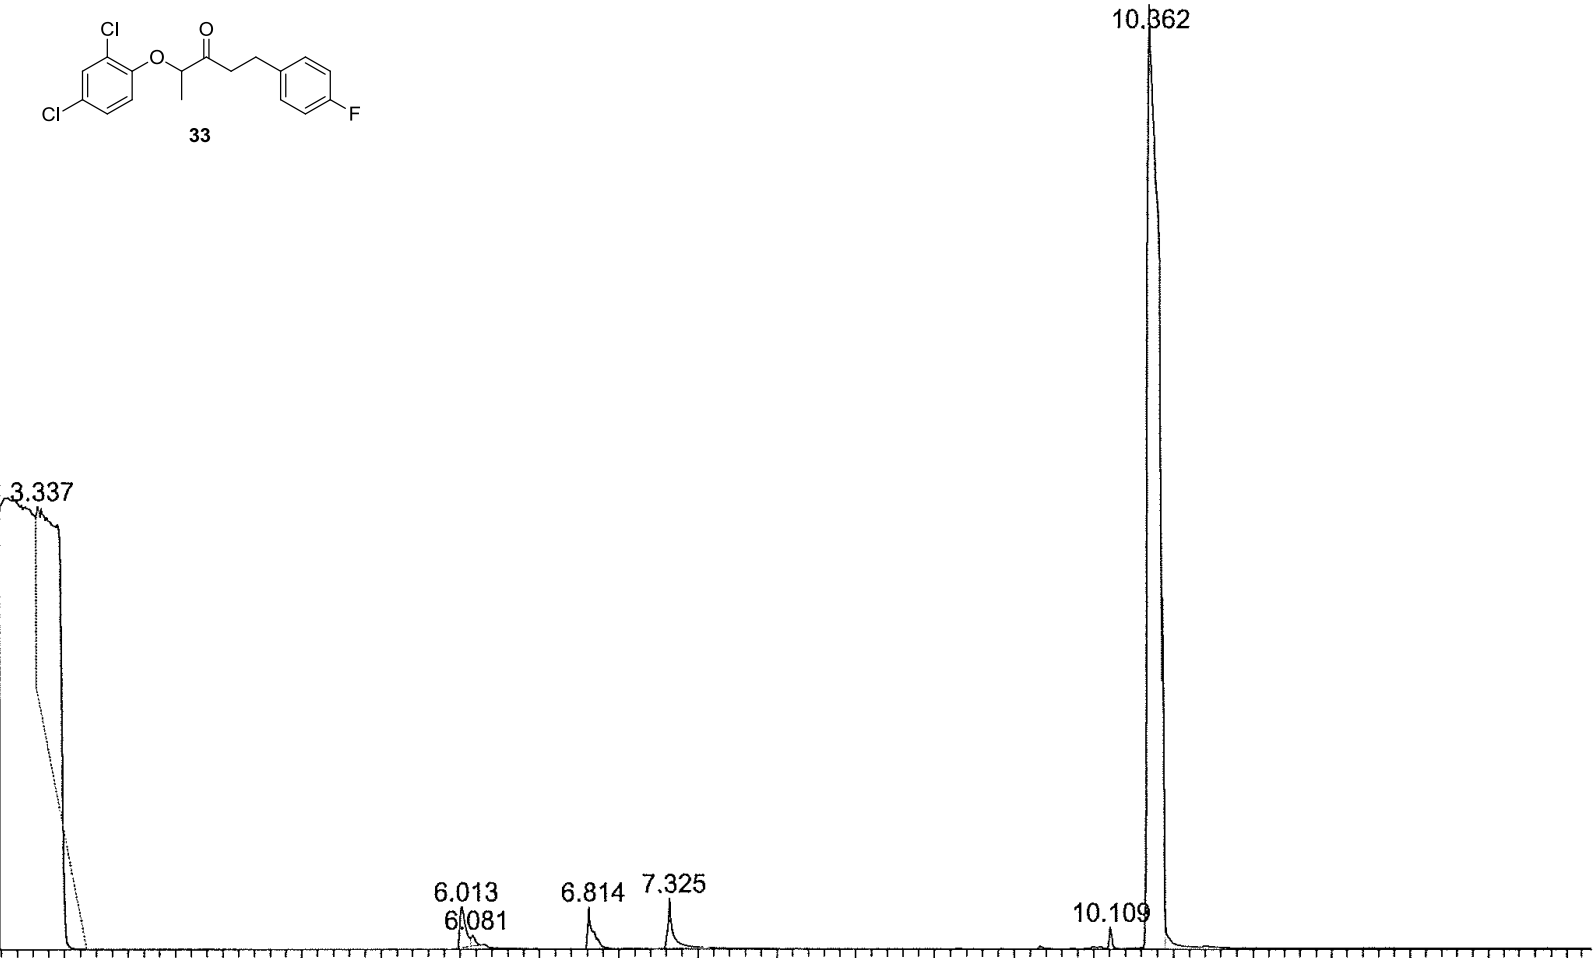

Time-->

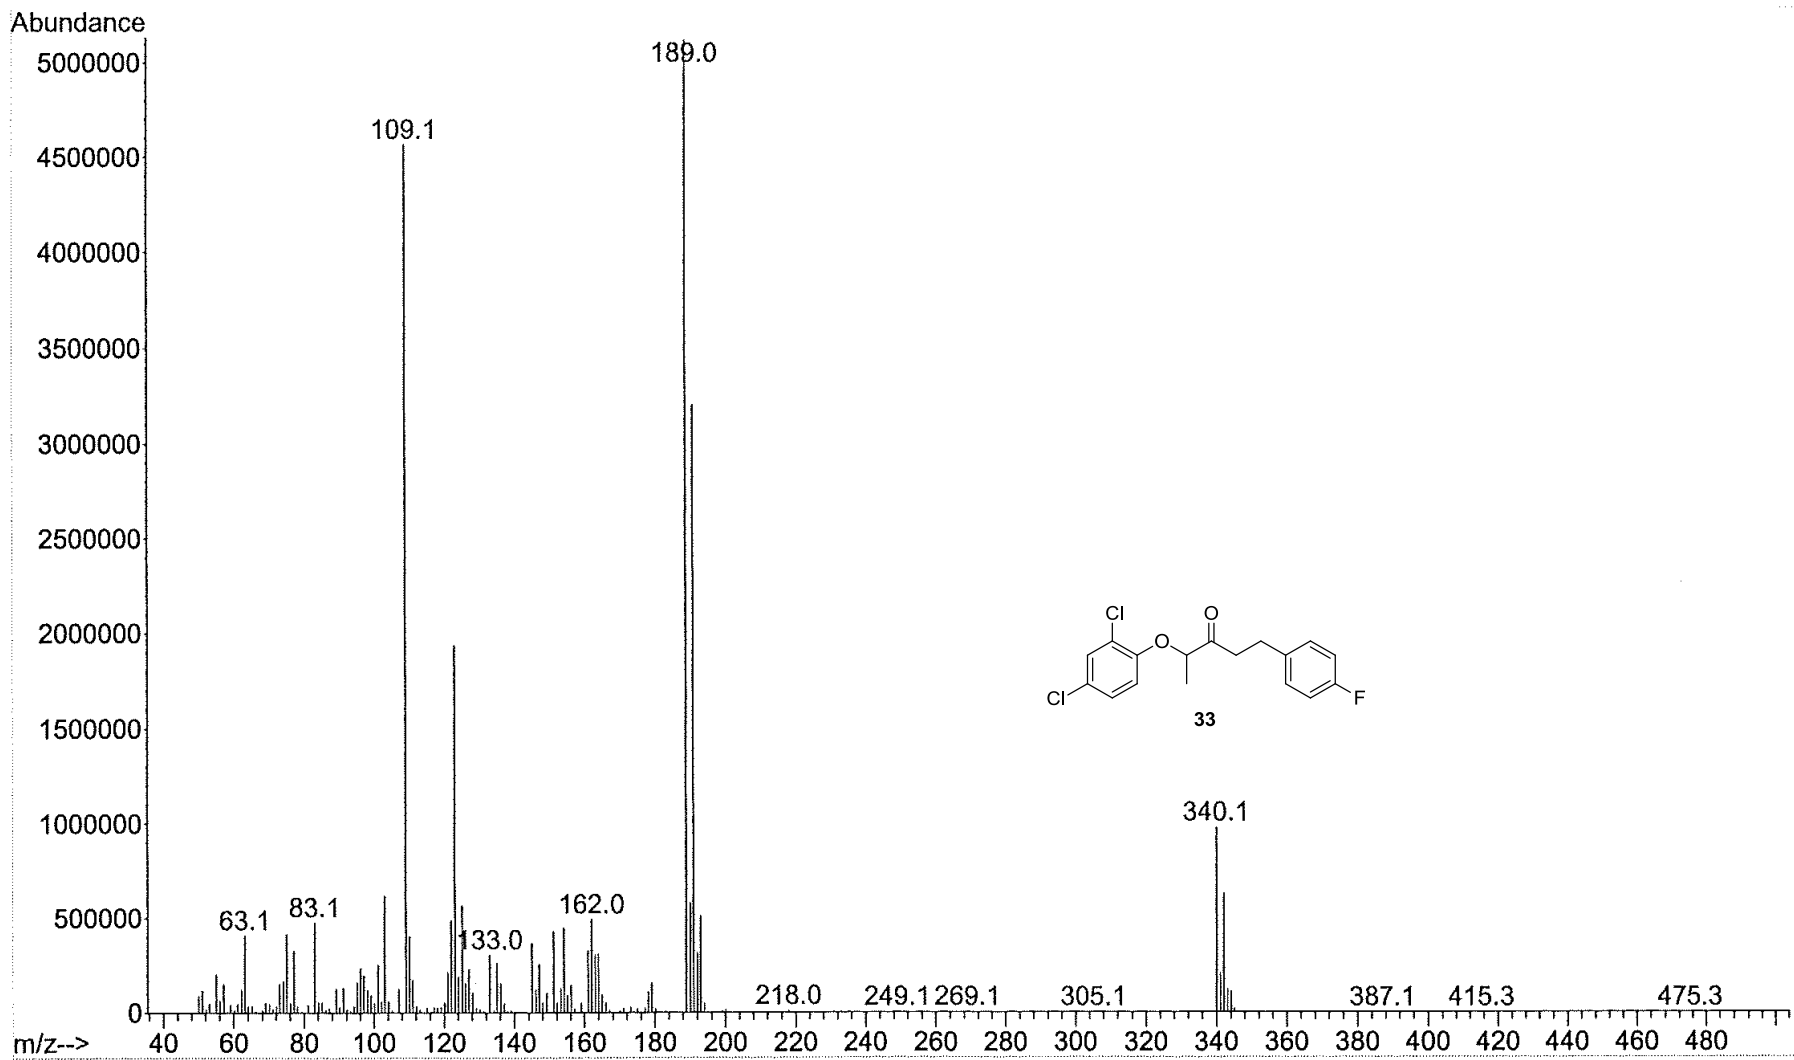



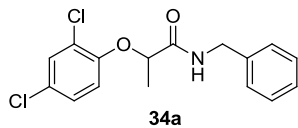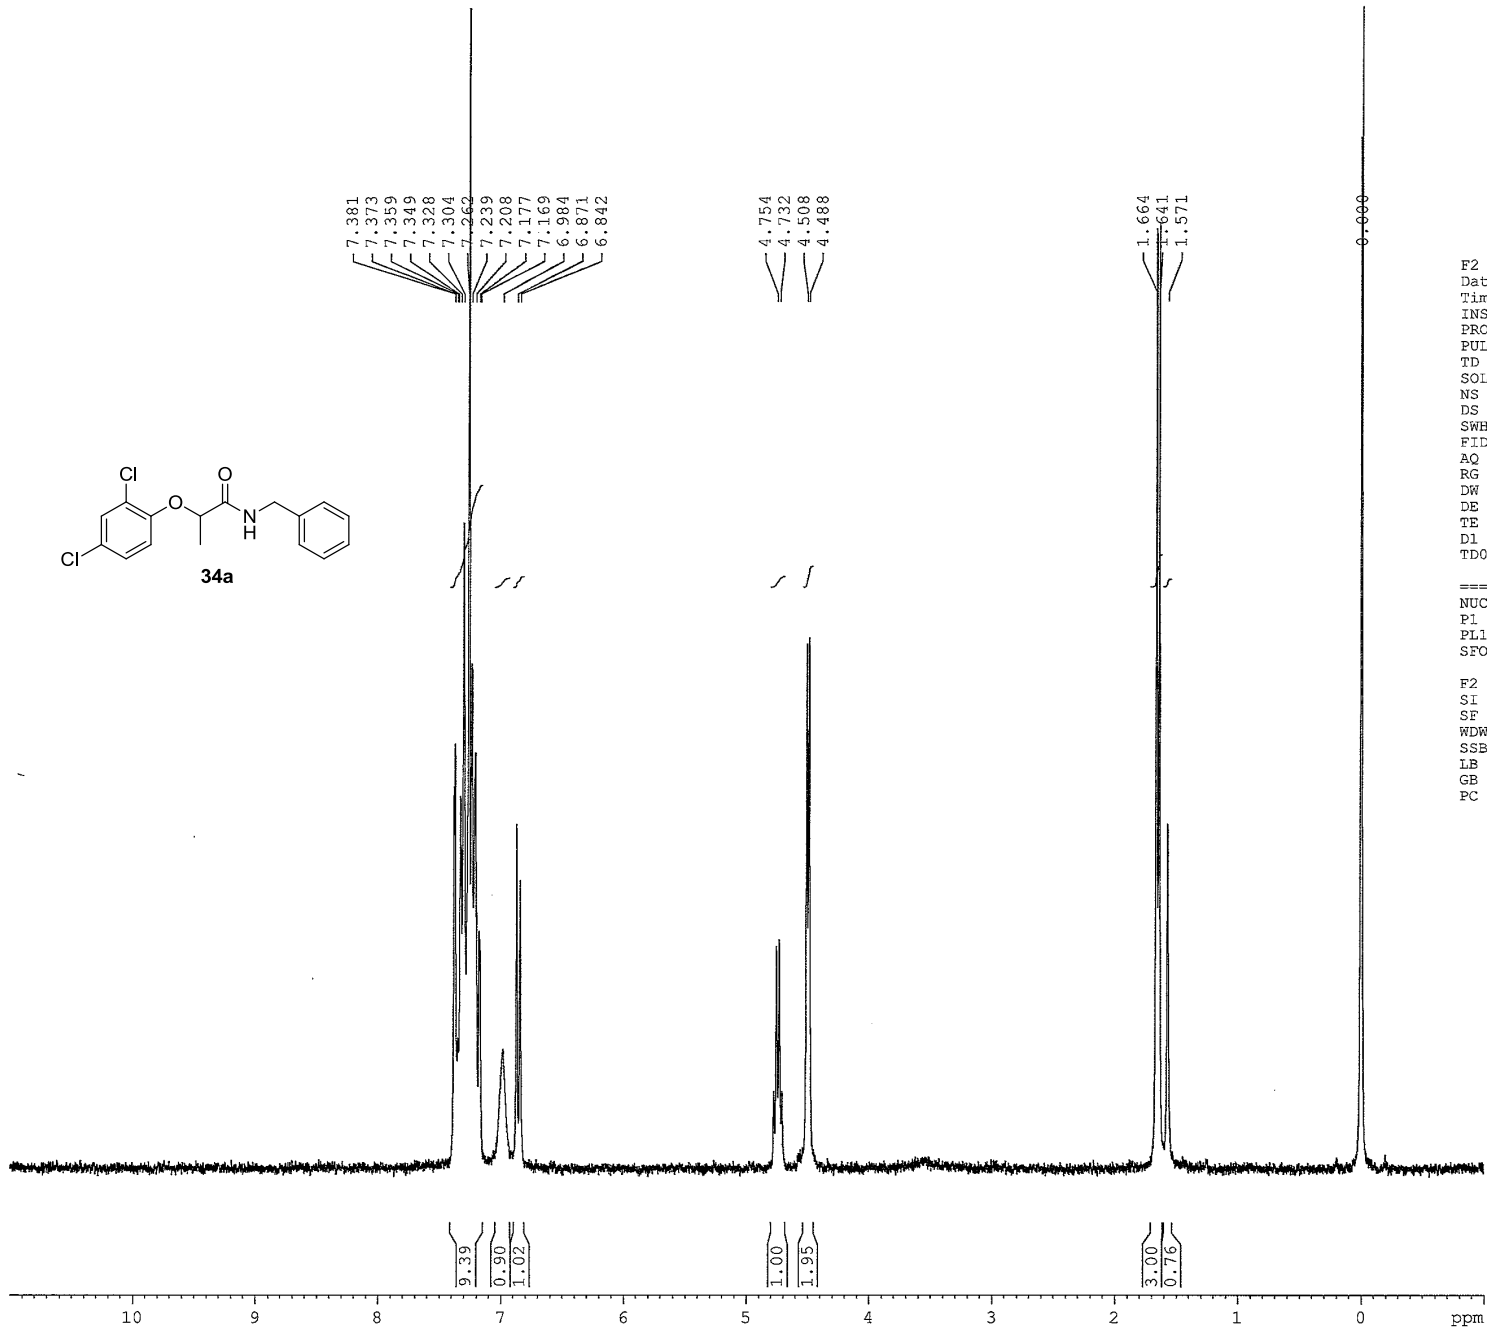

F2 - Acquisition Parameters

Date 20100413  
 Time 10.14  
 INSTRUM spect  
 PROBHD 5 mm BBO BB-1H  
 PULPROG zg30  
 TD 65536  
 SOLVENT CDCl3  
 NS 16  
 DS 2  
 SWH 6172.839 Hz  
 FIDRES 0.094190 Hz  
 AQ 5.3084660 sec  
 RG 2048  
 DW 81.000 usec  
 DE 6.50 usec  
 TE 292.5 K  
 D1 1.00000000 sec  
 TD0 1

===== CHANNEL f1 =====  
 NUC1 1H  
 P1 10.00 usec  
 PL1 9.20 dB  
 SFO1 299.5718500 MHz

F2 - Processing parameters  
 SI 32768  
 SF 299.5700030 MHz  
 WDW EM  
 SSB 0  
 LB 0.30 Hz  
 GB 0  
 PC 1.00

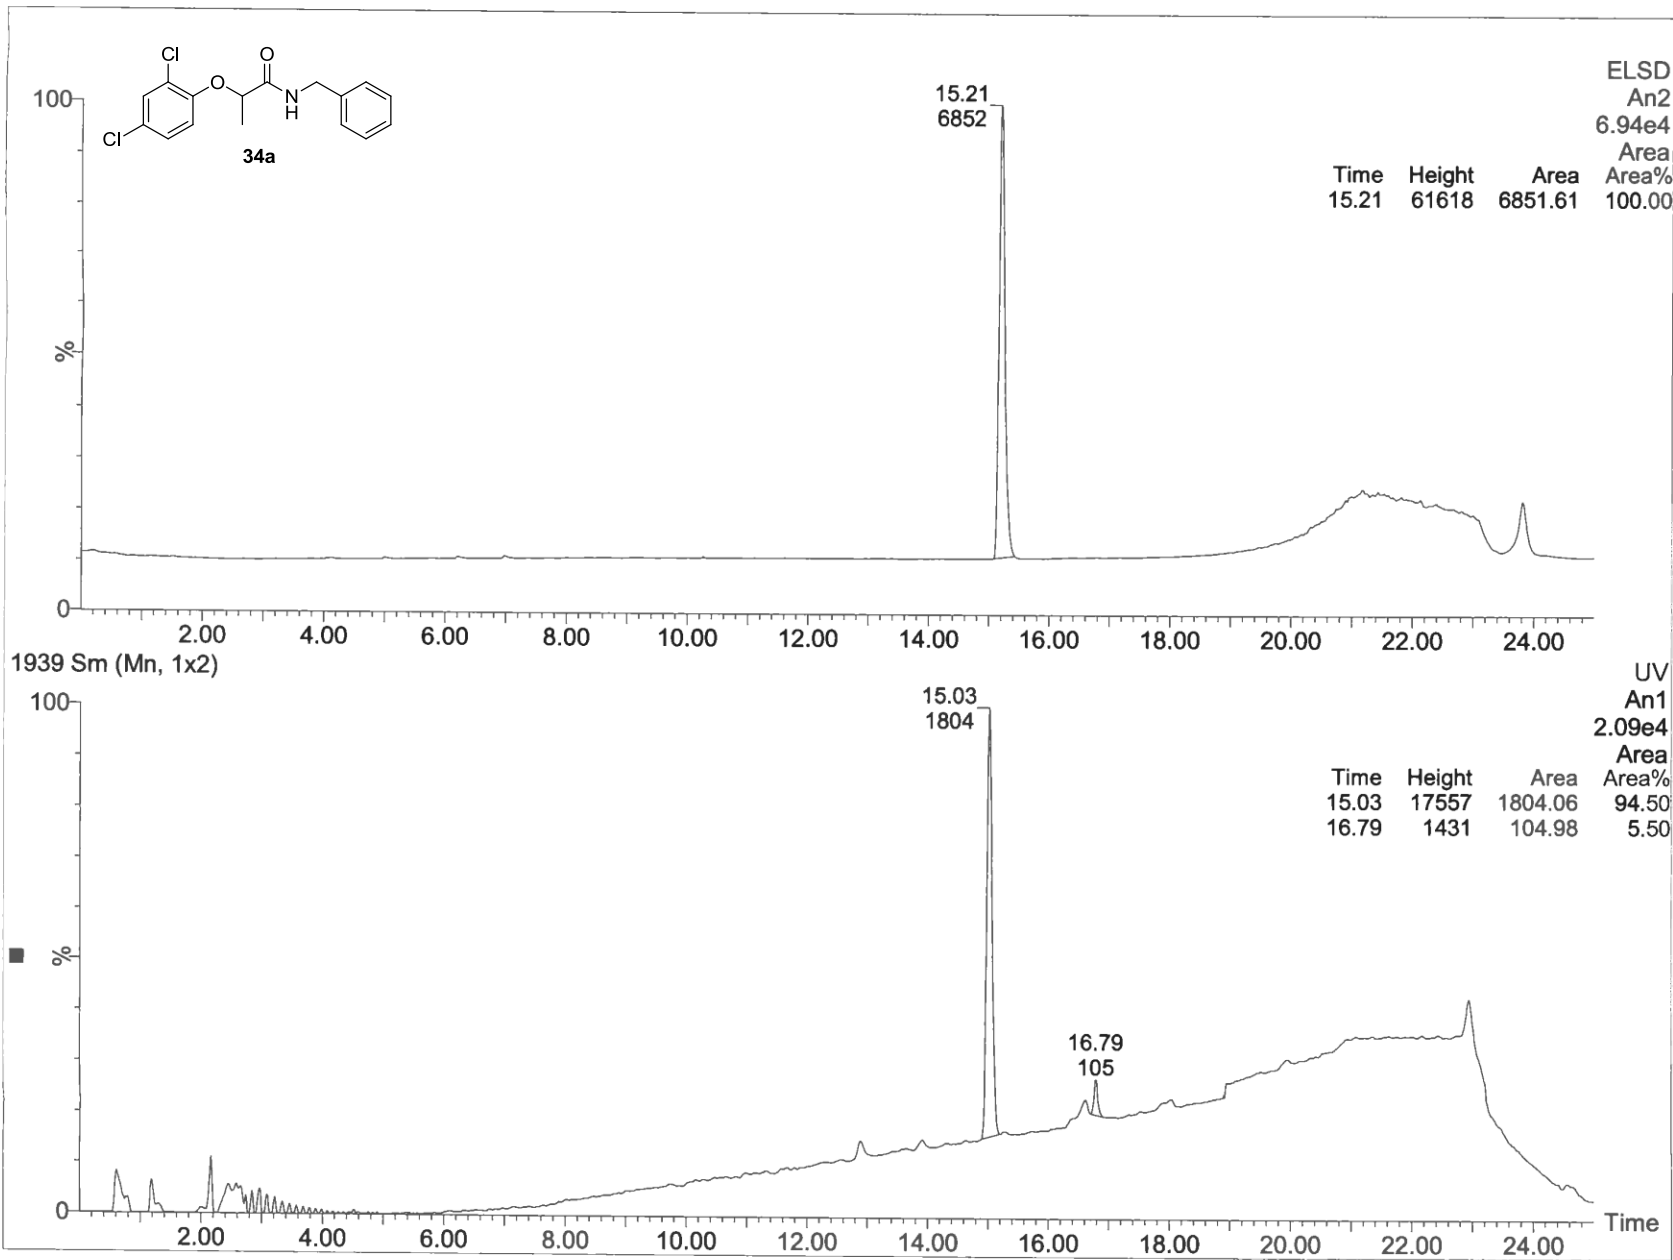

1: Scan ES+  
8.14e7

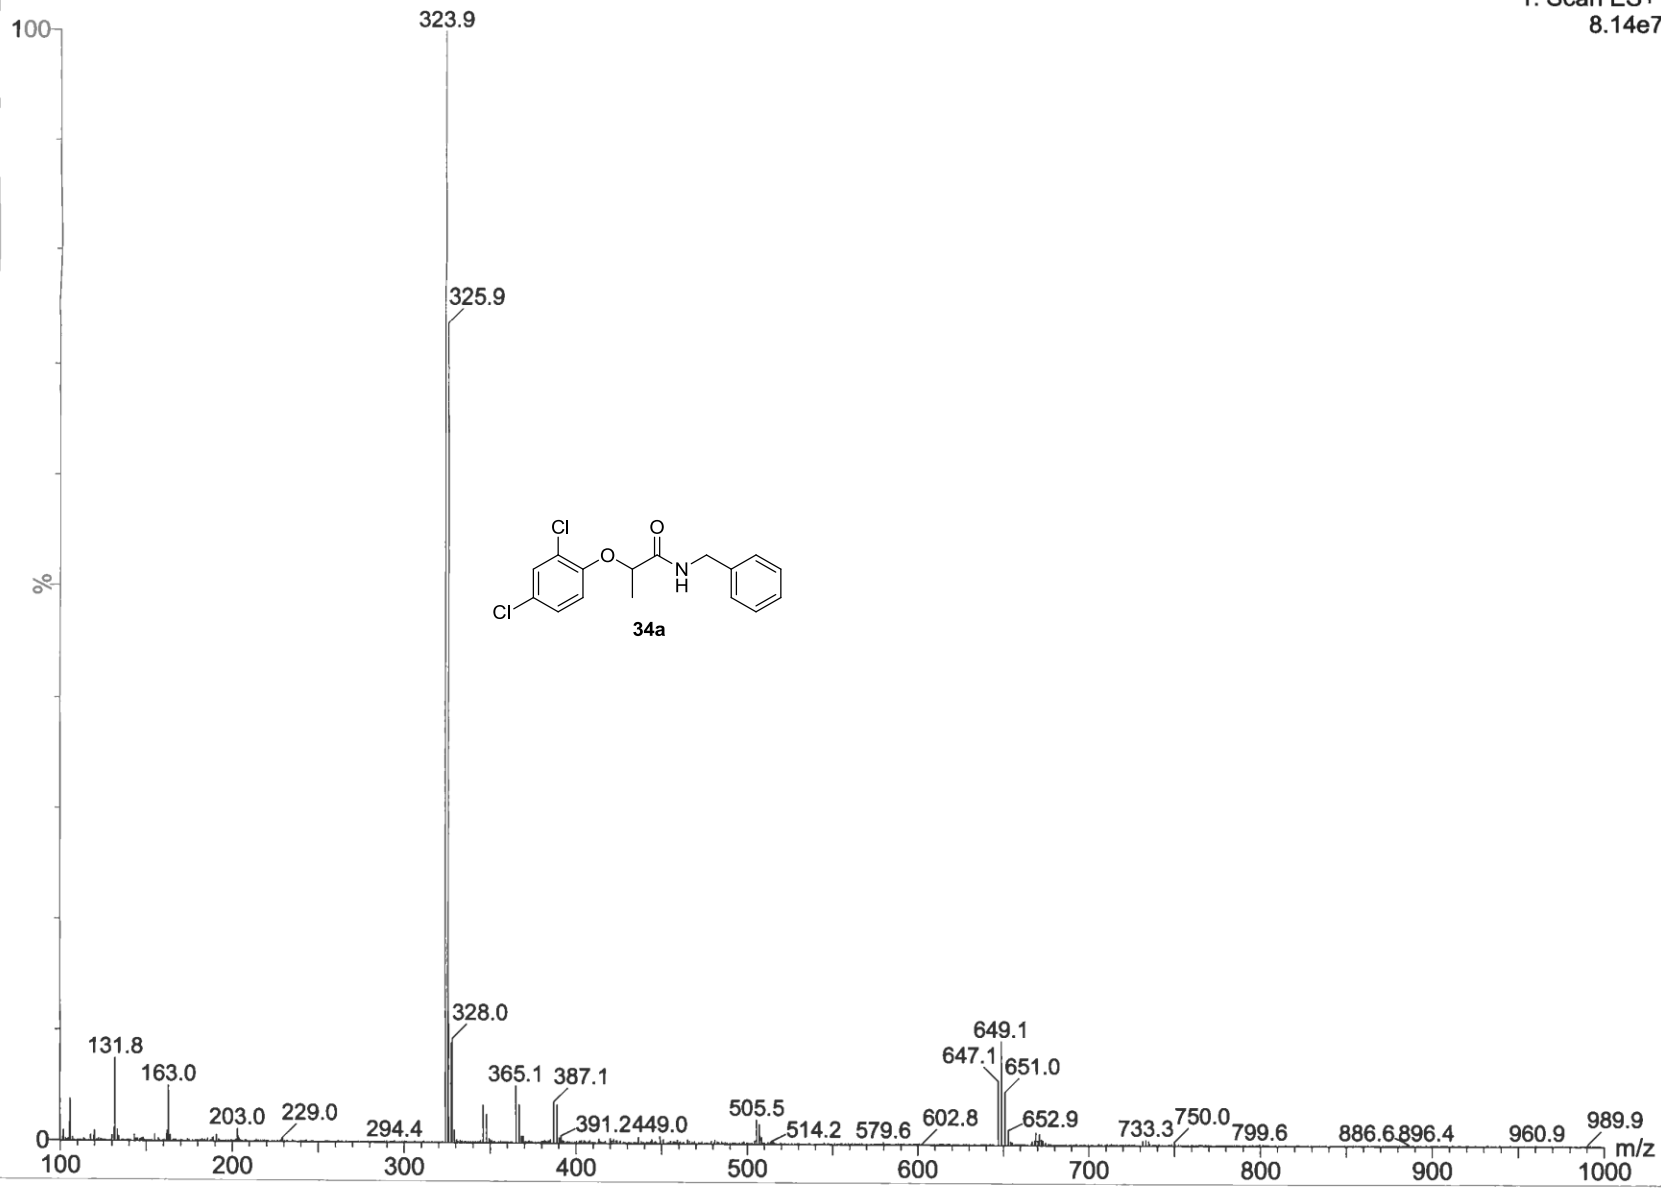

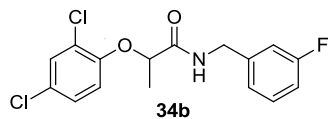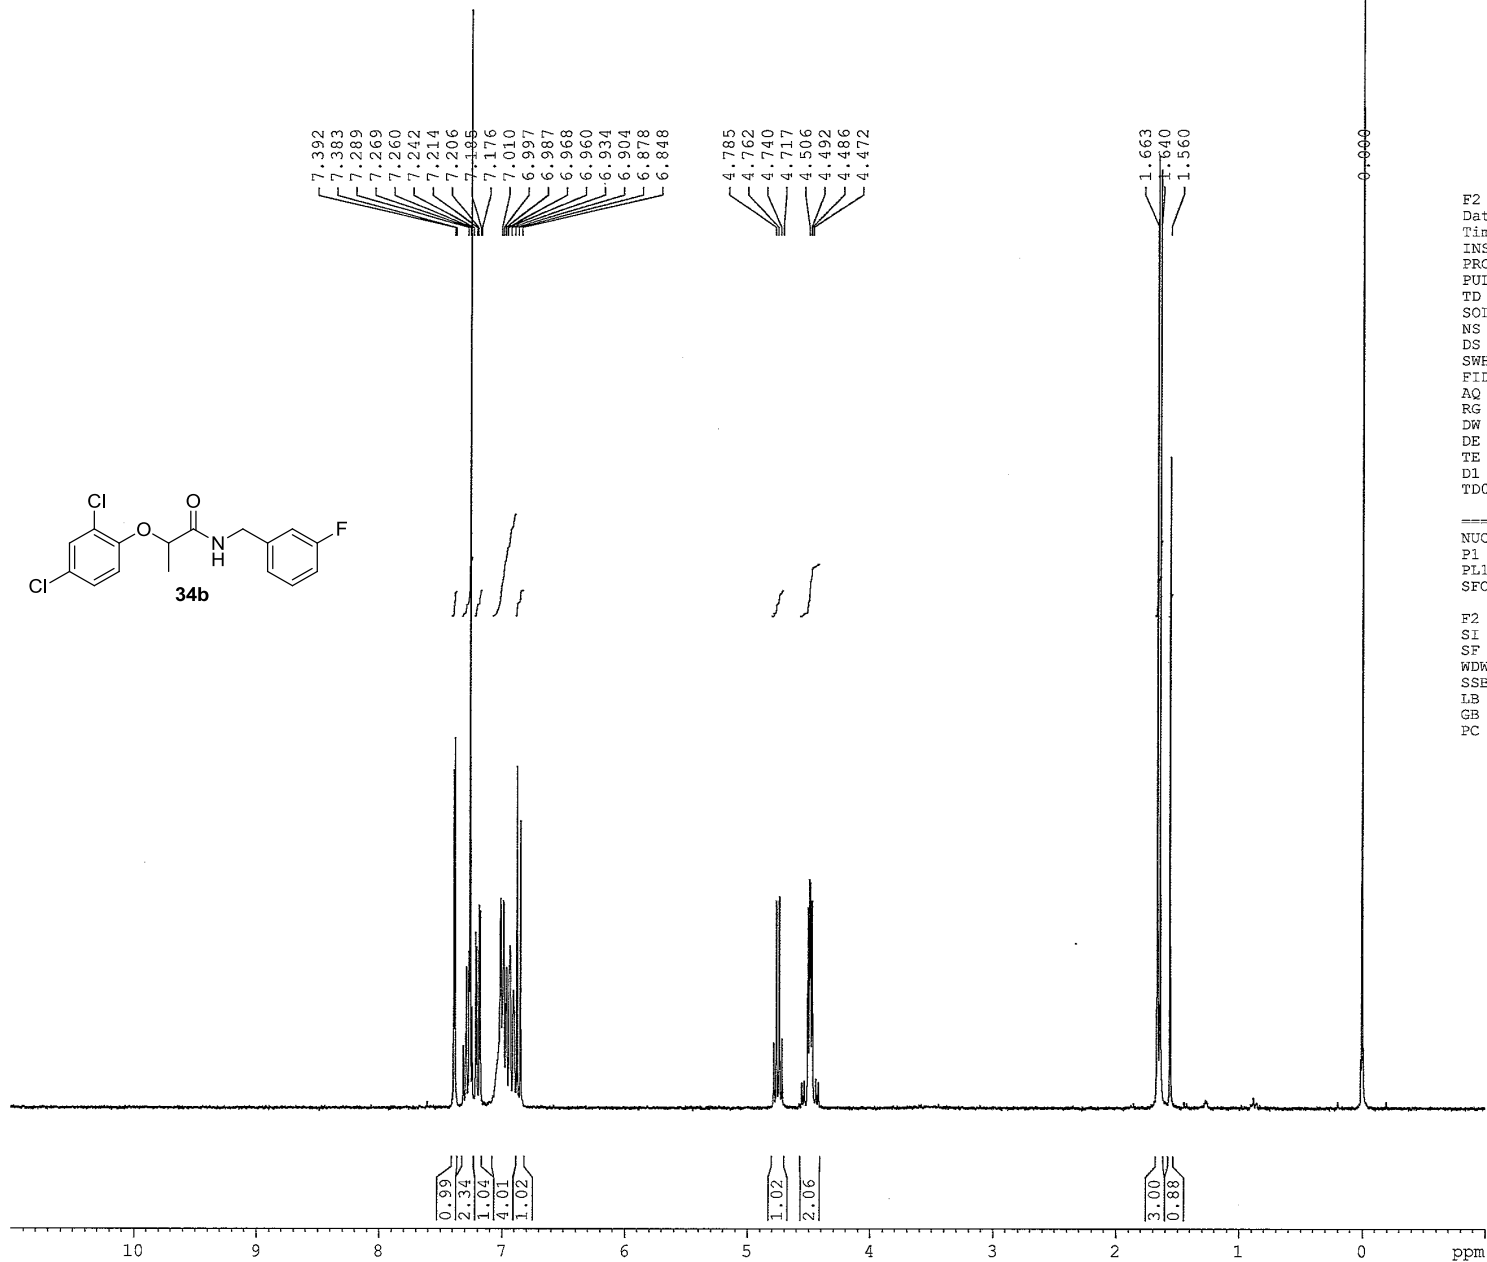

F2 - Acquisition Parameters  
 Date\_ 20100505  
 Time\_ 14.25  
 INSTRUM spect  
 PROBHD 5 mm BBO BB-1H  
 PULPROG zg30  
 TD 65536  
 SOLVENT CDCl3  
 NS 16  
 DS 2  
 SWH 6172.839 Hz  
 FIDRES 0.094190 Hz  
 AQ 5.3084660 sec  
 RG 2298.8  
 DW 81.000 usec  
 DE 6.50 usec  
 TE 298.2 K  
 D1 1.00000000 sec  
 TDO 1

===== CHANNEL f1 =====  
 NUC1 1H  
 P1 10.00 usec  
 PL1 9.20 dB  
 SFO1 299.5718500 MHz

F2 - Processing parameters  
 SI 32768  
 SF 299.5700032 MHz  
 WDW EM  
 SSB 0  
 LB 0.30 Hz  
 GB 0  
 PC 1.00

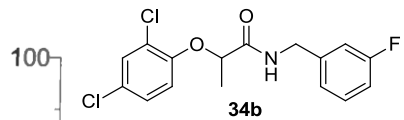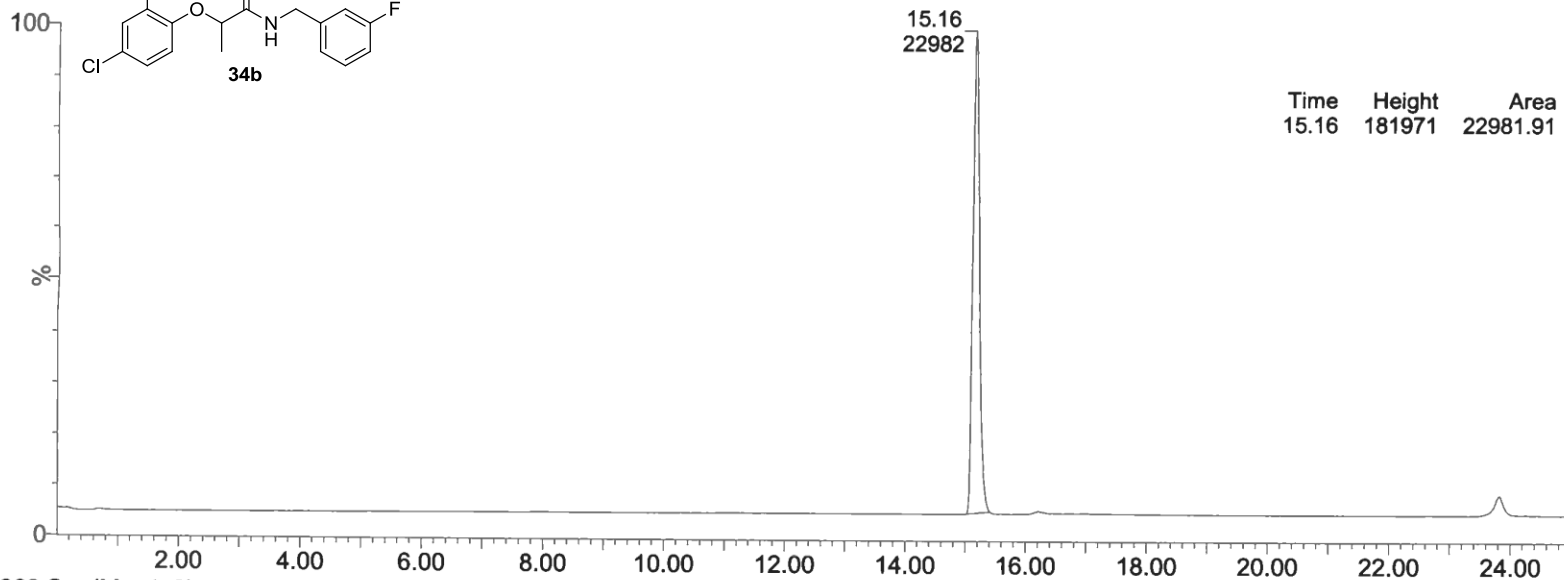

ELSD  
An2  
1.92e5  
Area:  
Area%

| Time  | Height | Area     | Area%  |
|-------|--------|----------|--------|
| 15.16 | 181971 | 22981.91 | 100.00 |

1963 Sm (Mn, 1x2)

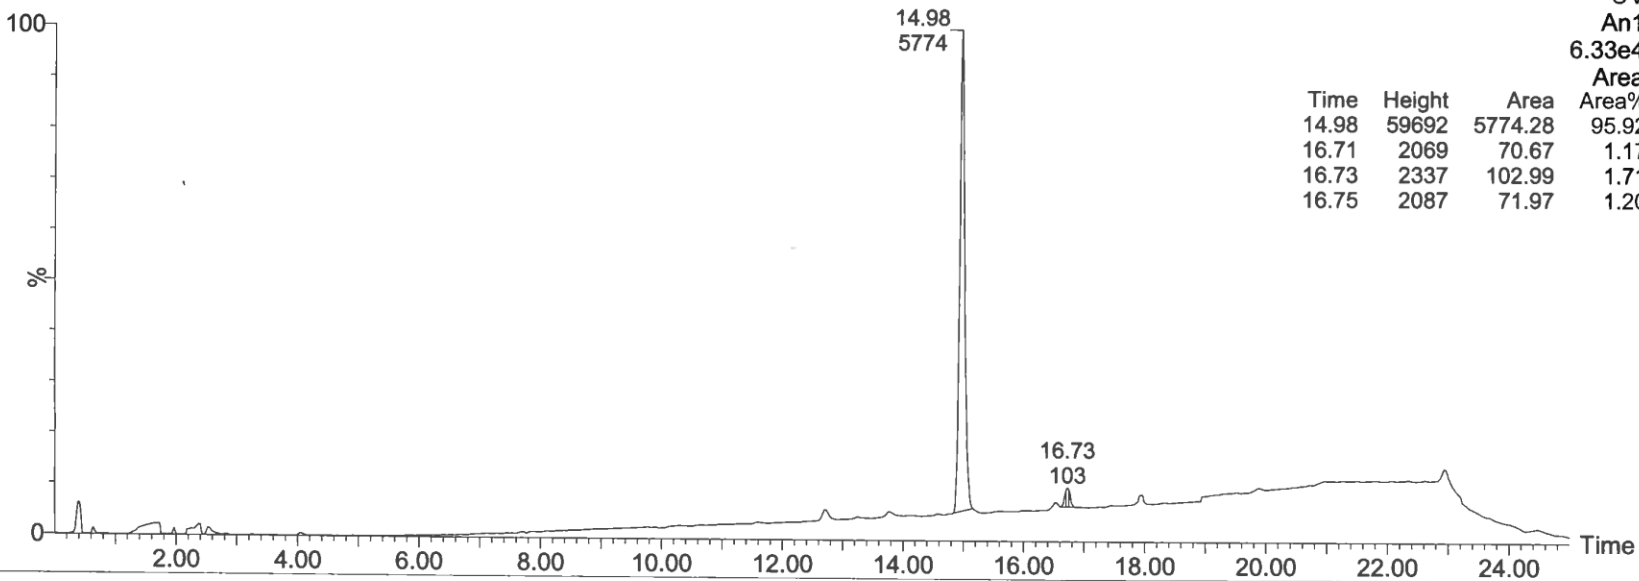

UV  
An1  
6.33e4  
Area  
Area%

| Time  | Height | Area    | Area% |
|-------|--------|---------|-------|
| 14.98 | 59692  | 5774.28 | 95.92 |
| 16.71 | 2069   | 70.67   | 1.17  |
| 16.73 | 2337   | 102.99  | 1.71  |
| 16.75 | 2087   | 71.97   | 1.20  |

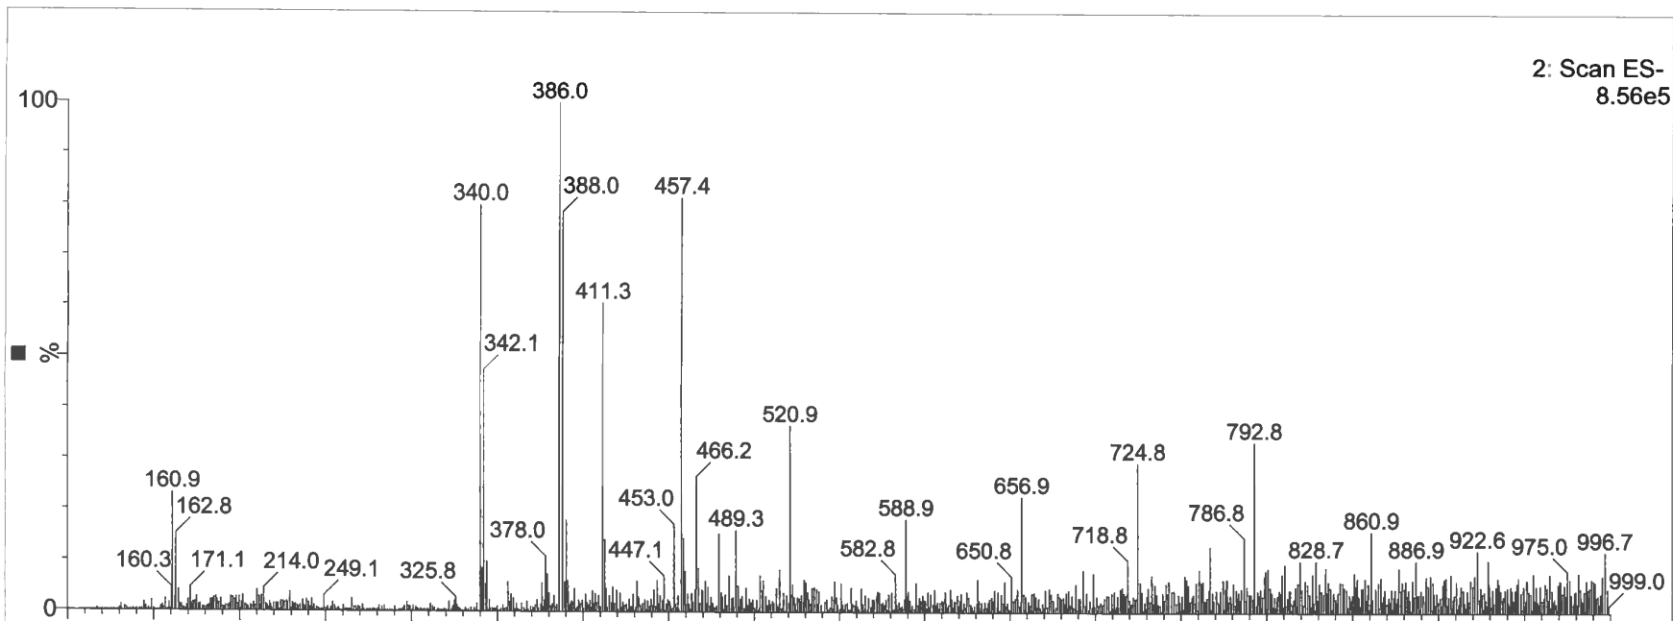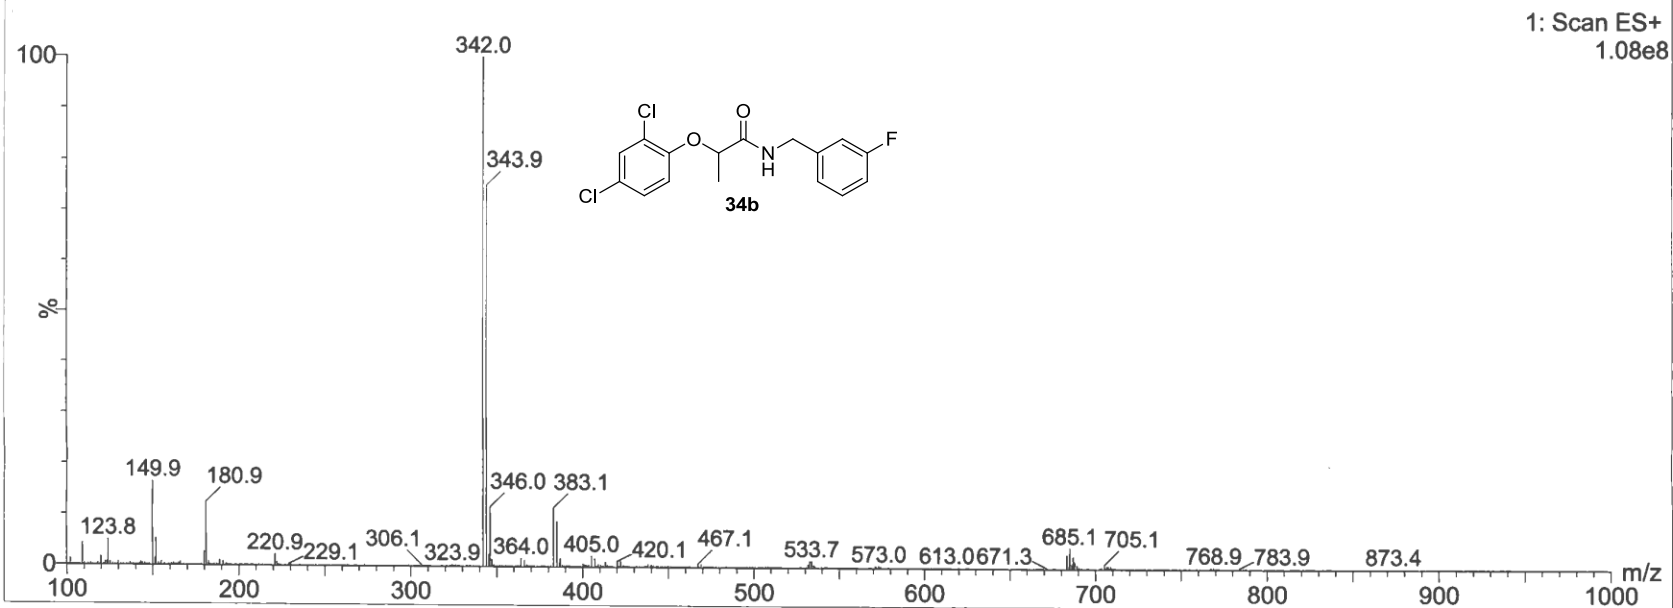

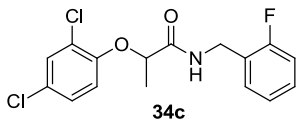

7.381  
7.372  
7.294  
7.287  
7.274  
7.269  
7.260  
7.251  
7.244  
7.238  
7.233  
7.169  
7.160  
7.139  
7.131  
7.114  
7.110  
7.085  
7.061  
7.047  
7.034  
7.028  
7.000  
6.995  
6.832  
6.802  
4.742  
4.720  
4.697  
4.675  
4.556  
4.546  
4.536  
4.526

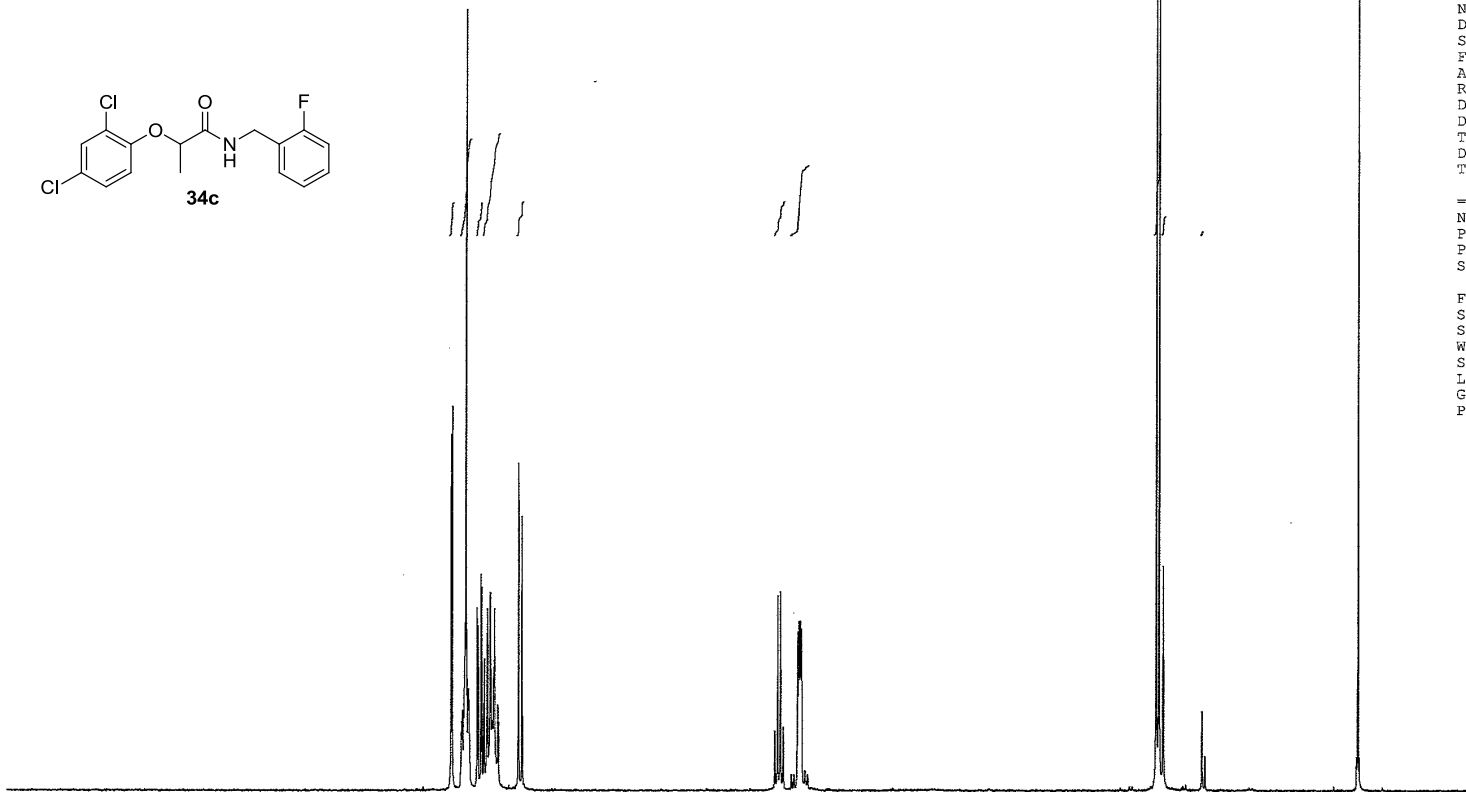

0.99  
2.85  
1.02  
3.00  
1.01

1.01  
2.05

3.00  
0.57  
0.13

F2 - Acquisition Parameters  
Date\_ 20100505  
Time\_ 14.16  
INSTRUM spect  
PROBHD 5 mm BBO BB-1H  
PULPROG zg30  
TD 65536  
SOLVENT CDCl3  
NS 16  
DS 2  
SWH 6172.839 Hz  
FIDRES 0.094190 Hz  
AQ 5.3084660 sec  
RG 1625.5  
DW 81.000 usec  
DE 6.50 usec  
TE 298.2 K  
D1 1.00000000 sec  
TDO 1

===== CHANNEL f1 =====  
NUC1 1H  
P1 10.00 usec  
PL1 9.20 dB  
SFO1 299.5718500 MHz

F2 - Processing parameters  
SI 32768  
SF 299.5700030 MHz  
WDW EM  
SSB 0  
LB 0.30 Hz  
GB 0  
PC 1.00

10 9 8 7 6 5 4 3 2 1 0 ppm

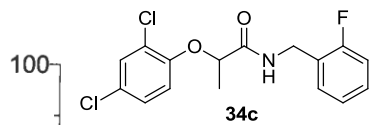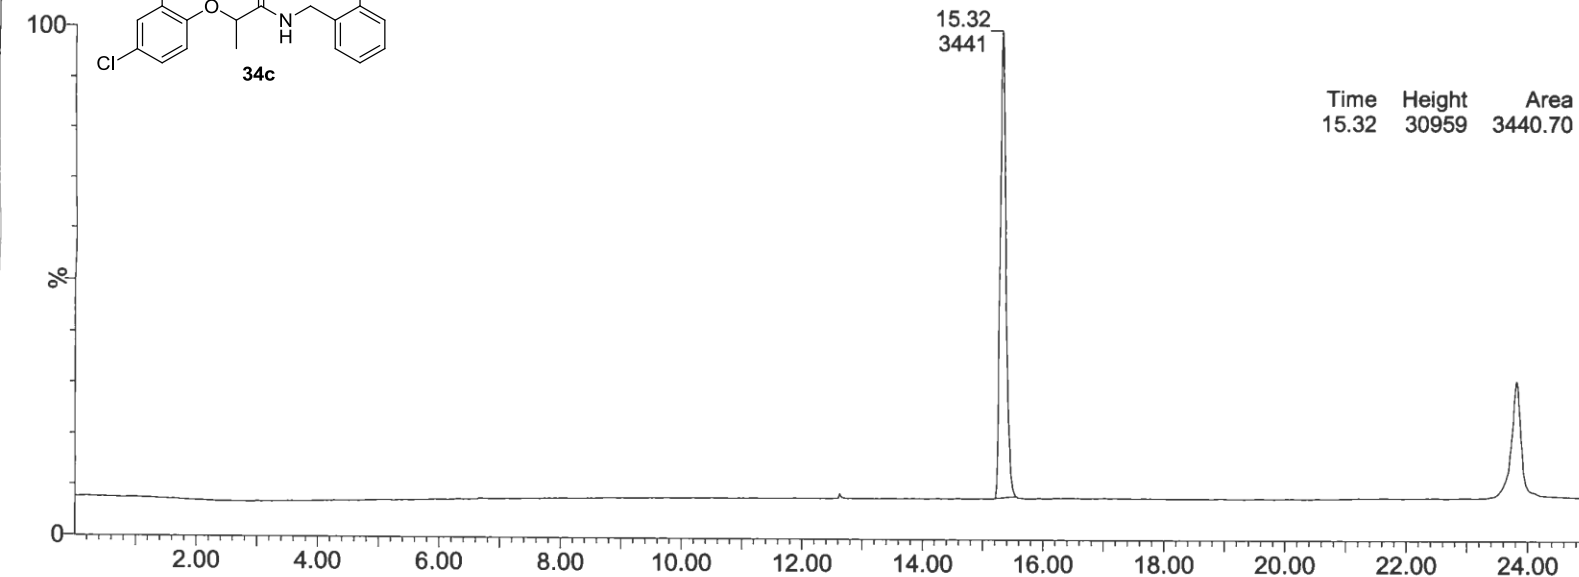

ELSD  
An2  
3.37e4

| Time  | Height | Area    | Area%  |
|-------|--------|---------|--------|
| 15.32 | 30959  | 3440.70 | 100.00 |

1962 Sm (Mn, 1x2)

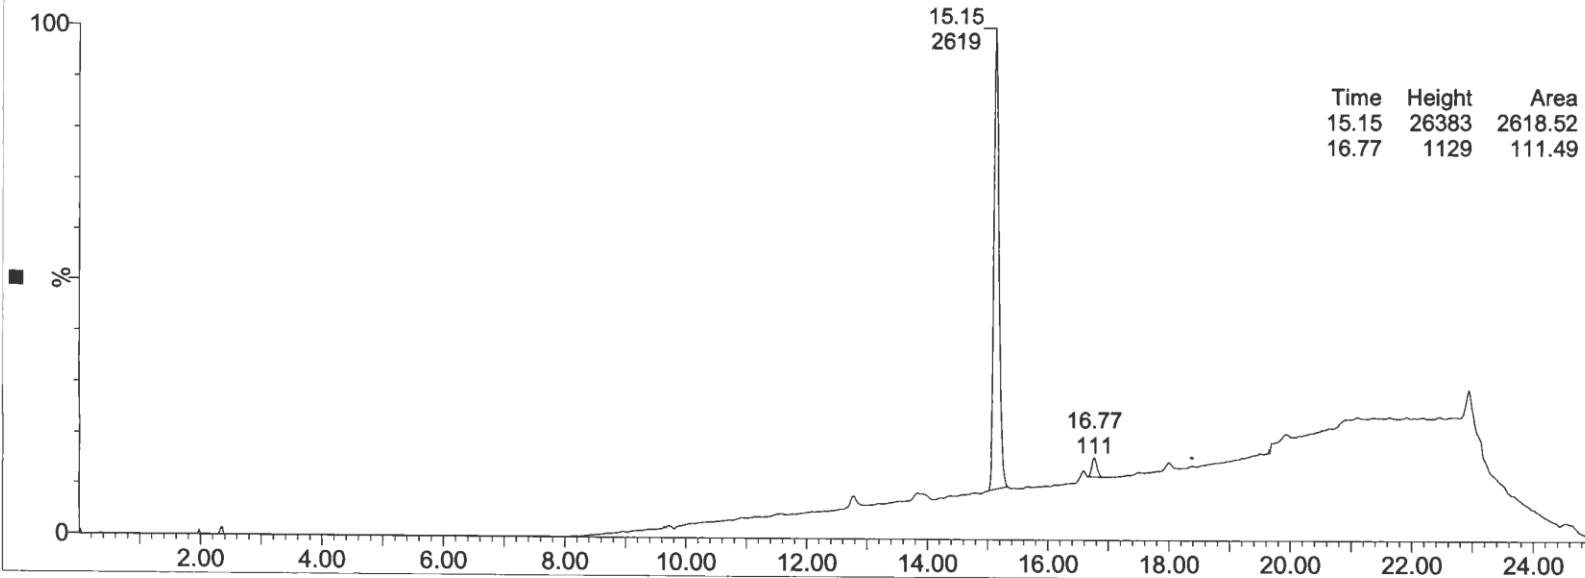

UV  
An1  
2.93e4

| Time  | Height | Area    | Area% |
|-------|--------|---------|-------|
| 15.15 | 26383  | 2618.52 | 95.92 |
| 16.77 | 1129   | 111.49  | 4.08  |



1: Scan ES+  
2.52e7

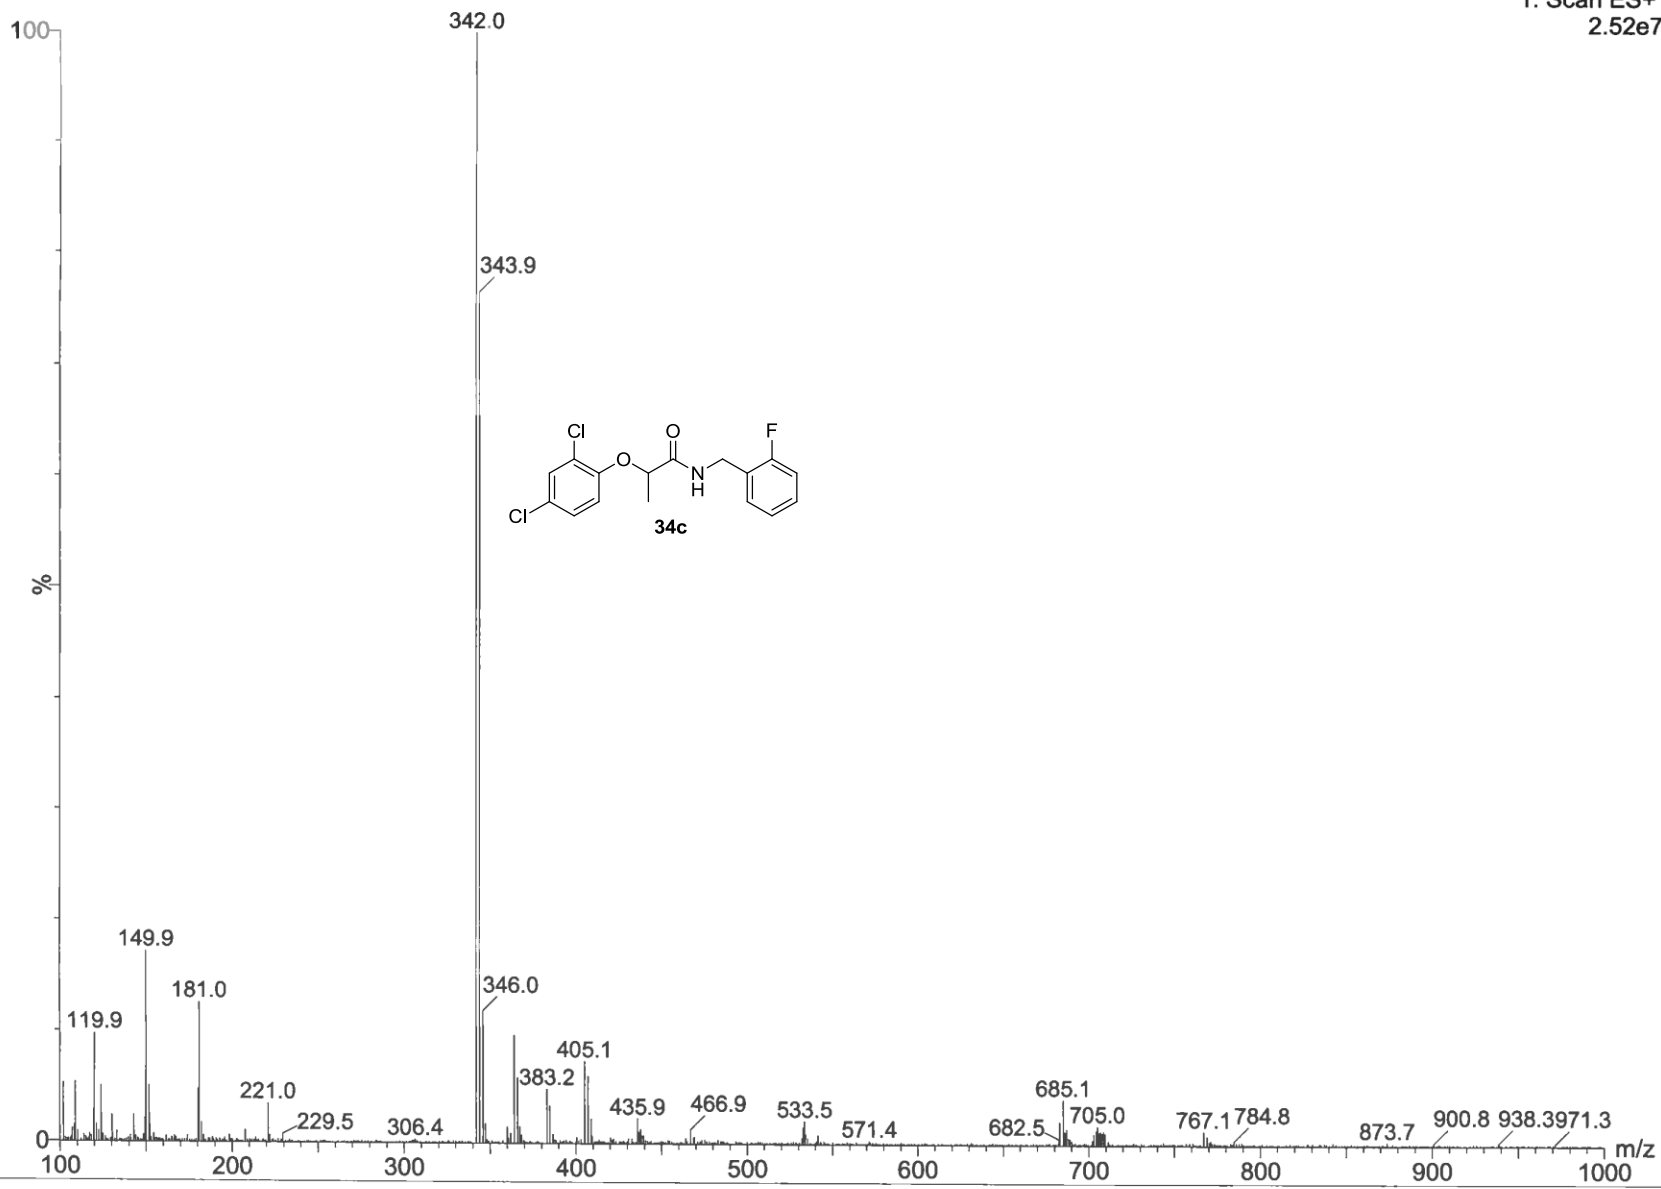

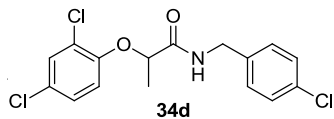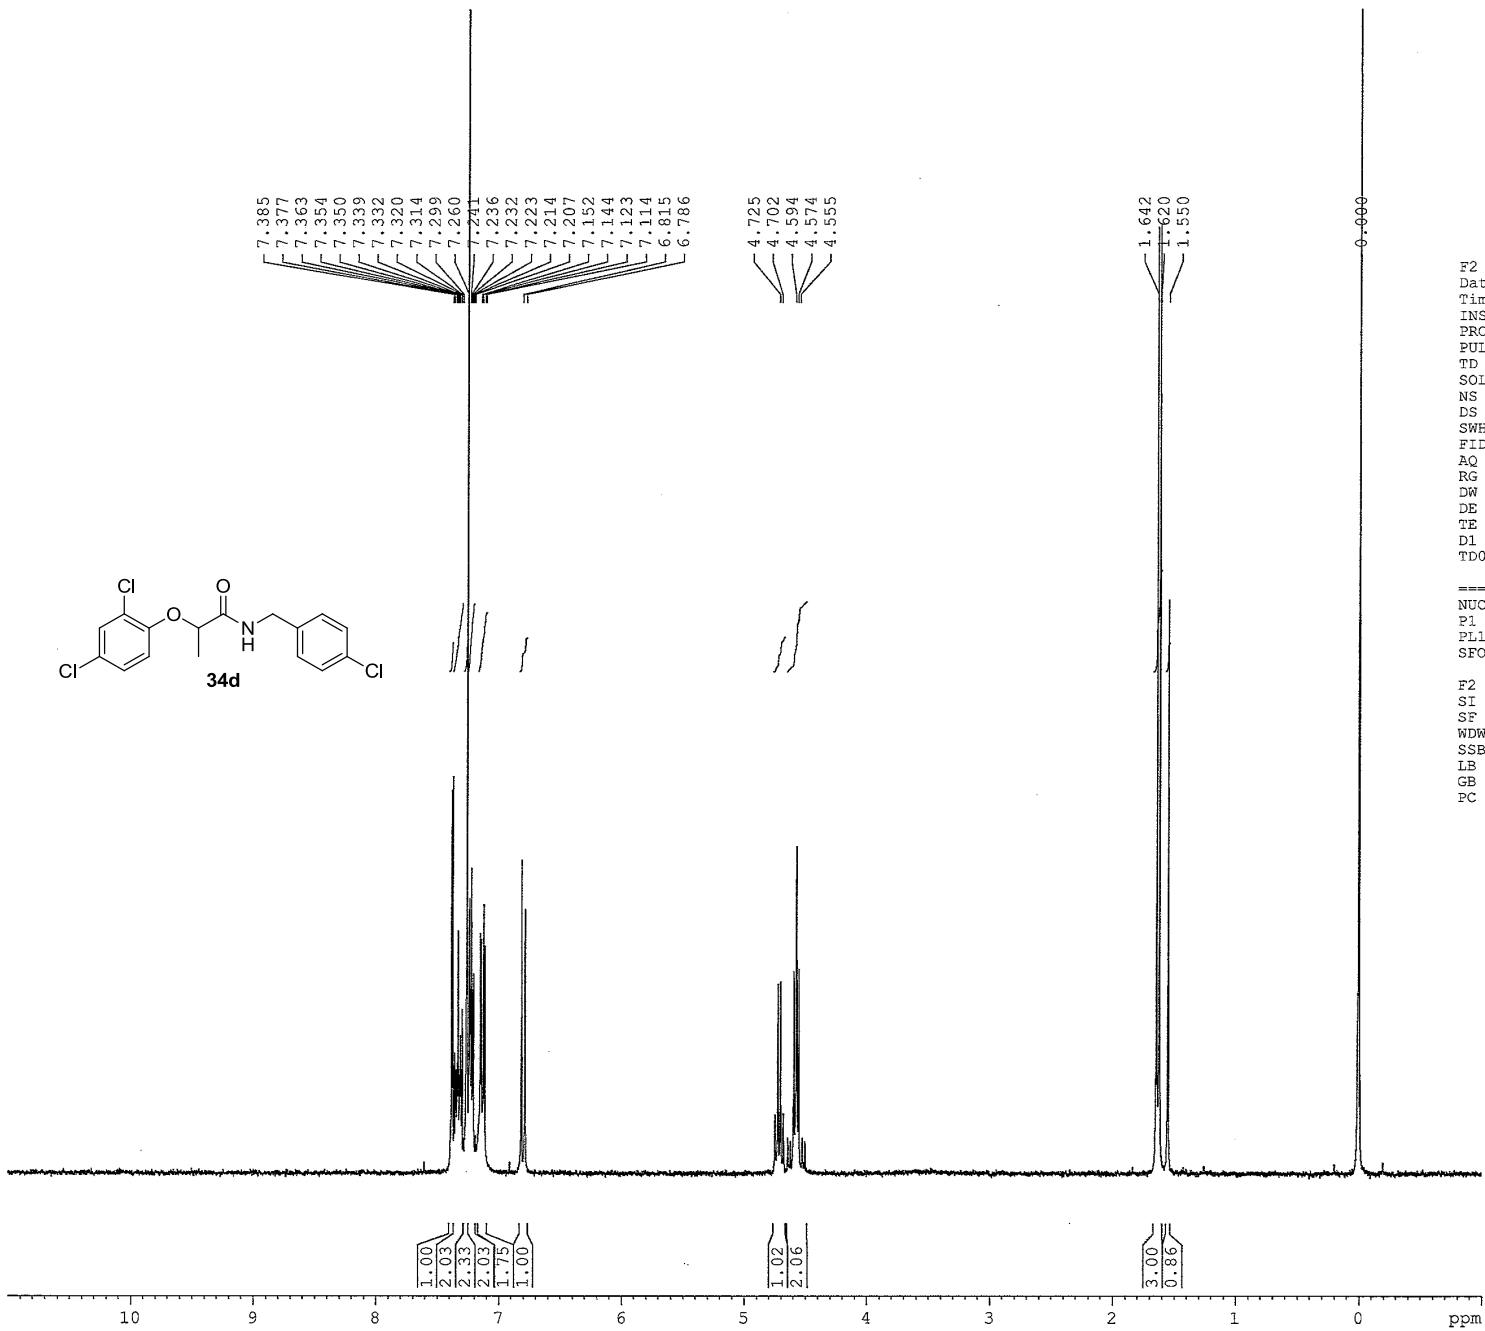

F2 - Acquisition Parameters

Date 20100430  
 Time 13.59  
 INSTRUM spect  
 PROBHD 5 mm BBO BB-1H  
 PULPROG zg30  
 TD 65536  
 SOLVENT CDCl3  
 NS 16  
 DS 2  
 SWH 6172.839 Hz  
 PIDRES 0.094190 Hz  
 AQ 5.3084660 sec  
 RG 2580.3  
 DW 81.000 usec  
 DE 6.50 usec  
 TE 298.2 K  
 DL 1.00000000 sec  
 TDO 1

----- CHANNEL f1 -----

NUC1 1H  
 P1 10.00 usec  
 PL1 9.20 dB  
 SFO1 299.5718500 MHz

F2 - Processing parameters

SI 32768  
 SF 299.5700030 MHz  
 WDW EM  
 SSB 0  
 LB 0.30 Hz  
 GB 0  
 PC 1.00

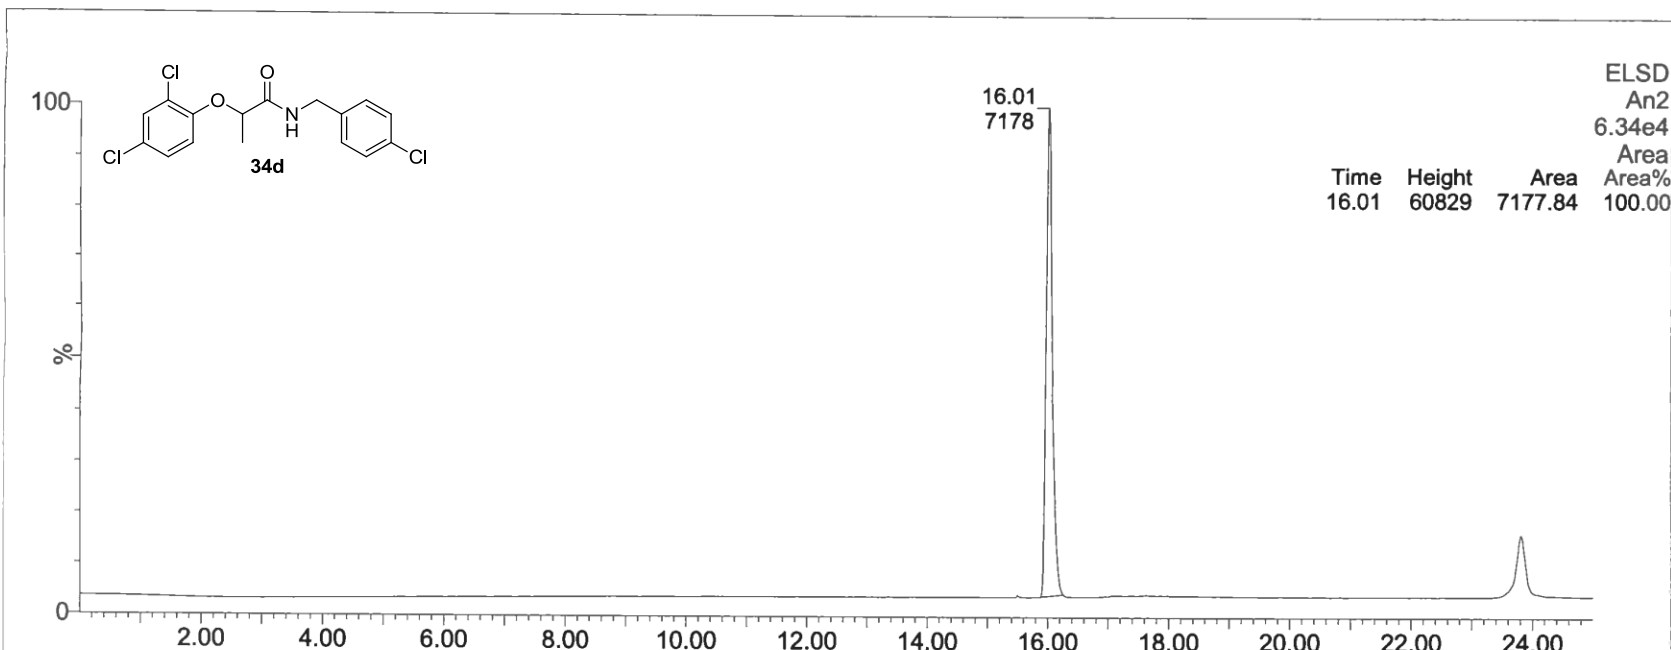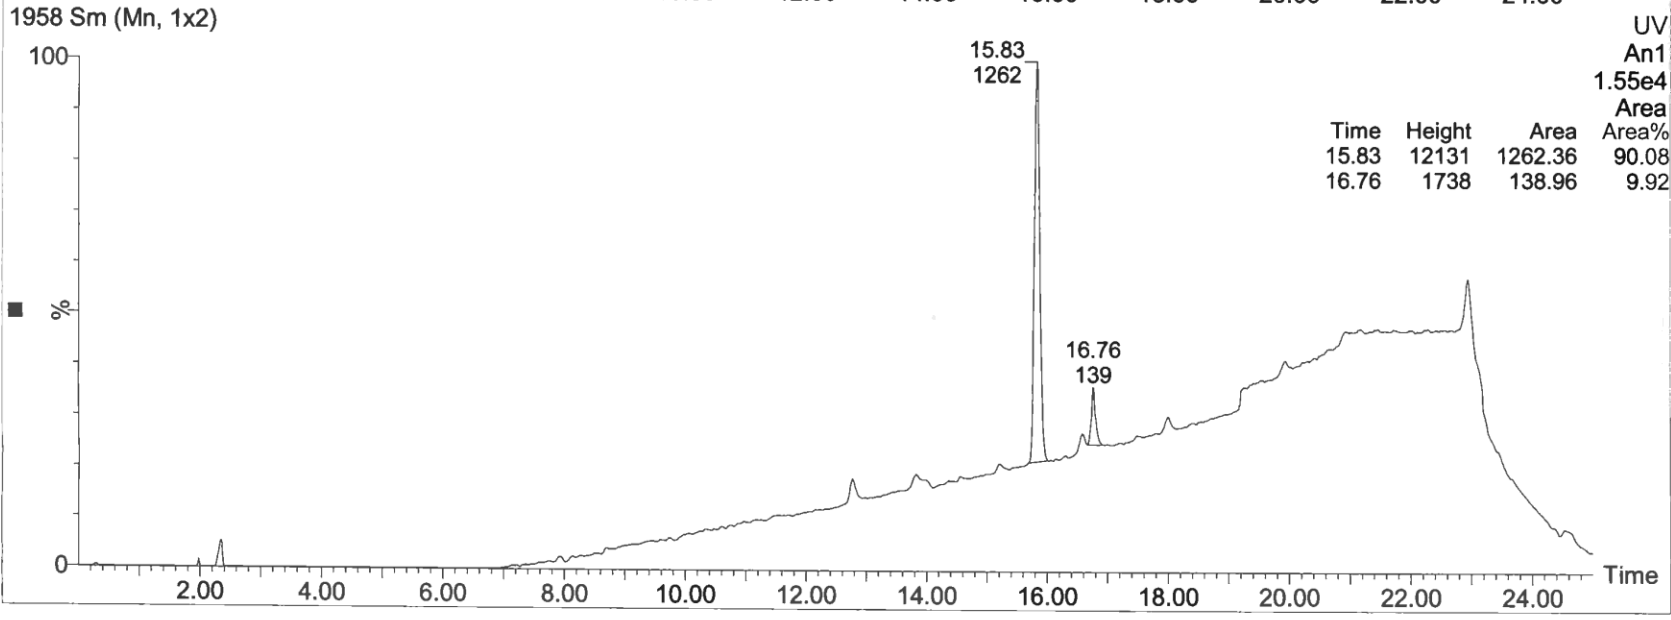

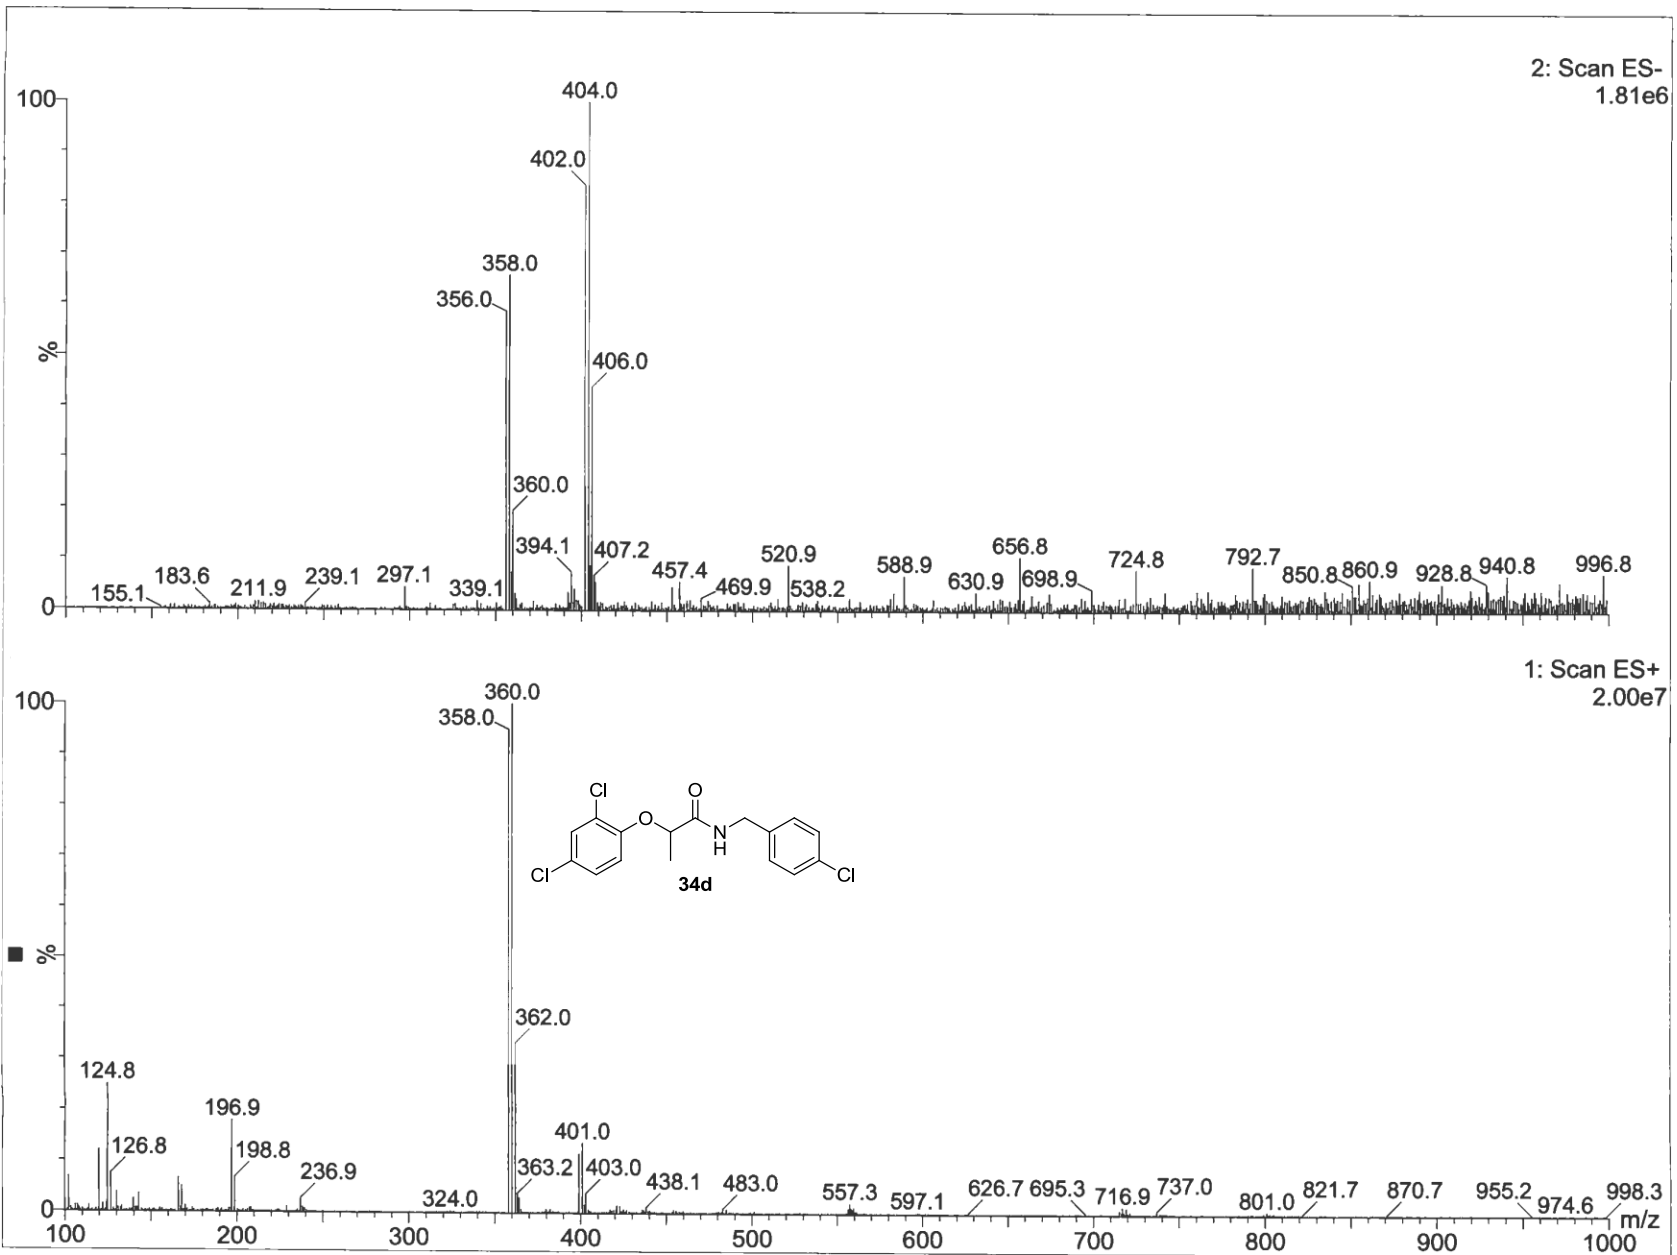

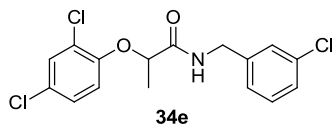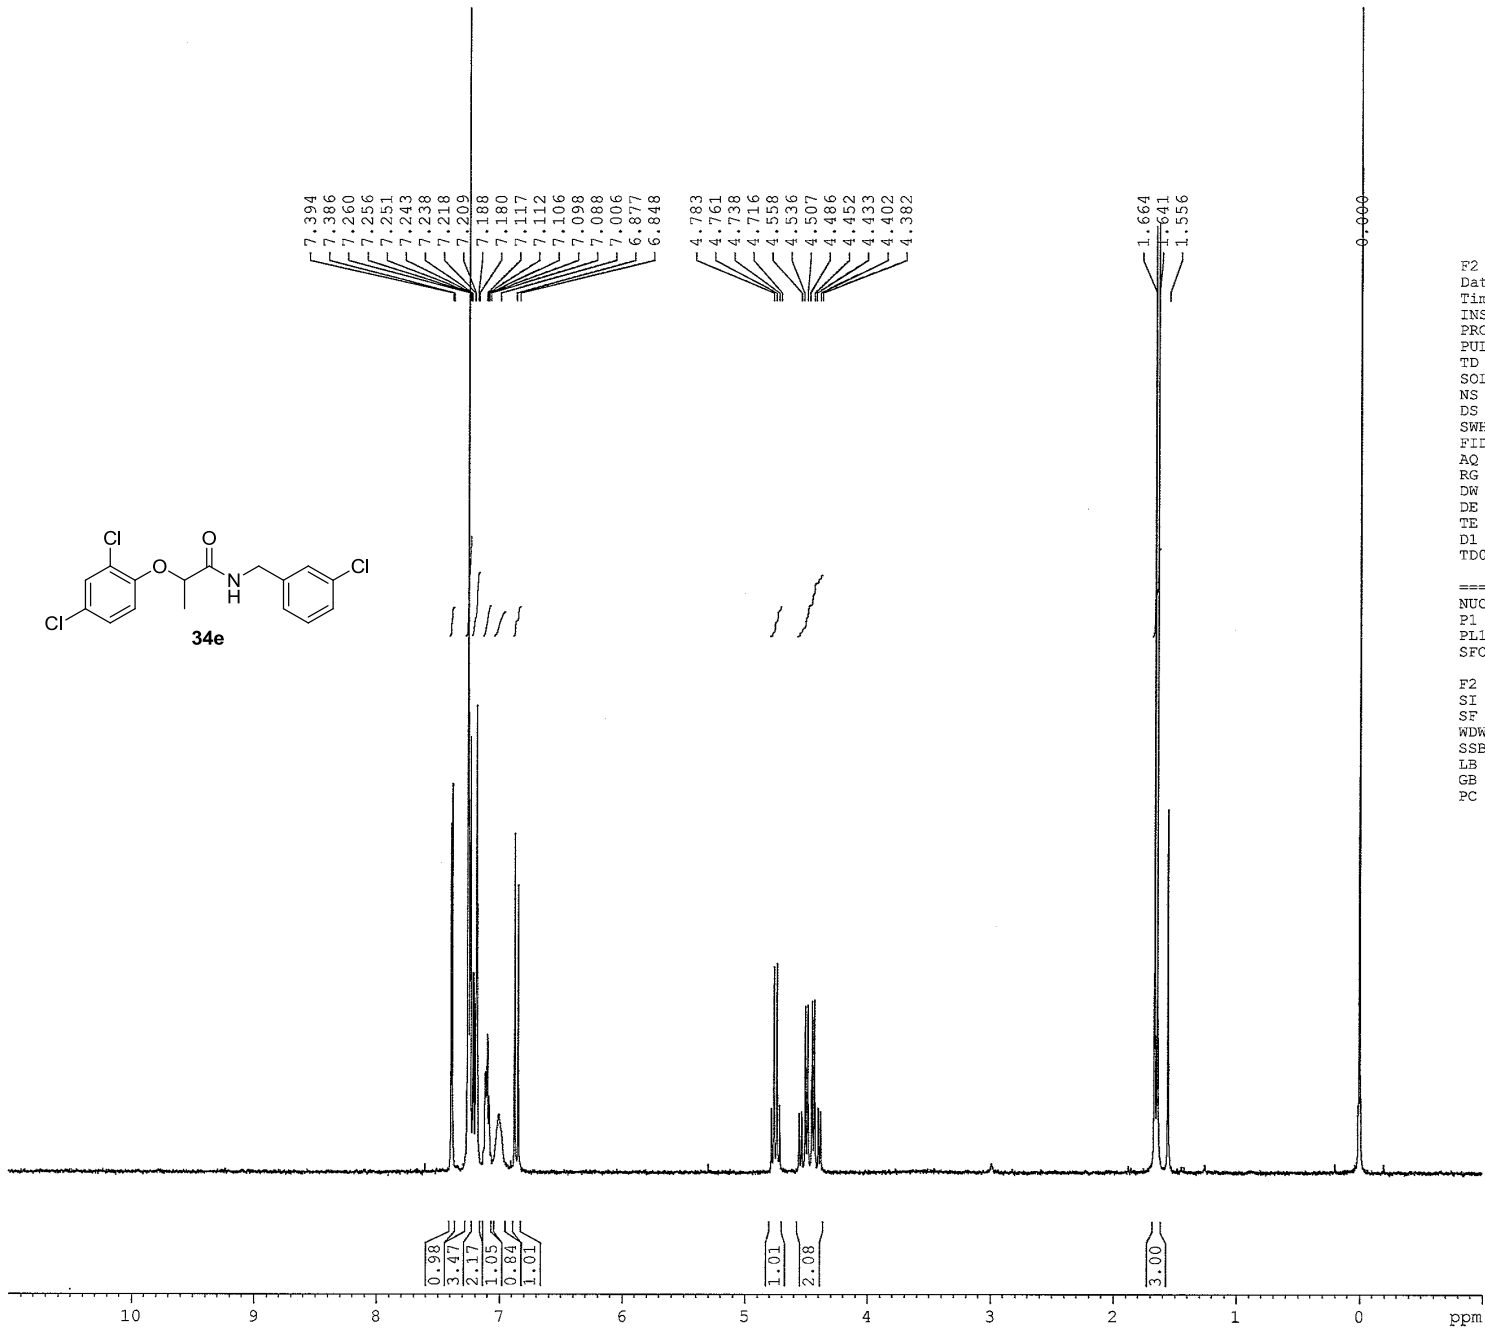

7.394  
7.386  
7.260  
7.256  
7.251  
7.243  
7.238  
7.218  
7.209  
7.188  
7.180  
7.117  
7.112  
7.106  
7.098  
7.088  
7.006  
6.877  
6.848

4.783  
4.761  
4.738  
4.716  
4.558  
4.536  
4.507  
4.486  
4.452  
4.433  
4.402  
4.382

1.664  
1.641  
1.556

0.000

F2 - Acquisition Parameters

Date\_ 20100430  
Time\_ 14.10  
INSTRUM spect  
PROBHD 5 mm BBO BB-1H  
PULPROG zg30  
TD 65536  
SOLVENT CDCl3  
NS 16  
DS 2  
SWH 6172.839 Hz  
FIDRES 0.094190 Hz  
AQ 5.3084660 sec  
RG 2298.8  
DW 81.000 usec  
DE 6.50 usec  
TE 298.2 K  
D1 1.00000000 sec  
TDO 1

===== CHANNEL f1 =====

NUC1 1H  
P1 10.00 usec  
PL1 9.20 dB  
SFO1 299.5718500 MHz

F2 - Processing parameters

SI 32768  
SF 299.5700032 MHz  
WDW EM  
SSB 0  
LB 0.30 Hz  
GB 0  
PC 1.00

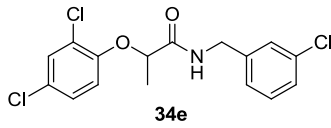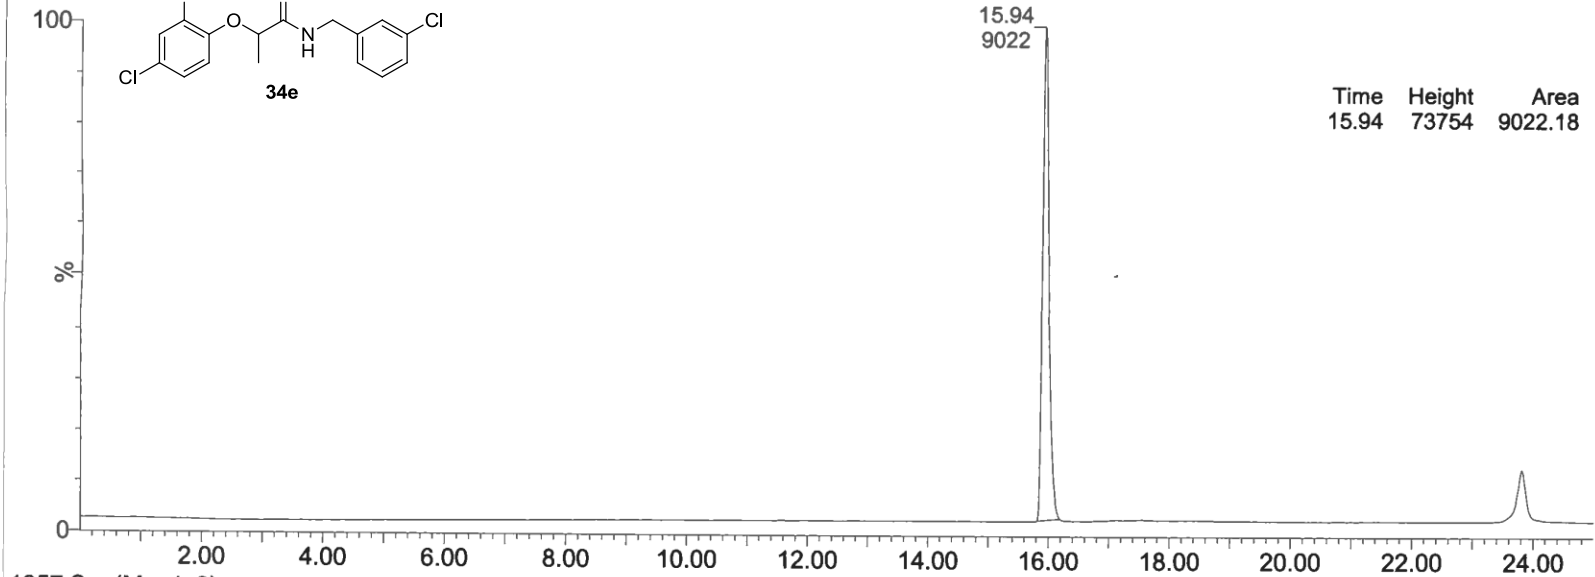

ELSD  
An2  
7.61e4  
Area  
Area%

| Time  | Height | Area    | Area%  |
|-------|--------|---------|--------|
| 15.94 | 73754  | 9022.18 | 100.00 |

1957 Sm (Mn, 1x2)

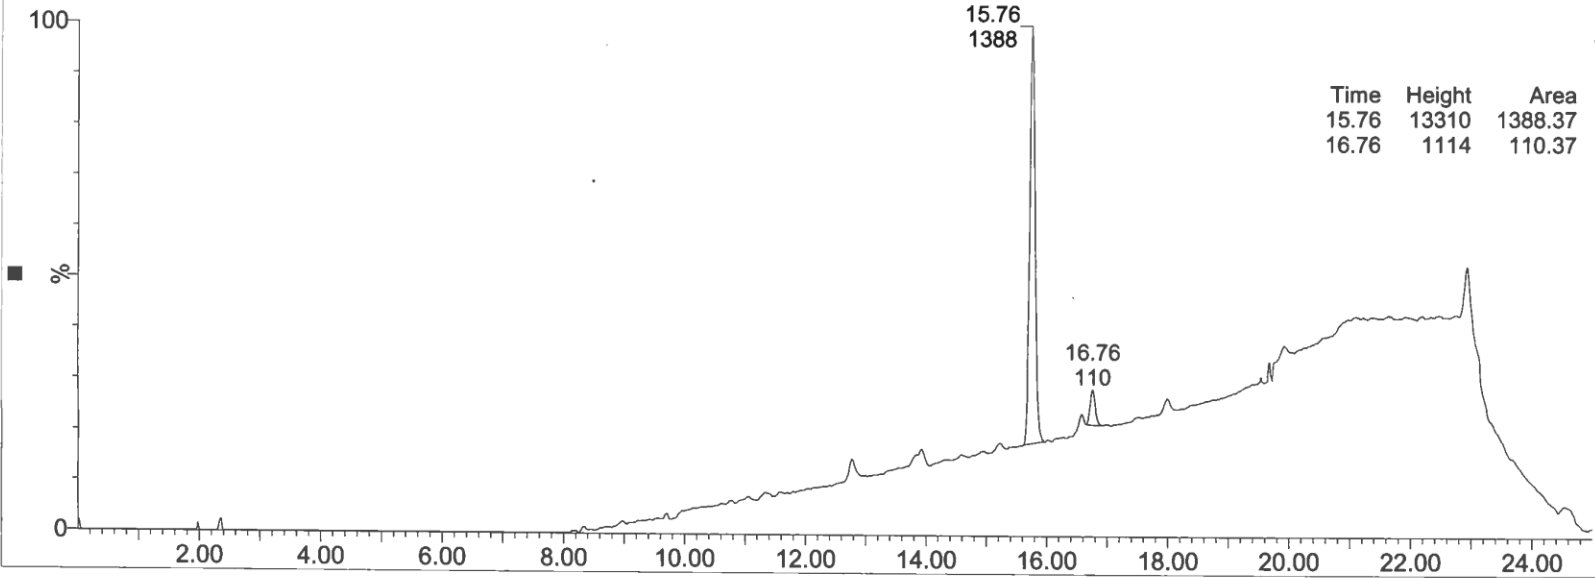

UV  
An1  
1.63e4  
Area  
Area%

| Time  | Height | Area    | Area% |
|-------|--------|---------|-------|
| 15.76 | 13310  | 1388.37 | 92.64 |
| 16.76 | 1114   | 110.37  | 7.36  |

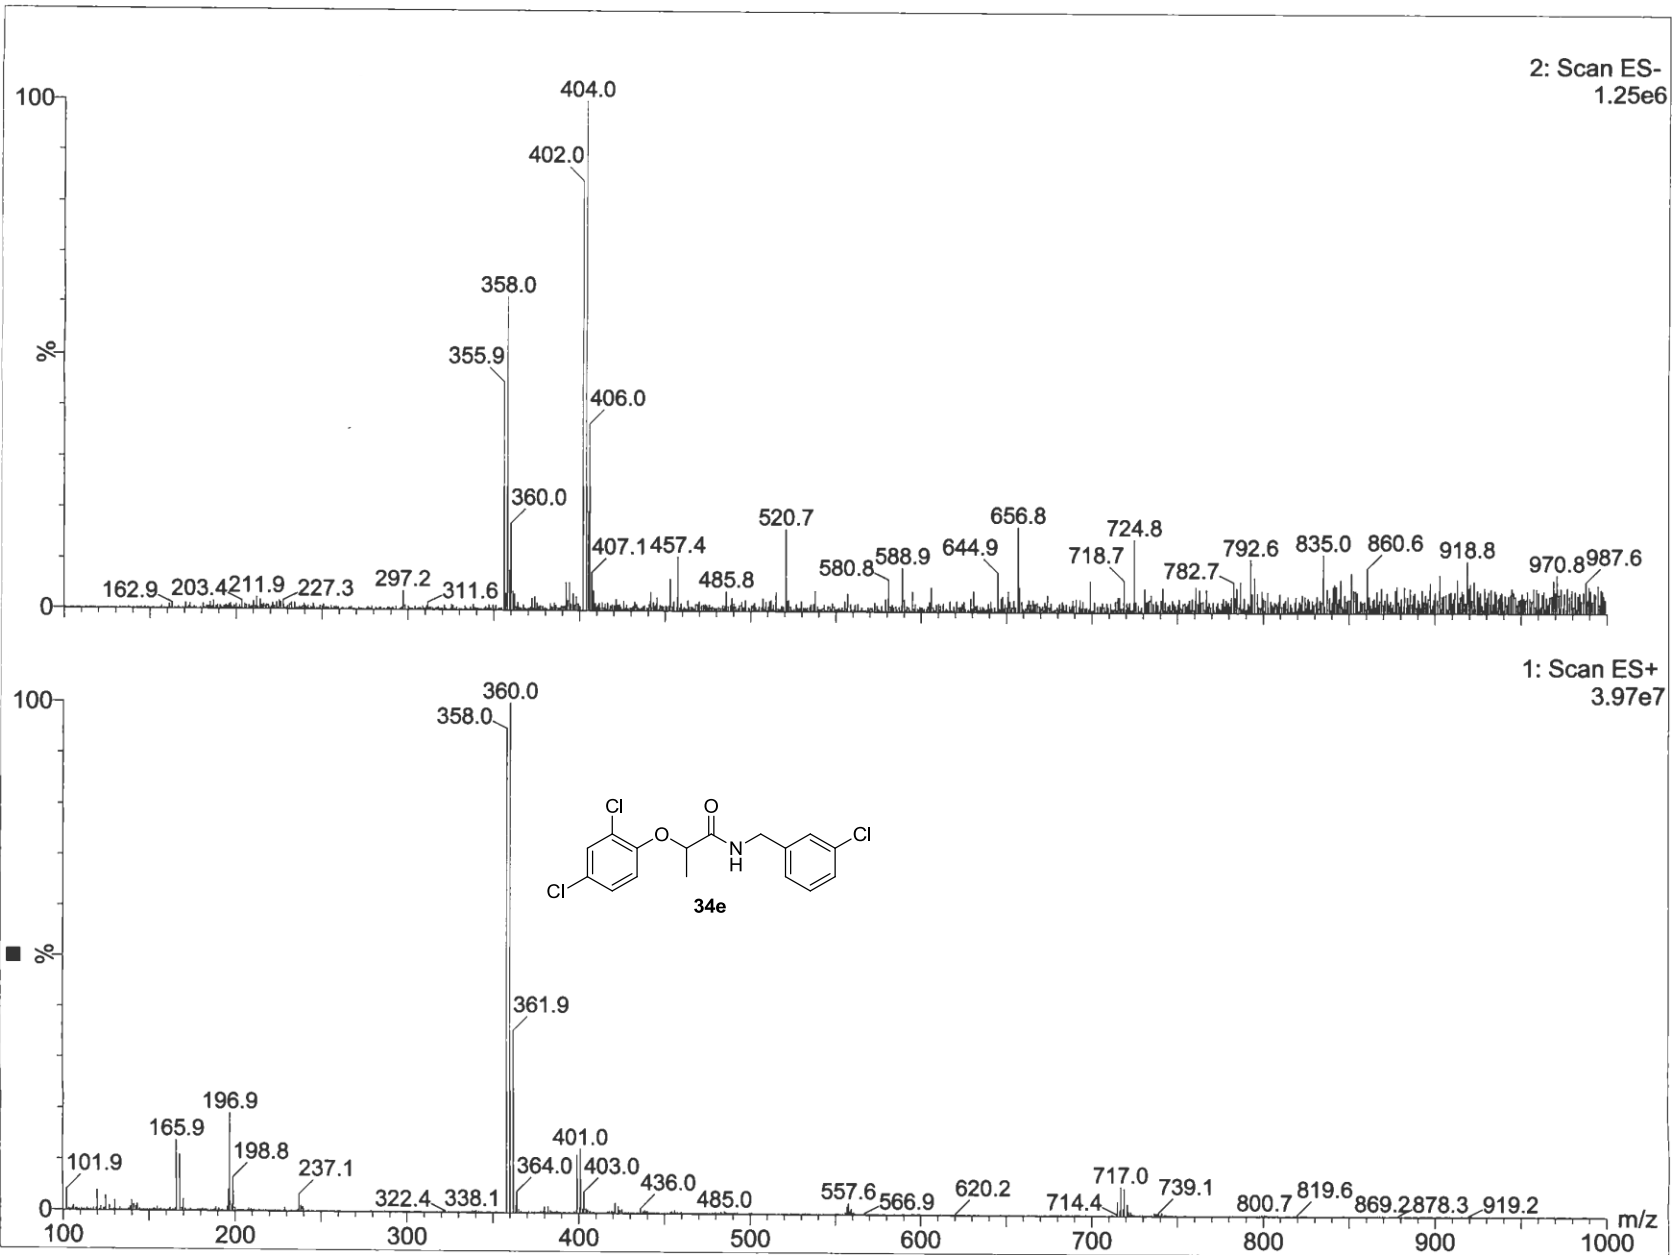

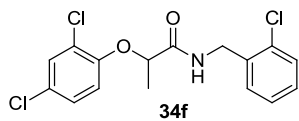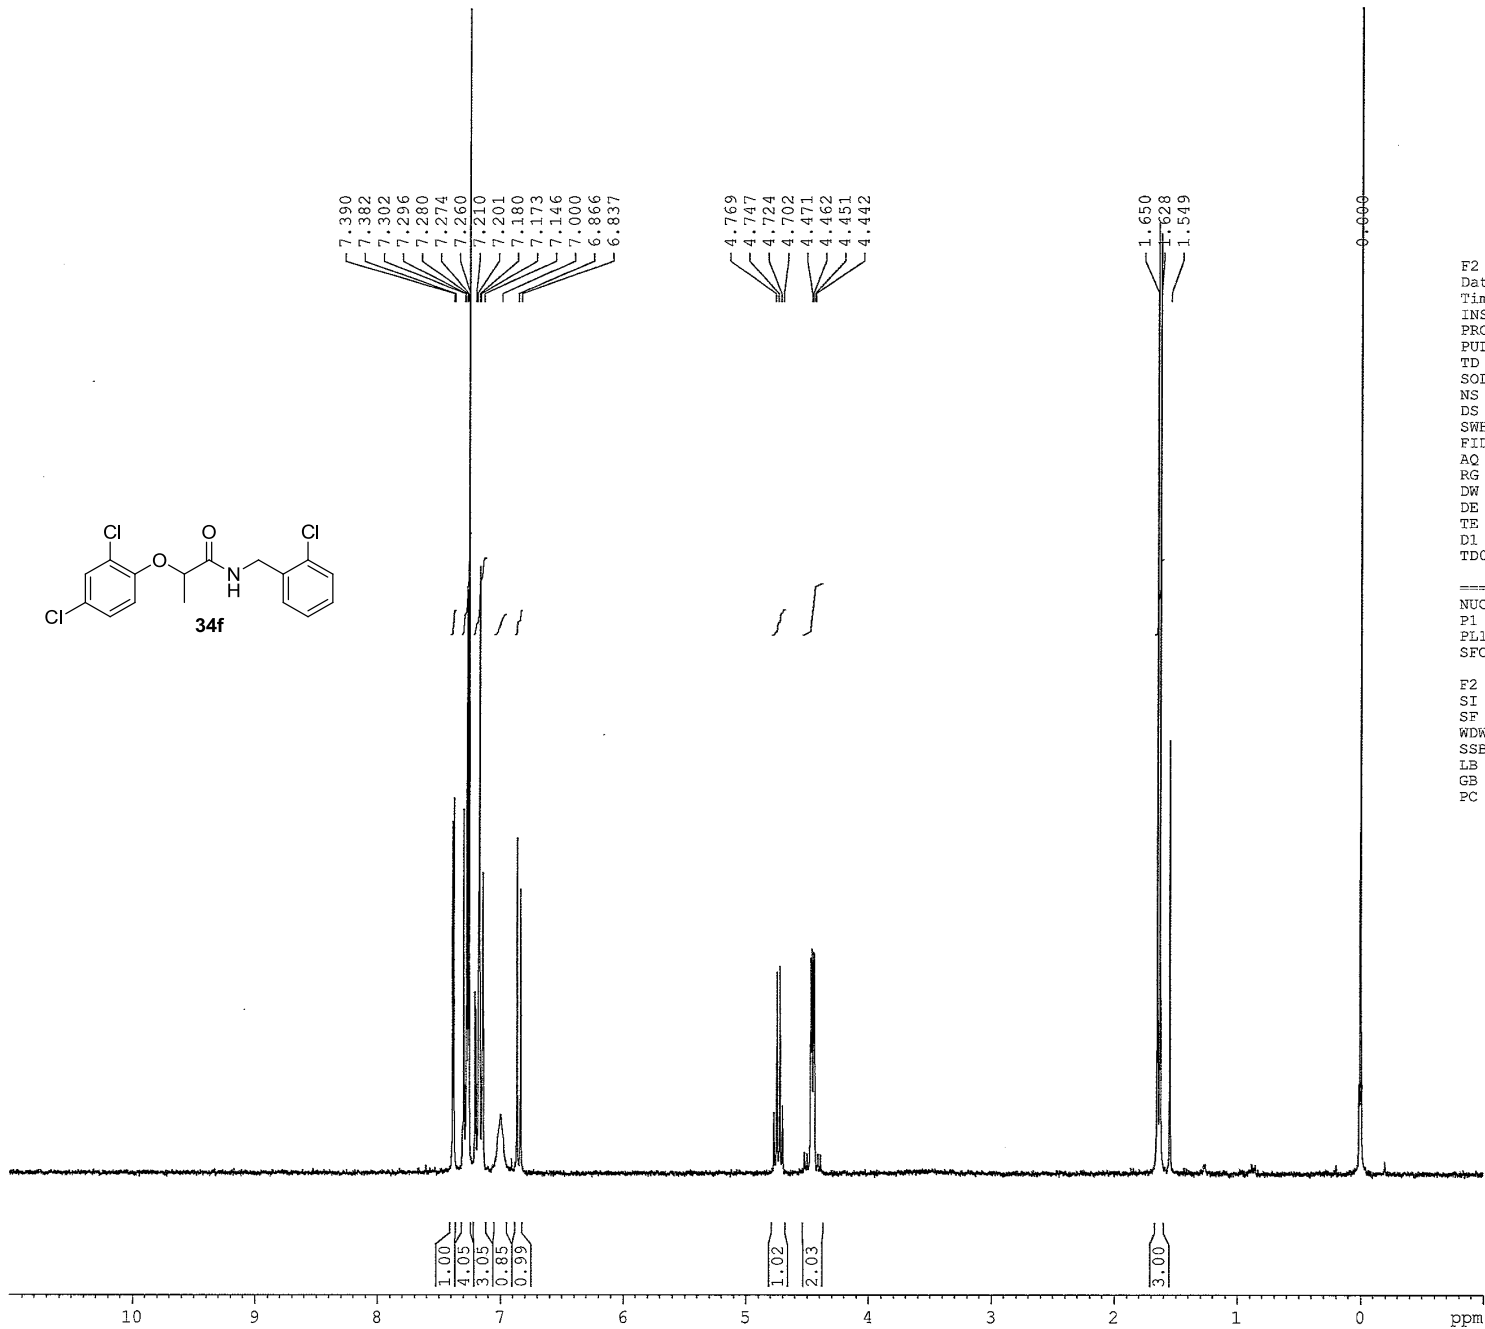

F2 - Acquisition Parameters  
 Date\_ 20100430  
 Time 14.20  
 INSTRUM spect  
 PROBHD 5 mm BBO BB-1H  
 PULPROG zg30  
 TD 65536  
 SOLVENT CDCl3  
 NS 16  
 DS 2  
 SWH 6172.839 Hz  
 FIDRES 0.094190 Hz  
 AQ 5.3084660 sec  
 RG 2580.3  
 DW 81.000 usec  
 DE 6.50 usec  
 TE 298.2 K  
 D1 1.00000000 sec  
 TD0 1

===== CHANNEL f1 =====  
 NUC1 1H  
 P1 10.00 usec  
 PL1 9.20 dB  
 SFO1 299.5718500 MHz

F2 - Processing parameters  
 SI 32768  
 SF 299.5700032 MHz  
 WDW EM  
 SSB 0  
 LB 0.30 Hz  
 GB 0  
 PC 1.00



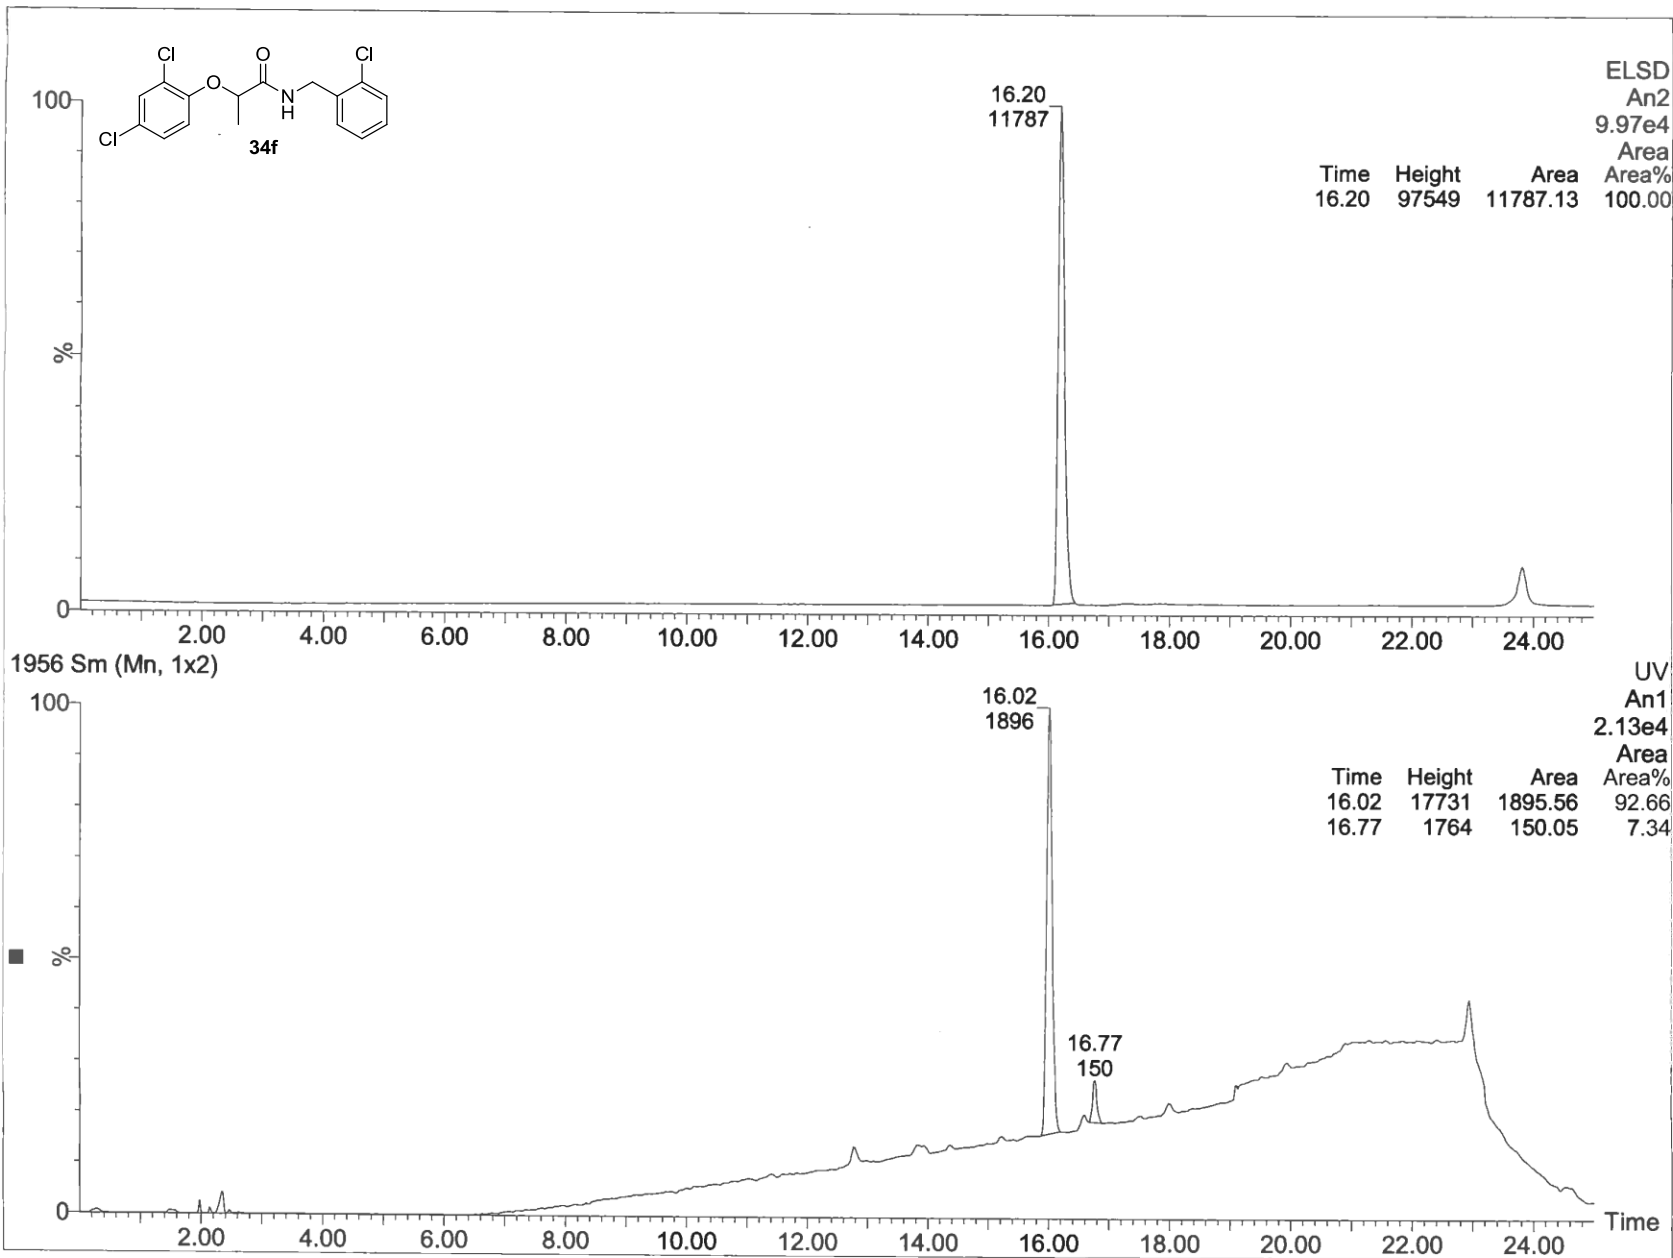

1: Scan ES+  
4.14e7

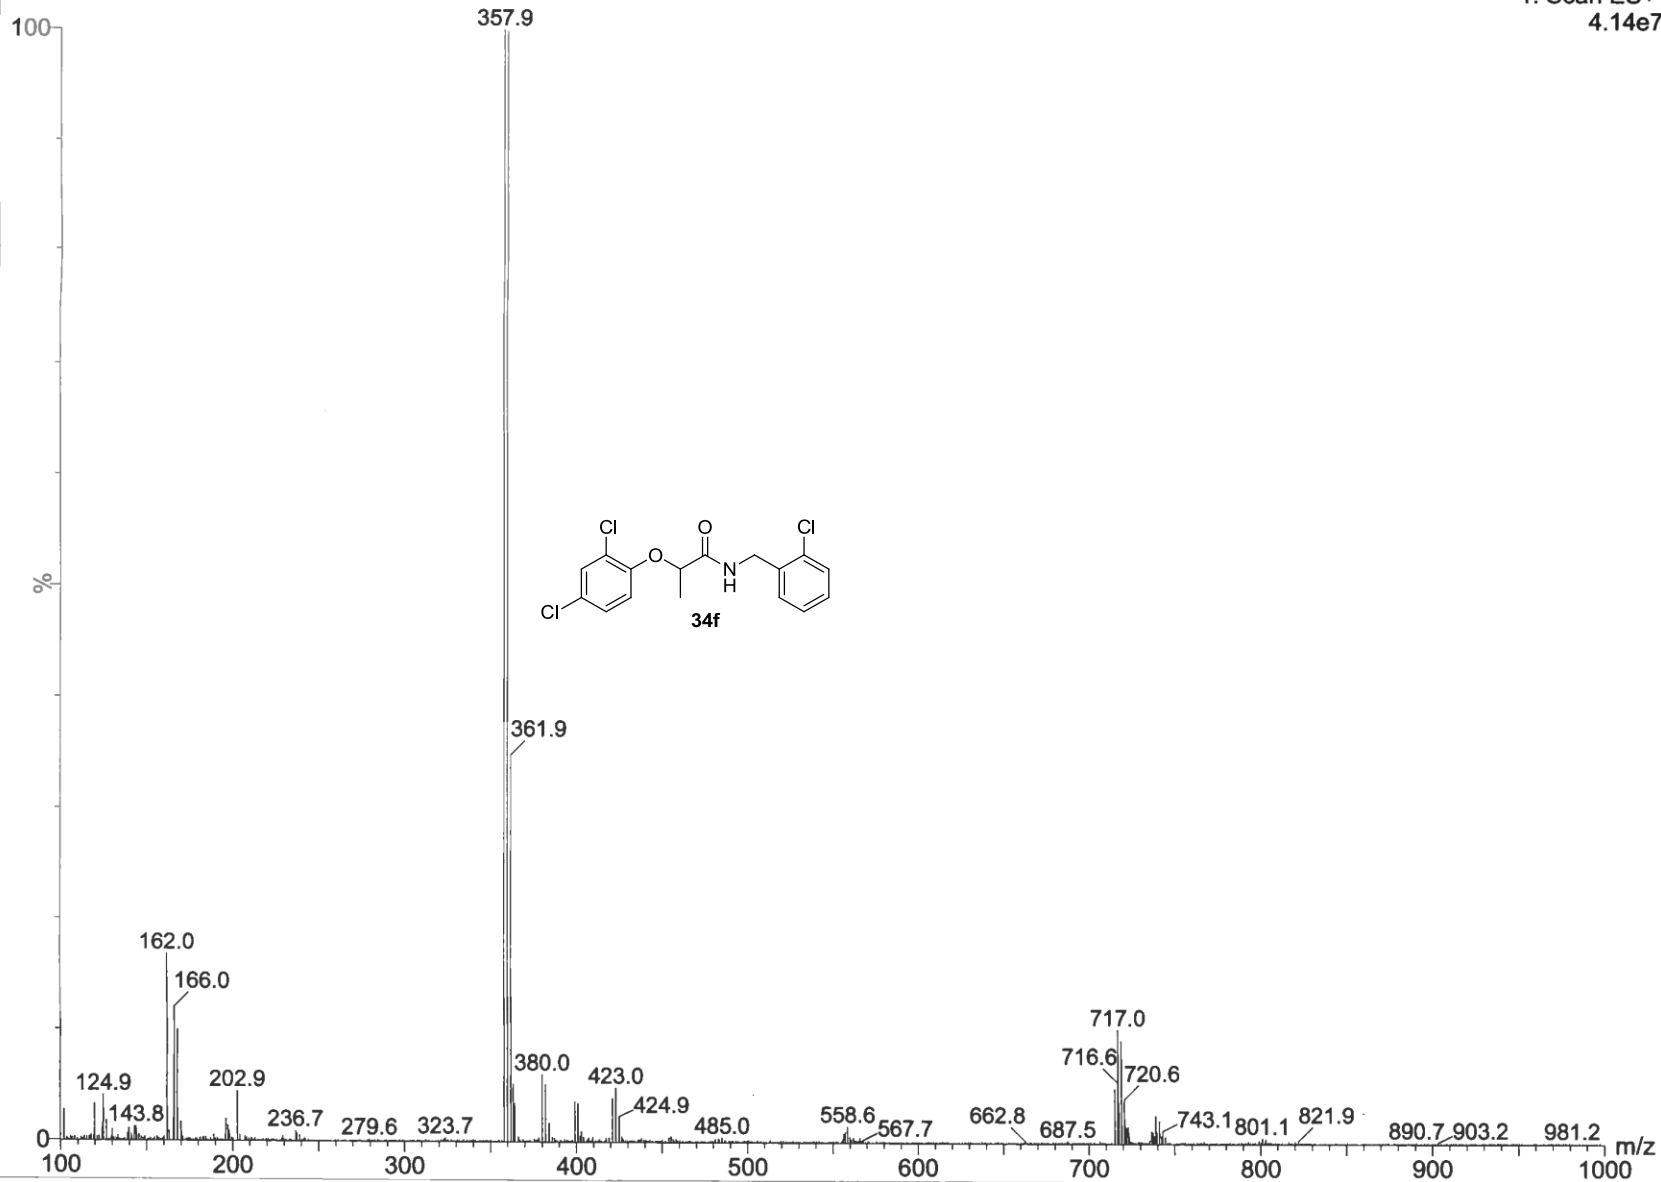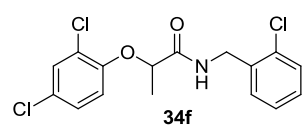

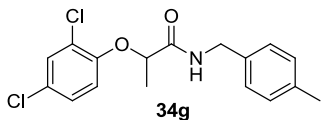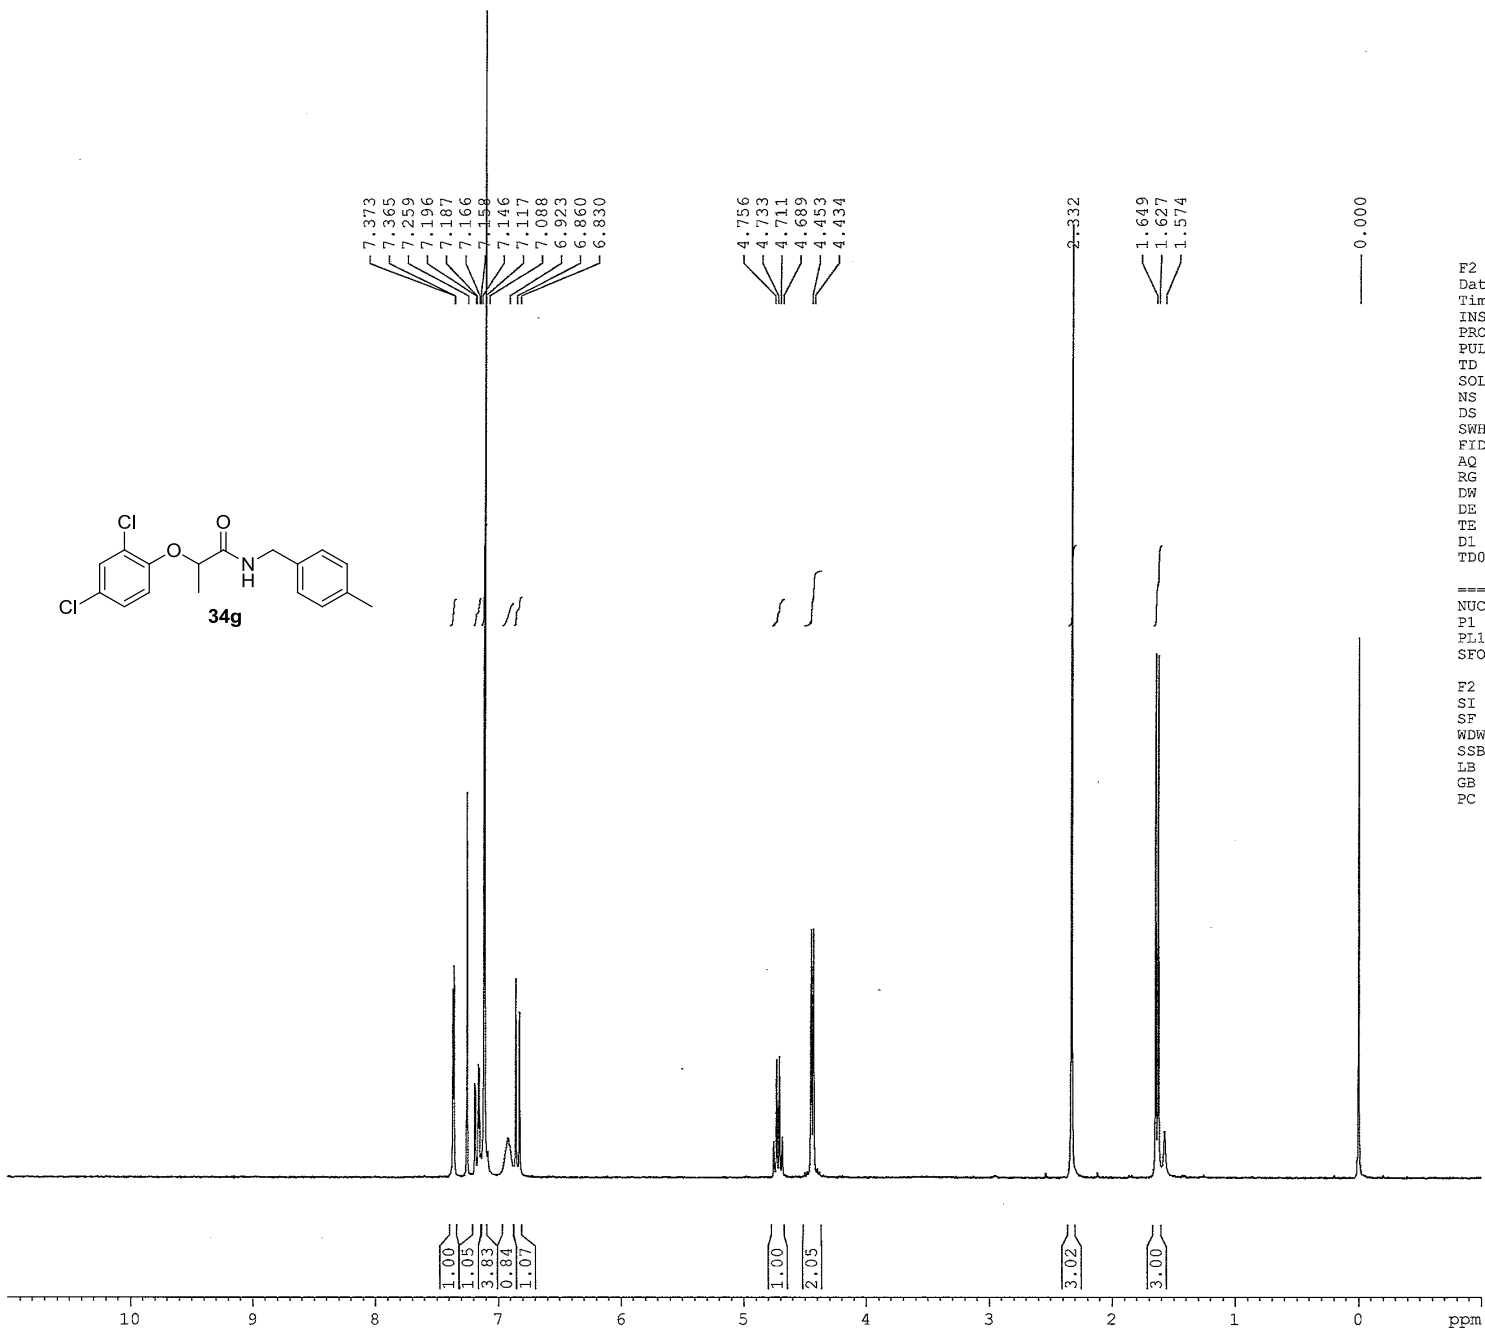

F2 - Acquisition Parameters  
 Date\_ 20100511  
 Time\_ 11.03  
 INSTRUM spect  
 PROBHD 5 mm BBO BB-1H  
 PULPROG zg30  
 TD 65536  
 SOLVENT CDCl3  
 NS 16  
 DS 2  
 SWH 6172.839 Hz  
 FIDRES 0.094190 Hz  
 AQ 5.3084660 sec  
 RG 1290.2  
 DW 81.000 usec  
 DE 6.50 usec  
 TE 298.2 K  
 DL 1.00000000 sec  
 TDO 1

===== CHANNEL f1 =====  
 NUC1 1H  
 P1 10.00 usec  
 PL1 9.20 dB  
 SFO1 299.5718500 MHz

F2 - Processing parameters  
 SI 32768  
 SF 299.5700036 MHz  
 WDW EM  
 SSB 0  
 LB 0.30 Hz  
 GB 0  
 PC 1.00

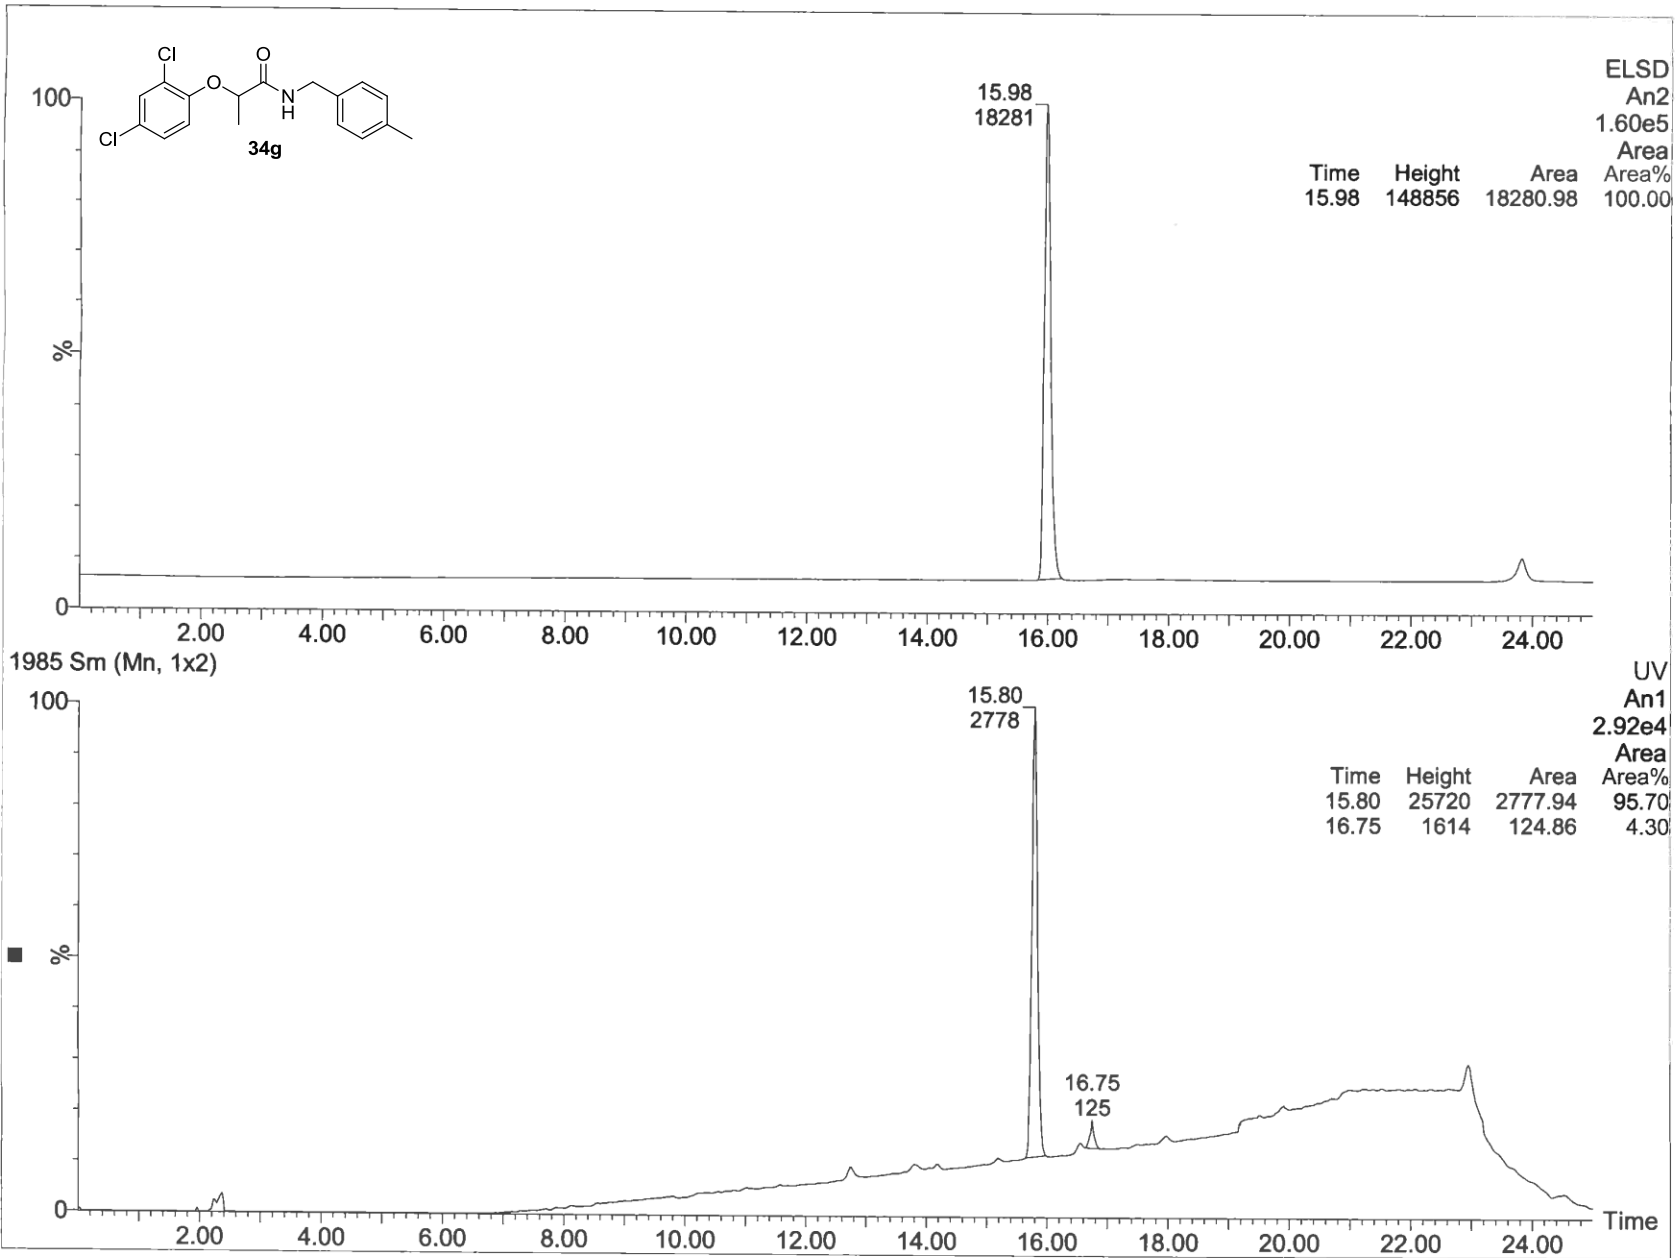

1: Scan ES+  
3.25e7

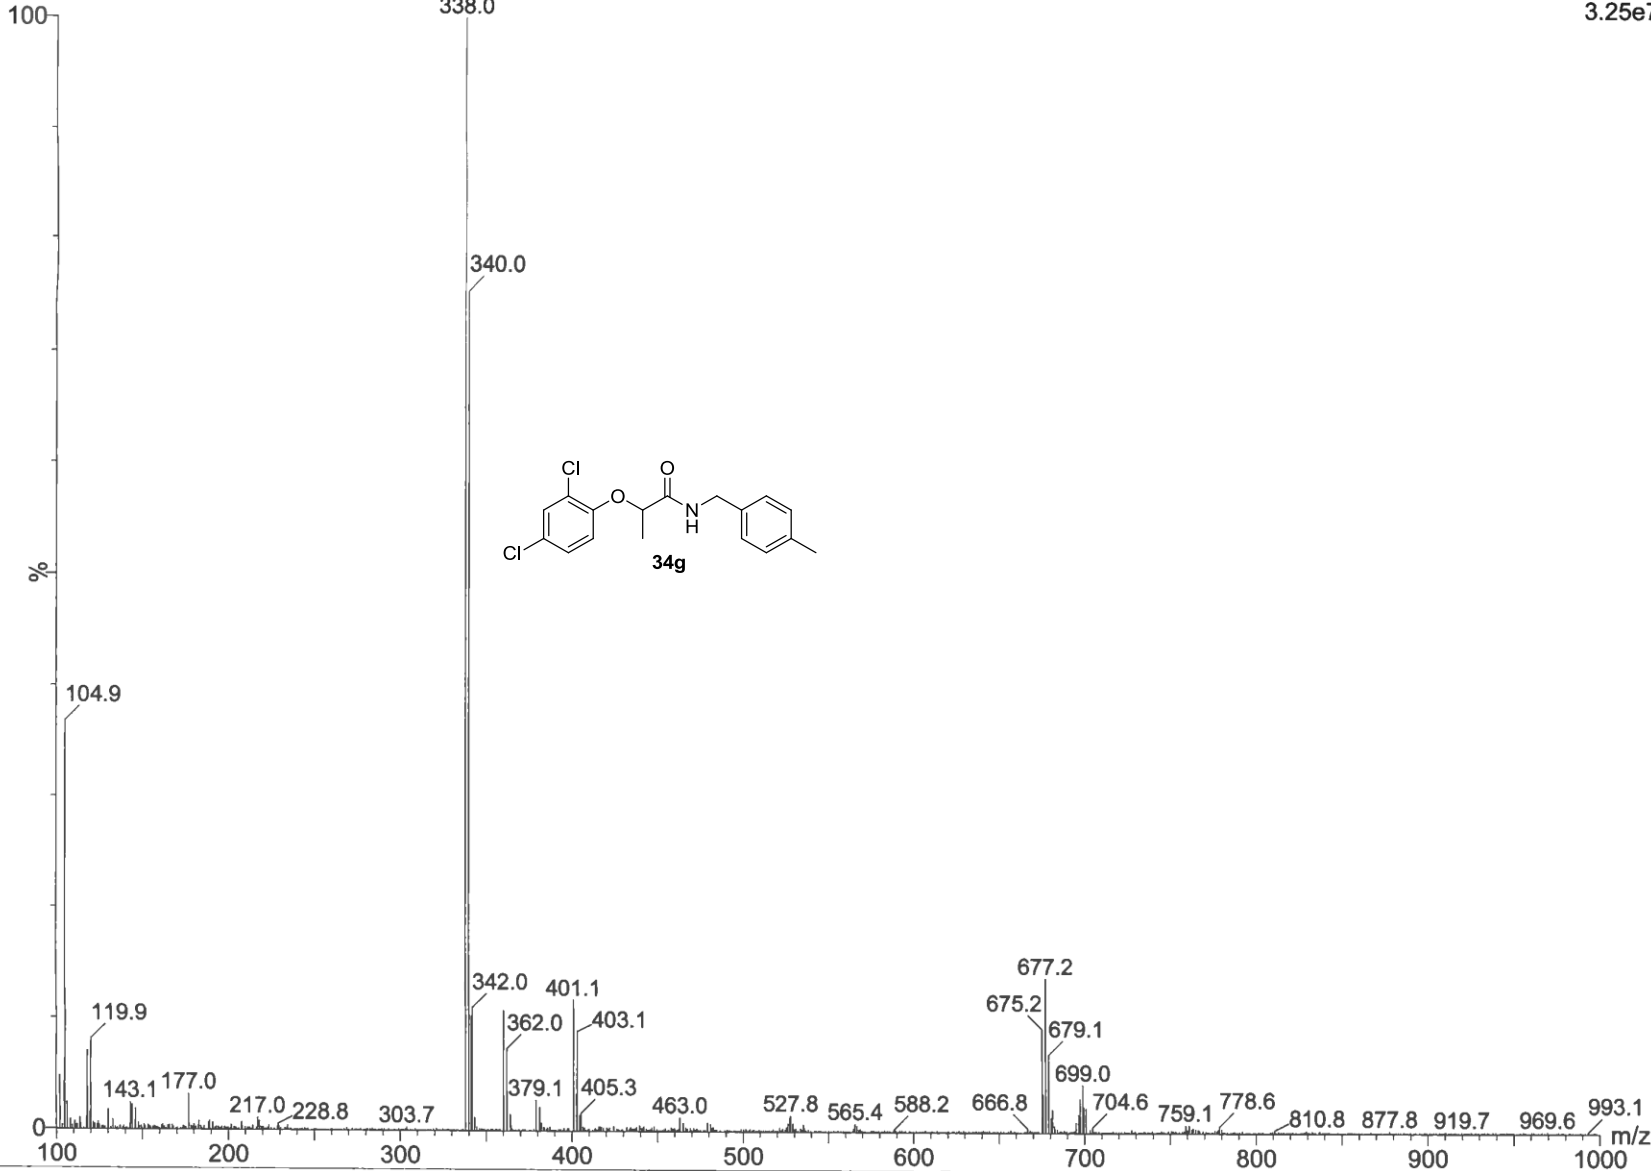

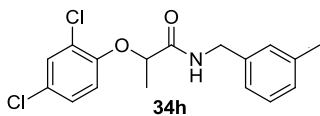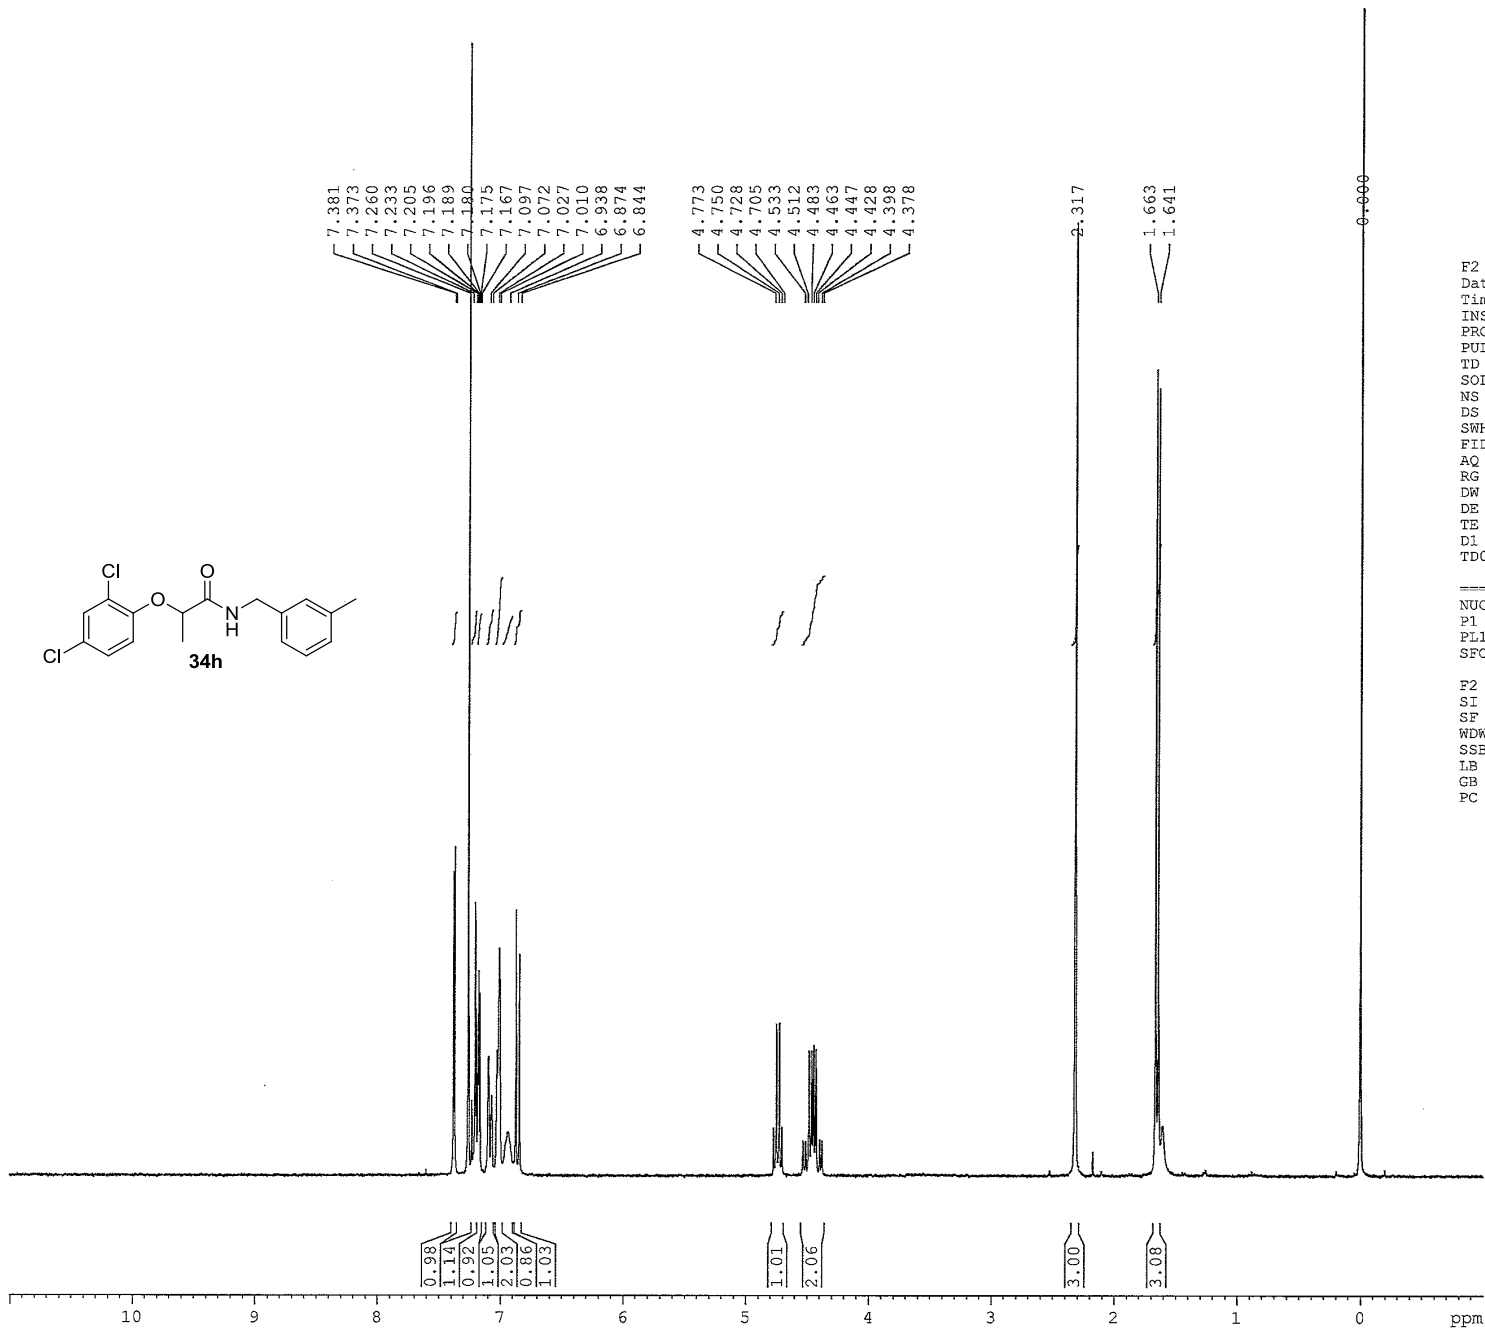

F2 - Acquisition Parameters  
 Date 20100422  
 Time 14.32  
 INSTRUM spect  
 PROBHD 5 mm BBO BB-1H  
 PULPROG zg30  
 TD 65536  
 SOLVENT CDCl3  
 NS 16  
 DS 2  
 SWH 6172.839 Hz  
 FIDRES 0.094190 Hz  
 AQ 5.3084660 sec  
 RG 2048  
 DW 81.000 usec  
 DE 6.50 usec  
 TE 295.9 K  
 DI 1.00000000 sec  
 TDO 1

===== CHANNEL f1 =====  
 NUCL 1H  
 P1 10.00 usec  
 PL1 9.20 dB  
 SFO1 299.5718500 MHz

F2 - Processing parameters  
 SI 32768  
 SF 299.5700031 MHz  
 WDW EM  
 SSB 0  
 LB 0.30 Hz  
 GB 0  
 PC 1.00

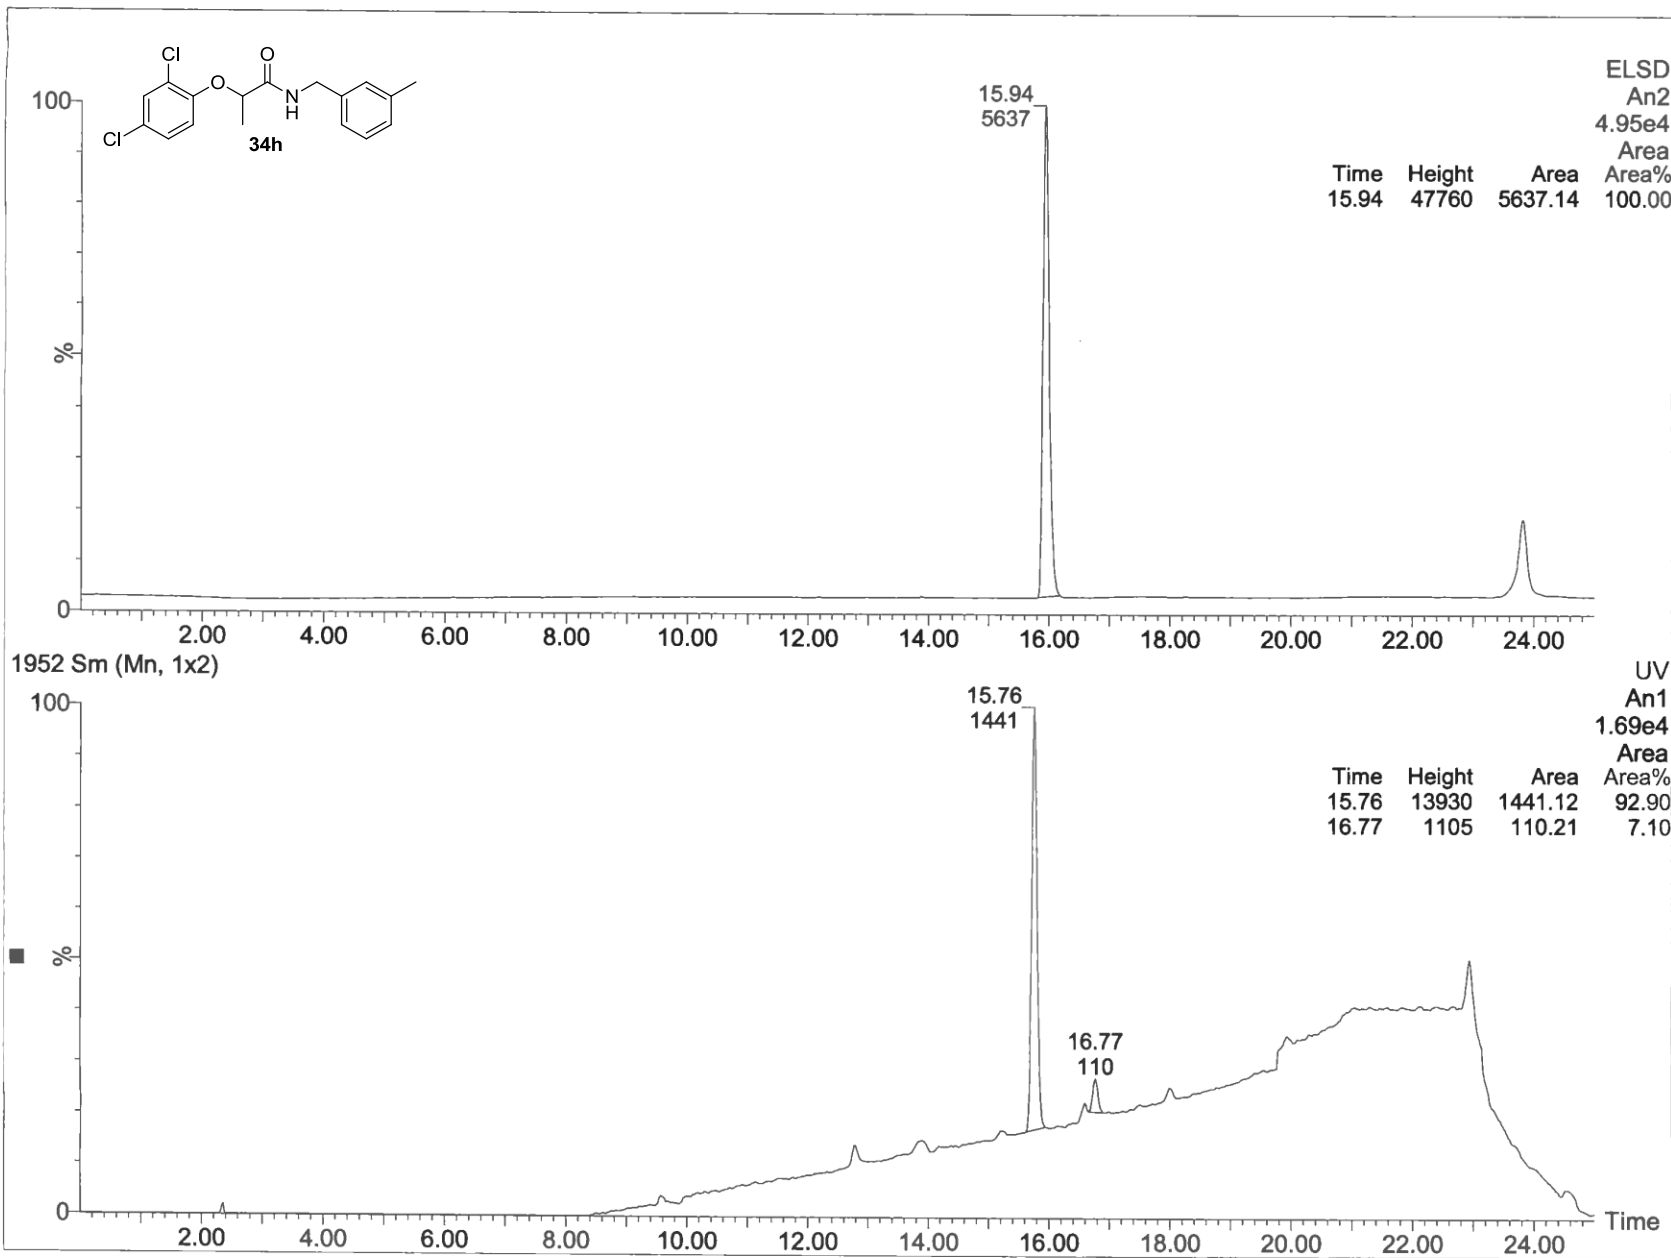

1: Scan ES+  
2.19e7

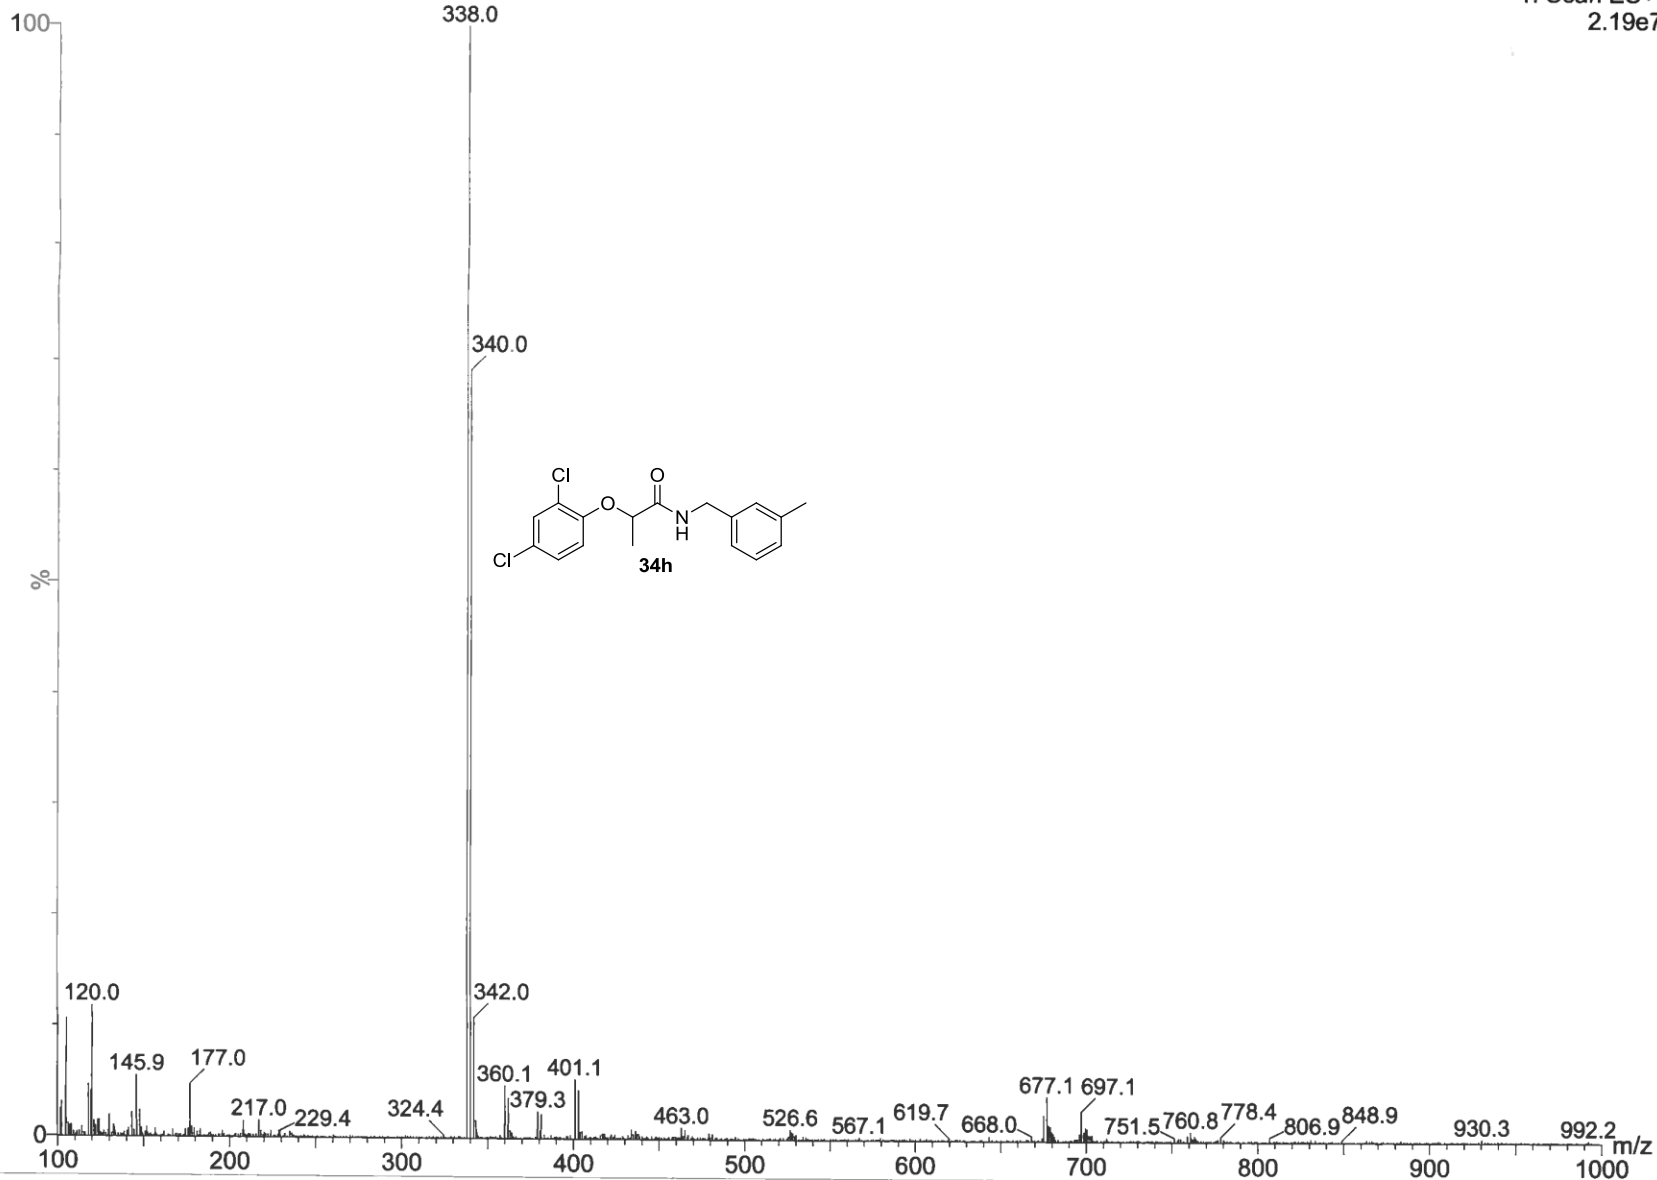



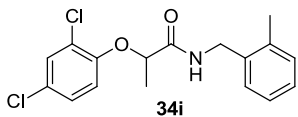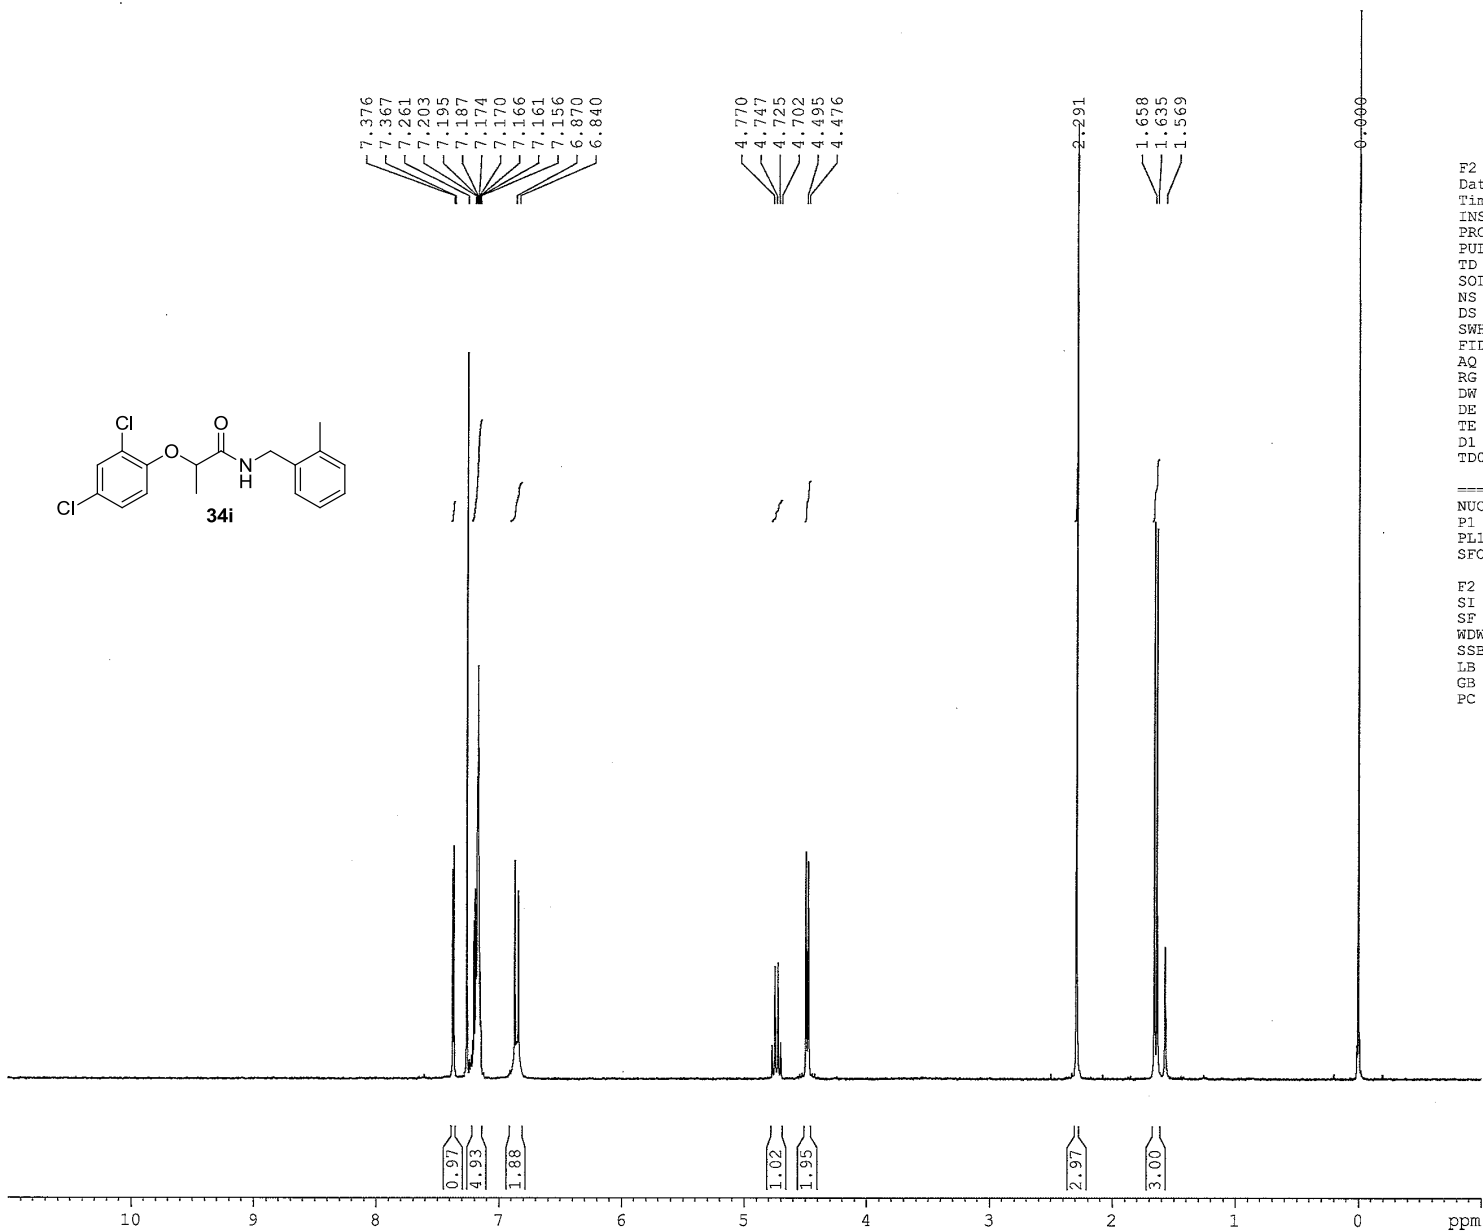

F2 - Acquisition Parameters  
 Date 20100422  
 Time 14.16  
 INSTRUM spect  
 PROBHD 5 mm BBO BB-1H  
 PULPROG zg30  
 TD 65536  
 SOLVENT CDCl3  
 NS 16  
 DS 2  
 SWH 6172.839 Hz  
 FIDRES 0.094190 Hz  
 AQ 5.3084660 sec  
 RG 2048  
 DW 81.000 usec  
 DE 6.50 usec  
 TE 295.9 K  
 DL 1.00000000 sec  
 TDO 1

===== CHANNEL f1 =====  
 NUC1 1H  
 P1 10.00 usec  
 PL1 9.20 dB  
 SFO1 299.5718500 MHz

F2 - Processing parameters  
 SI 32768  
 SF 299.5700030 MHz  
 WDW EM  
 SSB 0  
 LB 0.30 Hz  
 GB 0  
 PC 1.00

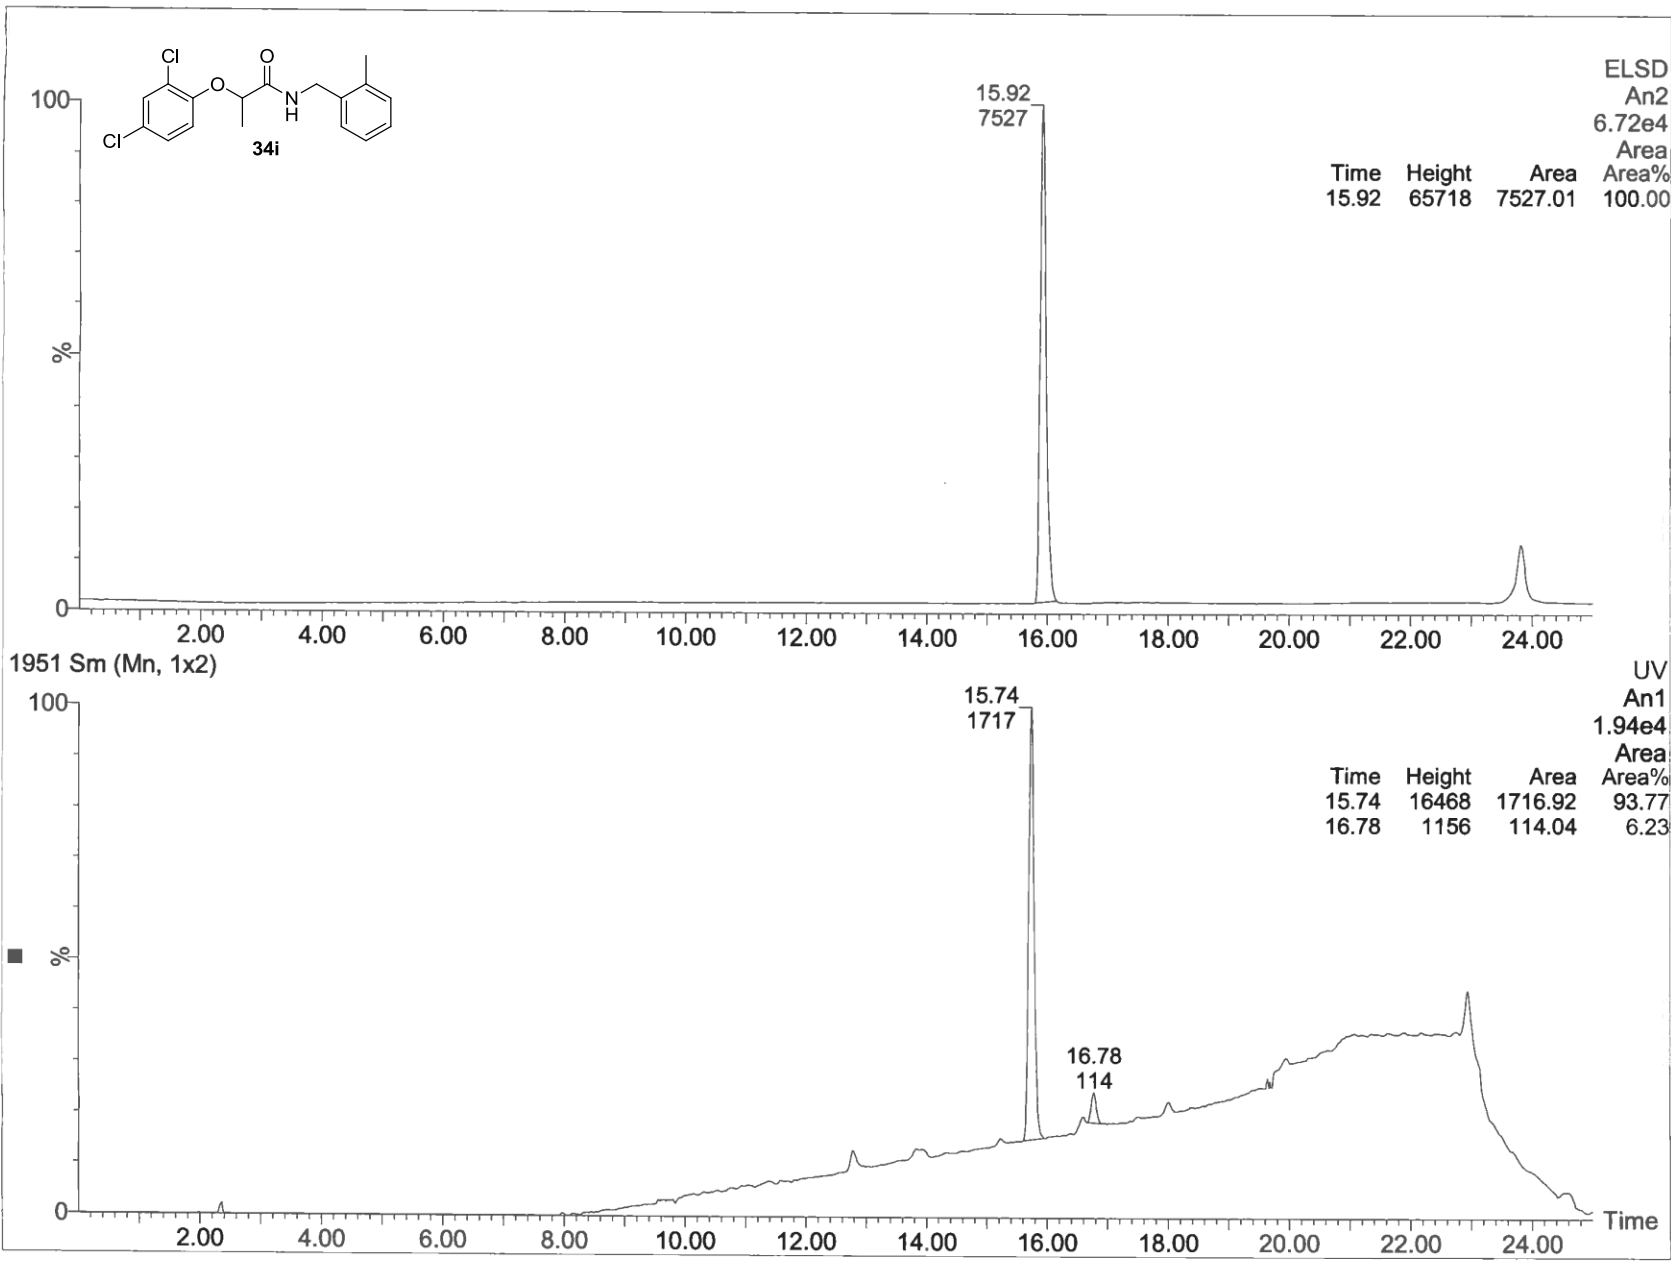

1: Scan ES+  
2.97e7

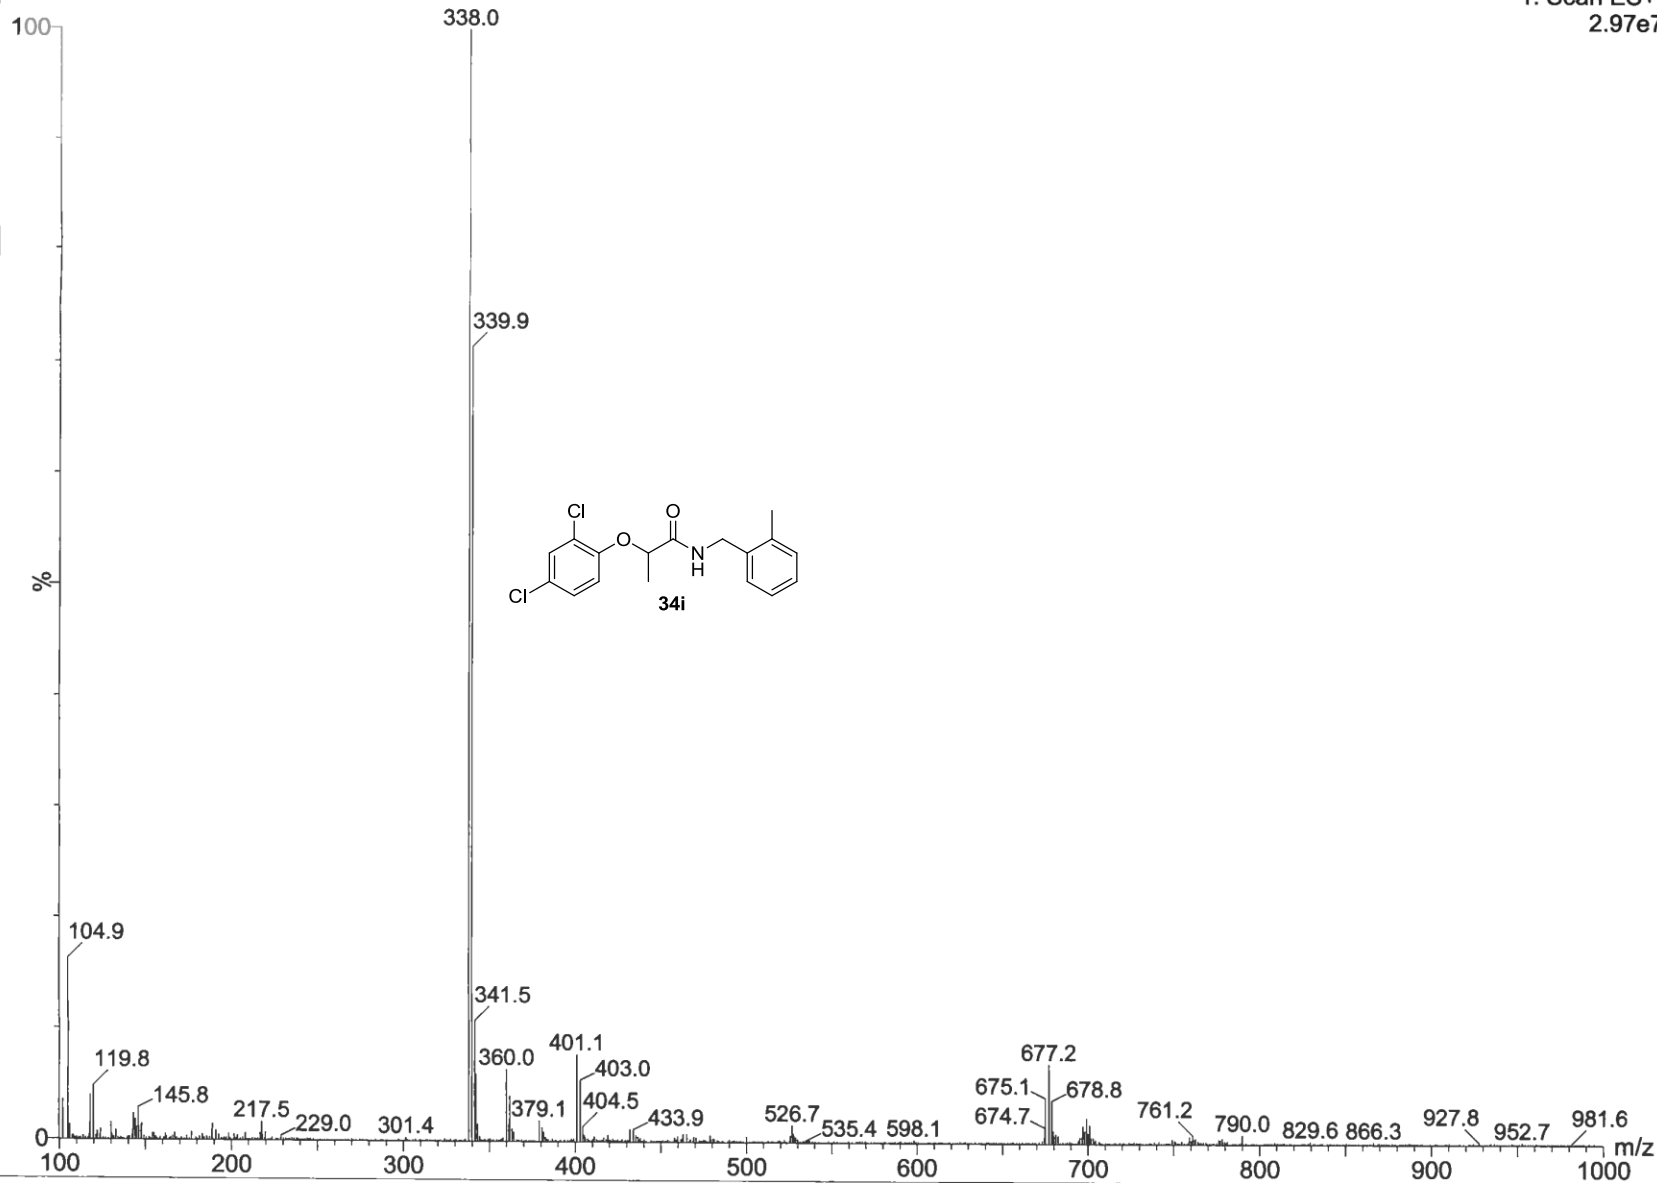

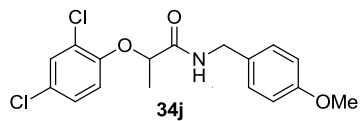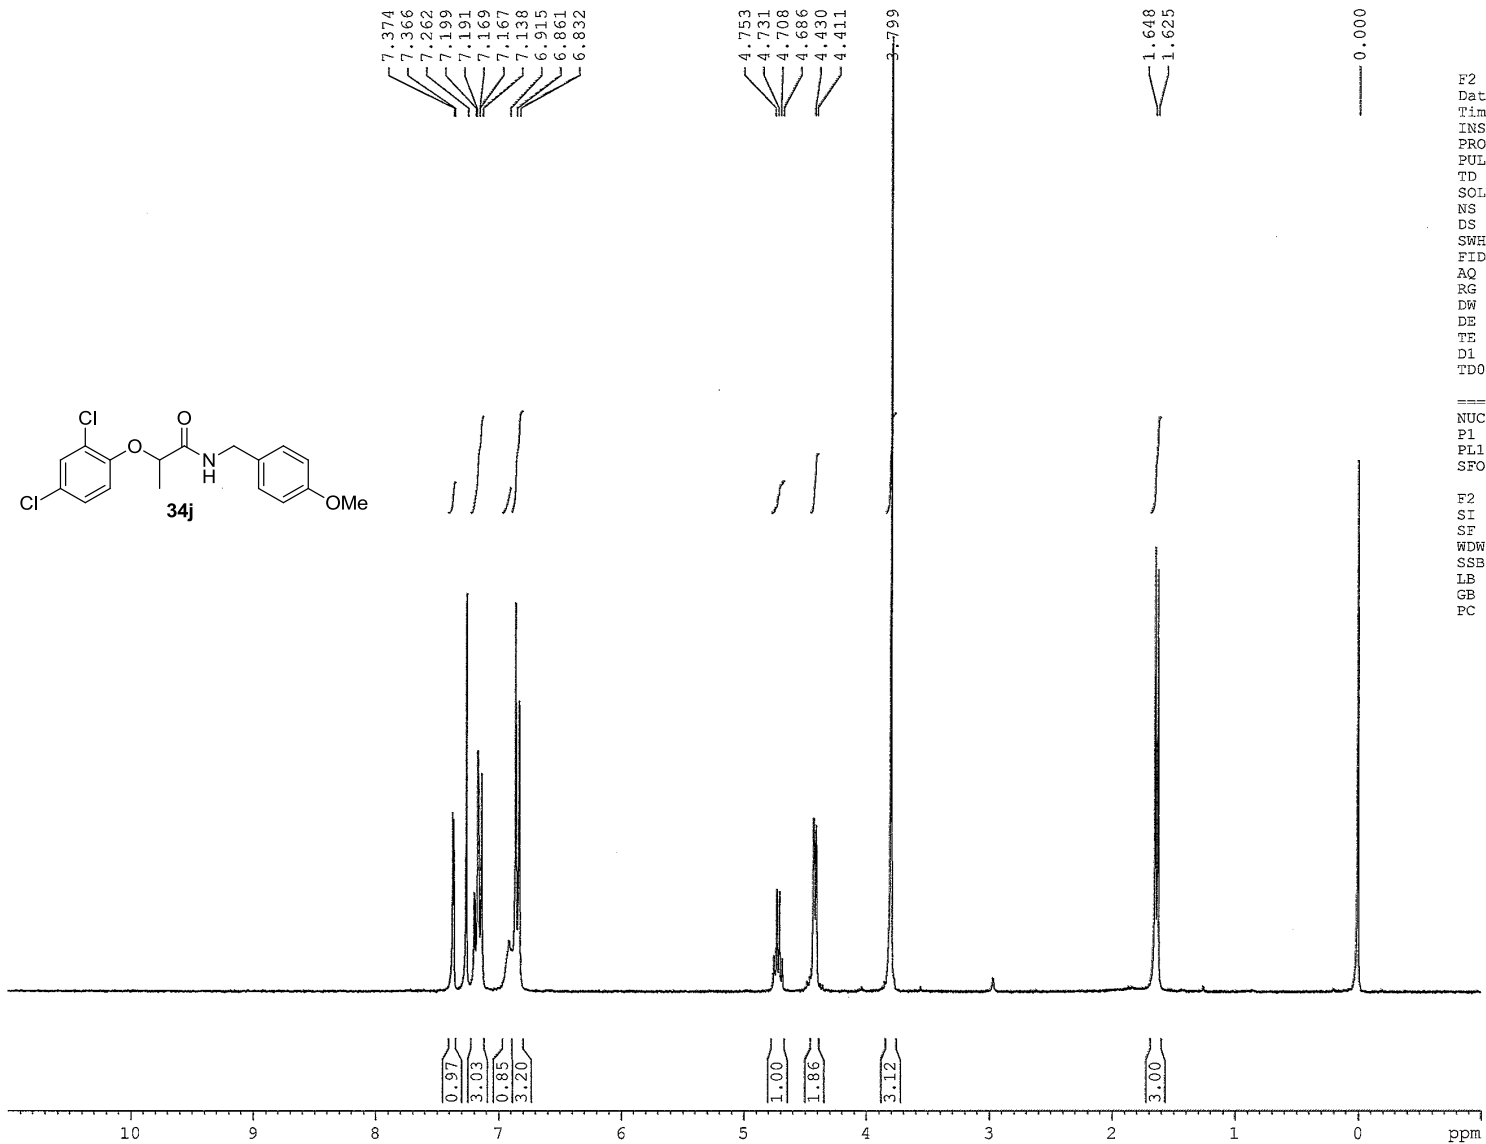

F2 - Acquisition Parameters  
 Date\_ 20100415  
 Time 11.38  
 INSTRUM spect  
 PROBHD 5 mm BBO BB-1H  
 PULPROG zg30  
 TD 65536  
 SOLVENT CDCl3  
 NS 16  
 DS 2  
 SWH 6172.839 Hz  
 FIDRES 0.094190 Hz  
 AQ 5.3084660 sec  
 RG 1290.2  
 DW 81.000 usec  
 DE 6.50 usec  
 TE 294.3 K  
 D1 1.00000000 sec  
 T0 1

===== CHANNEL f1 =====  
 NUC1 1H  
 P1 10.00 usec  
 PL1 9.20 dB  
 SFO1 299.5718500 MHz

F2 - Processing parameters  
 SI 32768  
 SF 299.5700020 MHz  
 WDW EM  
 SSB 0  
 LB 0.30 Hz  
 GB 0  
 PC 1.00

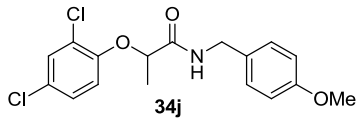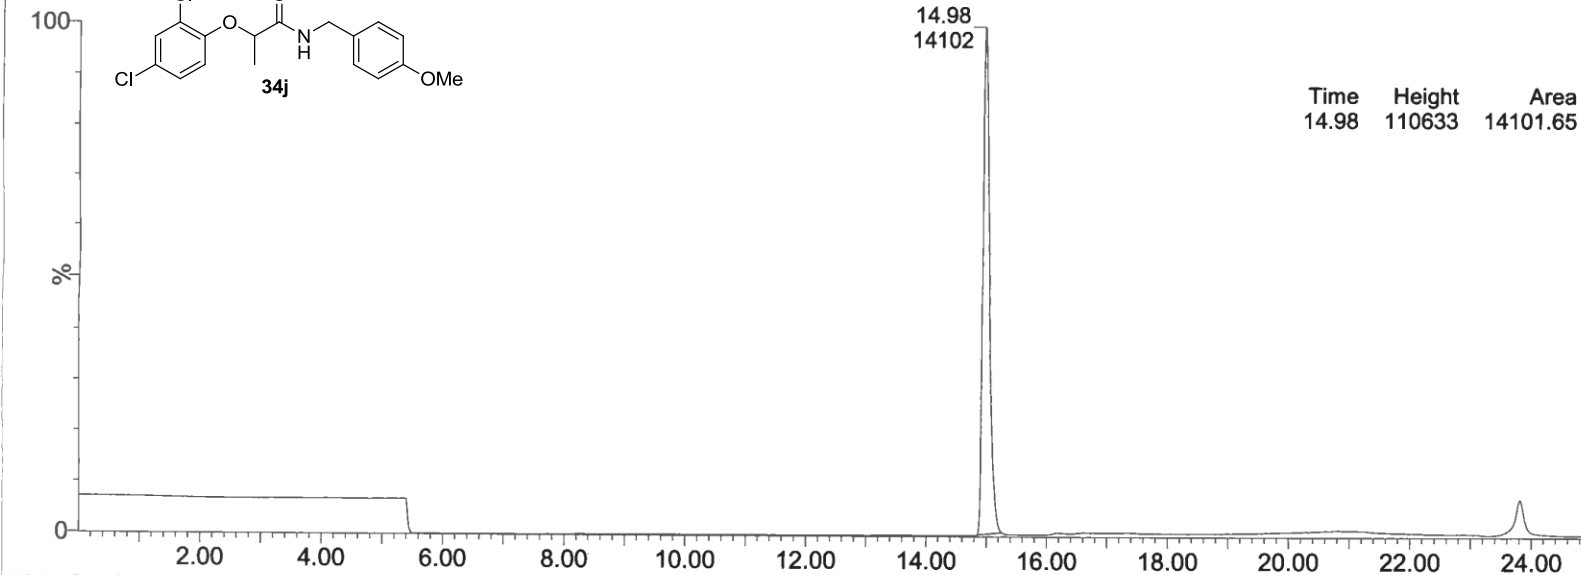

ELSD  
An2  
1.11e5  
Area  
Area%

| Time  | Height | Area     | Area%  |
|-------|--------|----------|--------|
| 14.98 | 110633 | 14101.65 | 100.00 |

1940 Sm (Mn, 1x2)

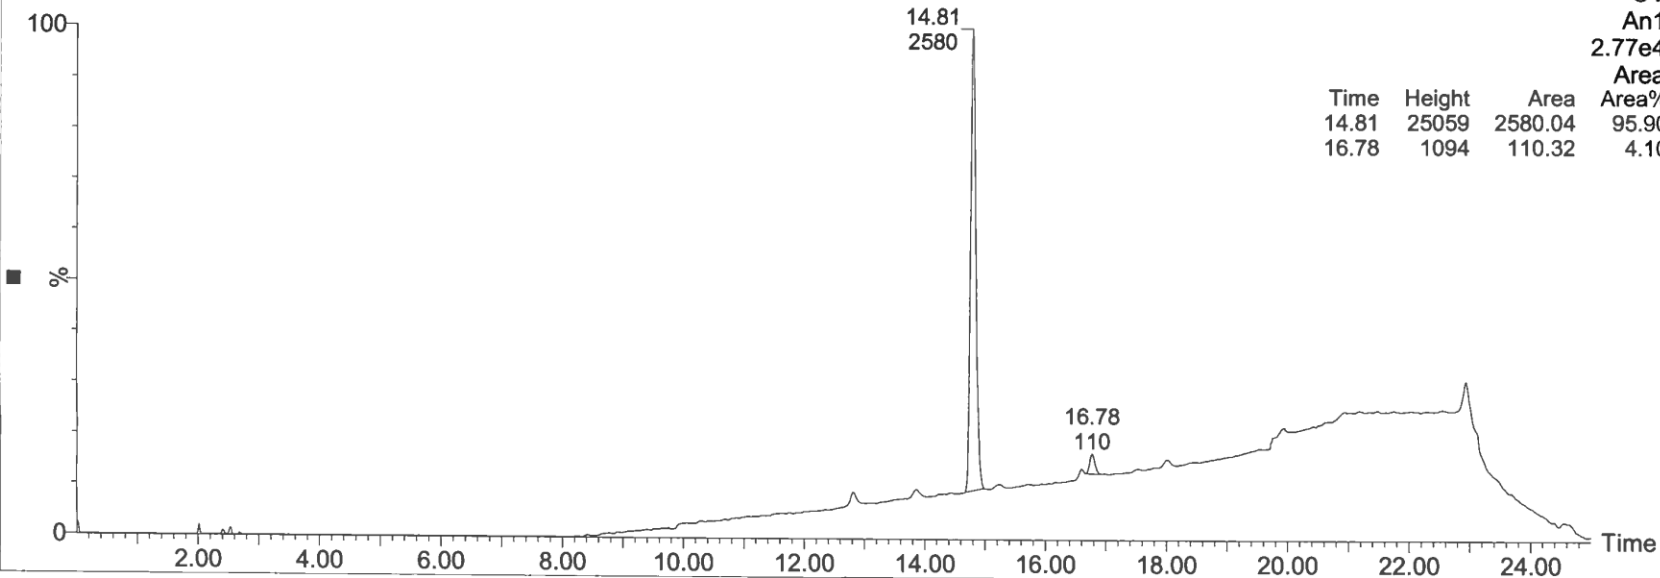

UV  
An1  
2.77e4  
Area  
Area%

| Time  | Height | Area    | Area% |
|-------|--------|---------|-------|
| 14.81 | 25059  | 2580.04 | 95.90 |
| 16.78 | 1094   | 110.32  | 4.10  |

1: Scan ES+  
8.62e7

100 120.8

%

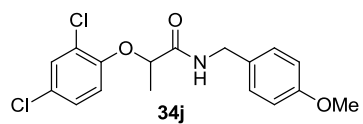

122.0 131.8 188.8 217.7 261.0 316.5 354.0 355.9 376.1 378.0 379.3 417.0 418.9 421.0 478.9 497.3 551.0 560.3 670.8 686.9 709.1 707.1 710.9 729.1 732.8 734.1 795.0 811.8 841.6 913.5 925.4 m/z

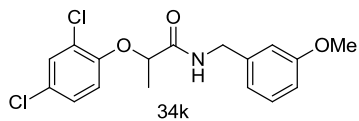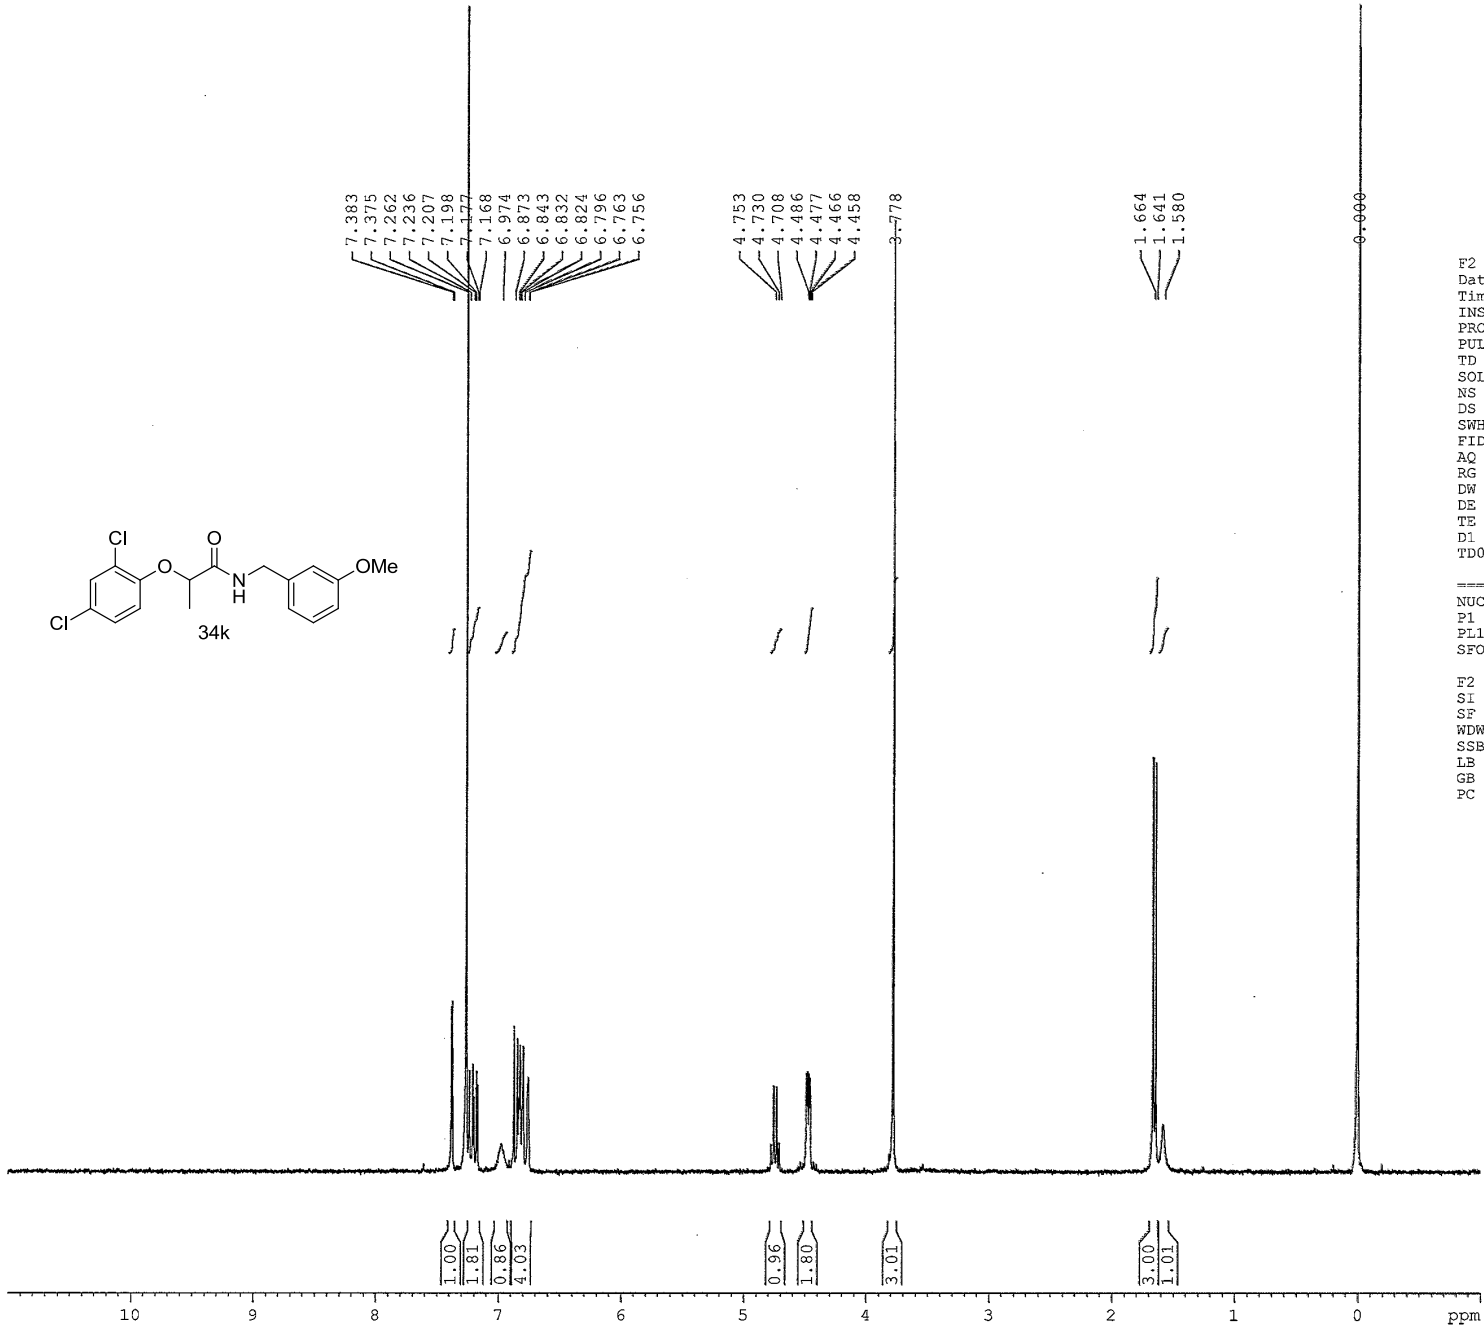

7.383  
7.375  
7.262  
7.236  
7.207  
7.198  
7.177  
7.168  
6.974  
6.873  
6.843  
6.832  
6.824  
6.796  
6.763  
6.756

4.753  
4.730  
4.708  
4.486  
4.477  
4.466  
4.458

3.778

1.664  
1.641  
1.580

0.000

F2 - Acquisition Parameters  
 Date\_ 20100415  
 Time\_ 11.47  
 INSTRUM spect  
 PROBHD 5 mm BBO BB-1H  
 PULPROG zg30  
 TD 65536  
 SOLVENT CDCl3  
 NS 16  
 DS 2  
 SWH 6172.839 Hz  
 FIDRES 0.094190 Hz  
 AQ 5.3084660 sec  
 RG 2298.8  
 DW 81.000 usec  
 DE 6.50 usec  
 TE 294.4 K  
 D1 1.00000000 sec  
 TD0 1

===== CHANNEL f1 =====  
 NUC1 1H  
 P1 10.00 usec  
 PL1 9.20 dB  
 SFO1 299.5718500 MHz

F2 - Processing parameters  
 SI 32768  
 SF 299.5700024 MHz  
 WDW EM  
 SSB 0  
 LB 0.30 Hz  
 GB 0  
 PC 1.00

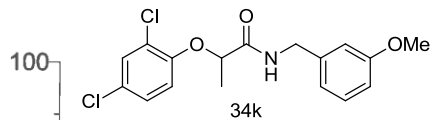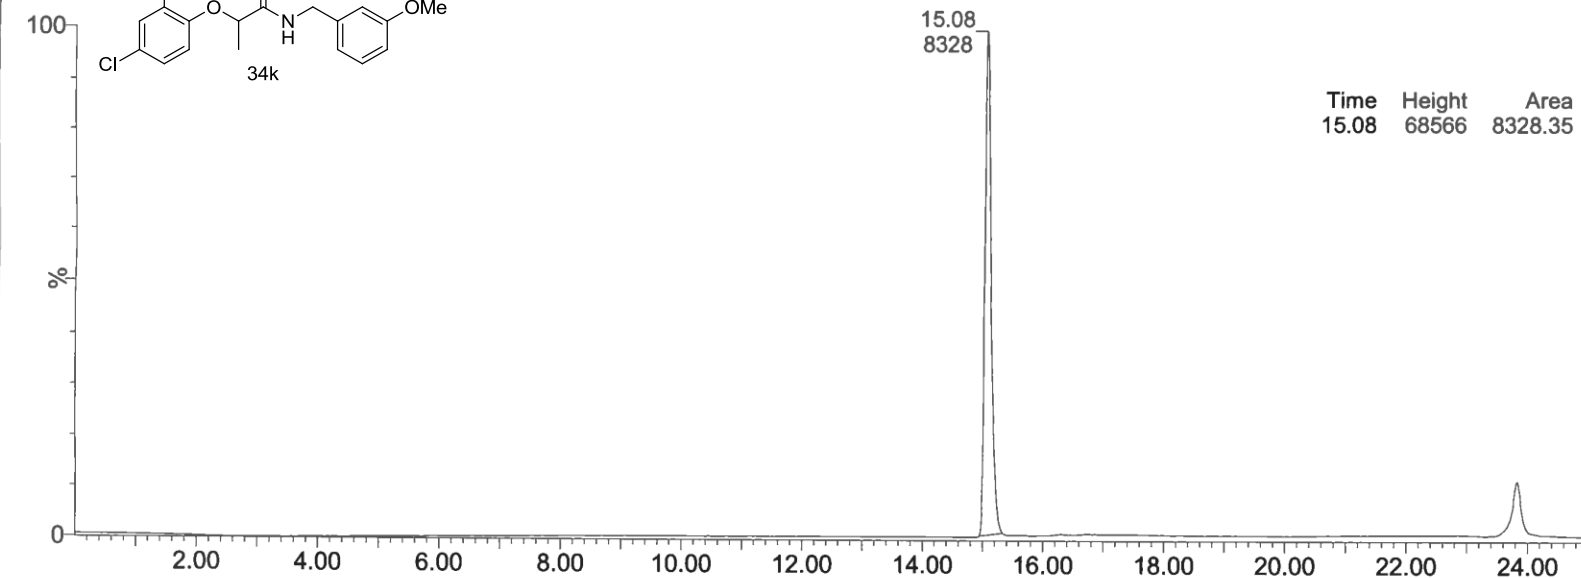

ELSD  
An2  
6.93e4  
Area  
Area%

| Time  | Height | Area    | Area%  |
|-------|--------|---------|--------|
| 15.08 | 68566  | 8328.35 | 100.00 |

1941 Sm (Mn, 1x2)

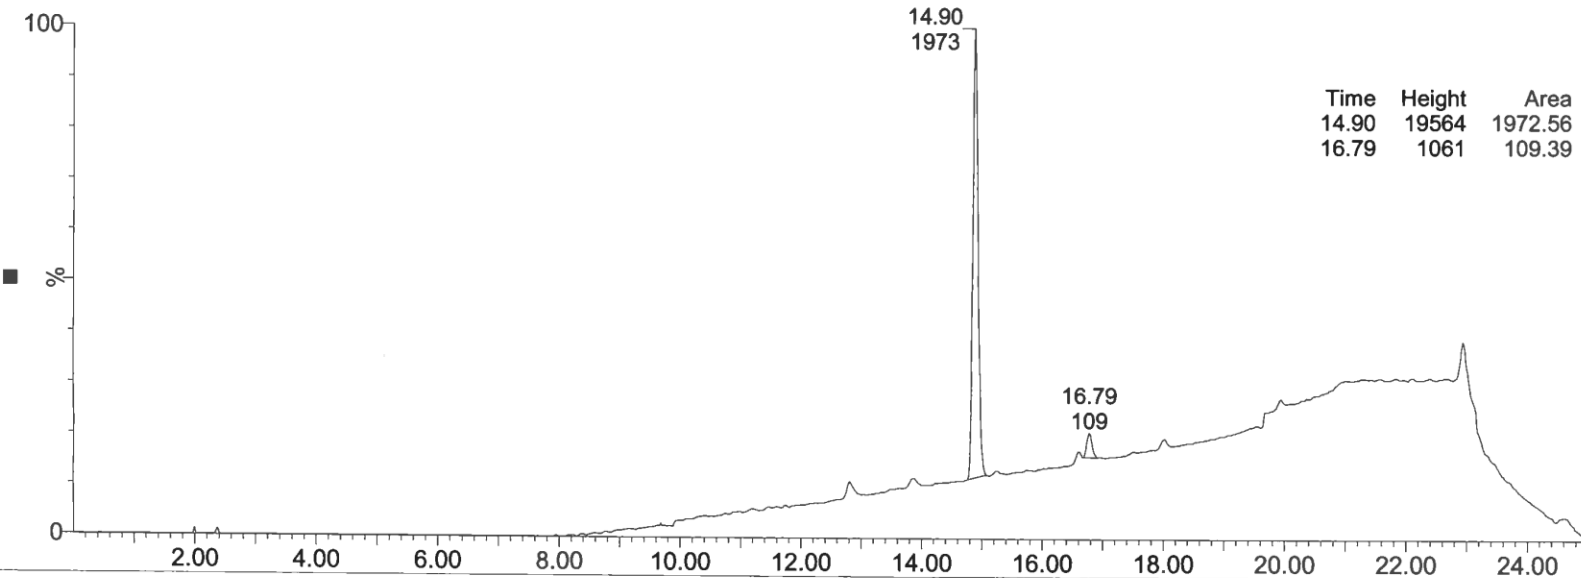

UV  
An1  
2.22e4  
Area  
Area%

| Time  | Height | Area    | Area% |
|-------|--------|---------|-------|
| 14.90 | 19564  | 1972.56 | 94.75 |
| 16.79 | 1061   | 109.39  | 5.25  |



1: Scan ES+  
6.58e7

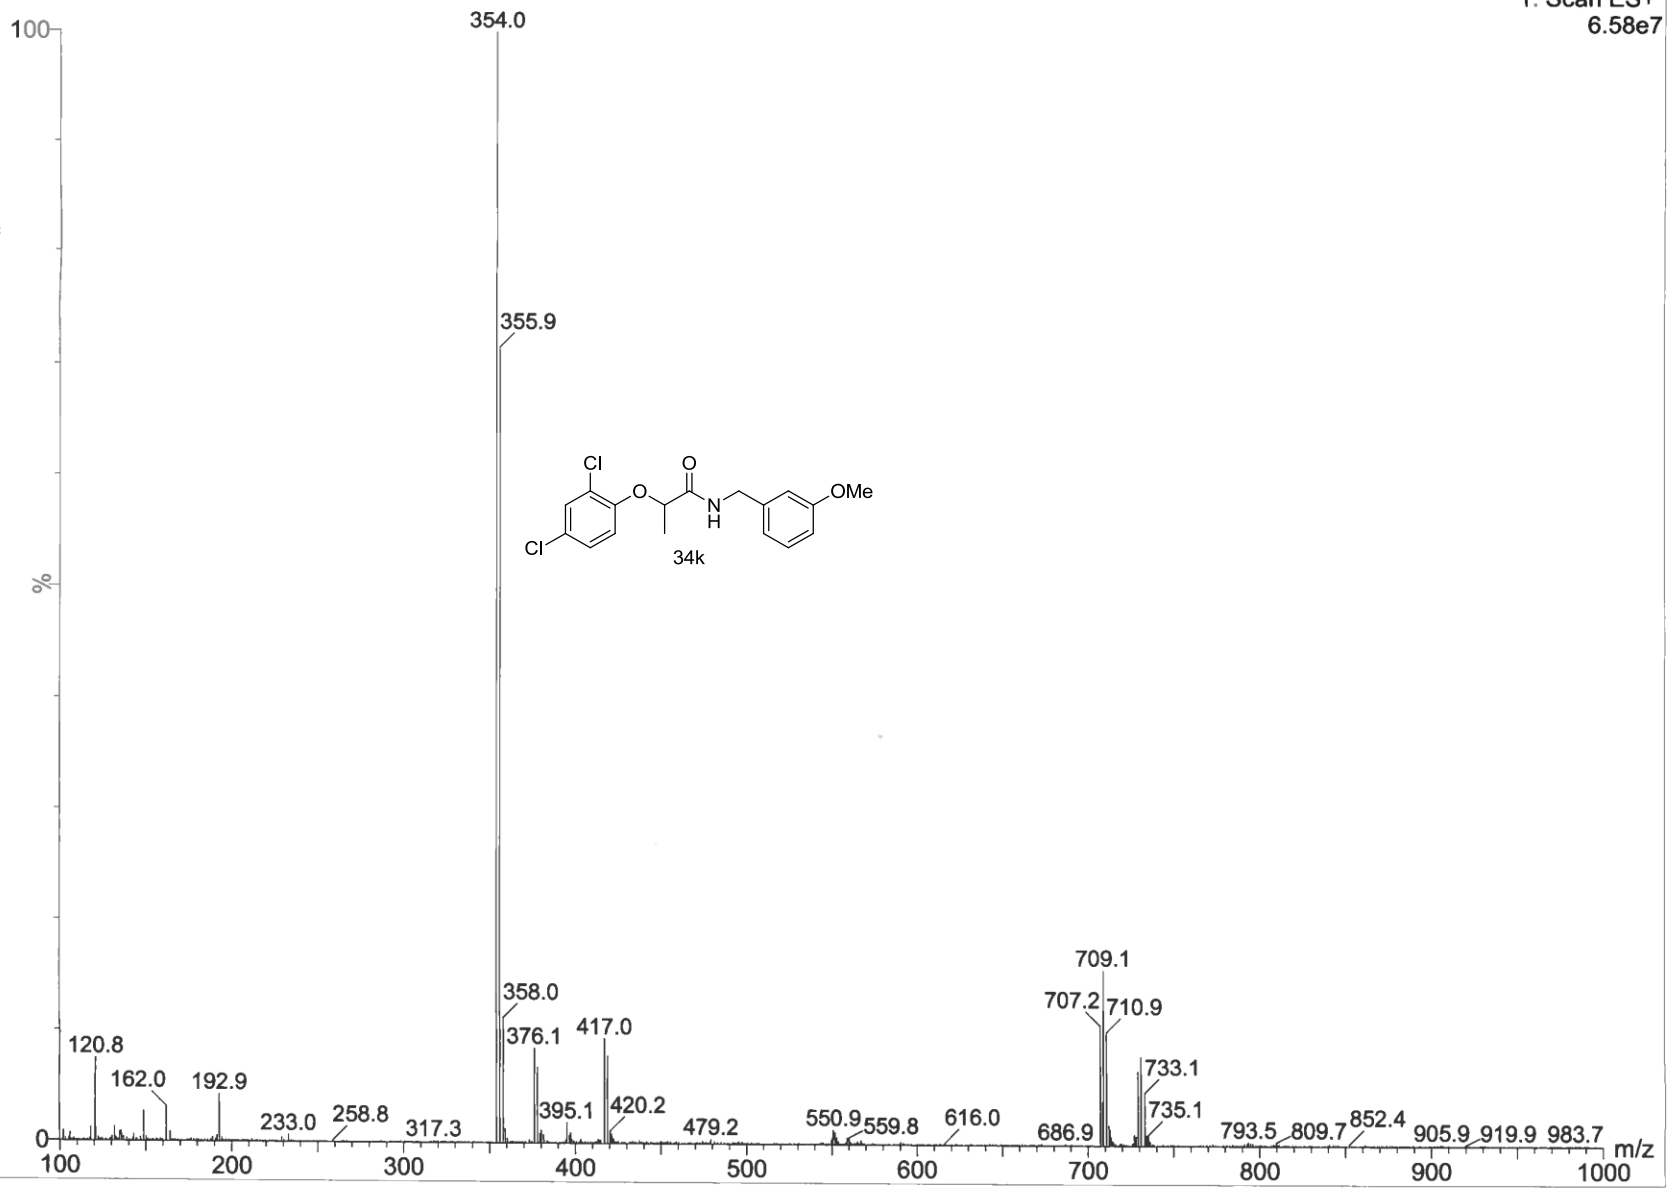

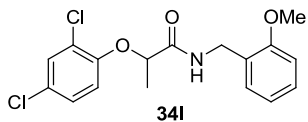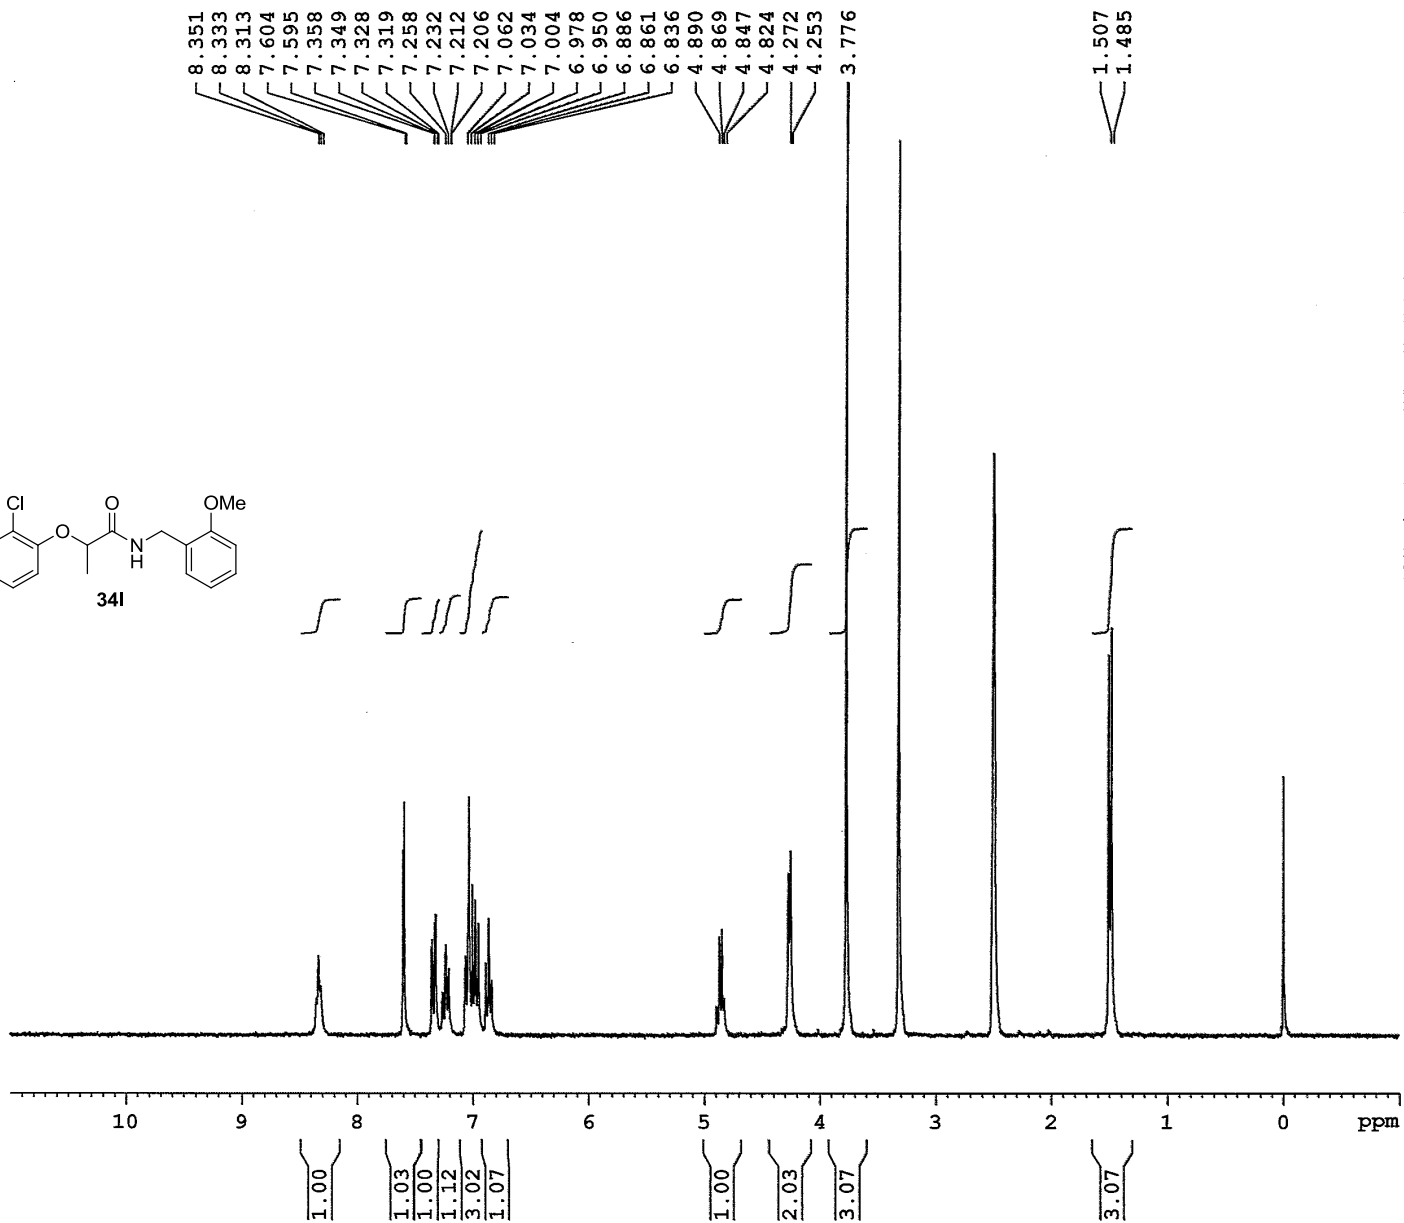

8.351  
8.333  
8.313  
7.604  
7.595  
7.358  
7.349  
7.328  
7.319  
7.258  
7.232  
7.212  
7.206  
7.062  
7.034  
7.004  
6.978  
6.950  
6.886  
6.861  
6.836  
4.890  
4.869  
4.847  
4.824  
4.272  
4.253  
3.776

1.507  
1.485

F2 - Acquisition Parameters  
 Date 20130815  
 Time 15.52  
 INSTRUM spect  
 PROBHD 5 mm BBO BB-1H  
 PULPROG zg30  
 TD 65536  
 SOLVENT DMSO  
 NS 16  
 DS 2  
 SWH 6172.839 Hz  
 FIDRES 0.094190 Hz  
 AQ 5.3084660 sec  
 RG 2298.8  
 DW 81.000 usec  
 DE 6.50 usec  
 TE 298.2 K  
 D1 1.00000000 sec  
 TDO 1

CHANNEL f1  
 NUC1 1H  
 P1 10.00 usec  
 PL1 3.00 dB  
 SFO1 299.4518492 MHz

F2 - Processing parameters  
 SI 32768  
 SF 299.4500036 MHz  
 WDW EM  
 SSB 0  
 LB 0.30 Hz  
 GB 0  
 PC 1.00

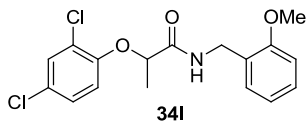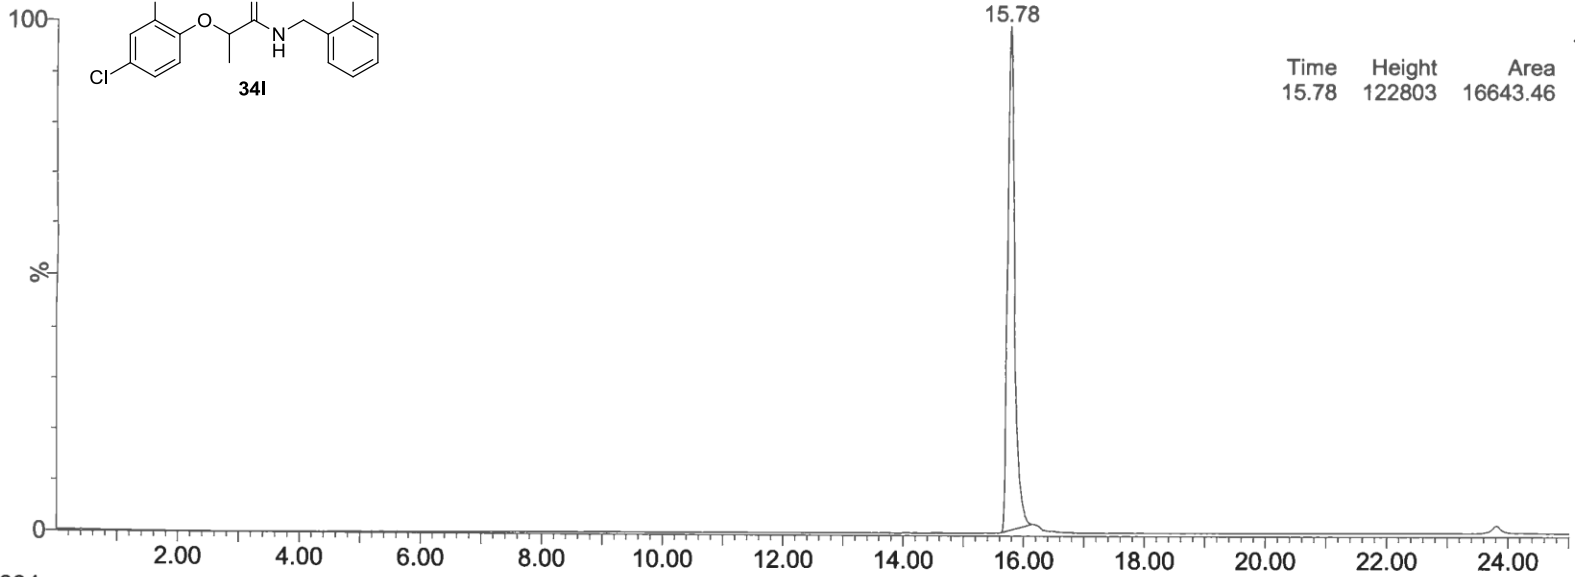

ELSD  
An2  
1.24e5

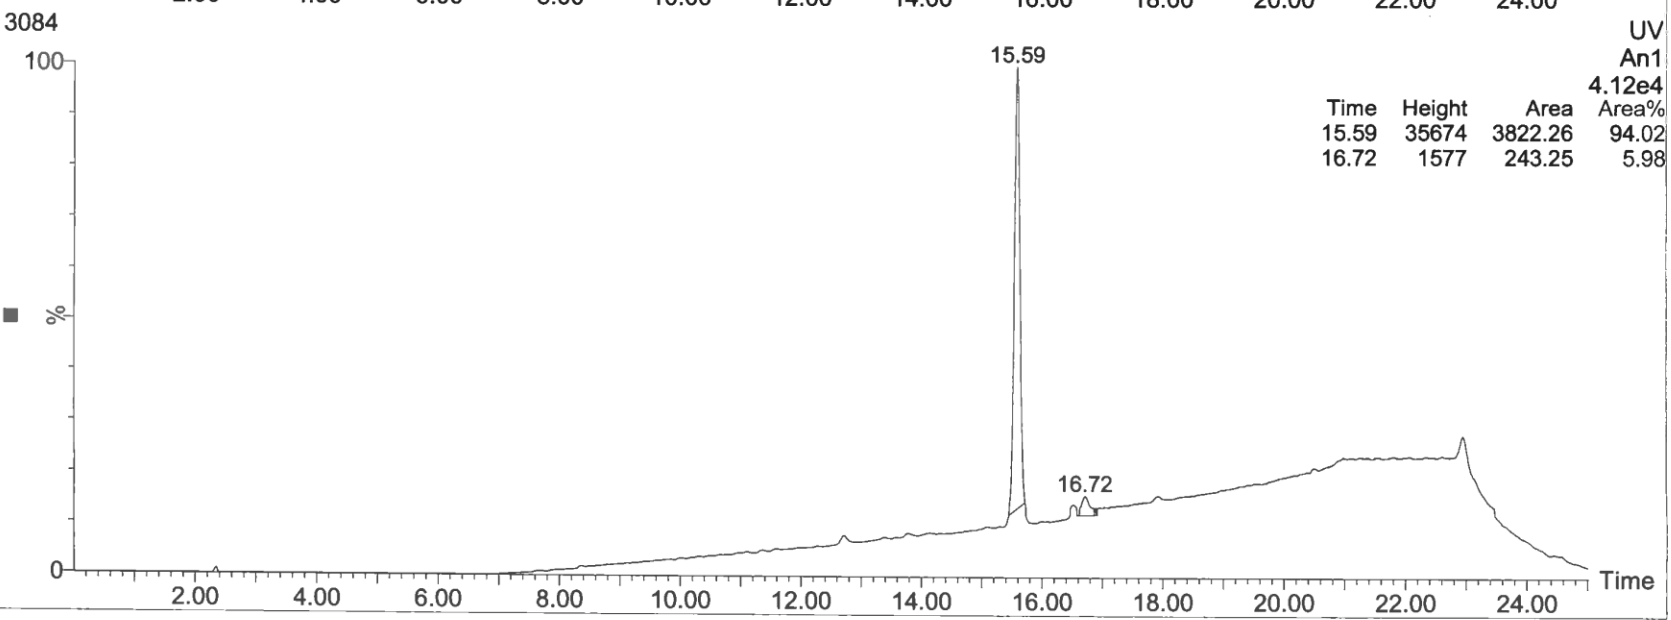

UV  
An1  
4.12e4

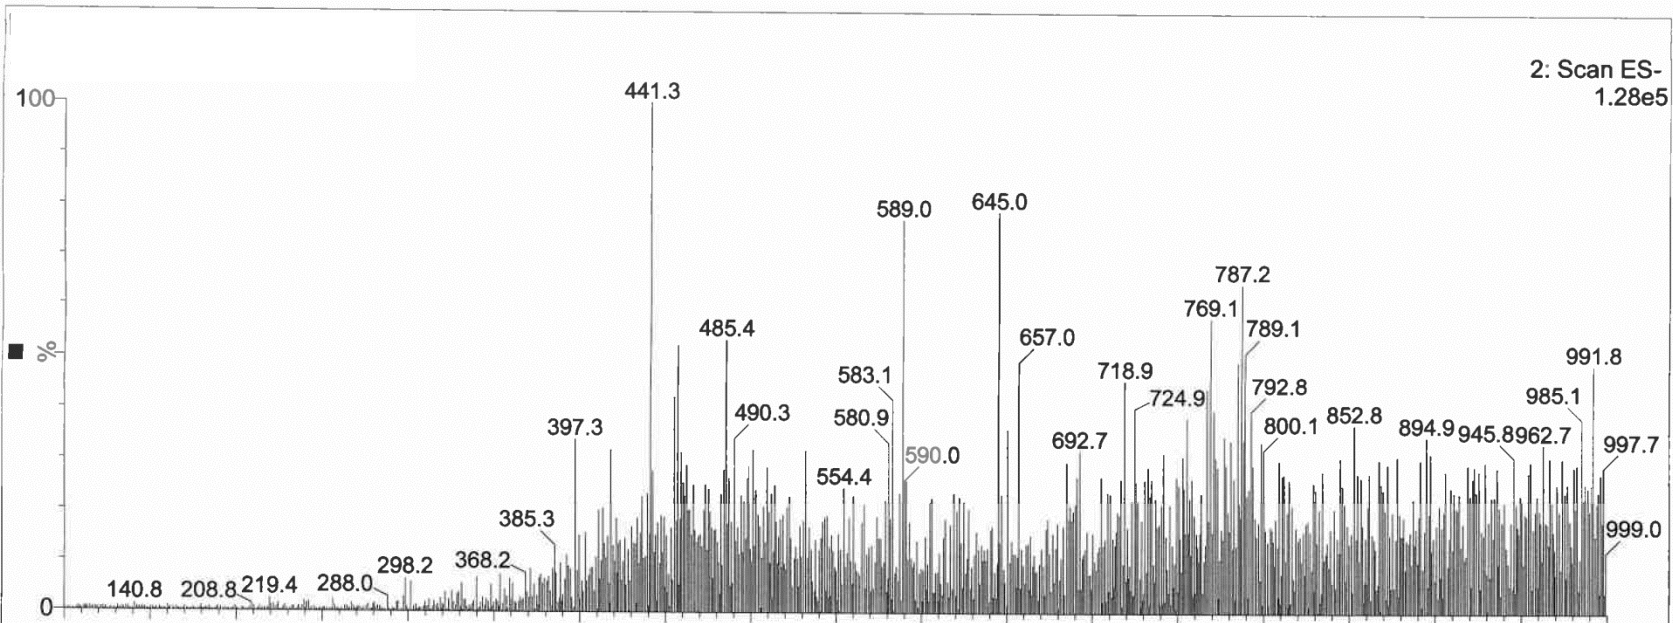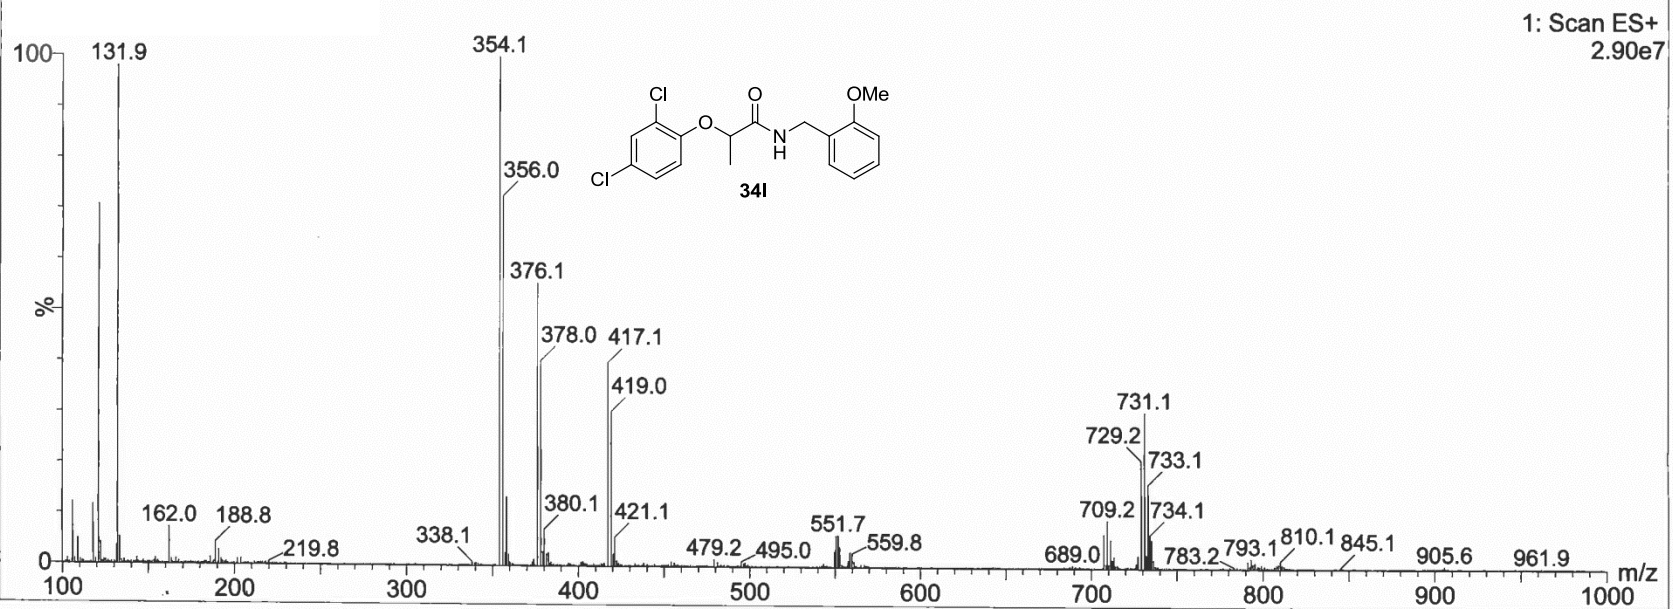

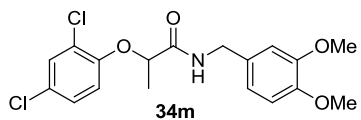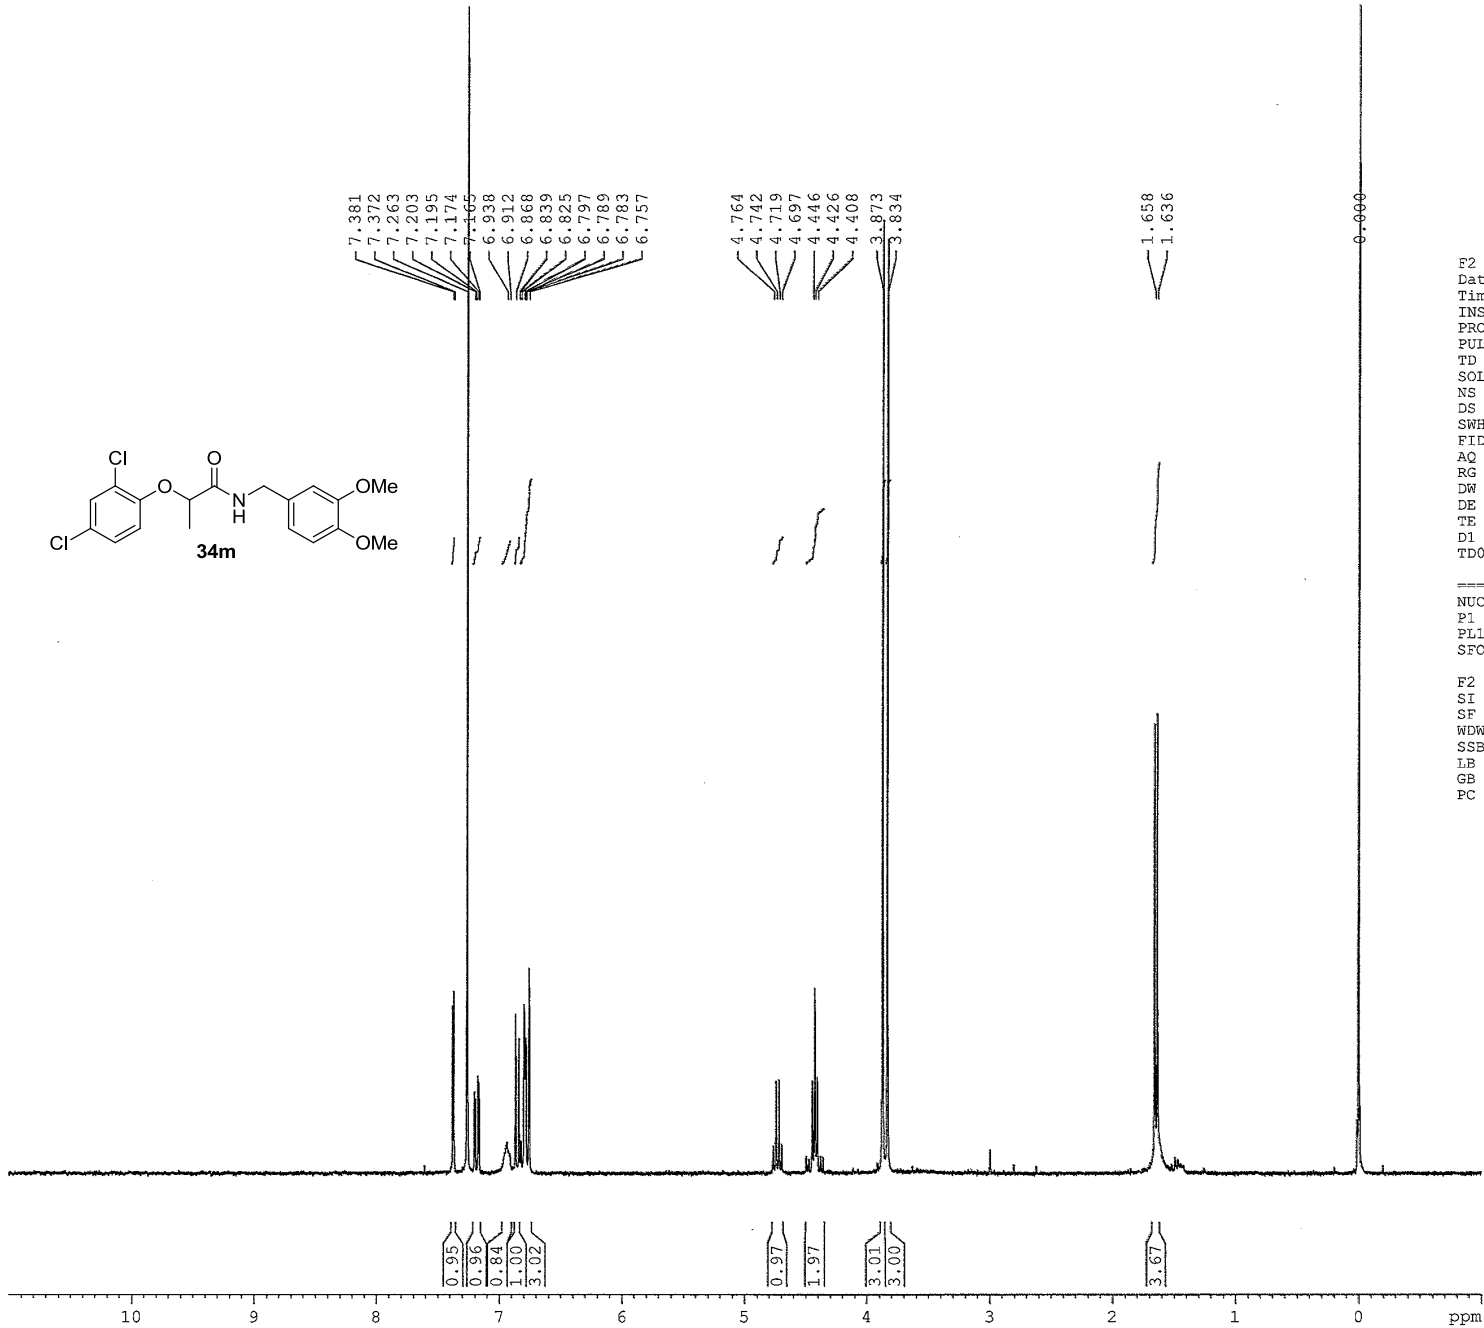

F2 - Acquisition Parameters  
 Date\_ 20100415  
 Time\_ 11.56  
 INSTRUM spect  
 PROBHD 5 mm BBO BB-1H  
 PULPROG zg30  
 TD 65536  
 SOLVENT CDCl3  
 NS 16  
 DS 2  
 SWH 6172.839 Hz  
 FIDRES 0.094190 Hz  
 AQ 5.3084660 sec  
 RG 2298.8  
 DW 81.000 usec  
 DE 6.50 usec  
 TE 294.4 K  
 D1 1.00000000 sec  
 TD0 1

===== CHANNEL f1 =====  
 NUC1 1H  
 P1 10.00 usec  
 PL1 9.20 dB  
 SFO1 299.5718500 MHz

F2 - Processing parameters  
 SI 32768  
 SF 299.5700022 MHz  
 WDW EM  
 SSB 0  
 LB 0.30 Hz  
 GB 0  
 PC 1.00

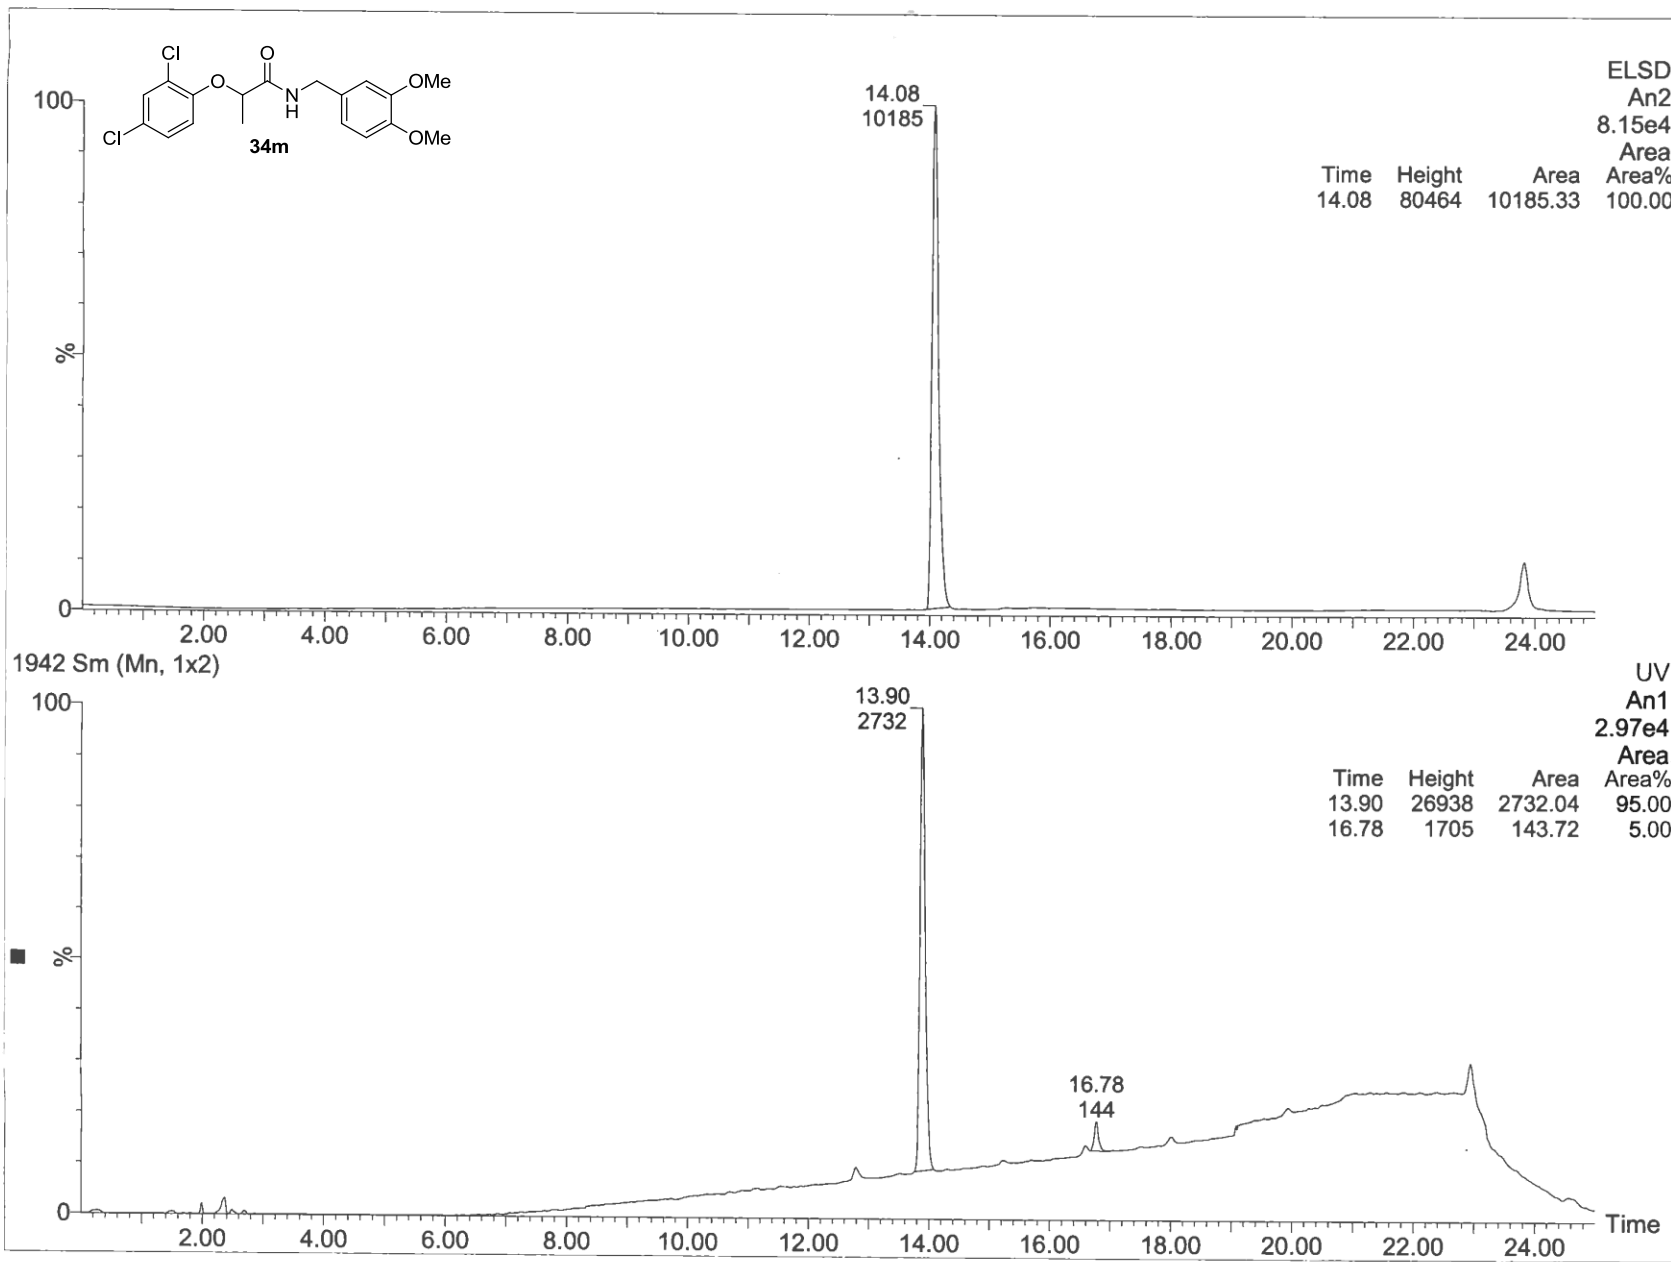

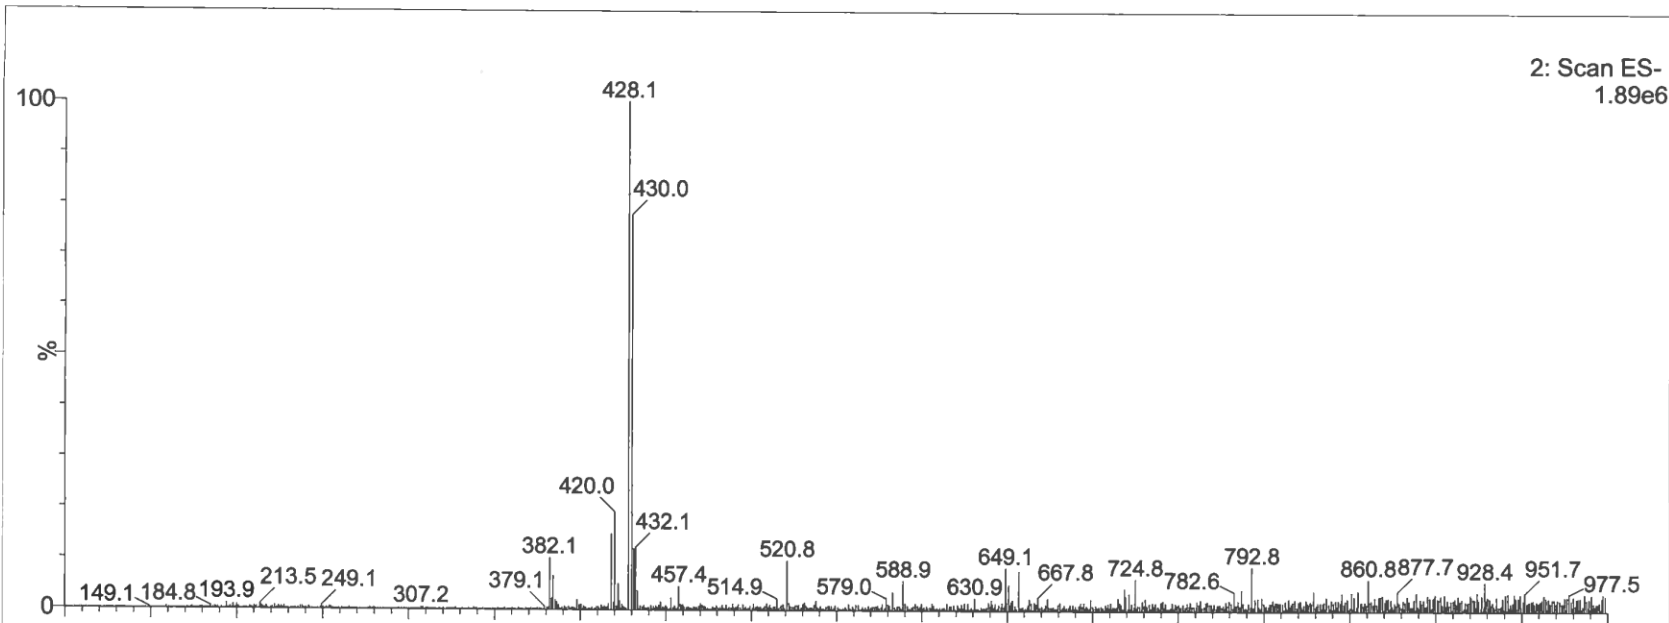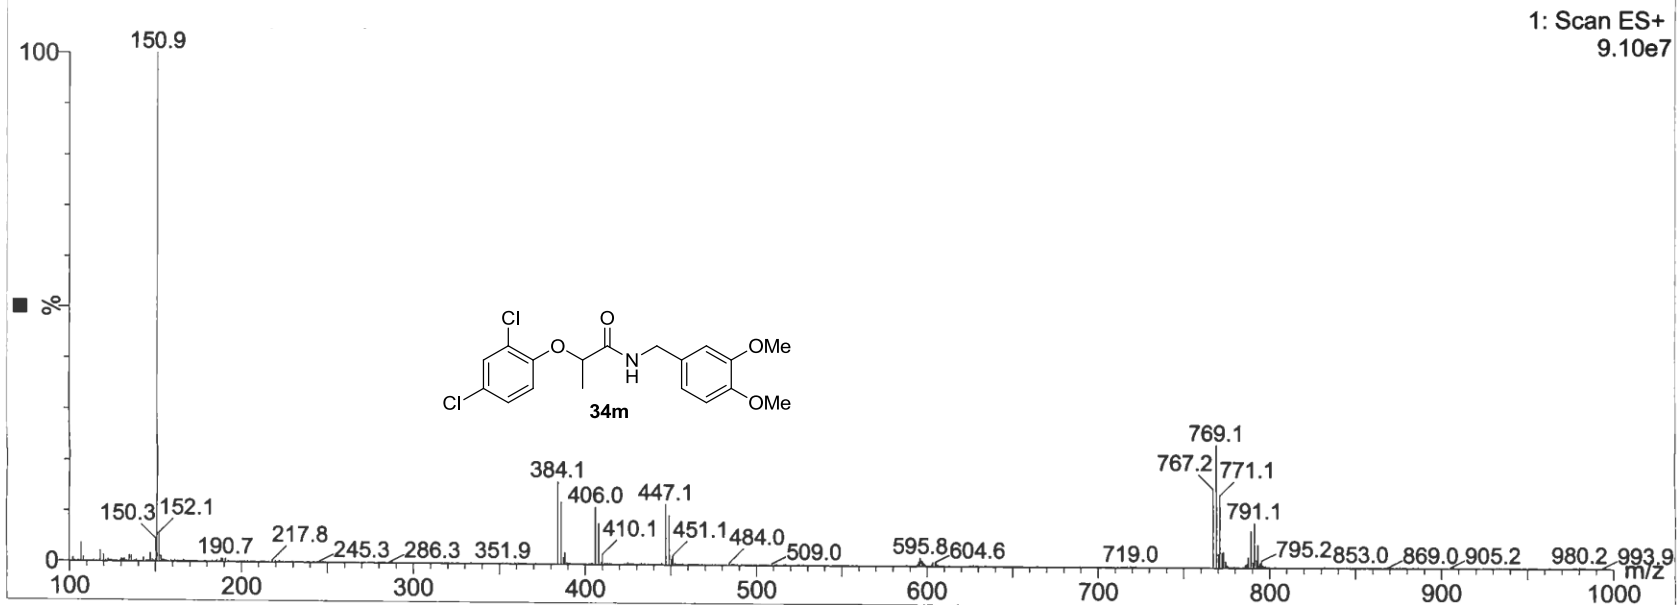

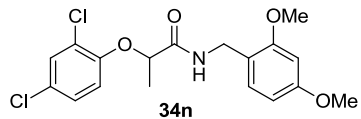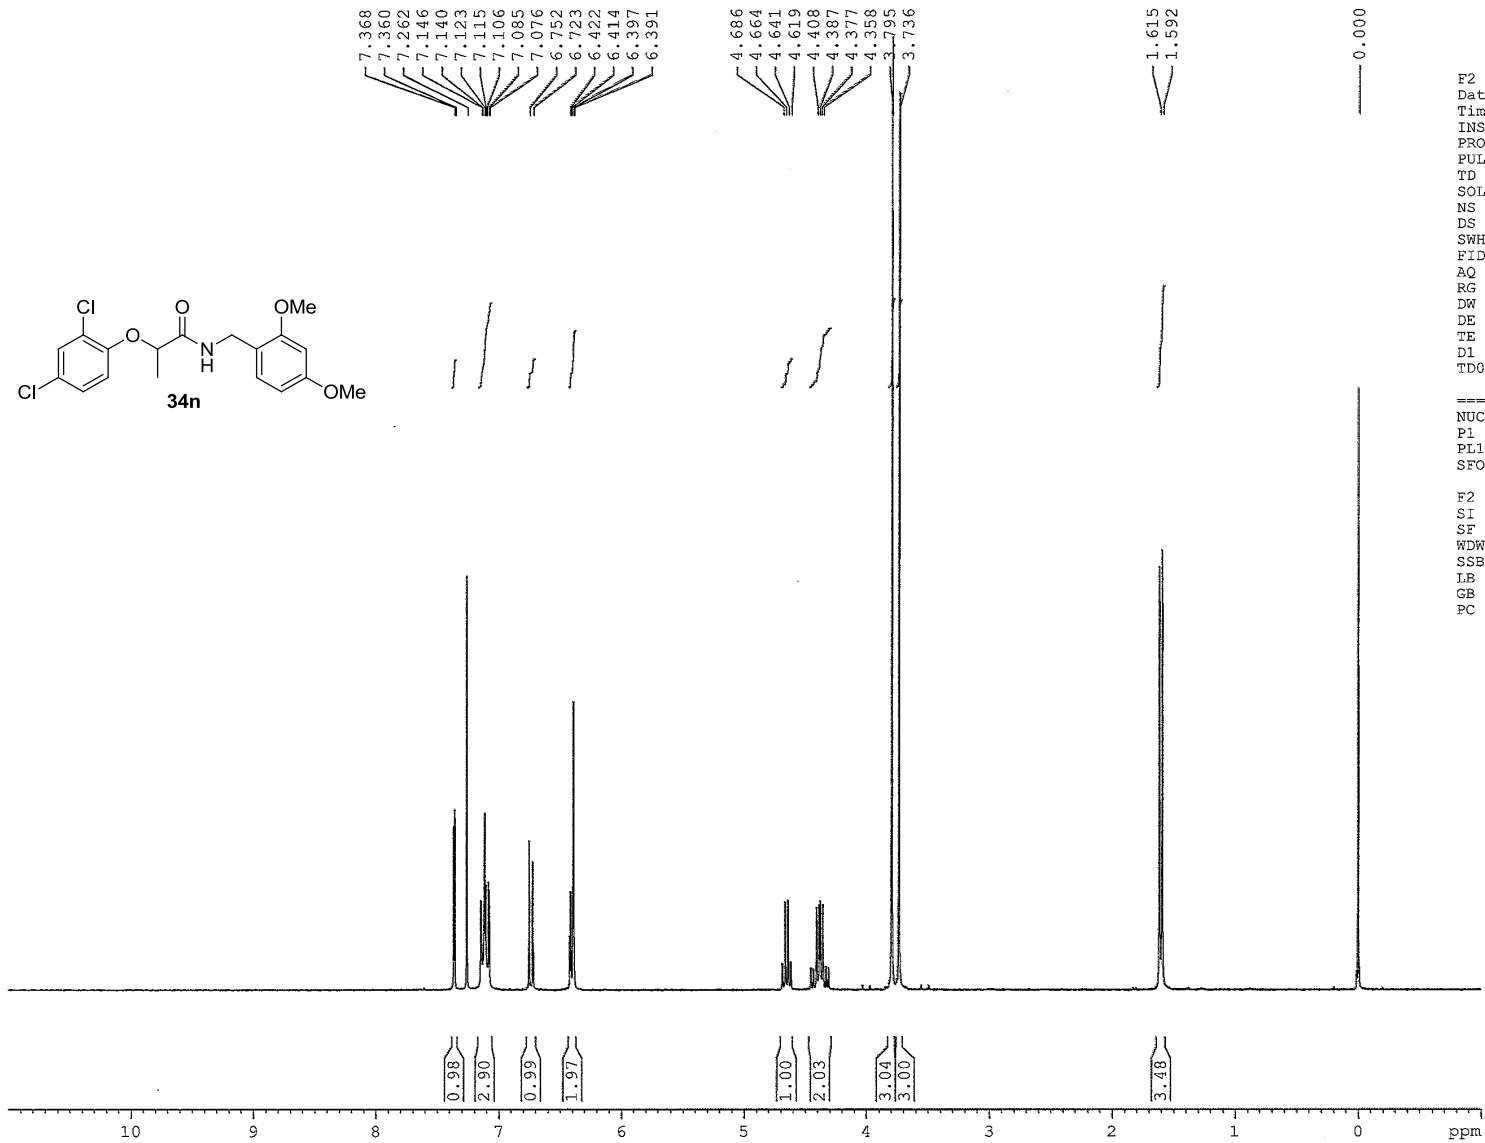

F2 - Acquisition Parameters  
 Date\_ 20100422  
 Time 14.05  
 INSTRUM spect  
 PROBHD 5 mm BBO BB-1H  
 PULPROG zg30  
 TD 65536  
 SOLVENT CDCl3  
 NS 16  
 DS 2  
 SWH 6172.839 Hz  
 FIDRES 0.094190 Hz  
 AQ 5.3084660 sec  
 RG 1625.5  
 DW 81.000 usec  
 DE 6.50 usec  
 TE 295.9 K  
 D1 1.00000000 sec  
 TDO 1

==== CHANNEL f1 =====  
 NUC1 1H  
 P1 10.00 usec  
 PL1 9.20 dB  
 SFO1 299.5718500 MHz

F2 - Processing parameters  
 SI 32768  
 SF 299.5700028 MHz  
 WDW EM  
 SSB 0  
 LB 0.30 Hz  
 GB 0  
 PC 1.00



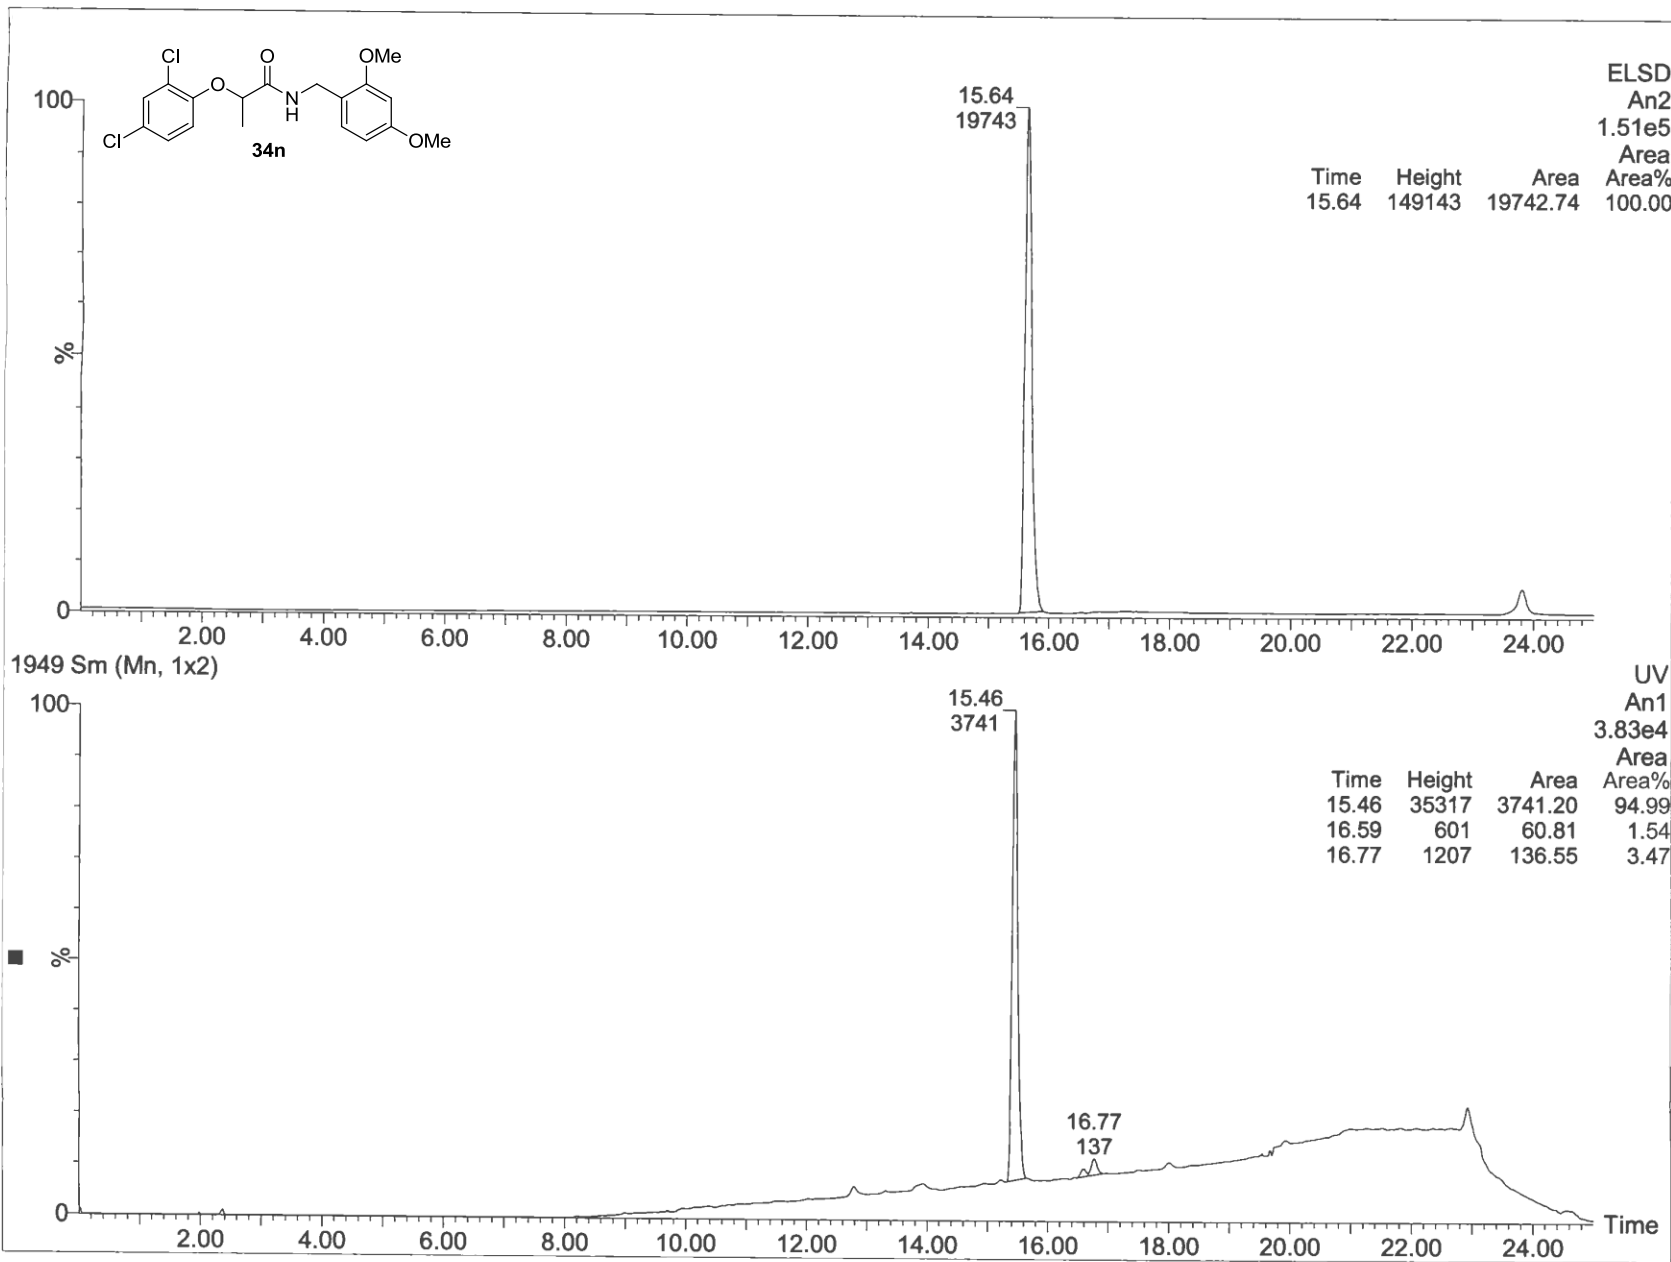

1: Scan ES+  
3.11e7

100  
150.8

%

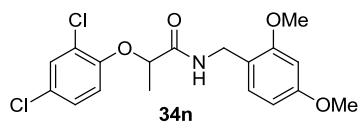

120.8 152.1 207.8 228.8 284.1 342.2 370.6 384.0 406.0 408.0 410.0 447.1 449.0 450.9 461.0 511.1 529.0 596.0 604.2 697.6 718.6 768.9 779.1 789.1 791.1 793.1 794.3 853.1 887.2 898.9 980.2 989.7 m/z

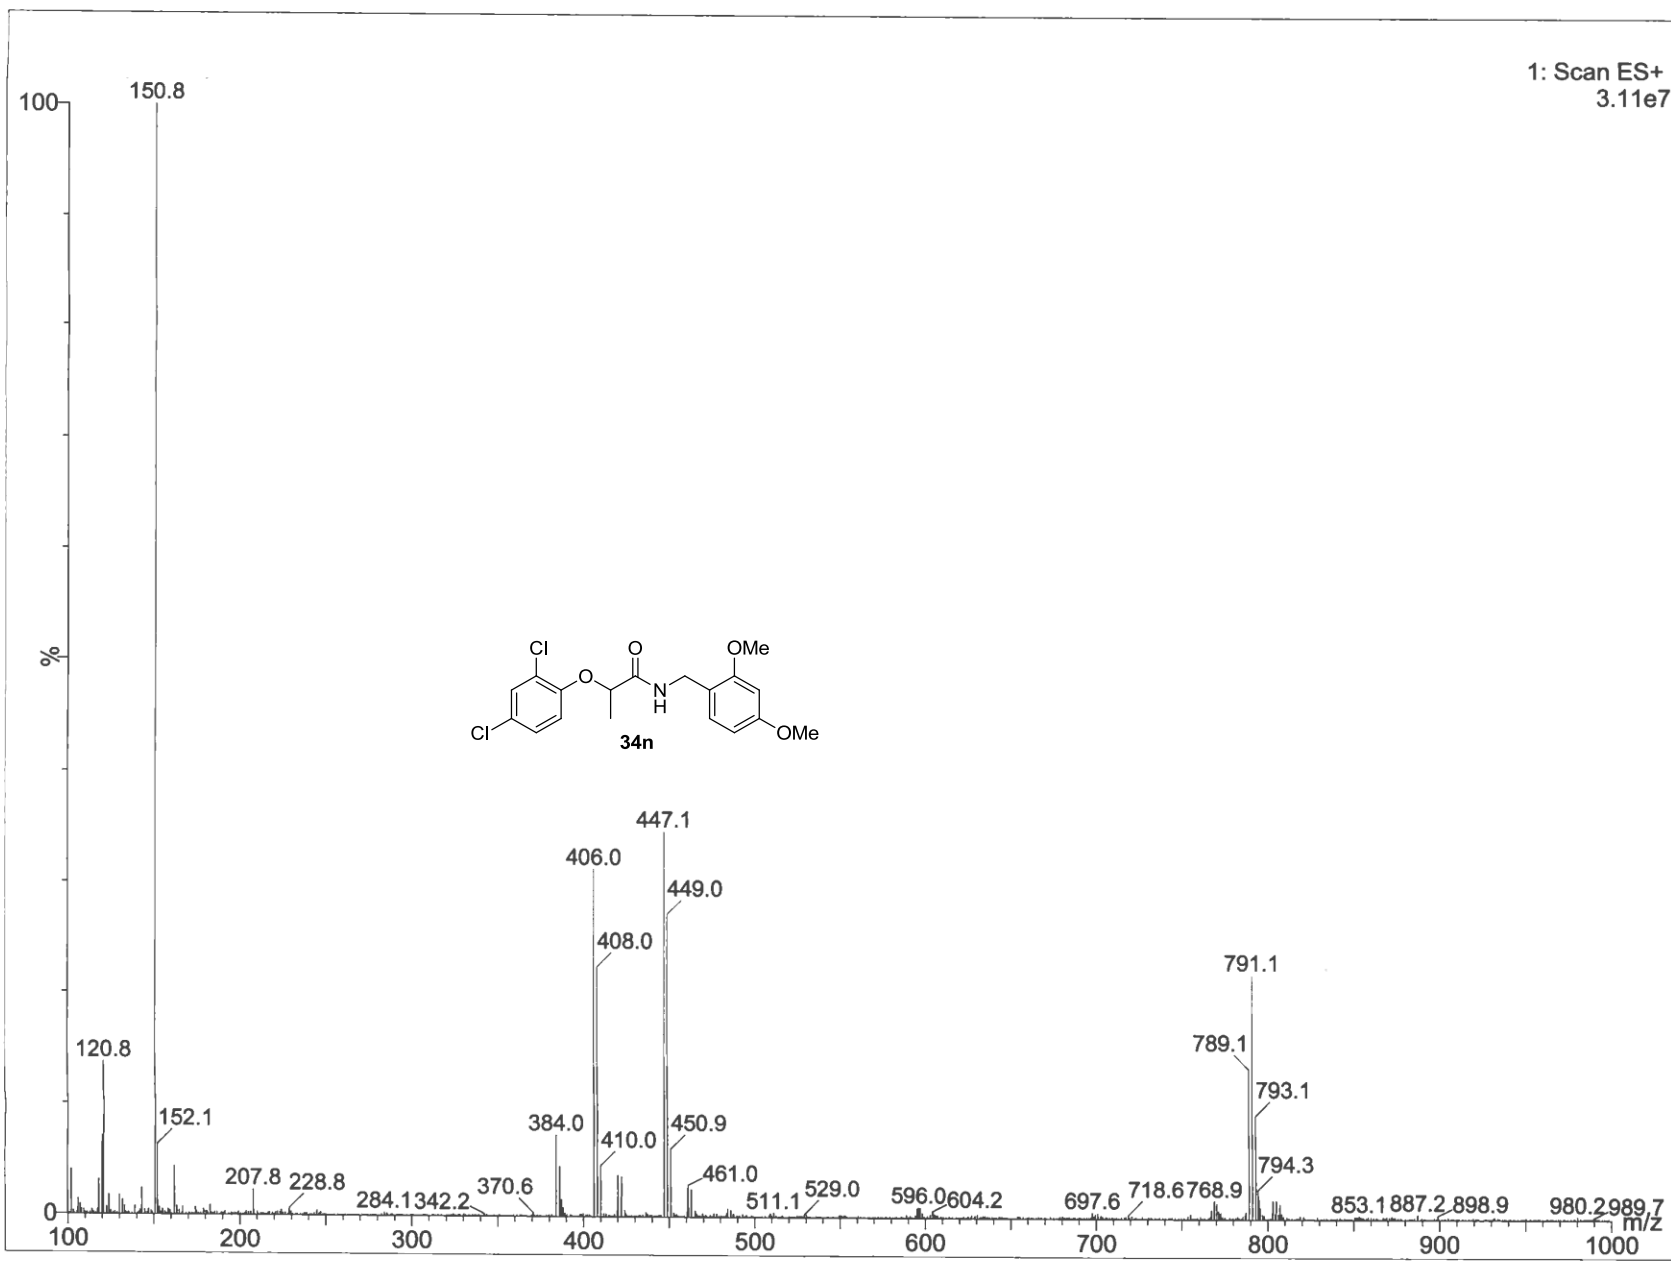

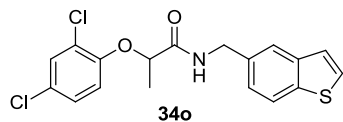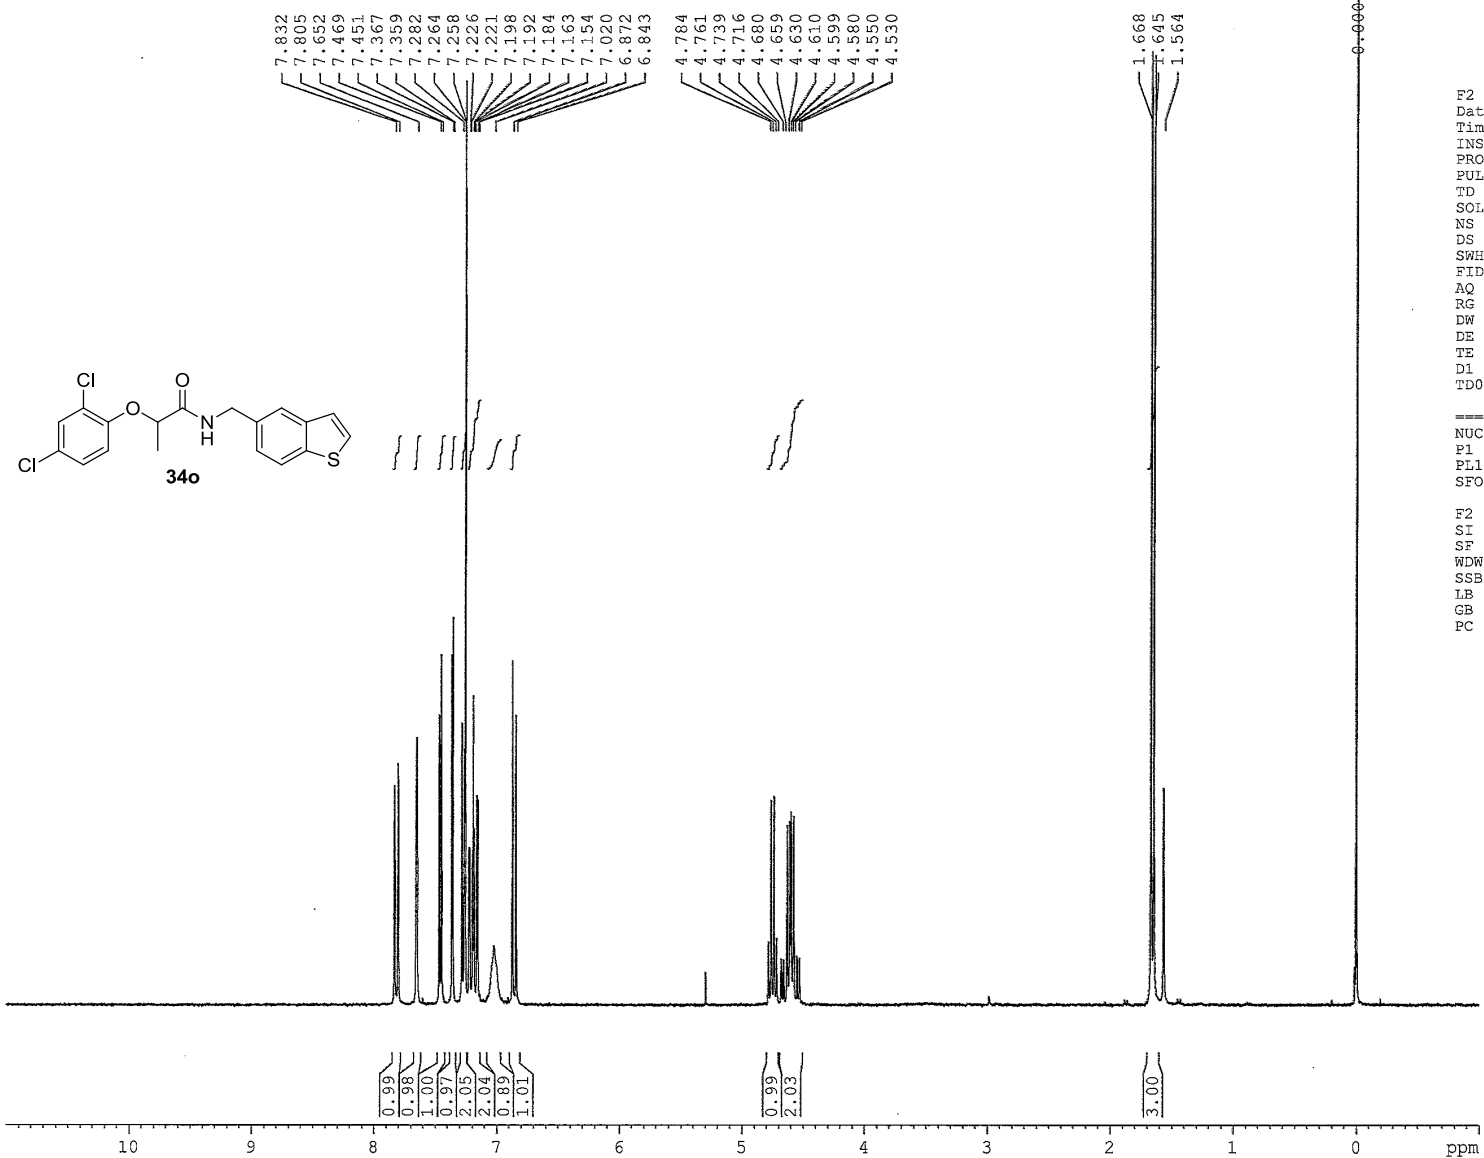

F2 - Acquisition Parameters  
 Date\_ 20100511  
 Time\_ 11.12  
 INSTRUM spect  
 PROBRD 5 mm BBO BB-1H  
 PULPROG zg30  
 TD 65536  
 SOLVENT CDCl3  
 NS 16  
 DS 2  
 SWH 6172.839 Hz  
 FIDRES 0.094190 Hz  
 AQ 5.3084660 sec  
 RG 1625.5  
 DW 81.000 usec  
 DE 6.50 usec  
 TE 298.2 K  
 D1 1.00000000 sec  
 TD0 1

===== CHANNEL f1 =====  
 NUC1 1H  
 P1 10.00 usec  
 PL1 9.20 dB  
 SFO1 299.5718500 MHz

F2 - Processing parameters  
 SI 32768  
 SF 299.5700037 MHz  
 WDW EM  
 SSB 0  
 LB 0.30 Hz  
 GB 0  
 PC 1.00

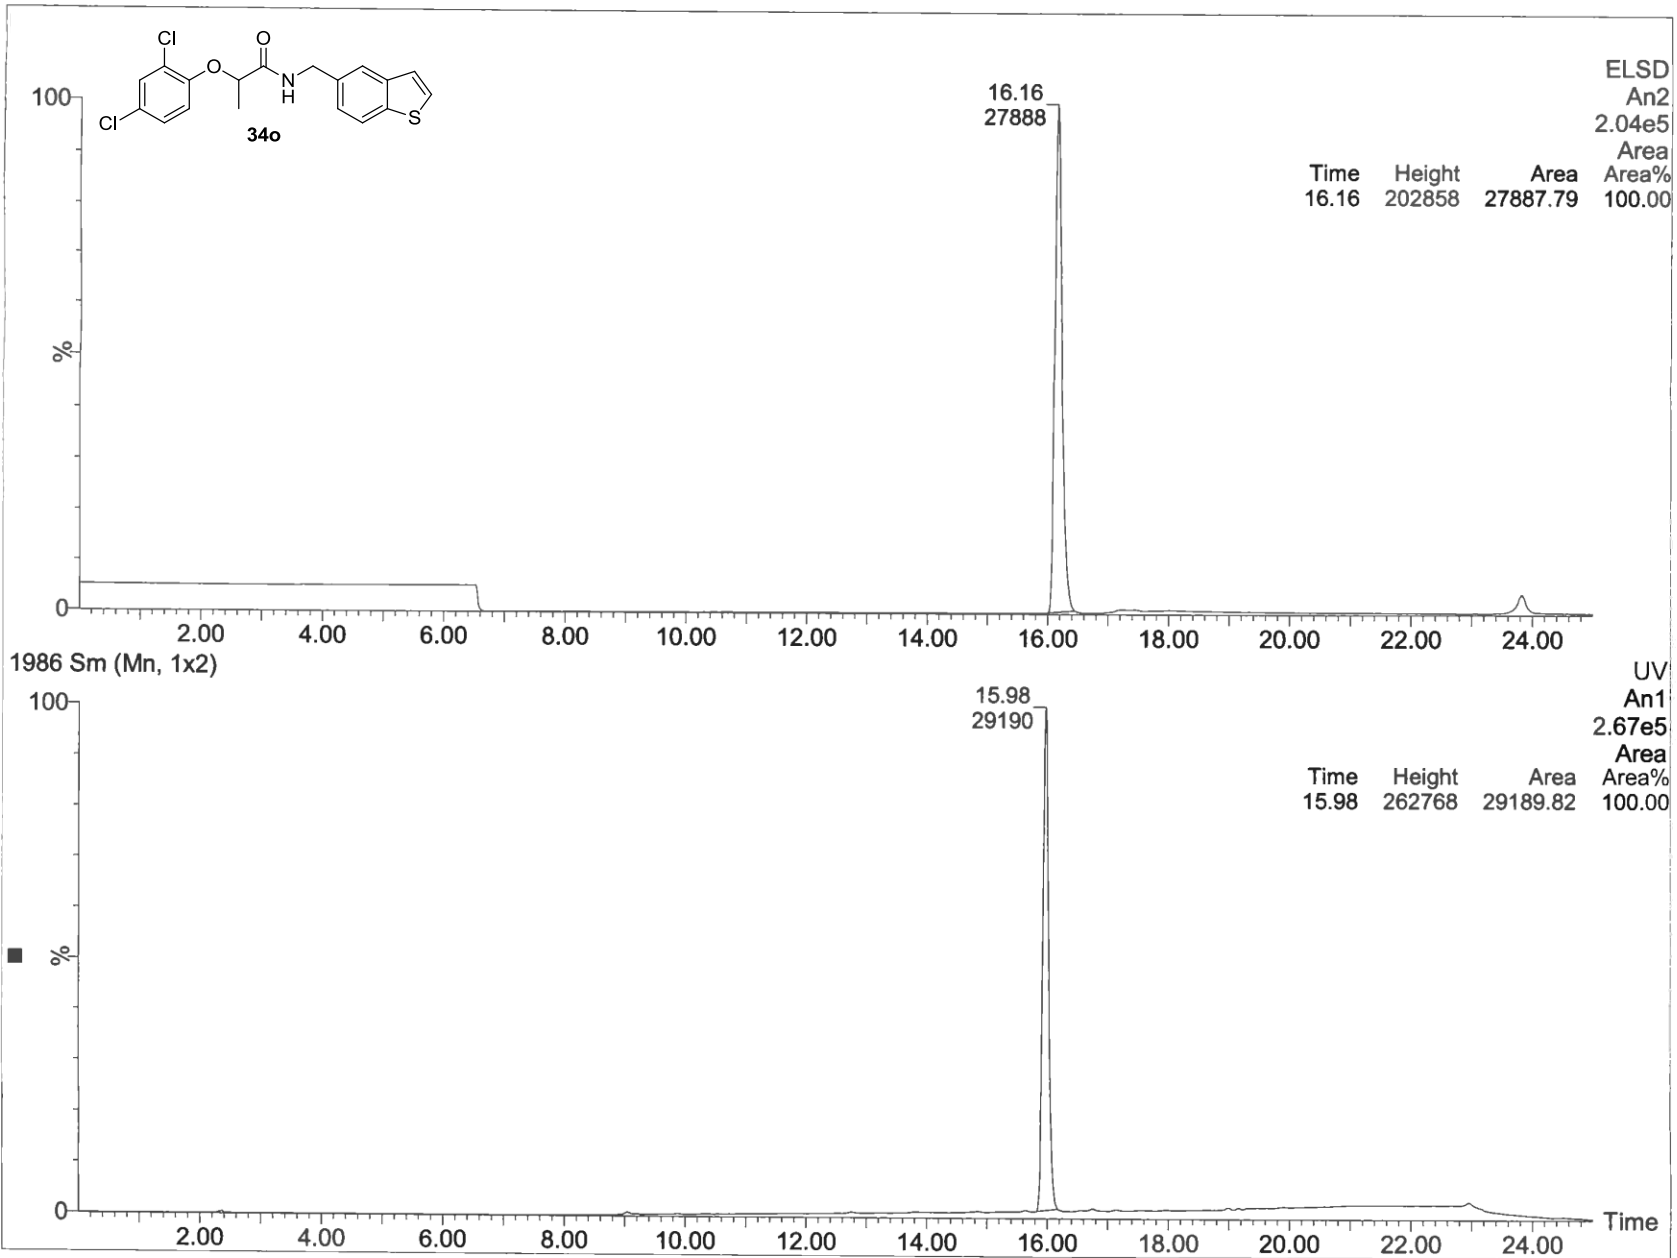

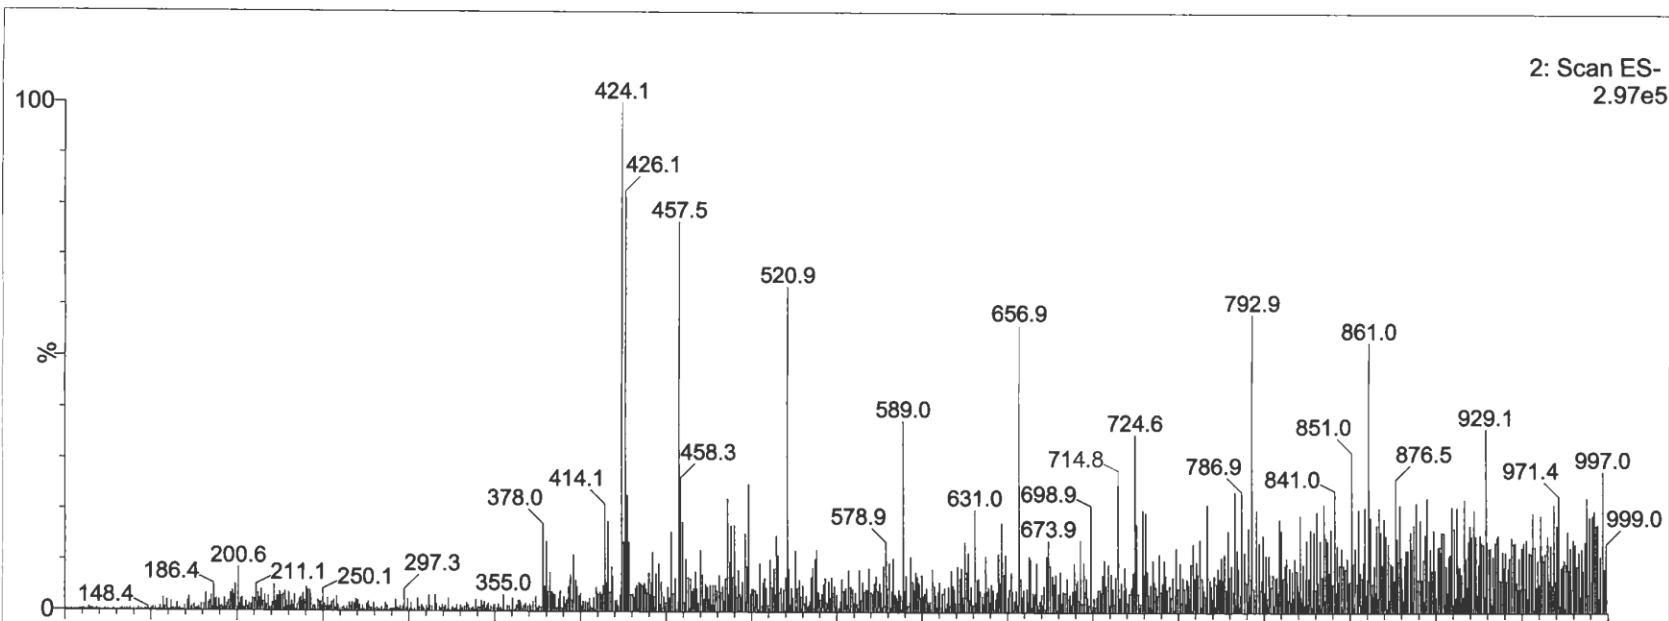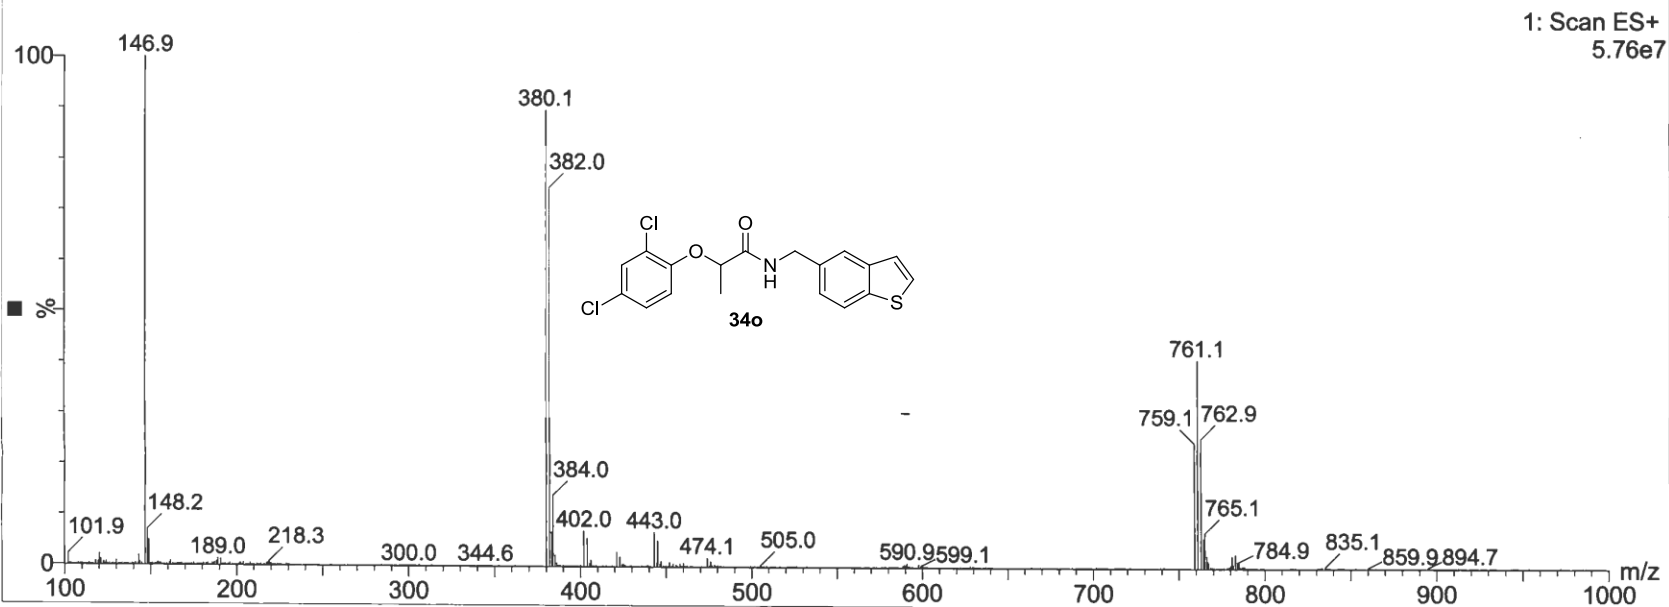

34p

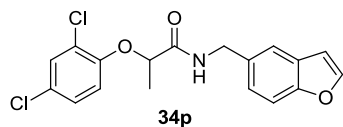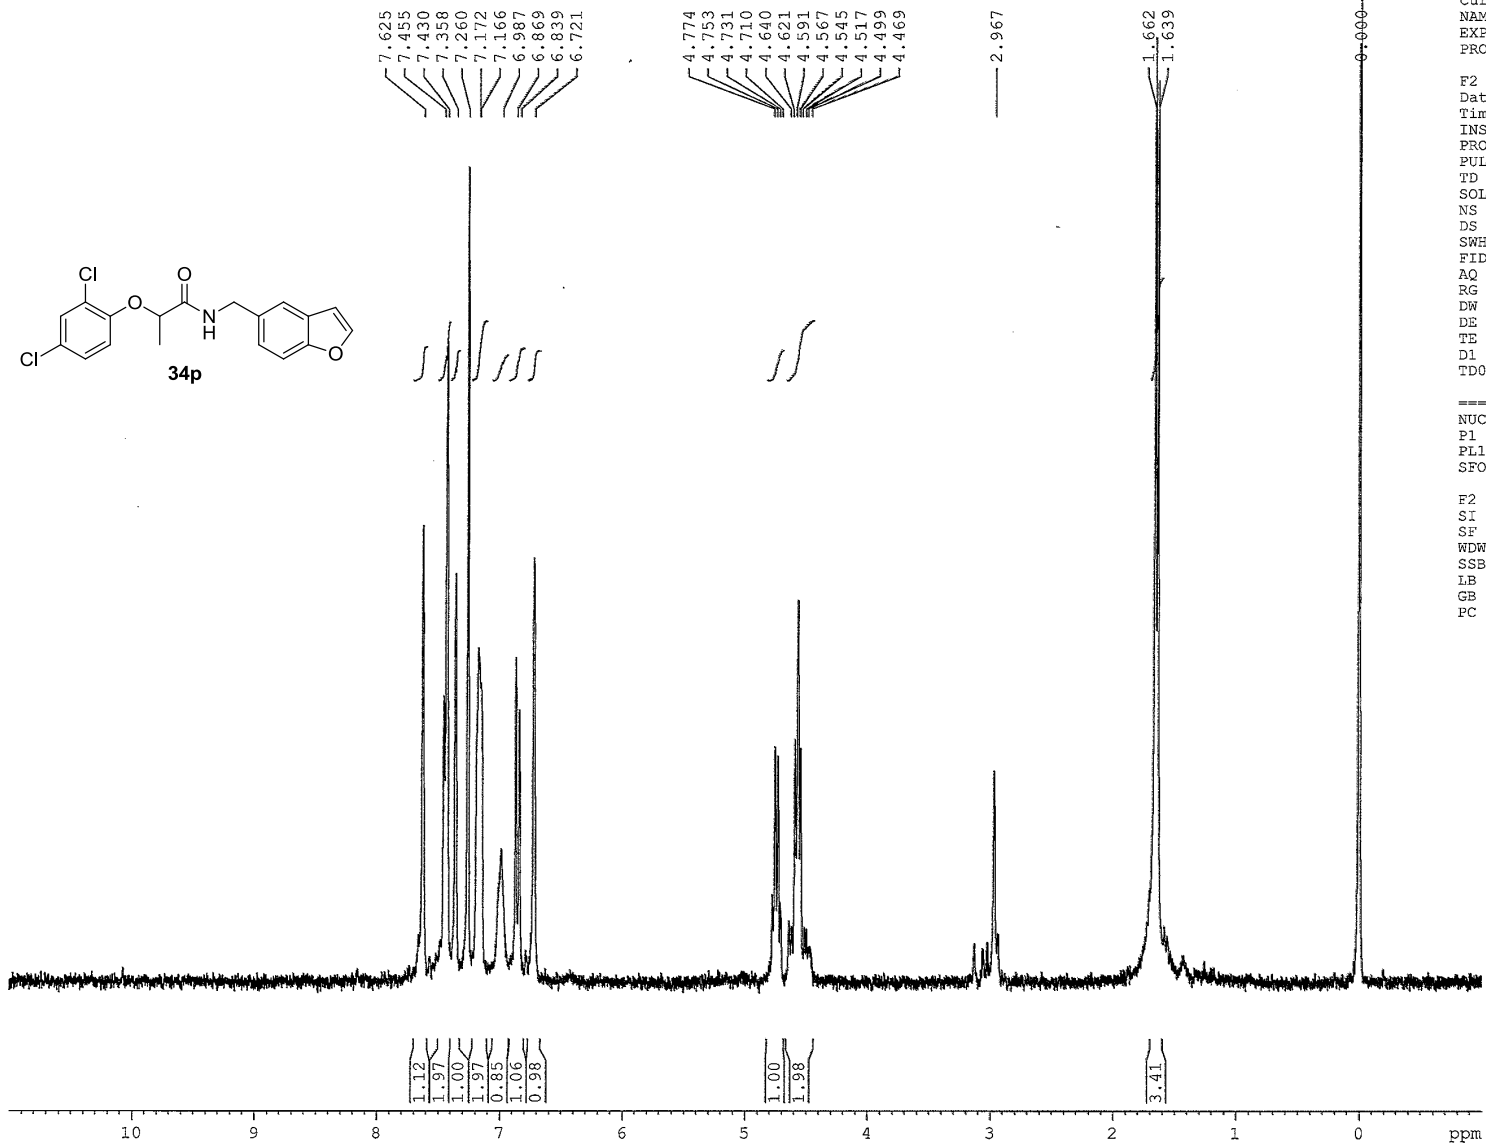

Current Data Parameters  
 NAME MT-251-143  
 EXPNO 41  
 PROCNO 1

F2 - Acquisition Parameters  
 Date\_ 20111114  
 Time\_ 11.08  
 INSTRUM spect  
 PROBHD 5 mm BBO BB-1H  
 PULPROG zg30  
 TD 65536  
 SOLVENT CDCl3  
 NS 16  
 DS 2  
 SWH 6172.839 Hz  
 FIDRES 0.094190 Hz  
 AQ 5.3084660 sec  
 RG 2580.3  
 DW 81.000 usec  
 DE 6.50 usec  
 TE 298.2 K  
 D1 1.0000000 sec  
 TDO 1

----- CHANNEL f1 -----  
 NUC1 1H  
 P1 10.00 usec  
 PL1 9.20 dB  
 SFO1 299.5018495 MHz

F2 - Processing parameters  
 SI 32768  
 SF 299.5000058 MHz  
 WDW EM  
 SSB 0  
 LB 0.30 Hz  
 GB 0  
 PC 1.00

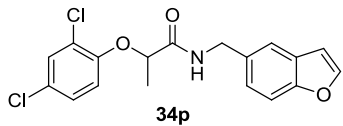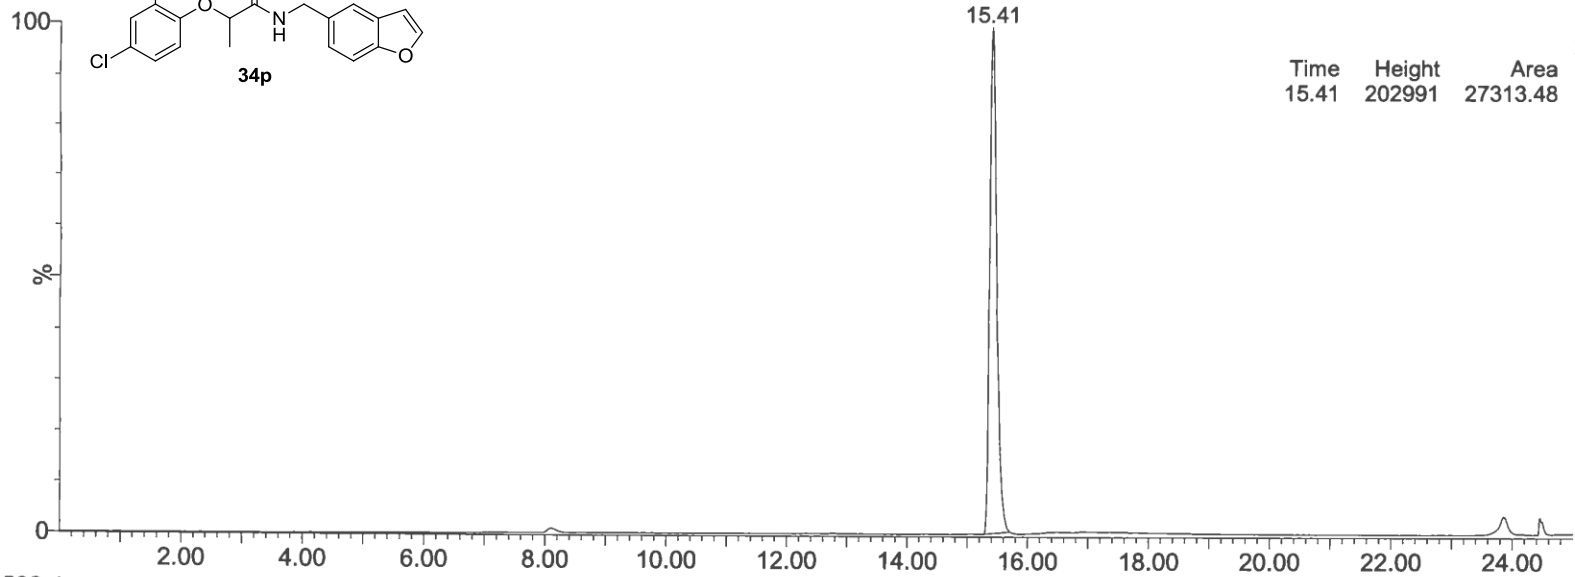

ELSD  
An2  
2.04e5

| Time  | Height | Area     | Area%  |
|-------|--------|----------|--------|
| 15.41 | 202991 | 27313.48 | 100.00 |

2592-1

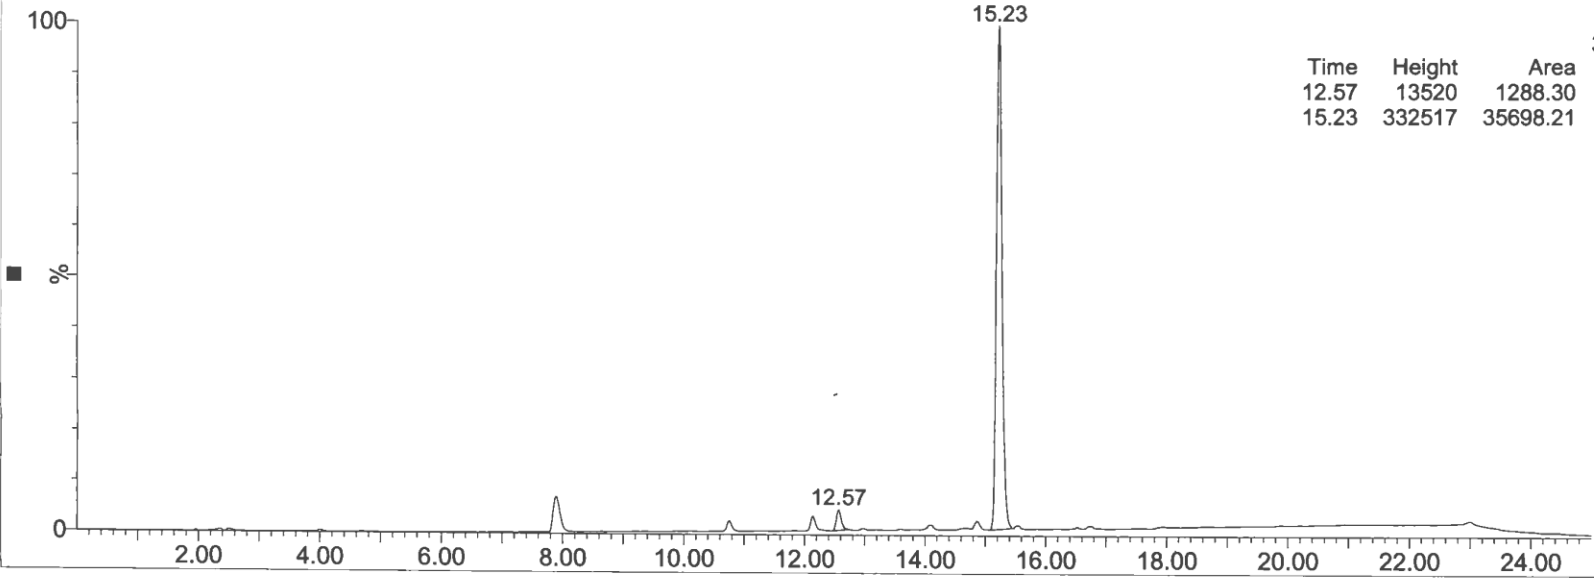

UV  
An1  
3.37e5

| Time  | Height | Area     | Area% |
|-------|--------|----------|-------|
| 12.57 | 13520  | 1288.30  | 3.48  |
| 15.23 | 332517 | 35698.21 | 96.52 |

1: Scan ES+  
5.49e7

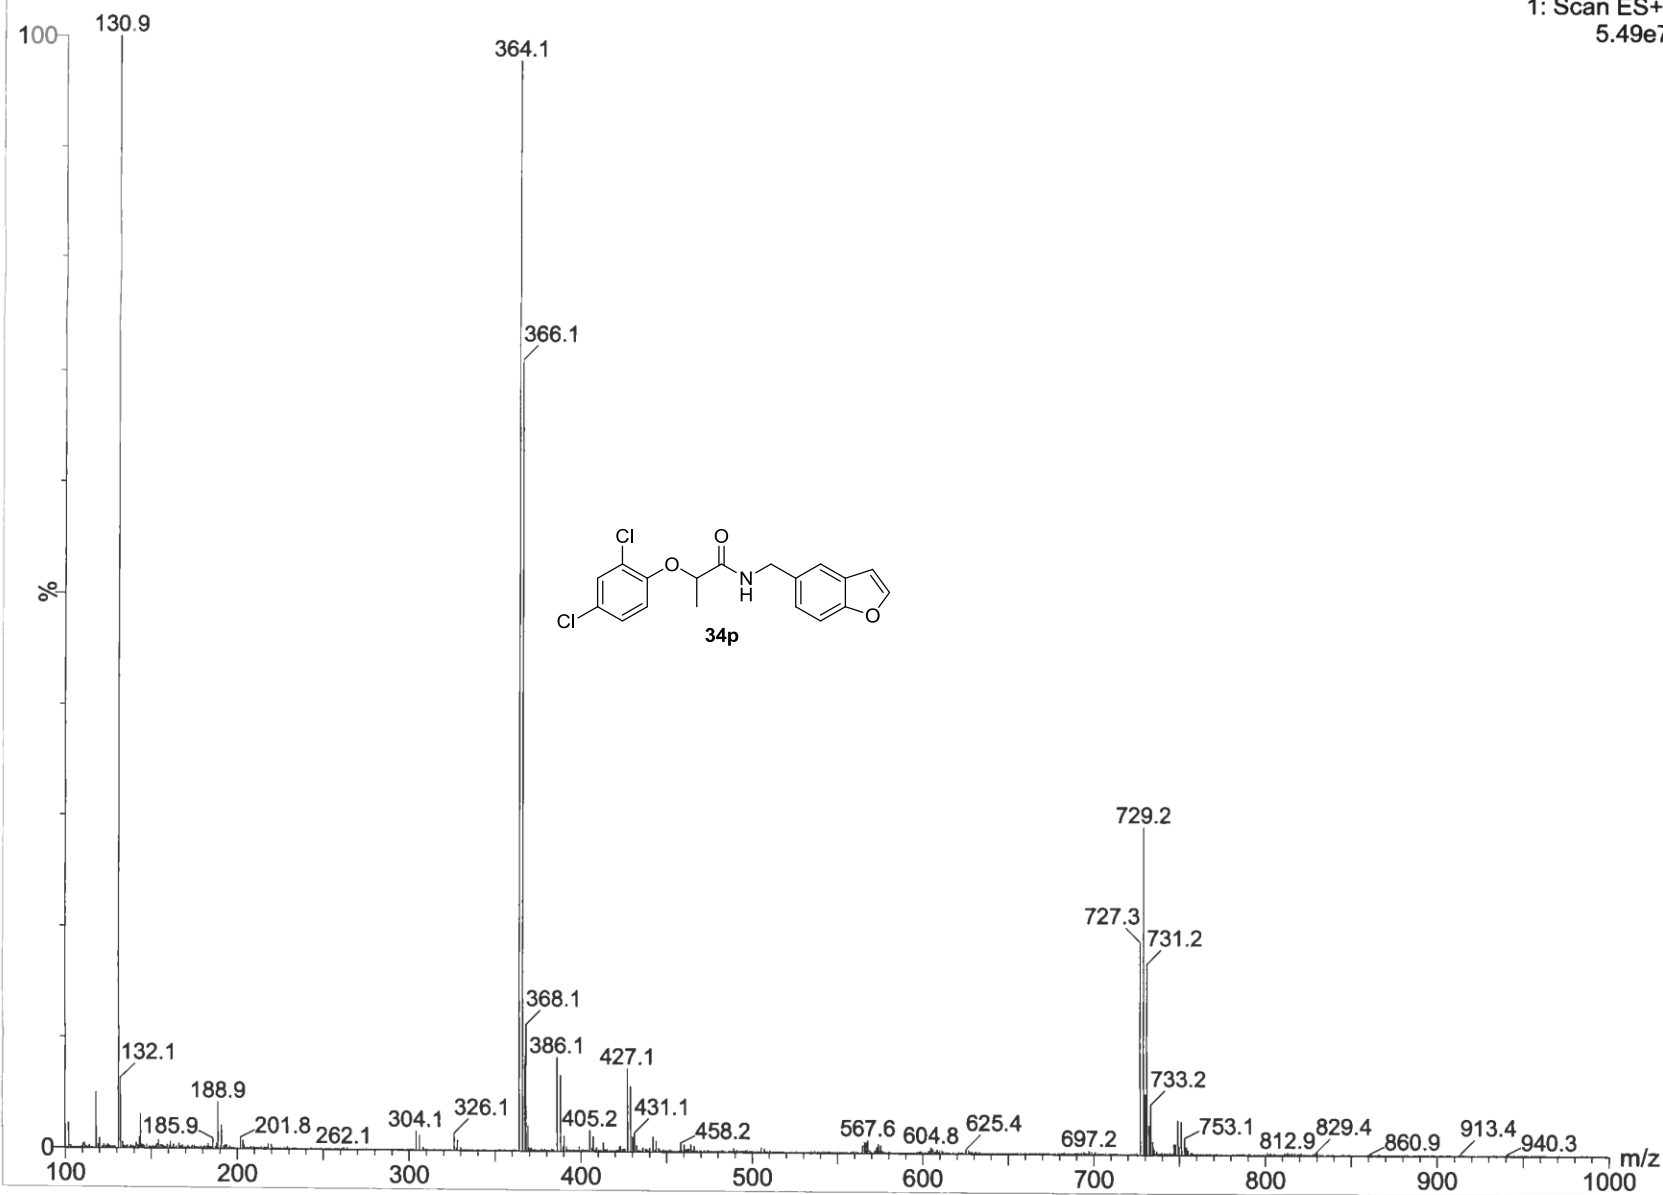



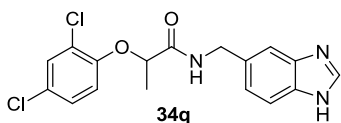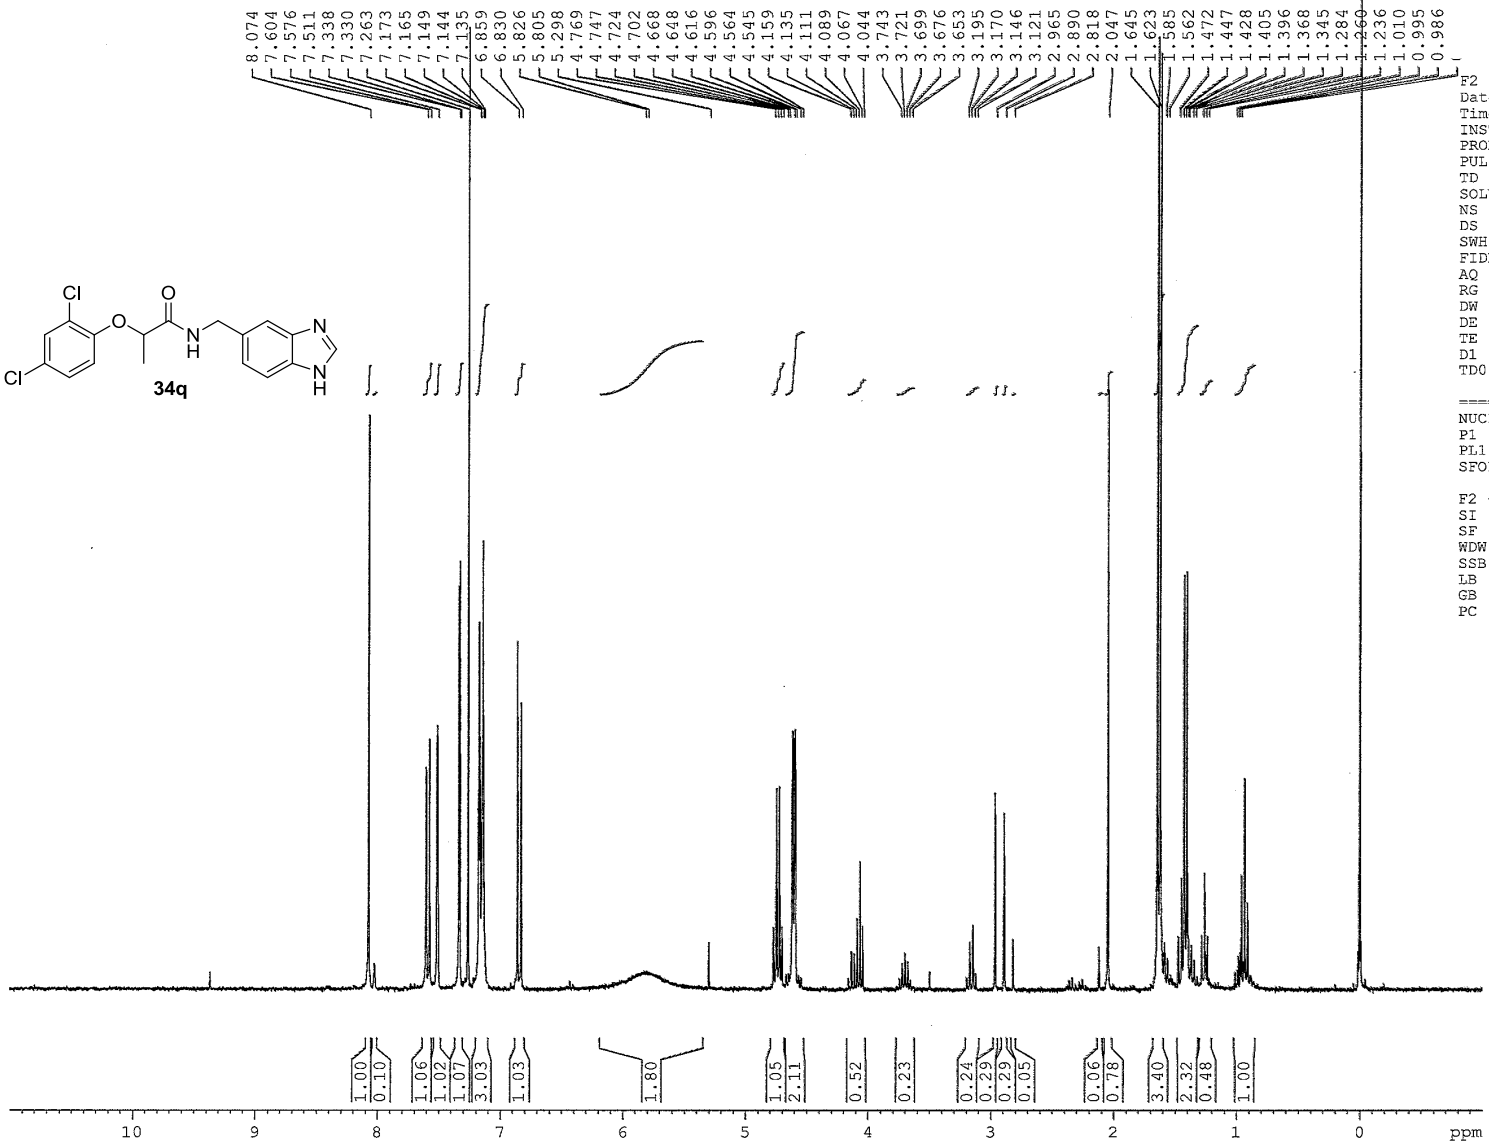

F2 - Acquisition Parameters  
 Date 20111206  
 Time 14.55  
 INSTRUM spect  
 PROBHD 5 mm BBO BB-1H  
 PULPROG zg30  
 TD 65536  
 SOLVENT CDCl3  
 NS 16  
 DS 2  
 SWH 6172.839 Hz  
 FIDRES 0.094190 Hz  
 AQ 5.3084660 sec  
 RG 2298.8  
 DW 81.000 usec  
 DE 6.50 usec  
 TE 298.2 K  
 D1 1.00000000 sec  
 TD0 1

==== CHANNEL f1 =====  
 NUC1 1H  
 P1 10.00 usec  
 PL1 9.20 dB  
 SFO1 299.5018495 MHz

F2 - Processing parameters  
 SI 32768  
 SF 299.5000048 MHz  
 WDW EM  
 SSB 0  
 LB 0.30 Hz  
 GB 0  
 PC 1.00

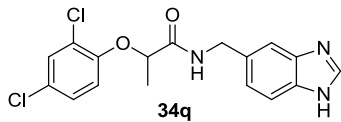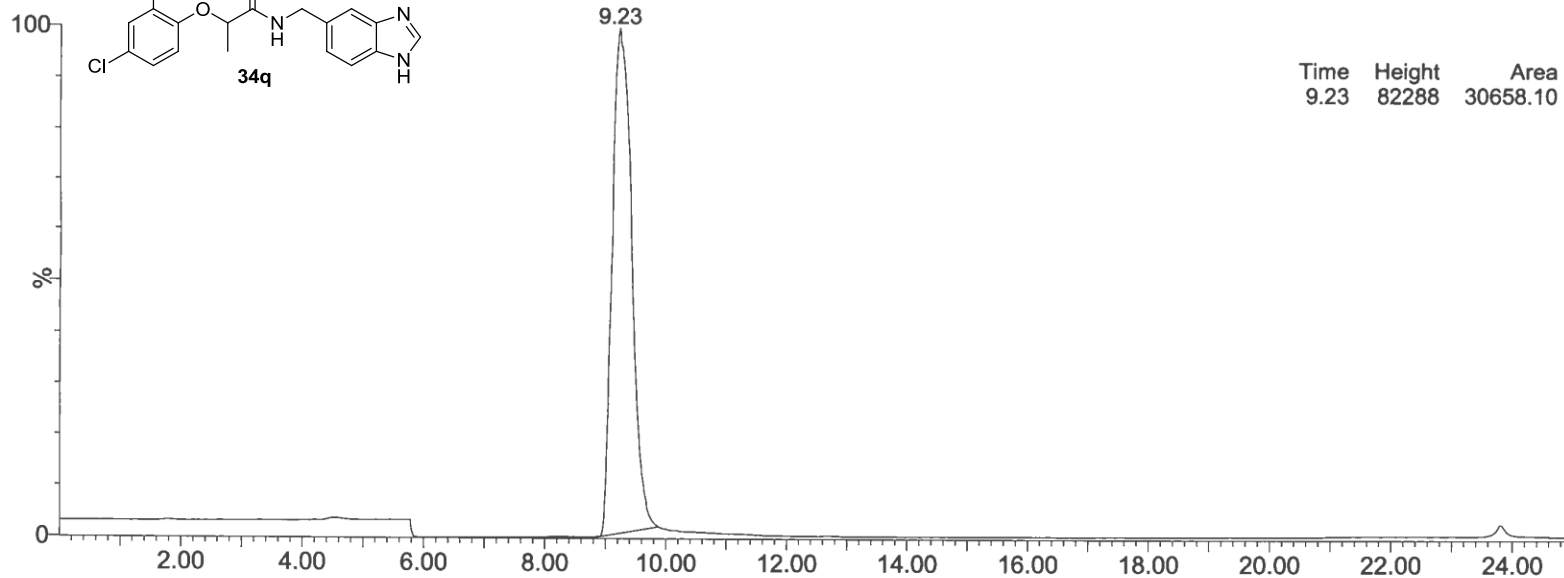

ELSD  
An2  
8.30e4

| Time | Height | Area     | Area%  |
|------|--------|----------|--------|
| 9.23 | 82288  | 30658.10 | 100.00 |

2593-1

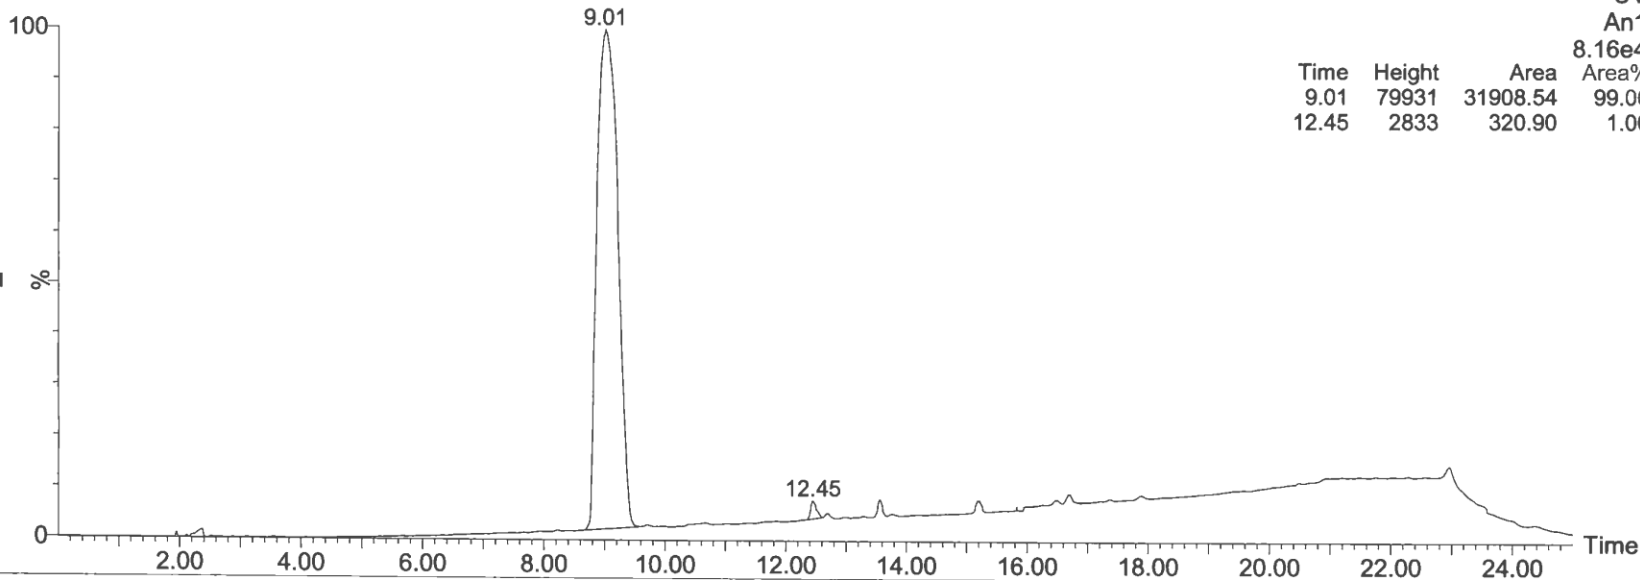

UV  
An1  
8.16e4

| Time  | Height | Area     | Area% |
|-------|--------|----------|-------|
| 9.01  | 79931  | 31908.54 | 99.00 |
| 12.45 | 2833   | 320.90   | 1.00  |

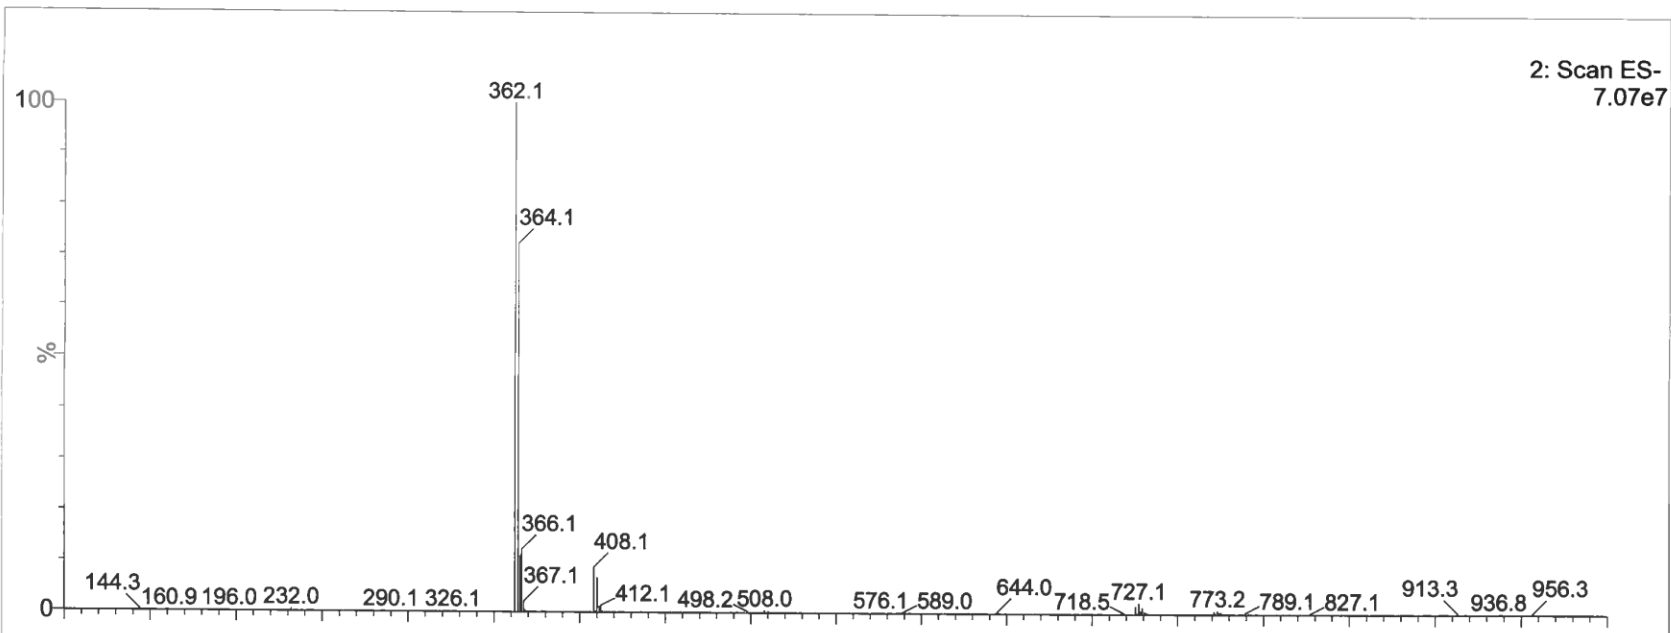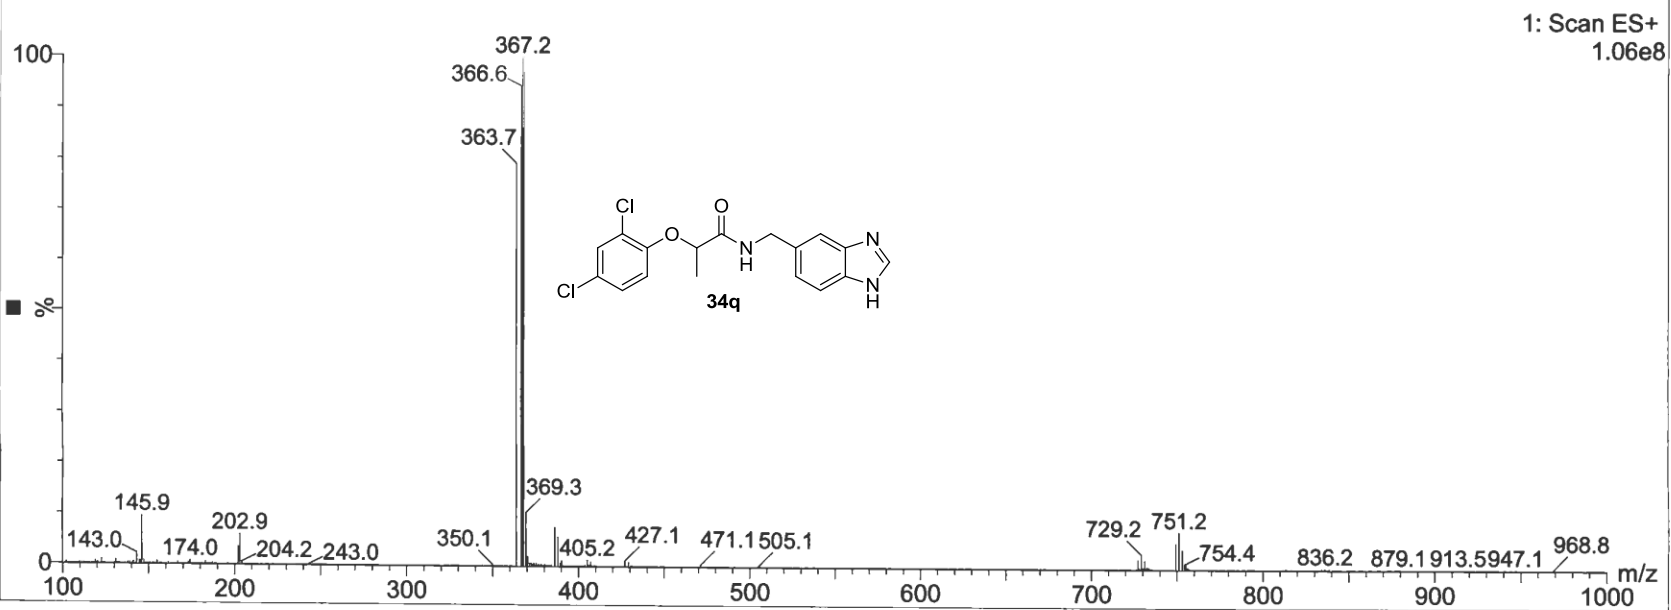

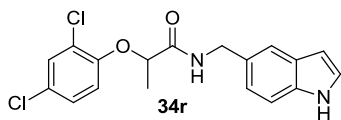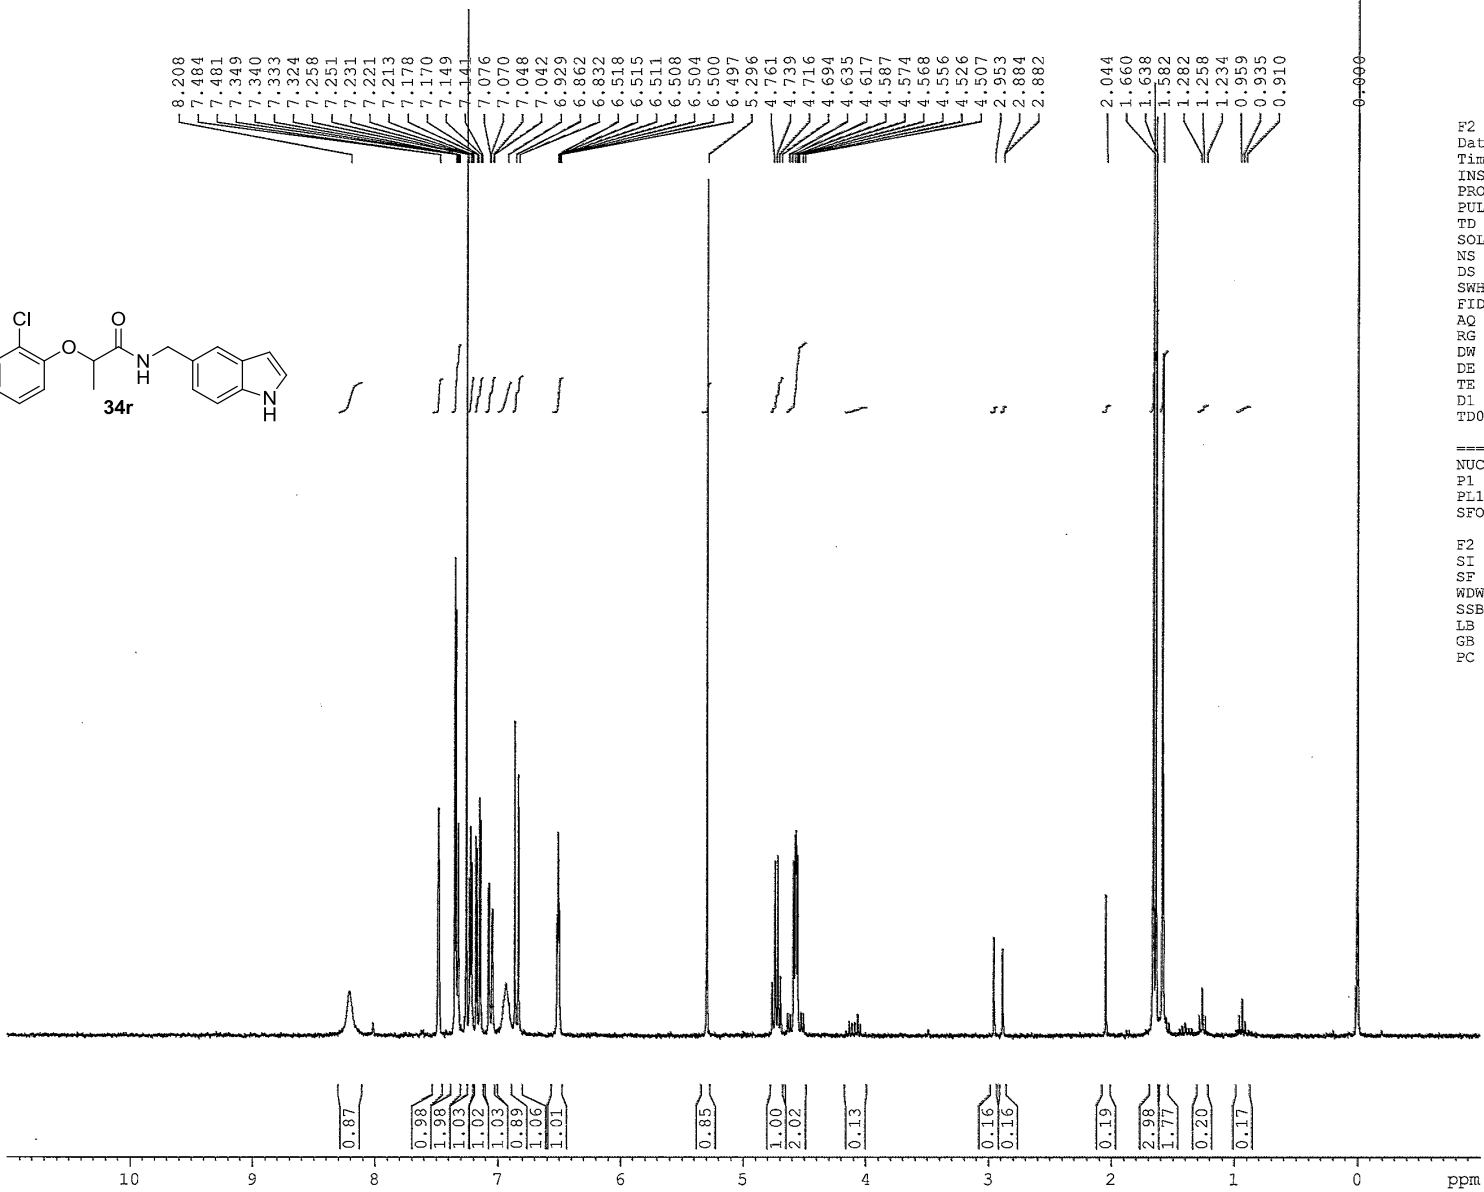

F2 - Acquisition Parameters  
 Date\_ 20111206  
 Time\_ 14.43  
 INSTRUM spect  
 PROBHD 5 mm BBO BB-1H  
 PULPROG zg30  
 TD 65536  
 SOLVENT CDCl3  
 NS 16  
 DS 2  
 SWH 6172.839 Hz  
 FIDRES 0.094190 Hz  
 AQ 5.3084660 sec  
 RG 2580.3  
 DW 81.000 usec  
 DE 6.50 usec  
 TE 298.2 K  
 D1 1.00000000 sec  
 TD0 1

===== CHANNEL f1 =====  
 NUC1 1H  
 P1 10.00 usec  
 PL1 9.20 dB  
 SFO1 299.5018495 MHz

F2 - Processing parameters  
 SI 32768  
 SF 299.5000063 MHz  
 WDW EM  
 SSB 0  
 LB 0.30 Hz  
 GB 0  
 PC 1.00

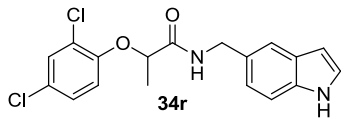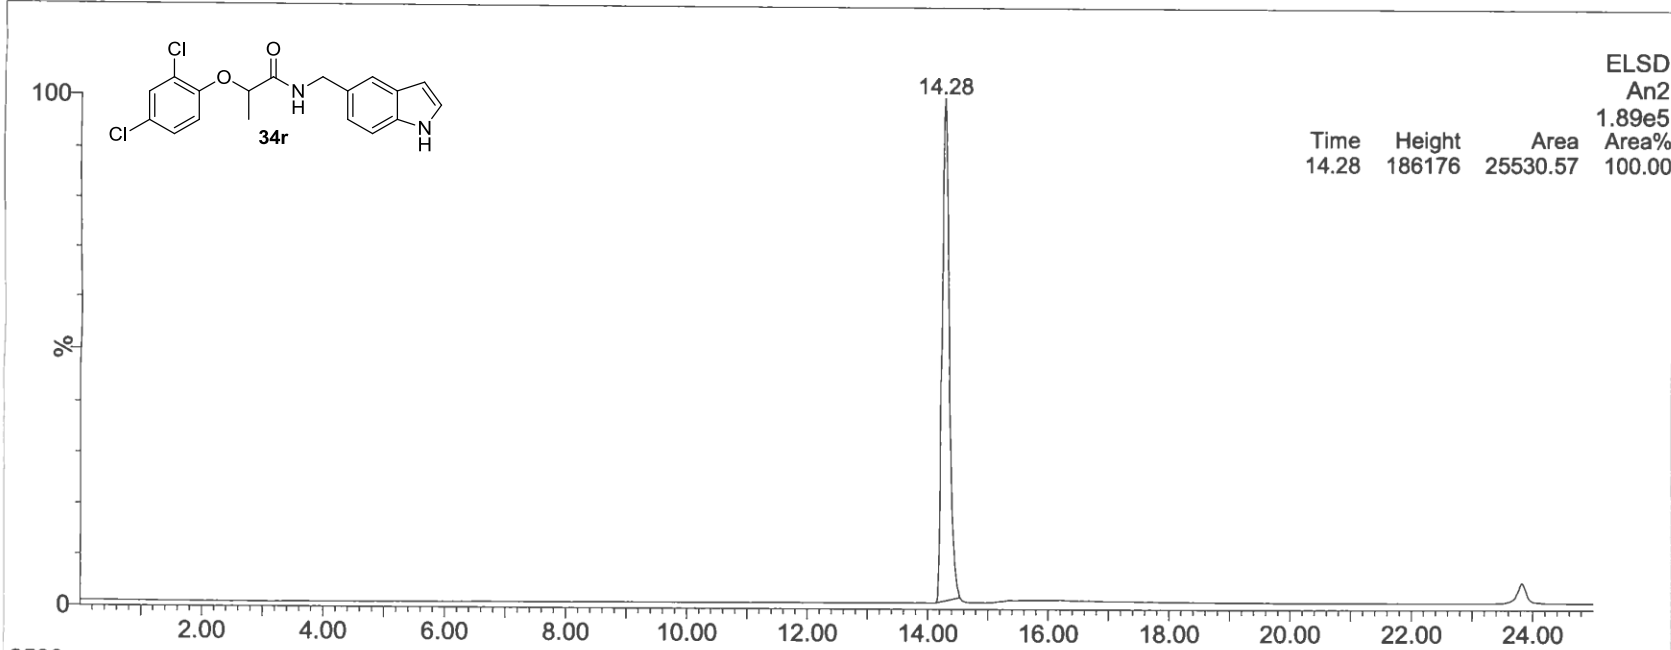

ELSD  
An2  
1.89e5  
Area%

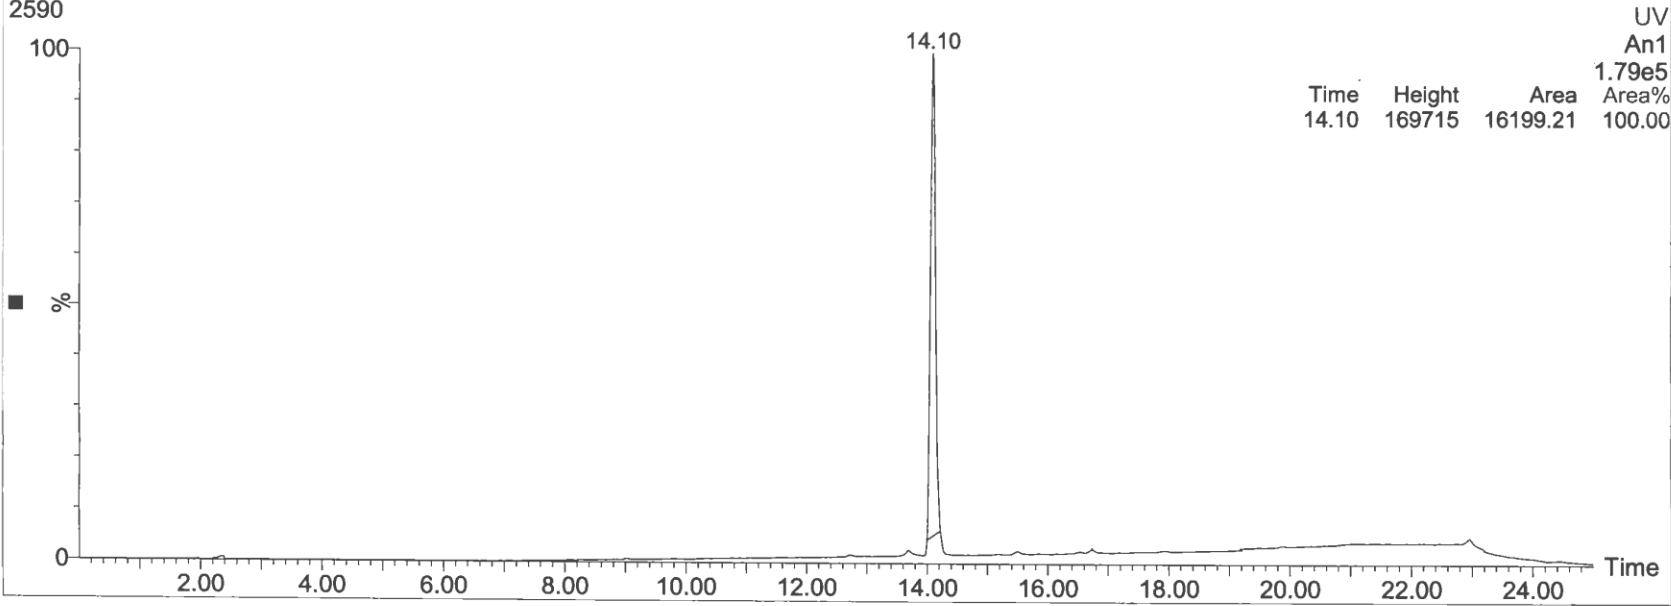

UV  
An1  
1.79e5  
Area%

1: Scan ES+  
1.14e8

100  
129.9

%

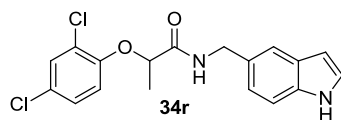

0  
100  
200  
300  
400  
500  
600  
700  
800  
900  
1000  
m/z

131.2

143.9

223.9

234.1

299.4

350.9

363.1

385.1

387.1

389.1

426.1

430.2

488.2

545.1

564.2

574.1

622.3

682.4

727.2

725.3

749.2

751.1

753.1

811.0

828.9

878.8

927.8

939.2

997.7

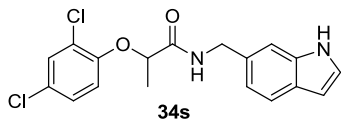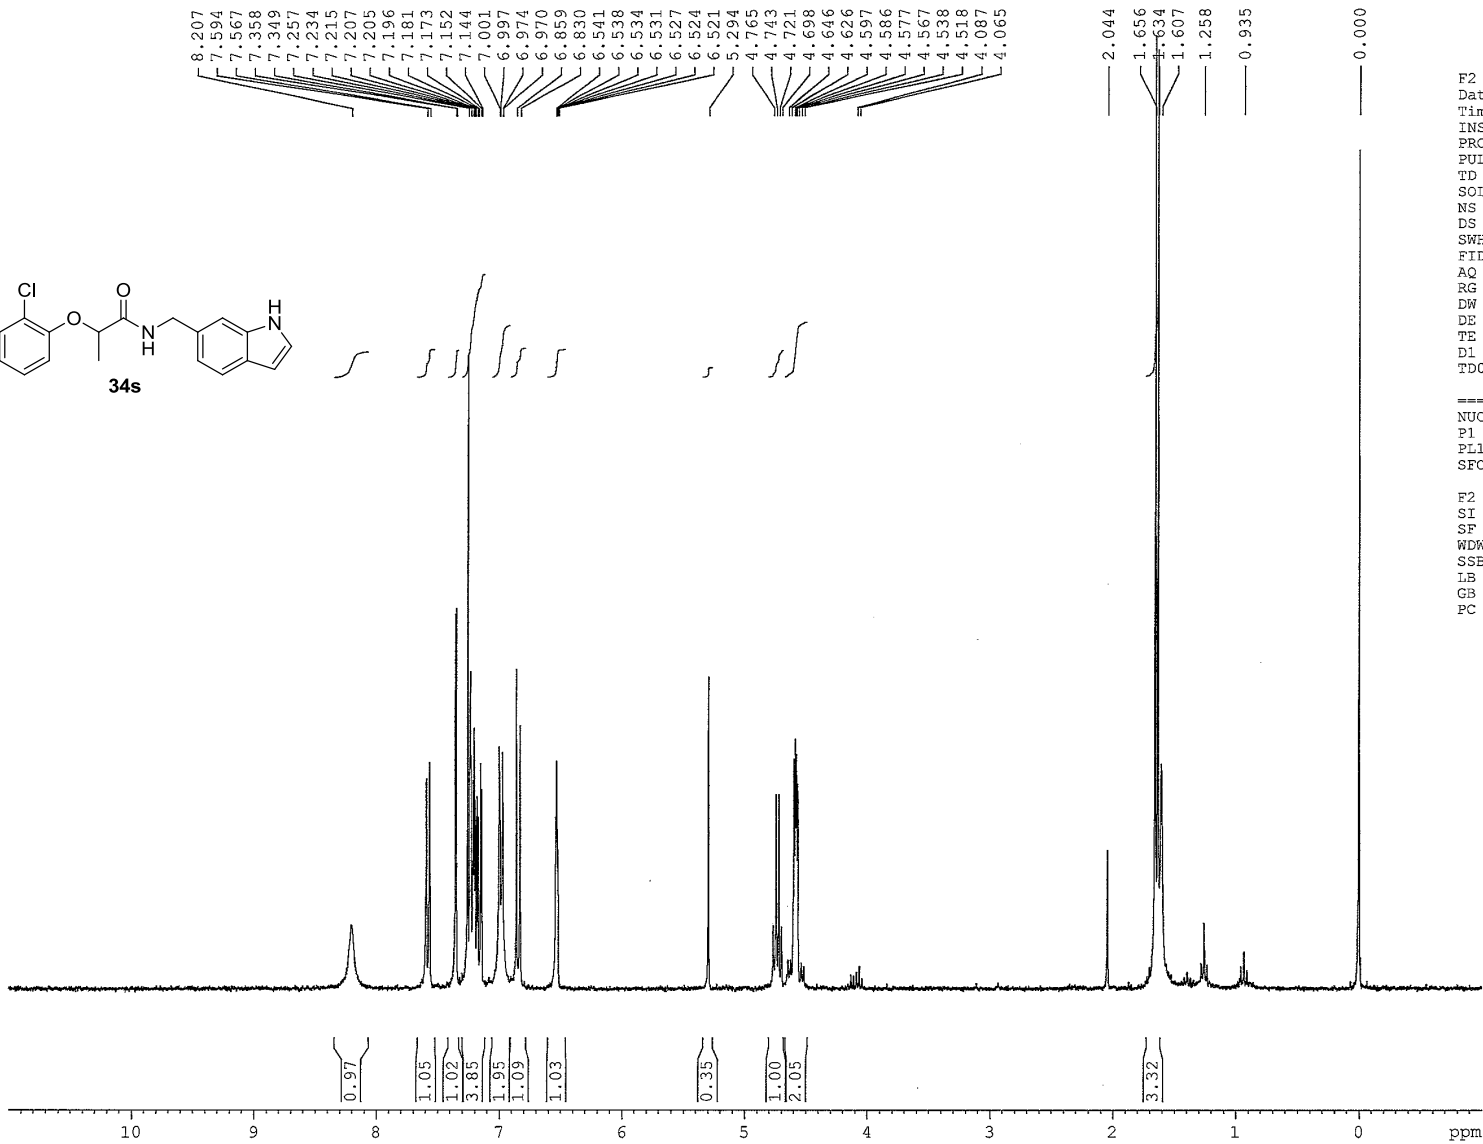

F2 - Acquisition Parameters  
 Date\_ 20111130  
 Time 14.36  
 INSTRUM spect  
 PROBHD 5 mm BBO BB-1H  
 PULPROG zg30  
 TD 65536  
 SOLVENT CDCl3  
 NS 16  
 DS 2  
 SWH 6172.839 Hz  
 FIDRES 0.094190 Hz  
 AQ 5.3084660 sec  
 RG 2298.8  
 DW 81.000 usec  
 DE 6.50 usec  
 TE 298.2 K  
 D1 1.00000000 sec  
 TD0 1

===== CHANNEL f1 =====  
 NUC1 1H  
 P1 10.00 usec  
 PL1 9.20 dB  
 SFO1 299.5018495 MHz

F2 - Processing parameters  
 SI 32768  
 SF 299.5000063 MHz  
 WDW EM  
 SSB 0  
 LB 0.30 Hz  
 GB 0  
 PC 1.00

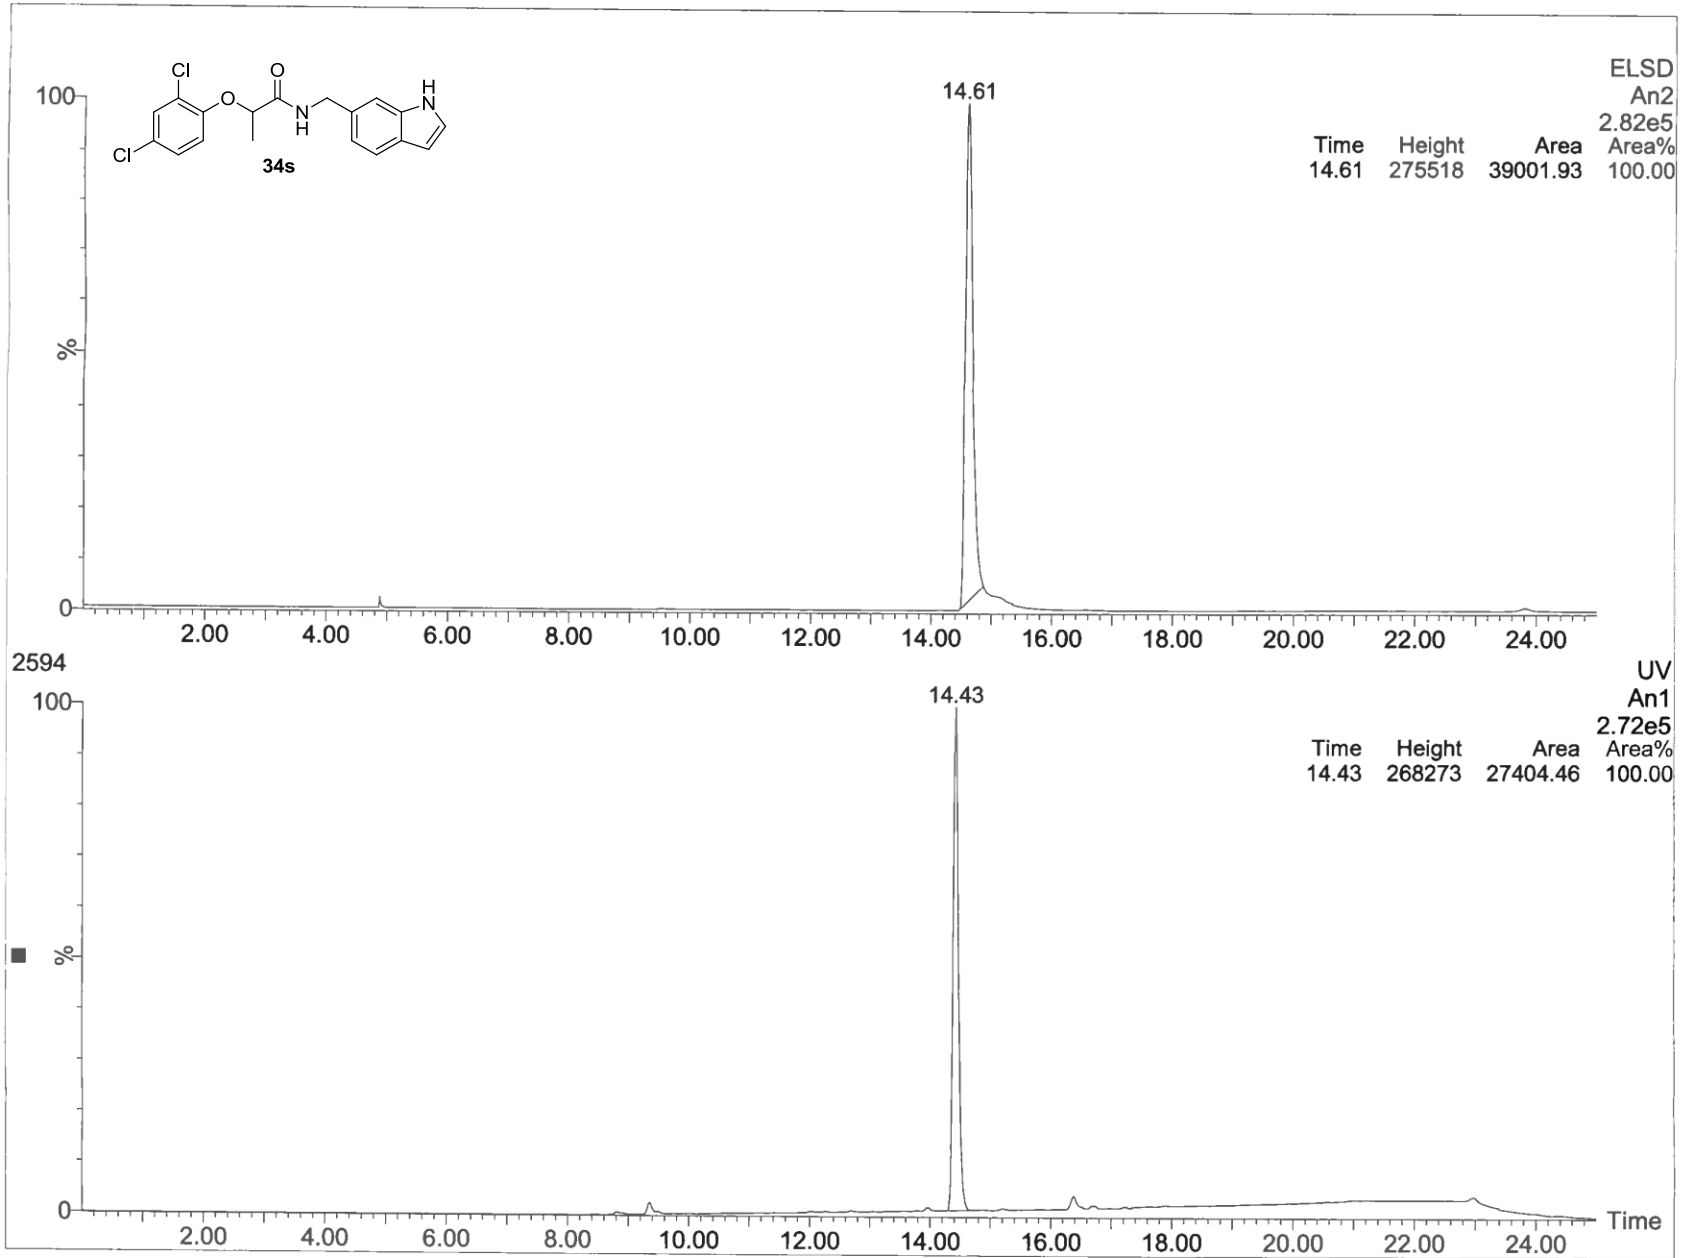



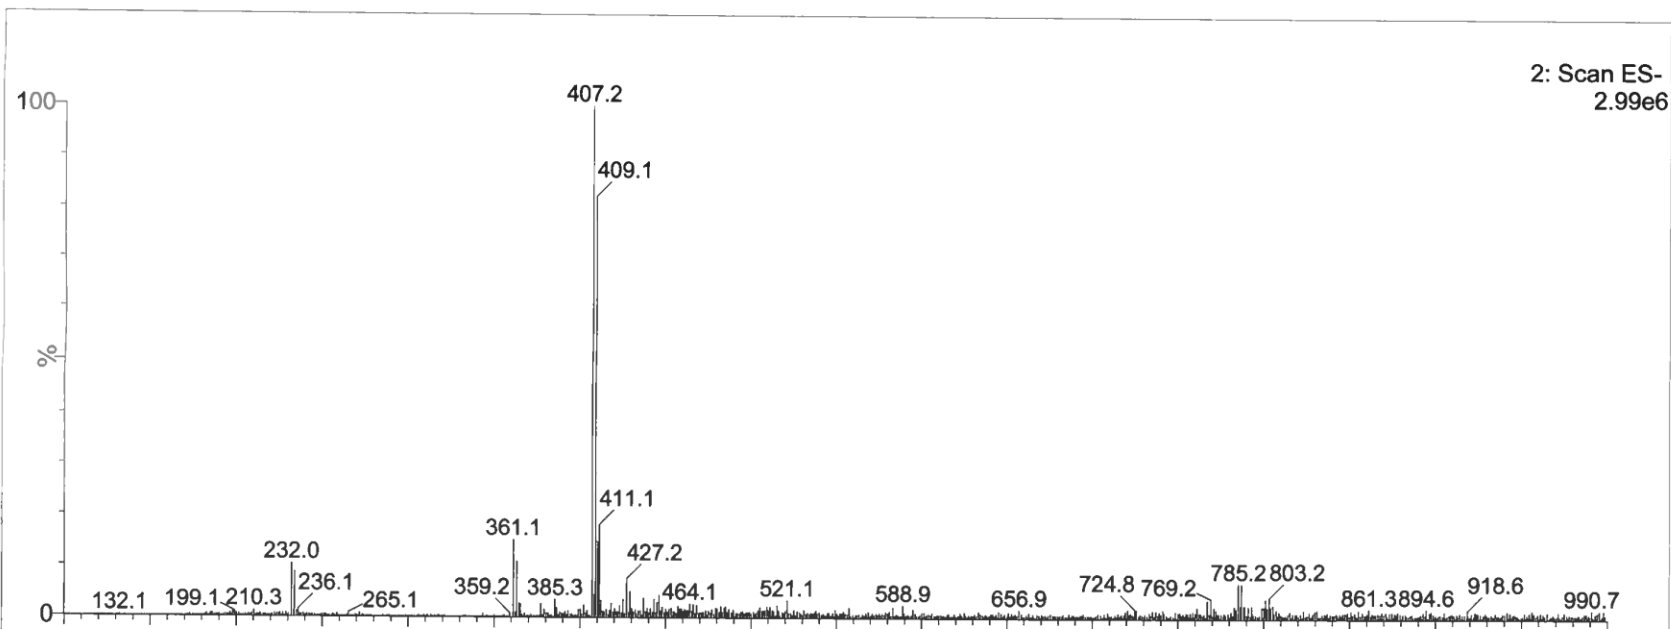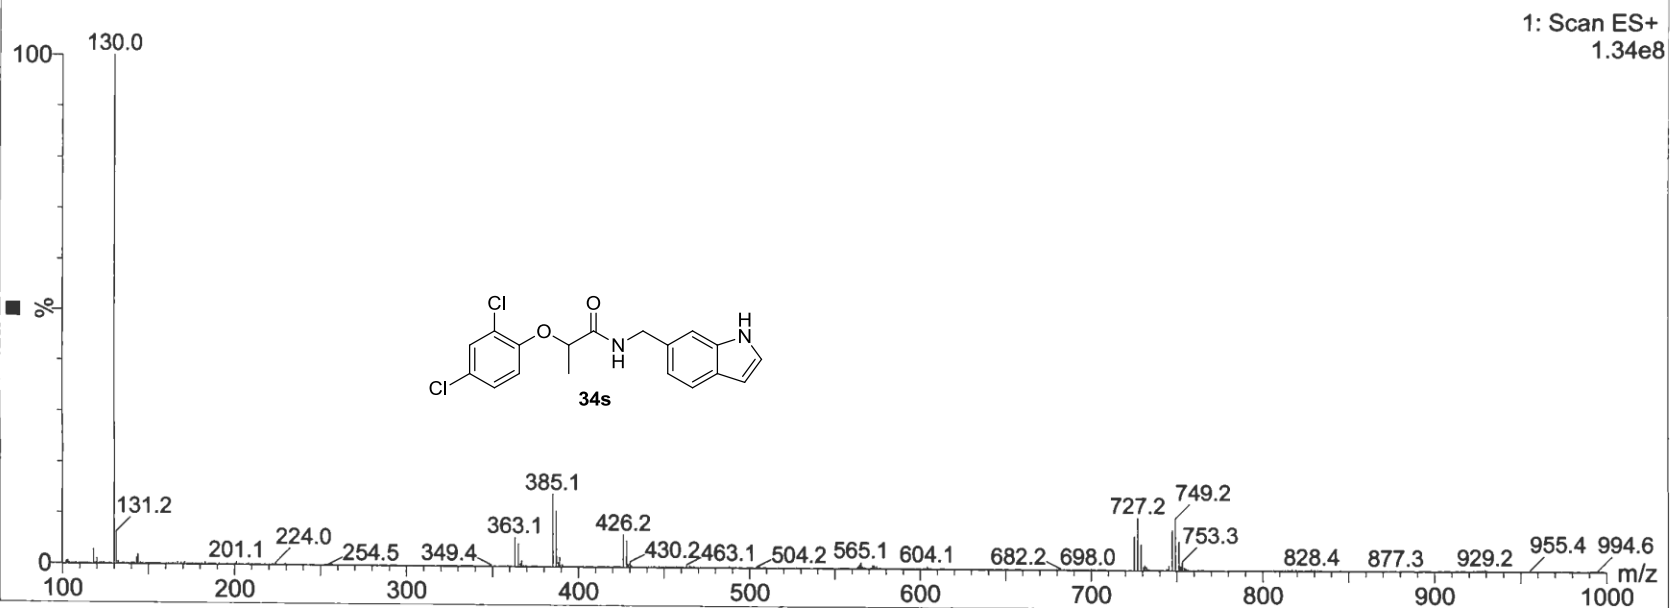

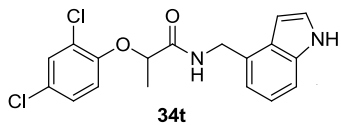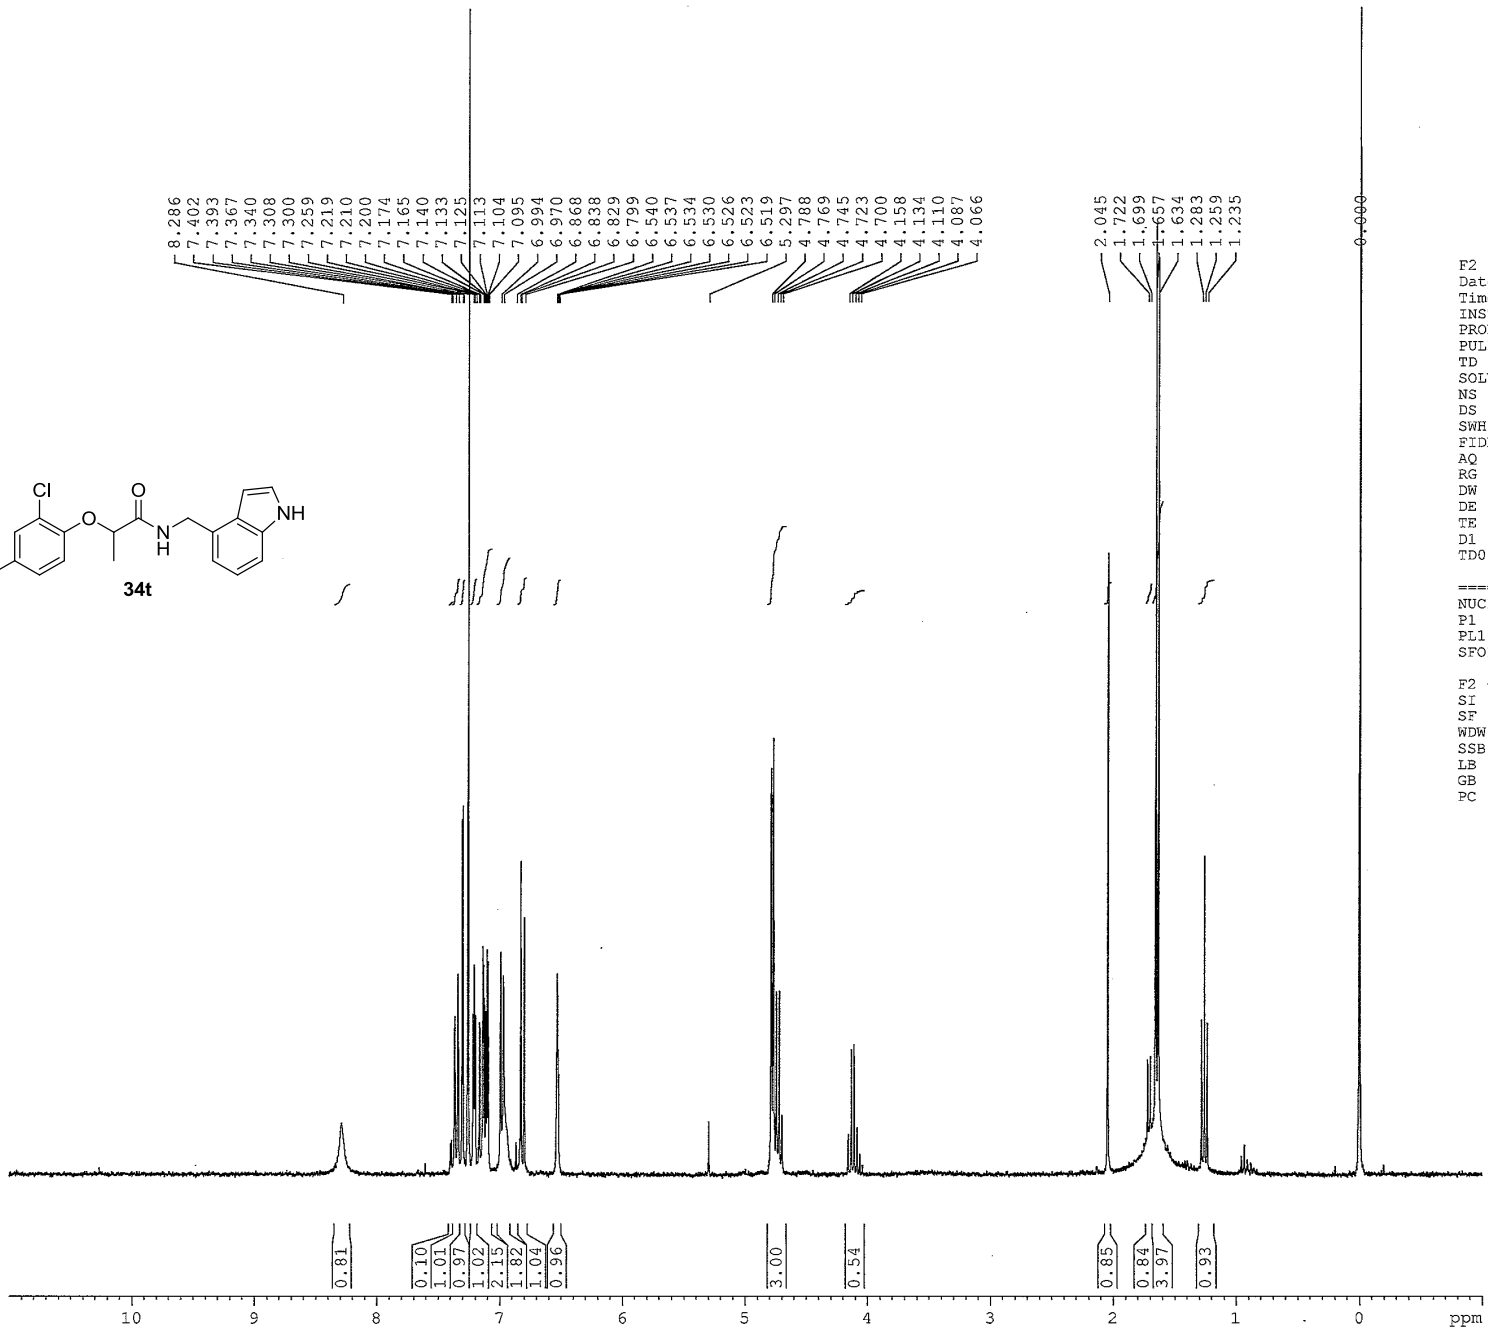

F2 - Acquisition Parameters  
 Date\_ 20100524  
 Time\_ 10.35  
 INSTRUM spect  
 PROBHD 5 mm BBO BB-1H  
 PULPROG zg30  
 TD 65536  
 SOLVENT CDCl3  
 NS 16  
 DS 2  
 SWH 6172.839 Hz  
 FIDRES 0.094190 Hz  
 AQ 5.3084660 sec  
 RG 1625.5  
 DW 81.000 usec  
 DE 6.50 usec  
 TE 298.2 K  
 D1 1.00000000 sec  
 TDO 1

===== CHANNEL f1 =====  
 NUC1 1H  
 P1 10.00 usec  
 PL1 9.20 dB  
 SFO1 299.5718500 MHz

F2 - Processing parameters  
 SI 32768  
 SF 299.5700032 MHz  
 WDW EM  
 SSB 0  
 LB 0.30 Hz  
 GB 0  
 PC 1.00

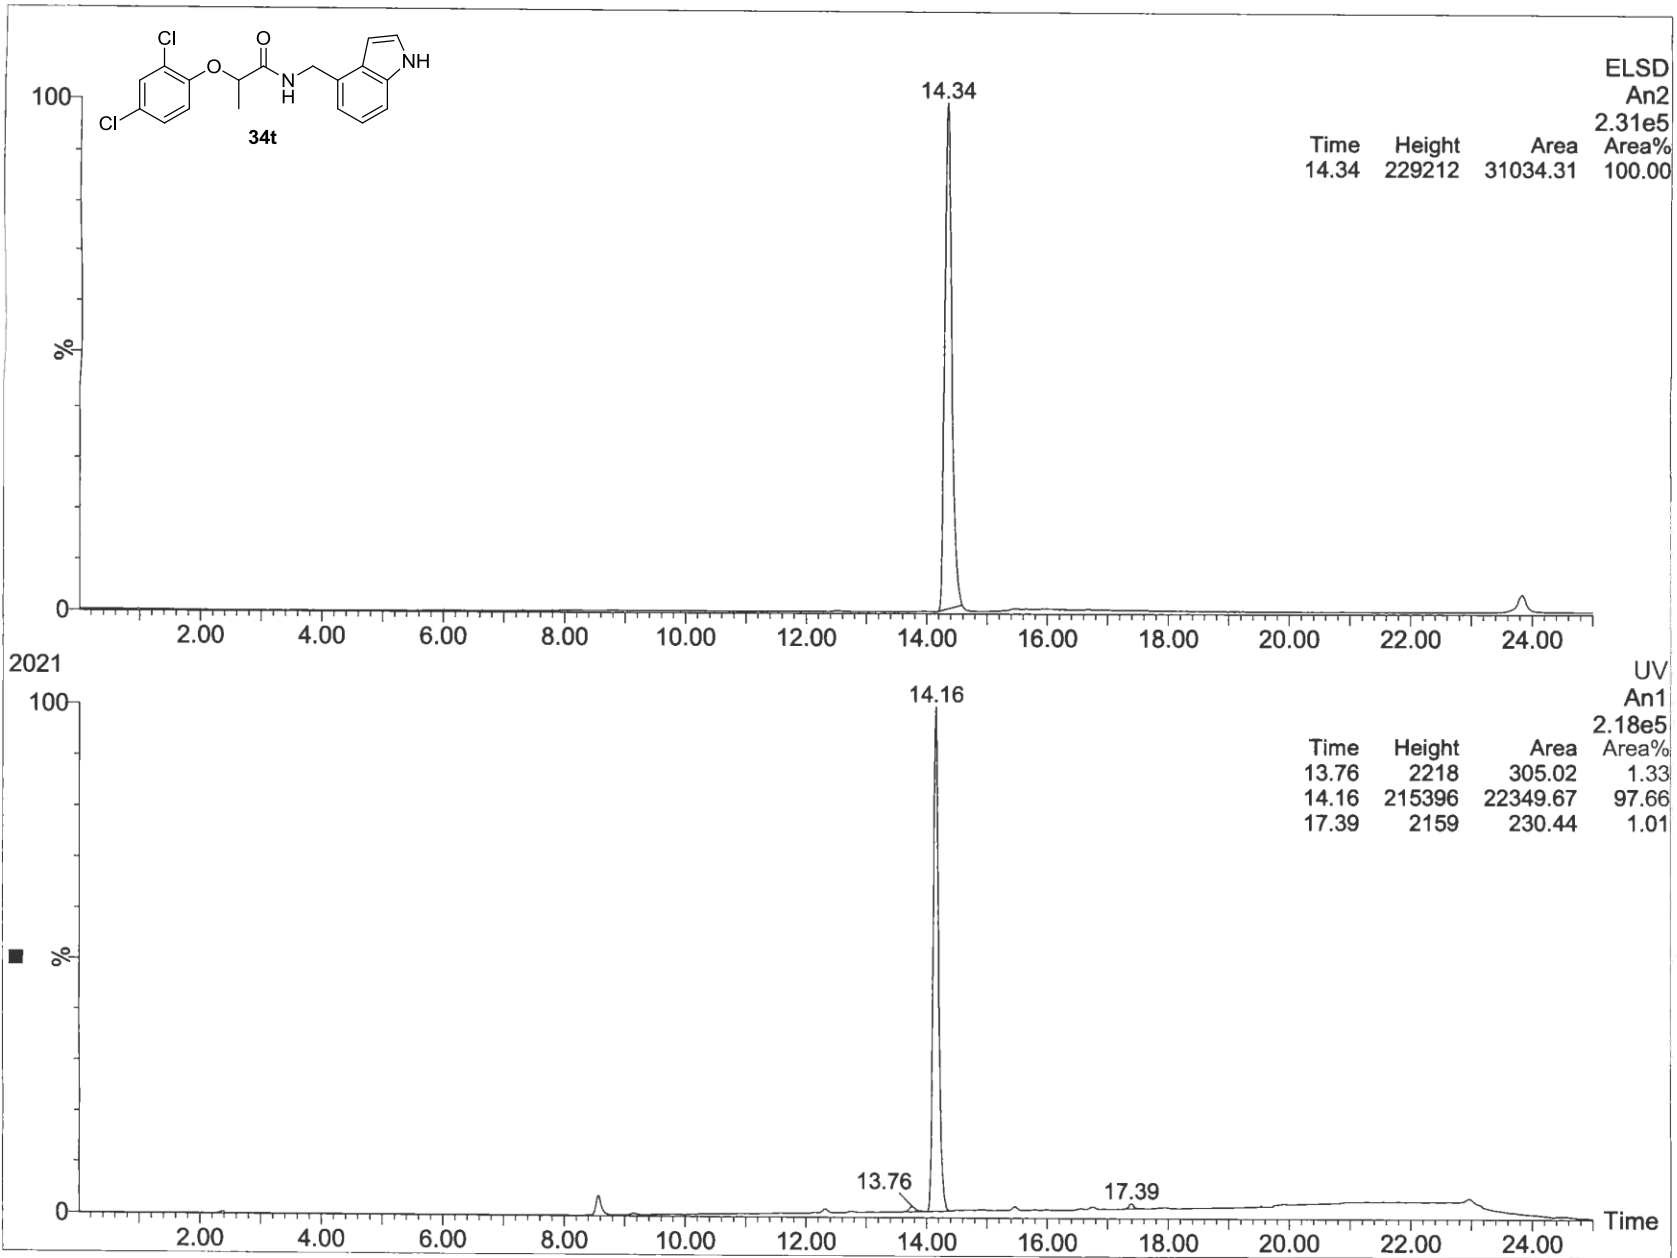

1: Scan ES+  
1.05e8

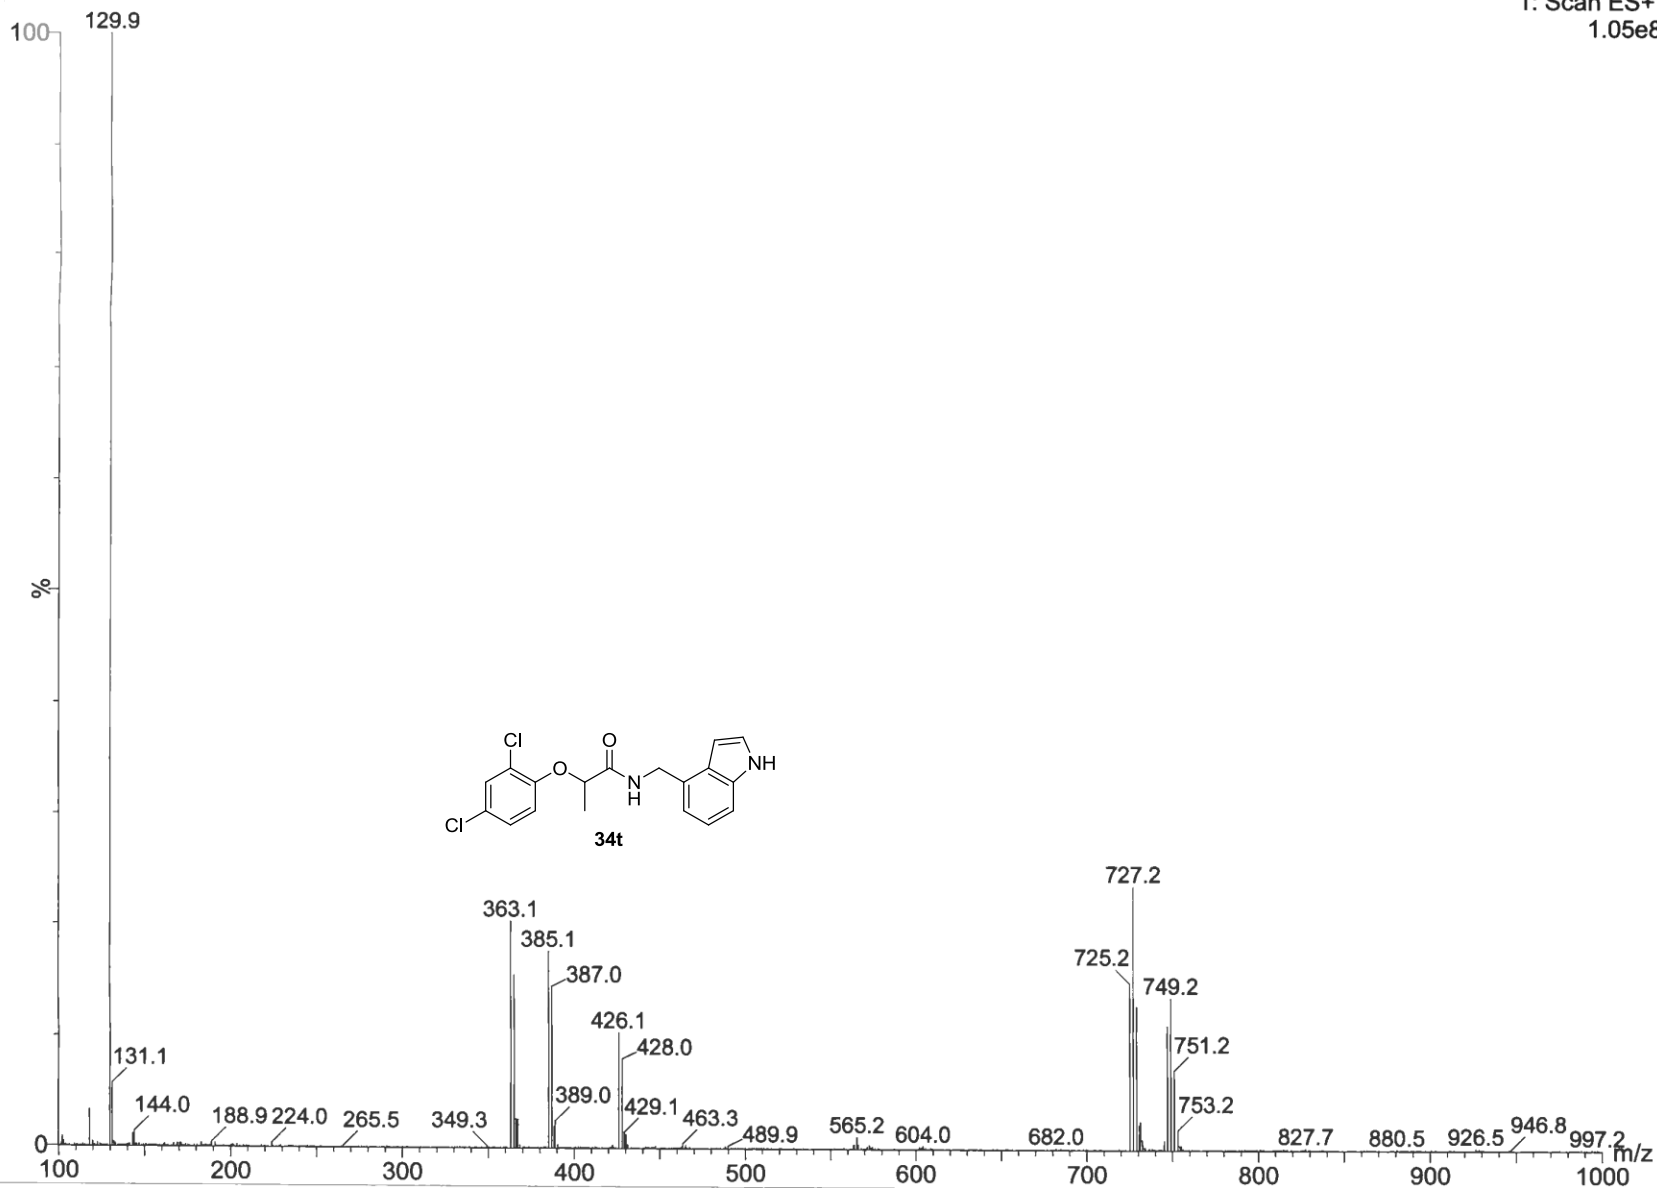

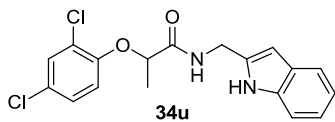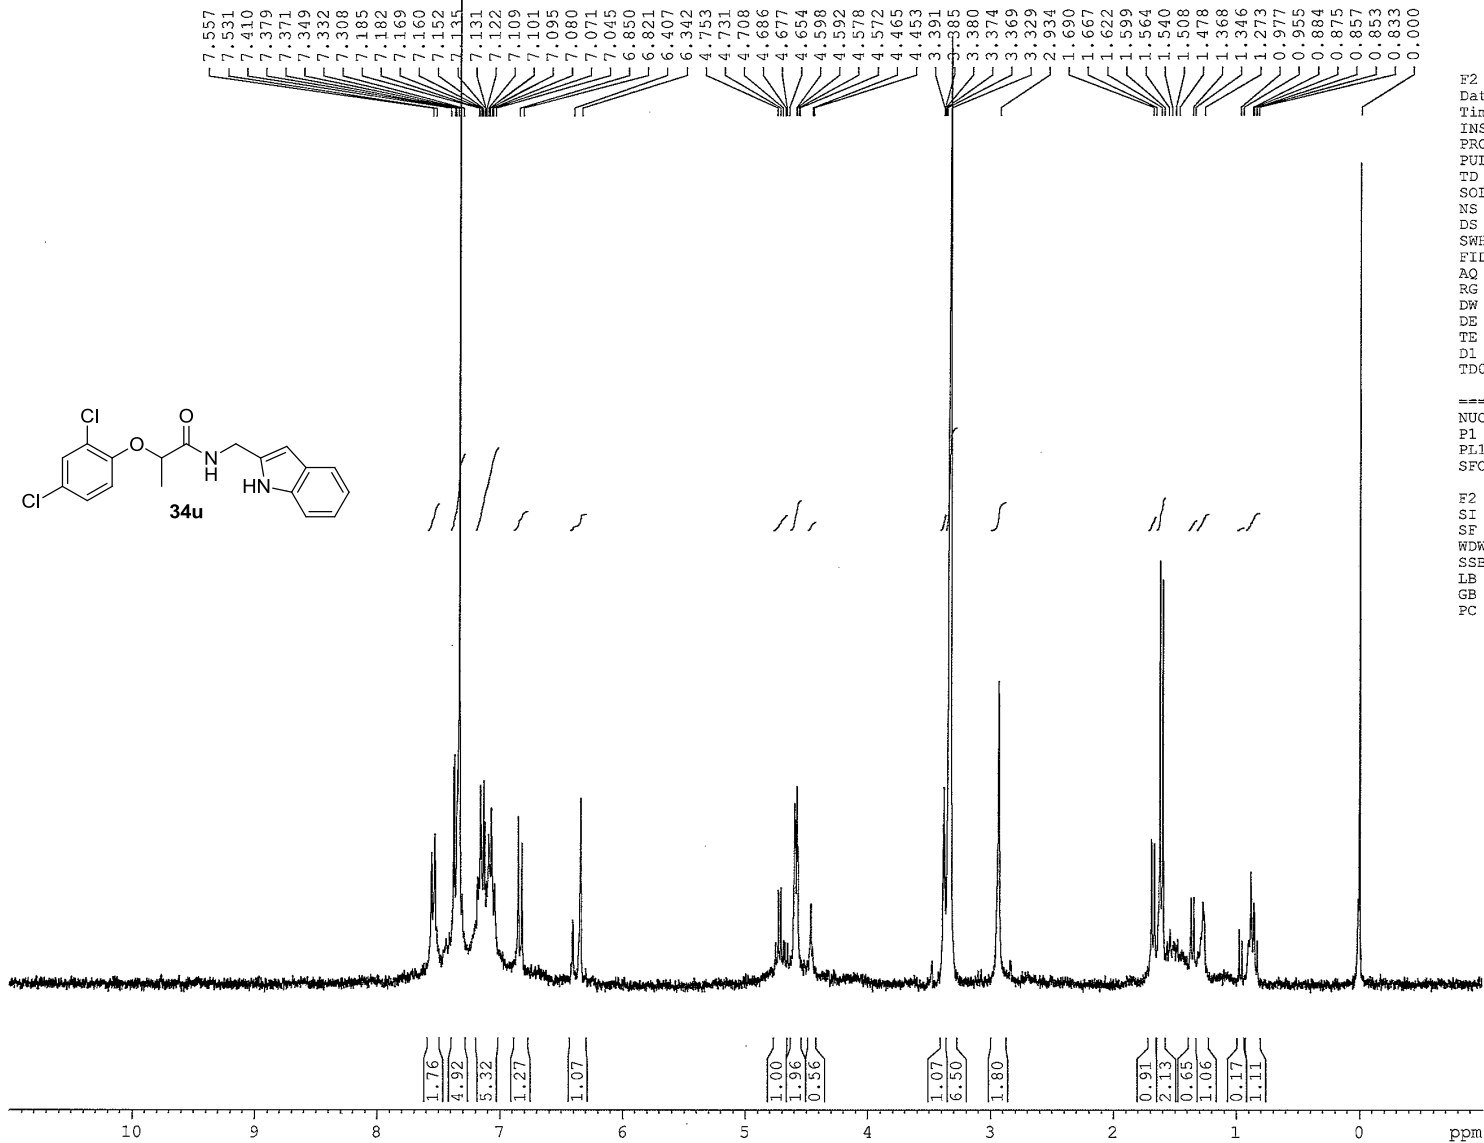

F2 - Acquisition Parameters  
 Date\_ 20120123  
 Time 11.30  
 INSTRUM spect  
 PROBHD 5 mm BBO BB-1H  
 PULPROG zg30  
 TD 65536  
 SOLVENT CDCl3  
 NS 16  
 DS 2  
 SWH 6172.839 Hz  
 FIDRES 0.094190 Hz  
 AQ 5.3084660 sec  
 RG 2896.3  
 DW 81.000 usec  
 DE 6.50 usec  
 TE 298.2 K  
 D1 1.00000000 sec  
 TDO 1

===== CHANNEL f1 =====  
 NUC1 1H  
 P1 10.00 usec  
 PL1 9.20 dB  
 SFO1 299.5018495 MHz

F2 - Processing parameters  
 SI 32768  
 SF 299.4999839 MHz  
 WDW EM  
 SSB 0  
 LB 0.30 Hz  
 GB 0  
 PC 1.00

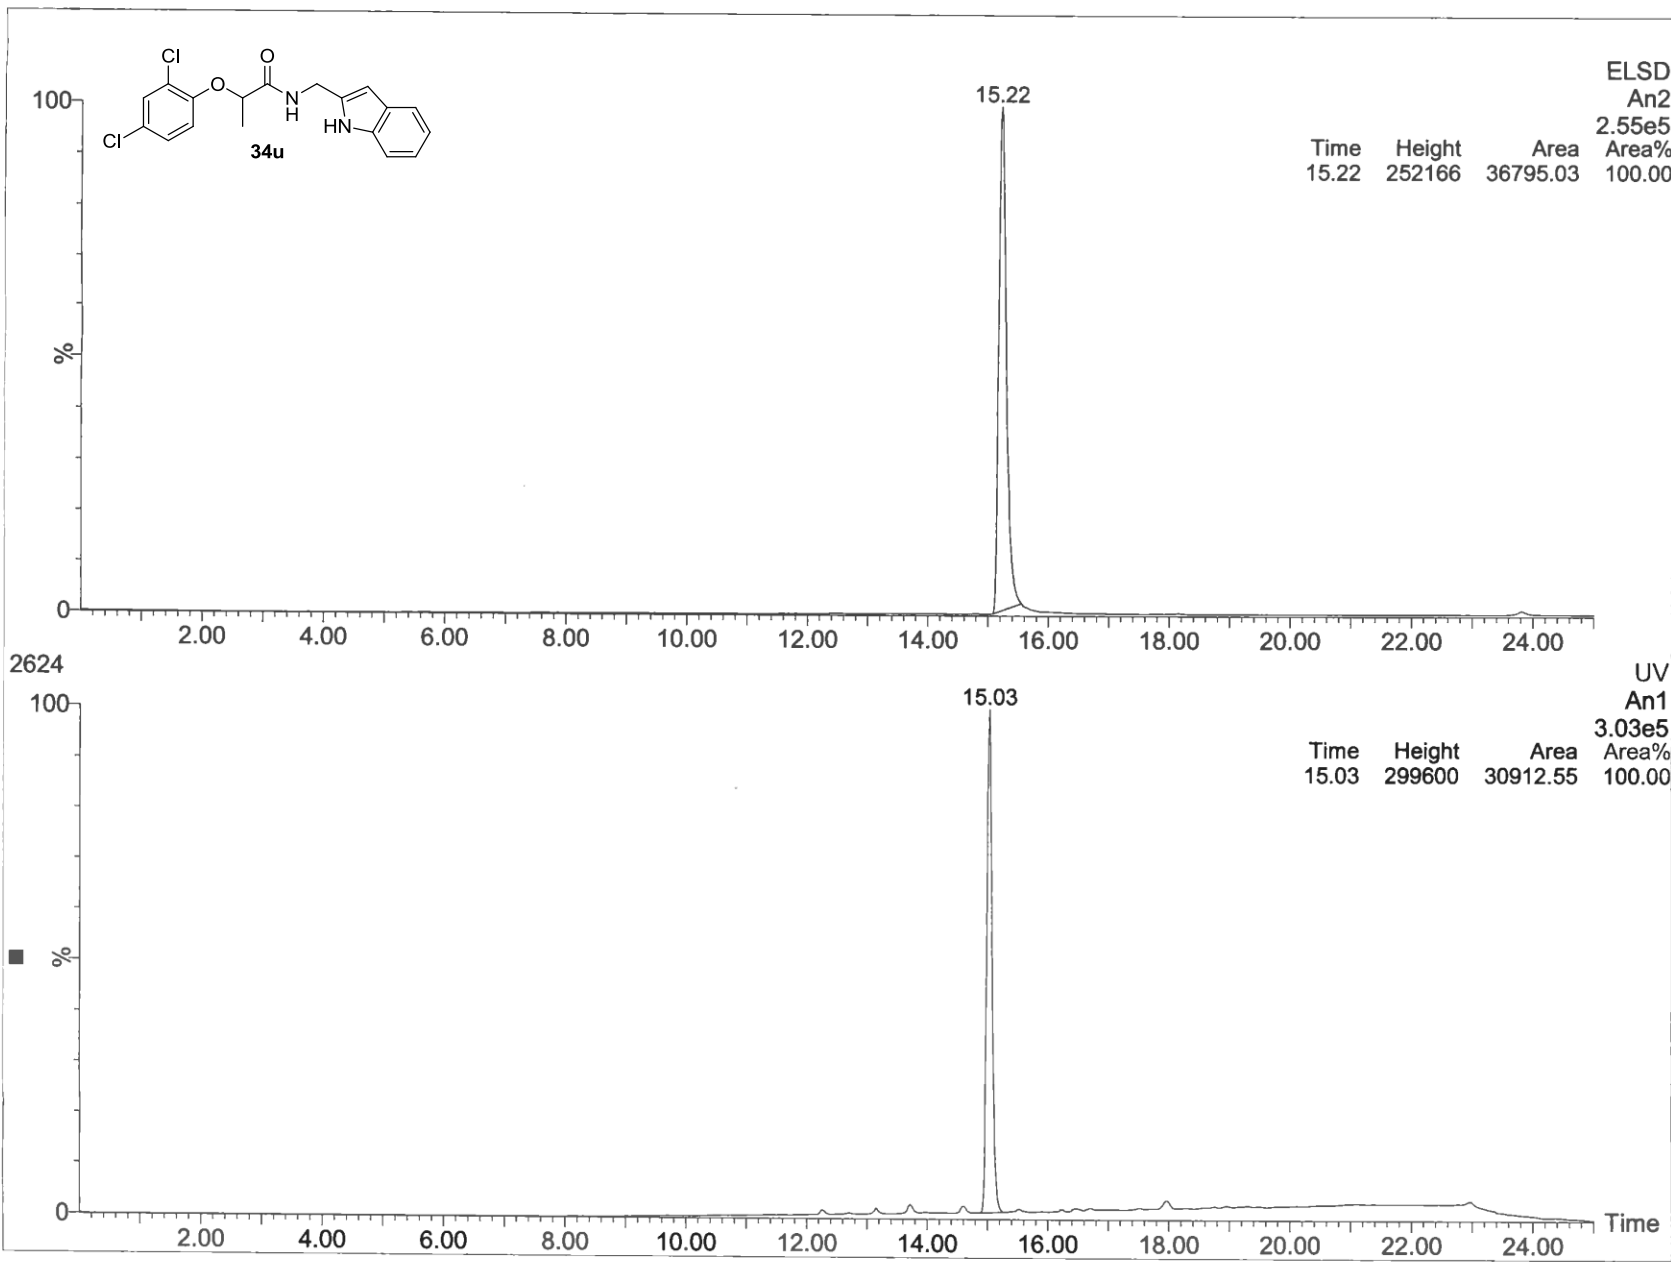

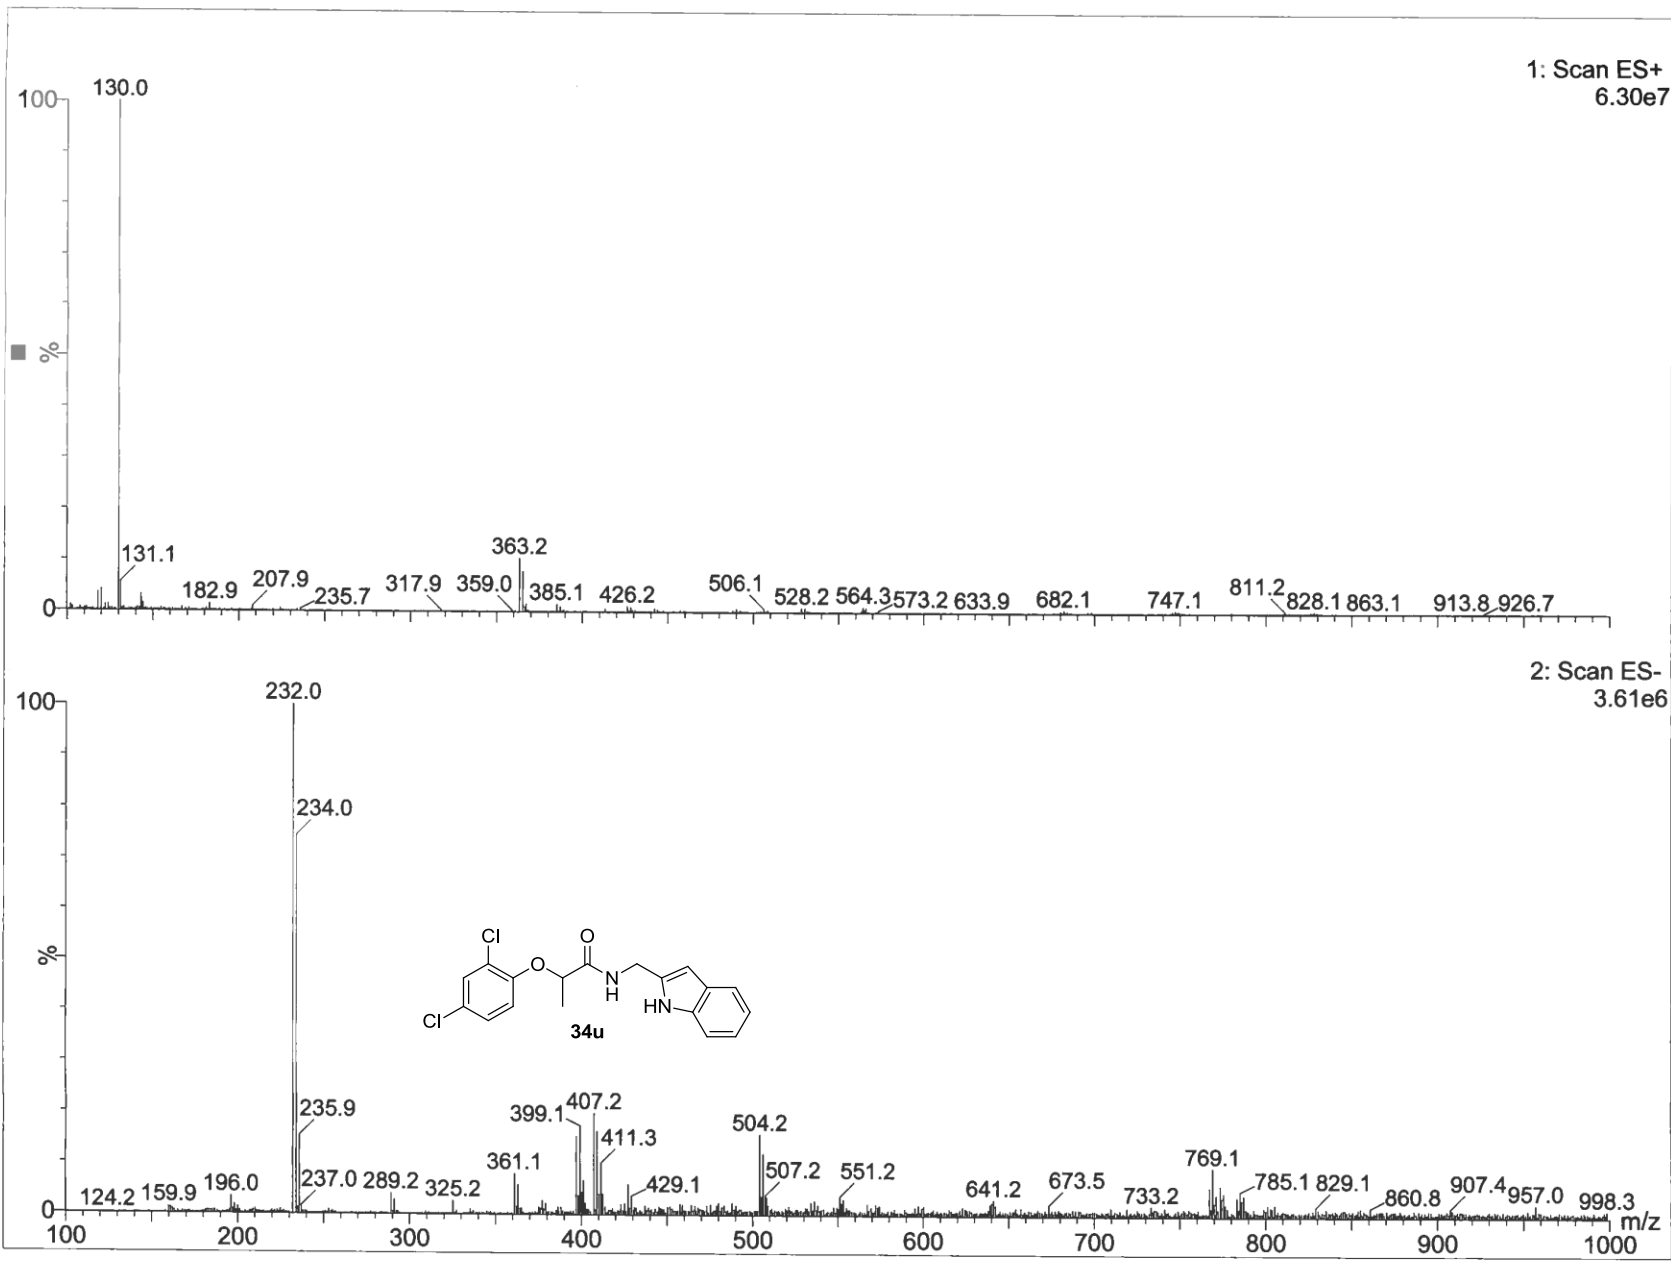

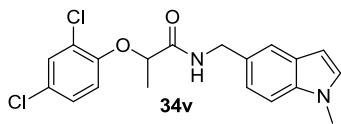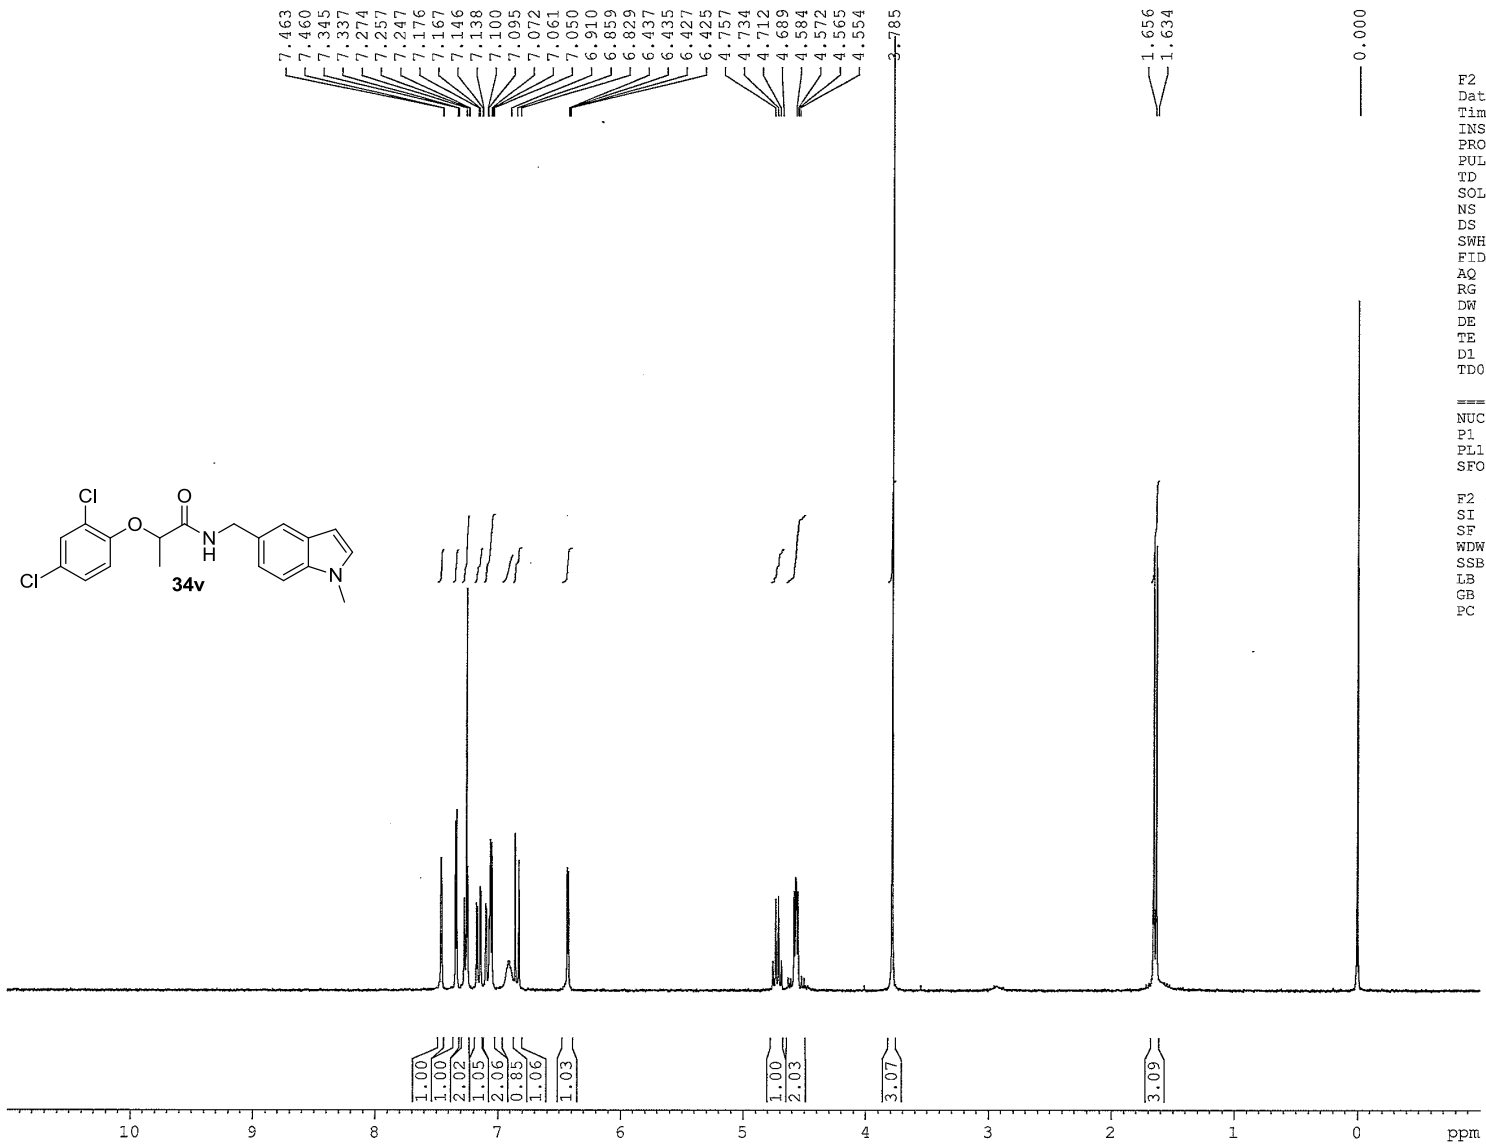

F2 - Acquisition Parameters  
 Date\_ 20111114  
 Time 10.58  
 INSTRUM spect  
 PROBHD 5 mm BBO BB-1H  
 PULPROG zg30  
 TD 65536  
 SOLVENT CDCl3  
 NS 16  
 DS 2  
 SNH 6172.839 Hz  
 FIDRES 0.094190 Hz  
 AQ 5.3084660 sec  
 RG 2298.8  
 DW 81.000 usec  
 DE 6.50 usec  
 TE 298.2 K  
 D1 1.00000000 sec  
 TDO 1

----- CHANNEL f1 -----  
 NUC1 1H  
 P1 10.00 usec  
 PL1 9.20 dB  
 SFO1 299.5018495 MHz

F2 - Processing parameters  
 SI 32768  
 SF 299.5000067 MHz  
 WDW EM  
 SSB 0  
 LB 0.30 Hz  
 GB 0  
 PC 1.00



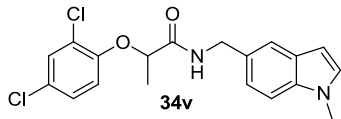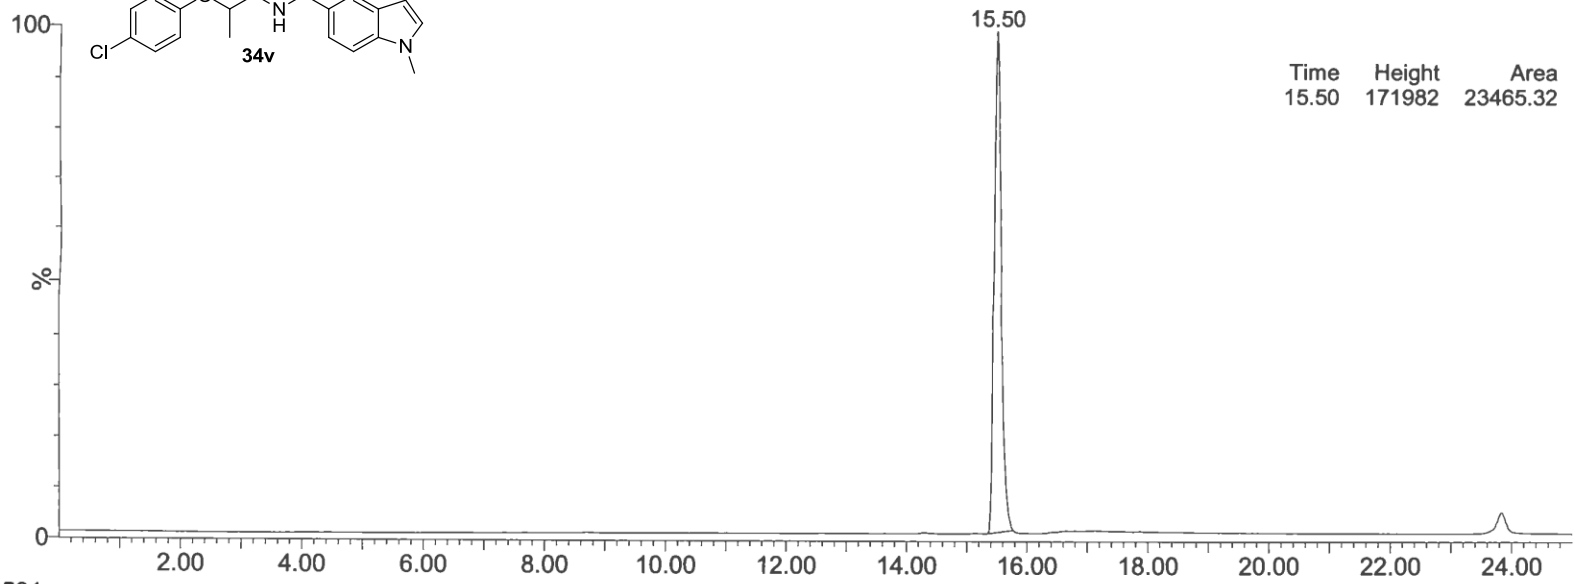

ELSD  
An2  
1.75e5

| Time  | Height | Area     | Area%  |
|-------|--------|----------|--------|
| 15.50 | 171982 | 23465.32 | 100.00 |

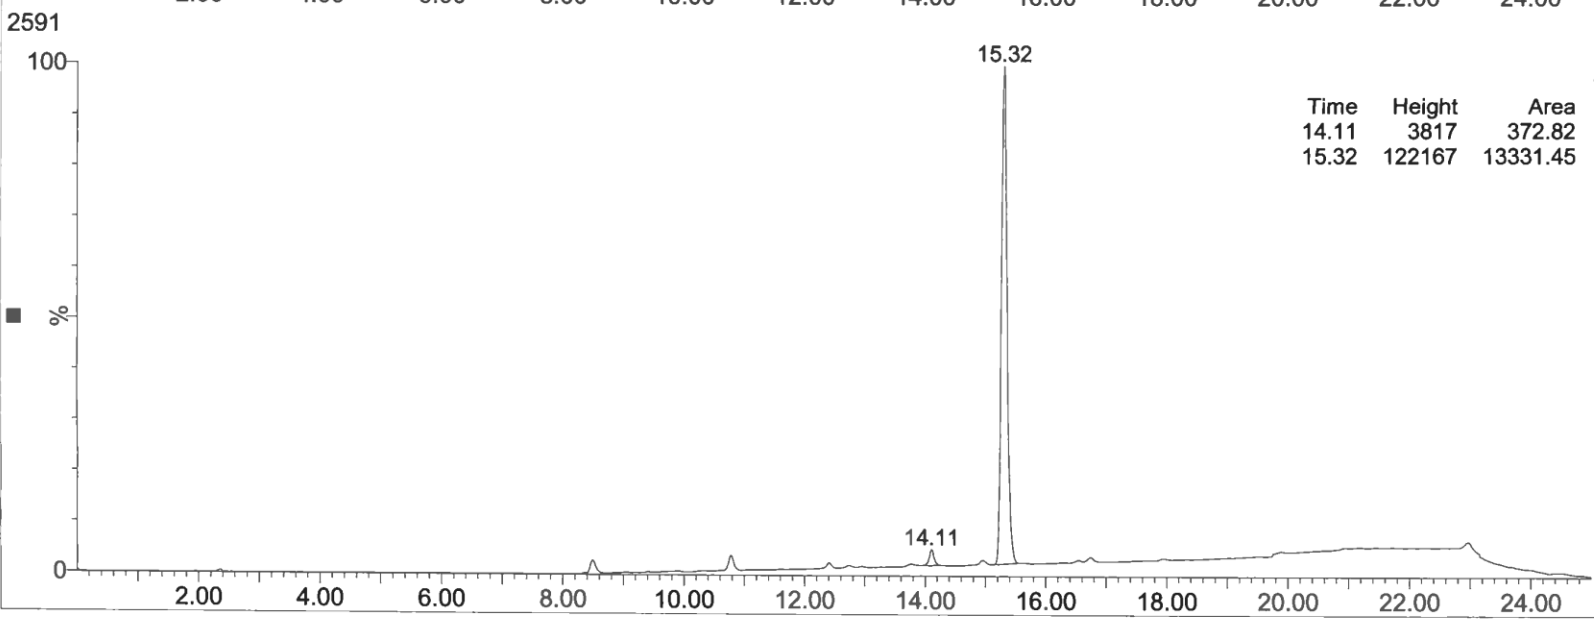

UV  
An1  
1.25e5

| Time  | Height | Area     | Area% |
|-------|--------|----------|-------|
| 14.11 | 3817   | 372.82   | 2.72  |
| 15.32 | 122167 | 13331.45 | 97.28 |

1: Scan ES+  
1.22e8

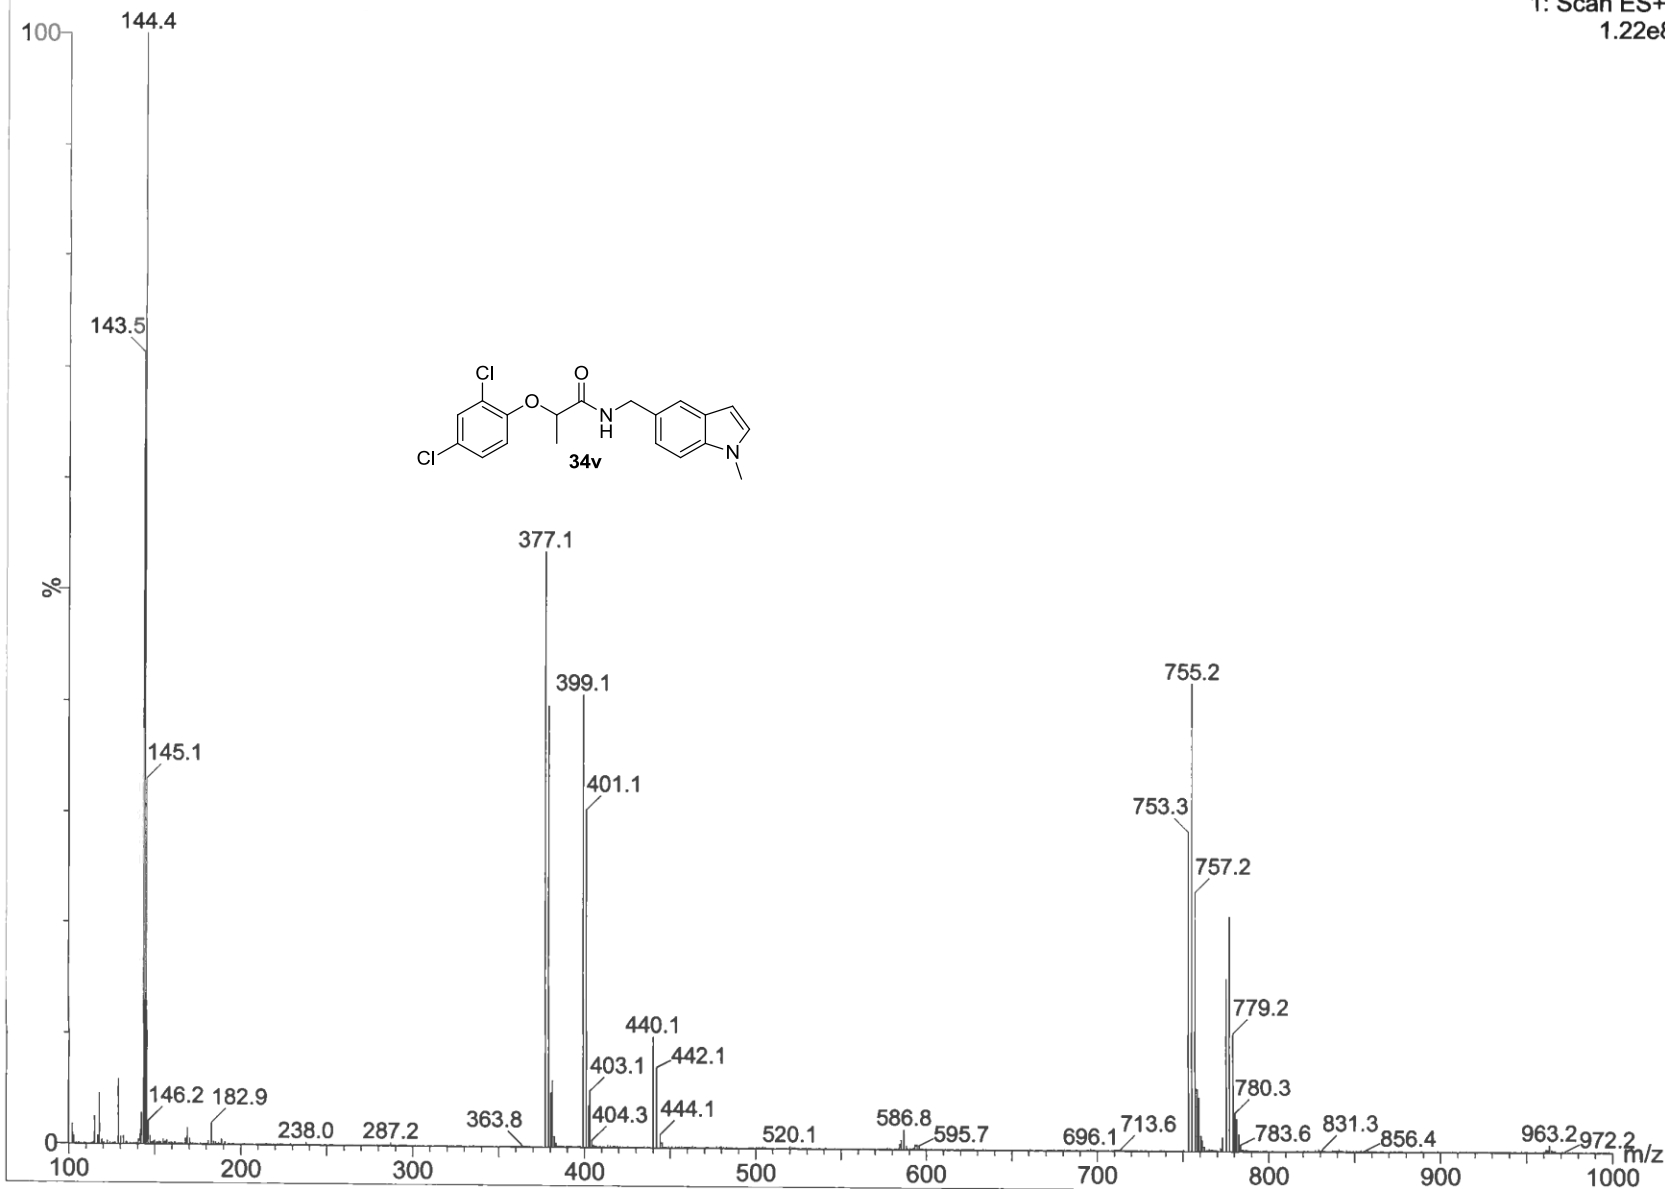

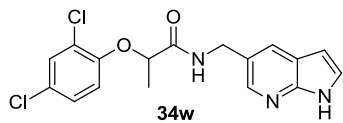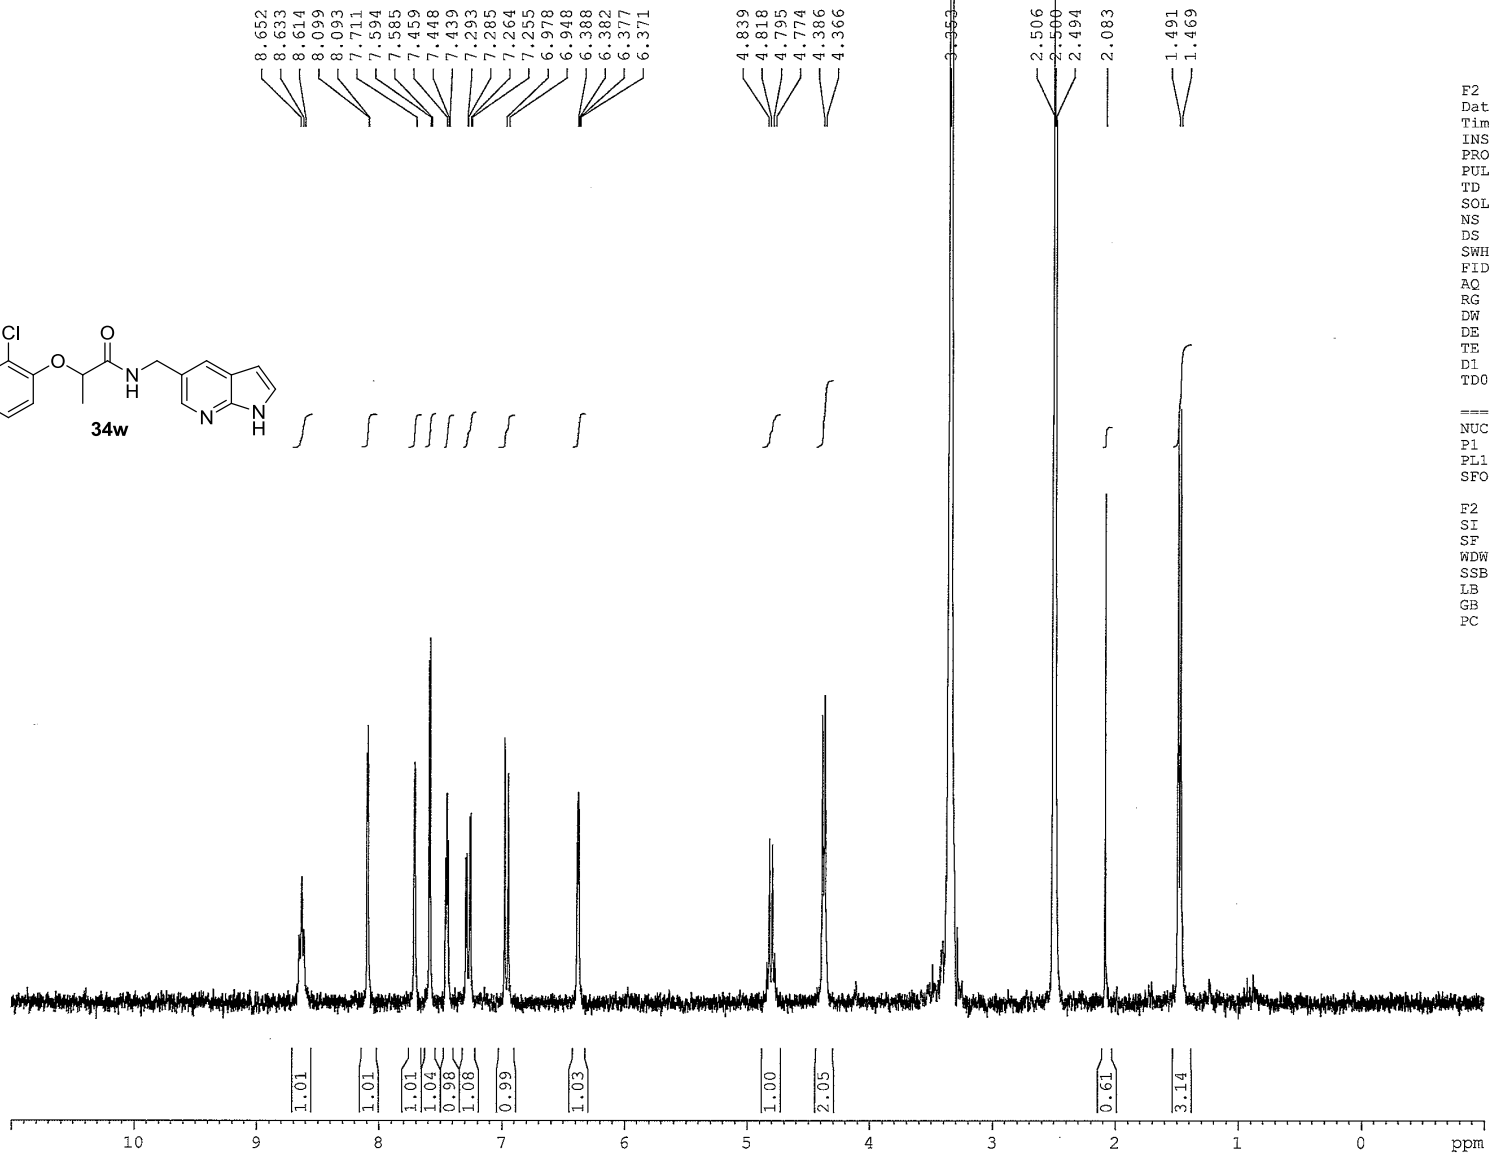

F2 - Acquisition Parameters  
 Date\_ 20120530  
 Time 12.42  
 INSTRUM spect  
 PROBHD 5 mm BBO BB-1H  
 PULPROG zg30  
 TD 65536  
 SOLVENT DMSO  
 NS 16  
 DS 2  
 SWH 6172.839 Hz  
 FIDRES 0.094190 Hz  
 AQ 5.3084660 sec  
 RG 3251  
 DW 81.000 usec  
 DE 6.50 usec  
 TE 295.1 K  
 D1 1.0000000 sec  
 TD0 1

===== CHANNEL f1 =====  
 NUC1 1H  
 P1 10.00 usec  
 PL1 9.20 dB  
 SFO1 299.5018495 MHz

F2 - Processing parameters  
 SI 32768  
 SF 299.5000008 MHz  
 WDW EM  
 SSB 0  
 LB 0.30 Hz  
 GB 0  
 PC 1.00

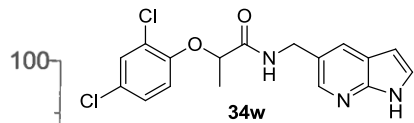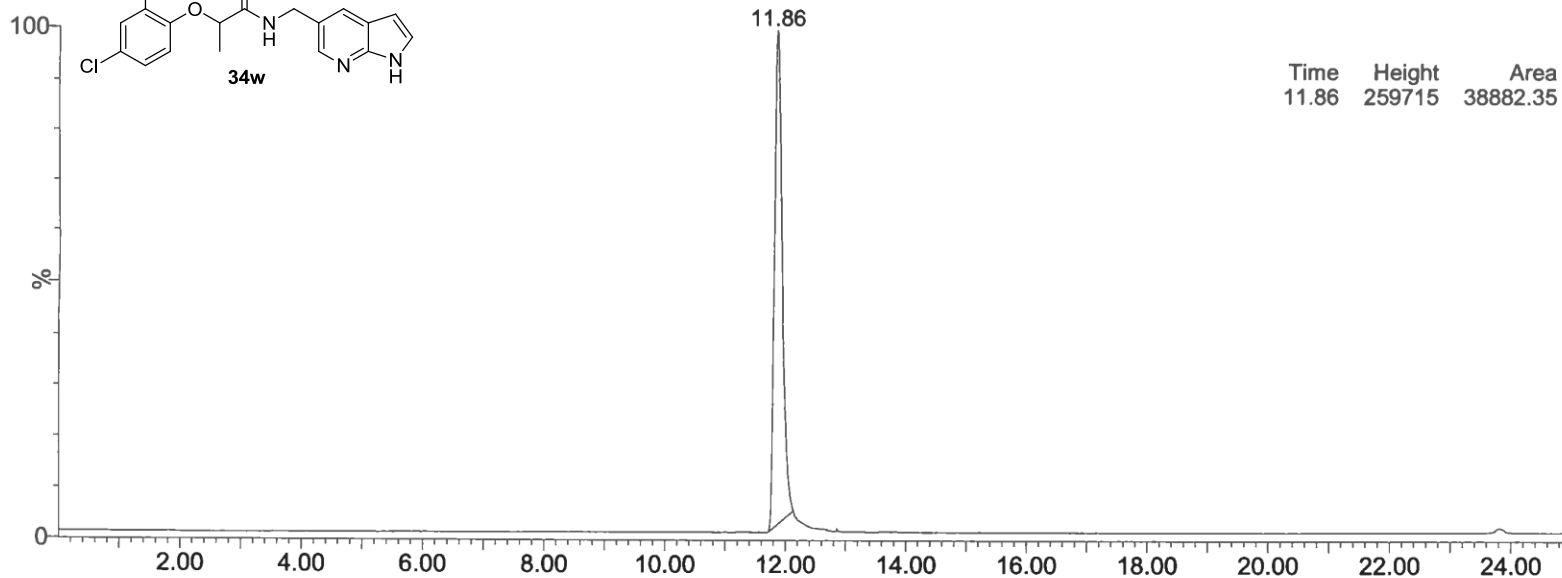

ELSD  
An2  
2.68e5

| Time  | Height | Area     | Area%  |
|-------|--------|----------|--------|
| 11.86 | 259715 | 38882.35 | 100.00 |

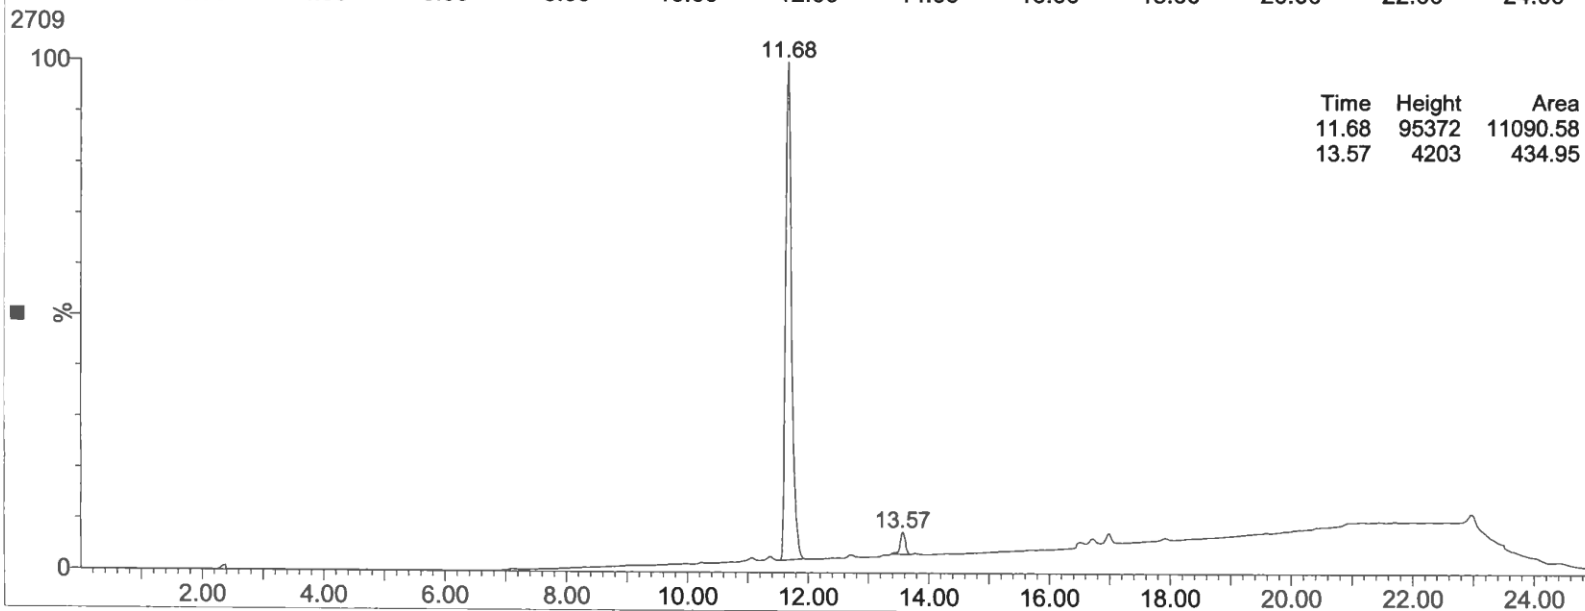

UV  
An1  
9.77e4

| Time  | Height | Area     | Area% |
|-------|--------|----------|-------|
| 11.68 | 95372  | 11090.58 | 96.23 |
| 13.57 | 4203   | 434.95   | 3.77  |

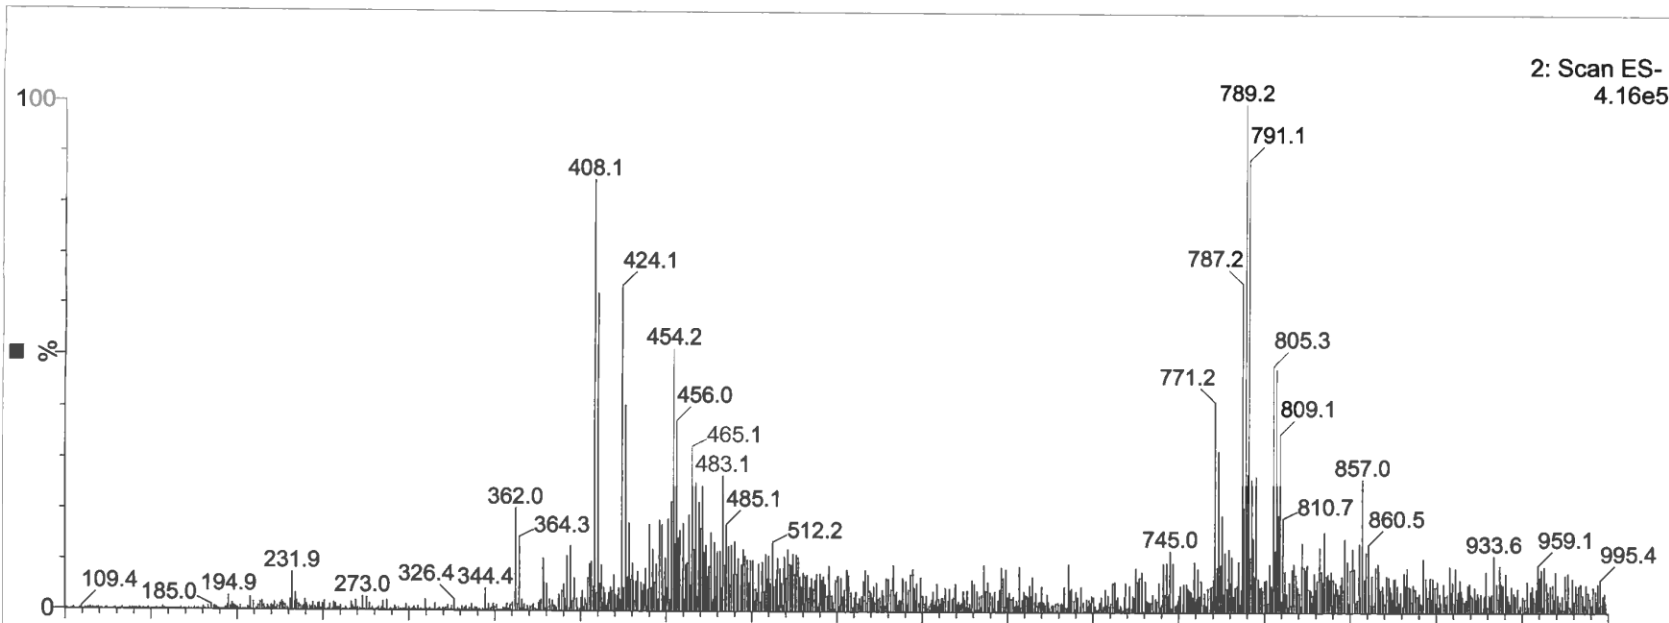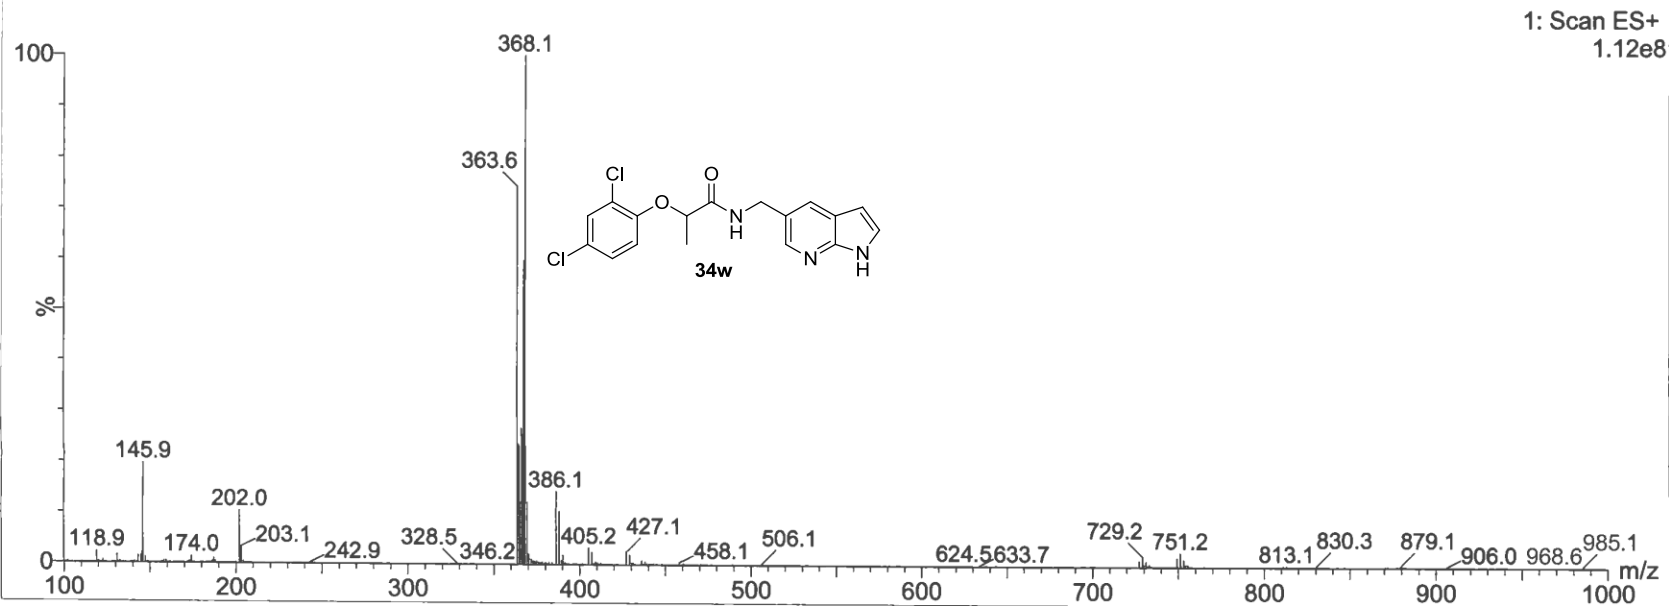

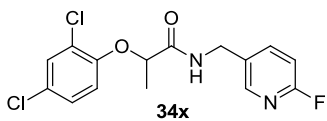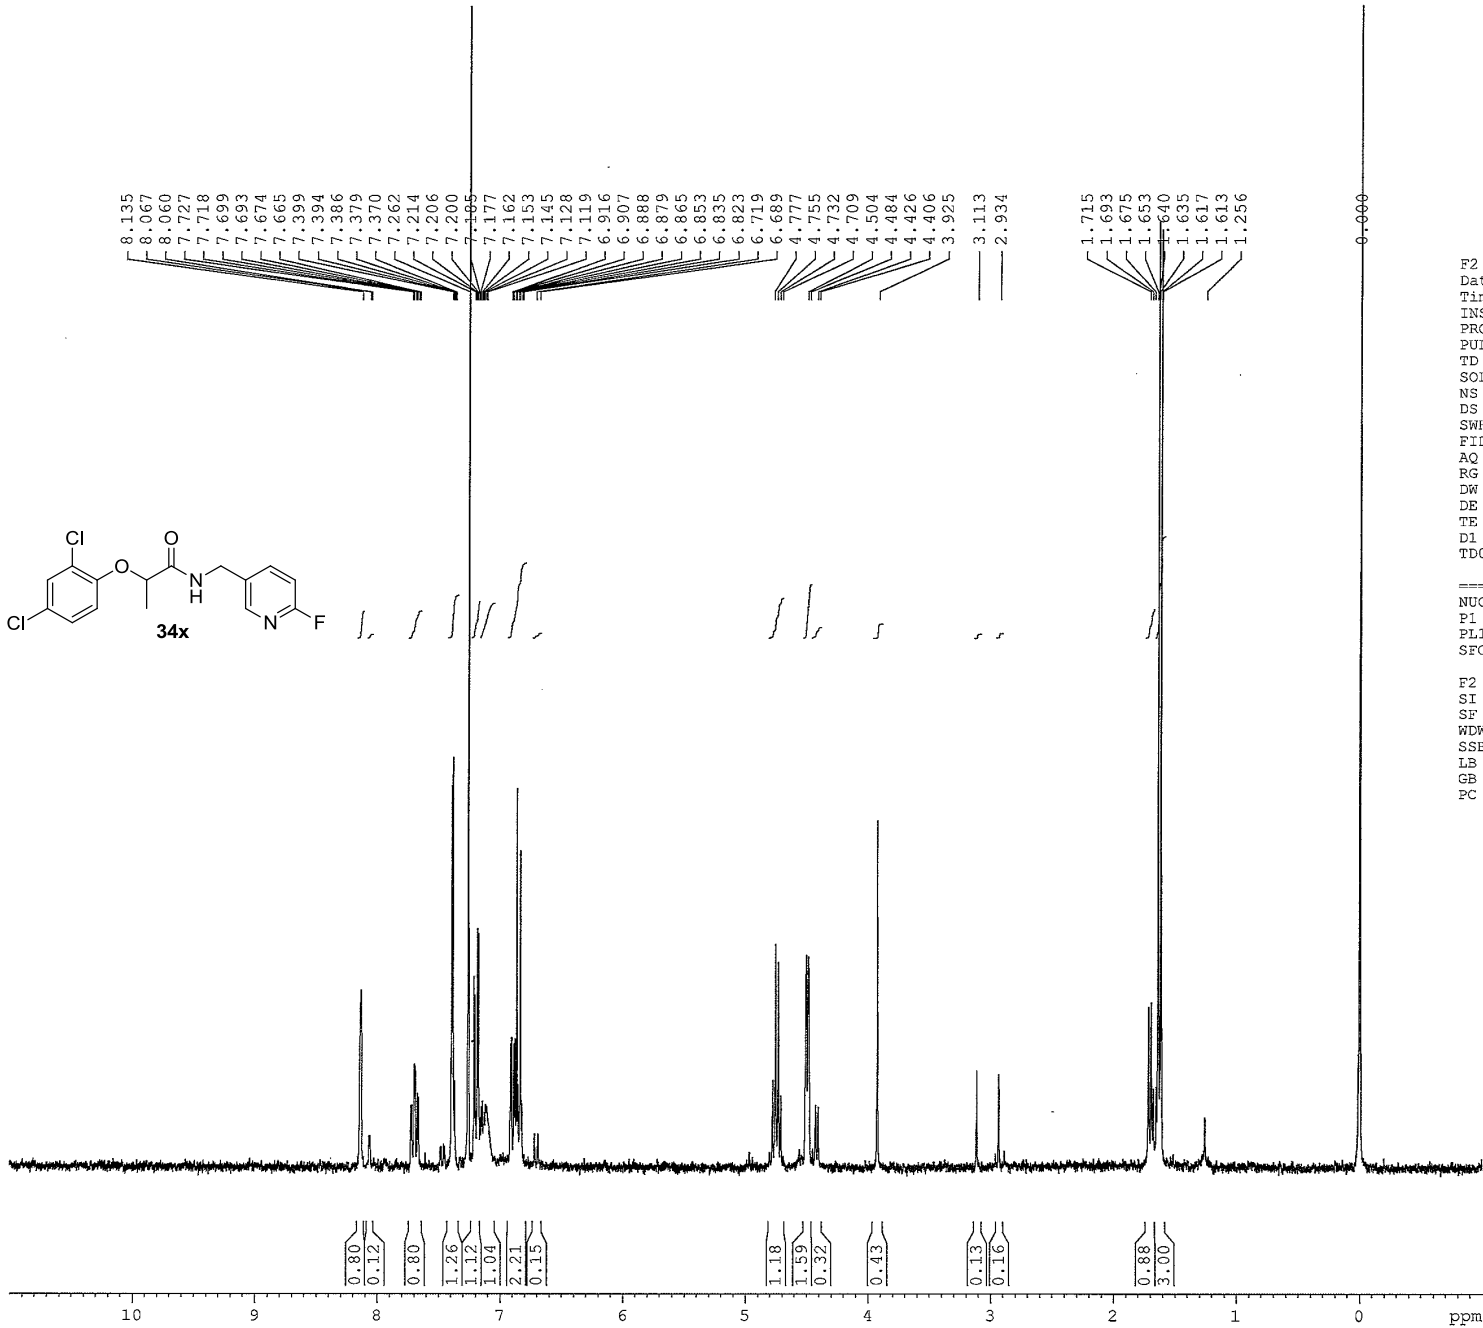

8.135  
8.067  
8.060  
7.727  
7.718  
7.699  
7.693  
7.674  
7.665  
7.399  
7.394  
7.386  
7.379  
7.370  
7.262  
7.214  
7.206  
7.200  
7.195  
7.177  
7.162  
7.153  
7.145  
7.128  
7.119  
6.916  
6.907  
6.888  
6.879  
6.865  
6.853  
6.835  
6.823  
6.719  
6.689  
4.777  
4.755  
4.732  
4.709  
4.504  
4.484  
4.426  
4.406  
3.925  
3.113  
2.934  
1.715  
1.693  
1.675  
1.653  
1.640  
1.635  
1.617  
1.613  
1.256  
0.660

F2 - Acquisition Parameters  
 Date\_ 20120321  
 Time 11.22  
 INSTRUM spect  
 PROBHD 5 mm BBO BB-1H  
 PULPROG zg30  
 TD 65536  
 SOLVENT CDCl3  
 NS 16  
 DS 2  
 SWH 6172.839 Hz  
 FIDRES 0.094190 Hz  
 AQ 5.3084660 sec  
 RG 4096  
 DW 81.000 usec  
 DE 6.50 usec  
 TE 298.2 K  
 D1 1.00000000 sec  
 TDO 1

===== CHANNEL f1 =====  
 NUC1 1H  
 P1 10.00 usec  
 PL1 9.20 dB  
 SFO1 299.5018495 MHz

F2 - Processing parameters  
 SI 32768  
 SF 299.5000050 MHz  
 WDW EM  
 SSB 0  
 LB 0.30 Hz  
 GB 0  
 PC 1.00

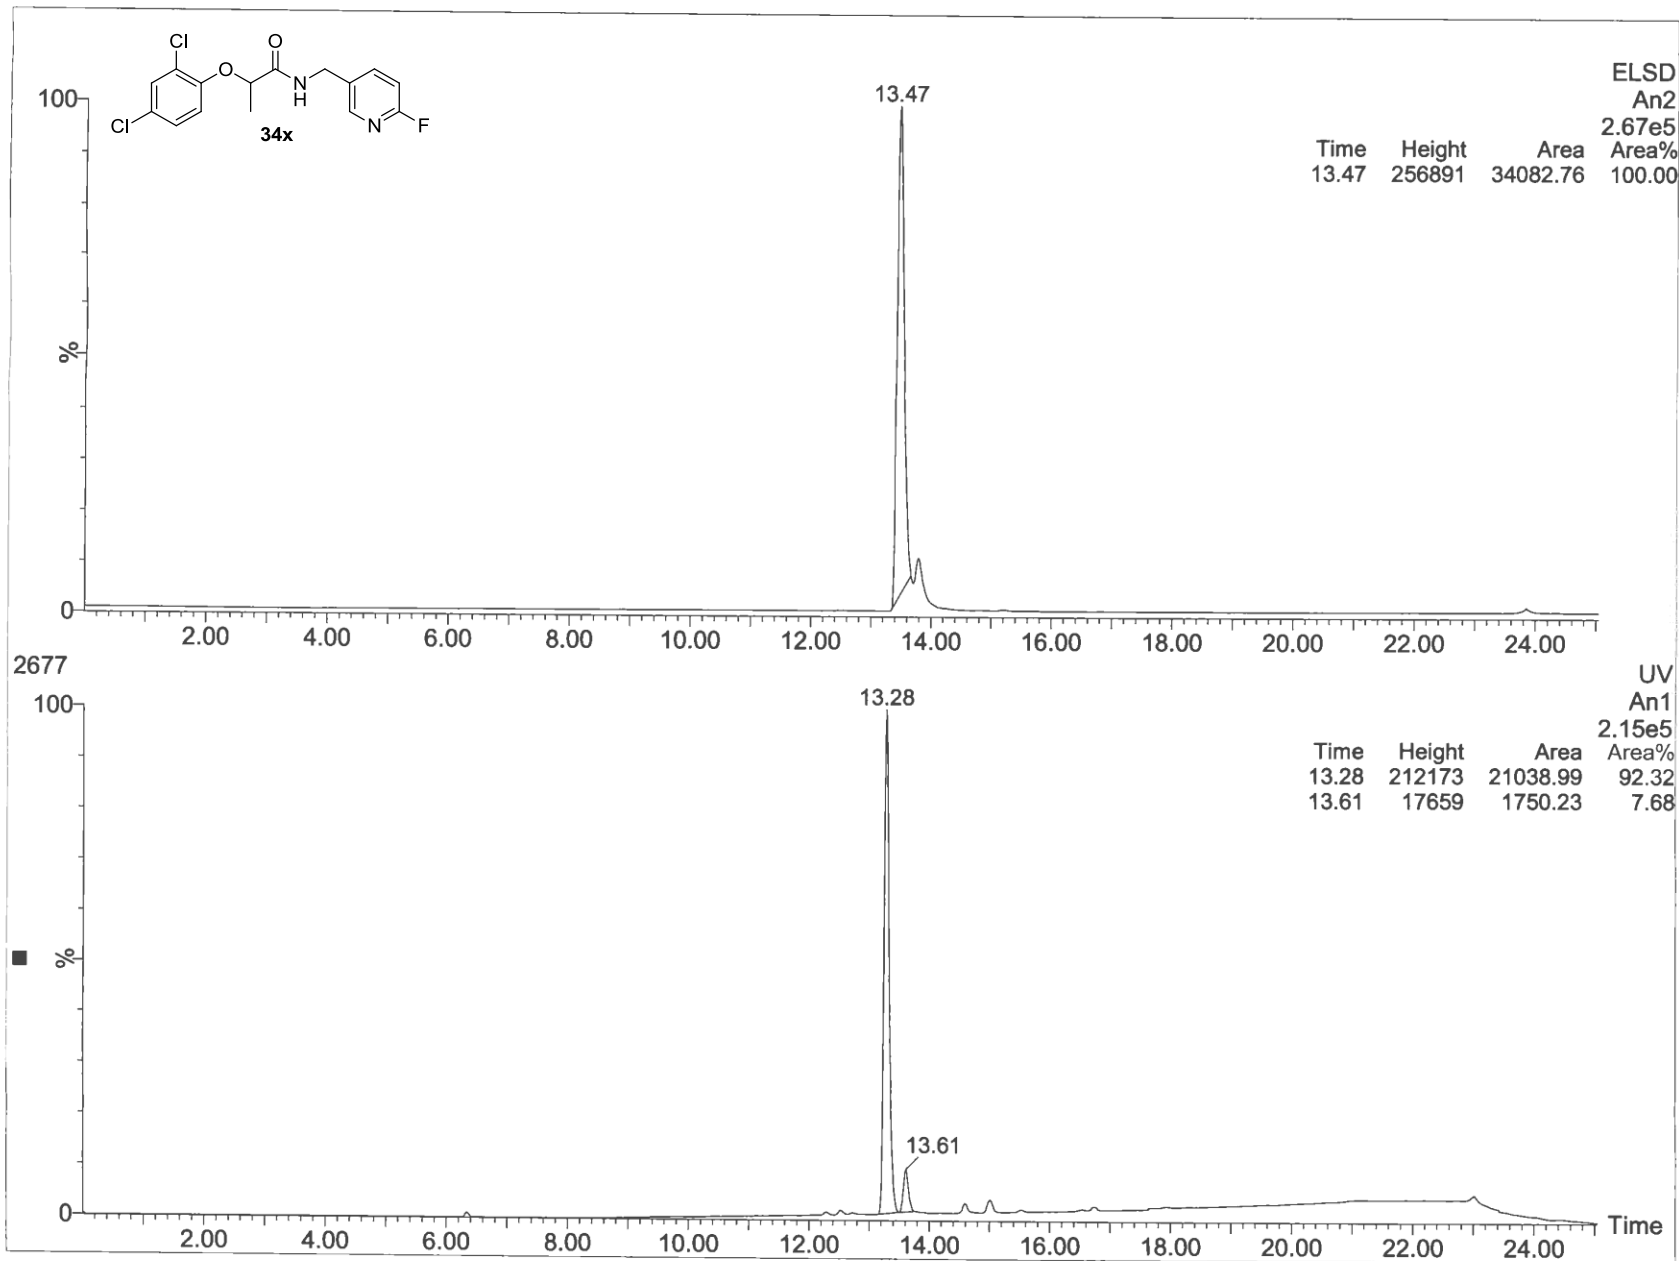

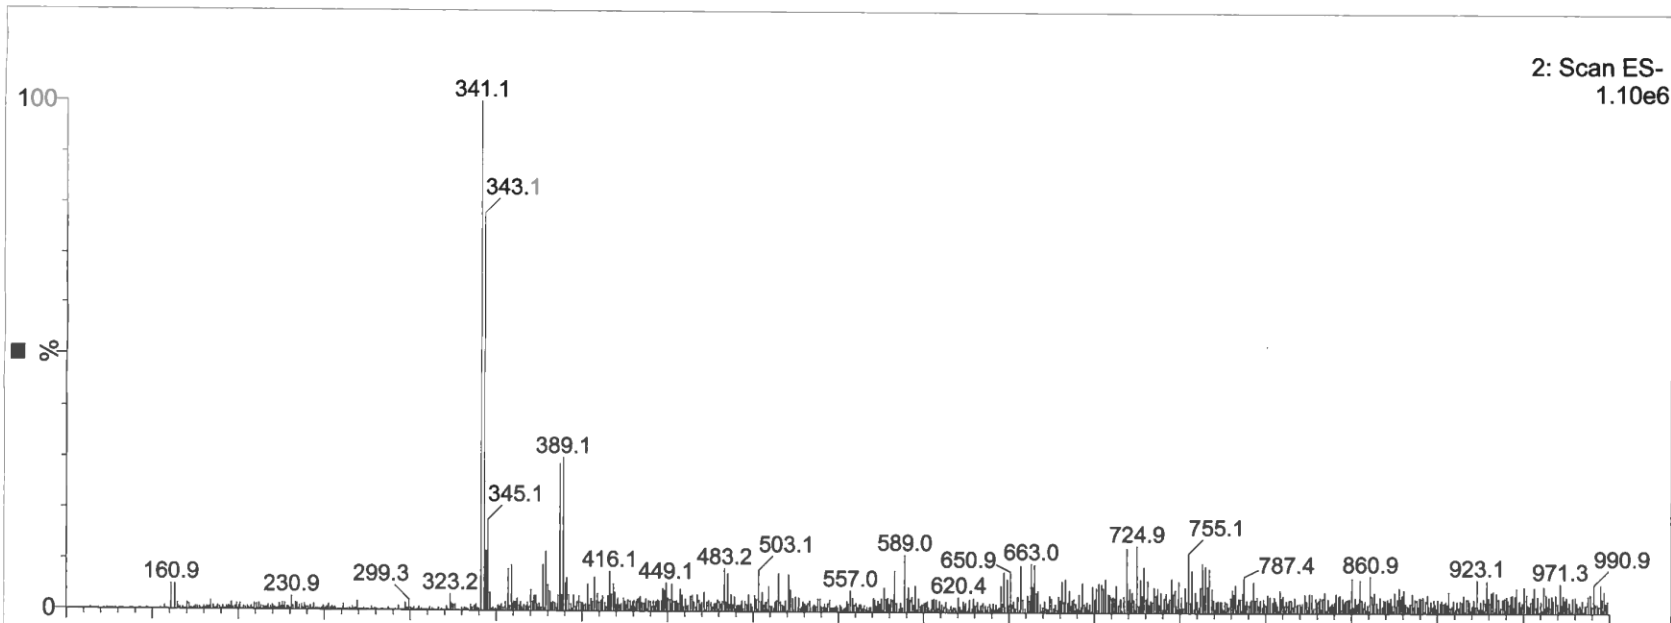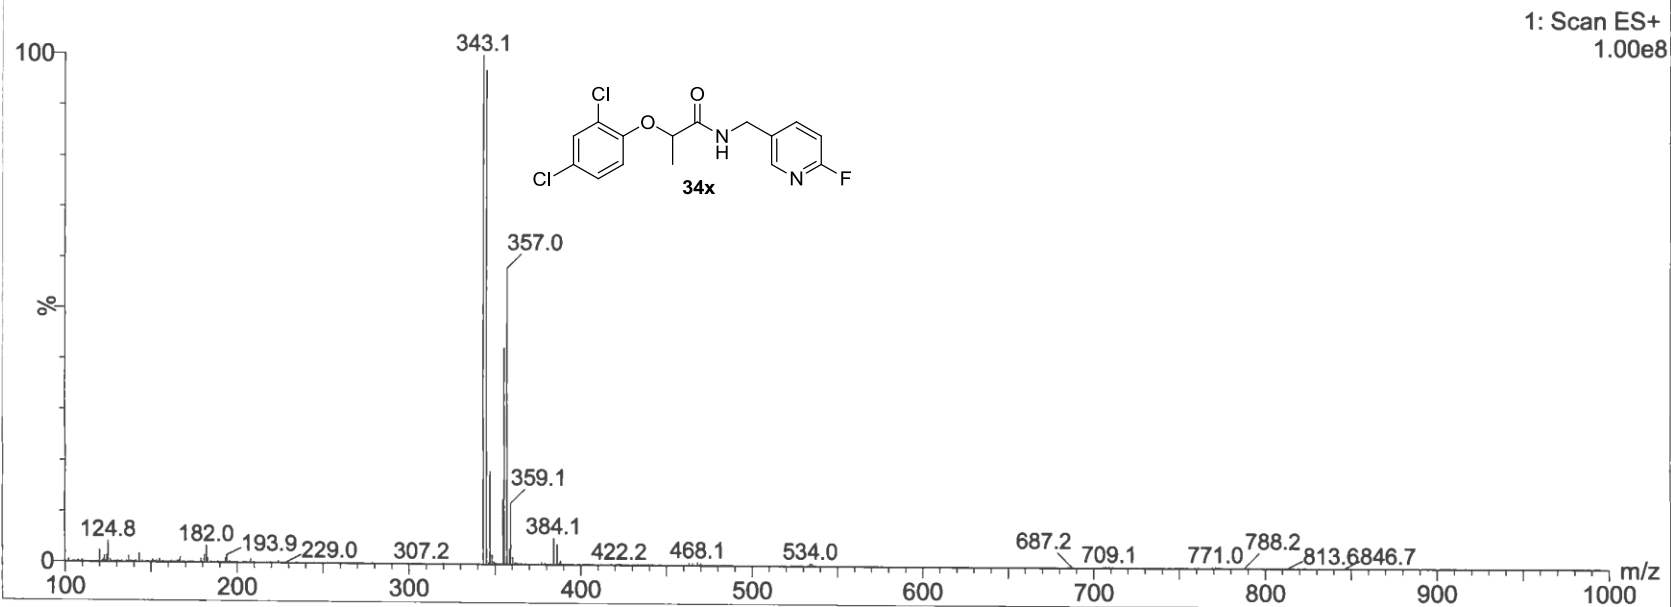



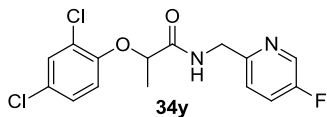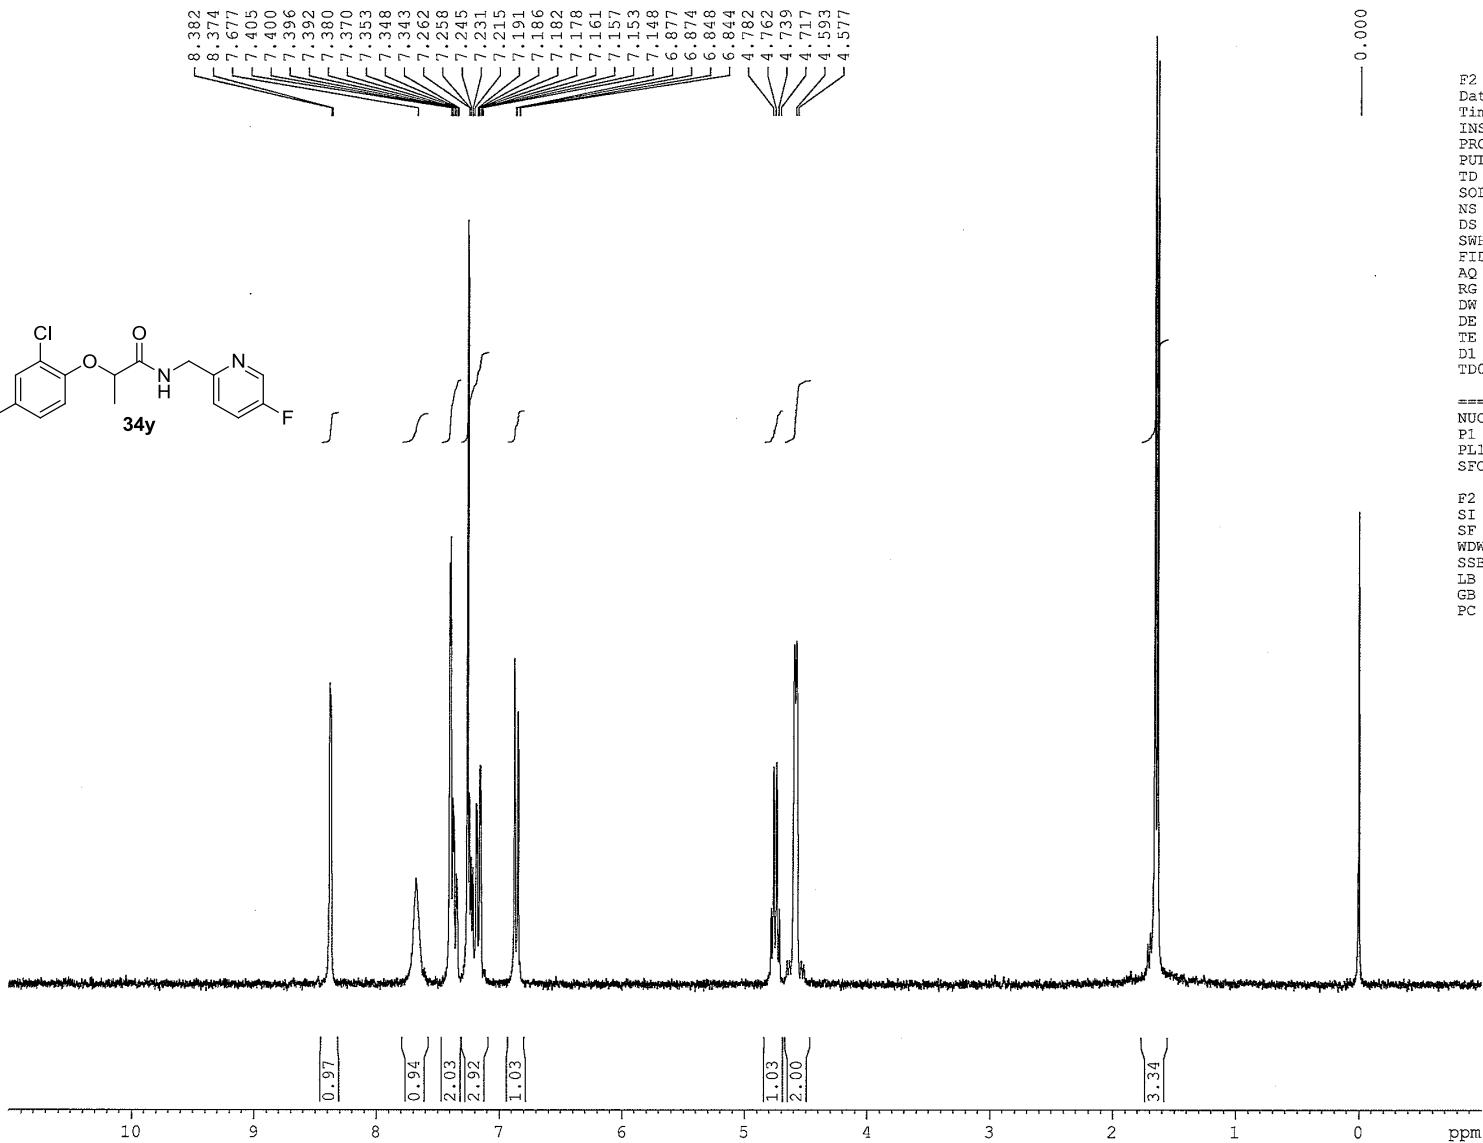

F2 - Acquisition Parameters  
 Date\_ 20120123  
 Time\_ 11.14  
 INSTRUM spect  
 PROBH4 5 mm BBO BB-1H  
 PULPROG zg30  
 TD 65536  
 SOLVENT CDCl3  
 NS 16  
 DS 2  
 SWH 6172.839 Hz  
 FIDRES 0.094190 Hz  
 AQ 5.3084660 sec  
 RG 3251  
 DW 81.000 usec  
 DE 6.50 usec  
 TE 298.2 K  
 DL 1.00000000 sec  
 TDC 1

===== CHANNEL f1 =====  
 NUC1 1H  
 P1 10.00 usec  
 PLL 9.20 dB  
 SFO1 299.5018495 MHz

F2 - Processing parameters  
 SI 32768  
 SF 299.5000056 MHz  
 WDW EM  
 SSB 0  
 LB 0.30 Hz  
 GB 0  
 PC 1.00

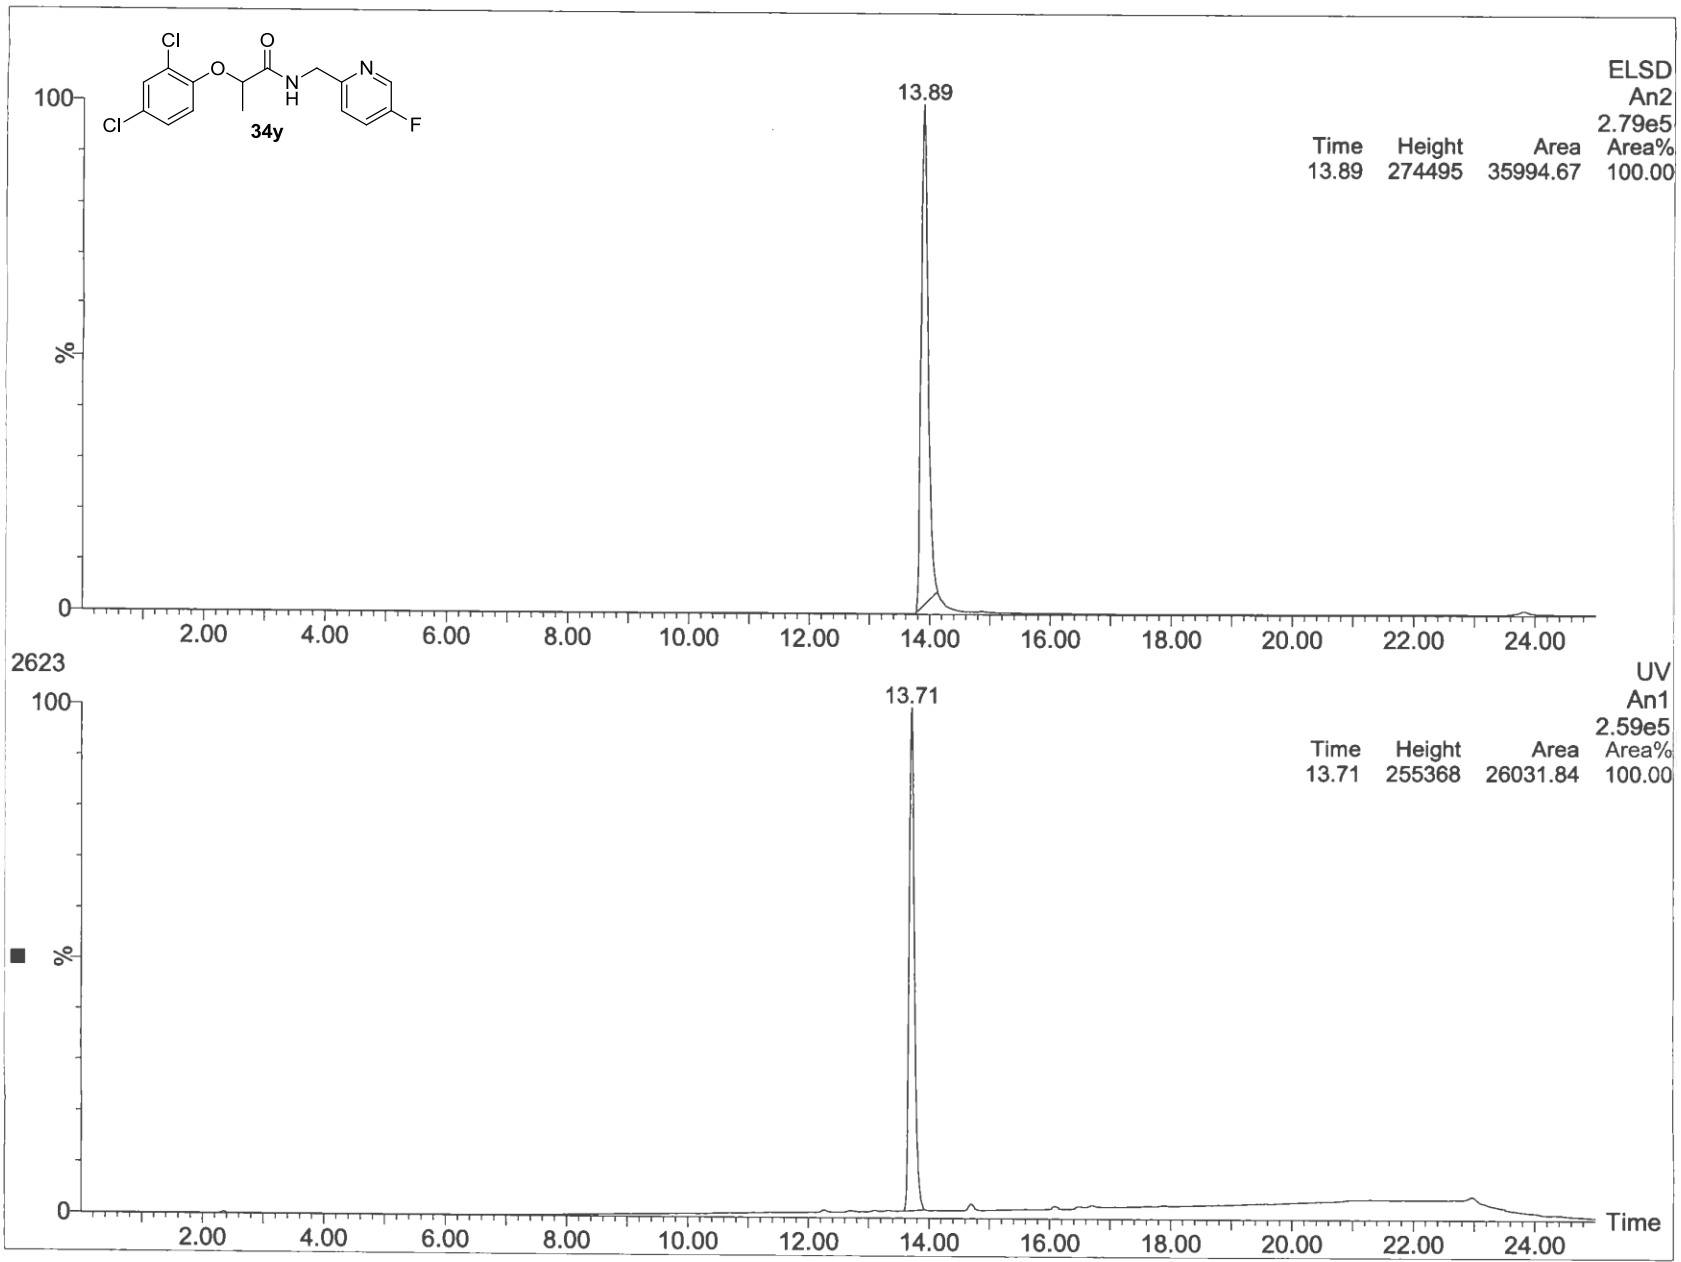

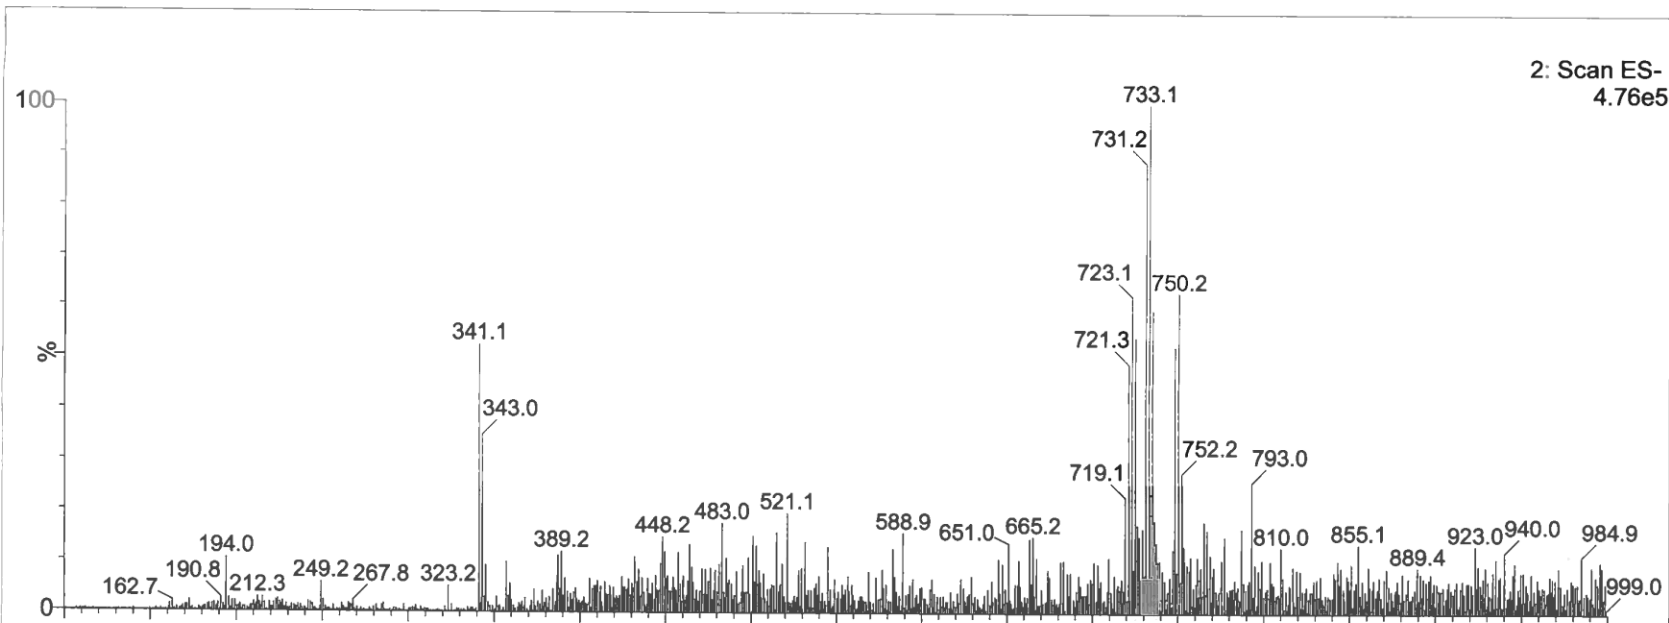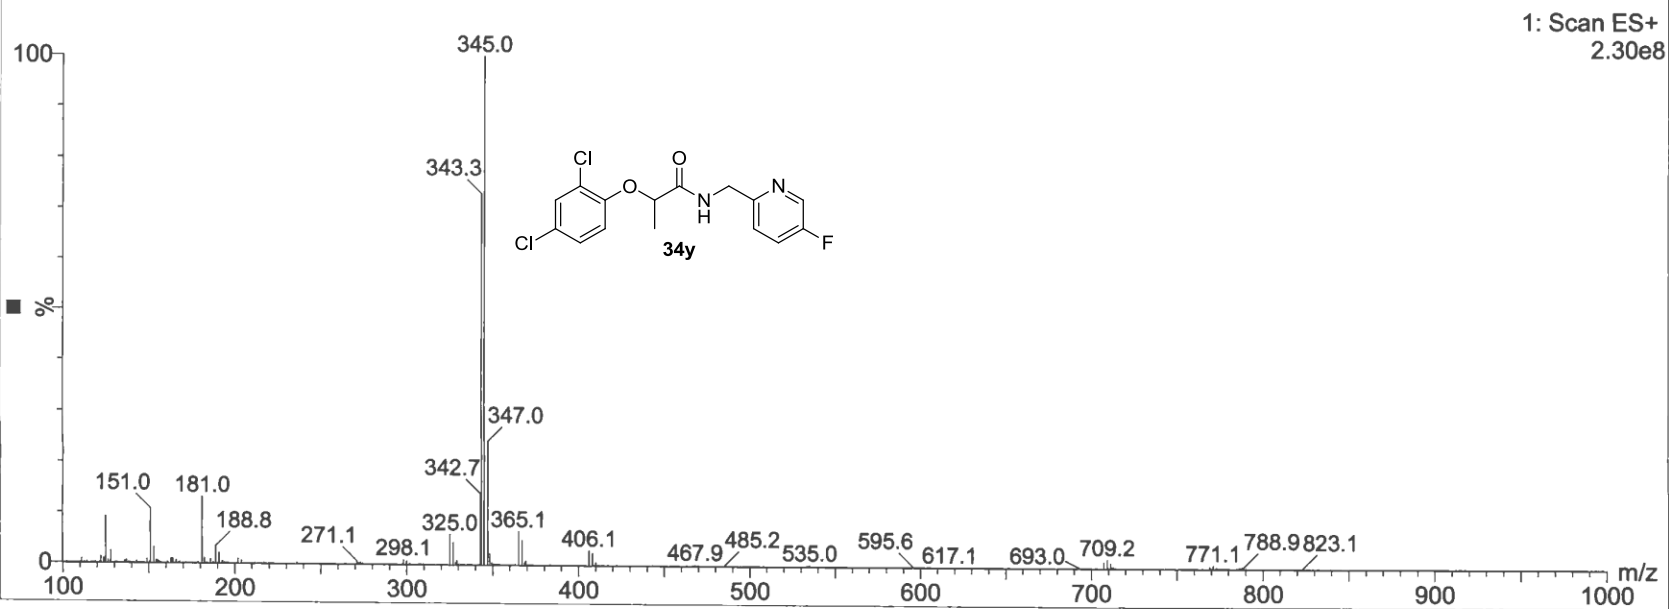

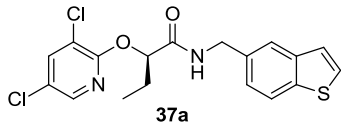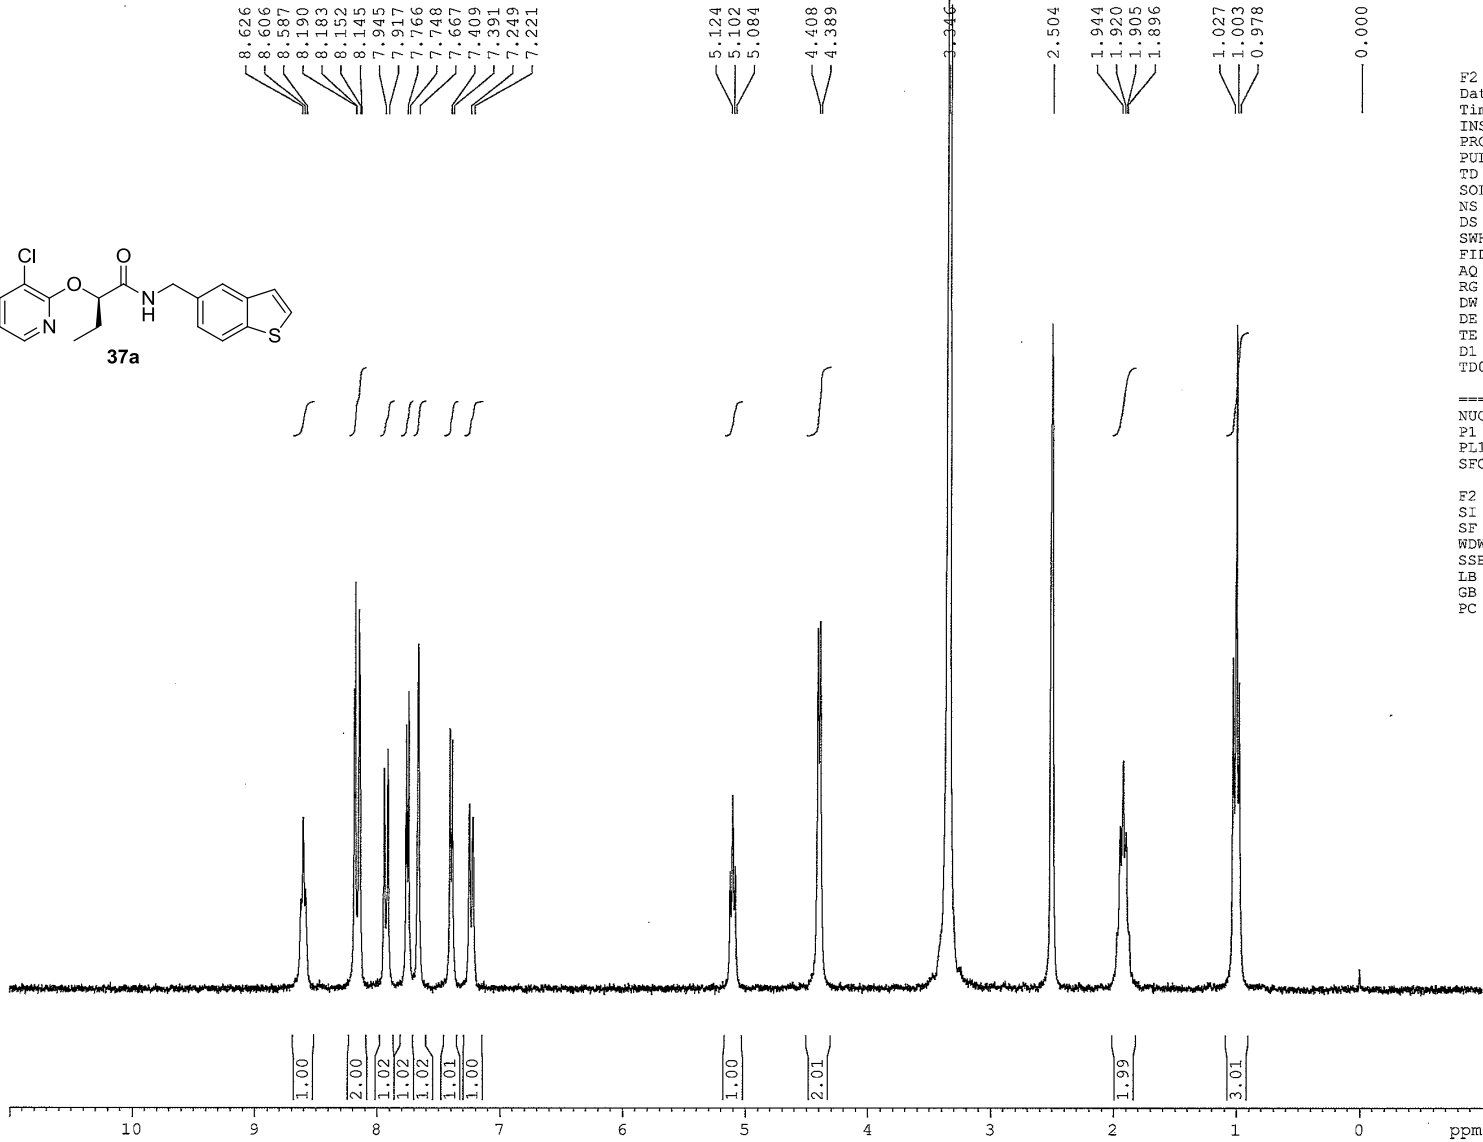

F2 - Acquisition Parameters  
 Date\_ 20141226  
 Time 13.08  
 INSTRUM spect  
 PROBHD 5 mm BBO BB-1H  
 PULPROG zg30  
 TD 65536  
 SOLVENT DMSO  
 NS 16  
 DS 2  
 SWH 6172.839 Hz  
 FIDRES 0.094190 Hz  
 AQ 5.3084660 sec  
 RG 2048  
 DW 81.000 usec  
 DE 6.50 usec  
 TE 298.2 K  
 D1 1.0000000 sec  
 TD0 1

===== CHANNEL f1 =====  
 NUC1 1H  
 P1 10.00 usec  
 PL1 3.00 dB  
 SFO1 299.3952489 MHz

F2 - Processing parameters  
 SI 32768  
 SF 299.3933987 MHz  
 WDW EM  
 SSB 0  
 LB 0.30 Hz  
 GB 0  
 PC 1.00

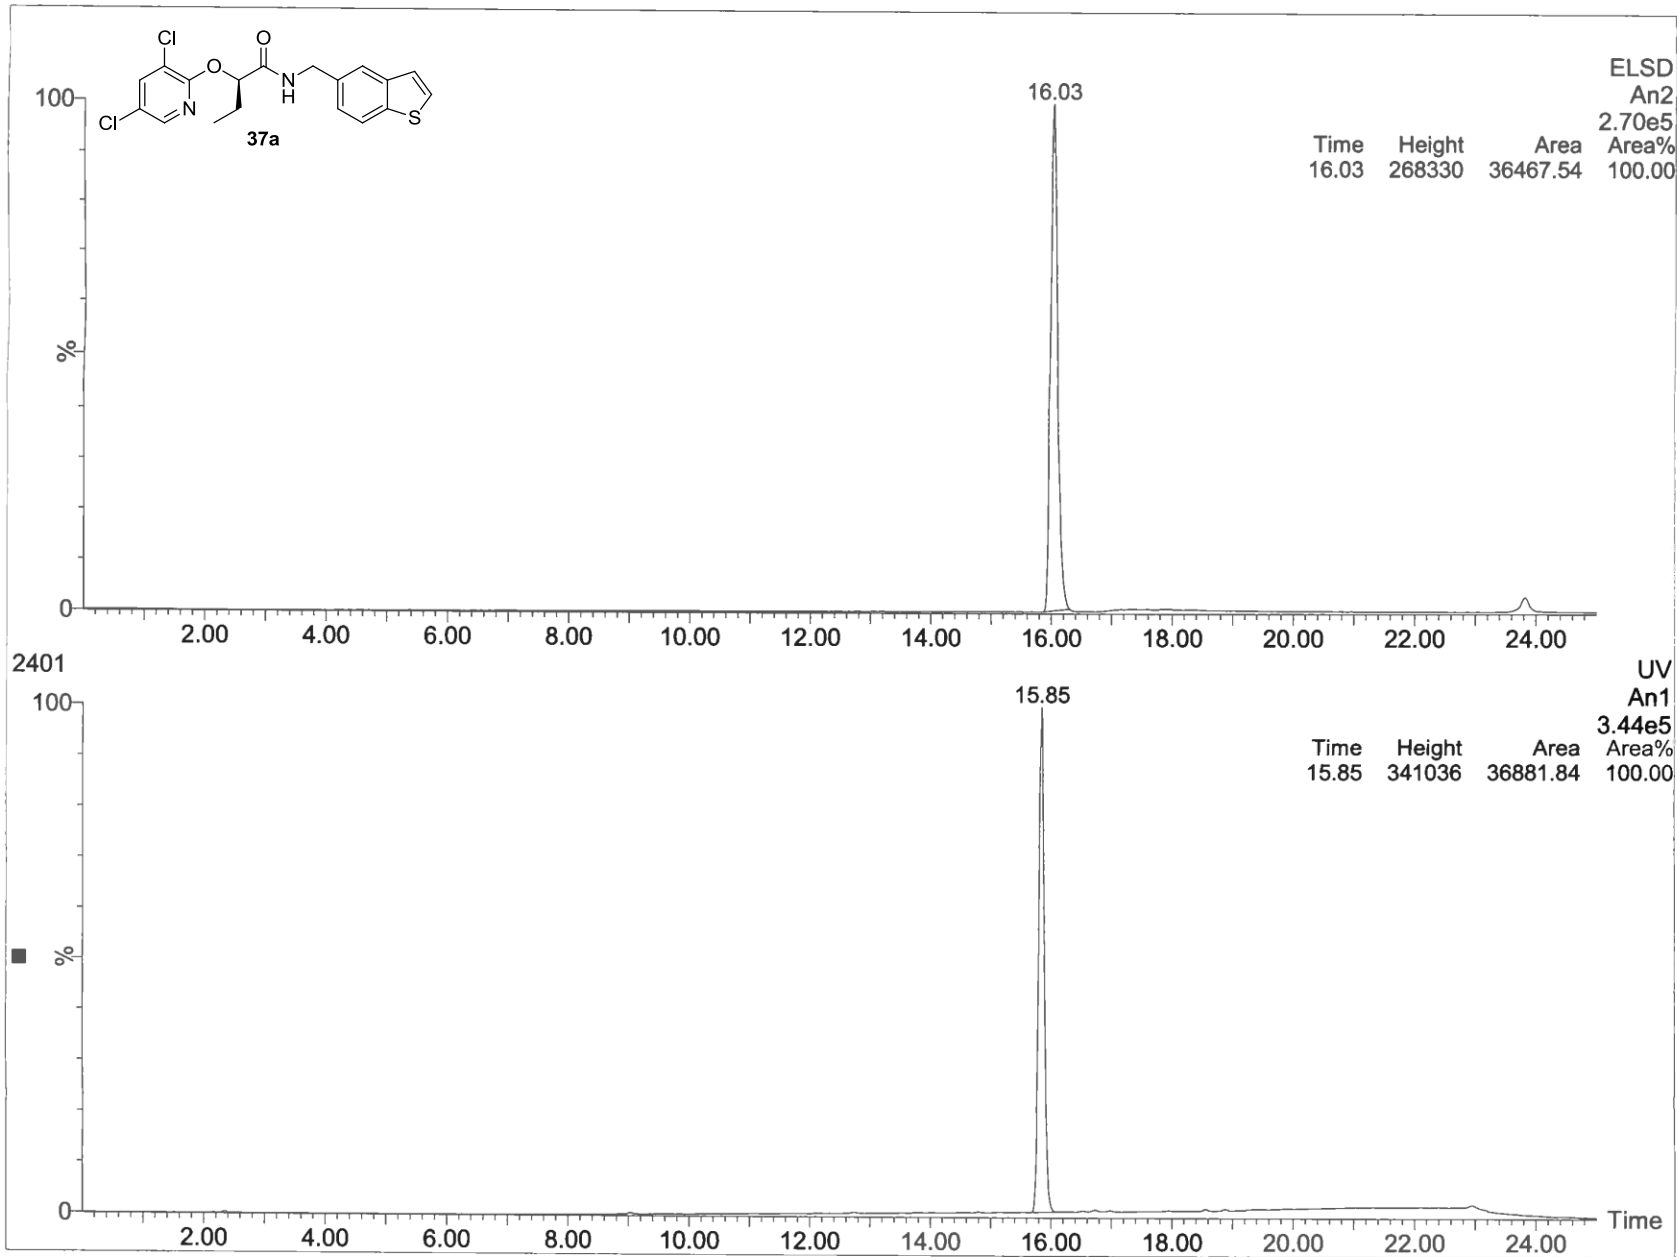

1: Scan ES+  
1.57e8

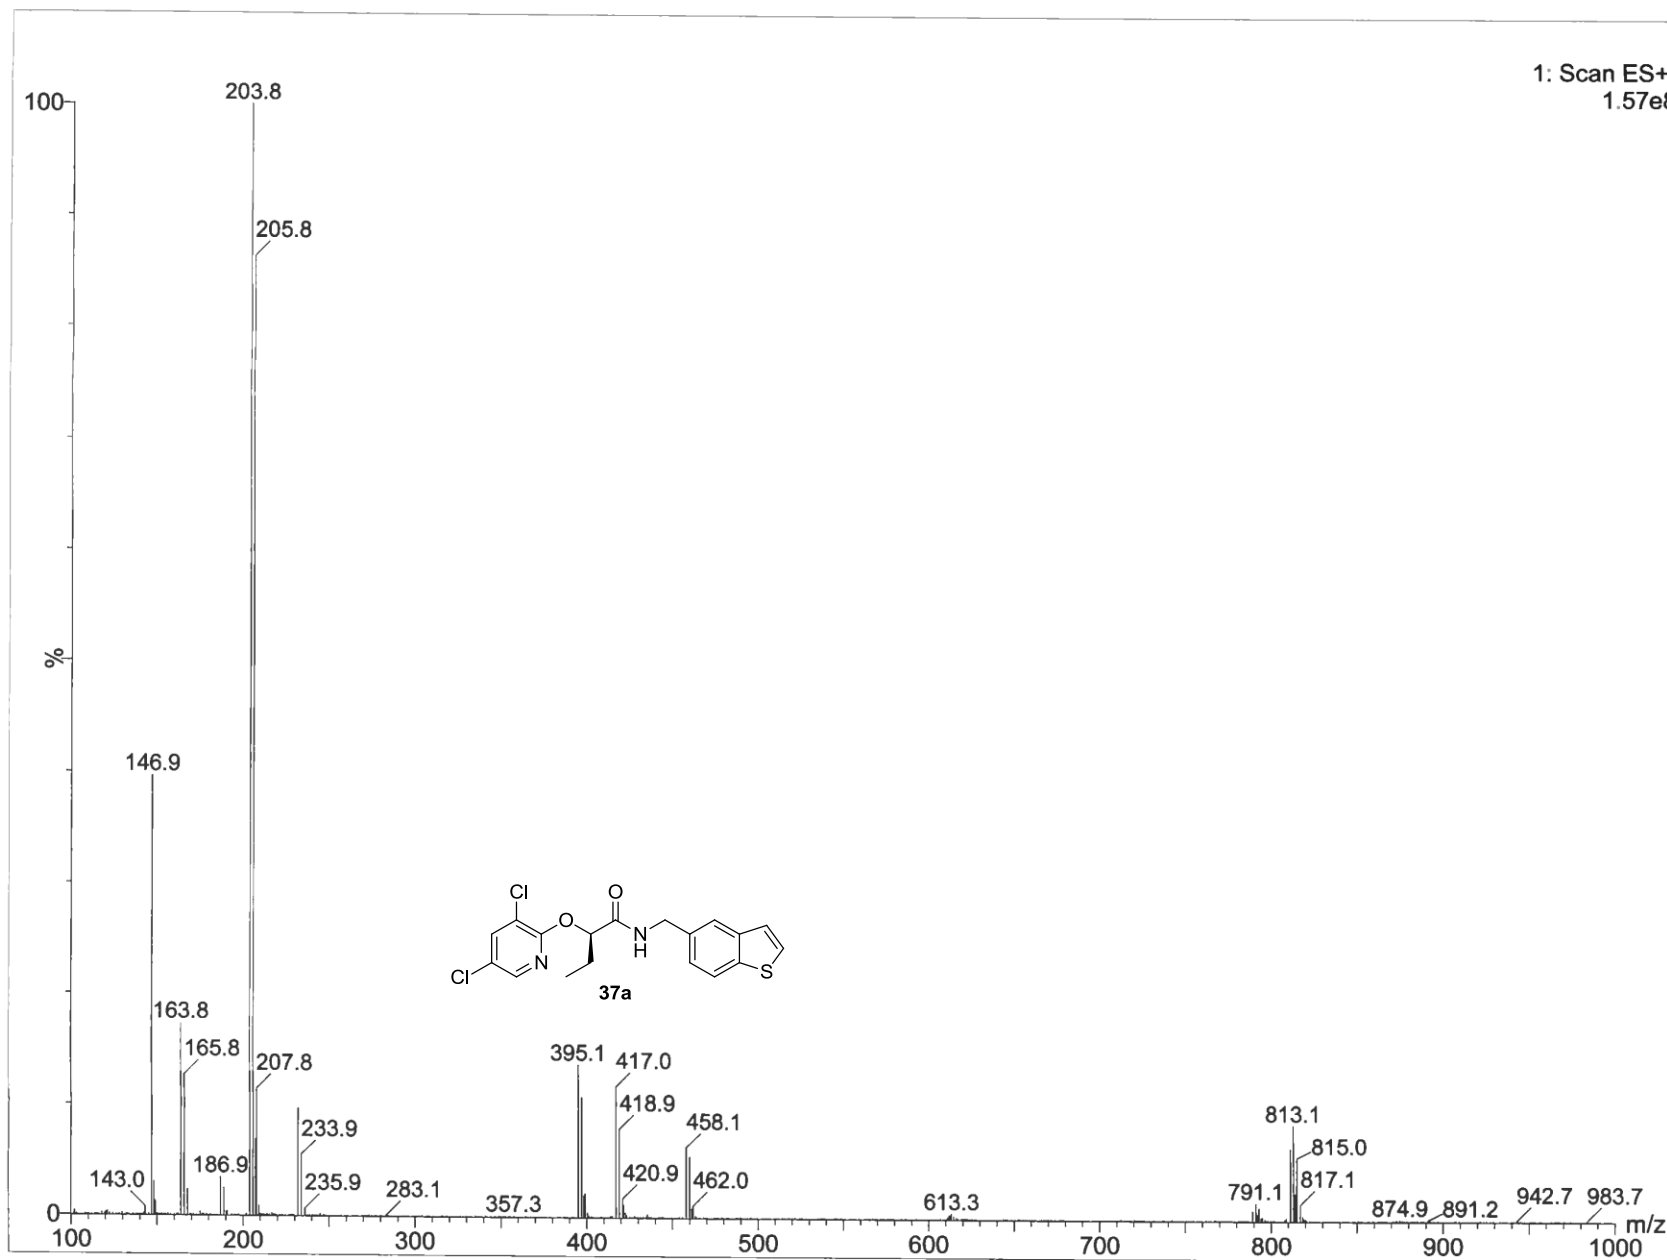

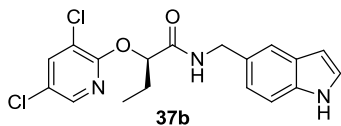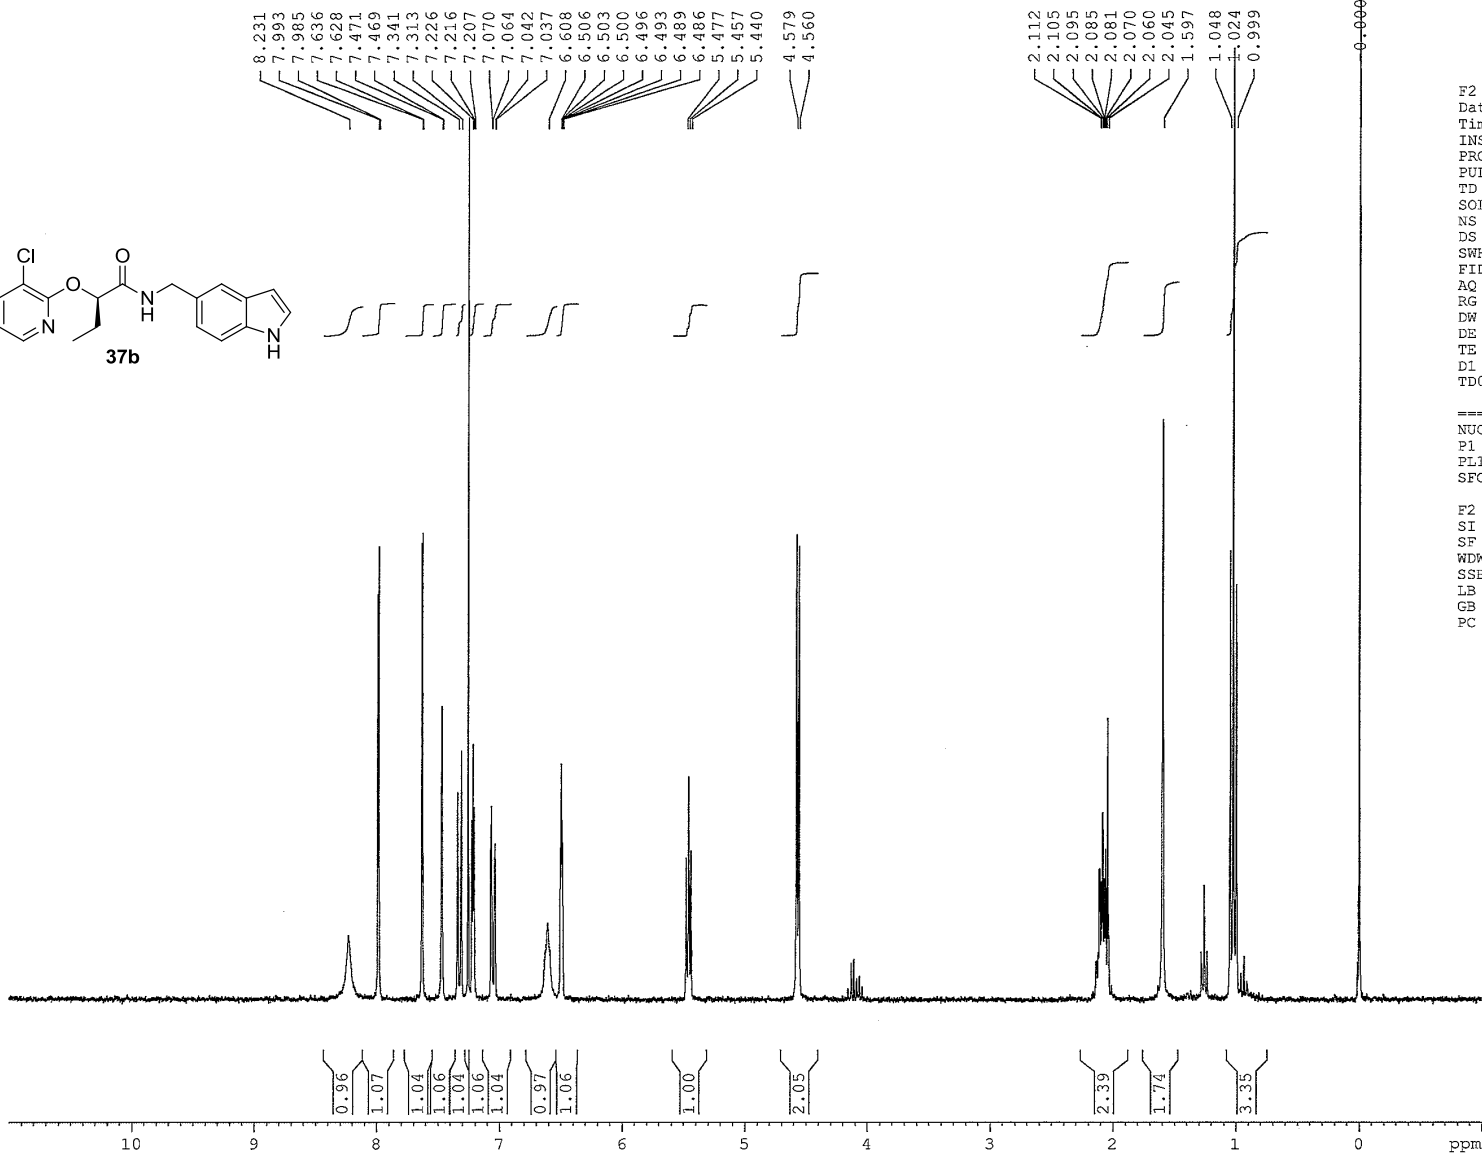

F2 - Acquisition Parameters  
 Date\_ 20131018  
 Time 12.26  
 INSTRUM spect  
 PROBHD 5 mm BBO BB-1H  
 PULPROG zg30  
 TD 65536  
 SOLVENT CDCl3  
 NS 16  
 DS 2  
 SWH 6172.839 Hz  
 FIDRES 0.094190 Hz  
 AQ 5.3084660 sec  
 RG 2580.3  
 DW 81.000 usec  
 DE 6.50 usec  
 TE 298.2 K  
 D1 1.00000000 sec  
 TD0 1

==== CHANNEL f1 =====  
 NUC1 1H  
 P1 10.00 usec  
 PL1 3.00 dB  
 SFO1 299.4518492 MHz

F2 - Processing parameters  
 SI 32768  
 SF 299.450091 MHz  
 WDW EM  
 SSB 0  
 LB 0.30 Hz  
 GB 0  
 PC 1.00

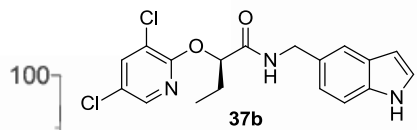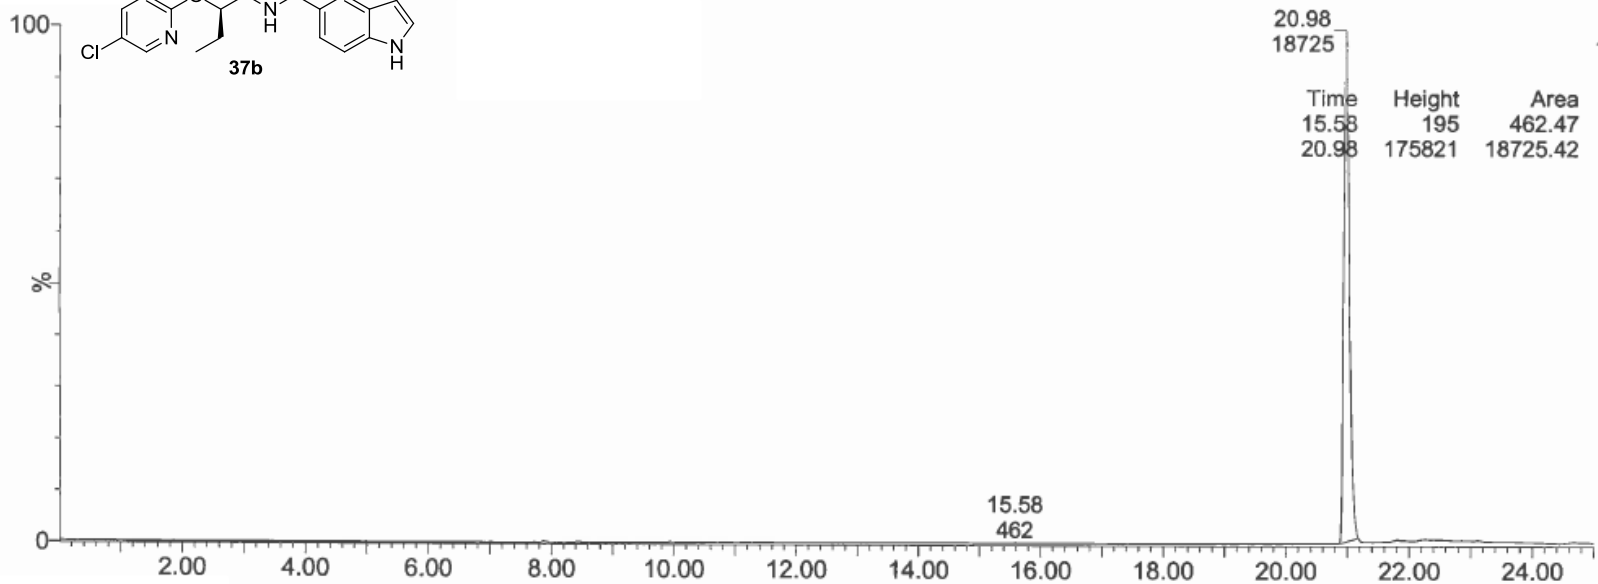

ELSD  
An2  
1.77e5  
Area  
Area%

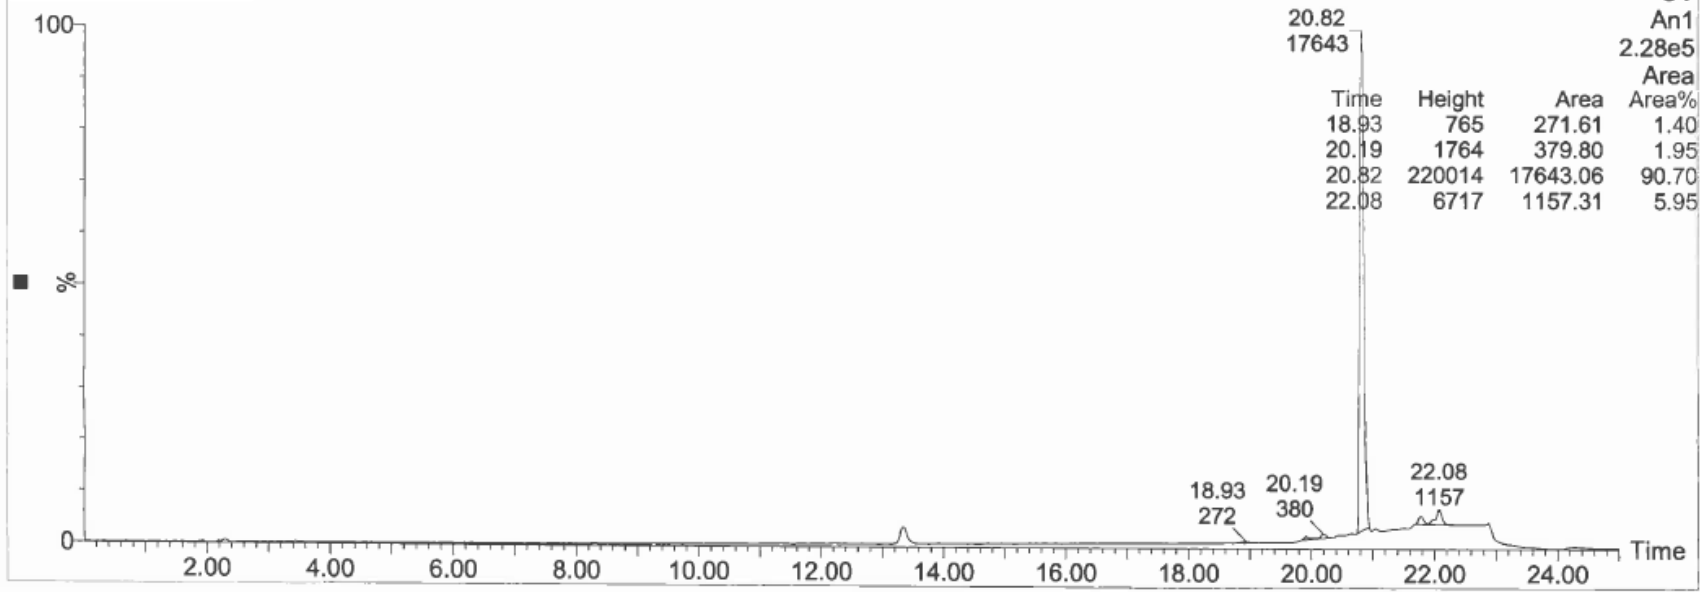

UV  
An1  
2.28e5  
Area  
Area%



1: Scan ES+  
1.16e8

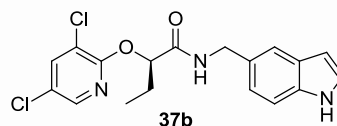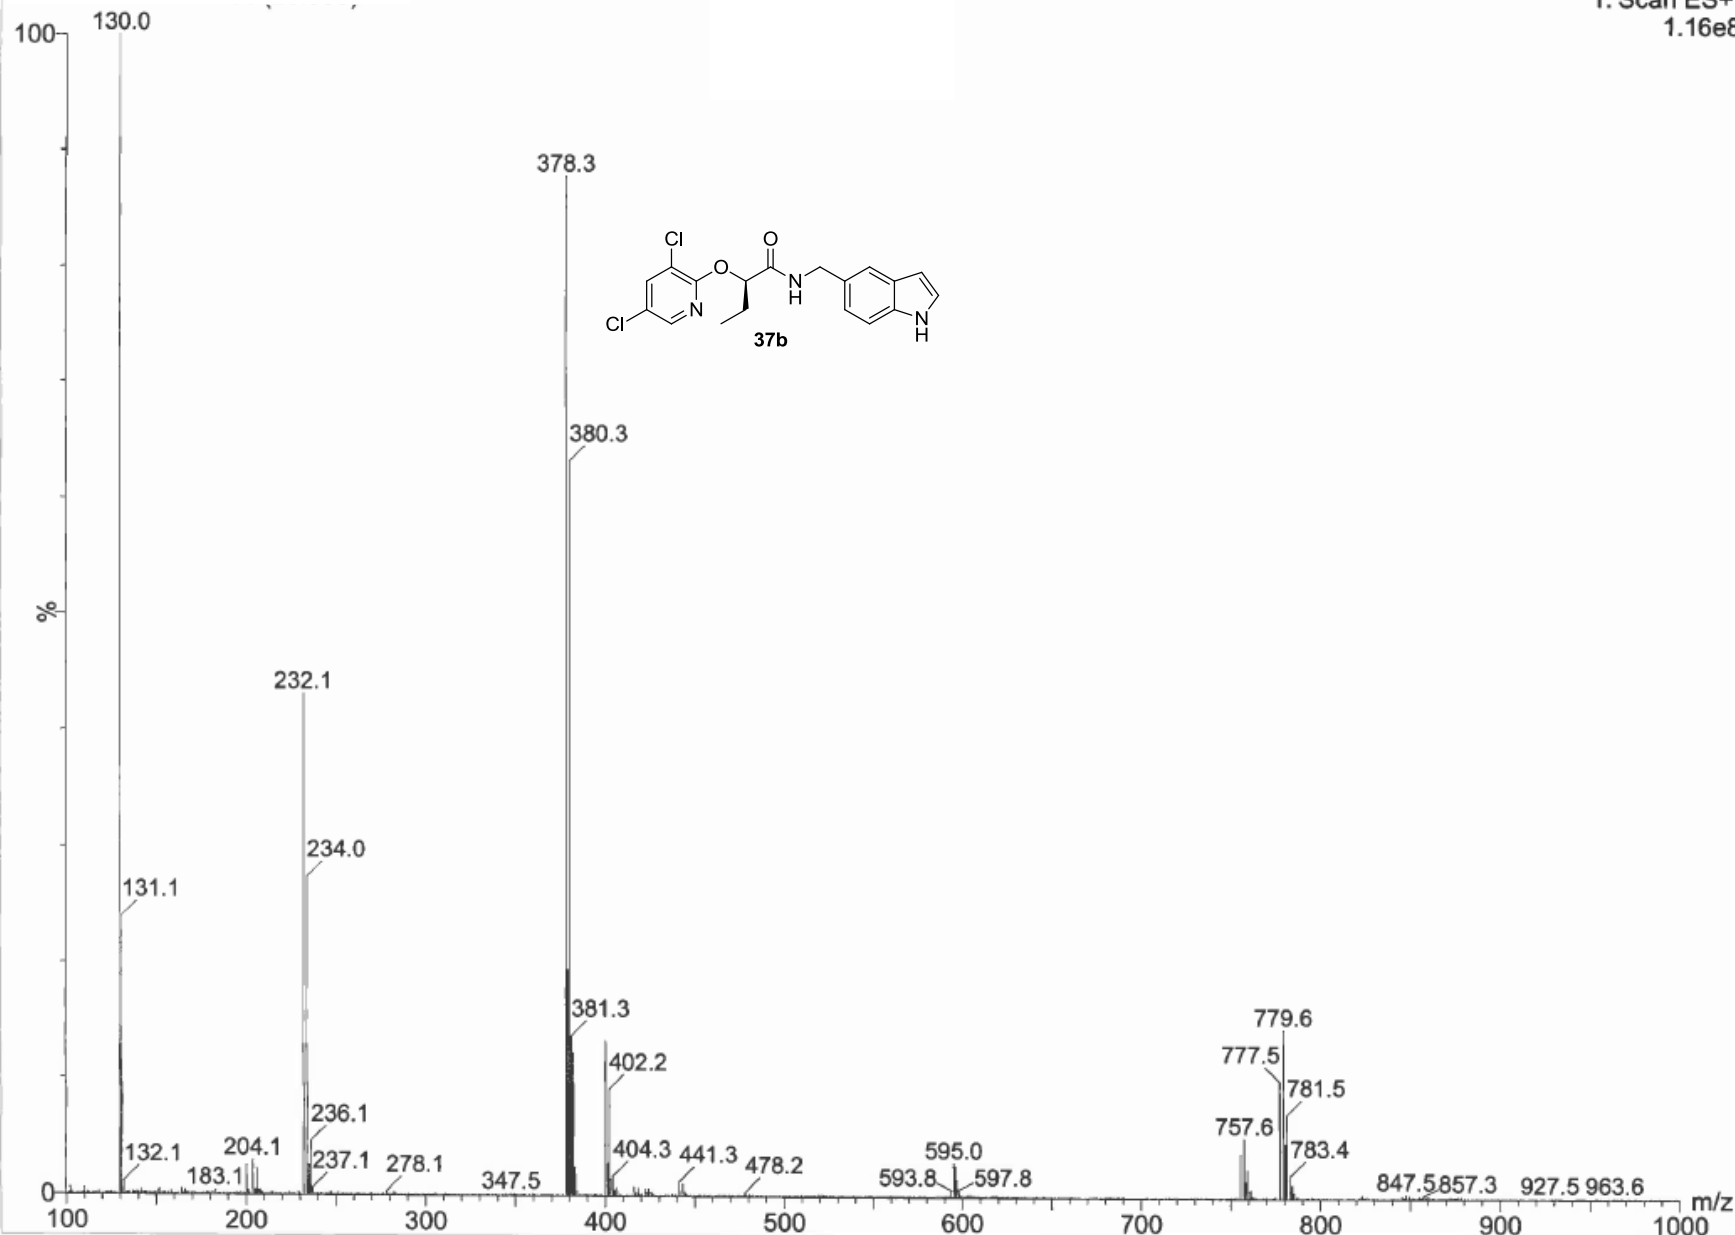

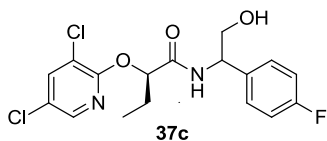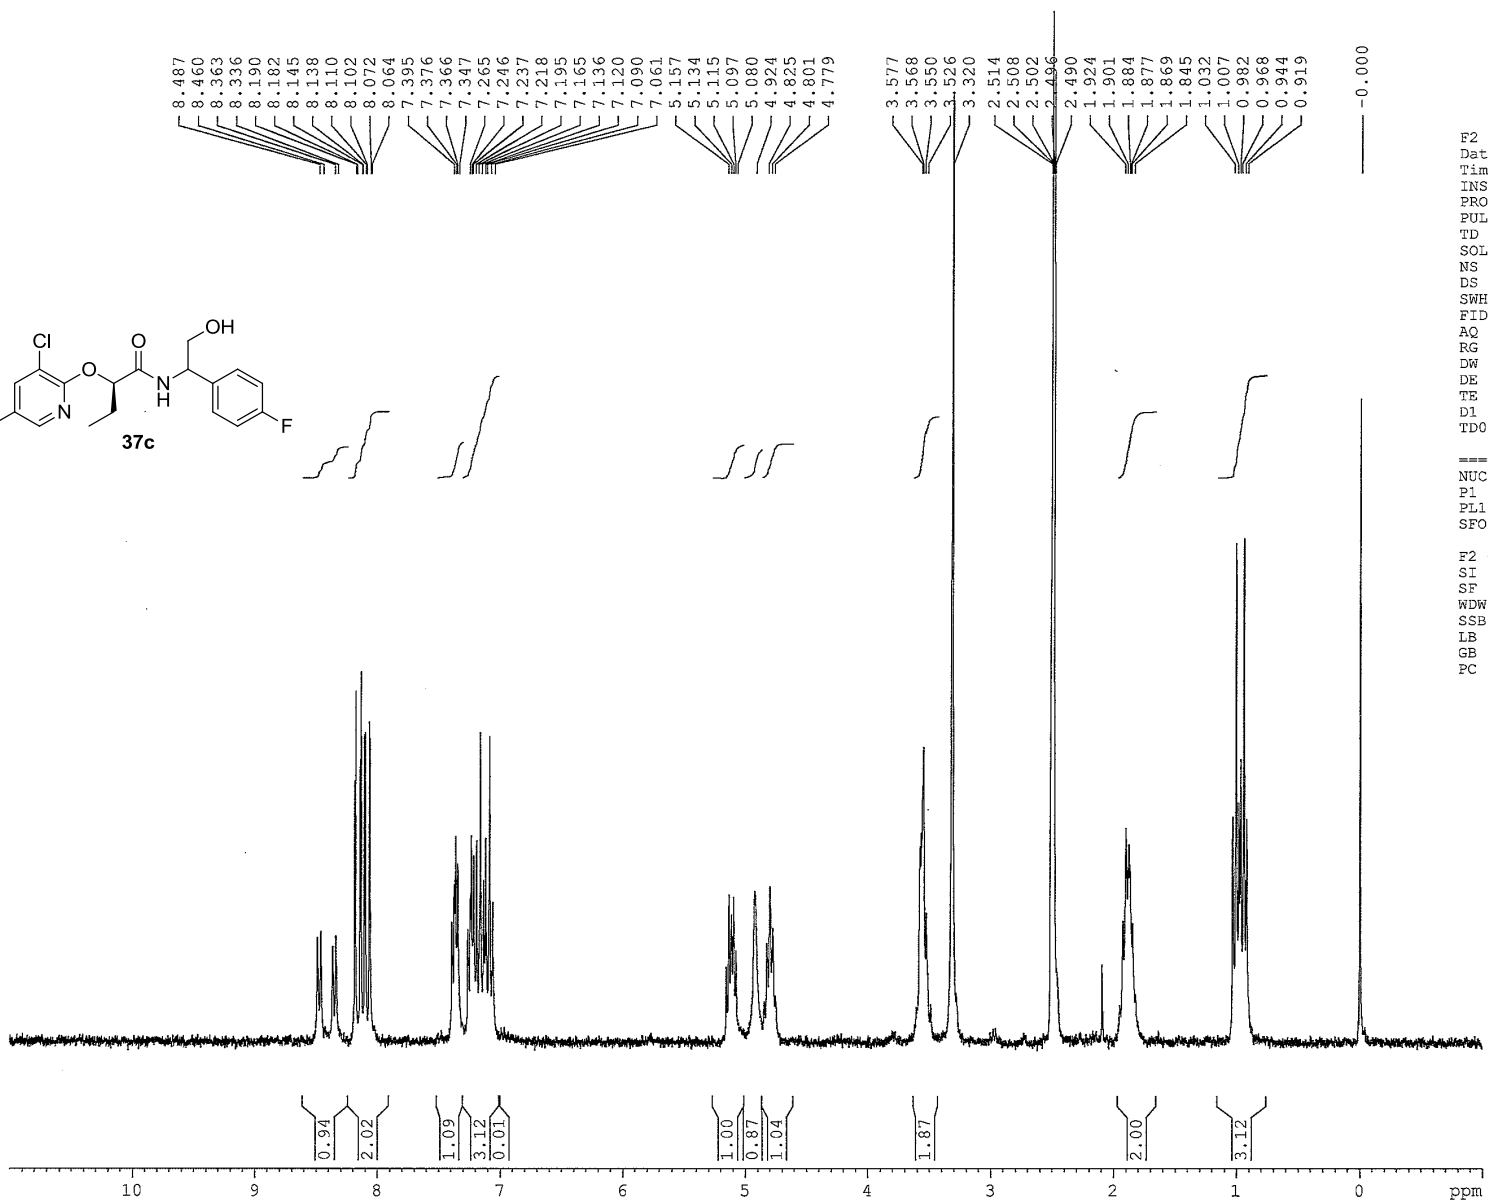

F2 - Acquisition Parameters  
 Date\_ 20131028  
 Time\_ 11.49  
 INSTRUM spect  
 PROBRD 5 mm BBO BB-1H  
 PULPROG zg30  
 TD 65536  
 SOLVENT DMSO  
 NS 16  
 DS 2  
 SWH 6172.839 Hz  
 FIDRES 0.094190 Hz  
 AQ 5.3084660 sec  
 RG 2580.3  
 DW 81.000 usec  
 DE 6.50 usec  
 TE 298.2 K  
 D1 1.00000000 sec  
 TD0 1

===== CHANNEL f1 =====  
 NUC1 1H  
 P1 10.00 usec  
 PL1 3.00 dB  
 SFO1 299.4518492 MHz

F2 - Processing parameters  
 SI 32768  
 SF 299.4500032 MHz  
 WDW EM  
 SSB 0  
 LB 0.30 Hz  
 GB 0  
 PC 1.00

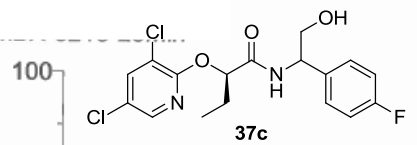

100  
%  
0

2.00 4.00 6.00 8.00 10.00 12.00 14.00 16.00 18.00 20.00 22.00 24.00

20.48  
11661

| Time  | Height | Area     | Area%  |
|-------|--------|----------|--------|
| 20.48 | 111529 | 11661.34 | 100.00 |

ELSD  
An2  
1.13e5  
Area  
Area%

100  
%  
0

2.00 4.00 6.00 8.00 10.00 12.00 14.00 16.00 18.00 20.00 22.00 24.00 Time

20.33  
3421

| Time  | Height | Area    | Area% |
|-------|--------|---------|-------|
| 20.33 | 40679  | 3420.76 | 98.63 |
| 20.64 | 625    | 47.62   | 1.37  |

UV  
An1  
4.58e4  
Area  
Area%

1: Scan ES+  
1.15e8

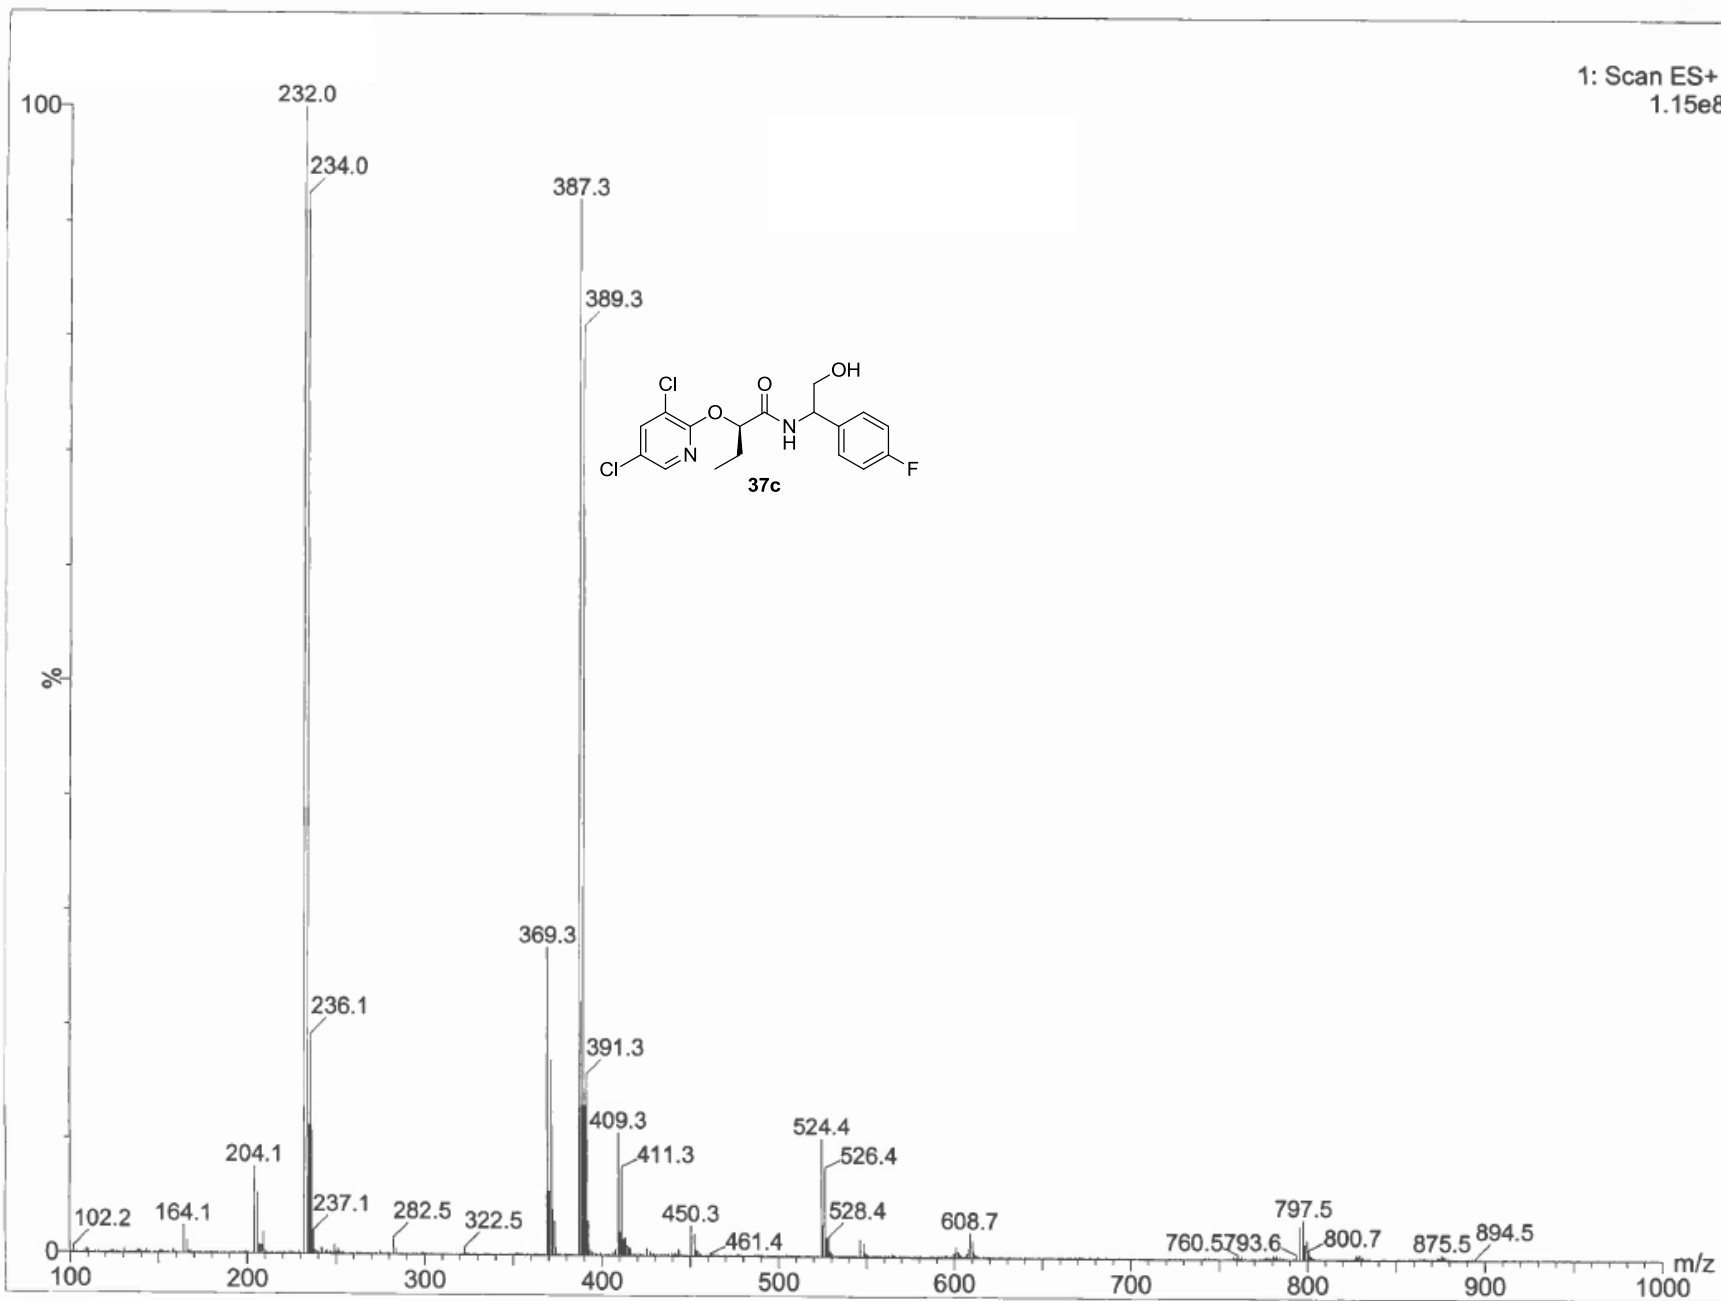

Supplement: NIHMS660087-supplement-Supplementary_data.pdf [file NIHMS660087-supplement-Supplementary_data.pdf]
